# Supplementary material for: Myh10 deficiency leads to defective extracellular matrix remodeling and pulmonary disease
Source: Nat Commun. 2018 Nov 2;9:4600. doi: 10.1038/s41467-018-06833-7 (PMC6214918; doi:10.1038/s41467-018-06833-7)
Supplement: Supplementary file 3 — Supplementary Data 1 [file 41467_2018_6833_MOESM3_ESM.xlsx]

## Sheet: RNAseq raw data
Ensembl gene id	Ensembl chromosome	Ensembl start	Ensembl stop	Ensembl strand	Ensembl gene	Ensembl biotype	UniProt accessions	UniProt names	UniProt proteins	UniProt genes	UniProt Ensembl transcripts	UniProt Ensembl proteins	UniProt Ensembl gene ids	baseMean	baseMeanA mut	baseMeanB wt	log2FoldChange wt/mut	pvalue	padj	diff. Expressed genes:	1562	wt vs. mut	Note
ENSMUSG00000064246	chr1	134182176	134190181	+	Chil1	protein_coding	D3YXU4,D3Z2Z5,Q61362 B0FEU7 D3Z2P2 Q3U291 Q4FJW9 Q8BKL8 Q99J84	D3YXU4_MOUSE,D3Z2Z5_MOUSE,CH3L1_MOUSE	Protein Chil1,Protein Chil1,Chitinase-3-like protein 1	Chil1 Chi3l1,Chil1 Chi3l1,Chi3l1 Brp39 Chil1	ENSMUST00000132873,ENSMUST00000133701,ENSMUST00000082060 ENSMUST00000153856	ENSMUSP00000118289,ENSMUSP00000121471,ENSMUSP00000080717	ENSMUSG00000064246,ENSMUSG00000064246,ENSMUSG00000064246	276.879	106.609	447.15	2.05818	3.74088e-07	9.67864e-05
ENSMUSG00000037071	chr19	44394451	44407709	-	Scd1	protein_coding	P13516 Q922I6	ACOD1_MOUSE	Acyl-CoA desaturase 1	Scd1	ENSMUST00000041331	ENSMUSP00000036936	ENSMUSG00000037071	2497.11	1173.17	3821.05	1.7027	2.54097e-06	0.000468744
ENSMUSG00000021795	chr14	41172212	41185198	-	Sftpd	protein_coding	P50404	SFTPD_MOUSE	Pulmonary surfactant-associated protein D	Sftpd Sftp4	ENSMUST00000077136	ENSMUSP00000076383	ENSMUSG00000021795	888.299	574.635	1201.96	1.06336	2.57542e-05	0.0025253
ENSMUSG00000061100	chr16	48842552	48844461	+	Retnla	protein_coding	G3X8W2	G3X8W2_MOUSE	Resistin like alpha Resistin-like alpha	Retnla mCG_128611	ENSMUST00000023329	ENSMUSP00000023329	ENSMUSG00000061100	1544.65	1060.45	2028.86	0.935341	6.02685e-23	6.55963e-19
ENSMUSG00000026874	chr2	34983331	35061438	-	Hc	protein_coding	P06684 A2AS36	CO5_MOUSE	Complement C5	C5 Hc	ENSMUST00000028233	ENSMUSP00000028233	ENSMUSG00000026874	2008.94	1430.34	2587.53	0.854766	6.54131e-05	0.00523497
ENSMUSG00000037440	chr10	23894688	23905343	+	Vnn1	protein_coding	Q9Z0K8 Q3TJI0 Q8VCT1 Q9DCH8	VNN1_MOUSE	Pantetheinase	Vnn1	ENSMUST00000041416	ENSMUSP00000040599	ENSMUSG00000037440	652.012	484.345	819.68	0.75781	7.36804e-08	2.86406e-05
ENSMUSG00000055148	chr8	72319033	72321656	+	Klf2	protein_coding	Q60843 B2RS60	KLF2_MOUSE	Krueppel-like factor 2	Klf2 Lklf	ENSMUST00000067912	ENSMUSP00000064823	ENSMUSG00000055148	556.357	414.96	697.755	0.748341	3.92659e-08	1.78071e-05
ENSMUSG00000058297	chr10	60106219	60135198	+	Spock2	protein_coding	F6SLR4,Q9ER58	F6SLR4_MOUSE,TICN2_MOUSE	Testican-2,Testican-2	Spock2,Spock2 Ticn2	ENSMUST00000165024,ENSMUST00000121820	ENSMUSP00000127155,ENSMUSP00000113115	ENSMUSG00000058297,ENSMUSG00000058297	1346.78	1006.01	1687.55	0.745712	0.00130596	0.0442807
ENSMUSG00000003541	chr17	35821684	35822923	+	Ier3	protein_coding	Q91VZ5	Q91VZ5_MOUSE	Gly96 protein Ier3 protein Immediate early response 3 Immediate early response 3, isoform CRA_b Radiation-inducible immediate-early gene IEX-1	Ier3 mCG_19912	ENSMUST00000003635	ENSMUSP00000003635	ENSMUSG00000003541	571.868	427.193	716.542	0.744802	1.48994e-08	8.59492e-06
ENSMUSG00000031722	chr8	109575130	109579172	-	Hp	protein_coding	Q61646	HPT_MOUSE	Haptoglobin	Hp	ENSMUST00000074898	ENSMUSP00000074436	ENSMUSG00000031722	3340.25	2511.47	4169.03	0.730948	0.00119208	0.0418535
ENSMUSG00000029449	chr5	123103044	123132692	-	Rhof	protein_coding	Q8BYP3	RHOF_MOUSE	Rho-related GTP-binding protein RhoF	Rhof Arhf	ENSMUST00000031401 ENSMUST00000160479	ENSMUSP00000031401	ENSMUSG00000029449	513.873	386.55	641.195	0.728628	2.37847e-07	7.39635e-05
ENSMUSG00000040752	chr14	54941981	54966927	-	Myh6	protein_coding	B8JJH3,B8JJH5,Q02566 Q64258 Q64738,Q1WNP4	B8JJH3_MOUSE,B8JJH5_MOUSE,MYH6_MOUSE,Q1WNP4_MOUSE	Myosin-6,Myosin-6,Myosin-6,Cardiac myosin heavy chain alpha Myosin-6	Myh6,Myh6,Myh6 Myhca,Myh6	ENSMUST00000111456,ENSMUST00000145322,ENSMUST00000081857,ENSMUST00000124930 ENSMUST00000134256	ENSMUSP00000107083,ENSMUSP00000115326,ENSMUSP00000080538,ENSMUSP00000115615	ENSMUSG00000040752,ENSMUSG00000040752,ENSMUSG00000040752,ENSMUSG00000040752	1181.13	888.861	1473.41	0.728484	0.000616387	0.0270514
ENSMUSG00000079018	chr15	75044018	75048830	-	Ly6c1	protein_coding	P0CW02 P09568 Q58E40 Q8C2D8 Q91XG0	LY6C1_MOUSE	Lymphocyte antigen 6C1	Ly6c1	ENSMUST00000065408 ENSMUST00000179762	ENSMUSP00000066954	ENSMUSG00000079018	388.566	300.994	476.138	0.659888	1.21313e-05	0.00144006
ENSMUSG00000038264	chr9	57940113	57962864	+	Sema7a	protein_coding	Q9QUR8 O88371	SEM7A_MOUSE	Semaphorin-7A	Sema7a Cd108 Semal Semk1	ENSMUST00000043059	ENSMUSP00000042211	ENSMUSG00000038264	890.6	691.72	1089.48	0.654618	9.22999e-09	7.17566e-06
ENSMUSG00000020469	chr11	5896637	5898782	-	Myl7	protein_coding	Q9QVP4 Q63977 Q9JIE8	MLRA_MOUSE	Myosin regulatory light chain 2, atrial isoform	Myl7 Mylc2a	ENSMUST00000102921	ENSMUSP00000099985	ENSMUSG00000020469	844.635	656.808	1032.46	0.651746	2.58219e-07	7.80683e-05
ENSMUSG00000029375	chr5	90794534	90803067	+	Cxcl15	protein_coding	Q9WVL7 Q3UQ15	CXL15_MOUSE	C-X-C motif chemokine 15	Cxcl15 Scyb15	ENSMUST00000031322	ENSMUSP00000031322	ENSMUSG00000029375	9135.92	7131.15	11140.7	0.643558	0.00149011	0.0482688
ENSMUSG00000037846	chr10	67979570	68059740	+	Rtkn2	protein_coding	E9QP76,Q14B46 Q8BFP3 Q8BFP8 Q8BFQ0	E9QP76_MOUSE,RTKN2_MOUSE	Rhotekin-2,Rhotekin-2	Rtkn2,Rtkn2 Plekhk1	ENSMUST00000105437,ENSMUST00000068994 ENSMUST00000117086 ENSMUST00000118160 ENSMUST00000147556	ENSMUSP00000101077,ENSMUSP00000070717	ENSMUSG00000037846,ENSMUSG00000037846	1025.11	803.8	1246.41	0.632236	2.44814e-10	3.3307e-07
ENSMUSG00000020566	chr12	17284721	17329359	-	Atp6v1c2	protein_coding	D3YVW5,D3YZX0,D3Z1Q7,D3Z5W3,D6RCW6,Q99L60 Q6PHA4	D3YVW5_MOUSE,D3YZX0_MOUSE,D3Z1Q7_MOUSE,D3Z5W3_MOUSE,D6RCW6_MOUSE,VATC2_MOUSE	V-type proton ATPase subunit C 2,V-type proton ATPase subunit C 2,V-type proton ATPase subunit C 2,V-type proton ATPase subunit C 2,V-type proton ATPase subunit C 2,V-type proton ATPase subunit C 2	Atp6v1c2,Atp6v1c2,Atp6v1c2,Atp6v1c2,Atp6v1c2,Atp6v1c2 Atp6c2	ENSMUST00000143131,ENSMUST00000127185,ENSMUST00000153090,ENSMUST00000156727,ENSMUST00000140751,ENSMUST00000020884 ENSMUST00000095820	ENSMUSP00000117993,ENSMUSP00000118635,ENSMUSP00000119686,ENSMUSP00000117139,ENSMUSP00000123415,ENSMUSP00000020884	ENSMUSG00000020566,ENSMUSG00000020566,ENSMUSG00000020566,ENSMUSG00000020566,ENSMUSG00000020566,ENSMUSG00000020566	798.867	626.533	971.202	0.631566	3.80916e-07	9.67864e-05
ENSMUSG00000017897	chr2	165595032	165771727	+	Eya2	protein_coding	O08575 A2A5S4 P97925	EYA2_MOUSE	Eyes absent homolog 2	Eya2 Eab1	ENSMUST00000063433 ENSMUST00000088132	ENSMUSP00000066244	ENSMUSG00000017897	277.882	218.058	337.707	0.62872	0.000522451	0.0243007
ENSMUSG00000022218	chr14	55700009	55713492	-	Tgm1	protein_coding	Q9JLF6 Q8R0T9	TGM1_MOUSE	Protein-glutamine gamma-glutamyltransferase K	Tgm1	ENSMUST00000002389 ENSMUST00000168729 ENSMUST00000178034	ENSMUSP00000002389	ENSMUSG00000022218	569.235	448.692	689.779	0.619288	2.99072e-06	0.000520227
ENSMUSG00000061878	chr11	116530925	116536674	+	Sphk1	protein_coding	B1AT85,B1AT86,B1AT87,B1AT88,B1AT89,Q8CI15 O88886 Q3U2E3 Q91ZN3	B1AT85_MOUSE,B1AT86_MOUSE,B1AT87_MOUSE,B1AT88_MOUSE,B1AT89_MOUSE,SPHK1_MOUSE	Sphingosine kinase 1,Sphingosine kinase 1,Sphingosine kinase 1,Sphingosine kinase 1,Sphingosine kinase 1,Sphingosine kinase 1	Sphk1,Sphk1,Sphk1,Sphk1,Sphk1,Sphk1	ENSMUST00000155102,ENSMUST00000124682,ENSMUST00000138840,ENSMUST00000145737,ENSMUST00000154034,ENSMUST00000063396 ENSMUST00000063446 ENSMUST00000100201 ENSMUST00000106386 ENSMUST00000106387 ENSMUST00000106388 ENSMUST00000141798	ENSMUSP00000114819,ENSMUSP00000116055,ENSMUSP00000121064,ENSMUSP00000114622,ENSMUSP00000121219,ENSMUSP00000064743	ENSMUSG00000061878,ENSMUSG00000061878,ENSMUSG00000061878,ENSMUSG00000061878,ENSMUSG00000061878,ENSMUSG00000061878	474.92	375.147	574.692	0.614001	0.000157347	0.00973051
ENSMUSG00000061086	chr11	104550663	104595753	+	Myl4	protein_coding	A2A6Q8,D6RFU4,F6XL79,Q9CZ19	A2A6Q8_MOUSE,D6RFU4_MOUSE,F6XL79_MOUSE,Q9CZ19_MOUSE	Myosin light chain 4,Myosin light chain 4,Myosin light chain 4,Myosin light chain 4 Myosin, light polypeptide 4	Myl4,Myl4,Myl4,Myl4	ENSMUST00000153761,ENSMUST00000130588,ENSMUST00000136244,ENSMUST00000018800 ENSMUST00000106956 ENSMUST00000106957	ENSMUSP00000114345,ENSMUSP00000122748,ENSMUSP00000118284,ENSMUSP00000018800	ENSMUSG00000061086,ENSMUSG00000061086,ENSMUSG00000061086,ENSMUSG00000061086	579.923	461.261	698.585	0.59779	0.000111443	0.00762862
ENSMUSG00000076441	chr2	31470207	31520672	+	Ass1	protein_coding	P16460	ASSY_MOUSE	Argininosuccinate synthase	Ass1 Ass	ENSMUST00000102840	ENSMUSP00000099904	ENSMUSG00000076441	633.915	505.839	761.991	0.590139	5.36295e-06	0.000799593
ENSMUSG00000003283	chr2	153108468	153151441	+	Hck	protein_coding	F6UND7,P08103 Q0VH03 Q3UD17	F6UND7_MOUSE,HCK_MOUSE	Tyrosine-protein kinase HCK,Tyrosine-protein kinase HCK	Hck,Hck	ENSMUST00000003370,ENSMUST00000109799	ENSMUSP00000003370,ENSMUSP00000105423	ENSMUSG00000003283,ENSMUSG00000003283	412.066	329.789	494.343	0.582516	0.00113504	0.0406373
ENSMUSG00000015950	chr5	134220053	134229625	-	Ncf1	protein_coding	F8WH69,Q09014 O70144 Q3UE58 Q9JI34,S4R293	F8WH69_MOUSE,NCF1_MOUSE,S4R293_MOUSE	Neutrophil cytosol factor 1,Neutrophil cytosol factor 1,Neutrophil cytosol factor 1	Ncf1,Ncf1,Ncf1	ENSMUST00000016094,ENSMUST00000111275 ENSMUST00000146354,ENSMUST00000144086	ENSMUSP00000016094,ENSMUSP00000106906,ENSMUSP00000138547	ENSMUSG00000015950,ENSMUSG00000015950,ENSMUSG00000015950	740.362	593.724	887	0.578339	8.41307e-06	0.00107727
ENSMUSG00000053198	chr7	27499324	27520214	+	Prx	protein_coding	E9QQ57,O55103 O55104,Q6NVF7	E9QQ57_MOUSE,PRAX_MOUSE,Q6NVF7_MOUSE	Periaxin,Periaxin,Periaxin Prx protein	Prx,Prx,Prx	ENSMUST00000098644,ENSMUST00000108355,ENSMUST00000065487	ENSMUSP00000096241,ENSMUSP00000103992,ENSMUSP00000066110	ENSMUSG00000053198,ENSMUSG00000053198,ENSMUSG00000053198	1551.9	1245.05	1858.75	0.577744	1.49933e-08	8.59492e-06
ENSMUSG00000015452	chr17	34597862	34600936	+	Ager	protein_coding	C5H3H4,C5H3H7,C5H7W9,O35444	C5H3H4_MOUSE,C5H3H7_MOUSE,C5H7W9_MOUSE,O35444_MOUSE	Advanced glycosylation end product-specific receptor Advanced glycosylation end products receptor splice variant 1 Advanced glycosylation end products receptor splice variant 3,Advanced glycosylation end product-specific receptor Advanced glycosylation end product-specific receptor, isoform CRA_a Advanced glycosylation end products receptor splice variant 4,Advanced glycosylation end product-spec…	Ager,Ager mCG_5497,Ager,Ager RAGE mCG_5497	ENSMUST00000174069,ENSMUST00000174496,ENSMUST00000173992,ENSMUST00000015596	ENSMUSP00000133391,ENSMUSP00000134401,ENSMUSP00000134579,ENSMUSP00000015596	ENSMUSG00000015452,ENSMUSG00000015452,ENSMUSG00000015452,ENSMUSG00000015452	14537	11673.5	17400.5	0.575851	9.263e-05	0.00676634
ENSMUSG00000026414	chr1	135836354	135852260	+	Tnnt2	protein_coding	J3QQ13,K3W4R6,K3W4R7,P50752 Q64360 Q64377,Q6P3Z7	J3QQ13_MOUSE,K3W4R6_MOUSE,K3W4R7_MOUSE,TNNT2_MOUSE,Q6P3Z7_MOUSE	Troponin T, cardiac muscle,Troponin T, cardiac muscle,Troponin T, cardiac muscle,Troponin T, cardiac muscle,Tnnt2 protein Troponin T, cardiac muscle	Tnnt2,Tnnt2,Tnnt2,Tnnt2,Tnnt2	ENSMUST00000178204,ENSMUST00000112085,ENSMUST00000112086,ENSMUST00000027671 ENSMUST00000112087 ENSMUST00000178854,ENSMUST00000179863	ENSMUSP00000137579,ENSMUSP00000107715,ENSMUSP00000107716,ENSMUSP00000027671,ENSMUSP00000137093	ENSMUSG00000026414,ENSMUSG00000026414,ENSMUSG00000026414,ENSMUSG00000026414,ENSMUSG00000026414	769.827	618.266	921.388	0.574813	1.84995e-05	0.00203382
ENSMUSG00000022587	chr15	74955051	74959905	+	Ly6e	protein_coding	Q99JA5	Q99JA5_MOUSE	Ly6e protein Lymphocyte antigen 6 complex, locus E Lymphocyte antigen 6 complex, locus E, isoform CRA_a Lymphocyte antigen 6E	Ly6e mCG_2785	ENSMUST00000051698 ENSMUST00000169343	ENSMUSP00000056703	ENSMUSG00000022587	4388.98	3526.89	5251.06	0.574076	4.4377e-15	1.2075e-11
ENSMUSG00000050914	chr8	45996902	45999867	-	Ankrd37	protein_coding	Q569N2 Q8CHS0	ANR37_MOUSE	Ankyrin repeat domain-containing protein 37	Ankrd37	ENSMUST00000053558	ENSMUSP00000056828	ENSMUSG00000050914	573.679	461.812	685.546	0.56893	8.22032e-06	0.00106512
ENSMUSG00000021789	chr14	41131782	41136452	+	Sftpa1	protein_coding	Q9CQI1	Q9CQI1_MOUSE	MCG1040641, isoform CRA_a Pulmonary surfactant-associated protein A	Sftpa1 mCG_1040641	ENSMUST00000022314 ENSMUST00000170719	ENSMUSP00000022314	ENSMUSG00000021789	8271.87	6662.61	9881.13	0.568518	8.80748e-13	1.36944e-09
ENSMUSG00000006574	chr11	102348824	102366203	-	Slc4a1	protein_coding	P04919	B3AT_MOUSE	Band 3 anion transport protein	Slc4a1 Ae1	ENSMUST00000006749	ENSMUSP00000006749	ENSMUSG00000006574	369.852	299.193	440.512	0.556563	0.00108102	0.0393506
ENSMUSG00000031825	chr8	119992438	120052793	+	Crispld2	protein_coding	Q8BZQ2 Q3U4C7 Q9D2R3	CRLD2_MOUSE	Cysteine-rich secretory protein LCCL domain-containing 2	Crispld2	ENSMUST00000034282 ENSMUST00000108972 ENSMUST00000132583	ENSMUSP00000034282	ENSMUSG00000031825	391.903	317.7	466.106	0.551549	0.000184877	0.0108768
ENSMUSG00000025491	chr7	140967221	140969825	+	Ifitm1	protein_coding	Q9D103 Q8R2S7	IFM1_MOUSE	Interferon-induced transmembrane protein 1	Ifitm1	ENSMUST00000026564 ENSMUST00000106040 ENSMUST00000106042	ENSMUSP00000026564	ENSMUSG00000025491	479.226	389.311	569.14	0.546692	0.000180177	0.0107161
ENSMUSG00000024892	chr19	4510472	4621752	+	Pcx	protein_coding	E9QPD7,G5E8R3	E9QPD7_MOUSE,G5E8R3_MOUSE	Pyruvate carboxylase,Pyruvate carboxylase	Pcx,Pcx mCG_8397	ENSMUST00000068004,ENSMUST00000113825	ENSMUSP00000063825,ENSMUSP00000109456	ENSMUSG00000024892,ENSMUSG00000024892	1390.89	1131.32	1650.46	0.544457	1.46204e-08	8.59492e-06
ENSMUSG00000044641	chr2	168081004	168101203	+	Pard6b	protein_coding	Q9JK83 A2ANX8 Q8R3J8	PAR6B_MOUSE	Partitioning defective 6 homolog beta	Pard6b Par6b	ENSMUST00000052125	ENSMUSP00000052619	ENSMUSG00000044641	1179.21	960.97	1397.45	0.539762	7.64177e-09	6.39793e-06
ENSMUSG00000048489	chr6	116650684	116652847	+	8430408G22Rik	protein_coding	Q8K2F3 Q8BU66	DEPP_MOUSE	Protein DEPP	Depp Fseg	ENSMUST00000067354 ENSMUST00000178241	ENSMUSP00000070203	ENSMUSG00000048489	1261.39	1028.53	1494.24	0.538388	2.73013e-06	0.000495245
ENSMUSG00000067924	chrX	53669177	53670408	-	Cxx1b	protein_coding	Q9D1F0	Q9D1F0_MOUSE	CAAX box 1 homolog A (Human) CAAX box 1 homolog B (Human) MCG1026783 Protein Cxx1a Protein Cxx1b	Cxx1a Cxx1b mCG_1026783	ENSMUST00000088778 ENSMUST00000088779	ENSMUSP00000086157	ENSMUSG00000067924	520.169	424.086	616.252	0.538105	5.63268e-05	0.00475241
ENSMUSG00000004655	chr6	55336432	55348555	+	Aqp1	protein_coding	Q02013 Q542P1 Q91VY8	AQP1_MOUSE	Aquaporin-1	Aqp1	ENSMUST00000004774	ENSMUSP00000004774	ENSMUSG00000004655	6898.33	5632.71	8163.95	0.535359	0.0015657	0.0496823
ENSMUSG00000031488	chr8	27138773	27174646	-	Rab11fip1	protein_coding	E9Q8L9,Q9D620 Q05A58 Q3UBC2 Q8BN24	E9Q8L9_MOUSE,RFIP1_MOUSE	Rab11 family-interacting protein 1,Rab11 family-interacting protein 1	Rab11fip1,Rab11fip1 Rcp	ENSMUST00000054212,ENSMUST00000033878	ENSMUSP00000058042,ENSMUSP00000033878	ENSMUSG00000031488,ENSMUSG00000031488	811.793	662.899	960.688	0.534604	8.93637e-07	0.000206943
ENSMUSG00000030406	chr7	19157125	19166127	-	Gipr	protein_coding	Q0P543 Q80UB4	GIPR_MOUSE	Gastric inhibitory polypeptide receptor	Gipr	ENSMUST00000094790	ENSMUSP00000092384	ENSMUSG00000030406	417.604	340.951	494.257	0.534387	0.000691656	0.0294062
ENSMUSG00000026875	chr2	34941750	34961772	-	Traf1	protein_coding	P39428 Q8CE28	TRAF1_MOUSE	TNF receptor-associated factor 1	Traf1	ENSMUST00000028234 ENSMUST00000113064 ENSMUST00000172159	ENSMUSP00000028234	ENSMUSG00000026875	569.882	465.433	674.332	0.533927	0.000144329	0.00918644
ENSMUSG00000028699	chr4	116161869	116167601	-	Tspan1	protein_coding	Q99J59 A6PW93	TSN1_MOUSE	Tetraspanin-1	Tspan1	ENSMUST00000030465	ENSMUSP00000030465	ENSMUSG00000028699	715.353	584.575	846.132	0.532734	6.39038e-06	0.000903285
ENSMUSG00000039131	chr3	152093533	152166230	-	Gipc2	protein_coding	Q9Z2H7 Q9CVG2	GIPC2_MOUSE	PDZ domain-containing protein GIPC2	Gipc2 Semcap2	ENSMUST00000046614	ENSMUSP00000037328	ENSMUSG00000039131	337.054	275.638	398.47	0.53009	0.000819613	0.0330132
ENSMUSG00000000216	chr7	121734479	121768475	+	Scnn1g	protein_coding	Q9WU39	SCNNG_MOUSE	Amiloride-sensitive sodium channel subunit gamma	Scnn1g	ENSMUST00000000221	ENSMUSP00000000221	ENSMUSG00000000216	1027.7	841.447	1213.95	0.528235	1.12841e-07	4.09387e-05
ENSMUSG00000032380	chr9	66158223	66272242	+	Dapk2	protein_coding	F6YX98,Q8VDF3 O88861 Q9QYM4	F6YX98_MOUSE,DAPK2_MOUSE	Death-associated protein kinase 2,Death-associated protein kinase 2	Dapk2,Dapk2	ENSMUST00000132987,ENSMUST00000034944	ENSMUSP00000117134,ENSMUSP00000034944	ENSMUSG00000032380,ENSMUSG00000032380	688.838	564.261	813.414	0.526845	8.62387e-05	0.00656379
ENSMUSG00000020826	chr11	78920787	78960254	+	Nos2	protein_coding	P29477 O70515 O70516 Q5SXT3 Q6P6A0 Q8R410	NOS2_MOUSE	Nitric oxide synthase, inducible	Nos2 Inosl	ENSMUST00000018610	ENSMUSP00000018610	ENSMUSG00000020826	413.209	338.822	487.596	0.523861	0.000283081	0.0150039
ENSMUSG00000030739	chr7	44605803	44670843	-	Myh14	protein_coding	D3Z5V8,K3W4R2,Q6URW6 B3F3T1 Q80V64 Q80ZE6	D3Z5V8_MOUSE,K3W4R2_MOUSE,MYH14_MOUSE	Myosin-14,Myosin-14,Myosin-14	Myh14,Myh14,Myh14	ENSMUST00000148487,ENSMUST00000107900,ENSMUST00000048102 ENSMUST00000107899 ENSMUST00000182648	ENSMUSP00000117143,ENSMUSP00000103532,ENSMUSP00000046059	ENSMUSG00000030739,ENSMUSG00000030739,ENSMUSG00000030739	5579.5	4587.32	6571.68	0.518515	5.76642e-17	2.09206e-13
ENSMUSG00000021453	chr13	51846678	51848468	+	Gadd45g	protein_coding	Q9R0S0	Q9R0S0_MOUSE	GADD45G Growth arrest and DNA damage-inducible protein GADD45 gamma Growth arrest and DNA-damage-inducible 45 gamma, isoform CRA_b OIG37	Gadd45g oig37 mCG_3413	ENSMUST00000021903	ENSMUSP00000021903	ENSMUSG00000021453	1229.79	1012.19	1447.39	0.515548	7.16224e-06	0.00097316
ENSMUSG00000007097	chr1	172271709	172298064	-	Atp1a2	protein_coding	D3YVX6,D3YYN7,Q6PIE5 Q80UZ8	D3YVX6_MOUSE,D3YYN7_MOUSE,AT1A2_MOUSE	Sodium/potassium-transporting ATPase subunit alpha-2,Sodium/potassium-transporting ATPase subunit alpha-2,Sodium/potassium-transporting ATPase subunit alpha-2	Atp1a2,Atp1a2,Atp1a2	ENSMUST00000137679,ENSMUST00000097464,ENSMUST00000085913	ENSMUSP00000117873,ENSMUSP00000095072,ENSMUSP00000083077	ENSMUSG00000007097,ENSMUSG00000007097,ENSMUSG00000007097	686.576	566.971	806.18	0.507073	3.39438e-05	0.00315765
ENSMUSG00000027533	chr3	10012548	10016607	+	Fabp5	protein_coding	Q05816	FABP5_MOUSE	Fatty acid-binding protein, epidermal	Fabp5 Fabpe Klbp Mal1	ENSMUST00000029046	ENSMUSP00000029046	ENSMUSG00000027533	1505.26	1244.79	1765.73	0.504024	1.98535e-07	6.54805e-05
ENSMUSG00000042429	chr1	134199223	134235431	-	Adora1	protein_coding	Q60612 Q8BGU7 Q9WUF9	AA1R_MOUSE	Adenosine receptor A1	Adora1	ENSMUST00000038191 ENSMUST00000086465 ENSMUST00000169927	ENSMUSP00000043522	ENSMUSG00000042429	522.44	432.659	612.221	0.499846	0.000219069	0.0123541
ENSMUSG00000042750	chrX	136066564	136068236	-	Bex2	protein_coding	Q9WTZ8	BEX2_MOUSE	Protein BEX2	Bex2	ENSMUST00000049130	ENSMUSP00000043113	ENSMUSG00000042750	574.724	476.281	673.167	0.498268	0.000478612	0.0225507
ENSMUSG00000038156	chr7	113765998	114043370	+	Spon1	protein_coding	Q3UYD7,Q8VCC9 Q8K2Q8	Q3UYD7_MOUSE,SPON1_MOUSE	Spondin-1,Spondin-1	Spon1,Spon1	ENSMUST00000084696,ENSMUST00000046687	ENSMUSP00000081746,ENSMUSP00000041157	ENSMUSG00000038156,ENSMUSG00000038156	1314.87	1094.19	1535.54	0.488508	3.81821e-06	0.000620259
ENSMUSG00000057963	chr12	102568582	102704930	-	Itpk1	protein_coding	J3QNS2,J3QPF8,Q8BYN3 Q8K0J6 Q8R0Z0	J3QNS2_MOUSE,J3QPF8_MOUSE,ITPK1_MOUSE	Inositol-tetrakisphosphate 1-kinase,Inositol-tetrakisphosphate 1-kinase,Inositol-tetrakisphosphate 1-kinase	Itpk1,Itpk1,Itpk1	ENSMUST00000179210,ENSMUST00000178697,ENSMUST00000046518	ENSMUSP00000136931,ENSMUSP00000137275,ENSMUSP00000046027	ENSMUSG00000057963,ENSMUSG00000057963,ENSMUSG00000057963	435.384	362.419	508.348	0.487019	0.000887461	0.0341312
ENSMUSG00000027858	chr3	102734529	102801513	+	Tspan2	protein_coding	Q922J6 Q543K4 Q9D397,Q9D1X8	TSN2_MOUSE,Q9D1X8_MOUSE	Tetraspanin-2,Tetraspanin 2, isoform CRA_b Tetraspanin-2	Tspan2,Tspan2 mCG_6403	ENSMUST00000029451,ENSMUST00000119902	ENSMUSP00000029451,ENSMUSP00000113803	ENSMUSG00000027858,ENSMUSG00000027858	2379.53	1981.96	2777.09	0.48644	6.89598e-08	2.77984e-05
ENSMUSG00000029829	chr6	38109255	38115809	+	Tmem213	protein_coding	Q08EA8 Q9D1U9	TM213_MOUSE	Transmembrane protein 213	Tmem213	ENSMUST00000031851	ENSMUSP00000031851	ENSMUSG00000029829	891.959	743.139	1040.78	0.485406	2.13929e-05	0.00220425
ENSMUSG00000031765	chr8	94179089	94180325	+	Mt1	protein_coding	P02802 Q64485	MT1_MOUSE	Metallothionein-1	Mt1	ENSMUST00000034215	ENSMUSP00000034215	ENSMUSG00000031765	761.9	635.305	888.494	0.483266	4.99197e-05	0.00431211
ENSMUSG00000056370	chr6	72304610	72314371	+	Sftpb	protein_coding	F8WGK6,S4R1N7,S4R239,S4R2L6	F8WGK6_MOUSE,S4R1N7_MOUSE,S4R239_MOUSE,S4R2L6_MOUSE	Pulmonary surfactant-associated protein B,Pulmonary surfactant-associated protein B,Pulmonary surfactant-associated protein B,Pulmonary surfactant-associated protein B	Sftpb,Sftpb,Sftpb,Sftpb	ENSMUST00000070437,ENSMUST00000182765,ENSMUST00000182014 ENSMUST00000183278,ENSMUST00000183018	ENSMUSP00000066805,ENSMUSP00000138298,ENSMUSP00000138204,ENSMUSP00000138695	ENSMUSG00000056370,ENSMUSG00000056370,ENSMUSG00000056370,ENSMUSG00000056370	17337	14494.1	20179.9	0.477426	8.53369e-18	4.64403e-14
ENSMUSG00000063354	chr15	76612385	76616852	-	Slc39a4	protein_coding	Q78IQ7 Q8CHL4	S39A4_MOUSE	Zinc transporter ZIP4	Slc39a4 Zip4	ENSMUST00000073428	ENSMUSP00000073134	ENSMUSG00000063354	671.877	562.028	781.726	0.4753	0.000292598	0.0151649
ENSMUSG00000025153	chr11	120805940	120824178	-	Fasn	protein_coding	P19096 B1ATU8 Q6PB72 Q8C4Z0 Q9EQR0	FAS_MOUSE	Fatty acid synthase	Fasn	ENSMUST00000055655	ENSMUSP00000052872	ENSMUSG00000025153	8618.91	7213.04	10024.8	0.474835	5.66628e-14	1.02786e-10
ENSMUSG00000003500	chr6	29200434	29216364	-	Impdh1	protein_coding	E0CXK0,E0CYE2,E0CZC7,F6XXH9,F7DEU6,P50096 Q7TSG7	E0CXK0_MOUSE,E0CYE2_MOUSE,E0CZC7_MOUSE,F6XXH9_MOUSE,F7DEU6_MOUSE,IMDH1_MOUSE	Inosine-5'-monophosphate dehydrogenase 1,Inosine-5'-monophosphate dehydrogenase,Inosine-5'-monophosphate dehydrogenase 1,Inosine-5'-monophosphate dehydrogenase 1,Inosine-5'-monophosphate dehydrogenase,Inosine-5'-monophosphate dehydrogenase 1	Impdh1,Impdh1 Impdh,Impdh1,Impdh1,Impdh1,Impdh1	ENSMUST00000162215,ENSMUST00000160878,ENSMUST00000160749,ENSMUST00000162242,ENSMUST00000162739,ENSMUST00000078155 ENSMUST00000159124 ENSMUST00000162099	ENSMUSP00000125235,ENSMUSP00000124269,ENSMUSP00000125488,ENSMUSP00000123981,ENSMUSP00000125077,ENSMUSP00000077289	ENSMUSG00000003500,ENSMUSG00000003500,ENSMUSG00000003500,ENSMUSG00000003500,ENSMUSG00000003500,ENSMUSG00000003500	1044.92	875.081	1214.76	0.472723	9.02847e-06	0.00110411
ENSMUSG00000023067	chr17	29090979	29100722	+	Cdkn1a	protein_coding	P39689	CDN1A_MOUSE	Cyclin-dependent kinase inhibitor 1	Cdkn1a Cip1 Waf1	ENSMUST00000023829 ENSMUST00000119901 ENSMUST00000122348	ENSMUSP00000023829	ENSMUSG00000023067	388.382	325.506	451.258	0.470036	0.00131136	0.0443257
ENSMUSG00000024084	chr17	79051906	79090243	+	Qpct	protein_coding	Q9CYK2 Q8BH20 Q8VE07	QPCT_MOUSE	Glutaminyl-peptide cyclotransferase	Qpct	ENSMUST00000040789	ENSMUSP00000038732	ENSMUSG00000024084	536.134	450.546	621.722	0.463716	0.000928723	0.0352041
ENSMUSG00000043621	chr4	138709837	138737167	-	Ubxn10	protein_coding	Q8BG34 Q3TTR1 Q8BP58 Q8R0B6	UBX10_MOUSE	UBX domain-containing protein 10	Ubxn10 Ubxd3	ENSMUST00000105809 ENSMUST00000105810 ENSMUST00000105811 ENSMUST00000146415	ENSMUSP00000101435	ENSMUSG00000043621	445.719	374.789	516.65	0.462052	0.00147568	0.0480034
ENSMUSG00000052974	chr7	27119909	27133660	+	Cyp2f2	protein_coding	P33267	CP2F2_MOUSE	Cytochrome P450 2F2	Cyp2f2 Cyp2f-2	ENSMUST00000003100	ENSMUSP00000003100	ENSMUSG00000052974	2047.39	1723.74	2371.04	0.459751	1.61181e-08	8.77146e-06
ENSMUSG00000059895	chr15	73723145	73758766	+	Ptp4a3	protein_coding	E9PXS4,Q9D658 O70275 Q3T9Z5 Q9CTC8	E9PXS4_MOUSE,TP4A3_MOUSE	Protein tyrosine phosphatase type IVA 3,Protein tyrosine phosphatase type IVA 3	Ptp4a3,Ptp4a3 Prl3	ENSMUST00000167582,ENSMUST00000053232 ENSMUST00000163582 ENSMUST00000165541	ENSMUSP00000131036,ENSMUSP00000060956	ENSMUSG00000059895,ENSMUSG00000059895	2841.58	2400.16	3283.01	0.451728	6.74438e-07	0.000163124
ENSMUSG00000022964	chr16	91574503	91597800	-	Tmem50b	protein_coding	D6RH99,D6RJK9,Q9D1X9 Q3UZ98 Q8N7M9	D6RH99_MOUSE,D6RJK9_MOUSE,TM50B_MOUSE	Transmembrane protein 50B,Transmembrane protein 50B,Transmembrane protein 50B	Tmem50b,Tmem50b,Tmem50b	ENSMUST00000141885,ENSMUST00000133180,ENSMUST00000023686	ENSMUSP00000116602,ENSMUSP00000120087,ENSMUSP00000023686	ENSMUSG00000022964,ENSMUSG00000022964,ENSMUSG00000022964	1966.43	1665.33	2267.53	0.445088	1.27035e-06	0.000288053
ENSMUSG00000051669	chr16	5211828	5222299	-	AU021092	protein_coding	Q3UST5 B7ZWC6	CP089_MOUSE	UPF0764 protein C16orf89 homolog		ENSMUST00000050160	ENSMUSP00000058860	ENSMUSG00000051669	3511.63	2974.12	4049.14	0.445025	1.41768e-07	4.97742e-05
ENSMUSG00000047040	chr11	96928104	96937830	+	Prr15l	protein_coding	Q8JZM2 Q8C307	PR15L_MOUSE	Proline-rich protein 15-like protein	Prr15l Atad4	ENSMUST00000054311 ENSMUST00000062172 ENSMUST00000107633 ENSMUST00000107636	ENSMUSP00000056614	ENSMUSG00000047040	1096.39	928.881	1263.89	0.443897	2.04437e-05	0.00213951
ENSMUSG00000030681	chr7	126986860	127014621	-	Mvp	protein_coding	D3Z2N7,E9Q3X0	D3Z2N7_MOUSE,E9Q3X0_MOUSE	Major vault protein,Major vault protein	Mvp,Mvp	ENSMUST00000133172,ENSMUST00000165096	ENSMUSP00000119213,ENSMUSP00000127250	ENSMUSG00000030681,ENSMUSG00000030681	654.647	555.026	754.267	0.441834	0.000324637	0.0163926
ENSMUSG00000037405	chr9	21015960	21028797	+	Icam1	protein_coding	P13597 Q61828	ICAM1_MOUSE	Intercellular adhesion molecule 1	Icam1 Icam-1	ENSMUST00000086399	ENSMUSP00000083587	ENSMUSG00000037405	3518.28	2986.02	4050.55	0.439767	3.84367e-10	4.64828e-07
ENSMUSG00000021313	chr13	11553103	12106945	-	Ryr2	protein_coding	E9Q401 O70181 Q62174 Q62197 Q9ERN6,F6U7V1	RYR2_MOUSE,F6U7V1_MOUSE	Ryanodine receptor 2,Ryanodine receptor 2	Ryr2,Ryr2	ENSMUST00000021750,ENSMUST00000170156	ENSMUSP00000021750,ENSMUSP00000127991	ENSMUSG00000021313,ENSMUSG00000021313	595.734	505.739	685.729	0.438499	0.000333375	0.0165683
ENSMUSG00000032548	chr9	102988712	103096002	+	Slco2a1	protein_coding	Q9EPT5	SO2A1_MOUSE	Solute carrier organic anion transporter family member 2A1	Slco2a1 Oatp2a1 Slc21a2	ENSMUST00000035148	ENSMUSP00000035148	ENSMUSG00000032548	2227.82	1895.18	2560.46	0.433868	5.09213e-08	2.21691e-05
ENSMUSG00000024810	chr19	29925114	29960718	+	Il33	protein_coding	D3Z6T7,H3BKB5,H3BLN5,Q8BVZ5 Q2YEJ4 Q3TQN0 Q99L46	D3Z6T7_MOUSE,H3BKB5_MOUSE,H3BLN5_MOUSE,IL33_MOUSE	Interleukin-33,Interleukin-33,Interleukin-33,Interleukin-33	Il33,Il33,Il33,Il33	ENSMUST00000144528,ENSMUST00000136850,ENSMUST00000177518,ENSMUST00000025724 ENSMUST00000120388	ENSMUSP00000122319,ENSMUSP00000135324,ENSMUSP00000135854,ENSMUSP00000025724	ENSMUSG00000024810,ENSMUSG00000024810,ENSMUSG00000024810,ENSMUSG00000024810	488.66	415.748	561.572	0.432862	0.0010947	0.0394528
ENSMUSG00000026971	chr2	60598292	60722643	-	Itgb6	protein_coding	B1AYG6,B1AYG7,Q9Z0T9 Q544J9	B1AYG6_MOUSE,B1AYG7_MOUSE,ITB6_MOUSE	Integrin beta,Integrin beta,Integrin beta-6	Itgb6,Itgb6,Itgb6	ENSMUST00000112517,ENSMUST00000154764,ENSMUST00000028348 ENSMUST00000059888	ENSMUSP00000108136,ENSMUSP00000117815,ENSMUSP00000028348	ENSMUSG00000026971,ENSMUSG00000026971,ENSMUSG00000026971	1088.29	927.094	1249.48	0.43014	0.000136634	0.00879953
ENSMUSG00000003032	chr4	55527143	55532466	-	Klf4	protein_coding	B7ZCH1,B7ZCH2,Q60793 P70421 Q3U2D6 Q3URS6 Q78K30 Q9R255	B7ZCH1_MOUSE,B7ZCH2_MOUSE,KLF4_MOUSE	Krueppel-like factor 4,Krueppel-like factor 4,Krueppel-like factor 4	Klf4,Klf4,Klf4 Ezf Gklf Zie	ENSMUST00000132746,ENSMUST00000129250,ENSMUST00000107619	ENSMUSP00000123687,ENSMUSP00000116514,ENSMUSP00000103245	ENSMUSG00000003032,ENSMUSG00000003032,ENSMUSG00000003032	903.834	770.205	1037.46	0.429261	7.00206e-05	0.0055628
ENSMUSG00000069601	chr10	69533772	70027438	+	Ank3	protein_coding	G3X971,G5E8K2,G5E8K3,G5E8K5 G5E8K4 O08866 O08867 Q3TSJ8 Q4U205 Q4U206 Q4U256 Q4U260 Q61305 Q61306 Q61307 Q61308 Q61309 Q61310 Q8CBN3 Q8VC68,Q3UVY0,S4R162,S4R165,S4R187,S4R1S2,S4R1U4,S4R1X7,S4R208,S4R229,S4R236,S4R278,S4R2C1,S4R2F5,S4R2J6,S4R2K9,S4R2S8,W4VSQ0	G3X971_MOUSE,G5E8K2_MOUSE,G5E8K3_MOUSE,ANK3_MOUSE,Q3UVY0_MOUSE,S4R162_MOUSE,S4R165_MOUSE,S4R187_MOUSE,S4R1S2_MOUSE,S4R1U4_MOUSE,S4R1X7_MOUSE,S4R208_MOUSE,S4R229_MOUSE,S4R236_MOUSE,S4R278_MOUSE,S4R2C1_MOUSE,S4R2F5_MOUSE,S4R2J6_MOUSE,S4R2K9_MOUSE,S4R2S8_MOUSE,W4VSQ0_MOUSE	Ankyrin 3, epithelial, isoform CRA_i Ankyrin-3,Ankyrin 3, epithelial, isoform CRA_l Ankyrin-3,Ankyrin 3, epithelial, isoform CRA_b Ankyrin-3,Ankyrin-3,Ankyrin-3,Ankyrin-3,Ankyrin-3,Ankyrin-3,Ankyrin-3,Ankyrin-3,Ankyrin-3,Ankyrin-3,Ankyrin-3,Ankyrin-3,Ankyrin-3,Ankyrin-3,Ankyrin-3,Ankyrin-3,Ankyrin-3,Ankyrin-3,Ankyrin 3, epithelial, isoform CRA_d Ankyrin-3	Ank3 mCG_14429,Ank3 mCG_14429,Ank3 mCG_14429,Ank3,Ank3,Ank3,Ank3,Ank3,Ank3,Ank3,Ank3,Ank3,Ank3,Ank3,Ank3,Ank3,Ank3,Ank3,Ank3,Ank3,Ank3 mCG_14429	ENSMUST00000047061 ENSMUST00000182439,ENSMUST00000092431,ENSMUST00000092432,ENSMUST00000054167 ENSMUST00000092433 ENSMUST00000092434 ENSMUST00000181974 ENSMUST00000182029 ENSMUST00000182155 ENSMUST00000182884,ENSMUST00000182557,ENSMUST00000183082,ENSMUST00000183261,ENSMUST00000182269,ENSMUST00000183169,ENSMUST00000182683,ENSMUST00000182795,ENSMUST00000183023,ENSMUST00000183240,ENSMUST00000182972,…	ENSMUSP00000045834,ENSMUSP00000090087,ENSMUSP00000090088,ENSMUSP00000061698,ENSMUSP00000138603,ENSMUSP00000138092,ENSMUSP00000138095,ENSMUSP00000138123,ENSMUSP00000138348,ENSMUSP00000138375,ENSMUSP00000138413,ENSMUSP00000138450,ENSMUSP00000138474,ENSMUSP00000138481,ENSMUSP00000138531,ENSMUSP00000138586,ENSMUSP00000138623,ENSMUSP00000138671,ENSMUSP00000138686,ENSMUSP00000138770,ENSMUSP00000138601	ENSMUSG00000069601,ENSMUSG00000069601,ENSMUSG00000069601,ENSMUSG00000069601,ENSMUSG00000069601,ENSMUSG00000069601,ENSMUSG00000069601,ENSMUSG00000069601,ENSMUSG00000069601,ENSMUSG00000069601,ENSMUSG00000069601,ENSMUSG00000069601,ENSMUSG00000069601,ENSMUSG00000069601,ENSMUSG00000069601,ENSMUSG00000069601,ENSMUSG00000069601,ENSMUSG00000069601,ENSMUSG00000069601,ENSMUSG00000069601,ENSMUSG00000069601	1418.39	1209.42	1627.35	0.427913	1.79572e-06	0.00034901
ENSMUSG00000039934	chr5	21186255	21315132	+	Gsap	protein_coding	Q3TCV3 Q3UV93 Q8BJR8 Q8BZR8 Q8R1Y4	GSAP_MOUSE	Gamma-secretase-activating protein	Gsap Pion	ENSMUST00000036031	ENSMUSP00000043679	ENSMUSG00000039934	716.147	611.829	820.464	0.422712	0.000286467	0.0150039
ENSMUSG00000002204	chr7	44572432	44586862	+	Napsa	protein_coding	O09043	NAPSA_MOUSE	Napsin-A	Napsa Kdap Nap	ENSMUST00000002274	ENSMUSP00000002274	ENSMUSG00000002204	3072.09	2625.57	3518.61	0.422233	8.92821e-08	3.35085e-05
ENSMUSG00000030103	chr6	108660629	108666925	+	Bhlhe40	protein_coding	E9Q2C3,O35185 P97289	E9Q2C3_MOUSE,BHE40_MOUSE	Class E basic helix-loop-helix protein 40,Class E basic helix-loop-helix protein 40	Bhlhe40,Bhlhe40 Bhlhb2 Clast5 Stra13	ENSMUST00000163617,ENSMUST00000032194	ENSMUSP00000132157,ENSMUSP00000032194	ENSMUSG00000030103,ENSMUSG00000030103	770.254	658.321	882.187	0.421737	0.000943722	0.0352972
ENSMUSG00000050335	chr14	47367751	47386160	+	Lgals3	protein_coding	D3YVT4,D3YZJ2,Q8C253	D3YVT4_MOUSE,D3YZJ2_MOUSE,Q8C253_MOUSE	Galectin-3,Galectin-3,Galectin	Lgals3,Lgals3,Lgals3 mCG_6908	ENSMUST00000144794,ENSMUST00000151405,ENSMUST00000142734 ENSMUST00000146468 ENSMUST00000150290	ENSMUSP00000114177,ENSMUSP00000118660,ENSMUSP00000118169	ENSMUSG00000050335,ENSMUSG00000050335,ENSMUSG00000050335	1982.61	1694.82	2270.4	0.421596	4.32853e-05	0.0038315
ENSMUSG00000033863	chr19	23141226	23166911	+	Klf9	protein_coding	Q8CEC4	Q8CEC4_MOUSE	Bteb1 protein Klf9 protein Krueppel-like factor 9 Kruppel-like factor 9	Klf9 Bteb1 mCG_5314	ENSMUST00000036884	ENSMUSP00000045639	ENSMUSG00000033863	907.626	776.131	1039.12	0.420521	5.05217e-05	0.00432975
ENSMUSG00000071604	chr19	23972751	24031019	-	Fam189a2	protein_coding	E9QP68	E9QP68_MOUSE	Protein FAM189A2	Fam189a2	ENSMUST00000096164	ENSMUSP00000093878	ENSMUSG00000071604	1062.53	908.831	1216.24	0.419939	2.87636e-05	0.00274617
ENSMUSG00000022018	chr14	79288756	79301645	-	Rgcc	protein_coding	Q9DBX1 Q9D0U0	RGCC_MOUSE	Regulator of cell cycle RGCC	Rgcc Rgc32	ENSMUST00000022595	ENSMUSP00000022595	ENSMUSG00000022018	1124.71	962.111	1287.31	0.419705	0.000339626	0.0167599
ENSMUSG00000029675	chr5	134702593	134747323	-	Eln	protein_coding	P54320 Q8C9L8	ELN_MOUSE	Elastin	Eln	ENSMUST00000015138	ENSMUSP00000015138	ENSMUSG00000029675	51929.6	44447.3	59411.9	0.418648	1.18855e-14	2.58723e-11
ENSMUSG00000003051	chr1	135253575	135258568	-	Elf3	protein_coding	Q3UPW2 B7ZNQ9 B9EI01 O35275	ELF3_MOUSE	ETS-related transcription factor Elf-3	Elf3 Ert Esx Jen	ENSMUST00000003135	ENSMUSP00000003135	ENSMUSG00000003051	628.562	538.09	719.034	0.41754	0.000555661	0.0252831
ENSMUSG00000042510	chr1	130731976	130744622	+	AA986860	protein_coding	Q8BI29 A2VDH0 Q4FZK7 Q8BHU5	SARG_MOUSE	Specifically androgen-regulated gene protein	Sarg	ENSMUST00000039323	ENSMUSP00000046172	ENSMUSG00000042510	1423.41	1221.48	1625.34	0.41182	3.35782e-06	0.000553735
ENSMUSG00000003617	chr3	19957054	20009145	+	Cp	protein_coding	E9PZD8,G3UWP5,G3UXD2,G3UXG1,G3UZ53,G3X8Q5,G3X9T8,Q61147 Q6P5C8	E9PZD8_MOUSE,G3UWP5_MOUSE,G3UXD2_MOUSE,G3UXG1_MOUSE,G3UZ53_MOUSE,G3X8Q5_MOUSE,G3X9T8_MOUSE,CERU_MOUSE	Ceruloplasmin,Ceruloplasmin,Ceruloplasmin,Ceruloplasmin,Ceruloplasmin,Ceruloplasmin Ceruloplasmin, isoform CRA_a,Ceruloplasmin Ceruloplasmin, isoform CRA_f,Ceruloplasmin	Cp,Cp,Cp,Cp,Cp,Cp mCG_19773,Cp mCG_19773,Cp	ENSMUST00000108329,ENSMUST00000172860,ENSMUST00000173779,ENSMUST00000173848,ENSMUST00000172605,ENSMUST00000003714 ENSMUST00000108328,ENSMUST00000108325,ENSMUST00000091309	ENSMUSP00000103965,ENSMUSP00000133374,ENSMUSP00000133643,ENSMUSP00000133676,ENSMUSP00000134347,ENSMUSP00000003714,ENSMUSP00000103961,ENSMUSP00000088857	ENSMUSG00000003617,ENSMUSG00000003617,ENSMUSG00000003617,ENSMUSG00000003617,ENSMUSG00000003617,ENSMUSG00000003617,ENSMUSG00000003617,ENSMUSG00000003617	1409.87	1209.95	1609.78	0.411619	1.98966e-05	0.00212308
ENSMUSG00000021895	chr14	27238039	27403904	+	Arhgef3	protein_coding	Q91X46 Q8CDM0 Q91VY4 Q99K14 Q9DC31	ARHG3_MOUSE	Rho guanine nucleotide exchange factor 3	Arhgef3	ENSMUST00000049206	ENSMUSP00000046486	ENSMUSG00000021895	1232.1	1057.5	1406.71	0.41134	1.26837e-05	0.00147655
ENSMUSG00000061232	chr17	33996017	34000333	-	H2-K1	protein_coding	G3UXW2,G3XA74,P01901,Q3TH01	G3UXW2_MOUSE,G3XA74_MOUSE,HA1B_MOUSE,Q3TH01_MOUSE	H-2 class I histocompatibility antigen, K-K alpha chain,H-2 class I histocompatibility antigen, K-K alpha chain,H-2 class I histocompatibility antigen, K-B alpha chain,H-2 class I histocompatibility antigen, K-K alpha chain	H2-K1,H2-K1,H2-K1 H2-K,H2-K1	ENSMUST00000173075,ENSMUST00000172760,ENSMUST00000025181,ENSMUST00000172912	ENSMUSP00000133847,ENSMUSP00000133290,ENSMUSP00000025181,ENSMUSP00000134004	ENSMUSG00000061232,ENSMUSG00000061232,ENSMUSG00000061232,ENSMUSG00000061232	1166.07	1000.92	1331.22	0.411069	4.87074e-05	0.00424105
ENSMUSG00000020681	chr11	105967945	105989964	+	Ace	protein_coding	F6QCP8,P09470 P22967 Q6GTS2	F6QCP8_MOUSE,ACE_MOUSE	Angiotensin-converting enzyme,Angiotensin-converting enzyme	Ace,Ace Dcp1	ENSMUST00000132280,ENSMUST00000001963 ENSMUST00000001964	ENSMUSP00000119826,ENSMUSP00000001963	ENSMUSG00000020681,ENSMUSG00000020681	3387.54	2909.11	3865.96	0.410127	5.80076e-08	2.42829e-05
ENSMUSG00000068614	chr2	114047282	114053548	-	Actc1	protein_coding	F6WX90,P68033 P04270	F6WX90_MOUSE,ACTC_MOUSE	Actin, alpha cardiac muscle 1,Actin, alpha cardiac muscle 1	Actc1,Actc1 Actc	ENSMUST00000149125,ENSMUST00000090269	ENSMUSP00000123370,ENSMUSP00000087736	ENSMUSG00000068614,ENSMUSG00000068614	1565.73	1344.82	1786.65	0.409579	0.000109761	0.00756098
ENSMUSG00000028434	chr4	56991972	57143437	-	Epb4,1l4b	protein_coding	A2ALK6,B1AXV1,Q9JMC8 A2ALK7	A2ALK6_MOUSE,B1AXV1_MOUSE,E41LB_MOUSE	Band 4,1-like protein 4B,Band 4,1-like protein 4B,Band 4,1-like protein 4B	Epb4,1l4b,Epb4,1l4b,Epb41l4b Ehm2 Epb4,1l4b	ENSMUST00000095076,ENSMUST00000044022,ENSMUST00000030142	ENSMUSP00000092687,ENSMUSP00000037625,ENSMUSP00000030142	ENSMUSG00000028434,ENSMUSG00000028434,ENSMUSG00000028434	919.631	790.407	1048.86	0.4077	7.54485e-05	0.00590778
ENSMUSG00000048373	chr5	43978858	43981779	-	Fgfbp1	protein_coding	O70514 Q62399	FGFP1_MOUSE	Fibroblast growth factor-binding protein 1	Fgfbp1	ENSMUST00000061299	ENSMUSP00000056900	ENSMUSG00000048373	688.587	592.034	785.139	0.406669	0.00096002	0.0357838
ENSMUSG00000020044	chr10	86300372	86349506	+	Timp3	protein_coding	E9QAB2,P39876 Q91WL9	E9QAB2_MOUSE,TIMP3_MOUSE	Metalloproteinase inhibitor 3,Metalloproteinase inhibitor 3	Timp3,Timp3 Sun Timp-3	ENSMUST00000132307,ENSMUST00000020234	ENSMUSP00000133236,ENSMUSP00000020234	ENSMUSG00000020044,ENSMUSG00000020044	8035.86	6916.63	9155.09	0.404455	1.93281e-08	1.00175e-05
ENSMUSG00000074259	chr9	59680144	59718874	+	Gramd2	protein_coding	D3YVC0,F6W980,Q3V3G7 B2RSP5 Q3V3E4	D3YVC0_MOUSE,F6W980_MOUSE,GRAM2_MOUSE	GRAM domain-containing protein 2,GRAM domain-containing protein 2,GRAM domain-containing protein 2	Gramd2,Gramd2,Gramd2	ENSMUST00000123914,ENSMUST00000129129,ENSMUST00000098661 ENSMUST00000128944	ENSMUSP00000114530,ENSMUSP00000118901,ENSMUSP00000096258	ENSMUSG00000074259,ENSMUSG00000074259,ENSMUSG00000074259	2756.46	2373.33	3139.59	0.403515	4.96259e-06	0.000781476
ENSMUSG00000025203	chr19	44293676	44306864	+	Scd2	protein_coding	P13011 Q8BH96	ACOD2_MOUSE	Acyl-CoA desaturase 2	Scd2	ENSMUST00000026221	ENSMUSP00000026221	ENSMUSG00000025203	35275.8	30420.7	40130.9	0.399647	1.01876e-08	7.3921e-06
ENSMUSG00000039450	chr11	120725399	120727281	-	Dcxr	protein_coding	A2AC16,Q91X52 Q3U5L5 Q9D129 Q9D8W1	A2AC16_MOUSE,DCXR_MOUSE	Dicarbonyl L-xylulose reductase, isoform CRA_a L-xylulose reductase,L-xylulose reductase	Dcxr mCG_2129,Dcxr	ENSMUST00000106148,ENSMUST00000026144	ENSMUSP00000101754,ENSMUSP00000026144	ENSMUSG00000039450,ENSMUSG00000039450	1253.4	1081.78	1425.02	0.397254	0.00084929	0.0332506
ENSMUSG00000054986	chr11	4064841	4077736	+	Sec14l3	protein_coding	Q5SQ27	Q5SQ27_MOUSE	MCG140354 Protein Sec14l3 SEC14-like 3 (S, cerevisiae)	Sec14l3 mCG_140354	ENSMUST00000068322	ENSMUSP00000065084	ENSMUSG00000054986	5770.21	4982.85	6557.58	0.396123	2.83963e-07	8.35313e-05
ENSMUSG00000009687	chr7	31032722	31042481	-	Fxyd5	protein_coding	E0CXM5,E0CXN1,E0CYX7,F6TWM7,F8WJA1,P97808	E0CXM5_MOUSE,E0CXN1_MOUSE,E0CYX7_MOUSE,F6TWM7_MOUSE,F8WJA1_MOUSE,FXYD5_MOUSE	FXYD domain-containing ion transport regulator 5,FXYD domain-containing ion transport regulator 5,FXYD domain-containing ion transport regulator 5,FXYD domain-containing ion transport regulator 5,FXYD domain-containing ion transport regulator 5,FXYD domain-containing ion transport regulator 5	Fxyd5,Fxyd5,Fxyd5,Fxyd5,Fxyd5,Fxyd5 Oit2	ENSMUST00000160689,ENSMUST00000162733,ENSMUST00000159753,ENSMUST00000162250,ENSMUST00000009831,ENSMUST00000159924 ENSMUST00000161684 ENSMUST00000161805 ENSMUST00000162087 ENSMUST00000162116	ENSMUSP00000125187,ENSMUSP00000125173,ENSMUSP00000123813,ENSMUSP00000124129,ENSMUSP00000009831,ENSMUSP00000124219	ENSMUSG00000009687,ENSMUSG00000009687,ENSMUSG00000009687,ENSMUSG00000009687,ENSMUSG00000009687,ENSMUSG00000009687	655.236	566.051	744.422	0.394579	0.000768659	0.0319316
ENSMUSG00000022505	chr16	10281749	10313968	-	Emp2	protein_coding	O88662	EMP2_MOUSE	Epithelial membrane protein 2	Emp2 Xmp	ENSMUST00000078357	ENSMUSP00000077466	ENSMUSG00000022505	16810.3	14527.9	19092.7	0.394167	1.5004e-08	8.59492e-06
ENSMUSG00000032202	chr9	73044854	73097629	+	Rab27a	protein_coding	Q9ERI2	RB27A_MOUSE	Ras-related protein Rab-27A	Rab27a	ENSMUST00000034722 ENSMUST00000184146	ENSMUSP00000034722	ENSMUSG00000032202	1008.19	871.451	1144.92	0.393362	0.000213356	0.0122095
ENSMUSG00000005125	chr15	66929321	66969640	-	Ndrg1	protein_coding	E9PVF3,E9PZC7,E9Q0J8,E9Q147,E9Q3F9,E9Q514,E9Q5I8,E9Q7G8,E9Q7V2,F6VLR8,Q62433 P97862	E9PVF3_MOUSE,E9PZC7_MOUSE,E9Q0J8_MOUSE,E9Q147_MOUSE,E9Q3F9_MOUSE,E9Q514_MOUSE,E9Q5I8_MOUSE,E9Q7G8_MOUSE,E9Q7V2_MOUSE,F6VLR8_MOUSE,NDRG1_MOUSE	Protein NDRG1,Protein NDRG1,Protein NDRG1,Protein NDRG1,Protein NDRG1,Protein NDRG1,Protein NDRG1,Protein NDRG1,Protein NDRG1,Protein NDRG1,Protein NDRG1	Ndrg1,Ndrg1,Ndrg1,Ndrg1,Ndrg1,Ndrg1,Ndrg1,Ndrg1,Ndrg1,Ndrg1,Ndrg1 Ndr1 Ndrl Tdd5	ENSMUST00000168979,ENSMUST00000168542,ENSMUST00000171266,ENSMUST00000164070,ENSMUST00000170903,ENSMUST00000166420,ENSMUST00000163496,ENSMUST00000172447,ENSMUST00000164675,ENSMUST00000167817,ENSMUST00000005256	ENSMUSP00000126985,ENSMUSP00000127940,ENSMUSP00000129093,ENSMUSP00000126091,ENSMUSP00000127302,ENSMUSP00000127099,ENSMUSP00000130584,ENSMUSP00000130281,ENSMUSP00000130150,ENSMUSP00000127075,ENSMUSP00000005256	ENSMUSG00000005125,ENSMUSG00000005125,ENSMUSG00000005125,ENSMUSG00000005125,ENSMUSG00000005125,ENSMUSG00000005125,ENSMUSG00000005125,ENSMUSG00000005125,ENSMUSG00000005125,ENSMUSG00000005125,ENSMUSG00000005125	1461.52	1263.52	1659.52	0.39304	0.000121818	0.00813413
ENSMUSG00000030711	chr7	126672865	126676432	-	Sult1a1	protein_coding	D3Z2P8,D3Z3G5,E9QNL5,Q91W19	D3Z2P8_MOUSE,D3Z3G5_MOUSE,E9QNL5_MOUSE,Q91W19_MOUSE	Sulfotransferase 1A1,Sulfotransferase 1A1,Sulfotransferase 1A1,Sulfotransferase 1A1 Sulfotransferase family 1A, phenol-preferring, member 1 Sulfotransferase family 1A, phenol-preferring, member 1, isoform CRA_a	Sult1a1,Sult1a1,Sult1a1,Sult1a1 mCG_141844	ENSMUST00000155419,ENSMUST00000106371,ENSMUST00000106373,ENSMUST00000106372	ENSMUSP00000121514,ENSMUSP00000101979,ENSMUSP00000101981,ENSMUSP00000101980	ENSMUSG00000030711,ENSMUSG00000030711,ENSMUSG00000030711,ENSMUSG00000030711	821.918	710.572	933.264	0.392821	0.00121701	0.0425915
ENSMUSG00000057948	chr11	116062095	116077961	-	Unc13d	protein_coding	A2A855,A2A858,B2RUP2 A2A856 A3R4M4 A3R4M5 Q571J0	A2A855_MOUSE,A2A858_MOUSE,UN13D_MOUSE	Protein unc-13 homolog D,Protein unc-13 homolog D,Protein unc-13 homolog D	Unc13d,Unc13d,Unc13d	ENSMUST00000153408,ENSMUST00000156545,ENSMUST00000075036 ENSMUST00000106450 ENSMUST00000106451 ENSMUST00000173345 ENSMUST00000174822	ENSMUSP00000115327,ENSMUSP00000118266,ENSMUSP00000074549	ENSMUSG00000057948,ENSMUSG00000057948,ENSMUSG00000057948	806.958	698.092	915.824	0.391162	0.000798219	0.0327842
ENSMUSG00000021608	chr13	73467197	73516422	+	Lpcat1	protein_coding	D6RE48,D6RFA8,Q3TFD2 Q3TAX4 Q6NXZ6 Q8BG23 Q8BUX7 Q99JU6	D6RE48_MOUSE,D6RFA8_MOUSE,PCAT1_MOUSE	Lysophosphatidylcholine acyltransferase 1,Acyltransferase like 2, isoform CRA_b Lysophosphatidylcholine acyltransferase 1,Lysophosphatidylcholine acyltransferase 1	Lpcat1,Lpcat1 Aytl2 mCG_10024,Lpcat1 Aytl2	ENSMUST00000123766,ENSMUST00000147566,ENSMUST00000022099	ENSMUSP00000117965,ENSMUSP00000117238,ENSMUSP00000022099	ENSMUSG00000021608,ENSMUSG00000021608,ENSMUSG00000021608	11065.5	9585.88	12545.1	0.388106	3.68191e-08	1.74234e-05
ENSMUSG00000068874	chr3	94933056	94944758	+	Selenbp1	protein_coding	D6RHN2,P17563 Q91X87	D6RHN2_MOUSE,SBP1_MOUSE	Selenium-binding protein 1,Selenium-binding protein 1	Selenbp1,Selenbp1 Lpsb	ENSMUST00000134202 ENSMUST00000140757 ENSMUST00000153720,ENSMUST00000090839	ENSMUSP00000120159,ENSMUSP00000088349	ENSMUSG00000068874,ENSMUSG00000068874	5906.02	5116.97	6695.07	0.387743	2.24843e-06	0.000429332
ENSMUSG00000020108	chr10	59949675	59951770	-	Ddit4	protein_coding	Q9D3F7	DDIT4_MOUSE	DNA damage-inducible transcript 4 protein	Ddit4 Dig2 Redd1 Rtp801	ENSMUST00000020308	ENSMUSP00000020308	ENSMUSG00000020108	1600.4	1388.39	1812.4	0.384246	7.86359e-06	0.00103117
ENSMUSG00000024066	chr17	73883908	73950182	-	Xdh	protein_coding	Q00519 E9QLM9	XDH_MOUSE	Xanthine dehydrogenase/oxidase	Xdh	ENSMUST00000024866	ENSMUSP00000024866	ENSMUSG00000024066	1091.62	947.358	1235.88	0.383196	8.376e-05	0.00642003
ENSMUSG00000031431	chrX	140539528	140600659	-	Tsc22d3	protein_coding	B1AVF2,Q9Z2S7 B1AVF3 Q3UNI6 Q8K160 Q9EQN0 Q9EQN1 Q9EQN2	B1AVF2_MOUSE,T22D3_MOUSE	TSC22 domain family protein 3,TSC22 domain family protein 3	Tsc22d3,Tsc22d3 Dsip1 Dsipi Gilz	ENSMUST00000123898,ENSMUST00000055738 ENSMUST00000112996	ENSMUSP00000123569,ENSMUSP00000062589	ENSMUSG00000031431,ENSMUSG00000031431	2513.22	2181.92	2844.52	0.382436	1.61095e-06	0.000330593
ENSMUSG00000078670	chr7	73740307	73776919	+	Fam174b	protein_coding	Q8K064 Q2NLC2	F174B_MOUSE	Membrane protein FAM174B	Fam174b	ENSMUST00000107456	ENSMUSP00000103080	ENSMUSG00000078670	1671.23	1451.03	1891.42	0.382158	1.27523e-05	0.00147655
ENSMUSG00000041247	chr16	19653381	19706365	-	Lamp3	protein_coding	Q7TST5 Q8C1F6	LAMP3_MOUSE	Lysosome-associated membrane glycoprotein 3	Lamp3	ENSMUST00000081880	ENSMUSP00000080556	ENSMUSG00000041247	8356.85	7257.15	9456.55	0.381864	3.1576e-07	9.04404e-05
ENSMUSG00000026574	chr1	164796644	164824266	+	Dpt	protein_coding	Q9QZZ6 Q9D2B6	DERM_MOUSE	Dermatopontin	Dpt	ENSMUST00000027861	ENSMUSP00000027861	ENSMUSG00000026574	1948.57	1692.52	2204.62	0.381162	0.000252978	0.0136986
ENSMUSG00000021057	chr12	76324891	76334153	+	Akap5	protein_coding	D3YVF0 D3Z5C9,H3BIV5	AKAP5_MOUSE,H3BIV5_MOUSE	A-kinase anchor protein 5,A-kinase anchor protein 5	Akap5 Akap150,Akap5	ENSMUST00000154078,ENSMUST00000095610 ENSMUST00000172992	ENSMUSP00000114495,ENSMUSP00000093270	ENSMUSG00000021057,ENSMUSG00000021057	14193.5	12330.2	16056.7	0.38095	2.59313e-09	2.82237e-06
ENSMUSG00000030351	chr6	127887589	127953977	+	Tspan11	protein_coding	Q9D1D1	TSN11_MOUSE	Tetraspanin-11	Tspan11	ENSMUST00000032501	ENSMUSP00000032501	ENSMUSG00000030351	1068.7	928.493	1208.91	0.380379	0.000294297	0.0151807
ENSMUSG00000027315	chr2	119237362	119249527	+	Spint1	protein_coding	Q9R097 Q99J04	SPIT1_MOUSE	Kunitz-type protease inhibitor 1	Spint1 Hai1	ENSMUST00000028783 ENSMUST00000110816 ENSMUST00000110817	ENSMUSP00000028783	ENSMUSG00000027315	1159.26	1007.96	1310.57	0.378416	9.25373e-05	0.00676634
ENSMUSG00000001025	chr3	90612882	90624181	+	S100a6	protein_coding	P14069	S10A6_MOUSE	Protein S100-A6	S100a6 Cacy	ENSMUST00000001051	ENSMUSP00000001051	ENSMUSG00000001025	1307.67	1137.38	1477.97	0.377611	0.00143896	0.0471735
ENSMUSG00000029484	chr5	96793339	96845966	+	Anxa3	protein_coding	O35639 Q3UBI0	ANXA3_MOUSE	Annexin A3	Anxa3 Anx3	ENSMUST00000031447	ENSMUSP00000031447	ENSMUSG00000029484	5605.45	4876.21	6334.69	0.377445	3.10683e-06	0.000520227
ENSMUSG00000073411	chr17	35262730	35267499	+	H2-D1	protein_coding	G3UX20,G3UZP7,P01899	G3UX20_MOUSE,G3UZP7_MOUSE,HA11_MOUSE	H-2 class I histocompatibility antigen, D-P alpha chain,H-2 class I histocompatibility antigen, D-P alpha chain,H-2 class I histocompatibility antigen, D-B alpha chain	H2-D1,H2-D1,H2-D1	ENSMUST00000173167,ENSMUST00000172503,ENSMUST00000172785	ENSMUSP00000133518,ENSMUSP00000134582,ENSMUSP00000134570	ENSMUSG00000073411,ENSMUSG00000073411,ENSMUSG00000073411	1920.26	1670.93	2169.59	0.376571	1.77343e-05	0.00196959
ENSMUSG00000028583	chr4	143267431	143299564	-	Pdpn	protein_coding	A8Y5F6,Q62011 A2A8J3 Q546R8 Q61612	A8Y5F6_MOUSE,PDPN_MOUSE	Podoplanin,Podoplanin	Pdpn,Pdpn Gp38 Ots8	ENSMUST00000119654,ENSMUST00000030317 ENSMUST00000181754	ENSMUSP00000113776,ENSMUSP00000030317	ENSMUSG00000028583,ENSMUSG00000028583	1718.1	1496.5	1939.71	0.374027	2.45043e-05	0.00246949
ENSMUSG00000023915	chr17	43016555	43089188	+	Tnfrsf21	protein_coding	Q9EPU5 Q3UYG3 Q543Y9 Q91W77 Q91XH9	TNR21_MOUSE	Tumor necrosis factor receptor superfamily member 21	Tnfrsf21 Dr6	ENSMUST00000024708	ENSMUSP00000024708	ENSMUSG00000023915	1565.8	1364.75	1766.84	0.372296	1.94792e-05	0.00211358
ENSMUSG00000042784	chr3	89229057	89233381	+	Muc1	protein_coding	Q02496	MUC1_MOUSE	Mucin-1	Muc1 Muc-1	ENSMUST00000041142	ENSMUSP00000041963	ENSMUSG00000042784	5175.02	4512.2	5837.84	0.371529	2.5706e-08	1.27175e-05
ENSMUSG00000040280	chr10	127514939	127517152	+	Ndufa4l2	protein_coding	Q4FZG9	NUA4L_MOUSE	NADH dehydrogenase [ubiquinone] 1 alpha subcomplex subunit 4-like 2	Ndufa4l2	ENSMUST00000035735	ENSMUSP00000042185	ENSMUSG00000040280	1237.6	1079.14	1396.06	0.371169	8.71093e-05	0.00658401
ENSMUSG00000040631	chr8	94863828	94876312	-	Dok4	protein_coding	Q99KE3 Q3U0X3	DOK4_MOUSE	Docking protein 4	Dok4	ENSMUST00000046461	ENSMUSP00000043554	ENSMUSG00000040631	1813.2	1582.72	2043.68	0.368555	8.73152e-06	0.00107993
ENSMUSG00000008601	chr3	88542029	88548300	-	Rab25	protein_coding	D3YYB3,Q9WTL2 Q9D1P3	D3YYB3_MOUSE,RAB25_MOUSE	Ras-related protein Rab-25,Ras-related protein Rab-25	Rab25,Rab25	ENSMUST00000131775,ENSMUST00000008745	ENSMUSP00000120505,ENSMUSP00000008745	ENSMUSG00000008601,ENSMUSG00000008601	1256.27	1097.08	1415.46	0.367298	8.85141e-05	0.00662026
ENSMUSG00000025608	chr6	31519488	31563981	-	Podxl	protein_coding	Q9R0M4 Q9ESZ1	PODXL_MOUSE	Podocalyxin	Podxl Pclp1	ENSMUST00000026698	ENSMUSP00000026698	ENSMUSG00000025608	6594.5	5761.83	7427.17	0.36623	6.76918e-09	6.32411e-06
ENSMUSG00000021242	chr12	84754560	84773112	-	Npc2	protein_coding	Q9Z0J0 Q3UB23	NPC2_MOUSE	Epididymal secretory protein E1	Npc2	ENSMUST00000021668	ENSMUSP00000021668	ENSMUSG00000021242	23883.6	20875.7	26891.5	0.365311	2.36966e-07	7.39635e-05
ENSMUSG00000002504	chr17	24639282	24650305	-	Slc9a3r2	protein_coding	Q9JHL1 Q3TDR3 Q6P074 Q8BGL9 Q8BW05 Q9DCR6	NHRF2_MOUSE	Na(+)/H(+) exchange regulatory cofactor NHE-RF2	Slc9a3r2 Nherf2	ENSMUST00000002572 ENSMUST00000019684	ENSMUSP00000002572	ENSMUSG00000002504	2889.33	2525.43	3253.22	0.365209	3.82379e-07	9.67864e-05
ENSMUSG00000036256	chr5	77349240	77408041	-	Igfbp7	protein_coding	E9Q5D9,F8WH23	E9Q5D9_MOUSE,F8WH23_MOUSE	Insulin-like growth factor-binding protein 7,Insulin-like growth factor-binding protein 7	Igfbp7,Igfbp7	ENSMUST00000163898,ENSMUST00000046746	ENSMUSP00000128318,ENSMUSP00000045057	ENSMUSG00000036256,ENSMUSG00000036256	1556.22	1360.76	1751.67	0.364079	0.000121388	0.00813413
ENSMUSG00000041548	chr5	116408491	116422864	-	Hspb8	protein_coding	Q9JK92	HSPB8_MOUSE	Heat shock protein beta-8	Hspb8 Cryac Hsp22	ENSMUST00000036991	ENSMUSP00000037007	ENSMUSG00000041548	1080.91	945.244	1216.58	0.363733	0.000412625	0.0197842
ENSMUSG00000026879	chr2	35256380	35307892	+	Gsn	protein_coding	A6PWS5,P13020 Q3UPB1 Q8R590	A6PWS5_MOUSE,GELS_MOUSE	Gelsolin,Gelsolin	Gsn,Gsn Gsb	ENSMUST00000142324,ENSMUST00000028239	ENSMUSP00000118120,ENSMUSP00000028239	ENSMUSG00000026879,ENSMUSG00000026879	8778.15	7685.67	9870.63	0.360929	3.76739e-07	9.67864e-05
ENSMUSG00000026639	chr1	193207699	193343878	+	Lamb3	protein_coding	Q61087 Q91V90	LAMB3_MOUSE	Laminin subunit beta-3	Lamb3	ENSMUST00000016315 ENSMUST00000159955	ENSMUSP00000016315	ENSMUSG00000026639	2683.3	2349.94	3016.66	0.360192	7.63721e-07	0.000180703
ENSMUSG00000062609	chr16	95257558	95300260	+	Kcnj15	protein_coding	D3YV68,D3YVH1,D3YXQ3,D3Z370,O88932 Q9JK34,Q3TNE6	D3YV68_MOUSE,D3YVH1_MOUSE,D3YXQ3_MOUSE,D3Z370_MOUSE,KCJ15_MOUSE,Q3TNE6_MOUSE	ATP-sensitive inward rectifier potassium channel 15,ATP-sensitive inward rectifier potassium channel 15,ATP-sensitive inward rectifier potassium channel 15,ATP-sensitive inward rectifier potassium channel 15,ATP-sensitive inward rectifier potassium channel 15,ATP-sensitive inward rectifier potassium channel 15 Potassium inwardly-rectifying channel, subfamily J, member 15	Kcnj15,Kcnj15,Kcnj15,Kcnj15,Kcnj15,Kcnj15	ENSMUST00000125847,ENSMUST00000140222,ENSMUST00000134166,ENSMUST00000138329,ENSMUST00000113854 ENSMUST00000113855 ENSMUST00000113856,ENSMUST00000037154 ENSMUST00000113858 ENSMUST00000113859 ENSMUST00000113861 ENSMUST00000113862	ENSMUSP00000114646,ENSMUSP00000114449,ENSMUSP00000118992,ENSMUSP00000117744,ENSMUSP00000109485,ENSMUSP00000045218	ENSMUSG00000062609,ENSMUSG00000062609,ENSMUSG00000062609,ENSMUSG00000062609,ENSMUSG00000062609,ENSMUSG00000062609	1323.1	1159.09	1487.11	0.359242	0.00013036	0.00854723
ENSMUSG00000045294	chr5	28071363	28078662	+	Insig1	protein_coding	Q8BGI3 A2RSM6 Q3UAX9 Q3UX30	INSI1_MOUSE	Insulin-induced gene 1 protein	Insig1	ENSMUST00000059155	ENSMUSP00000061877	ENSMUSG00000045294	1946.79	1708.5	2185.08	0.354777	3.82831e-05	0.00347228
ENSMUSG00000020911	chr11	100140810	100148665	-	Krt19	protein_coding	P19001	K1C19_MOUSE	Keratin, type I cytoskeletal 19	Krt19 Krt1-19	ENSMUST00000007317	ENSMUSP00000007317	ENSMUSG00000020911	5299.86	4659.4	5940.33	0.350333	5.18731e-06	0.000795193
ENSMUSG00000044986	chr15	78399556	78405859	-	Tst	protein_coding	P52196	THTR_MOUSE	Thiosulfate sulfurtransferase	Tst	ENSMUST00000058659	ENSMUSP00000055743	ENSMUSG00000044986	2524.39	2219.51	2829.28	0.350057	0.000174139	0.0105204
ENSMUSG00000024308	chr17	33915899	33929288	+	Tapbp	protein_coding	G3UWL0,G3UZZ2,Q3TCU5	G3UWL0_MOUSE,G3UZZ2_MOUSE,Q3TCU5_MOUSE	Tapasin,Tapasin,Tapasin	Tapbp,Tapbp,Tapbp	ENSMUST00000172489,ENSMUST00000172619,ENSMUST00000025161	ENSMUSP00000133332,ENSMUSP00000134695,ENSMUSP00000025161	ENSMUSG00000024308,ENSMUSG00000024308,ENSMUSG00000024308	1631.29	1434.45	1828.13	0.349654	6.10157e-05	0.0050569
ENSMUSG00000019066	chr9	21907491	21918192	-	Rab3d	protein_coding	D3YW33,D3YWL1,P35276	D3YW33_MOUSE,D3YWL1_MOUSE,RAB3D_MOUSE	RAB3D, member RAS oncogene family, isoform CRA_b Ras-related protein Rab-3D,Ras-related protein Rab-3D,Ras-related protein Rab-3D	Rab3d mCG_14029,Rab3d,Rab3d	ENSMUST00000119055,ENSMUST00000128442,ENSMUST00000115351 ENSMUST00000122211	ENSMUSP00000114106,ENSMUSP00000120067,ENSMUSP00000111008	ENSMUSG00000019066,ENSMUSG00000019066,ENSMUSG00000019066	1176.31	1035.27	1317.35	0.347335	0.000273312	0.0146538
ENSMUSG00000071379	chr12	17690814	17791926	+	Hpcal1	protein_coding	P62748 P35333	HPCL1_MOUSE	Hippocalcin-like protein 1	Hpcal1	ENSMUST00000071858	ENSMUSP00000071756	ENSMUSG00000071379	1915.35	1687	2143.7	0.345463	2.41617e-05	0.00245772
ENSMUSG00000035441	chr11	80482126	80780025	-	Myo1d	protein_coding	Q5SYD0 Q5SSK7 Q8BWY5	MYO1D_MOUSE	Unconventional myosin-Id	Myo1d	ENSMUST00000041065 ENSMUST00000070997	ENSMUSP00000037819	ENSMUSG00000035441	1740.71	1533.78	1947.64	0.344435	3.09626e-05	0.00290515
ENSMUSG00000018899	chr11	53770014	53778374	+	Irf1	protein_coding	A8Y5B9,D6RH71,P15314,Q3U5M1,Q5SX14,Q5SX15,Q5SX16	A8Y5B9_MOUSE,D6RH71_MOUSE,IRF1_MOUSE,Q3U5M1_MOUSE,Q5SX14_MOUSE,Q5SX15_MOUSE,Q5SX16_MOUSE	Interferon regulatory factor 1,Interferon regulatory factor 1,Interferon regulatory factor 1,Interferon regulatory factor,Interferon regulatory factor 1,Interferon regulatory factor 1,Interferon regulatory factor 1	Irf1,Irf1,Irf1,Irf1,Irf1,Irf1,Irf1	ENSMUST00000140866,ENSMUST00000142221,ENSMUST00000019043 ENSMUST00000108920,ENSMUST00000108922,ENSMUST00000123376,ENSMUST00000133291,ENSMUST00000138913	ENSMUSP00000114315,ENSMUSP00000118795,ENSMUSP00000019043,ENSMUSP00000104550,ENSMUSP00000122101,ENSMUSP00000116656,ENSMUSP00000118314	ENSMUSG00000018899,ENSMUSG00000018899,ENSMUSG00000018899,ENSMUSG00000018899,ENSMUSG00000018899,ENSMUSG00000018899,ENSMUSG00000018899	1050.84	926.806	1174.88	0.341843	0.00049113	0.0229675
ENSMUSG00000024222	chr17	28399095	28517524	-	Fkbp5	protein_coding	B8JJC2,Q64378	B8JJC2_MOUSE,FKBP5_MOUSE	Peptidyl-prolyl cis-trans isomerase,Peptidyl-prolyl cis-trans isomerase FKBP5	Fkbp5,Fkbp5 Fkbp51	ENSMUST00000153744,ENSMUST00000079413 ENSMUST00000114792 ENSMUST00000177939	ENSMUSP00000116466,ENSMUSP00000078382	ENSMUSG00000024222,ENSMUSG00000024222	2231.8	1968.57	2495.04	0.341756	8.22842e-05	0.00635164
ENSMUSG00000034159	chr1	93151349	93160948	-	2310007B03Rik	protein_coding	Q8CEZ4 Q5FWA3 Q8C4S6	CB054_MOUSE	Uncharacterized protein C2orf54 homolog		ENSMUST00000043718 ENSMUST00000143419	ENSMUSP00000035332	ENSMUSG00000034159	1112.12	980.988	1243.26	0.341511	0.0003473	0.0169507
ENSMUSG00000042842	chr13	32965209	32979067	+	Serpinb6b	protein_coding	F7B9A0,O08804	F7B9A0_MOUSE,O08804_MOUSE	Protein Serpinb6b,NK13 Protein Serpinb6b Serine (Or cysteine) peptidase inhibitor, clade B, member 6b Serine (Or cysteine) peptidase inhibitor, clade B, member 6b, isoform CRA_a	Serpinb6b,Serpinb6b mCG_17890	ENSMUST00000017184,ENSMUST00000110293	ENSMUSP00000017184,ENSMUSP00000105922	ENSMUSG00000042842,ENSMUSG00000042842	4267.7	3769.9	4765.51	0.338025	8.62046e-06	0.00107993
ENSMUSG00000041378	chr16	18776847	18778260	+	Cldn5	protein_coding	O54942 O88789	CLD5_MOUSE	Claudin-5	Cldn5 Bec1	ENSMUST00000043577	ENSMUSP00000041925	ENSMUSG00000041378	2667.69	2357.9	2977.48	0.336461	9.76936e-05	0.0070417
ENSMUSG00000032193	chr9	21723576	21749916	+	Ldlr	protein_coding	P35951 Q6GTJ9	LDLR_MOUSE	Low-density lipoprotein receptor	Ldlr	ENSMUST00000034713	ENSMUSP00000034713	ENSMUSG00000032193	2039.48	1803.67	2275.29	0.334948	0.000248855	0.0136107
ENSMUSG00000037820	chr2	158116402	158146436	-	Tgm2	protein_coding	G3UXE8,P21981 O88901 Q3TLV2 Q8C217 Q91VG9 Q9R1F7	G3UXE8_MOUSE,TGM2_MOUSE	Protein-glutamine gamma-glutamyltransferase 2,Protein-glutamine gamma-glutamyltransferase 2	Tgm2,Tgm2	ENSMUST00000174718,ENSMUST00000103122	ENSMUSP00000133662,ENSMUSP00000099411	ENSMUSG00000037820,ENSMUSG00000037820	3105.48	2747.03	3463.92	0.334425	9.00886e-05	0.00667023
ENSMUSG00000036885	chr3	62338344	62462221	+	Arhgef26	protein_coding	D3YYY8,F6TAL7	D3YYY8_MOUSE,F6TAL7_MOUSE	Protein Arhgef26,Protein Arhgef26	Arhgef26,Arhgef26	ENSMUST00000079300,ENSMUST00000161057	ENSMUSP00000078281,ENSMUSP00000124392	ENSMUSG00000036885,ENSMUSG00000036885	1616.15	1429.97	1802.33	0.33367	0.000199766	0.011627
ENSMUSG00000068323	chr6	83219828	83304945	+	Slc4a5	protein_coding	D3YVG0,D3YX36,E9Q3M5	D3YVG0_MOUSE,D3YX36_MOUSE,E9Q3M5_MOUSE	Protein Slc4a5,Protein Slc4a5,Protein Slc4a5	Slc4a5,Slc4a5,Slc4a5	ENSMUST00000039212,ENSMUST00000113899,ENSMUST00000113900	ENSMUSP00000041007,ENSMUSP00000109532,ENSMUSP00000109533	ENSMUSG00000068323,ENSMUSG00000068323,ENSMUSG00000068323	1262.02	1116.62	1407.42	0.333653	0.00154341	0.0492836
ENSMUSG00000027375	chr2	127633226	127656695	-	Mal	protein_coding	O09198 O08819 O09109 Q545Q7 Q9D2R2	MAL_MOUSE	Myelin and lymphocyte protein	Mal	ENSMUST00000028853 ENSMUST00000028854	ENSMUSP00000028853	ENSMUSG00000027375	2189.17	1938.39	2439.95	0.331844	0.000543833	0.0248701
ENSMUSG00000033595	chr14	70530821	70538323	+	Lgi3	protein_coding	Q8K406	LGI3_MOUSE	Leucine-rich repeat LGI family member 3	Lgi3	ENSMUST00000047331	ENSMUSP00000046705	ENSMUSG00000033595	6313.52	5592.16	7034.88	0.331067	3.065e-06	0.000520227
ENSMUSG00000038600	chr6	38048483	38124586	-	Atp6v0a4	protein_coding	Q920R6 Q8CJ79 Q920B5	VPP4_MOUSE	V-type proton ATPase 116 kDa subunit a isoform 4	Atp6v0a4 Atp6n1b	ENSMUST00000040259 ENSMUST00000114908	ENSMUSP00000039381	ENSMUSG00000038600	1806.51	1600.47	2012.56	0.330352	5.35427e-05	0.0045528
ENSMUSG00000026123	chr1	34849976	34879580	+	Plekhb2	protein_coding	D3Z3L2,Q9QZC7 Q3UDH6 Q8C4I4 Q8CA27	D3Z3L2_MOUSE,PKHB2_MOUSE	Pleckstrin homology domain-containing family B member 2,Pleckstrin homology domain-containing family B member 2	Plekhb2,Plekhb2 Evt2	ENSMUST00000152654,ENSMUST00000027297	ENSMUSP00000116777,ENSMUSP00000027297	ENSMUSG00000026123,ENSMUSG00000026123	1326.92	1177.72	1476.12	0.325568	0.000286734	0.0150039
ENSMUSG00000049382	chr15	101996711	102004342	-	Krt8	protein_coding	P11679 Q3KQK5 Q3TGI1 Q3TJE1 Q3TKY7 Q61463 Q61518 Q61519	K2C8_MOUSE	Keratin, type II cytoskeletal 8	Krt8 Krt2-8	ENSMUST00000023952	ENSMUSP00000023952	ENSMUSG00000049382	3830.15	3400.01	4260.3	0.325331	1.4061e-06	0.000300078
ENSMUSG00000026576	chr1	164437109	164458355	-	Atp1b1	protein_coding	P14094	AT1B1_MOUSE	Sodium/potassium-transporting ATPase subunit beta-1	Atp1b1 Atp4b	ENSMUST00000027863	ENSMUSP00000027863	ENSMUSG00000026576	6908.02	6135.13	7680.91	0.324136	3.26675e-07	9.11675e-05
ENSMUSG00000037012	chr10	62268855	62379908	-	Hk1	protein_coding	B4YB29,D3YYR4,D3Z105,D3Z365,F6QD41,G3UVV4,P17710 E9PXQ3 Q61659 Q64476 Q64479	B4YB29_MOUSE,D3YYR4_MOUSE,D3Z105_MOUSE,D3Z365_MOUSE,F6QD41_MOUSE,G3UVV4_MOUSE,HXK1_MOUSE	Hexokinase 1 Hexokinase-1,Hexokinase-1,Hexokinase-1,Hexokinase-1,Hexokinase-1,Hexokinase 1, isoform CRA_f Hexokinase-1,Hexokinase-1	Hk1,Hk1,Hk1,Hk1,Hk1,Hk1 mCG_127656,Hk1	ENSMUST00000130091 ENSMUST00000132926 ENSMUST00000133429 ENSMUST00000134447 ENSMUST00000134877 ENSMUST00000135317 ENSMUST00000136548 ENSMUST00000140383 ENSMUST00000143236 ENSMUST00000154489,ENSMUST00000139228,ENSMUST00000143179,ENSMUST00000152761,ENSMUST00000149534,ENSMUST00000130422,ENSMUST00000072357 ENSMUST00000099691 ENSMUST00000116238	ENSMUSP00000122791,ENSMUSP00000118166,ENSMUSP00000120151,ENSMUSP00000117752,ENSMUSP00000119812,ENSMUSP00000118601,ENSMUSP00000072195	ENSMUSG00000037012,ENSMUSG00000037012,ENSMUSG00000037012,ENSMUSG00000037012,ENSMUSG00000037012,ENSMUSG00000037012,ENSMUSG00000037012	1252.3	1112.29	1392.31	0.323685	0.000526258	0.0243736
ENSMUSG00000020027	chr10	95385362	95417180	-	Socs2	protein_coding	D3YZ26,D3Z355,D3Z441,F6RVG2,O35717	D3YZ26_MOUSE,D3Z355_MOUSE,D3Z441_MOUSE,F6RVG2_MOUSE,SOCS2_MOUSE	Suppressor of cytokine-signaling 2,Suppressor of cytokine-signaling 2,Suppressor of cytokine-signaling 2,Suppressor of cytokine-signaling 2,Suppressor of cytokine signaling 2	Socs2,Socs2,Socs2,Socs2,Socs2 Cis2 Cish2	ENSMUST00000135822,ENSMUST00000150432,ENSMUST00000129942,ENSMUST00000139210,ENSMUST00000020215 ENSMUST00000119917 ENSMUST00000170690 ENSMUST00000172070	ENSMUSP00000118720,ENSMUSP00000117785,ENSMUSP00000117576,ENSMUSP00000121305,ENSMUSP00000020215	ENSMUSG00000020027,ENSMUSG00000020027,ENSMUSG00000020027,ENSMUSG00000020027,ENSMUSG00000020027	2280.78	2025.89	2535.67	0.323669	0.000621377	0.0271609
ENSMUSG00000001029	chr11	106377656	106388075	-	Icam2	protein_coding	B1ARJ2,G3UWJ5,G5E8M9,P35330 Q9D8Q4	B1ARJ2_MOUSE,G3UWJ5_MOUSE,G5E8M9_MOUSE,ICAM2_MOUSE	Intercellular adhesion molecule 2,Intercellular adhesion molecule 2,Intercellular adhesion molecule 2,Intercellular adhesion molecule 2	Icam2,Icam2,Icam2,Icam2 Icam-2	ENSMUST00000141146,ENSMUST00000173795,ENSMUST00000106813,ENSMUST00000001055	ENSMUSP00000118043,ENSMUSP00000133315,ENSMUSP00000102426,ENSMUSP00000001055	ENSMUSG00000001029,ENSMUSG00000001029,ENSMUSG00000001029,ENSMUSG00000001029	1556.3	1382.41	1730.18	0.323527	0.000875215	0.0339576
ENSMUSG00000025791	chr4	99929414	99987294	+	Pgm2	protein_coding	A2CEK3,Q9D0F9 Q3UGE3 Q922D6	A2CEK3_MOUSE,PGM1_MOUSE	Phosphoglucomutase-2,Phosphoglucomutase-1	Pgm2,Pgm1 Pgm2	ENSMUST00000102783,ENSMUST00000058351	ENSMUSP00000099844,ENSMUSP00000061227	ENSMUSG00000025791,ENSMUSG00000025791	2347.28	2085.1	2609.46	0.323496	0.000160114	0.00984564
ENSMUSG00000032867	chr5	118064965	118155464	-	Fbxw8	protein_coding	Q8BIA4 Q8BI62 Q8BI75 Q8BI76 Q8CID8 Q921Z1	FBXW8_MOUSE	F-box/WD repeat-containing protein 8	Fbxw8	ENSMUST00000049474	ENSMUSP00000047012	ENSMUSG00000032867	2268.54	2018.44	2518.63	0.319255	2.49356e-05	0.00246994
ENSMUSG00000036040	chr2	27079379	27108981	+	Adamtsl2	protein_coding	Q7TSK7 Q3U0C8	ATL2_MOUSE	ADAMTS-like protein 2	Adamtsl2 Kiaa0605 Tcp1	ENSMUST00000091233	ENSMUSP00000088774	ENSMUSG00000036040	3000.94	2671.2	3330.68	0.318219	1.46326e-05	0.00165897
ENSMUSG00000022197	chr15	12359711	12739924	-	Pdzd2	protein_coding	E9Q1M1	E9Q1M1_MOUSE	Protein Pdzd2	Pdzd2	ENSMUST00000075317	ENSMUSP00000074788	ENSMUSG00000022197	3643.09	3243.49	4042.68	0.317678	3.05274e-06	0.000520227
ENSMUSG00000020423	chr1	134075170	134079120	-	Btg2	protein_coding	Q04211	BTG2_MOUSE	Protein BTG2	Btg2 Tis21	ENSMUST00000020692	ENSMUSP00000020692	ENSMUSG00000020423	5258.37	4682.83	5833.91	0.31702	1.72919e-06	0.000342192
ENSMUSG00000031661	chr8	88521344	88594887	+	Nkd1	protein_coding	E9Q5K6,Q99MH6 Q3TLD6 Q8K200 Q91Y46	E9Q5K6_MOUSE,NKD1_MOUSE	Protein naked cuticle homolog 1,Protein naked cuticle homolog 1	Nkd1,Nkd1	ENSMUST00000169179,ENSMUST00000034086	ENSMUSP00000125935,ENSMUSP00000034086	ENSMUSG00000031661,ENSMUSG00000031661	2594.5	2310.61	2878.4	0.316868	0.000232976	0.0128716
ENSMUSG00000023039	chr15	101411043	101430313	+	Krt7	protein_coding	D3Z6N5,Q9DCV7	D3Z6N5_MOUSE,K2C7_MOUSE	Keratin, type II cytoskeletal 7,Keratin, type II cytoskeletal 7	Krt7,Krt7 Krt2-7	ENSMUST00000147662,ENSMUST00000068904	ENSMUSP00000117046,ENSMUSP00000069900	ENSMUSG00000023039,ENSMUSG00000023039	6435.8	5732.36	7139.25	0.316595	1.08989e-05	0.00131805
ENSMUSG00000022132	chr14	118787908	118875489	+	Cldn10	protein_coding	Q9Z0S6 E9PVC8 E9PWP4 E9QMP1 Q8VC62 Q9CX57	CLD10_MOUSE	Claudin-10	Cldn10 Cldn10a	ENSMUST00000047761 ENSMUST00000071546 ENSMUST00000100314	ENSMUSP00000041616	ENSMUSG00000022132	1414.98	1260.39	1569.56	0.316269	0.00147169	0.0480034
ENSMUSG00000020476	chr11	5788488	5800962	+	Dbnl	protein_coding	Q62418 Q3TG34 Q3U5X3 Q3U8I5 Q3UZ33 Q5NCI5 Q5NCI6 Q5NCI7 Q80WP1 Q8BH56	DBNL_MOUSE	Drebrin-like protein	Dbnl Abp1 Sh3p7	ENSMUST00000020769 ENSMUST00000102928 ENSMUST00000109845	ENSMUSP00000020769	ENSMUSG00000020476	2387.56	2128.91	2646.21	0.313678	0.000101497	0.00722022
ENSMUSG00000056973	chr8	93166068	93197838	-	Ces1d	protein_coding	Q8VCT4 Q91ZV9 Q924V8 Q9ULY1	CES1D_MOUSE	Carboxylesterase 1D	Ces1d Ces1 Ces3	ENSMUST00000034172	ENSMUSP00000034172	ENSMUSG00000056973	5549.06	4961.79	6136.33	0.30646	2.53863e-06	0.000468744
ENSMUSG00000025647	chr9	109038565	109057777	+	Shisa5	protein_coding	D3Z2D0,E9PZN7,E9Q0A6,E9Q3X2,E9Q5K3,E9Q633,E9Q653,E9QB08,G3UWC7,Q9D7I0 Q8BJ86 Q8BJ87 Q8BLE9 Q8K4W3 Q91Z37 Q9CQP5	D3Z2D0_MOUSE,E9PZN7_MOUSE,E9Q0A6_MOUSE,E9Q3X2_MOUSE,E9Q5K3_MOUSE,E9Q633_MOUSE,E9Q653_MOUSE,E9QB08_MOUSE,G3UWC7_MOUSE,SHSA5_MOUSE	Protein shisa-5,Protein shisa-5,Protein shisa-5,Protein shisa-5,Protein shisa-5,Protein shisa-5,Protein shisa-5,Protein shisa-5,Protein shisa-5 Scotin,Protein shisa-5	Shisa5,Shisa5,Shisa5,Shisa5,Shisa5,Shisa5,Shisa5,Shisa5,Shisa5 Scotin mCG_16092,Shisa5 Scotin	ENSMUST00000127969,ENSMUST00000152771,ENSMUST00000151141,ENSMUST00000154113,ENSMUST00000120218,ENSMUST00000135942,ENSMUST00000155541,ENSMUST00000124432,ENSMUST00000059097 ENSMUST00000128976 ENSMUST00000143754,ENSMUST00000026737 ENSMUST00000112059 ENSMUST00000120305 ENSMUST00000154184	ENSMUSP00000119376,ENSMUSP00000126317,ENSMUSP00000126267,ENSMUSP00000127241,ENSMUSP00000113967,ENSMUSP00000130500,ENSMUSP00000128175,ENSMUSP00000130652,ENSMUSP00000059025,ENSMUSP00000026737	ENSMUSG00000025647,ENSMUSG00000025647,ENSMUSG00000025647,ENSMUSG00000025647,ENSMUSG00000025647,ENSMUSG00000025647,ENSMUSG00000025647,ENSMUSG00000025647,ENSMUSG00000025647,ENSMUSG00000025647	1881.69	1683.39	2080	0.305047	0.00028607	0.0150039
ENSMUSG00000023942	chr17	45585200	45599606	-	Slc29a1	protein_coding	E9PVH9,E9PWD6,E9PWY7,E9PXM6,E9PXQ6,E9PZV0,E9Q0Q5,E9Q221,E9Q3D1,E9Q503,E9Q5E9,E9Q7R8,Q9JIM1 Q99K84 Q9DBT8 Q9JHF0	E9PVH9_MOUSE,E9PWD6_MOUSE,E9PWY7_MOUSE,E9PXM6_MOUSE,E9PXQ6_MOUSE,E9PZV0_MOUSE,E9Q0Q5_MOUSE,E9Q221_MOUSE,E9Q3D1_MOUSE,E9Q503_MOUSE,E9Q5E9_MOUSE,E9Q7R8_MOUSE,S29A1_MOUSE	Equilibrative nucleoside transporter 1,Equilibrative nucleoside transporter 1,Equilibrative nucleoside transporter 1,Equilibrative nucleoside transporter 1,Equilibrative nucleoside transporter 1,Equilibrative nucleoside transporter 1,Equilibrative nucleoside transporter 1,Equilibrative nucleoside transporter 1,Equilibrative nucleoside transporter 1,Equilibrative nucleoside transporter 1,Equilibra…	Slc29a1,Slc29a1,Slc29a1,Slc29a1,Slc29a1,Slc29a1,Slc29a1,Slc29a1,Slc29a1,Slc29a1,Slc29a1,Slc29a1,Slc29a1 Ent1	ENSMUST00000164618,ENSMUST00000172301,ENSMUST00000164217 ENSMUST00000171081,ENSMUST00000164769,ENSMUST00000166633,ENSMUST00000163905,ENSMUST00000168274,ENSMUST00000167332,ENSMUST00000169729,ENSMUST00000167195,ENSMUST00000170113,ENSMUST00000170488,ENSMUST00000051574 ENSMUST00000064889 ENSMUST00000097317 ENSMUST00000163492 ENSMUST00000166119 ENSMUST00000167692 ENSMUST00000171847	ENSMUSP00000126934,ENSMUSP00000129345,ENSMUSP00000131646,ENSMUSP00000131116,ENSMUSP00000131075,ENSMUSP00000129240,ENSMUSP00000127754,ENSMUSP00000131483,ENSMUSP00000127343,ENSMUSP00000133162,ENSMUSP00000128304,ENSMUSP00000128999,ENSMUSP00000063096	ENSMUSG00000023942,ENSMUSG00000023942,ENSMUSG00000023942,ENSMUSG00000023942,ENSMUSG00000023942,ENSMUSG00000023942,ENSMUSG00000023942,ENSMUSG00000023942,ENSMUSG00000023942,ENSMUSG00000023942,ENSMUSG00000023942,ENSMUSG00000023942,ENSMUSG00000023942	1297.99	1161.9	1434.08	0.303405	0.000847526	0.0332506
ENSMUSG00000034993	chr11	101458745	101466230	-	Vat1	protein_coding	Q62465 Q8R3G0 Q8R3T8	VAT1_MOUSE	Synaptic vesicle membrane protein VAT-1 homolog	Vat1 Vat-1	ENSMUST00000040430	ENSMUSP00000048350	ENSMUSG00000034993	3150.08	2820.06	3480.1	0.303304	3.78853e-05	0.00346507
ENSMUSG00000028041	chr3	89338542	89349996	-	Adam15	protein_coding	O88839 A4ZYV2 Q3TDN7 Q3U7C2 Q3UE21 Q8C7Z0 Q91VS9 Q9QYL2	ADA15_MOUSE	Disintegrin and metalloproteinase domain-containing protein 15	Adam15 Mdc15	ENSMUST00000029676 ENSMUST00000074582 ENSMUST00000107446 ENSMUST00000107448 ENSMUST00000184651	ENSMUSP00000029676	ENSMUSG00000028041	1433.1	1284.02	1582.18	0.301038	0.000628243	0.0273512
ENSMUSG00000026479	chr1	153122756	153186447	-	Lamc2	protein_coding	G5E874	G5E874_MOUSE	Laminin subunit gamma-2 Laminin, gamma 2	Lamc2 mCG_22678	ENSMUST00000027753	ENSMUSP00000027753	ENSMUSG00000026479	6232.87	5585.44	6880.3	0.300752	6.21965e-06	0.00089072
ENSMUSG00000033060	chr14	101729957	101934710	+	Lmo7	protein_coding	E0CZD8,E9PYF4,E9PYI7,F6TFN2,F6VG99,Q3UPW3	E0CZD8_MOUSE,E9PYF4_MOUSE,E9PYI7_MOUSE,F6TFN2_MOUSE,F6VG99_MOUSE,Q3UPW3_MOUSE	Protein Lmo7,Protein Lmo7,Protein Lmo7,Protein Lmo7,Protein Lmo7,Protein Lmo7	Lmo7,Lmo7,Lmo7,Lmo7,Lmo7,Lmo7	ENSMUST00000159258,ENSMUST00000100337,ENSMUST00000159314,ENSMUST00000159806,ENSMUST00000159597,ENSMUST00000159026	ENSMUSP00000125465,ENSMUSP00000097910,ENSMUSP00000124349,ENSMUSP00000124300,ENSMUSP00000123706,ENSMUSP00000124605	ENSMUSG00000033060,ENSMUSG00000033060,ENSMUSG00000033060,ENSMUSG00000033060,ENSMUSG00000033060,ENSMUSG00000033060	12736.1	11414.2	14058	0.300539	6.70428e-07	0.000163124
ENSMUSG00000036528	chr7	107595051	107748582	+	Ppfibp2	protein_coding	G3X957,O35711 Q497W6 Q7TMG4 Q8CBS6 Q99KX6	G3X957_MOUSE,LIPB2_MOUSE	Liprin-beta-2 Protein tyrosine phosphatase, receptor-type, F interacting protein, binding protein 2, isoform CRA_a,Liprin-beta-2	Ppfibp2 mCG_141440,Ppfibp2 Cclp1	ENSMUST00000040056,ENSMUST00000098134	ENSMUSP00000042574,ENSMUSP00000095738	ENSMUSG00000036528,ENSMUSG00000036528	1221.07	1094.35	1347.79	0.300276	0.00118659	0.0417955
ENSMUSG00000020538	chr11	60199089	60222581	-	Srebf1	protein_coding	F6XZS9,Q9WTN3 Q3U458 Q3UDJ3 Q5SRX5 Q8C733 Q99JK7	F6XZS9_MOUSE,SRBP1_MOUSE	Sterol regulatory element-binding protein 1,Sterol regulatory element-binding protein 1	Srebf1,Srebf1 Srebp1	ENSMUST00000134660,ENSMUST00000020846	ENSMUSP00000122934,ENSMUSP00000020846	ENSMUSG00000020538,ENSMUSG00000020538	2923.79	2620.61	3226.96	0.300169	0.000104247	0.00728097
ENSMUSG00000033685	chr7	100493337	100502020	+	Ucp2	protein_coding	D3YXM5,D3YZE5,D3YZG5,P70406 O88285	D3YXM5_MOUSE,D3YZE5_MOUSE,D3YZG5_MOUSE,UCP2_MOUSE	Mitochondrial uncoupling protein 2,Mitochondrial uncoupling protein 2,Mitochondrial uncoupling protein 2,Mitochondrial uncoupling protein 2	Ucp2,Ucp2,Ucp2,Ucp2 Slc25a8	ENSMUST00000153287,ENSMUST00000129324,ENSMUST00000133044,ENSMUST00000126534	ENSMUSP00000115953,ENSMUSP00000115648,ENSMUSP00000115598,ENSMUSP00000120967	ENSMUSG00000033685,ENSMUSG00000033685,ENSMUSG00000033685,ENSMUSG00000033685	4668.69	4189.43	5147.94	0.297178	2.04185e-05	0.00213951
ENSMUSG00000039457	chr16	5086291	5132481	-	Ppl	protein_coding	G5E898	G5E898_MOUSE	Periplakin	Ppl mCG_128725	ENSMUST00000035672	ENSMUSP00000039360	ENSMUSG00000039457	2663.06	2390.67	2935.45	0.296052	0.000215382	0.0122095
ENSMUSG00000000303	chr8	106603351	106670246	+	Cdh1	protein_coding	P09803 Q61377	CADH1_MOUSE	Cadherin-1	Cdh1	ENSMUST00000000312 ENSMUST00000167688	ENSMUSP00000000312	ENSMUSG00000000303	8576.88	7703.86	9449.9	0.294684	1.36673e-06	0.000297509
ENSMUSG00000035697	chr10	80016653	80031472	+	Hmha1	protein_coding	D3Z7R7,G3X9Q3,Q3TBD2 Q3TDD2 Q3TSW0 Q3TXM6 Q3UZ72 Q8BI83 Q9CU46	D3Z7R7_MOUSE,G3X9Q3_MOUSE,HMHA1_MOUSE	Minor histocompatibility protein HA-1,Histocompatibility (Minor) HA-1, isoform CRA_a Minor histocompatibility protein HA-1,Minor histocompatibility protein HA-1	Hmha1,Hmha1 mCG_13376,Hmha1	ENSMUST00000105373,ENSMUST00000099501,ENSMUST00000043311	ENSMUSP00000101012,ENSMUSP00000097100,ENSMUSP00000041019	ENSMUSG00000035697,ENSMUSG00000035697,ENSMUSG00000035697	2018.07	1814.11	2222.03	0.292469	0.000586373	0.0263722
ENSMUSG00000041120	chr4	139082284	139092993	-	Nbl1	protein_coding	Q61477 Q499K5	NBL1_MOUSE	Neuroblastoma suppressor of tumorigenicity 1	Nbl1 Dan Dana	ENSMUST00000042844	ENSMUSP00000045608	ENSMUSG00000041120	1539.16	1383.88	1694.44	0.291899	0.00114842	0.0407282
ENSMUSG00000030342	chr6	125460266	125494791	-	Cd9	protein_coding	P40240 Q3U9W0	CD9_MOUSE	CD9 antigen	Cd9	ENSMUST00000032492	ENSMUSP00000032492	ENSMUSG00000030342	4966.31	4468.75	5463.86	0.28999	6.40873e-05	0.00516686
ENSMUSG00000033174	chr6	88724412	88828360	+	Mgll	protein_coding	D3YYS6,E9Q3B9,O35678 Q3V2R0 Q9D9G8,Q3UFN1	D3YYS6_MOUSE,E9Q3B9_MOUSE,MGLL_MOUSE,Q3UFN1_MOUSE	Monoglyceride lipase,Monoglyceride lipase,Monoglyceride lipase,Monoglyceride lipase	Mgll,Mgll,Mgll,Mgll	ENSMUST00000113581,ENSMUST00000163271,ENSMUST00000089449 ENSMUST00000113585,ENSMUST00000113582	ENSMUSP00000109211,ENSMUSP00000127374,ENSMUSP00000086872,ENSMUSP00000109212	ENSMUSG00000033174,ENSMUSG00000033174,ENSMUSG00000033174,ENSMUSG00000033174	2118.82	1907.49	2330.15	0.288612	0.000666	0.0285384
ENSMUSG00000027187	chr2	103453849	103485160	-	Cat	protein_coding	A2AL20,P24270 Q3TXQ6	A2AL20_MOUSE,CATA_MOUSE	Catalase Catalase, isoform CRA_a,Catalase	Cat mCG_9645,Cat Cas-1 Cas1	ENSMUST00000111168,ENSMUST00000028610	ENSMUSP00000106798,ENSMUSP00000028610	ENSMUSG00000027187,ENSMUSG00000027187	3728.25	3359.27	4097.23	0.286424	3.05961e-05	0.00289572
ENSMUSG00000017754	chr2	164839518	164857711	-	Pltp	protein_coding	A2A5K2,A2A5K3,A2A5K4,P55065 Q99L70	A2A5K2_MOUSE,A2A5K3_MOUSE,A2A5K4_MOUSE,PLTP_MOUSE	Phospholipid transfer protein,Phospholipid transfer protein,Phospholipid transfer protein,Phospholipid transfer protein	Pltp,Pltp,Pltp,Pltp	ENSMUST00000109317,ENSMUST00000128110,ENSMUST00000156255,ENSMUST00000059954 ENSMUST00000109316	ENSMUSP00000104940,ENSMUSP00000122760,ENSMUSP00000119955,ENSMUSP00000061519	ENSMUSG00000017754,ENSMUSG00000017754,ENSMUSG00000017754,ENSMUSG00000017754	1837.25	1655.64	2018.87	0.286003	0.000557512	0.0252831
ENSMUSG00000039952	chr9	108204634	108263958	-	Dag1	protein_coding	Q62165 Q61094 Q61141 Q61497	DAG1_MOUSE	Dystroglycan	Dag1 Dag-1	ENSMUST00000080435 ENSMUST00000166905 ENSMUST00000171412	ENSMUSP00000079294	ENSMUSG00000039952	11044.8	9955.11	12134.4	0.285568	1.64021e-06	0.000330593
ENSMUSG00000028756	chr4	138313409	138326307	-	Pink1	protein_coding	A2AM76,A2AM78,Q99MQ3 A2AM77 Q7TMZ3 Q811I8 Q91XU5	A2AM76_MOUSE,A2AM78_MOUSE,PINK1_MOUSE	Serine/threonine-protein kinase PINK1, mitochondrial,Serine/threonine-protein kinase PINK1, mitochondrial,Serine/threonine-protein kinase PINK1, mitochondrial	Pink1,Pink1,Pink1	ENSMUST00000105816,ENSMUST00000105817,ENSMUST00000030536	ENSMUSP00000101442,ENSMUSP00000101443,ENSMUSP00000030536	ENSMUSG00000028756,ENSMUSG00000028756,ENSMUSG00000028756	2331.95	2104.32	2559.58	0.282434	0.00142875	0.0469803
ENSMUSG00000006356	chr12	113140236	113145506	+	Crip2	protein_coding	Q9DCT8	CRIP2_MOUSE	Cysteine-rich protein 2	Crip2 Crp2 Hlp	ENSMUST00000084882	ENSMUSP00000081943	ENSMUSG00000006356	6018.02	5434.37	6601.67	0.280672	8.00426e-05	0.00622274
ENSMUSG00000037031	chr10	62185396	62231218	-	Tspan15	protein_coding	F7BWT7 C0H5X1 Q3TA07	TSN15_MOUSE	Tetraspanin-15	Tspan15	ENSMUST00000047883	ENSMUSP00000047029	ENSMUSG00000037031	4471.11	4038.7	4903.52	0.279864	0.00108831	0.0394384
ENSMUSG00000017774	chr11	75650504	75673910	+	Myo1c	protein_coding	Q5ND45,Q9WTI7 O08571 O08834 Q3TBQ4 Q3U231 Q5ND46 Q5ND48 Q5ND49 Q9ERB6 Q9QW54	Q5ND45_MOUSE,MYO1C_MOUSE	Unconventional myosin-Ic,Unconventional myosin-Ic	Myo1c,Myo1c	ENSMUST00000136935,ENSMUST00000069057 ENSMUST00000102504 ENSMUST00000102505 ENSMUST00000108431	ENSMUSP00000121267,ENSMUSP00000070388	ENSMUSG00000017774,ENSMUSG00000017774	8900.16	8050.75	9749.57	0.276185	2.78933e-05	0.00271063
ENSMUSG00000038296	chr7	111471661	111779977	-	Galnt18	protein_coding	Q59J91,Q8K1B9	Q59J91_MOUSE,GLT18_MOUSE	Polypeptide N-acetylgalactosaminyltransferase 18 UDP-N-acetyl-alpha-D-galactosamine:polypeptide N-acetylgalactosaminyltransferase UDP-N-acetyl-alpha-D-galactosamine:polypeptide N-acetylgalactosaminyltransferase-like 4, isoform CRA_b,Polypeptide N-acetylgalactosaminyltransferase 18	Galnt18 Galntl4 mpp-GalNAc-T18(O18) mCG_121924,Galnt18 Galntl4	ENSMUST00000106663,ENSMUST00000049430	ENSMUSP00000102274,ENSMUSP00000043636	ENSMUSG00000038296,ENSMUSG00000038296	2251.43	2038.76	2464.09	0.273245	0.000915072	0.0350692
ENSMUSG00000018001	chr5	143622447	143710250	+	Cyth3	protein_coding	D3YXU3,G5E8Q4,H3BK81,O08967 Q8CI93	D3YXU3_MOUSE,G5E8Q4_MOUSE,H3BK81_MOUSE,CYH3_MOUSE	Cytohesin-3,Cytohesin-3 Pleckstrin homology, Sec7 and coiled-coil domains 3, isoform CRA_b,Cytohesin-3,Cytohesin-3	Cyth3,Cyth3 Pscd3 mCG_17964,Cyth3,Cyth3 Grp1 Pscd3	ENSMUST00000131436,ENSMUST00000110727,ENSMUST00000177281,ENSMUST00000116456	ENSMUSP00000118290,ENSMUSP00000106355,ENSMUSP00000135287,ENSMUSP00000112157	ENSMUSG00000018001,ENSMUSG00000018001,ENSMUSG00000018001,ENSMUSG00000018001	2808.08	2543.77	3072.4	0.272304	0.000604662	0.0267526
ENSMUSG00000026664	chr2	4919019	4938730	+	Phyh	protein_coding	O35386 O08527	PAHX_MOUSE	Phytanoyl-CoA dioxygenase, peroxisomal	Phyh Ln1 Lnap1 Pahx	ENSMUST00000027975	ENSMUSP00000027975	ENSMUSG00000026664	2356.72	2135.07	2578.37	0.272063	0.000978424	0.0361336
ENSMUSG00000023175	chr10	79704491	79711969	+	Bsg	protein_coding	J3QP71,K3W4Q8,P18572 Q6LDB0 Q7TSC0	J3QP71_MOUSE,K3W4Q8_MOUSE,BASI_MOUSE	Basigin,Basigin Basigin, isoform CRA_d,Basigin	Bsg,Bsg mCG_13385,Bsg	ENSMUST00000178383,ENSMUST00000105381,ENSMUST00000067036 ENSMUST00000179781	ENSMUSP00000137126,ENSMUSP00000101020,ENSMUSP00000070751	ENSMUSG00000023175,ENSMUSG00000023175,ENSMUSG00000023175	19417.9	17596.8	21239	0.271384	0.000125278	0.00826376
ENSMUSG00000001552	chr11	100368958	100397763	-	Jup	protein_coding	Q02257 Q8CGD3	PLAK_MOUSE	Junction plakoglobin	Jup	ENSMUST00000001592 ENSMUST00000107403	ENSMUSP00000001592	ENSMUSG00000001552	4797.11	4348.09	5246.13	0.270813	0.000104358	0.00728097
ENSMUSG00000024589	chr18	64887756	65217826	+	Nedd4l	protein_coding	E9PXB7,G3X9H8	E9PXB7_MOUSE,G3X9H8_MOUSE	E3 ubiquitin-protein ligase NEDD4-like,E3 ubiquitin-protein ligase	Nedd4l,Nedd4l mCG_131856	ENSMUST00000163516,ENSMUST00000080418	ENSMUSP00000132838,ENSMUSP00000079280	ENSMUSG00000024589,ENSMUSG00000024589	5401.56	4897.21	5905.91	0.270151	1.45378e-05	0.00165897
ENSMUSG00000001507	chr11	95044474	95076801	-	Itga3	protein_coding	F6UD16,Q62470 Q08441 Q08442 Q5SWA8 Q5SWB9 Q6P6I1	F6UD16_MOUSE,ITA3_MOUSE	Integrin alpha-3,Integrin alpha-3	Itga3,Itga3	ENSMUST00000145671,ENSMUST00000001548 ENSMUST00000107739 ENSMUST00000120375	ENSMUSP00000115970,ENSMUSP00000001548	ENSMUSG00000001507,ENSMUSG00000001507	2832.05	2568.09	3096	0.269611	0.000600014	0.0267526
ENSMUSG00000033161	chr3	101576219	101604684	-	Atp1a1	protein_coding	Q8VDN2 Q91Z09	AT1A1_MOUSE	Sodium/potassium-transporting ATPase subunit alpha-1	Atp1a1	ENSMUST00000036493	ENSMUSP00000039657	ENSMUSG00000033161	7788.03	7070.1	8505.96	0.26671	5.80032e-06	0.000846748
ENSMUSG00000038459	chr7	84109356	84151893	-	Abhd17c	protein_coding	Q8VCV1	AB17C_MOUSE	Alpha/beta hydrolase domain-containing protein 17C	Abhd17c	ENSMUST00000117085	ENSMUSP00000112988	ENSMUSG00000038459	2510.27	2279.53	2741.02	0.265869	0.000384455	0.0186804
ENSMUSG00000026796	chr2	32876114	32925254	+	Fam129b	protein_coding	A2ARS6,Q8R1F1 Q3TCV6 Q3U8I3 Q3UC84 Q3UDW4 Q3UIE4 Q543S7 Q8BQ71 Q8CC78	A2ARS6_MOUSE,NIBL1_MOUSE	Niban-like protein 1,Niban-like protein 1	Fam129b,Fam129b	ENSMUST00000138781,ENSMUST00000028135	ENSMUSP00000114232,ENSMUSP00000028135	ENSMUSG00000026796,ENSMUSG00000026796	7991.5	7257.72	8725.28	0.265651	8.63352e-06	0.00107993
ENSMUSG00000039115	chr9	118606690	118901003	+	Itga9	protein_coding	B8JK39,E9QAP0,F7DB81	B8JK39_MOUSE,E9QAP0_MOUSE,F7DB81_MOUSE	Protein Itga9,Protein Itga9,Protein Itga9	Itga9,Itga9,Itga9	ENSMUST00000044165,ENSMUST00000124360,ENSMUST00000149150	ENSMUSP00000044227,ENSMUSP00000122417,ENSMUSP00000122408	ENSMUSG00000039115,ENSMUSG00000039115,ENSMUSG00000039115	3133.79	2847.03	3420.54	0.264682	0.000305745	0.0155501
ENSMUSG00000004040	chr11	100885098	100939540	-	Stat3	protein_coding	B7ZC18,P42227 A2A5D1 B7ZC17	B7ZC18_MOUSE,STAT3_MOUSE	Signal transducer and activator of transcription,Signal transducer and activator of transcription 3	Stat3,Stat3 Aprf	ENSMUST00000138438,ENSMUST00000092671 ENSMUST00000103114 ENSMUST00000127638	ENSMUSP00000121677,ENSMUSP00000090342	ENSMUSG00000004040,ENSMUSG00000004040	2801.49	2545.65	3057.34	0.264144	0.000304578	0.0155501
ENSMUSG00000003534	chr17	35681567	35704621	-	Ddr1	protein_coding	B0V2H8,B0V2H9,B0V2I0,D6RII6,E9PW79,F7BZR8,G3UXE5,Q03146	B0V2H8_MOUSE,B0V2H9_MOUSE,B0V2I0_MOUSE,D6RII6_MOUSE,E9PW79_MOUSE,F7BZR8_MOUSE,G3UXE5_MOUSE,DDR1_MOUSE	Epithelial discoidin domain-containing receptor 1,Epithelial discoidin domain-containing receptor 1,Epithelial discoidin domain-containing receptor 1,Epithelial discoidin domain-containing receptor 1,Epithelial discoidin domain-containing receptor 1,Epithelial discoidin domain-containing receptor 1,Epithelial discoidin domain-containing receptor 1,Epithelial discoidin domain-containing receptor 1	Ddr1,Ddr1,Ddr1,Ddr1,Ddr1,Ddr1,Ddr1,Ddr1 Cak Eddr1 Mpk6	ENSMUST00000134995,ENSMUST00000146472,ENSMUST00000145900,ENSMUST00000148065,ENSMUST00000155957,ENSMUST00000135078,ENSMUST00000155628,ENSMUST00000003628 ENSMUST00000097333 ENSMUST00000117301 ENSMUST00000119825 ENSMUST00000166980	ENSMUSP00000117301,ENSMUSP00000119397,ENSMUSP00000122361,ENSMUSP00000120635,ENSMUSP00000117427,ENSMUSP00000122191,ENSMUSP00000133659,ENSMUSP00000003628	ENSMUSG00000003534,ENSMUSG00000003534,ENSMUSG00000003534,ENSMUSG00000003534,ENSMUSG00000003534,ENSMUSG00000003534,ENSMUSG00000003534,ENSMUSG00000003534	2460.2	2235.58	2684.83	0.264071	0.000699869	0.0296396
ENSMUSG00000023010	chr15	99392882	99410049	+	Tmbim6	protein_coding	E0CX98,E0CXR0,E0CZE8,Q9D2C7 Q3TX81 Q8BFY4	E0CX98_MOUSE,E0CXR0_MOUSE,E0CZE8_MOUSE,BI1_MOUSE	Bax inhibitor 1,Bax inhibitor 1,Bax inhibitor 1,Bax inhibitor 1	Tmbim6,Tmbim6,Tmbim6,Tmbim6 Tegt	ENSMUST00000161778,ENSMUST00000162624,ENSMUST00000162274,ENSMUST00000023749 ENSMUST00000159209 ENSMUST00000159531 ENSMUST00000160635 ENSMUST00000161250	ENSMUSP00000124805,ENSMUSP00000125091,ENSMUSP00000125437,ENSMUSP00000023749	ENSMUSG00000023010,ENSMUSG00000023010,ENSMUSG00000023010,ENSMUSG00000023010	9080.61	8252.18	9909.05	0.263942	5.34288e-06	0.000799593
ENSMUSG00000006273	chr8	69088646	69113711	+	Atp6v1b2	protein_coding	P62814 O09045 P50517 Q3TG74 Q3TL62 Q3TVK6 Q3TWR0 Q3U791 Q3U7C8 Q3U9Z0 Q3UAW7	VATB2_MOUSE	V-type proton ATPase subunit B, brain isoform	Atp6v1b2 Atp6b2 Vat2	ENSMUST00000006435	ENSMUSP00000006435	ENSMUSG00000006273	3215.42	2924.97	3505.87	0.26127	0.000250875	0.0136526
ENSMUSG00000001768	chr2	145784734	145887616	+	Rin2	protein_coding	E0CYG9,E0CZD2,F8WGD2,Q9D684 A8Y5L0 Q3U6Z8 Q3UAK3 Q3UC54 Q99K06	E0CYG9_MOUSE,E0CZD2_MOUSE,F8WGD2_MOUSE,RIN2_MOUSE	Ras and Rab interactor 2,Ras and Rab interactor 2,Ras and Rab interactor 2,Ras and Rab interactor 2	Rin2,Rin2,Rin2,Rin2	ENSMUST00000147976 ENSMUST00000150449,ENSMUST00000142847,ENSMUST00000094480,ENSMUST00000110005	ENSMUSP00000124206,ENSMUSP00000125476,ENSMUSP00000092053,ENSMUSP00000105632	ENSMUSG00000001768,ENSMUSG00000001768,ENSMUSG00000001768,ENSMUSG00000001768	3330.9	3030.03	3631.77	0.261265	0.000187725	0.0109849
ENSMUSG00000030800	chr7	127925725	127930113	-	Prss8	protein_coding	Q99L44	Q99L44_MOUSE	Prostasin Protease, serine, 8 (Prostasin)	Prss8	ENSMUST00000032988	ENSMUSP00000032988	ENSMUSG00000030800	2838.63	2582.95	3094.32	0.260514	0.00034031	0.0167599
ENSMUSG00000024130	chr17	24351950	24410201	+	Abca3	protein_coding	Q6AXE3,Q8R420 Q3U3L4	Q6AXE3_MOUSE,ABCA3_MOUSE	ATP-binding cassette sub-family A member 3 Abca3 protein,ATP-binding cassette sub-family A member 3	Abca3,Abca3	ENSMUST00000117337,ENSMUST00000039013 ENSMUST00000079594	ENSMUSP00000113538,ENSMUSP00000045285	ENSMUSG00000024130,ENSMUSG00000024130	7789.61	7090.18	8489.04	0.259746	0.000139329	0.00892035
ENSMUSG00000074743	chr2	148404466	148408188	-	Thbd	protein_coding	P15306	TRBM_MOUSE	Thrombomodulin	Thbd	ENSMUST00000099270	ENSMUSP00000096877	ENSMUSG00000074743	4850.33	4414.95	5285.71	0.259648	5.80542e-05	0.00486048
ENSMUSG00000050953	chr10	56377300	56390419	+	Gja1	protein_coding	P23242 Q544I7 Q8CE05	CXA1_MOUSE	Gap junction alpha-1 protein	Gja1 Cxn-43	ENSMUST00000068581	ENSMUSP00000064536	ENSMUSG00000050953	5180.81	4718.27	5643.36	0.258245	0.000103625	0.00728097
ENSMUSG00000031503	chr8	11312805	11449287	+	Col4a2	protein_coding	D3YV27,P08122 Q3B7C2 Q3TPV9 Q61375 Q66JS5 Q6RCT6 Q6RCT7 Q6U9X1 Q8BPI9 Q8BPK3 Q91VI3	D3YV27_MOUSE,CO4A2_MOUSE	Collagen alpha-2(IV) chain,Collagen alpha-2(IV) chain	Col4a2,Col4a2	ENSMUST00000145295,ENSMUST00000033899	ENSMUSP00000114737,ENSMUSP00000033899	ENSMUSG00000031503,ENSMUSG00000031503	15674.9	14283.1	17066.7	0.256859	6.79621e-06	0.000948333
ENSMUSG00000018677	chr11	102402985	102407946	-	Slc25a39	protein_coding	A2A697,B0QZI3,B0QZI4,B0QZI5,B0QZI6,B0QZI7,D6RDT5,D6RE23,F6S0J8,Q9D8K8 Q3TTM8	A2A697_MOUSE,B0QZI3_MOUSE,B0QZI4_MOUSE,B0QZI5_MOUSE,B0QZI6_MOUSE,B0QZI7_MOUSE,D6RDT5_MOUSE,D6RE23_MOUSE,F6S0J8_MOUSE,S2539_MOUSE	Solute carrier family 25 member 39,Solute carrier family 25 member 39,Solute carrier family 25 member 39,Solute carrier family 25 member 39,Solute carrier family 25 member 39,Solute carrier family 25 member 39,Solute carrier family 25 member 39,Solute carrier family 25 member 39,Solute carrier family 25 member 39,Solute carrier family 25 member 39	Slc25a39,Slc25a39,Slc25a39,Slc25a39,Slc25a39,Slc25a39,Slc25a39,Slc25a39,Slc25a39,Slc25a39 D11Ertd333e	ENSMUST00000107098,ENSMUST00000155104,ENSMUST00000149777,ENSMUST00000130436,ENSMUST00000124755,ENSMUST00000154001,ENSMUST00000134669,ENSMUST00000142097,ENSMUST00000128825,ENSMUST00000018821	ENSMUSP00000102715,ENSMUSP00000115445,ENSMUSP00000115365,ENSMUSP00000115087,ENSMUSP00000120021,ENSMUSP00000116336,ENSMUSP00000114481,ENSMUSP00000114365,ENSMUSP00000121790,ENSMUSP00000018821	ENSMUSG00000018677,ENSMUSG00000018677,ENSMUSG00000018677,ENSMUSG00000018677,ENSMUSG00000018677,ENSMUSG00000018677,ENSMUSG00000018677,ENSMUSG00000018677,ENSMUSG00000018677,ENSMUSG00000018677	2452.74	2234.93	2670.55	0.256802	0.000727524	0.0306914
ENSMUSG00000028517	chr4	105157347	105232764	+	Ppap2b	protein_coding	Q99JY8 Q3TVM4 Q3TXR7 Q8BTB7	LPP3_MOUSE	Lipid phosphate phosphohydrolase 3	Ppap2b Lpp3	ENSMUST00000064139	ENSMUSP00000065719	ENSMUSG00000028517	3244.78	2956.79	3532.78	0.256692	0.000346201	0.0169507
ENSMUSG00000002980	chr7	19756131	19771016	-	Bcam	protein_coding	D3YTK7,D6RE44,Q9R069 Q9ESS5 Q9JKB2	D3YTK7_MOUSE,D6RE44_MOUSE,BCAM_MOUSE	Basal cell adhesion molecule,Basal cell adhesion molecule,Basal cell adhesion molecule	Bcam,Bcam,Bcam Gplu Lu	ENSMUST00000155244,ENSMUST00000133427,ENSMUST00000003061	ENSMUSP00000121145,ENSMUSP00000117998,ENSMUSP00000003061	ENSMUSG00000002980,ENSMUSG00000002980,ENSMUSG00000002980	14022.7	12786.8	15258.6	0.254954	4.54988e-06	0.000728249
ENSMUSG00000024096	chr17	65848433	65885755	-	Ralbp1	protein_coding	Q62172 Q6NXH5 Q9CRE5	RBP1_MOUSE	RalA-binding protein 1	Ralbp1 Rip1	ENSMUST00000024905 ENSMUST00000166543	ENSMUSP00000024905	ENSMUSG00000024096	3622.44	3303.13	3941.75	0.254931	0.000401308	0.0193267
ENSMUSG00000020183	chr10	117629500	117687352	+	Cpm	protein_coding	Q80V42 Q497S5 Q9CYH8	CBPM_MOUSE	Carboxypeptidase M	Cpm	ENSMUST00000020399	ENSMUSP00000020399	ENSMUSG00000020183	4463.28	4071.74	4854.82	0.253715	0.000591772	0.0265055
ENSMUSG00000039382	chrX	7721973	7728201	+	Wdr45	protein_coding	A2AEV2,A2AEV5,F6Q8K5,F6QP00,F6YHS5,F7CAT9,Q91VM3 A2AEV3 A2AEV4 Q9CVF7 Q9JIG9,S4R186	A2AEV2_MOUSE,A2AEV5_MOUSE,F6Q8K5_MOUSE,F6QP00_MOUSE,F6YHS5_MOUSE,F7CAT9_MOUSE,WIPI4_MOUSE,S4R186_MOUSE	WD repeat domain phosphoinositide-interacting protein 4,WD repeat domain phosphoinositide-interacting protein 4,WD repeat domain phosphoinositide-interacting protein 4,WD repeat domain phosphoinositide-interacting protein 4,WD repeat domain phosphoinositide-interacting protein 4,WD repeat domain phosphoinositide-interacting protein 4,WD repeat domain phosphoinositide-interacting protein 4,WD repe…	Wdr45,Wdr45,Wdr45,Wdr45,Wdr45,Wdr45,Wdr45 DXImx38e Wdrx1 Wipi4,Wdr45	ENSMUST00000116633,ENSMUST00000116634,ENSMUST00000156000,ENSMUST00000125991,ENSMUST00000131077,ENSMUST00000148624,ENSMUST00000043045 ENSMUST00000115687 ENSMUST00000115688 ENSMUST00000115689,ENSMUST00000154253	ENSMUSP00000112332,ENSMUSP00000112333,ENSMUSP00000121634,ENSMUSP00000119766,ENSMUSP00000117784,ENSMUSP00000122086,ENSMUSP00000041456,ENSMUSP00000138122	ENSMUSG00000039382,ENSMUSG00000039382,ENSMUSG00000039382,ENSMUSG00000039382,ENSMUSG00000039382,ENSMUSG00000039382,ENSMUSG00000039382,ENSMUSG00000039382	4000.42	3649.58	4351.26	0.25364	0.000428657	0.0204627
ENSMUSG00000032473	chr9	99689461	99717267	-	Cldn18	protein_coding	P56857 Q91ZY9 Q91ZZ0 Q91ZZ1	CLD18_MOUSE	Claudin-18	Cldn18	ENSMUST00000035048 ENSMUST00000112882 ENSMUST00000131922 ENSMUST00000136429	ENSMUSP00000035048	ENSMUSG00000032473	13907.6	12689.6	15125.6	0.253333	6.20721e-05	0.00507964
ENSMUSG00000021069	chr12	70190811	70231488	-	Pygl	protein_coding	Q3UEJ6,Q9ET01 Q3UKJ0	Q3UEJ6_MOUSE,PYGL_MOUSE	Phosphorylase,Glycogen phosphorylase, liver form	Pygl,Pygl	ENSMUST00000161083,ENSMUST00000071250	ENSMUSP00000125585,ENSMUSP00000071231	ENSMUSG00000021069,ENSMUSG00000021069	4156.69	3794.65	4518.73	0.251889	0.000155235	0.0096547
ENSMUSG00000004558	chr14	51905271	51913488	-	Ndrg2	protein_coding	Q9QYG0 Q3TI48 Q3TY42 Q3U3T5 Q69ZN2 Q8C661	NDRG2_MOUSE	Protein NDRG2	Ndrg2 Kiaa1248 Ndr2	ENSMUST00000004673 ENSMUST00000111632	ENSMUSP00000004673	ENSMUSG00000004558	3092.67	2825.53	3359.82	0.249779	0.0011488	0.0407282
ENSMUSG00000049866	chr1	88673125	88702221	-	Arl4c	protein_coding	P61208	ARL4C_MOUSE	ADP-ribosylation factor-like protein 4C	Arl4c Arl7	ENSMUST00000051236 ENSMUST00000159814	ENSMUSP00000057085	ENSMUSG00000049866	2273.93	2078.52	2469.35	0.248462	0.00122801	0.0427018
ENSMUSG00000004665	chr10	79988584	79996062	+	Cnn2	protein_coding	D3Z7R6,Q08093	D3Z7R6_MOUSE,CNN2_MOUSE	Calponin-2,Calponin-2	Cnn2,Cnn2	ENSMUST00000105374,ENSMUST00000004784	ENSMUSP00000101013,ENSMUSP00000004784	ENSMUSG00000004665,ENSMUSG00000004665	11456.4	10473.7	12439.1	0.248092	0.000134053	0.00868472
ENSMUSG00000004044	chr11	100956733	100970887	-	Ptrf	protein_coding	O54724 Q2TAW6	PTRF_MOUSE	Polymerase I and transcript release factor	Ptrf	ENSMUST00000060792	ENSMUSP00000058321	ENSMUSG00000004044	15556.3	14227	16885.6	0.247149	0.00015315	0.00957977
ENSMUSG00000040151	chr3	144429706	144570181	-	Hs2st1	protein_coding	E0CYX6,Q8R3H7 O88464 Q3TNP7 Q9JLK2	E0CYX6_MOUSE,HS2ST_MOUSE	Heparan sulfate 2-O-sulfotransferase 1,Heparan sulfate 2-O-sulfotransferase 1	Hs2st1,Hs2st1 Hs2st	ENSMUST00000160690,ENSMUST00000043325	ENSMUSP00000123816,ENSMUSP00000043066	ENSMUSG00000040151,ENSMUSG00000040151	4543.53	4156.63	4930.43	0.246246	0.000326986	0.0163926
ENSMUSG00000031239	chrX	107397099	107403376	-	Itm2a	protein_coding	Q61500 Q3TJP5 Q8K0H4 Q9CRW4	ITM2A_MOUSE	Integral membrane protein 2A	Itm2a E25 Itm2	ENSMUST00000033591	ENSMUSP00000033591	ENSMUSG00000031239	4273.72	3917.28	4630.16	0.241155	0.000292089	0.0151649
ENSMUSG00000022048	chr14	66802864	66868688	-	Dpysl2	protein_coding	O08553 Q6P5D0	DPYL2_MOUSE	Dihydropyrimidinase-related protein 2	Dpysl2 Crmp2 Ulip2	ENSMUST00000022629	ENSMUSP00000022629	ENSMUSG00000022048	4106.97	3767.93	4446.02	0.238684	0.00142007	0.0468365
ENSMUSG00000025786	chr9	123066160	123113205	-	Zdhhc3	protein_coding	D3Z2A6,D6RDS4,D6RFV6,D6RHA3,D6RHS2,F6Q2M4,Q05D46,Q8R173 Q6EMK3	D3Z2A6_MOUSE,D6RDS4_MOUSE,D6RFV6_MOUSE,D6RHA3_MOUSE,D6RHS2_MOUSE,F6Q2M4_MOUSE,Q05D46_MOUSE,ZDHC3_MOUSE	Palmitoyltransferase ZDHHC3,Palmitoyltransferase ZDHHC3 Zinc finger, DHHC domain containing 3, isoform CRA_a,Palmitoyltransferase ZDHHC3,Palmitoyltransferase ZDHHC3 Zinc finger, DHHC domain containing 3, isoform CRA_e,Palmitoyltransferase ZDHHC3 Zinc finger, DHHC domain containing 3, isoform CRA_b,Palmitoyltransferase ZDHHC3,Palmitoyltransferase ZDHHC3 Zdhhc3 protein Zinc finger, DHHC domain cont…	Zdhhc3,Zdhhc3 mCG_117266,Zdhhc3,Zdhhc3 mCG_117266,Zdhhc3 mCG_117266,Zdhhc3,Zdhhc3 mCG_117266,Zdhhc3 Godz Gramp1	ENSMUST00000130717,ENSMUST00000123937 ENSMUST00000138622,ENSMUST00000140497,ENSMUST00000026892 ENSMUST00000150679,ENSMUST00000152396,ENSMUST00000129862,ENSMUST00000155778,ENSMUST00000147563	ENSMUSP00000121712,ENSMUSP00000114613,ENSMUSP00000122604,ENSMUSP00000026892,ENSMUSP00000116222,ENSMUSP00000119360,ENSMUSP00000119416,ENSMUSP00000117392	ENSMUSG00000025786,ENSMUSG00000025786,ENSMUSG00000025786,ENSMUSG00000025786,ENSMUSG00000025786,ENSMUSG00000025786,ENSMUSG00000025786,ENSMUSG00000025786	4293.34	3944.98	4641.7	0.234582	0.000560612	0.0253183
ENSMUSG00000035493	chr13	56609603	56639339	+	Tgfbi	protein_coding	P82198 Q3U9R1	BGH3_MOUSE	Transforming growth factor-beta-induced protein ig-h3	Tgfbi	ENSMUST00000045173	ENSMUSP00000037719	ENSMUSG00000035493	6689.99	6147.37	7232.61	0.234512	0.000534154	0.0246344
ENSMUSG00000038235	chr1	171437535	171464603	+	F11r	protein_coding	O88792 Q8VC39	JAM1_MOUSE	Junctional adhesion molecule A	F11r Jam1 Jcam Jcam1	ENSMUST00000043839	ENSMUSP00000041907	ENSMUSG00000038235	3962.38	3641.49	4283.26	0.234122	0.000821029	0.0330132
ENSMUSG00000032231	chr9	69453620	69491795	+	Anxa2	protein_coding	B0V2N5,B0V2N7,B0V2N8,P07356	B0V2N5_MOUSE,B0V2N7_MOUSE,B0V2N8_MOUSE,ANXA2_MOUSE	Annexin,Annexin,Annexin,Annexin A2	Anxa2,Anxa2,Anxa2,Anxa2 Anx2 Cal1h	ENSMUST00000136282,ENSMUST00000123470,ENSMUST00000134907,ENSMUST00000034756	ENSMUSP00000117855,ENSMUSP00000122175,ENSMUSP00000117979,ENSMUSP00000034756	ENSMUSG00000032231,ENSMUSG00000032231,ENSMUSG00000032231,ENSMUSG00000032231	17161.4	15776.4	18546.3	0.23335	0.000300207	0.0154125
ENSMUSG00000022175	chr14	54464164	54471497	+	Lrp10	protein_coding	Q7TQH7 Q3UNT0 Q7TS95 Q921T0 Q9EPE8	LRP10_MOUSE	Low-density lipoprotein receptor-related protein 10	Lrp10 Lrp9	ENSMUST00000022782	ENSMUSP00000022782	ENSMUSG00000022175	2672.93	2457.72	2888.14	0.232731	0.00139639	0.0464779
ENSMUSG00000074227	chr7	29256331	29281977	-	Spint2	protein_coding	Q9WU03 Q5D0F2 Q9WU04 Q9WU05	SPIT2_MOUSE	Kunitz-type protease inhibitor 2	Spint2 Hai2	ENSMUST00000098604 ENSMUST00000108236	ENSMUSP00000096204	ENSMUSG00000074227	3350.56	3081.16	3619.97	0.232438	0.00103577	0.0378299
ENSMUSG00000022108	chr14	73362231	73385271	-	Itm2b	protein_coding	O89051 Q545S7	ITM2B_MOUSE	Integral membrane protein 2B	Itm2b	ENSMUST00000022704	ENSMUSP00000022704	ENSMUSG00000022108	13310.7	12242	14379.4	0.232146	0.000258565	0.0139318
ENSMUSG00000050708	chr7	45457944	45459884	-	Ftl1	protein_coding	H3BKD3	H3BKD3_MOUSE	Ferritin	Ftl1	ENSMUST00000135869	ENSMUSP00000135345	ENSMUSG00000050708	7061.4	6500.43	7622.37	0.229671	0.000614767	0.0270514
ENSMUSG00000024091	chr17	65580056	65613555	-	Vapa	protein_coding	Q9WV55 Q3TJM1 Q9QY77	VAPA_MOUSE	Vesicle-associated membrane protein-associated protein A	Vapa Vap33	ENSMUST00000024897	ENSMUSP00000024897	ENSMUSG00000024091	3640.06	3351.55	3928.58	0.229117	0.00114042	0.0406961
ENSMUSG00000020592	chr12	8771323	8793715	+	Sdc1	protein_coding	E0CYT6,P18828 Q62278 Q9WVD2	E0CYT6_MOUSE,SDC1_MOUSE	Syndecan-1,Syndecan-1	Sdc1,Sdc1 Synd-1 Synd1	ENSMUST00000161883,ENSMUST00000020911 ENSMUST00000171158	ENSMUSP00000123896,ENSMUSP00000020911	ENSMUSG00000020592,ENSMUSG00000020592	5647.32	5201.44	6093.2	0.228249	0.00129289	0.0439746
ENSMUSG00000030536	chr7	80711583	80803331	-	Iqgap1	protein_coding	Q9JKF1 G3UW45	IQGA1_MOUSE	Ras GTPase-activating-like protein IQGAP1	Iqgap1	ENSMUST00000167377	ENSMUSP00000128278	ENSMUSG00000030536	15972	14720.8	17223.2	0.226485	6.13295e-05	0.0050569
ENSMUSG00000026473	chr1	153899944	153909723	+	Glul	protein_coding	D3YVK1,D3Z121,P15105 Q3TRK7 Q64432 Q91VC6	D3YVK1_MOUSE,D3Z121_MOUSE,GLNA_MOUSE	Glutamine synthetase,Glutamine synthetase,Glutamine synthetase	Glul,Glul,Glul Glns	ENSMUST00000139476,ENSMUST00000140685,ENSMUST00000086199	ENSMUSP00000114377,ENSMUSP00000123157,ENSMUSP00000083375	ENSMUSG00000026473,ENSMUSG00000026473,ENSMUSG00000026473	4693.89	4331.37	5056.41	0.223243	0.000883597	0.0341031
ENSMUSG00000029713	chr5	137528127	137533510	-	Gnb2	protein_coding	D3YZX3,D3Z1M1,D3Z1T4,E9PWM7,E9QKR0,P62880 P11016 P54312	D3YZX3_MOUSE,D3Z1M1_MOUSE,D3Z1T4_MOUSE,E9PWM7_MOUSE,E9QKR0_MOUSE,GBB2_MOUSE	Guanine nucleotide-binding protein G(I)/G(S)/G(T) subunit beta-2,Guanine nucleotide-binding protein G(I)/G(S)/G(T) subunit beta-2,Guanine nucleotide-binding protein G(I)/G(S)/G(T) subunit beta-2,Guanine nucleotide-binding protein G(I)/G(S)/G(T) subunit beta-2,Guanine nucleotide-binding protein G(I)/G(S)/G(T) subunit beta-2,Guanine nucleotide-binding protein G(I)/G(S)/G(T) subunit beta-2	Gnb2,Gnb2,Gnb2,Gnb2,Gnb2,Gnb2	ENSMUST00000111020 ENSMUST00000111023 ENSMUST00000170293,ENSMUST00000132525,ENSMUST00000140139,ENSMUST00000143495 ENSMUST00000168746,ENSMUST00000111027,ENSMUST00000031726 ENSMUST00000150063	ENSMUSP00000106649,ENSMUSP00000119725,ENSMUSP00000121942,ENSMUSP00000126823,ENSMUSP00000106656,ENSMUSP00000031726	ENSMUSG00000029713,ENSMUSG00000029713,ENSMUSG00000029713,ENSMUSG00000029713,ENSMUSG00000029713,ENSMUSG00000029713	7613.29	7042.23	8184.34	0.216805	0.00060243	0.0267526
ENSMUSG00000024042	chr17	31844248	31855792	-	Sik1	protein_coding	Q60670 Q3UR46	SIK1_MOUSE	Serine/threonine-protein kinase SIK1	Sik1 Msk Sik Snf1lk	ENSMUST00000024839	ENSMUSP00000024839	ENSMUSG00000024042	4923.97	4554.75	5293.2	0.216725	0.00152757	0.0490443
ENSMUSG00000029455	chr5	121566027	121593824	-	Aldh2	protein_coding	D3YYF3,P47738	D3YYF3_MOUSE,ALDH2_MOUSE	Aldehyde dehydrogenase, mitochondrial,Aldehyde dehydrogenase, mitochondrial	Aldh2,Aldh2 Ahd-1 Ahd1	ENSMUST00000152945,ENSMUST00000031411	ENSMUSP00000123545,ENSMUSP00000031411	ENSMUSG00000029455,ENSMUSG00000029455	8581.3	7938.91	9223.68	0.216376	0.00155425	0.0494635
ENSMUSG00000007891	chr7	142371148	142388038	-	Ctsd	protein_coding	F6Y6L6,F8WIR1,P18242	F6Y6L6_MOUSE,F8WIR1_MOUSE,CATD_MOUSE	Cathepsin D,Cathepsin D,Cathepsin D	Ctsd,Ctsd,Ctsd	ENSMUST00000133843,ENSMUST00000066401,ENSMUST00000151120	ENSMUSP00000117247,ENSMUSP00000063904,ENSMUSP00000121203	ENSMUSG00000007891,ENSMUSG00000007891,ENSMUSG00000007891	6353.64	5880.2	6827.09	0.215374	0.00123572	0.0427891
ENSMUSG00000027803	chr3	57455649	57575910	-	Wwtr1	protein_coding	Q9EPK5 Q3UQ69 Q3UQM0 Q99KI4	a	WW domain-containing transcription regulator protein 1	Wwtr1 Taz	ENSMUST00000029380 ENSMUST00000120977	ENSMUSP00000029380	ENSMUSG00000027803	6749.06	6249.33	7248.78	0.214005	0.000740434	0.0311154
ENSMUSG00000020917	chr11	100476353	100528000	-	Acly	protein_coding	Q3TS02,Q3V117,Q91V92	Q3TS02_MOUSE,Q3V117_MOUSE,ACLY_MOUSE	ATP-citrate synthase,ATP-citrate synthase,ATP-citrate synthase	Acly,Acly,Acly	ENSMUST00000107385,ENSMUST00000107389,ENSMUST00000007131 ENSMUST00000165111	ENSMUSP00000103008,ENSMUSP00000103012,ENSMUSP00000007131	ENSMUSG00000020917,ENSMUSG00000020917,ENSMUSG00000020917	5959.84	5518.81	6400.87	0.213874	0.000681479	0.0290871
ENSMUSG00000040998	chr3	132881745	132950291	-	Npnt	protein_coding	D3YTX1,D3Z4D3,Q91V88 Q6NV58 Q80VP6 Q91XL5 Q91ZD3 Q923T5	D3YTX1_MOUSE,D3Z4D3_MOUSE,NPNT_MOUSE	Nephronectin,Nephronectin,Nephronectin	Npnt,Npnt,Npnt Neph1 Poem	ENSMUST00000117456,ENSMUST00000117811,ENSMUST00000042729 ENSMUST00000042744 ENSMUST00000093971 ENSMUST00000117164	ENSMUSP00000112816,ENSMUSP00000113752,ENSMUSP00000040071	ENSMUSG00000040998,ENSMUSG00000040998,ENSMUSG00000040998	13798.5	12778.8	14818.2	0.213602	0.000918624	0.0350818
ENSMUSG00000022892	chr16	84954440	85173707	-	App	protein_coding	P12023 P97487 P97942 Q99K32	A4_MOUSE	Amyloid beta A4 protein	App	ENSMUST00000005406	ENSMUSP00000005406	ENSMUSG00000022892	17157.7	15896.7	18418.7	0.212432	0.000100165	0.00717237
ENSMUSG00000038393	chr3	96557957	96561883	+	Txnip	protein_coding	Q8BG60 Q8BGQ0 Q8K2B2 Q9DC00 Q9EP90 Q9R115	TXNIP_MOUSE	Thioredoxin-interacting protein	Txnip Vdup1	ENSMUST00000049093 ENSMUST00000074519	ENSMUSP00000041467	ENSMUSG00000038393	8837.5	8189.98	9485.03	0.211768	0.00125937	0.0431037
ENSMUSG00000052397	chr17	6738041	6782784	-	Ezr	protein_coding	P26040 Q80ZT8 Q9DCI1	EZRI_MOUSE	Ezrin	Ezr Vil2	ENSMUST00000064234	ENSMUSP00000063734	ENSMUSG00000052397	5486.18	5088.08	5884.27	0.209705	0.000751234	0.0314478
ENSMUSG00000062825	chr11	120345690	120348542	-	Actg1	protein_coding	B1ATY1,F8WGM8,G3UYG0,G3UZ07,P63260 P02571 P14104 P99022	B1ATY1_MOUSE,F8WGM8_MOUSE,G3UYG0_MOUSE,G3UZ07_MOUSE,ACTG_MOUSE	Actin, cytoplasmic 2,Actin, cytoplasmic 2,Actin, cytoplasmic 2,Actin, cytoplasmic 2,Actin, cytoplasmic 2	Actg1,Actg1,Actg1,Actg1,Actg1 Actg	ENSMUST00000062147,ENSMUST00000089616,ENSMUST00000131103,ENSMUST00000128055,ENSMUST00000071555 ENSMUST00000106215	ENSMUSP00000101821,ENSMUSP00000087043,ENSMUSP00000134070,ENSMUSP00000134296,ENSMUSP00000071486	ENSMUSG00000062825,ENSMUSG00000062825,ENSMUSG00000062825,ENSMUSG00000062825,ENSMUSG00000062825	4941.49	4585.6	5297.39	0.208129	0.00123838	0.0427891
ENSMUSG00000029309	chr5	104079111	104113733	-	Sparcl1	protein_coding	P70663 E9QPH2 P97810 Q99L82	SPRL1_MOUSE	SPARC-like protein 1	Sparcl1 Ecm2 Sc1	ENSMUST00000031249	ENSMUSP00000031249	ENSMUSG00000029309	20009.5	18584.3	21434.7	0.205856	0.00020993	0.0120893
ENSMUSG00000029426	chr5	92441314	92506833	-	Scarb2	protein_coding	O35114 Q3UNF8	SCRB2_MOUSE	Lysosome membrane protein 2	Scarb2	ENSMUST00000031377	ENSMUSP00000031377	ENSMUSG00000029426	5072.68	4711.83	5433.52	0.20556	0.00127054	0.0433496
ENSMUSG00000020241	chr10	76595762	76623630	-	Col6a2	protein_coding	D3Z7D5,Q02788 Q05505 Q8C972 Q8K229	D3Z7D5_MOUSE,CO6A2_MOUSE	Collagen alpha-2(VI) chain,Collagen alpha-2(VI) chain	Col6a2,Col6a2	ENSMUST00000105413,ENSMUST00000001181	ENSMUSP00000101053,ENSMUSP00000001181	ENSMUSG00000020241,ENSMUSG00000020241	22412.6	20835.1	23990.1	0.203414	0.000203526	0.0117828
ENSMUSG00000033295	chr4	118208213	118291405	-	Ptprf	protein_coding	A2A8L5 Q6PG86 Q9EQ17,F6S1X8,F6Y3V0	PTPRF_MOUSE,F6S1X8_MOUSE,F6Y3V0_MOUSE	Receptor-type tyrosine-protein phosphatase F,Receptor-type tyrosine-protein phosphatase F,Receptor-type tyrosine-protein phosphatase F	Ptprf Lar,Ptprf,Ptprf	ENSMUST00000049074,ENSMUST00000124758,ENSMUST00000150096	ENSMUSP00000039368,ENSMUSP00000119954,ENSMUSP00000117313	ENSMUSG00000033295,ENSMUSG00000033295,ENSMUSG00000033295	14611.2	13609	15613.4	0.198204	0.000773836	0.0320245
ENSMUSG00000004897	chr3	87906321	87916132	+	Hdgf	protein_coding	E0CXA0,E0CYW7,P51859 Q8BPG7 Q9CYA4 Q9JK87	E0CXA0_MOUSE,E0CYW7_MOUSE,HDGF_MOUSE	Hepatoma-derived growth factor,Hepatoma-derived growth factor,Hepatoma-derived growth factor	Hdgf,Hdgf,Hdgf Tdrm1	ENSMUST00000159492,ENSMUST00000162631,ENSMUST00000005017	ENSMUSP00000124803,ENSMUSP00000123832,ENSMUSP00000005017	ENSMUSG00000004897,ENSMUSG00000004897,ENSMUSG00000004897	8164.15	7611.22	8717.08	0.195692	0.00141373	0.0468365
ENSMUSG00000001119	chr10	76708792	76726168	-	Col6a1	protein_coding	Q04857	CO6A1_MOUSE	Collagen alpha-1(VI) chain	Col6a1	ENSMUST00000001147	ENSMUSP00000001147	ENSMUSG00000001119	17660.8	16483.6	18837.9	0.192601	0.000979365	0.0361336
ENSMUSG00000031207	chrX	96096042	96168552	+	Msn	protein_coding	P26041 B1AX70 Q3UL28 Q8BSN4	MOES_MOUSE	Moesin	Msn	ENSMUST00000117399	ENSMUSP00000113071	ENSMUSG00000031207	14773.6	13805.7	15741.6	0.189303	0.00152543	0.0490443
ENSMUSG00000040856	chr12	109452823	109463336	+	Dlk1	protein_coding	B4YB46 E9PVN2,B4YB48,E9PVN3,G3UWU8,G3UX30,G3UZ17,Q925U3,Q9DAU5	B4YB46_MOUSE,B4YB48_MOUSE,E9PVN3_MOUSE,G3UWU8_MOUSE,G3UX30_MOUSE,G3UZ17_MOUSE,Q925U3_MOUSE,Q9DAU5_MOUSE	Dlk1 Protein delta homolog 1,Dlk1 Protein delta homolog 1,Protein delta homolog 1,Protein delta homolog 1,Protein delta homolog 1,Protein delta homolog 1,Delta-like Delta-like 1 homolog (Drosophila) Dlk (Delta like) Dlk1 protein Protein delta homolog 1,Protein delta homolog 1	Dlk1,Dlk1,Dlk1,Dlk1,Dlk1,Dlk1,Dlk1 dlk mCG_13045,Dlk1	ENSMUST00000109842,ENSMUST00000109846,ENSMUST00000109841,ENSMUST00000173539,ENSMUST00000124293,ENSMUST00000173812,ENSMUST00000056110 ENSMUST00000109844,ENSMUST00000109843	ENSMUSP00000105468,ENSMUSP00000105472,ENSMUSP00000105467,ENSMUSP00000133430,ENSMUSP00000133530,ENSMUSP00000134308,ENSMUSP00000063104,ENSMUSP00000105469	ENSMUSG00000040856,ENSMUSG00000040856,ENSMUSG00000040856,ENSMUSG00000040856,ENSMUSG00000040856,ENSMUSG00000040856,ENSMUSG00000040856,ENSMUSG00000040856	15404.8	14405.3	16404.4	0.187468	0.000793203	0.0327016
ENSMUSG00000029580	chr5	142903115	142906754	-	Actb	protein_coding	E9Q1F2,E9Q2D1,E9Q5F4,E9Q606,P60710 P02570 P70514 P99021 Q11211 Q3TI89 Q3TVP6 Q64316 Q6ZWM3	E9Q1F2_MOUSE,E9Q2D1_MOUSE,E9Q5F4_MOUSE,E9Q606_MOUSE,ACTB_MOUSE	Actin, cytoplasmic 1,Actin, cytoplasmic 1,Actin, cytoplasmic 1,Actin, cytoplasmic 1,Actin, cytoplasmic 1	Actb,Actb,Actb,Actb,Actb	ENSMUST00000167721,ENSMUST00000163829,ENSMUST00000171419,ENSMUST00000106216,ENSMUST00000100497	ENSMUSP00000127663,ENSMUSP00000132135,ENSMUSP00000130611,ENSMUSP00000101823,ENSMUSP00000098066	ENSMUSG00000029580,ENSMUSG00000029580,ENSMUSG00000029580,ENSMUSG00000029580,ENSMUSG00000029580	50825.7	47583.9	54067.5	0.184286	0.00109068	0.0394384
ENSMUSG00000013236	chr17	56412431	56476483	-	Ptprs	protein_coding	B0V2N1 Q3TEC3 Q3TXC9 Q4JFC7 Q5XJV4 Q64503 Q64699 Q7TT17	PTPRS_MOUSE	Receptor-type tyrosine-protein phosphatase S	Ptprs	ENSMUST00000067538 ENSMUST00000086828	ENSMUSP00000064048	ENSMUSG00000013236	7748.52	8297.01	7200.04	-0.204559	0.00137856	0.0460251
ENSMUSG00000034160	chrX	101640060	101684351	+	Ogt	protein_coding	Q8CGY8 A2ALY1 Q6PG10 Q8BXH6 Q91Y38	OGT1_MOUSE	UDP-N-acetylglucosamine--peptide N-acetylglucosaminyltransferase 110 kDa subunit	Ogt	ENSMUST00000044475 ENSMUST00000119299	ENSMUSP00000045409	ENSMUSG00000034160	24599.4	26353.8	22845	-0.206125	0.0010085	0.0369579
ENSMUSG00000017421	chr11	80383279	80405733	+	Zfp207	protein_coding	B1AQG7,M0QWF0,Q8CCB2,Q9JMD0 E9PW12 Q99LA2 Q9Z326	B1AQG7_MOUSE,M0QWF0_MOUSE,Q8CCB2_MOUSE,ZN207_MOUSE	BUB3-interacting and GLEBS motif-containing protein ZNF207,BUB3-interacting and GLEBS motif-containing protein ZNF207,BUB3-interacting and GLEBS motif-containing protein ZNF207,BUB3-interacting and GLEBS motif-containing protein ZNF207	Zfp207,Zfp207,Zfp207,Znf207 Bugz Zep Zfp207	ENSMUST00000153824,ENSMUST00000123726,ENSMUST00000108216,ENSMUST00000017567 ENSMUST00000053740 ENSMUST00000165565 ENSMUST00000178665	ENSMUSP00000115924,ENSMUSP00000137795,ENSMUSP00000103851,ENSMUSP00000017567	ENSMUSG00000017421,ENSMUSG00000017421,ENSMUSG00000017421,ENSMUSG00000017421	11708.8	12564.3	10853.3	-0.211184	0.000223826	0.0125573
ENSMUSG00000026153	chr1	24011093	24100341	-	Fam135a	protein_coding	Q6NS59 Q3UEW1 Q5XK31 Q8BXS8 Q8BZL9 Q8K2K2 Q9D2J6	F135A_MOUSE	Protein FAM135A	Fam135a	ENSMUST00000027337	ENSMUSP00000027337	ENSMUSG00000026153	3563.94	3846.7	3281.17	-0.229343	0.00150295	0.0485403
ENSMUSG00000032253	chr9	82866159	82975516	-	Phip	protein_coding	F8VQ93	F8VQ93_MOUSE	PH-interacting protein	Phip	ENSMUST00000034787	ENSMUSP00000034787	ENSMUSG00000032253	5839.47	6304.35	5374.59	-0.230152	0.000827929	0.0330132
ENSMUSG00000028248	chr4	21847583	21876475	+	Pnisr	protein_coding	A2AJT3,A2AJT4 Q9CS92,A2AJT5	A2AJT3_MOUSE,PNISR_MOUSE,A2AJT5_MOUSE	Arginine/serine-rich protein PNISR MCG2929, isoform CRA_a,Arginine/serine-rich protein PNISR,Arginine/serine-rich protein PNISR	Sfrs18 mCG_2929,Pnisr Sfrs18 Srrp130,Sfrs18	ENSMUST00000108229 ENSMUST00000185001,ENSMUST00000098238,ENSMUST00000029911	ENSMUSP00000103864,ENSMUSP00000095840,ENSMUSP00000029911	ENSMUSG00000028248,ENSMUSG00000028248,ENSMUSG00000028248	13847.2	14968.3	12726	-0.234117	0.000650418	0.0279808
ENSMUSG00000059049	chr4	82897920	83052339	-	Frem1	protein_coding	E9Q5Z7,F7D5I3,Q684R7 Q5H8C2 Q5M7B3 Q8C732	E9Q5Z7_MOUSE,F7D5I3_MOUSE,FREM1_MOUSE	FRAS1-related extracellular matrix protein 1,FRAS1-related extracellular matrix protein 1,FRAS1-related extracellular matrix protein 1	Frem1,Frem1,Frem1	ENSMUST00000170248,ENSMUST00000127886,ENSMUST00000071708 ENSMUST00000107230	ENSMUSP00000125809,ENSMUSP00000122467,ENSMUSP00000071627	ENSMUSG00000059049,ENSMUSG00000059049,ENSMUSG00000059049	10986.6	11879.3	10094	-0.234925	0.000467766	0.0221355
ENSMUSG00000027677	chr3	33799832	33814860	+	Ttc14	protein_coding	A6H6N9,D3Z098,D6REG1,E9PXW3,E9Q982,F6RTH5,G3X9T5,Q9CSP9 Q69Z51 Q8BRX6 Q8CD24 Q8CDF8 Q8R3Q9	A6H6N9_MOUSE,D3Z098_MOUSE,D6REG1_MOUSE,E9PXW3_MOUSE,E9Q982_MOUSE,F6RTH5_MOUSE,G3X9T5_MOUSE,TTC14_MOUSE	MCG123425, isoform CRA_e Tetratricopeptide repeat domain 14 Tetratricopeptide repeat protein 14,Tetratricopeptide repeat protein 14,MCG123425, isoform CRA_f Tetratricopeptide repeat protein 14,Tetratricopeptide repeat protein 14,Tetratricopeptide repeat protein 14,Tetratricopeptide repeat protein 14,MCG123425, isoform CRA_b Tetratricopeptide repeat protein 14,Tetratricopeptide repeat protein 14	Ttc14 mCG_123425,Ttc14,Ttc14 mCG_123425,Ttc14,Ttc14,Ttc14,Ttc14 mCG_123425,Ttc14 Kiaa1980	ENSMUST00000099153,ENSMUST00000139880,ENSMUST00000150294,ENSMUST00000117915,ENSMUST00000142280,ENSMUST00000127513,ENSMUST00000108210,ENSMUST00000076916	ENSMUSP00000096757,ENSMUSP00000115457,ENSMUSP00000117811,ENSMUSP00000112450,ENSMUSP00000119299,ENSMUSP00000121841,ENSMUSP00000103845,ENSMUSP00000076184	ENSMUSG00000027677,ENSMUSG00000027677,ENSMUSG00000027677,ENSMUSG00000027677,ENSMUSG00000027677,ENSMUSG00000027677,ENSMUSG00000027677,ENSMUSG00000027677	6521.57	7058.59	5984.55	-0.2381	0.000639508	0.0276206
ENSMUSG00000035967	chrX	56454857	56507843	+	Ddx26b	protein_coding	E9PXU1,F6RIR5,F6WNG1,Q8BND4	E9PXU1_MOUSE,F6RIR5_MOUSE,F6WNG1_MOUSE,DX26B_MOUSE	Protein DDX26B,Protein DDX26B,Protein DDX26B,Protein DDX26B	Ddx26b,Ddx26b,Ddx26b,Ddx26b	ENSMUST00000101553,ENSMUST00000142624,ENSMUST00000143142,ENSMUST00000039374 ENSMUST00000132428	ENSMUSP00000099089,ENSMUSP00000119095,ENSMUSP00000118865,ENSMUSP00000035379	ENSMUSG00000035967,ENSMUSG00000035967,ENSMUSG00000035967,ENSMUSG00000035967	6937.97	7509.8	6366.15	-0.238318	0.000816503	0.0330132
ENSMUSG00000003847	chr8	107293470	107379517	+	Nfat5	protein_coding	D6RH40,D6RH97,F6VCW7,F6ZRF0,Q80TR0,Q9WV30 E9Q0P3 E9Q6U2 G5E8N9 Q91WY0 Q9JLA1	D6RH40_MOUSE,D6RH97_MOUSE,F6VCW7_MOUSE,F6ZRF0_MOUSE,Q80TR0_MOUSE,NFAT5_MOUSE	Nuclear factor of-activated T-cells 5,Nuclear factor of-activated T-cells 5,Nuclear factor of-activated T-cells 5,Nuclear factor of-activated T-cells 5,MKIAA0827 protein Nuclear factor of-activated T-cells 5,Nuclear factor of activated T-cells 5	Nfat5,Nfat5,Nfat5,Nfat5,Nfat5 mKIAA0827,Nfat5	ENSMUST00000154474,ENSMUST00000133026,ENSMUST00000126333,ENSMUST00000144100,ENSMUST00000147588,ENSMUST00000075922 ENSMUST00000077440 ENSMUST00000125721 ENSMUST00000151114 ENSMUST00000169453	ENSMUSP00000115036,ENSMUSP00000116631,ENSMUSP00000118130,ENSMUSP00000117554,ENSMUSP00000122871,ENSMUSP00000075311	ENSMUSG00000003847,ENSMUSG00000003847,ENSMUSG00000003847,ENSMUSG00000003847,ENSMUSG00000003847,ENSMUSG00000003847	11296.5	12230.5	10362.5	-0.23909	0.000328334	0.0163926
ENSMUSG00000007850	chr11	50376990	50386528	+	Hnrnph1	protein_coding	O35737,Q8C2Q7	HNRH1_MOUSE,Q8C2Q7_MOUSE	Heterogeneous nuclear ribonucleoprotein H,Heterogeneous nuclear ribonucleoprotein H	Hnrnph1 Hnrph Hnrph1,Hnrnph1 Hnrph1	ENSMUST00000069304 ENSMUST00000109142,ENSMUST00000077817	ENSMUSP00000070503,ENSMUSP00000076989	ENSMUSG00000007850,ENSMUSG00000007850	30074.4	32567.1	27581.8	-0.239691	0.000125155	0.00826376
ENSMUSG00000037475	chrX	41794991	41920674	-	Thoc2	protein_coding	B1AZI6,B1AZI7,B8A4C2,F6QCT0,F6RBN0,F6SBF2,F6VK25,F6W2C7,Q8C690	THOC2_MOUSE,B1AZI7_MOUSE,B8A4C2_MOUSE,F6QCT0_MOUSE,F6RBN0_MOUSE,F6SBF2_MOUSE,F6VK25_MOUSE,F6W2C7_MOUSE,Q8C690_MOUSE	THO complex subunit 2,THO complex subunit 2,THO complex subunit 2,THO complex subunit 2,THO complex subunit 2,THO complex subunit 2,THO complex subunit 2,THO complex subunit 2,THO complex subunit 2	Thoc2,Thoc2,Thoc2,Thoc2,Thoc2,Thoc2,Thoc2,Thoc2,Thoc2	ENSMUST00000047037,ENSMUST00000152921,ENSMUST00000155369,ENSMUST00000131259,ENSMUST00000129915,ENSMUST00000151430,ENSMUST00000143557,ENSMUST00000145586,ENSMUST00000124458	ENSMUSP00000044677,ENSMUSP00000114148,ENSMUSP00000120342,ENSMUSP00000119823,ENSMUSP00000121941,ENSMUSP00000115815,ENSMUSP00000118106,ENSMUSP00000118960,ENSMUSP00000119460	ENSMUSG00000037475,ENSMUSG00000037475,ENSMUSG00000037475,ENSMUSG00000037475,ENSMUSG00000037475,ENSMUSG00000037475,ENSMUSG00000037475,ENSMUSG00000037475,ENSMUSG00000037475	6437.78	6976.37	5899.18	-0.241924	0.0014775	0.0480034
ENSMUSG00000027550	chr3	14533788	14572658	+	Lrrcc1	protein_coding	B9EI20,E9PVL4,E9Q8Q7,E9QNC6,F6QGT9,F7ABL5,F7ANC5,G5E8Y2	B9EI20_MOUSE,E9PVL4_MOUSE,E9Q8Q7_MOUSE,E9QNC6_MOUSE,F6QGT9_MOUSE,F7ABL5_MOUSE,F7ANC5_MOUSE,G5E8Y2_MOUSE	Leucine rich repeat and coiled-coil domain containing 1 Leucine-rich repeat and coiled-coil domain-containing protein 1,Leucine-rich repeat and coiled-coil domain-containing protein 1,Leucine-rich repeat and coiled-coil domain-containing protein 1,Leucine-rich repeat and coiled-coil domain-containing protein 1,Leucine-rich repeat and coiled-coil domain-containing protein 1,Leucine-rich repeat and…	Lrrcc1,Lrrcc1,Lrrcc1,Lrrcc1,Lrrcc1,Lrrcc1,Lrrcc1,Lrrcc1 mCG_20039	ENSMUST00000108370,ENSMUST00000165436,ENSMUST00000163660,ENSMUST00000091325,ENSMUST00000171620,ENSMUST00000169799,ENSMUST00000167858,ENSMUST00000169079	ENSMUSP00000104007,ENSMUSP00000129430,ENSMUSP00000128733,ENSMUSP00000088875,ENSMUSP00000128252,ENSMUSP00000126592,ENSMUSP00000129368,ENSMUSP00000126560	ENSMUSG00000027550,ENSMUSG00000027550,ENSMUSG00000027550,ENSMUSG00000027550,ENSMUSG00000027550,ENSMUSG00000027550,ENSMUSG00000027550,ENSMUSG00000027550	2308.08	2506.93	2109.23	-0.249096	0.00125739	0.0431037
ENSMUSG00000000031	chr7	142575529	142578143	-	H19	lincRNA								78698.1	85528.7	71867.5	-0.251065	7.24237e-06	0.00097316
ENSMUSG00000055531	chr10	117344673	117380015	-	Cpsf6	protein_coding	H3BJ30,H3BJW3,H3BKW0,H3BLM1,H3BLM9,Q6NVF9 Q8BX86 Q8BXI8	H3BJ30_MOUSE,H3BJW3_MOUSE,H3BKW0_MOUSE,H3BLM1_MOUSE,H3BLM9_MOUSE,CPSF6_MOUSE	Cleavage and polyadenylation-specificity factor subunit 6,Cleavage and polyadenylation-specificity factor subunit 6,Cleavage and polyadenylation-specificity factor subunit 6,Cleavage and polyadenylation-specificity factor subunit 6,Cleavage and polyadenylation-specificity factor subunit 6,Cleavage and polyadenylation specificity factor subunit 6	Cpsf6,Cpsf6,Cpsf6,Cpsf6,Cpsf6,Cpsf6	ENSMUST00000176686,ENSMUST00000176670,ENSMUST00000176480,ENSMUST00000175888,ENSMUST00000175924,ENSMUST00000069168 ENSMUST00000177145	ENSMUSP00000134823,ENSMUSP00000135150,ENSMUSP00000135550,ENSMUSP00000135840,ENSMUSP00000135848,ENSMUSP00000068408	ENSMUSG00000055531,ENSMUSG00000055531,ENSMUSG00000055531,ENSMUSG00000055531,ENSMUSG00000055531,ENSMUSG00000055531	10530.1	11450.4	9609.9	-0.25278	7.32642e-05	0.00577832
ENSMUSG00000035293	chr12	51348061	51376986	+	G2e3	protein_coding	E9Q7C2,E9Q7E5,Q5RJY2 E9QK24 Q6ZPT7 Q8BNA4	E9Q7C2_MOUSE,E9Q7E5_MOUSE,G2E3_MOUSE	G2/M phase-specific E3 ubiquitin-protein ligase,G2/M phase-specific E3 ubiquitin-protein ligase,G2/M phase-specific E3 ubiquitin-protein ligase	G2e3,G2e3,G2e3 Kiaa1333	ENSMUST00000119211,ENSMUST00000121521,ENSMUST00000054308	ENSMUSP00000113270,ENSMUSP00000113191,ENSMUSP00000054474	ENSMUSG00000035293,ENSMUSG00000035293,ENSMUSG00000035293	4044.5	4398.61	3690.39	-0.253211	0.000847618	0.0332506
ENSMUSG00000026605	chr1	189640606	189688086	-	Cenpf	protein_coding	E9PY14,E9Q3P4,E9Q776,F6V6F0	E9PY14_MOUSE,E9Q3P4_MOUSE,E9Q776_MOUSE,F6V6F0_MOUSE	Protein Cenpf,Protein Cenpf,Protein Cenpf,Protein Cenpf	Cenpf,Cenpf,Cenpf,Cenpf	ENSMUST00000165962,ENSMUST00000171929,ENSMUST00000165663,ENSMUST00000165798	ENSMUSP00000132759,ENSMUSP00000129738,ENSMUSP00000130308,ENSMUSP00000132430	ENSMUSG00000026605,ENSMUSG00000026605,ENSMUSG00000026605,ENSMUSG00000026605	4894.8	5324.14	4465.46	-0.253687	0.000394108	0.0190643
ENSMUSG00000031229	chrX	105797615	105929403	-	Atrx	protein_coding	A6PWK7,A6PWK8,A6PWK9,A6PWL2,F6RDB7,Q3TA30,Q3UY26,Q61687 A2ADH4,Q8C2S3	A6PWK7_MOUSE,A6PWK8_MOUSE,A6PWK9_MOUSE,A6PWL2_MOUSE,F6RDB7_MOUSE,Q3TA30_MOUSE,Q3UY26_MOUSE,ATRX_MOUSE,Q8C2S3_MOUSE	Transcriptional regulator ATRX,Transcriptional regulator ATRX,Transcriptional regulator ATRX,Transcriptional regulator ATRX,Transcriptional regulator ATRX,Transcriptional regulator ATRX,Transcriptional regulator ATRX,Transcriptional regulator ATRX,Transcriptional regulator ATRX	Atrx,Atrx,Atrx,Atrx,Atrx,Atrx,Atrx,Atrx Hp1bp2 Xnp,Atrx	ENSMUST00000154866,ENSMUST00000134381,ENSMUST00000137453,ENSMUST00000130980,ENSMUST00000128968,ENSMUST00000101305,ENSMUST00000134507,ENSMUST00000113573,ENSMUST00000150914	ENSMUSP00000121291,ENSMUSP00000122875,ENSMUSP00000120246,ENSMUSP00000117528,ENSMUSP00000121416,ENSMUSP00000098863,ENSMUSP00000123085,ENSMUSP00000109203,ENSMUSP00000122034	ENSMUSG00000031229,ENSMUSG00000031229,ENSMUSG00000031229,ENSMUSG00000031229,ENSMUSG00000031229,ENSMUSG00000031229,ENSMUSG00000031229,ENSMUSG00000031229,ENSMUSG00000031229	15391.9	16751.2	14032.5	-0.255471	0.000215183	0.0122095
ENSMUSG00000032254	chr9	61917280	61946799	-	Kif23	protein_coding	E9Q5G3 Q80V30 Q99PT8	KIF23_MOUSE	Kinesin-like protein KIF23	Kif23	ENSMUST00000034815	ENSMUSP00000034815	ENSMUSG00000032254	2881.94	3138.38	2625.49	-0.257343	0.00133744	0.044928
ENSMUSG00000020154	chr10	116301374	116389538	+	Ptprb	protein_coding	B2RU80 Q3UGZ7 Q8CIW2	PTPRB_MOUSE	Receptor-type tyrosine-protein phosphatase beta	Ptprb	ENSMUST00000092167	ENSMUSP00000089805	ENSMUSG00000020154	5648.76	6157.68	5139.84	-0.260619	4.32997e-05	0.0038315
ENSMUSG00000071337	chr6	86404219	86433403	+	Tia1	protein_coding	D3YY02,D3Z4H6,G5E8L2,P52912,Q80ZW7,Q8CII5	D3YY02_MOUSE,D3Z4H6_MOUSE,G5E8L2_MOUSE,TIA1_MOUSE,Q80ZW7_MOUSE,Q8CII5_MOUSE	Nucleolysin TIA-1,Nucleolysin TIA-1,Cytotoxic granule-associated RNA binding protein 1, isoform CRA_f Nucleolysin TIA-1,Nucleolysin TIA-1,Nucleolysin TIA-1 Tia1 protein,Nucleolysin TIA-1 Tia1 protein	Tia1,Tia1,Tia1 mCG_130509,Tia1 Tia,Tia1,Tia1	ENSMUST00000113708 ENSMUST00000113712,ENSMUST00000095754,ENSMUST00000095752,ENSMUST00000095753,ENSMUST00000113713,ENSMUST00000130967	ENSMUSP00000109338,ENSMUSP00000093426,ENSMUSP00000093424,ENSMUSP00000093425,ENSMUSP00000109342,ENSMUSP00000118558	ENSMUSG00000071337,ENSMUSG00000071337,ENSMUSG00000071337,ENSMUSG00000071337,ENSMUSG00000071337,ENSMUSG00000071337	8757.23	9553.46	7961	-0.263044	9.331e-05	0.00677057
ENSMUSG00000029177	chr5	30666777	30674830	+	Cenpa	protein_coding	D6RCV6,D6RJ71,O35216 Q545C9	D6RCV6_MOUSE,D6RJ71_MOUSE,CENPA_MOUSE	Centromere protein A, isoform CRA_c Histone H3-like centromeric protein A,Centromere protein A, isoform CRA_a Histone H3-like centromeric protein A,Histone H3-like centromeric protein A	Cenpa mCG_23505,Cenpa mCG_23505,Cenpa	ENSMUST00000133316,ENSMUST00000031073 ENSMUST00000134846,ENSMUST00000144742	ENSMUSP00000123493,ENSMUSP00000031073,ENSMUSP00000122831	ENSMUSG00000029177,ENSMUSG00000029177,ENSMUSG00000029177	3545.31	3869.03	3221.59	-0.264127	0.000227883	0.0126864
ENSMUSG00000059142	chr17	22846697	22867134	-	Zfp945	protein_coding	E9PYM8,Q66L36,Q8BNS8	E9PYM8_MOUSE,Q66L36_MOUSE,Q8BNS8_MOUSE	Protein Zfp945,A630033E08Rik protein Protein Zfp945,Protein Zfp945	Zfp945,Zfp945 A630033E08Rik,Zfp945	ENSMUST00000160457,ENSMUST00000088696,ENSMUST00000150092	ENSMUSP00000124123,ENSMUSP00000086074,ENSMUSP00000117978	ENSMUSG00000059142,ENSMUSG00000059142,ENSMUSG00000059142	2601.57	2840.79	2362.35	-0.265969	0.000326647	0.0163926
ENSMUSG00000028312	chr4	52439243	52488260	+	Smc2	protein_coding	B1AWH6,Q8CG48 Q52KE9 Q61076 Q9CS17 Q9CSD8	B1AWH6_MOUSE,SMC2_MOUSE	Structural maintenance of chromosomes protein 2,Structural maintenance of chromosomes protein 2	Smc2,Smc2 Cape Fin16 Smc2l1	ENSMUST00000142227,ENSMUST00000102915 ENSMUST00000117280	ENSMUSP00000114228,ENSMUSP00000099979	ENSMUSG00000028312,ENSMUSG00000028312	4264.47	4663.32	3865.62	-0.270594	0.000174109	0.0105204
ENSMUSG00000039967	chr4	34803113	34882960	-	Zfp292	protein_coding	Q9Z2U2 B1B0E1 B1B0E2 Q8BQX3 Q8BS87 Q8CGI6 Q922D3	ZN292_MOUSE	Zinc finger protein 292	Zfp292 Zfp15	ENSMUST00000047950 ENSMUST00000098163	ENSMUSP00000037233	ENSMUSG00000039967	4396.02	4809.35	3982.68	-0.272039	0.000133007	0.00866858
ENSMUSG00000063108	chr9	20432972	20460162	-	Zfp26	protein_coding	E0CYR0,G3XA08	E0CYR0_MOUSE,G3XA08_MOUSE	Zinc finger protein 26,MCG67939, isoform CRA_b Zinc finger protein 26	Zfp26,Zfp26 mCG_67939	ENSMUST00000162438,ENSMUST00000159569	ENSMUSP00000123960,ENSMUSP00000124075	ENSMUSG00000063108,ENSMUSG00000063108	2124.32	2325.8	1922.84	-0.274357	0.00137756	0.0460251
ENSMUSG00000002265	chr7	6703892	6730421	-	Peg3	protein_coding	D6RGA4,Q3URU2 O54978 Q3TQ69 Q5EBP7 Q61138 Q6GQS0 Q80U47 Q8R5N0 Q9QX53	D6RGA4_MOUSE,PEG3_MOUSE	Paternally-expressed gene 3 protein,Paternally-expressed gene 3 protein	Peg3,Peg3 Kiaa0287 Pw1	ENSMUST00000143703 ENSMUST00000150182,ENSMUST00000051209	ENSMUSP00000122423,ENSMUSP00000050750	ENSMUSG00000002265,ENSMUSG00000002265	12290.8	13470.8	11110.7	-0.277862	1.21725e-05	0.00144006
ENSMUSG00000036202	chr2	52072837	52122383	+	Rif1	protein_coding	Q6PR54 Q6T8D9 Q7TPD8 Q8BTU2 Q8C408 Q9CS77	RIF1_MOUSE	Telomere-associated protein RIF1	Rif1	ENSMUST00000069794 ENSMUST00000112693	ENSMUSP00000064155	ENSMUSG00000036202	4284.02	4695.55	3872.49	-0.277965	0.000822268	0.0330132
ENSMUSG00000033904	chr7	118712552	118737024	+	Ccp110	protein_coding	Q7TSH4 Q6A072	CP110_MOUSE	Centriolar coiled-coil protein of 110 kDa	Ccp110 Cep110 Cp110 Kiaa0419	ENSMUST00000038650 ENSMUST00000106557	ENSMUSP00000038881	ENSMUSG00000033904	3478.3	3817.02	3139.58	-0.281791	0.000828059	0.0330132
ENSMUSG00000001517	chr6	128362967	128375893	+	Foxm1	protein_coding	E9Q7Y0,Q6P1H7	E9Q7Y0_MOUSE,Q6P1H7_MOUSE	Forkhead box protein M1,Forkhead box M1 Forkhead box protein M1	Foxm1,Foxm1 mCG_132524	ENSMUST00000112148,ENSMUST00000073316	ENSMUSP00000107776,ENSMUSP00000073041	ENSMUSG00000001517,ENSMUSG00000001517	2296.24	2520.79	2071.69	-0.28294	0.000933158	0.0352041
ENSMUSG00000040204	chr9	65890237	65903266	+	2810417H13Rik	protein_coding	Q9CQX4 Q4VAG2 Q9CZ17 Q9D0A5	PAF15_MOUSE	PCNA-associated factor	Paf Ns5atp9	ENSMUST00000045802	ENSMUSP00000038877	ENSMUSG00000040204	2888.96	3171.93	2605.99	-0.283431	0.000630894	0.0273572
ENSMUSG00000028034	chr3	152210422	152236826	+	Fubp1	protein_coding	Q3TUE1	Q3TUE1_MOUSE	Far upstream element-binding protein 1	Fubp1	ENSMUST00000106121 ENSMUST00000166984	ENSMUSP00000101727	ENSMUSG00000028034	15276.3	16775.4	13777.3	-0.284036	0.000179489	0.0107161
ENSMUSG00000027306	chr2	119618298	119651244	+	Nusap1	protein_coding	Q9ERH4 Q8C2L8 Q8C989 Q921Z0	NUSAP_MOUSE	Nucleolar and spindle-associated protein 1	Nusap1	ENSMUST00000028771 ENSMUST00000068225	ENSMUSP00000028771	ENSMUSG00000027306	3340.66	3674.31	3007.01	-0.289056	6.35477e-05	0.00516159
ENSMUSG00000028369	chr4	58042442	58206859	-	Svep1	protein_coding	A2AVA0 Q8C720 Q8CBT2 Q922H0 Q9CUT3 Q9ES77	SVEP1_MOUSE	Sushi, von Willebrand factor type A, EGF and pentraxin domain-containing protein 1	Svep1	ENSMUST00000042850	ENSMUSP00000045856	ENSMUSG00000028369	3449.15	3793.76	3104.55	-0.28916	0.000163685	0.0100087
ENSMUSG00000078247	chr17	12741311	12860122	+	Airn	antisense								1925.22	2117.85	1732.59	-0.28952	0.00122238	0.0426422
ENSMUSG00000064061	chr16	48924232	48994165	-	Dzip3	protein_coding	E9QNZ2,F6Z1P8,Q7TPV2 Q148V3 Q80TU4 Q8BYK7	E9QNZ2_MOUSE,F6Z1P8_MOUSE,DZIP3_MOUSE	E3 ubiquitin-protein ligase DZIP3,E3 ubiquitin-protein ligase DZIP3,E3 ubiquitin-protein ligase DZIP3	Dzip3,Dzip3,Dzip3 Kiaa0675	ENSMUST00000121869,ENSMUST00000151950,ENSMUST00000114516	ENSMUSP00000113344,ENSMUSP00000117675,ENSMUSP00000110161	ENSMUSG00000064061,ENSMUSG00000064061,ENSMUSG00000064061	3107.19	3419.61	2794.78	-0.291003	0.000942808	0.0352972
ENSMUSG00000039167	chr3	151437887	151545086	+	Adgrl4	protein_coding	Q923X1 E9QLT4 Q91W44	ELTD1_MOUSE	EGF, latrophilin seven transmembrane domain-containing protein 1	Eltd1	ENSMUST00000046977	ENSMUSP00000041939	ENSMUSG00000039167	1255.39	1382.27	1128.51	-0.292388	0.00154408	0.0492836
ENSMUSG00000022360	chr15	58094047	58135082	-	Atad2	protein_coding	G3X963	G3X963_MOUSE	ATPase family AAA domain-containing protein 2 MCG7707	Atad2 mCG_7707	ENSMUST00000038194	ENSMUSP00000043691	ENSMUSG00000022360	3699.59	4074.79	3324.4	-0.293554	0.000151331	0.00956823
ENSMUSG00000025001	chr19	38930915	38971051	+	Hells	protein_coding	D3Z414,Q60848 Q497T3 Q8VDZ1 Q9CYV7	D3Z414_MOUSE,HELLS_MOUSE	Lymphocyte-specific helicase,Lymphocyte-specific helicase	Hells,Hells Lsh Pasg	ENSMUST00000145051,ENSMUST00000025965	ENSMUSP00000116710,ENSMUSP00000025965	ENSMUSG00000025001,ENSMUSG00000025001	2061.56	2273.04	1850.09	-0.296885	0.000491678	0.0229675
ENSMUSG00000080316	chr17	17830719	17843009	+	Spaca6	protein_coding	D3Z1S3,E9Q8Q8,F7ANW7,J3QMI7	D3Z1S3_MOUSE,E9Q8Q8_MOUSE,F7ANW7_MOUSE,J3QMI7_MOUSE	Protein Ncrna00085,Protein Ncrna00085,Protein Ncrna00085,Protein Ncrna00085	Spaca6 4930546H06Rik Ncrna00085,Spaca6 4930546H06Rik Ncrna00085,Spaca6 4930546H06Rik Ncrna00085,Spaca6 4930546H06Rik Ncrna00085	ENSMUST00000139969,ENSMUST00000172097,ENSMUST00000154301,ENSMUST00000150302	ENSMUSP00000119658,ENSMUSP00000128732,ENSMUSP00000117377,ENSMUSP00000136307	ENSMUSG00000080316,ENSMUSG00000080316,ENSMUSG00000080316,ENSMUSG00000080316	3079.29	3395.78	2762.8	-0.297515	0.00092766	0.0352041
ENSMUSG00000033952	chr1	139454772	139494091	+	Aspm	protein_coding	B1ARM8,Q8CJ27 B1ARM7 O88482 Q8BJI8 Q8BKT4	B1ARM8_MOUSE,ASPM_MOUSE	Abnormal spindle-like microcephaly-associated protein homolog,Abnormal spindle-like microcephaly-associated protein homolog	Aspm,Aspm Calmbp1 Sha1	ENSMUST00000097554,ENSMUST00000053364	ENSMUSP00000095162,ENSMUSP00000059159	ENSMUSG00000033952,ENSMUSG00000033952	2818.78	3108.73	2528.83	-0.29775	0.000105218	0.00729423
ENSMUSG00000032740	chr11	29373658	29510808	+	Ccdc88a	protein_coding	F6R1B7,Q5SNZ0 Q5M6X2 Q5M6X4 Q5M6X5 Q5SNZ1 Q8C486 Q8CFU7	F6R1B7_MOUSE,GRDN_MOUSE	Girdin,Girdin	Ccdc88a,Ccdc88a Grdn Kiaa1212	ENSMUST00000123561,ENSMUST00000040182	ENSMUSP00000119173,ENSMUSP00000048978	ENSMUSG00000032740,ENSMUSG00000032740	2866.92	3164	2569.84	-0.29997	0.000181639	0.0107443
ENSMUSG00000012443	chr19	37376403	37421859	+	Kif11	protein_coding	Q6P9P6 Q9Z1J0	KIF11_MOUSE	Kinesin-like protein KIF11	Kif11	ENSMUST00000012587	ENSMUSP00000012587	ENSMUSG00000012443	4958.62	5473.71	4443.53	-0.300752	1.66797e-05	0.00187157
ENSMUSG00000048922	chr14	67676331	67715841	-	Cdca2	protein_coding	D3YZE8,D3Z5P7,F6RTJ7,F6VP65,Q14B71 Q8BSQ1 Q8CD75	D3YZE8_MOUSE,D3Z5P7_MOUSE,F6RTJ7_MOUSE,F6VP65_MOUSE,CDCA2_MOUSE	Cell division cycle-associated protein 2,Cell division cycle-associated protein 2,Cell division cycle-associated protein 2,Cell division cycle-associated protein 2,Cell division cycle-associated protein 2	Cdca2,Cdca2,Cdca2,Cdca2,Cdca2	ENSMUST00000132705,ENSMUST00000124045,ENSMUST00000130922,ENSMUST00000131179,ENSMUST00000150006 ENSMUST00000163100	ENSMUSP00000115633,ENSMUSP00000116384,ENSMUSP00000119525,ENSMUSP00000123664,ENSMUSP00000117847	ENSMUSG00000048922,ENSMUSG00000048922,ENSMUSG00000048922,ENSMUSG00000048922,ENSMUSG00000048922	1507.29	1664.05	1350.54	-0.300957	0.00124692	0.0429477
ENSMUSG00000031004	chr7	135689788	135716379	-	Mki67	protein_coding	E9PVX6	E9PVX6_MOUSE	Protein Mki67	Mki67	ENSMUST00000033310	ENSMUSP00000033310	ENSMUSG00000031004	15213.7	16815.9	13611.5	-0.304985	2.14673e-05	0.00220425
ENSMUSG00000036768	chr9	122951081	123018725	+	Kif15	protein_coding	Q6P9L6 O35065 Q70MX5	KIF15_MOUSE	Kinesin-like protein KIF15	Kif15 Klp2 Knsl7	ENSMUST00000040717	ENSMUSP00000035490	ENSMUSG00000036768	2567.05	2839.43	2294.67	-0.307194	0.000274682	0.0146551
ENSMUSG00000028134	chr3	119718742	119784466	-	Ptbp2	protein_coding	Q91Z31 Q7TNW7 Q9CUW2 Q9QYC2 Q9R0V9	PTBP2_MOUSE	Polypyrimidine tract-binding protein 2	Ptbp2 Brptb Nptb	ENSMUST00000029780	ENSMUSP00000029780	ENSMUSG00000028134	3392.99	3753.34	3032.63	-0.307513	7.08302e-06	0.00097316
ENSMUSG00000028718	chr4	115000159	115043196	+	Stil	protein_coding	A2AD39,D6RH61,F6VXM5,F6WX10	A2AD39_MOUSE,D6RH61_MOUSE,F6VXM5_MOUSE,F6WX10_MOUSE	SCL-interrupting locus protein homolog,SCL-interrupting locus protein homolog,SCL-interrupting locus protein homolog,SCL-interrupting locus protein homolog	Stil,Stil,Stil,Stil	ENSMUST00000030490,ENSMUST00000141933,ENSMUST00000147519,ENSMUST00000129957	ENSMUSP00000030490,ENSMUSP00000118849,ENSMUSP00000120836,ENSMUSP00000123385	ENSMUSG00000028718,ENSMUSG00000028718,ENSMUSG00000028718,ENSMUSG00000028718	1640.72	1816.72	1464.72	-0.310523	0.000831536	0.0330308
ENSMUSG00000029283	chr5	106964322	106984432	+	Cdc7	protein_coding	G3UVV7,Q66JY4,Q9Z0H0 Q9WUV1 Q9Z2Y7	G3UVV7_MOUSE,Q66JY4_MOUSE,CDC7_MOUSE	Cell division cycle 7 (S, cerevisiae), isoform CRA_a Cell division cycle 7-related protein kinase,Cdc7 protein Cell division cycle 7-related protein kinase,Cell division cycle 7-related protein kinase	Cdc7 mCG_19140,Cdc7,Cdc7 Cdc7l1	ENSMUST00000129938,ENSMUST00000076467,ENSMUST00000031221 ENSMUST00000117196 ENSMUST00000118261	ENSMUSP00000119612,ENSMUSP00000075792,ENSMUSP00000031221	ENSMUSG00000029283,ENSMUSG00000029283,ENSMUSG00000029283	1910.73	2115.83	1705.63	-0.310759	0.000804444	0.0329157
ENSMUSG00000058290	chr15	102296293	102324356	+	Espl1	protein_coding	P60330 A6H6E3	ESPL1_MOUSE	Separin	Espl1 Esp1 Kiaa0165	ENSMUST00000064924	ENSMUSP00000064465	ENSMUSG00000058290	1493.07	1653.84	1332.3	-0.311683	0.000963592	0.0357943
ENSMUSG00000027379	chr2	127801122	127831865	-	Bub1	protein_coding	A2APR8	A2APR8_MOUSE	Mitotic checkpoint serine/threonine-protein kinase BUB1	Bub1	ENSMUST00000028858	ENSMUSP00000028858	ENSMUSG00000027379	2225	2467.68	1982.33	-0.315812	0.000174954	0.0105204
ENSMUSG00000084911	chr9	97085326	97088610	+	Gm16185	antisense								1776.43	1975.74	1577.13	-0.324911	0.00117935	0.0416755
ENSMUSG00000019817	chr10	13060504	13131694	+	Plagl1	protein_coding	B0QZX4,B0QZX5,Q3UQW2,Q9JLQ4	B0QZX4_MOUSE,B0QZX5_MOUSE,Q3UQW2_MOUSE,Q9JLQ4_MOUSE	Protein Plagl1,Protein Plagl1,Pleiomorphic adenoma gene-like 1, isoform CRA_c Protein Plagl1,Pleiomorphic adenoma gene-like 1, isoform CRA_d Protein Plagl1 Zinc finger protein ZAC1	Plagl1,Plagl1,Plagl1 mCG_12864,Plagl1 Zac1 mCG_12864	ENSMUST00000130313,ENSMUST00000145103,ENSMUST00000121325 ENSMUST00000121766,ENSMUST00000121646	ENSMUSP00000117321,ENSMUSP00000120581,ENSMUSP00000112889,ENSMUSP00000112847	ENSMUSG00000019817,ENSMUSG00000019817,ENSMUSG00000019817,ENSMUSG00000019817	12834.6	14286.5	11382.8	-0.327774	1.31952e-06	0.000293095
ENSMUSG00000041147	chr5	150522630	150570329	+	Brca2	protein_coding	P97929 F8VPU5 O35922 P97383	BRCA2_MOUSE	Breast cancer type 2 susceptibility protein homolog	Brca2 Fancd1	ENSMUST00000044620	ENSMUSP00000038576	ENSMUSG00000041147	1184.54	1319.61	1049.46	-0.330175	0.00132243	0.0445613
ENSMUSG00000015880	chr5	45669919	45700546	+	Ncapg	protein_coding	E9PWG6	E9PWG6_MOUSE	Protein Ncapg	Ncapg	ENSMUST00000117396	ENSMUSP00000112871	ENSMUSG00000015880	2107.53	2350.41	1864.66	-0.333844	4.82653e-05	0.00423645
ENSMUSG00000033031	chr16	48994185	49019709	+	C330027C09Rik	protein_coding	D3Z7B5,D6RGL3,Q8BWY9 B2RQ25 Q69ZH6 Q7TPZ7	D3Z7B5_MOUSE,D6RGL3_MOUSE,CIP2A_MOUSE	Protein C330027C09Rik,Protein C330027C09Rik,Protein CIP2A	C330027C09Rik,C330027C09Rik,Kiaa1524 Cip2a	ENSMUST00000117994,ENSMUST00000125278,ENSMUST00000048374	ENSMUSP00000113075,ENSMUSP00000115529,ENSMUSP00000044714	ENSMUSG00000033031,ENSMUSG00000033031,ENSMUSG00000033031	2843.32	3172.25	2514.4	-0.335174	3.62083e-05	0.00333976
ENSMUSG00000024056	chr17	71496100	71526857	-	Ndc80	protein_coding	Q9D0F1 Q3TQT6 Q3UWM5 Q99P70	NDC80_MOUSE	Kinetochore protein NDC80 homolog	Ndc80 Hec1 Kntc2	ENSMUST00000024851	ENSMUSP00000024851	ENSMUSG00000024056	1030.38	1153.46	907.294	-0.345985	0.00100466	0.0369417
ENSMUSG00000015882	chr5	45697181	45857615	-	Lcorl	protein_coding	E9PXY2,Q3U285 B2RRS7 Q6NZG1 Q8BNH5 Q8BRN7 Q8BRT8 Q8C9J6 Q8CJG4	E9PXY2_MOUSE,LCORL_MOUSE	Ligand-dependent nuclear receptor corepressor-like protein,Ligand-dependent nuclear receptor corepressor-like protein	Lcorl,Lcorl Mlr1	ENSMUST00000121573,ENSMUST00000016026 ENSMUST00000045586 ENSMUST00000067997 ENSMUST00000087164	ENSMUSP00000112416,ENSMUSP00000016026	ENSMUSG00000015882,ENSMUSG00000015882	2706.63	3034.43	2378.84	-0.351041	5.02603e-06	0.000781476
ENSMUSG00000051278	chr3	127553489	127618023	+	Zgrf1	protein_coding	Q0VGT4 E9Q2K6	CD021_MOUSE	Uncharacterized protein C4orf21 homolog		ENSMUST00000043108	ENSMUSP00000044432	ENSMUSG00000051278	913.398	1024.98	801.819	-0.353851	0.0011276	0.0405044
ENSMUSG00000024795	chr19	34922358	34975731	+	Kif20b	protein_coding	Q80WE4 E9QPW5 Q3V347 Q80VC0 Q8BLI2 Q99PT5	KI20B_MOUSE	Kinesin-like protein KIF20B	Kif20b Mphosph1	ENSMUST00000087341	ENSMUSP00000084599	ENSMUSG00000024795	2362.95	2652.02	2073.87	-0.354616	4.02899e-05	0.0036241
ENSMUSG00000025597	chrX	114474333	114560829	+	Klhl4	protein_coding	B1AZQ9,B1AZR0,Q8BLJ6,Q8BUX1	B1AZQ9_MOUSE,B1AZR0_MOUSE,Q8BLJ6_MOUSE,Q8BUX1_MOUSE	Protein Klhl4,Kelch-like 4 (Drosophila), isoform CRA_a Protein Klhl4,Kelch-like 4 (Drosophila), isoform CRA_c Protein Klhl4,Protein Klhl4	Klhl4,Klhl4 mCG_113434,Klhl4 mCG_113434,Klhl4	ENSMUST00000113371,ENSMUST00000040504,ENSMUST00000133447,ENSMUST00000113370	ENSMUSP00000108998,ENSMUSP00000038080,ENSMUSP00000118072,ENSMUSP00000108997	ENSMUSG00000025597,ENSMUSG00000025597,ENSMUSG00000025597,ENSMUSG00000025597	1064.41	1194.93	933.884	-0.355277	0.000445884	0.0211922
ENSMUSG00000097589	chr14	61602839	61682373	-	Dleu2	processed_transcript								1860.17	2089.98	1630.36	-0.358102	8.88054e-05	0.00662026
ENSMUSG00000035236	chr2	39066214	39190730	-	Scai	protein_coding	B0R0E3,D6RHQ0,Q8C8N2 A2RTF5 A3KGQ2 Q8C409 Q8C8K2	B0R0E3_MOUSE,D6RHQ0_MOUSE,SCAI_MOUSE	Protein SCAI,Protein SCAI,Protein SCAI	Scai,Scai,Scai	ENSMUST00000142872,ENSMUST00000147433,ENSMUST00000038874	ENSMUSP00000118536,ENSMUSP00000116359,ENSMUSP00000037194	ENSMUSG00000035236,ENSMUSG00000035236,ENSMUSG00000035236	3609.19	4085.81	3132.57	-0.383171	1.46428e-06	0.000306486
ENSMUSG00000042104	chr14	118985039	119099430	-	Uggt2	protein_coding	E9Q4X2,F6X3X7,F6YNY8,G3UXP5	E9Q4X2_MOUSE,F6X3X7_MOUSE,F6YNY8_MOUSE,G3UXP5_MOUSE	Protein Uggt2,Protein Uggt2,Protein Uggt2,Protein Uggt2	Uggt2,Uggt2,Uggt2,Uggt2	ENSMUST00000156203,ENSMUST00000153693,ENSMUST00000127153,ENSMUST00000173391	ENSMUSP00000121249,ENSMUSP00000123327,ENSMUSP00000117738,ENSMUSP00000133772	ENSMUSG00000042104,ENSMUSG00000042104,ENSMUSG00000042104,ENSMUSG00000042104	1939.13	2199.76	1678.5	-0.389974	0.000115274	0.00784149
ENSMUSG00000040254	chr5	12383385	12588948	+	Sema3d	protein_coding	Q8BH34	SEM3D_MOUSE	Semaphorin-3D	Sema3d	ENSMUST00000030868	ENSMUSP00000030868	ENSMUSG00000040254	774.535	879.15	669.92	-0.391609	0.000834966	0.0330465
ENSMUSG00000101609	chr7	143212155	143296549	-	Kcnq1ot1	antisense								2261.8	2584.47	1939.12	-0.414278	2.84226e-05	0.00273763
ENSMUSG00000039396	chr8	53586867	53639065	-	Neil3	protein_coding	D3YXA4,D3Z1T7,D3Z756,Q8K203 Q4ADY6 Q8CD85 Q8R3P4	D3YXA4_MOUSE,D3Z1T7_MOUSE,D3Z756_MOUSE,NEIL3_MOUSE	Endonuclease 8-like 3,Endonuclease 8-like 3,Endonuclease 8-like 3,Endonuclease 8-like 3	Neil3,Neil3,Neil3,Neil3	ENSMUST00000126157,ENSMUST00000135443,ENSMUST00000153267,ENSMUST00000047768	ENSMUSP00000115066,ENSMUSP00000121938,ENSMUSP00000122287,ENSMUSP00000041909	ENSMUSG00000039396,ENSMUSG00000039396,ENSMUSG00000039396,ENSMUSG00000039396	1446.73	1653.48	1239.99	-0.414888	5.83481e-06	0.000846748
ENSMUSG00000100826	chr7	59307924	59975759	-	Snhg14	processed_transcript								603.179	690.905	515.454	-0.421933	0.00142006	0.0468365
ENSMUSG00000102602	chr4	131878628	131883237	+	A930004J17Rik	TEC								846.905	971.03	722.78	-0.425449	0.000761741	0.0317655
ENSMUSG00000044783	chr1	88262471	88277633	-	Hjurp	protein_coding	D6RI36,E9Q4T0,E9QKG8,F6XR06	D6RI36_MOUSE,E9Q4T0_MOUSE,E9QKG8_MOUSE,F6XR06_MOUSE	Holliday junction recognition protein,Holliday junction recognition protein,Holliday junction recognition protein,Holliday junction recognition protein	Hjurp,Hjurp,Hjurp,Hjurp	ENSMUST00000147393,ENSMUST00000065420,ENSMUST00000054674,ENSMUST00000127446	ENSMUSP00000120753,ENSMUSP00000070419,ENSMUSP00000054263,ENSMUSP00000118659	ENSMUSG00000044783,ENSMUSG00000044783,ENSMUSG00000044783,ENSMUSG00000044783	12887.5	14804.9	10970.1	-0.432463	6.97256e-09	6.32411e-06
ENSMUSG00000027326	chr2	119047119	119105501	+	Casc5	protein_coding	A3KGI3,A3KGI5,A3KGI6,Q66JQ7 A3KGI4 Q8CCH6 Q9CV38	A3KGI3_MOUSE,A3KGI5_MOUSE,A3KGI6_MOUSE,CASC5_MOUSE	Protein CASC5,Protein CASC5,Protein CASC5,Protein CASC5	Casc5,Casc5,Casc5,Casc5 Knl1	ENSMUST00000028802 ENSMUST00000099542,ENSMUST00000152380,ENSMUST00000153300,ENSMUST00000028799	ENSMUSP00000028802,ENSMUSP00000118646,ENSMUSP00000120905,ENSMUSP00000028799	ENSMUSG00000027326,ENSMUSG00000027326,ENSMUSG00000027326,ENSMUSG00000027326	2519.78	2897.49	2142.07	-0.435624	2.86855e-06	0.000511825
ENSMUSG00000028175	chr3	159495433	159529955	+	Depdc1a	protein_coding	D3Z6J1,Q8CIG0 Q8BHF1 Q99JN3	D3Z6J1_MOUSE,DEP1A_MOUSE	DEP domain containing 1a, isoform CRA_c DEP domain-containing protein 1A,DEP domain-containing protein 1A	Depdc1a mCG_2598,Depdc1a	ENSMUST00000120272,ENSMUST00000029825 ENSMUST00000106041	ENSMUSP00000113216,ENSMUSP00000029825	ENSMUSG00000028175,ENSMUSG00000028175	516.555	594.721	438.39	-0.439134	0.000876709	0.0339576
ENSMUSG00000052353	chr7	83932857	84086502	-	Cemip	protein_coding	Q8BI06 E9QJS6 Q6L9J4 Q9EPQ3 Q9EPQ4	CEMIP_MOUSE	Cell migration-inducing and hyaluronan-binding protein	Cemip Kiaa1199	ENSMUST00000064174	ENSMUSP00000063277	ENSMUSG00000052353	928.626	1071.83	785.423	-0.448043	0.000228457	0.0126864
ENSMUSG00000047534	chr12	65132734	65172604	-	Mis18bp1	protein_coding	Q80WQ8 Q571G6 Q8BPR7 Q8CBB5 Q8CG92	M18BP_MOUSE	Mis18-binding protein 1	Mis18bp1 Kiaa1903 Knl2 M18bp1	ENSMUST00000052201	ENSMUSP00000052109	ENSMUSG00000047534	2112.17	2444.06	1780.27	-0.456964	1.79985e-07	6.12173e-05
ENSMUSG00000078773	chr4	11558922	11615805	+	Rad54b	protein_coding	A2AIU9,J3QN23,Q6PFE3 A2AIV0,Q8BKE5 Q8BJX8	A2AIU9_MOUSE,J3QN23_MOUSE,RA54B_MOUSE,FSBP_MOUSE	DNA repair and recombination protein RAD54B,DNA repair and recombination protein RAD54B,DNA repair and recombination protein RAD54B,Fibrinogen silencer-binding protein	Rad54b,Rad54b,Rad54b,Fsbp	ENSMUST00000108306,ENSMUST00000178725,ENSMUST00000070755,ENSMUST00000178703 ENSMUST00000180239	ENSMUSP00000103942,ENSMUSP00000136561,ENSMUSP00000066977,ENSMUSP00000136229	ENSMUSG00000078773,ENSMUSG00000078773,ENSMUSG00000078773,ENSMUSG00000078773	605.533	701.334	509.731	-0.459593	0.000934765	0.0352041
ENSMUSG00000097347	chr1	180802568	180809483	+	Gm17275	lincRNA								589.382	685.913	492.85	-0.476052	0.000543181	0.0248701
ENSMUSG00000015222	chr1	66175273	66442583	+	Map2	protein_coding	E9Q8Y2,F7ALC8,G3UWW1,G3UXY3,G3UYR3,G3UZE9,G3UZJ2,G3UZK9,G3UZV6,P20357 E9QLE1,Q3TLQ0,Q80X35,Q80ZL4	E9Q8Y2_MOUSE,F7ALC8_MOUSE,G3UWW1_MOUSE,G3UXY3_MOUSE,G3UYR3_MOUSE,G3UZE9_MOUSE,G3UZJ2_MOUSE,G3UZK9_MOUSE,G3UZV6_MOUSE,MTAP2_MOUSE,Q3TLQ0_MOUSE,Q80X35_MOUSE,Q80ZL4_MOUSE	Microtubule-associated protein 2,Microtubule-associated protein 2,Microtubule-associated protein,Microtubule-associated protein 2,Microtubule-associated protein 2,Microtubule-associated protein 2,Microtubule-associated protein,Microtubule-associated protein 2,Microtubule-associated protein,Microtubule-associated protein 2,Microtubule-associated protein,Microtubule-associated protein,Microtubule-a…	Map2 Mtap2,Map2 Mtap2,Map2 Mtap2,Map2 Mtap2,Map2 Mtap2,Map2 Mtap2,Map2 Mtap2,Map2 Mtap2,Map2 Mtap2,Map2 Mtap2,Map2 Mtap2,Map2 Mtap2,Map2 Mtap2	ENSMUST00000123647,ENSMUST00000141148,ENSMUST00000172886,ENSMUST00000156636,ENSMUST00000172486,ENSMUST00000173855,ENSMUST00000173800,ENSMUST00000145419,ENSMUST00000173778,ENSMUST00000114013,ENSMUST00000114017 ENSMUST00000114018,ENSMUST00000114012,ENSMUST00000024639 ENSMUST00000077355 ENSMUST00000114015	ENSMUSP00000119341,ENSMUSP00000117996,ENSMUSP00000133446,ENSMUSP00000133871,ENSMUSP00000134187,ENSMUSP00000134471,ENSMUSP00000134518,ENSMUSP00000134538,ENSMUSP00000134651,ENSMUSP00000109646,ENSMUSP00000109650,ENSMUSP00000109645,ENSMUSP00000024639	ENSMUSG00000015222,ENSMUSG00000015222,ENSMUSG00000015222,ENSMUSG00000015222,ENSMUSG00000015222,ENSMUSG00000015222,ENSMUSG00000015222,ENSMUSG00000015222,ENSMUSG00000015222,ENSMUSG00000015222,ENSMUSG00000015222,ENSMUSG00000015222,ENSMUSG00000015222	923.863	1075.93	771.799	-0.478758	0.000243334	0.013376
ENSMUSG00000034206	chr16	37011786	37095417	+	Polq	protein_coding	Q80XB7,Q8BGX6,Q8CGS6	Q80XB7_MOUSE,Q8BGX6_MOUSE,Q8CGS6_MOUSE	DNA polymerase theta Polymerase (DNA directed), theta Polymerase (DNA directed), theta, isoform CRA_a Protein Polq,DNA polymerase theta isoform 1 DNA polymerase theta isoform 2 Protein Polq,DNA polymerase theta short isoform Protein Polq	Polq mCG_128238,Polq,Polq	ENSMUST00000054034,ENSMUST00000182946 ENSMUST00000183112,ENSMUST00000071452	ENSMUSP00000059757,ENSMUSP00000138685,ENSMUSP00000071396	ENSMUSG00000034206,ENSMUSG00000034206,ENSMUSG00000034206	640.421	747.752	533.091	-0.487403	0.000152086	0.00956823
ENSMUSG00000045871	chr14	110748578	110755149	-	Slitrk6	protein_coding	Q8C110 Q8BLL0	SLIK6_MOUSE	SLIT and NTRK-like protein 6	Slitrk6 Sltk6	ENSMUST00000078386	ENSMUSP00000077492	ENSMUSG00000045871	638.241	745.27	531.212	-0.487696	0.000821087	0.0330132
ENSMUSG00000035835	chr10	79860475	79874634	-	Lppr3	protein_coding	E9PVZ4,E9PZA9,E9Q4F1,E9Q8U7,E9QAX3,Q7TPB0 Q4V781 Q68FN2 Q6NZQ9	E9PVZ4_MOUSE,E9PZA9_MOUSE,E9Q4F1_MOUSE,E9Q8U7_MOUSE,E9QAX3_MOUSE,LPPR3_MOUSE	Protein BC005764,Protein BC005764,Protein BC005764,Protein BC005764,Protein BC005764,Lipid phosphate phosphatase-related protein type 3	BC005764,BC005764,BC005764,BC005764,BC005764,Lppr3 Kiaa4076 Prg2	ENSMUST00000167707,ENSMUST00000167897,ENSMUST00000166023,ENSMUST00000165601,ENSMUST00000167250,ENSMUST00000092325	ENSMUSP00000132994,ENSMUSP00000127972,ENSMUSP00000127171,ENSMUSP00000128681,ENSMUSP00000130695,ENSMUSP00000089979	ENSMUSG00000035835,ENSMUSG00000035835,ENSMUSG00000035835,ENSMUSG00000035835,ENSMUSG00000035835,ENSMUSG00000035835	659.713	770.607	548.818	-0.488913	0.000116352	0.00786571
ENSMUSG00000053199	chr9	51765337	51853856	+	Arhgap20	protein_coding	D3YUH8,Q6IFT4 Q6ZPS4 Q8BLZ7 Q8BXI4	D3YUH8_MOUSE,RHG20_MOUSE	Rho GTPase-activating protein 20,Rho GTPase-activating protein 20	Arhgap20,Arhgap20 Kiaa1391	ENSMUST00000130405,ENSMUST00000065496	ENSMUSP00000120124,ENSMUSP00000065633	ENSMUSG00000053199,ENSMUSG00000053199	1173.35	1377.47	969.244	-0.506644	1.96134e-05	0.00211358
ENSMUSG00000030854	chr7	47077798	47133684	-	Ptpn5	protein_coding	P54830 Q64694 Q8CAN0	PTN5_MOUSE	Tyrosine-protein phosphatase non-receptor type 5	Ptpn5	ENSMUST00000033142 ENSMUST00000102626 ENSMUST00000107617	ENSMUSP00000033142	ENSMUSG00000030854	351.924	416.222	287.626	-0.531615	0.000861805	0.0336196
ENSMUSG00000035459	chr10	86841198	87008025	-	Stab2	protein_coding	F7CNH8,Q8R4U0 Q8BM87	F7CNH8_MOUSE,STAB2_MOUSE	Stabilin-2,Stabilin-2	Stab2,Stab2 Feel2 Hare	ENSMUST00000161560,ENSMUST00000035288	ENSMUSP00000125263,ENSMUSP00000048309	ENSMUSG00000035459,ENSMUSG00000035459	633.541	749.925	517.157	-0.535277	2.49627e-05	0.00246994
ENSMUSG00000106099	chr3	119743208	119746446	-	RP23-235E15,6	sense_intronic								486.495	594.307	378.684	-0.648836	7.81377e-06	0.00103117
ENSMUSG00000054717	chr8	57511843	57515999	+	Hmgb2	protein_coding	P30681 Q3UXT1 Q9EQD5	HMGB2_MOUSE	High mobility group protein B2	Hmgb2 Hmg2	ENSMUST00000067925	ENSMUSP00000065940	ENSMUSG00000054717	4038.75	4349.87	3727.63	-0.222655	0.00159516	0.0504703
ENSMUSG00000060519	chr1	156653617	156674356	-	Tor3a	protein_coding	M0QWH2,Q9ER38 Q3T9Q6 Q3TDA9 Q3U5X1 Q3U8F2 Q9CR17 Q9CU67	M0QWH2_MOUSE,TOR3A_MOUSE	Torsin-3A,Torsin-3A	Tor3a,Tor3a Adir	ENSMUST00000150557,ENSMUST00000079625 ENSMUST00000122242	ENSMUSP00000137828,ENSMUSP00000078572	ENSMUSG00000060519,ENSMUSG00000060519	759.555	661.196	857.915	0.375257	0.00160076	0.0505005
ENSMUSG00000026600	chr1	156424525	156474331	-	Soat1	protein_coding	Q61263 Q5XK32 Q64180	SOAT1_MOUSE	Sterol O-acyltransferase 1	Soat1 Acact	ENSMUST00000051396	ENSMUSP00000058344	ENSMUSG00000026600	3330.23	3076.49	3583.98	0.220213	0.00161059	0.0506636
ENSMUSG00000046782	chr12	57564113	57737928	+	4921506M07Rik	protein_coding	G3UWJ3,G3UYY4,Q497K6	G3UWJ3_MOUSE,G3UYY4_MOUSE,Q497K6_MOUSE	Protein Ttc6,Protein Ttc6,Protein Ttc6 Uncharacterized protein	Ttc6,Ttc6,4921506M07Rik Ttc6	ENSMUST00000172852,ENSMUST00000172939,ENSMUST00000101398	ENSMUSP00000133313,ENSMUSP00000134273,ENSMUSP00000098946	ENSMUSG00000046782,ENSMUSG00000046782,ENSMUSG00000046782	935.562	1053.4	817.719	-0.364988	0.00161947	0.0507964
ENSMUSG00000046805	chr19	12460779	12465284	+	Mpeg1	protein_coding	E9QN37	E9QN37_MOUSE	Macrophage-expressed gene 1 protein	Mpeg1	ENSMUST00000081035	ENSMUSP00000108573	ENSMUSG00000046805	782.888	680.403	885.373	0.379407	0.00163703	0.0511996
ENSMUSG00000028618	chr4	107178399	107200996	+	Tmem59	protein_coding	D3YVM2,D3Z0H8,D6RI96,Q9QY73 Q3TWB4 Q99LY8 Q9D1P9	D3YVM2_MOUSE,D3Z0H8_MOUSE,D6RI96_MOUSE,TMM59_MOUSE	Transmembrane protein 59,Transmembrane protein 59,Transmembrane protein 59,Transmembrane protein 59	Tmem59,Tmem59,Tmem59,Tmem59 ORF18 Tdcf1	ENSMUST00000106753,ENSMUST00000128123,ENSMUST00000154007,ENSMUST00000030361	ENSMUSP00000102364,ENSMUSP00000120288,ENSMUSP00000119701,ENSMUSP00000030361	ENSMUSG00000028618,ENSMUSG00000028618,ENSMUSG00000028618,ENSMUSG00000028618	5762.84	5346.64	6179.03	0.208712	0.00166412	0.0518975
ENSMUSG00000005233	chr2	69193895	69206194	-	Spc25	protein_coding	A2AUT1,A2AUT3,A2AUT4,Q3UA16 Q9D021 Q9D1K6	A2AUT1_MOUSE,A2AUT3_MOUSE,A2AUT4_MOUSE,SPC25_MOUSE	Kinetochore protein Spc25,Kinetochore protein Spc25,Kinetochore protein Spc25,Kinetochore protein Spc25	Spc25,Spc25,Spc25,Spc25 Spbc25	ENSMUST00000149045,ENSMUST00000149643,ENSMUST00000127243,ENSMUST00000005365 ENSMUST00000112320 ENSMUST00000167875	ENSMUSP00000120999,ENSMUSP00000117415,ENSMUSP00000120142,ENSMUSP00000005365	ENSMUSG00000005233,ENSMUSG00000005233,ENSMUSG00000005233,ENSMUSG00000005233	1517.32	1659.99	1374.64	-0.271938	0.00166899	0.0519008
ENSMUSG00000045328	chr3	135212537	135273611	+	Cenpe	protein_coding	E9QKK1	E9QKK1_MOUSE	Centromere-associated protein E	Cenpe	ENSMUST00000062893	ENSMUSP00000057938	ENSMUSG00000045328	3351.49	3644.43	3058.54	-0.252776	0.00167531	0.0519489
ENSMUSG00000039298	chr4	70216856	70410443	-	Cdk5rap2	protein_coding	F6R2K5,H7BX43,Q5SP75,Q8K389 A2AVA1 Q6PCN1 Q6ZPL0	F6R2K5_MOUSE,H7BX43_MOUSE,Q5SP75_MOUSE,CK5P2_MOUSE	CDK5 regulatory subunit-associated protein 2,CDK5 regulatory subunit-associated protein 2,CDK5 regulatory subunit-associated protein 2,CDK5 regulatory subunit-associated protein 2	Cdk5rap2,Cdk5rap2,Cdk5rap2,Cdk5rap2 Kiaa1633	ENSMUST00000140108,ENSMUST00000076541,ENSMUST00000138561,ENSMUST00000144099	ENSMUSP00000119151,ENSMUSP00000075856,ENSMUSP00000116928,ENSMUSP00000119891	ENSMUSG00000039298,ENSMUSG00000039298,ENSMUSG00000039298,ENSMUSG00000039298	2192.76	2394.69	1990.84	-0.266338	0.001683	0.0520392
ENSMUSG00000003518	chr11	101971143	101987013	-	Dusp3	protein_coding	B1AQF4,H3BKD1,H3BKL8,H3BLK2,Q3V2Y9,Q9D7X3	B1AQF4_MOUSE,H3BKD1_MOUSE,H3BKL8_MOUSE,H3BLK2_MOUSE,Q3V2Y9_MOUSE,DUS3_MOUSE	Dual-specificity protein phosphatase 3,Dual-specificity protein phosphatase 3,Dual-specificity protein phosphatase 3,Dual-specificity protein phosphatase 3,Dual-specificity protein phosphatase 3,Dual specificity protein phosphatase 3	Dusp3,Dusp3,Dusp3,Dusp3,Dusp3,Dusp3	ENSMUST00000107173,ENSMUST00000125794,ENSMUST00000176261,ENSMUST00000143177,ENSMUST00000151678,ENSMUST00000003612 ENSMUST00000107172	ENSMUSP00000102791,ENSMUSP00000135343,ENSMUSP00000135443,ENSMUSP00000135821,ENSMUSP00000135384,ENSMUSP00000003612	ENSMUSG00000003518,ENSMUSG00000003518,ENSMUSG00000003518,ENSMUSG00000003518,ENSMUSG00000003518,ENSMUSG00000003518	1120.21	1004.45	1235.97	0.298969	0.00171485	0.0528738
ENSMUSG00000020782	chr11	115824049	115855780	+	Llgl2	protein_coding	B1ATA7,B1ATA8,B1ATA9,F6X6X1,G3UXR0,G3UXS2,J3QJU5,Q3TJ91 B1ATB0 Q6YP20 Q8K1X0	B1ATA7_MOUSE,B1ATA8_MOUSE,B1ATA9_MOUSE,F6X6X1_MOUSE,G3UXR0_MOUSE,G3UXS2_MOUSE,J3QJU5_MOUSE,L2GL2_MOUSE	Lethal(2) giant larvae protein homolog 2,Lethal(2) giant larvae protein homolog 2,Lethal(2) giant larvae protein homolog 2,Lethal(2) giant larvae protein homolog 2,Lethal(2) giant larvae protein homolog 2,Lethal(2) giant larvae protein homolog 2,Lethal(2) giant larvae protein homolog 2,Lethal(2) giant larvae protein homolog 2	Llgl2,Llgl2,Llgl2,Llgl2,Llgl2,Llgl2,Llgl2,Llgl2 Llglh2	ENSMUST00000155878,ENSMUST00000133250,ENSMUST00000137900,ENSMUST00000128826,ENSMUST00000173289,ENSMUST00000172552,ENSMUST00000177736,ENSMUST00000103032	ENSMUSP00000117649,ENSMUSP00000118344,ENSMUSP00000119675,ENSMUSP00000118304,ENSMUSP00000133790,ENSMUSP00000133803,ENSMUSP00000136054,ENSMUSP00000099321	ENSMUSG00000020782,ENSMUSG00000020782,ENSMUSG00000020782,ENSMUSG00000020782,ENSMUSG00000020782,ENSMUSG00000020782,ENSMUSG00000020782,ENSMUSG00000020782	2945.16	2712.92	3177.41	0.227929	0.00173446	0.0531772
ENSMUSG00000053897	chr3	135825279	135888572	+	Slc39a8	protein_coding	Q91W10 Q8BTQ3 Q8BUD6 Q9D426 Q9D5V4	S39A8_MOUSE	Zinc transporter ZIP8	Slc39a8 Zip8	ENSMUST00000029810 ENSMUST00000081978 ENSMUST00000167390 ENSMUST00000180196	ENSMUSP00000029810	ENSMUSG00000053897	2297.9	2104.04	2491.76	0.243895	0.00173115	0.0531772
ENSMUSG00000022443	chr15	77760587	77842175	-	Myh9	protein_coding	F2Z494,Q8VDD5 Q3UHT9 Q3UHU4 Q6KAN6 Q811I2	F2Z494_MOUSE,MYH9_MOUSE	Myosin-9,Myosin-9	Myh9,Myh9	ENSMUST00000123101,ENSMUST00000016771	ENSMUSP00000116198,ENSMUSP00000016771	ENSMUSG00000022443,ENSMUSG00000022443	13980.5	13049	14912	0.192514	0.00176056	0.0533758
ENSMUSG00000022562	chr15	76296597	76328015	-	Oplah	protein_coding	E9PZB8,E9Q484,Q8K010 Q8R3K2	E9PZB8_MOUSE,E9Q484_MOUSE,OPLA_MOUSE	5-oxoprolinase,5-oxoprolinase,5-oxoprolinase	Oplah,Oplah,Oplah	ENSMUST00000165279,ENSMUST00000164189,ENSMUST00000023222 ENSMUST00000171340	ENSMUSP00000127955,ENSMUSP00000131967,ENSMUSP00000023222	ENSMUSG00000022562,ENSMUSG00000022562,ENSMUSG00000022562	1104.21	983.779	1224.63	0.315656	0.0017528	0.0533758
ENSMUSG00000030346	chr6	126923050	126939587	-	Rad51ap1	protein_coding	D3Z7I5,Q8C551 O55219 Q8BP36 Q99L94 Q9D0J0	D3Z7I5_MOUSE,R51A1_MOUSE	RAD51-associated protein 1,RAD51-associated protein 1	Rad51ap1,Rad51ap1	ENSMUST00000144954,ENSMUST00000112220 ENSMUST00000112221	ENSMUSP00000122978,ENSMUSP00000107839	ENSMUSG00000030346,ENSMUSG00000030346	1032.89	1150.01	915.766	-0.328275	0.00176025	0.0533758
ENSMUSG00000093930	chr13	119690462	119708086	+	Hmgcs1	protein_coding	Q8JZK9 Q3UXI4	HMCS1_MOUSE	Hydroxymethylglutaryl-CoA synthase, cytoplasmic	Hmgcs1	ENSMUST00000179869	ENSMUSP00000136944	ENSMUSG00000093930	4167.4	3850.95	4483.85	0.21947	0.00175813	0.0533758
ENSMUSG00000030560	chr7	88278085	88310888	+	Ctsc	protein_coding	D3Z220,P97821 O08853	D3Z220_MOUSE,CATC_MOUSE	Dipeptidyl peptidase 1,Dipeptidyl peptidase 1	Ctsc,Ctsc	ENSMUST00000128791,ENSMUST00000032779	ENSMUSP00000119503,ENSMUSP00000032779	ENSMUSG00000030560,ENSMUSG00000030560	7418.72	6837.49	7999.96	0.226495	0.001789	0.0540873
ENSMUSG00000000957	chr14	54431612	54441265	+	Mmp14	protein_coding	P53690 O08645 O35369 Q8BTX2	MMP14_MOUSE	Matrix metalloproteinase-14	Mmp14 Mtmmp	ENSMUST00000089688	ENSMUSP00000087119	ENSMUSG00000000957	6900.91	6450.26	7351.57	0.188666	0.00180192	0.0541875
ENSMUSG00000022463	chr15	82147266	82205376	+	Srebf2	protein_coding	Q3U1N2 Q925C2 Q9ESZ4	SRBP2_MOUSE	Sterol regulatory element-binding protein 2	Srebf2 Srebp2	ENSMUST00000023100	ENSMUSP00000023100	ENSMUSG00000022463	4355.74	4042.24	4669.25	0.207988	0.00180227	0.0541875
ENSMUSG00000042099	chr17	33810520	33822918	+	Kank3	protein_coding	G3UXN4,G3UZW1,Q6P8V1,Q9Z1P7	G3UXN4_MOUSE,G3UZW1_MOUSE,Q6P8V1_MOUSE,KANK3_MOUSE	KN motif and ankyrin repeat domain-containing protein 3,KN motif and ankyrin repeat domain-containing protein 3,KN motif and ankyrin repeat domain-containing protein 3 Kank3 protein,KN motif and ankyrin repeat domain-containing protein 3	Kank3,Kank3,Kank3 Ankrd47 D17Ertd288e,Kank3 Ankrd47 D17Ertd288e Ng28	ENSMUST00000172649,ENSMUST00000174608,ENSMUST00000173789,ENSMUST00000048560	ENSMUSP00000133760,ENSMUSP00000134656,ENSMUSP00000133625,ENSMUSP00000040126	ENSMUSG00000042099,ENSMUSG00000042099,ENSMUSG00000042099,ENSMUSG00000042099	2650.51	2434.73	2866.3	0.235337	0.00182702	0.0547804
ENSMUSG00000033917	chr7	118688545	118705778	-	Gde1	protein_coding	D3Z3E2,Q9JL56 Q3UBU4	D3Z3E2_MOUSE,GDE1_MOUSE	Glycerophosphodiester phosphodiesterase 1,Glycerophosphodiester phosphodiesterase 1	Gde1,Gde1 Mir16	ENSMUST00000132509,ENSMUST00000038791	ENSMUSP00000122015,ENSMUSP00000046371	ENSMUSG00000033917,ENSMUSG00000033917	3321.53	3026.57	3616.49	0.256825	0.00183588	0.0547923
ENSMUSG00000068220	chr15	78926725	78930465	+	Lgals1	protein_coding	P16045 P05163 P11946 P17601 Q4FZH4 Q99M27 Q9D0X0	LEG1_MOUSE	Galectin-1	Lgals1 Gbp	ENSMUST00000089377	ENSMUSP00000086795	ENSMUSG00000068220	4987.13	5357.19	4617.07	-0.214455	0.00183749	0.0547923
ENSMUSG00000028483	chr4	83417724	83467676	+	Snapc3	protein_coding	E0CY59,Q9CQB0,Q9D2C9 Q8C0A5	E0CY59_MOUSE,Q9CQB0_MOUSE,SNPC3_MOUSE	snRNA-activating protein complex subunit 3,snRNA-activating protein complex subunit 3,snRNA-activating protein complex subunit 3	Snapc3,Snapc3,Snapc3	ENSMUST00000137512,ENSMUST00000071544,ENSMUST00000030206 ENSMUST00000123262 ENSMUST00000124856 ENSMUST00000143533	ENSMUSP00000124468,ENSMUSP00000102842,ENSMUSP00000030206	ENSMUSG00000028483,ENSMUSG00000028483,ENSMUSG00000028483	1952.35	2126.17	1778.54	-0.257433	0.00186209	0.0553742
ENSMUSG00000027641	chr2	157145893	157204534	-	Rbl1	protein_coding	Q64701 Q3U1D4	RBL1_MOUSE	Retinoblastoma-like protein 1	Rbl1	ENSMUST00000029170	ENSMUSP00000029170	ENSMUSG00000027641	1905.11	2086.19	1724.02	-0.274944	0.00188759	0.0558274
ENSMUSG00000029414	chr5	123749716	123821593	+	Kntc1	protein_coding	Q8C3Y4 Q6A0B3	KNTC1_MOUSE	Kinetochore-associated protein 1	Kntc1 Kiaa0166	ENSMUST00000031366	ENSMUSP00000031366	ENSMUSG00000029414	1429.86	1573.8	1285.91	-0.291257	0.00188364	0.0558274
ENSMUSG00000023043	chr15	102028216	102032026	+	Krt18	protein_coding	P05784 Q3TIX1 Q3TJH6 Q3TJW7 Q61766	K1C18_MOUSE	Keratin, type I cytoskeletal 18	Krt18 Kerd Krt1-18	ENSMUST00000023803	ENSMUSP00000023803	ENSMUSG00000023043	3284.96	3015.32	3554.61	0.237305	0.00193395	0.0566587
ENSMUSG00000025747	chr5	30058202	30073617	-	Tyms	protein_coding	D6RCW9,P07607	D6RCW9_MOUSE,TYSY_MOUSE	Thymidylate synthase,Thymidylate synthase	Tyms,Tyms	ENSMUST00000141630,ENSMUST00000026846	ENSMUSP00000123377,ENSMUSP00000026846	ENSMUSG00000025747,ENSMUSG00000025747	1591.64	1741.47	1441.81	-0.272255	0.00192458	0.0566587
ENSMUSG00000036661	chr15	73512560	73572242	+	Dennd3	protein_coding	A2RT67 B2RQ75 Q69ZX2 Q8C6V5,F6SUD2,F7B6S5,G3UYA1	DEND3_MOUSE,F6SUD2_MOUSE,F7B6S5_MOUSE,G3UYA1_MOUSE	DENN domain-containing protein 3,DENN domain-containing protein 3,DENN domain-containing protein 3,DENN domain-containing protein 3	Dennd3 Kiaa0870,Dennd3,Dennd3,Dennd3	ENSMUST00000043414,ENSMUST00000160267,ENSMUST00000162488,ENSMUST00000173292	ENSMUSP00000046774,ENSMUSP00000124538,ENSMUSP00000125657,ENSMUSP00000134002	ENSMUSG00000036661,ENSMUSG00000036661,ENSMUSG00000036661,ENSMUSG00000036661	2112.75	1934.99	2290.52	0.243233	0.00192986	0.0566587
ENSMUSG00000067377	chrX	133891068	133898429	-	Tspan6	protein_coding	H3BJJ0,H3BL26,Q99L96	H3BJJ0_MOUSE,H3BL26_MOUSE,Q99L96_MOUSE	Tetraspanin-6,Tetraspanin-6,Tetraspanin 6 Tetraspanin-6	Tspan6,Tspan6,Tspan6 Tm4sf6 mCG_9501	ENSMUST00000176718,ENSMUST00000176641,ENSMUST00000087557	ENSMUSP00000135005,ENSMUSP00000135626,ENSMUSP00000084838	ENSMUSG00000067377,ENSMUSG00000067377,ENSMUSG00000067377	1873.36	2037.3	1709.41	-0.25303	0.00193652	0.0566587
ENSMUSG00000045092	chr3	115710433	115715072	-	S1pr1	protein_coding	O08530 Q9DC35 Q9R235	S1PR1_MOUSE	Sphingosine 1-phosphate receptor 1	S1pr1 Edg1 Lpb1	ENSMUST00000055676	ENSMUSP00000050897	ENSMUSG00000045092	2212.39	2031.2	2393.57	0.23672	0.0019613	0.0570771
ENSMUSG00000056429	chr6	72608432	72617000	-	Tgoln1	protein_coding	Q62313	TGON1_MOUSE	Trans-Golgi network integral membrane protein 1	Tgoln1 Ttgn1	ENSMUST00000070524	ENSMUSP00000068487	ENSMUSG00000056429	3371.69	3115.63	3627.75	0.219484	0.00195813	0.0570771
ENSMUSG00000053113	chr11	117966079	117970047	-	Socs3	protein_coding	O35718 P97803 Q3U7X5	SOCS3_MOUSE	Suppressor of cytokine signaling 3	Socs3 Cis3 Cish3	ENSMUST00000054002	ENSMUSP00000059129	ENSMUSG00000053113	471.325	397.849	544.801	0.45253	0.00197087	0.0572026
ENSMUSG00000053907	chr6	72432799	72439558	-	Mat2a	protein_coding	Q3THS6 Q3TL60 Q76LX3	METK2_MOUSE	S-adenosylmethionine synthase isoform type-2	Mat2a	ENSMUST00000059472	ENSMUSP00000087118	ENSMUSG00000053907	7305.29	7835.62	6774.96	-0.209807	0.00199346	0.0577043
ENSMUSG00000046733	chr6	135065651	135084709	+	Gprc5a	protein_coding	G5E8C3	G5E8C3_MOUSE	G protein-coupled receptor, family C, group 5, member A Retinoic acid-induced protein 3	Gprc5a mCG_22262	ENSMUST00000050104	ENSMUSP00000061062	ENSMUSG00000046733	7238	5752.08	8723.92	0.600807	0.00201481	0.0581676
ENSMUSG00000029267	chr5	108065674	108109004	+	Mtf2	protein_coding	E9PYX9,E9PZE8,E9PZQ6,E9Q5U4,E9Q8G7,E9QAD3,F6Q1Z6,M0QWI3,Q02395 Q05C61 Q569Z8 Q6PG89 Q8BGP9 Q8BSJ7	E9PYX9_MOUSE,E9PZE8_MOUSE,E9PZQ6_MOUSE,E9Q5U4_MOUSE,E9Q8G7_MOUSE,E9QAD3_MOUSE,F6Q1Z6_MOUSE,M0QWI3_MOUSE,MTF2_MOUSE	Metal-response element-binding transcription factor 2,Metal-response element-binding transcription factor 2,Metal-response element-binding transcription factor 2,Metal-response element-binding transcription factor 2,Metal-response element-binding transcription factor 2,Metal-response element-binding transcription factor 2,Metal-response element-binding transcription factor 2,Metal-response elemen…	Mtf2,Mtf2,Mtf2,Mtf2,Mtf2,Mtf2,Mtf2,Mtf2,Mtf2 Pcl2	ENSMUST00000172045,ENSMUST00000143412,ENSMUST00000124195,ENSMUST00000170319,ENSMUST00000134026,ENSMUST00000112626,ENSMUST00000137996,ENSMUST00000129921,ENSMUST00000081567	ENSMUSP00000126452,ENSMUSP00000132596,ENSMUSP00000126297,ENSMUSP00000130536,ENSMUSP00000128797,ENSMUSP00000108245,ENSMUSP00000121697,ENSMUSP00000137843,ENSMUSP00000080278	ENSMUSG00000029267,ENSMUSG00000029267,ENSMUSG00000029267,ENSMUSG00000029267,ENSMUSG00000029267,ENSMUSG00000029267,ENSMUSG00000029267,ENSMUSG00000029267,ENSMUSG00000029267	2495.3	2709.95	2280.64	-0.248727	0.00206094	0.059342
ENSMUSG00000030134	chr6	118066385	118091546	+	Rasgef1a	protein_coding	E9Q1N6	E9Q1N6_MOUSE	Protein Rasgef1a	Rasgef1a	ENSMUST00000164960	ENSMUSP00000132244	ENSMUSG00000030134	831.005	731.05	930.96	0.348326	0.00209073	0.0598828
ENSMUSG00000062949	chrX	60223290	60592698	-	Atp11c	protein_coding	E9QKK8,F6Q8D3,Q9QZW0 Q3KQR4	E9QKK8_MOUSE,F6Q8D3_MOUSE,AT11C_MOUSE	Probable phospholipid-transporting ATPase 11C,Probable phospholipid-transporting ATPase 11C,Probable phospholipid-transporting ATPase 11C	Atp11c,Atp11c,Atp11c	ENSMUST00000033480,ENSMUST00000154051,ENSMUST00000101527	ENSMUSP00000033480,ENSMUSP00000119320,ENSMUSP00000099066	ENSMUSG00000062949,ENSMUSG00000062949,ENSMUSG00000062949	2118.36	2297.82	1938.91	-0.244904	0.00208524	0.0598828
ENSMUSG00000028212	chr4	11191351	11204779	+	Ccne2	protein_coding	A2API1,Q9Z238 Q9QWU5	A2API1_MOUSE,CCNE2_MOUSE	Cyclin E2, isoform CRA_a G1/S-specific cyclin-E2,G1/S-specific cyclin-E2	Ccne2 mCG_5098,Ccne2	ENSMUST00000029866,ENSMUST00000108324 ENSMUST00000170901	ENSMUSP00000029866,ENSMUSP00000103960	ENSMUSG00000028212,ENSMUSG00000028212	1407.37	1542.14	1272.59	-0.276965	0.00213613	0.0610226
ENSMUSG00000026303	chr1	90915085	90951142	+	Mlph	protein_coding	D3Z049,Q91V27 Q3UFV7 Q99N53	D3Z049_MOUSE,MELPH_MOUSE	Melanophilin,Melanophilin	Mlph,Mlph Ln Slac2a	ENSMUST00000125149,ENSMUST00000027528	ENSMUSP00000123314,ENSMUSP00000027528	ENSMUSG00000026303,ENSMUSG00000026303	412.847	346.066	479.629	0.469714	0.00217106	0.0616967
ENSMUSG00000058897	chr3	130131501	130599877	+	Col25a1	protein_coding	E9Q5L6,Q99MQ5 G3X9H6,V9GWX5	E9Q5L6_MOUSE,COPA1_MOUSE,V9GWX5_MOUSE	Collagen alpha-1(XXV) chain,Collagen alpha-1(XXV) chain,Collagen alpha-1(XXV) chain	Col25a1,Col25a1,Col25a1	ENSMUST00000106353,ENSMUST00000080335,ENSMUST00000183368	ENSMUSP00000101960,ENSMUSP00000079210,ENSMUSP00000138875	ENSMUSG00000058897,ENSMUSG00000058897,ENSMUSG00000058897	3977.57	4266.09	3689.05	-0.20961	0.00216641	0.0616967
ENSMUSG00000054619	chr15	100304817	100314348	+	Mettl7a1	protein_coding	Q8C6B0	Q8C6B0_MOUSE	MCG20149, isoform CRA_a Methyltransferase like 7A1 Protein Mettl7a1	Mettl7a1 Mettl7a mCG_20149	ENSMUST00000067752	ENSMUSP00000065271	ENSMUSG00000054619	1780.37	1608.19	1952.55	0.279763	0.00217744	0.0617168
ENSMUSG00000037242	chr4	135213969	135272814	-	Clic4	protein_coding	Q9QYB1 Q8BMG5	CLIC4_MOUSE	Chloride intracellular channel protein 4	Clic4	ENSMUST00000037099	ENSMUSP00000041453	ENSMUSG00000037242	7682.85	7165.46	8200.24	0.194582	0.00218835	0.0618649
ENSMUSG00000037572	chr14	47240944	47276857	-	Wdhd1	protein_coding	E9QPB3,P59328 Q6P408	E9QPB3_MOUSE,WDHD1_MOUSE	WD repeat and HMG-box DNA-binding protein 1,WD repeat and HMG-box DNA-binding protein 1	Wdhd1,Wdhd1 And1	ENSMUST00000111791,ENSMUST00000111790 ENSMUST00000111792	ENSMUSP00000107421,ENSMUSP00000107420	ENSMUSG00000037572,ENSMUSG00000037572	1379	1516.49	1241.5	-0.288438	0.00219409	0.0618664
ENSMUSG00000018042	chr15	83153494	83172592	-	Cyb5r3	protein_coding	F2Z456,Q9DCN2	F2Z456_MOUSE,NB5R3_MOUSE	NADH-cytochrome b5 reductase 3,NADH-cytochrome b5 reductase 3	Cyb5r3,Cyb5r3 Dia1	ENSMUST00000162178,ENSMUST00000018186	ENSMUSP00000125636,ENSMUSP00000018186	ENSMUSG00000018042,ENSMUSG00000018042	4173.08	3882.45	4463.7	0.201224	0.00223279	0.062795
ENSMUSG00000019997	chr10	24595442	24598683	+	Ctgf	protein_coding	H3BJW0,H3BK14,P29268 G5E830 Q922U0	H3BJW0_MOUSE,H3BK14_MOUSE,CTGF_MOUSE	Connective tissue growth factor,Connective tissue growth factor,Connective tissue growth factor	Ctgf,Ctgf,Ctgf Ccn2 Fisp-12 Fisp12 Hcs24	ENSMUST00000176228,ENSMUST00000129142,ENSMUST00000020171	ENSMUSP00000135147,ENSMUSP00000135212,ENSMUSP00000020171	ENSMUSG00000019997,ENSMUSG00000019997,ENSMUSG00000019997	1119.53	1004.28	1234.78	0.297813	0.00225822	0.0631837
ENSMUSG00000020486	chr11	87568903	87590539	+	2004-09-01	protein_coding	P28661 B2KGM6 Q3UVH1 Q3UZC3 Q5ND10 Q5ND15 Q5ND16 Q7TPM7 Q80VX1,Q5ND09,Q5ND13,Q5ND18	SEPT4_MOUSE,Q5ND09_MOUSE,Q5ND13_MOUSE,Q5ND18_MOUSE	Septin-4,Septin-4,Septin-4,Septin-4	Sept4 Pnutl2,Sept4,Sept4,Sept4	ENSMUST00000018544 ENSMUST00000063156 ENSMUST00000107960 ENSMUST00000107962 ENSMUST00000122067,ENSMUST00000133202,ENSMUST00000107961,ENSMUST00000122945	ENSMUSP00000018544,ENSMUSP00000115790,ENSMUSP00000103595,ENSMUSP00000115682	ENSMUSG00000020486,ENSMUSG00000020486,ENSMUSG00000020486,ENSMUSG00000020486	3434.57	3113.87	3755.27	0.270127	0.00225253	0.0631837
ENSMUSG00000026872	chr2	44983632	45117395	-	Zeb2	protein_coding	F6X889,H3BKH5,H3BKR1,H3BLE2,H9H9S3,Q9R0G7 Q6P9M5	F6X889_MOUSE,H3BKH5_MOUSE,H3BKR1_MOUSE,H3BLE2_MOUSE,H9H9S3_MOUSE,ZEB2_MOUSE	Zinc finger E-box-binding homeobox 2,Zinc finger E-box-binding homeobox 2,Zinc finger E-box-binding homeobox 2,Zinc finger E-box-binding homeobox 2,Zinc finger E-box-binding homeobox 2,Zinc finger E-box-binding homeobox 2	Zeb2,Zeb2,Zeb2,Zeb2,Zeb2,Zeb2 Sip1 Zfhx1b Zfx1b	ENSMUST00000127520,ENSMUST00000176732,ENSMUST00000153561,ENSMUST00000124942 ENSMUST00000152232,ENSMUST00000076836,ENSMUST00000028229 ENSMUST00000068415 ENSMUST00000176438 ENSMUST00000177302	ENSMUSP00000120130,ENSMUSP00000135393,ENSMUSP00000135491,ENSMUSP00000135790,ENSMUSP00000076111,ENSMUSP00000028229	ENSMUSG00000026872,ENSMUSG00000026872,ENSMUSG00000026872,ENSMUSG00000026872,ENSMUSG00000026872,ENSMUSG00000026872	10502.6	11268.1	9737.07	-0.21066	0.00226445	0.0631955
ENSMUSG00000027463	chr2	151996511	152009258	+	Slc52a3	protein_coding	Q9D6X5 A2AQU3 Q3TDJ6 Q3U328 Q8CE36 Q91WB9	S52A3_MOUSE	Solute carrier family 52, riboflavin transporter, member 3	Slc52a3 Rft2	ENSMUST00000073228 ENSMUST00000109858 ENSMUST00000109859 ENSMUST00000109861	ENSMUSP00000072961	ENSMUSG00000027463	281.487	226.501	336.474	0.5689	0.00227967	0.0634577
ENSMUSG00000056071	chr3	90692632	90695721	-	S100a9	protein_coding	P31725	S10A9_MOUSE	Protein S100-A9	S100a9 Cagb Mrp14	ENSMUST00000069960 ENSMUST00000117167	ENSMUSP00000070842	ENSMUSG00000056071	263.976	215.154	312.798	0.537782	0.00229671	0.063769
ENSMUSG00000000346	chr15	100615628	100620731	+	Dazap2	protein_coding	Q9DCP9 O88675 Q3UVI4	DAZP2_MOUSE	DAZ-associated protein 2	Dazap2 Prtb	ENSMUST00000000356	ENSMUSP00000000356	ENSMUSG00000000346	5009.44	4673	5345.88	0.194039	0.0023168	0.064163
ENSMUSG00000020676	chr11	82057823	82062955	+	Ccl11	protein_coding	P48298	CCL11_MOUSE	Eotaxin	Ccl11 Scya11	ENSMUST00000000342	ENSMUSP00000000342	ENSMUSG00000020676	1290.5	1418.25	1162.76	-0.286338	0.00233636	0.0645405
ENSMUSG00000031381	chrX	164419793	164433916	+	Piga	protein_coding	A2AIH4,M0QWH5,M0QWY7,Q64323 Q6LD71 Q8CCQ6	A2AIH4_MOUSE,M0QWH5_MOUSE,M0QWY7_MOUSE,PIGA_MOUSE	N-acetylglucosaminyl-phosphatidylinositol biosynthetic protein,N-acetylglucosaminyl-phosphatidylinositol biosynthetic protein,N-acetylglucosaminyl-phosphatidylinositol biosynthetic protein,N-acetylglucosaminyl-phosphatidylinositol biosynthetic protein	Piga,Piga,Piga,Piga	ENSMUST00000133813,ENSMUST00000112257,ENSMUST00000151911,ENSMUST00000033754 ENSMUST00000112255	ENSMUSP00000122176,ENSMUSP00000137831,ENSMUSP00000138077,ENSMUSP00000033754	ENSMUSG00000031381,ENSMUSG00000031381,ENSMUSG00000031381,ENSMUSG00000031381	1680.22	1837.34	1523.09	-0.270455	0.0023446	0.0646041
ENSMUSG00000009207	chr2	74520291	74579435	-	Lnp	protein_coding	A2ASL8,A2ASM0,A2ASM1,A2ASM2,Q7TQ95 A2ASL9 Q69ZC5 Q6PAQ1 Q6PEN8	A2ASL8_MOUSE,A2ASM0_MOUSE,A2ASM1_MOUSE,A2ASM2_MOUSE,LNP_MOUSE	Limb and neural patterns, isoform CRA_c Protein lunapark,Protein lunapark,Protein lunapark,Protein lunapark,Protein lunapark	Lnp mCG_13964,Lnp,Lnp,Lnp,Lnp Kiaa1715 Uln	ENSMUST00000102676 ENSMUST00000111993,ENSMUST00000130586,ENSMUST00000130232,ENSMUST00000134168,ENSMUST00000064503	ENSMUSP00000099737,ENSMUSP00000122488,ENSMUSP00000120494,ENSMUSP00000123058,ENSMUSP00000066891	ENSMUSG00000009207,ENSMUSG00000009207,ENSMUSG00000009207,ENSMUSG00000009207,ENSMUSG00000009207	971.039	1073.9	868.177	-0.306483	0.00237264	0.0651248
ENSMUSG00000017009	chr2	164424247	164443887	-	Sdc4	protein_coding	O35988	SDC4_MOUSE	Syndecan-4	Sdc4	ENSMUST00000017153	ENSMUSP00000017153	ENSMUSG00000017009	4892.51	4501.83	5283.19	0.230848	0.00239342	0.0651248
ENSMUSG00000020340	chr11	46193850	46312859	-	Cyfip2	protein_coding	F6QD74,F7C3H9,Q5SQX6 Q3UH21 Q3UHS8 Q8BSW0 Q8CHA9 Q924D3 Q9R181	F6QD74_MOUSE,F7C3H9_MOUSE,CYFP2_MOUSE	Cytoplasmic FMR1-interacting protein 2,Cytoplasmic FMR1-interacting protein 2,Cytoplasmic FMR1-interacting protein 2	Cyfip2,Cyfip2,Cyfip2 Kiaa1168 Pir121	ENSMUST00000142017,ENSMUST00000129474,ENSMUST00000093165 ENSMUST00000093166 ENSMUST00000165599	ENSMUSP00000119801,ENSMUSP00000116715,ENSMUSP00000090853	ENSMUSG00000020340,ENSMUSG00000020340,ENSMUSG00000020340	738.255	648.142	828.367	0.353476	0.00239038	0.0651248
ENSMUSG00000023959	chr17	44188572	44280168	+	Clic5	protein_coding	Q8BXK9 Q3U0H8	CLIC5_MOUSE	Chloride intracellular channel protein 5	Clic5	ENSMUST00000024755	ENSMUSP00000024755	ENSMUSG00000023959	11513.6	9552.43	13474.7	0.496274	0.00238557	0.0651248
ENSMUSG00000070473	chr5	134986214	134987472	+	Cldn3	protein_coding	Q9Z0G9 Q91X40	CLD3_MOUSE	Claudin-3	Cldn3 Cpetr2	ENSMUST00000094245	ENSMUSP00000091799	ENSMUSG00000070473	2413.03	2207.75	2618.3	0.245953	0.00237725	0.0651248
ENSMUSG00000021950	chr14	34085981	34100571	+	Anxa8	protein_coding	O35640 Q8K2N9,Q921D0	ANXA8_MOUSE,Q921D0_MOUSE	Annexin A8,Annexin	Anxa8 Anx8,Anxa8	ENSMUST00000022519,ENSMUST00000120077	ENSMUSP00000022519,ENSMUSP00000113662	ENSMUSG00000021950,ENSMUSG00000021950	495.862	425.457	566.267	0.411628	0.00242823	0.0657434
ENSMUSG00000055884	chr12	65075606	65132058	+	Fancm	protein_coding	Q8BGE5 Q69ZF5 Q8BKB7 Q8BUA8	FANCM_MOUSE	Fanconi anemia group M protein homolog	Fancm Kiaa1596	ENSMUST00000058889	ENSMUSP00000054797	ENSMUSG00000055884	991.39	1105.59	877.187	-0.333524	0.002427	0.0657434
ENSMUSG00000052040	chr7	63886347	63938915	-	Klf13	protein_coding	Q9DCC0,Q9JJZ6 Q9ESX3 Q9JHF8	Q9DCC0_MOUSE,KLF13_MOUSE	Krueppel-like factor 13,Krueppel-like factor 13	Klf13,Klf13 Bteb3 Fklf2	ENSMUST00000183817,ENSMUST00000063694	ENSMUSP00000139049,ENSMUSP00000067680	ENSMUSG00000052040,ENSMUSG00000052040	2474.33	2281.96	2666.7	0.224688	0.00245206	0.0662239
ENSMUSG00000027959	chr3	116594982	116631004	+	Sass6	protein_coding	Q80UK7 Q9CYT4	SAS6_MOUSE	Spindle assembly abnormal protein 6 homolog	Sass6 Sas6	ENSMUST00000029571	ENSMUSP00000029571	ENSMUSG00000027959	505.425	576.729	434.12	-0.40898	0.00246646	0.0664478
ENSMUSG00000035954	chr12	40446053	40846486	+	Dock4	protein_coding	P59764	DOCK4_MOUSE	Dedicator of cytokinesis protein 4	Dock4 Kiaa0716	ENSMUST00000037488	ENSMUSP00000047387	ENSMUSG00000035954	3045.23	3307.7	2782.76	-0.24923	0.0024748	0.066508
ENSMUSG00000010608	chr12	83631236	83683123	+	Rbm25	protein_coding	B2RY56 Q3TPH6 Q3U976 Q3UQU7 Q6NWW2 Q8BVT8 Q91XE6 Q9CT27 Q9CT49,S4R1X5,S4R1X9,S4R2A4,S4R2B0,S4R2B1,S4R2F7,S4R2J1,S4R2J4	RBM25_MOUSE,S4R1X5_MOUSE,S4R1X9_MOUSE,S4R2A4_MOUSE,S4R2B0_MOUSE,S4R2B1_MOUSE,S4R2F7_MOUSE,S4R2J1_MOUSE,S4R2J4_MOUSE	RNA-binding protein 25,RNA-binding protein 25,RNA-binding protein 25,RNA-binding protein 25,RNA-binding protein 25,RNA-binding protein 25,RNA-binding protein 25,RNA-binding protein 25,RNA-binding protein 25	Rbm25,Rbm25,Rbm25,Rbm25,Rbm25,Rbm25,Rbm25,Rbm25,Rbm25	ENSMUST00000048155,ENSMUST00000182347,ENSMUST00000182450,ENSMUST00000182036,ENSMUST00000181983,ENSMUST00000182004,ENSMUST00000182633,ENSMUST00000182618,ENSMUST00000183154	ENSMUSP00000048470,ENSMUSP00000138410,ENSMUSP00000138416,ENSMUSP00000138565,ENSMUSP00000138572,ENSMUSP00000138573,ENSMUSP00000138625,ENSMUSP00000138665,ENSMUSP00000138669	ENSMUSG00000010608,ENSMUSG00000010608,ENSMUSG00000010608,ENSMUSG00000010608,ENSMUSG00000010608,ENSMUSG00000010608,ENSMUSG00000010608,ENSMUSG00000010608,ENSMUSG00000010608	9493.93	10126	8861.81	-0.192377	0.00250467	0.0669741
ENSMUSG00000028676	chr4	135855747	135869908	+	Srsf10	protein_coding	Q3TFP0,Q9R0U0 B1AV44 B1AV45 O70307 O88468 Q3TGW7 Q8CFZ1 Q9R0T9	Q3TFP0_MOUSE,SRS10_MOUSE	Serine/arginine-rich-splicing factor 10,Serine/arginine-rich splicing factor 10	Srsf10 Fusip1 Sfrs13a Srsf13a,Srsf10 Fusip1 Nssr Sfrs13a Srsf13a	ENSMUST00000102544,ENSMUST00000097844 ENSMUST00000105853 ENSMUST00000126641	ENSMUSP00000099603,ENSMUSP00000095455	ENSMUSG00000028676,ENSMUSG00000028676	5304.59	5659.84	4949.35	-0.193485	0.00251061	0.0669741
ENSMUSG00000033960	chr18	4634929	4682868	+	9430020K01Rik	protein_coding	Q5DTX6	JCAD_MOUSE	Junctional protein associated with coronary artery disease	Jcad Gm328 Kiaa1462	ENSMUST00000037029	ENSMUSP00000038613	ENSMUSG00000033960	6500.31	6043.18	6957.43	0.203217	0.00250648	0.0669741
ENSMUSG00000042961	chr15	7206120	7398395	-	Egflam	protein_coding	E0CXM4,Q4VBE4 B2RWU6 B6JU28 Q80WX4 Q8BGP3	E0CXM4_MOUSE,EGFLA_MOUSE	Pikachurin,Pikachurin	Egflam,Egflam	ENSMUST00000160207,ENSMUST00000058593 ENSMUST00000096494	ENSMUSP00000125188,ENSMUSP00000055599	ENSMUSG00000042961,ENSMUSG00000042961	2076.67	1899.4	2253.95	0.246792	0.00251993	0.0670585
ENSMUSG00000016024	chr2	158306493	158332852	+	Lbp	protein_coding	A2AC65,F6XKX9,Q61805 A2AC66 Q99KA0	A2AC65_MOUSE,F6XKX9_MOUSE,LBP_MOUSE	Lipopolysaccharide-binding protein,Lipopolysaccharide-binding protein,Lipopolysaccharide-binding protein	Lbp,Lbp,Lbp	ENSMUST00000109491,ENSMUST00000129811,ENSMUST00000016168	ENSMUSP00000105117,ENSMUSP00000118297,ENSMUSP00000016168	ENSMUSG00000016024,ENSMUSG00000016024,ENSMUSG00000016024	485.817	418.904	552.73	0.399124	0.00255415	0.0678032
ENSMUSG00000012428	chr5	7960457	7982213	+	Steap4	protein_coding	Q923B6 Q91W31 Q91ZE8	STEA4_MOUSE	Metalloreductase STEAP4	Steap4 Tiarp	ENSMUST00000115421	ENSMUSP00000111081	ENSMUSG00000012428	259.994	212.212	307.777	0.534282	0.00257411	0.0678367
ENSMUSG00000018339	chr11	54902453	54910377	+	Gpx3	protein_coding	D3Z2Y7,D3Z7Y0,P46412 Q5XKR0	D3Z2Y7_MOUSE,D3Z7Y0_MOUSE,GPX3_MOUSE	Glutathione peroxidase,Glutathione peroxidase,Glutathione peroxidase 3	Gpx3,Gpx3,Gpx3	ENSMUST00000125094,ENSMUST00000149324,ENSMUST00000082430	ENSMUSP00000119165,ENSMUSP00000119882,ENSMUSP00000081011	ENSMUSG00000018339,ENSMUSG00000018339,ENSMUSG00000018339	2542.12	2314.21	2770.03	0.259282	0.00256777	0.0678367
ENSMUSG00000018849	chr11	35838400	35980527	-	Wwc1	protein_coding	Q5SXA9 Q571D0 Q8K1Y3 Q8VD17 Q922W3	KIBRA_MOUSE	Protein KIBRA	Wwc1 Kiaa0869	ENSMUST00000018993	ENSMUSP00000018993	ENSMUSG00000018849	3617.34	3350.68	3884.01	0.213036	0.00257283	0.0678367
ENSMUSG00000024610	chr18	60803848	60812646	+	Cd74	protein_coding	P04441 O19452	HG2A_MOUSE	H-2 class II histocompatibility antigen gamma chain	Cd74 Ii	ENSMUST00000050487 ENSMUST00000097563 ENSMUST00000167610	ENSMUSP00000057836	ENSMUSG00000024610	435.004	371.71	498.297	0.421846	0.00260949	0.0686031
ENSMUSG00000031029	chr7	108934417	108942951	+	Eif3f	protein_coding	Q9DCH4 Q5XJV3	EIF3F_MOUSE	Eukaryotic translation initiation factor 3 subunit F	Eif3f Eif3s5	ENSMUST00000033342	ENSMUSP00000033342	ENSMUSG00000031029	6014.96	5566.91	6463.01	0.215292	0.00263287	0.0690082
ENSMUSG00000044217	chr15	99590849	99594829	+	Aqp5	protein_coding	Q9WTY4 Q545H1	AQP5_MOUSE	Aquaporin-5	Aqp5	ENSMUST00000088200 ENSMUST00000169082	ENSMUSP00000085530	ENSMUSG00000044217	501.166	297.299	705.034	1.24298	0.00263758	0.0690082
ENSMUSG00000014846	chr8	105467493	105471526	-	Tppp3	protein_coding	Q9CRB6 Q3TUZ0	TPPP3_MOUSE	Tubulin polymerization-promoting protein family member 3	Tppp3	ENSMUST00000014990 ENSMUST00000176419 ENSMUST00000177126	ENSMUSP00000014990	ENSMUSG00000014846	1374.63	1244.34	1504.92	0.274108	0.00267166	0.0697321
ENSMUSG00000021238	chr12	84430723	84450950	-	Aldh6a1	protein_coding	Q9EQ20 Q3TDA2 Q8CIB4	MMSA_MOUSE	Methylmalonate-semialdehyde dehydrogenase [acylating], mitochondrial	Aldh6a1	ENSMUST00000085192	ENSMUSP00000082288	ENSMUSG00000021238	2715.31	2503.41	2927.21	0.225546	0.00270998	0.0705631
ENSMUSG00000030157	chr6	129180615	129186534	+	Clec2d	protein_coding	Q91V08 Q1AFZ3 Q8VI19 Q8VI20	CLC2D_MOUSE	C-type lectin domain family 2 member D	Clec2d Clrb Ocil	ENSMUST00000032260	ENSMUSP00000032260	ENSMUSG00000030157	1614.37	1440.15	1788.59	0.312415	0.00274398	0.071278
ENSMUSG00000048485	chr4	129425765	129440853	-	Zbtb8b	protein_coding	I7HLR7,Q8CII0 Q3US18	I7HLR7_MOUSE,ZBT8B_MOUSE	Zinc finger and BTB domain-containing protein 8B,Zinc finger and BTB domain-containing protein 8B	Zbtb8b,Zbtb8b	ENSMUST00000106046,ENSMUST00000053042	ENSMUSP00000101661,ENSMUSP00000058157	ENSMUSG00000048485,ENSMUSG00000048485	329.263	267.692	390.834	0.544286	0.00277483	0.0719077
ENSMUSG00000017550	chr11	80089400	80135794	+	Atad5	protein_coding	Q4QY64 Q3TMG5 Q3UW85 Q3V306 Q3V3T9 Q5SSK4 Q8BUH4 Q8CGG7	ATAD5_MOUSE	ATPase family AAA domain-containing protein 5	Atad5 Frag1	ENSMUST00000017694	ENSMUSP00000017694	ENSMUSG00000017550	1341.97	1478.3	1205.63	-0.29394	0.00280407	0.0723211
ENSMUSG00000055737	chr15	3317760	3583492	-	Ghr	protein_coding	E0CXS6,P16882 P16590 Q61653 Q6DI66 Q80W86 Q8R1M5 Q920Z3 Q9R264,Q3UP14	E0CXS6_MOUSE,GHR_MOUSE,Q3UP14_MOUSE	Growth hormone receptor,Growth hormone receptor,Growth hormone receptor	Ghr,Ghr,Ghr mCG_141048	ENSMUST00000161770,ENSMUST00000110697 ENSMUST00000110698,ENSMUST00000069451 ENSMUST00000161561	ENSMUSP00000125044,ENSMUSP00000106325,ENSMUSP00000069457	ENSMUSG00000055737,ENSMUSG00000055737,ENSMUSG00000055737	5232.21	5591.38	4873.04	-0.198343	0.00280054	0.0723211
ENSMUSG00000030249	chr6	142587862	142702274	-	Abcc9	protein_coding	E9PUE8,P70170 O08902 O08920 P70171	E9PUE8_MOUSE,ABCC9_MOUSE	ATP-binding cassette sub-family C member 9,ATP-binding cassette sub-family C member 9	Abcc9,Abcc9 Sur2	ENSMUST00000111771,ENSMUST00000073173 ENSMUST00000087527 ENSMUST00000100827	ENSMUSP00000107401,ENSMUSP00000072914	ENSMUSG00000030249,ENSMUSG00000030249	1030.43	923.936	1136.91	0.298967	0.00282283	0.0726329
ENSMUSG00000021377	chr13	47084775	47106201	-	Dek	protein_coding	D3YVJ6,E9Q8Y1,Q7TNV0 Q80VC5 Q8BZV6	D3YVJ6_MOUSE,E9Q8Y1_MOUSE,DEK_MOUSE	Protein DEK,Protein DEK,Protein DEK	Dek,Dek,Dek	ENSMUST00000129352,ENSMUST00000135278,ENSMUST00000021807	ENSMUSP00000114392,ENSMUSP00000121663,ENSMUSP00000021807	ENSMUSG00000021377,ENSMUSG00000021377,ENSMUSG00000021377	6124.56	6523.11	5726.01	-0.187998	0.00284701	0.0730823
ENSMUSG00000025407	chr10	127329889	127341589	-	Gli1	protein_coding	P47806 G5E857 Q9QYK1	GLI1_MOUSE	Zinc finger protein GLI1	Gli1 Gli	ENSMUST00000026474	ENSMUSP00000026474	ENSMUSG00000025407	2444.99	2636.62	2253.35	-0.226523	0.00287264	0.073405
ENSMUSG00000031200	chrX	75410444	75416588	-	Mtcp1	protein_coding	Q60945 A3KGA7	MTCP1_MOUSE	Protein p13 MTCP-1	Mtcp1 C6,1b	ENSMUST00000033542 ENSMUST00000114081	ENSMUSP00000033542	ENSMUSG00000031200	981.436	1088.19	874.686	-0.314766	0.00287307	0.073405
ENSMUSG00000024653	chr19	9083636	9087958	-	Scgb1a1	protein_coding	Q06318	UTER_MOUSE	Uteroglobin	Scgb1a1 Cc10 Ugb Utg	ENSMUST00000025554	ENSMUSP00000025554	ENSMUSG00000024653	966.562	540.762	1392.36	1.36284	0.00288864	0.0735261
ENSMUSG00000030682	chr7	126976349	126980499	+	Cdipt	protein_coding	Q8VDP6	CDIPT_MOUSE	CDP-diacylglycerol--inositol 3-phosphatidyltransferase	Cdipt Pis1	ENSMUST00000032920	ENSMUSP00000032920	ENSMUSG00000030682	1921.63	1753.56	2089.7	0.252878	0.00289132	0.0735261
ENSMUSG00000027954	chr3	89271733	89281142	-	Efna1	protein_coding	D3YTT5,D3Z7A6,P52793 P97331	D3YTT5_MOUSE,D3Z7A6_MOUSE,EFNA1_MOUSE	Ephrin-A1,Ephrin-A1,Ephrin-A1	Efna1,Efna1,Efna1 Epgl1 Epl1 Lerk1	ENSMUST00000118587,ENSMUST00000118860,ENSMUST00000029566	ENSMUSP00000112904,ENSMUSP00000113098,ENSMUSP00000029566	ENSMUSG00000027954,ENSMUSG00000027954,ENSMUSG00000027954	2388.33	2156.97	2619.69	0.280269	0.00299905	0.0760879
ENSMUSG00000066551	chr5	149046702	149184489	-	Hmgb1	protein_coding	D3YVC6,D3YZ18,P63158 P07155 P27109 P27428	D3YVC6_MOUSE,D3YZ18_MOUSE,HMGB1_MOUSE	High mobility group protein B1,High mobility group protein B1,High mobility group protein B1	Hmgb1,Hmgb1,Hmgb1 Hmg-1 Hmg1	ENSMUST00000125605,ENSMUST00000138553,ENSMUST00000085546 ENSMUST00000093196 ENSMUST00000110505	ENSMUSP00000114515,ENSMUSP00000118733,ENSMUSP00000082682	ENSMUSG00000066551,ENSMUSG00000066551,ENSMUSG00000066551	6059.3	6484.96	5633.64	-0.202998	0.0030408	0.0769675
ENSMUSG00000038650	chr7	141160328	141172851	-	Rnh1	protein_coding	Q91VI7 Q924P4	RINI_MOUSE	Ribonuclease inhibitor	Rnh1 Rnh	ENSMUST00000106033 ENSMUST00000167493	ENSMUSP00000101651	ENSMUSG00000038650	3107.41	2836.47	3378.35	0.252144	0.00306095	0.0772979
ENSMUSG00000026728	chr2	13573927	13582826	+	Vim	protein_coding	A2AKJ2,P20152 O08704 Q8CCH1	A2AKJ2_MOUSE,VIME_MOUSE	Vimentin,Vimentin	Vim,Vim	ENSMUST00000141365,ENSMUST00000028062	ENSMUSP00000114742,ENSMUSP00000028062	ENSMUSG00000026728,ENSMUSG00000026728	22378.5	21167	23589.9	0.156344	0.00317527	0.0794475
ENSMUSG00000039865	chr3	121459528	121532404	-	Slc44a3	protein_coding	Q921V7 G5E8A3	CTL3_MOUSE	Choline transporter-like protein 3	Slc44a3 Ctl3	ENSMUST00000039197	ENSMUSP00000040210	ENSMUSG00000039865	809.832	719.328	900.336	0.32341	0.00317415	0.0794475
ENSMUSG00000046179	chr7	48866429	48881596	-	E2f8	protein_coding	Q58FA4 Q3U4W2 Q497V7 Q5PRE4 Q8BQJ5 Q8C3Y5	E2F8_MOUSE	Transcription factor E2F8	E2f8	ENSMUST00000058745 ENSMUST00000119223	ENSMUSP00000056778	ENSMUSG00000046179	767.753	857.542	677.963	-0.338555	0.00316109	0.0794475
ENSMUSG00000052459	chr16	44085402	44139705	-	Atp6v1a	protein_coding	D3YWH3,D3YZ23,D3Z1B9,P50516 Q3TKS0 Q3U5W3 Q3U777 Q3UDZ9 Q3US31 Q8CHX2	D3YWH3_MOUSE,D3YZ23_MOUSE,D3Z1B9_MOUSE,VATA_MOUSE	V-type proton ATPase catalytic subunit A,V-type proton ATPase catalytic subunit A,V-type proton ATPase catalytic subunit A,V-type proton ATPase catalytic subunit A	Atp6v1a,Atp6v1a,Atp6v1a,Atp6v1a Atp6a1 Atp6a2 Atp6v1a1	ENSMUST00000124102,ENSMUST00000147025,ENSMUST00000137557,ENSMUST00000063661 ENSMUST00000114666	ENSMUSP00000118429,ENSMUSP00000118726,ENSMUSP00000116923,ENSMUSP00000066886	ENSMUSG00000052459,ENSMUSG00000052459,ENSMUSG00000052459,ENSMUSG00000052459	4035.64	3763.85	4307.44	0.194575	0.00315455	0.0794475
ENSMUSG00000020914	chr11	98992943	99024189	-	Top2a	protein_coding	Q01320 E9PX08	TOP2A_MOUSE	DNA topoisomerase 2-alpha	Top2a Top-2 Top2	ENSMUST00000068031	ENSMUSP00000068896	ENSMUSG00000020914	12330.2	13110.3	11550.1	-0.182788	0.00319419	0.0797374
ENSMUSG00000017723	chr2	164562413	164568510	+	Wfdc2	protein_coding	A2A5G4,A2A5G5,A2A5G6,Q9DAU7	A2A5G4_MOUSE,A2A5G5_MOUSE,A2A5G6_MOUSE,WFDC2_MOUSE	WAP four-disulfide core domain protein 2,WAP four-disulfide core domain protein 2,WAP four-disulfide core domain protein 2,WAP four-disulfide core domain protein 2	Wfdc2,Wfdc2,Wfdc2,Wfdc2 He4	ENSMUST00000109344,ENSMUST00000109345,ENSMUST00000125051,ENSMUST00000017867	ENSMUSP00000104968,ENSMUSP00000104969,ENSMUSP00000119391,ENSMUSP00000017867	ENSMUSG00000017723,ENSMUSG00000017723,ENSMUSG00000017723,ENSMUSG00000017723	5217.01	4805.76	5628.26	0.227879	0.00321366	0.0799157
ENSMUSG00000037608	chr10	20312469	20344613	+	Bclaf1	protein_coding	F8WI22,Q8K019 Q8BNZ0 Q8C2E9 Q9CSW5	F8WI22_MOUSE,BCLF1_MOUSE	Bcl-2-associated transcription factor 1,Bcl-2-associated transcription factor 1	Bclaf1,Bclaf1 Btf Kiaa0164	ENSMUST00000092678,ENSMUST00000043881	ENSMUSP00000090349,ENSMUSP00000043583	ENSMUSG00000037608,ENSMUSG00000037608	8916.9	9485.79	8348.02	-0.184314	0.00321601	0.0799157
ENSMUSG00000066057	chr17	94759944	94834799	-	Gm1976	lincRNA								362.5	419.069	305.931	-0.452709	0.00325497	0.0806995
ENSMUSG00000046111	chr9	15316915	15357788	-	Cep295	protein_coding	E9QPW4,F6URK1,F6V9M5,F7BWD7,Q8BQ48 Q0VF60 Q3UYP6 Q571B9 Q8CCJ2 Q8CDA9	E9QPW4_MOUSE,F6URK1_MOUSE,F6V9M5_MOUSE,F7BWD7_MOUSE,K1731_MOUSE	Protein 5830418K08Rik,Protein 5830418K08Rik,Protein 5830418K08Rik,Protein 5830418K08Rik,Centrosomal protein KIAA1731 homolog	5830418K08Rik,5830418K08Rik,5830418K08Rik,5830418K08Rik,Kiaa1731	ENSMUST00000098979,ENSMUST00000159156,ENSMUST00000162264,ENSMUST00000160946,ENSMUST00000161132 ENSMUST00000161795	ENSMUSP00000096578,ENSMUSP00000123950,ENSMUSP00000123748,ENSMUSP00000125494,ENSMUSP00000123788	ENSMUSG00000046111,ENSMUSG00000046111,ENSMUSG00000046111,ENSMUSG00000046111,ENSMUSG00000046111	2028.13	2206.17	1850.08	-0.253834	0.00327709	0.0810633
ENSMUSG00000020330	chr11	40701395	40733422	-	Hmmr	protein_coding	Q00547 Q5NC88	HMMR_MOUSE	Hyaluronan mediated motility receptor	Hmmr Ihabp Rhamm	ENSMUST00000020579	ENSMUSP00000020579	ENSMUSG00000020330	2138.66	2311.58	1965.74	-0.233699	0.00332495	0.0816759
ENSMUSG00000031075	chr7	144588549	144751974	-	Ano1	protein_coding	D3YYA4,D3Z035,F6R6E1,G8JL82,Q8BHY3 Q6P5C6 Q8BI26 Q99JK1	D3YYA4_MOUSE,D3Z035_MOUSE,F6R6E1_MOUSE,G8JL82_MOUSE,ANO1_MOUSE	Anoctamin-1,Anoctamin-1,Anoctamin,Anoctamin,Anoctamin-1	Ano1,Ano1,Ano1,Ano1,Ano1 Tmem16a	ENSMUST00000131731,ENSMUST00000155175,ENSMUST00000152531,ENSMUST00000118556,ENSMUST00000033393 ENSMUST00000121758	ENSMUSP00000118206,ENSMUSP00000120306,ENSMUSP00000119653,ENSMUSP00000113899,ENSMUSP00000033393	ENSMUSG00000031075,ENSMUSG00000031075,ENSMUSG00000031075,ENSMUSG00000031075,ENSMUSG00000031075	4937.09	4593.62	5280.55	0.201018	0.00331905	0.0816759
ENSMUSG00000032555	chr9	103305215	103350428	+	Topbp1	protein_coding	Q6ZQF0 Q6P6P0 Q80Y33 Q8BUI0 Q8BUK1 Q8R348 Q91VX3 Q922X8	TOPB1_MOUSE	DNA topoisomerase 2-binding protein 1	Topbp1 Kiaa0259	ENSMUST00000035164	ENSMUSP00000035164	ENSMUSG00000032555	4586.32	4892.21	4280.43	-0.192687	0.00332055	0.0816759
ENSMUSG00000053062	chr16	84774123	84825928	+	Jam2	protein_coding	Q9CWD9,Q9JI59 A6X955 Q8C5K9 Q8CE95	Q9CWD9_MOUSE,JAM2_MOUSE	Junctional adhesion molecule B,Junctional adhesion molecule B	Jam2,Jam2 Vejam	ENSMUST00000098407,ENSMUST00000114195	ENSMUSP00000096007,ENSMUSP00000109833	ENSMUSG00000053062,ENSMUSG00000053062	1183.33	1055.94	1310.72	0.311559	0.00333187	0.0816759
ENSMUSG00000030701	chr7	100642892	100662414	-	Plekhb1	protein_coding	D3YV71,D3YZT7,D3Z1E2,D3Z6S5,Q9QYE9 Q9QYB3 Q9QYB4 Q9QYD2 Q9QYD3	D3YV71_MOUSE,D3YZT7_MOUSE,D3Z1E2_MOUSE,D3Z6S5_MOUSE,PKHB1_MOUSE	Pleckstrin homology domain-containing family B member 1,Pleckstrin homology domain-containing family B member 1,Pleckstrin homology domain-containing family B member 1,Pleckstrin homology domain-containing family B member 1,Pleckstrin homology domain-containing family B member 1	Plekhb1,Plekhb1,Plekhb1,Plekhb1,Plekhb1 Evt1 Phr1	ENSMUST00000107043,ENSMUST00000151123,ENSMUST00000138830,ENSMUST00000139708,ENSMUST00000079176 ENSMUST00000107044 ENSMUST00000107045 ENSMUST00000107046 ENSMUST00000107047 ENSMUST00000116287	ENSMUSP00000102658,ENSMUSP00000115559,ENSMUSP00000116888,ENSMUSP00000122333,ENSMUSP00000078175	ENSMUSG00000030701,ENSMUSG00000030701,ENSMUSG00000030701,ENSMUSG00000030701,ENSMUSG00000030701	779.159	688.262	870.055	0.337711	0.00336193	0.0822275
ENSMUSG00000056531	chr5	108132875	108233628	+	Ccdc18	protein_coding	Q640L5 Q8BIM9 Q8BIN1 Q9DA43	CCD18_MOUSE	Coiled-coil domain-containing protein 18	Ccdc18	ENSMUST00000047677	ENSMUSP00000036507	ENSMUSG00000056531	828.821	931.521	726.121	-0.358941	0.00342699	0.0836309
ENSMUSG00000028121	chr3	122294136	122530191	+	Bcar3	protein_coding	Q9QZK2 Q3TNC9 Q3UP10	BCAR3_MOUSE	Breast cancer anti-estrogen resistance protein 3	Bcar3 And34	ENSMUST00000029766	ENSMUSP00000029766	ENSMUSG00000028121	682.733	601.716	763.75	0.343511	0.00344409	0.0838601
ENSMUSG00000021025	chr12	55489411	55492647	-	Nfkbia	protein_coding	Q9Z1E3 Q3U9W9 Q3UB40 Q80ZX5	IKBA_MOUSE	NF-kappa-B inhibitor alpha	Nfkbia Ikba	ENSMUST00000021413	ENSMUSP00000021413	ENSMUSG00000021025	1784.29	1627.87	1940.7	0.253445	0.00345847	0.0840224
ENSMUSG00000048271	chr5	28317121	28419239	+	Rbm33	protein_coding	D3YV48,D3Z5I9,F6RNF9,F6Y0Q7,Q9CXK9 Q3U5Z3 Q8C5J6	D3YV48_MOUSE,D3Z5I9_MOUSE,F6RNF9_MOUSE,F6Y0Q7_MOUSE,RBM33_MOUSE	RNA-binding protein 33,RNA-binding protein 33,RNA-binding protein 33,RNA-binding protein 33,RNA-binding protein 33	Rbm33,Rbm33,Rbm33,Rbm33,Rbm33 Prr8	ENSMUST00000090355,ENSMUST00000114884,ENSMUST00000144967,ENSMUST00000133313,ENSMUST00000030920 ENSMUST00000059644	ENSMUSP00000091512,ENSMUSP00000110534,ENSMUSP00000121879,ENSMUSP00000122901,ENSMUSP00000030920	ENSMUSG00000048271,ENSMUSG00000048271,ENSMUSG00000048271,ENSMUSG00000048271,ENSMUSG00000048271	5204.79	5610.48	4799.1	-0.225318	0.00347739	0.0842937
ENSMUSG00000038252	chr6	125168007	125191701	-	Ncapd2	protein_coding	Q8K2Z4 Q6ZQI1 Q8R0F2 Q8R3H0 Q922B7 Q923A3 Q9CS25 Q9CT32	CND1_MOUSE	Condensin complex subunit 1	Ncapd2 Capd2 Cnap1 Kiaa0159	ENSMUST00000043848	ENSMUSP00000042260	ENSMUSG00000038252	4918.38	5246.22	4590.53	-0.192576	0.00349691	0.0845787
ENSMUSG00000025509	chr7	141455198	141460743	+	Pnpla2	protein_coding	E9PZA4,E9Q144,E9Q323,H3BIT5,Q8BJ56 O89080 Q05BJ0 Q3UD97 Q643S0 Q6P234 Q9D1Q9 Q9DCF6	E9PZA4_MOUSE,E9Q144_MOUSE,E9Q323_MOUSE,H3BIT5_MOUSE,PLPL2_MOUSE	Patatin-like phospholipase domain-containing protein 2,Patatin-like phospholipase domain-containing protein 2,Patatin-like phospholipase domain-containing protein 2,Patatin-like phospholipase domain-containing protein 2,Patatin-like phospholipase domain-containing protein 2	Pnpla2,Pnpla2,Pnpla2,Pnpla2,Pnpla2 Atgl	ENSMUST00000169665,ENSMUST00000169723,ENSMUST00000165487,ENSMUST00000026583 ENSMUST00000164924,ENSMUST00000064151 ENSMUST00000164016	ENSMUSP00000127983,ENSMUSP00000126098,ENSMUSP00000132038,ENSMUSP00000026583,ENSMUSP00000065116	ENSMUSG00000025509,ENSMUSG00000025509,ENSMUSG00000025509,ENSMUSG00000025509,ENSMUSG00000025509	743.895	659.983	827.808	0.326425	0.00352685	0.0851136
ENSMUSG00000055436	chr3	158010473	158036639	-	Srsf11	protein_coding	B7ZNC5,D3Z4B0,D6RE22,E9Q6E5,F6TN80,F6X2U6,F6XR65,Q3UIX4,Q8BV04	B7ZNC5_MOUSE,D3Z4B0_MOUSE,D6RE22_MOUSE,E9Q6E5_MOUSE,F6TN80_MOUSE,F6X2U6_MOUSE,F6XR65_MOUSE,Q3UIX4_MOUSE,Q8BV04_MOUSE	Protein Srsf11 Sfrs11 protein,Protein Srsf11,Protein Srsf11,Protein Srsf11,Protein Srsf11,Protein Srsf11,Protein Srsf11,Protein Srsf11 Splicing factor, arginine/serine-rich 11, isoform CRA_b,Protein Srsf11 Splicing factor, arginine/serine-rich 11	Srsf11 Sfrs11,Srsf11,Srsf11,Srsf11,Srsf11,Srsf11,Srsf11,Srsf11 Sfrs11 mCG_11658,Srsf11 Sfrs11	ENSMUST00000069025,ENSMUST00000137444,ENSMUST00000126716,ENSMUST00000121326,ENSMUST00000147304,ENSMUST00000140491,ENSMUST00000127778,ENSMUST00000072875,ENSMUST00000152274	ENSMUSP00000063916,ENSMUSP00000122686,ENSMUSP00000114370,ENSMUSP00000113685,ENSMUSP00000115487,ENSMUSP00000118767,ENSMUSP00000118652,ENSMUSP00000072651,ENSMUSP00000127239	ENSMUSG00000055436,ENSMUSG00000055436,ENSMUSG00000055436,ENSMUSG00000055436,ENSMUSG00000055436,ENSMUSG00000055436,ENSMUSG00000055436,ENSMUSG00000055436,ENSMUSG00000055436	10979.6	11604.9	10354.4	-0.164475	0.00357625	0.0861149
ENSMUSG00000040865	chr1	62958418	63114667	-	Ino80d	protein_coding	B1AT32,B1AT33,B1AT34,E9Q9Q0	B1AT32_MOUSE,B1AT33_MOUSE,B1AT34_MOUSE,E9Q9Q0_MOUSE	INO80 complex subunit D,INO80 complex subunit D,INO80 complex subunit D,INO80 complex subunit D	Ino80d,Ino80d,Ino80d,Ino80d	ENSMUST00000097718 ENSMUST00000133236 ENSMUST00000172416,ENSMUST00000137511,ENSMUST00000153992,ENSMUST00000165066	ENSMUSP00000095325,ENSMUSP00000119118,ENSMUSP00000115332,ENSMUSP00000130864	ENSMUSG00000040865,ENSMUSG00000040865,ENSMUSG00000040865,ENSMUSG00000040865	3614.8	3918	3311.6	-0.242523	0.00365984	0.0879332
ENSMUSG00000028063	chr3	88480147	88509956	-	Lmna	protein_coding	D3YUF7,P48678 B3RH23 B3RH24 P11516 P97859 Q3TIH0 Q3TTS8 Q3U733 Q3U7I5 Q3UCA0 Q3UCJ8 Q3UCU3 Q91WF2 Q9DC21	D3YUF7_MOUSE,LMNA_MOUSE	Prelamin-A/C,Prelamin-A/C	Lmna,Lmna Lmn1	ENSMUST00000149068,ENSMUST00000029699 ENSMUST00000036252 ENSMUST00000120377	ENSMUSP00000120784,ENSMUSP00000029699	ENSMUSG00000028063,ENSMUSG00000028063	2561.59	2358.67	2764.52	0.228962	0.0036733	0.0879661
ENSMUSG00000046794	chr8	35375741	35388124	+	Ppp1r3b	protein_coding	Q8C767 Q6PAJ7	PPR3B_MOUSE	Protein phosphatase 1 regulatory subunit 3B	Ppp1r3b Ppp1r4	ENSMUST00000070481	ENSMUSP00000065679	ENSMUSG00000046794	7009.83	6580.63	7439.03	0.176864	0.00367738	0.0879661
ENSMUSG00000000948	chr7	59974149	60005064	-	Gm38393	protein_coding	P63163 P14648 P17135	RSMN_MOUSE	Small nuclear ribonucleoprotein-associated protein N	Snrpn Smn	ENSMUST00000059305 ENSMUST00000098402	ENSMUSP00000055941	ENSMUSG00000000948	289.655	344.734	234.576	-0.553471	0.00369137	0.0881072
ENSMUSG00000031099	chrX	47809368	47892974	-	Smarca1	protein_coding	F6QS43,F6Z6F4,Q6PGB8 B1AUP6 B1AUP7 Q8BSS1 Q91Y58,Q8BS67	F6QS43_MOUSE,F6Z6F4_MOUSE,SMCA1_MOUSE,Q8BS67_MOUSE	Probable global transcription activator SNF2L1,Probable global transcription activator SNF2L1,Probable global transcription activator SNF2L1,Probable global transcription activator SNF2L1	Smarca1,Smarca1,Smarca1 Snf2l,Smarca1	ENSMUST00000153587,ENSMUST00000153548,ENSMUST00000077569 ENSMUST00000088973 ENSMUST00000101616,ENSMUST00000141084	ENSMUSP00000116209,ENSMUSP00000114296,ENSMUSP00000076769,ENSMUSP00000135570	ENSMUSG00000031099,ENSMUSG00000031099,ENSMUSG00000031099,ENSMUSG00000031099	2369.51	2565.29	2173.73	-0.238849	0.00370104	0.0881447
ENSMUSG00000020057	chr10	88322804	88379080	-	Dram1	protein_coding	D3Z5R7,D6RJL8,Q9DC58 Q78J26	D3Z5R7_MOUSE,D6RJL8_MOUSE,DRAM1_MOUSE	DNA damage-regulated autophagy modulator protein 1,DNA damage-regulated autophagy modulator protein 1,DNA damage-regulated autophagy modulator protein 1	Dram1,Dram1,Dram1 Dram	ENSMUST00000138159,ENSMUST00000156097,ENSMUST00000020249	ENSMUSP00000116312,ENSMUSP00000123685,ENSMUSP00000020249	ENSMUSG00000020057,ENSMUSG00000020057,ENSMUSG00000020057	7672.16	7182.02	8162.29	0.18456	0.00381643	0.0899578
ENSMUSG00000026890	chr2	36081953	36105408	-	Lhx6	protein_coding	E9QN32,H3BLG4,H9H9T0,Q9R1R0 O88706 Q6P1H2 Q9R1R1	E9QN32_MOUSE,H3BLG4_MOUSE,H9H9T0_MOUSE,LHX6_MOUSE	LIM/homeobox protein Lhx6,LIM/homeobox protein Lhx6,LIM/homeobox protein Lhx6,LIM/homeobox protein Lhx6	Lhx6,Lhx6,Lhx6,Lhx6 Lhx6,1	ENSMUST00000112967,ENSMUST00000136821,ENSMUST00000112960,ENSMUST00000112961 ENSMUST00000112963 ENSMUST00000112966	ENSMUSP00000108591,ENSMUSP00000135776,ENSMUSP00000108584,ENSMUSP00000108585	ENSMUSG00000026890,ENSMUSG00000026890,ENSMUSG00000026890,ENSMUSG00000026890	359.162	414.797	303.526	-0.449314	0.00381373	0.0899578
ENSMUSG00000031447	chr8	13159135	13175338	+	Lamp1	protein_coding	P11438 Q62020	LAMP1_MOUSE	Lysosome-associated membrane glycoprotein 1	Lamp1 Lamp-1	ENSMUST00000033824	ENSMUSP00000033824	ENSMUSG00000031447	9049.93	8466.66	9633.21	0.186203	0.0038123	0.0899578
ENSMUSG00000034994	chr10	81176631	81182507	+	Eef2	protein_coding	P58252 Q544E4	EF2_MOUSE	Elongation factor 2	Eef2	ENSMUST00000047864	ENSMUSP00000046101	ENSMUSG00000034994	72836.7	68978.2	76695.2	0.152993	0.00380256	0.0899578
ENSMUSG00000071637	chr16	15887286	15888466	+	Cebpd	pseudogene								746.799	643.144	850.453	0.402545	0.0038185	0.0899578
ENSMUSG00000019850	chr10	19000910	19015657	-	Tnfaip3	protein_coding	D3YXE1,D3Z5R6,Q60769 Q3U968	D3YXE1_MOUSE,D3Z5R6_MOUSE,TNAP3_MOUSE	Tumor necrosis factor alpha-induced protein 3,Tumor necrosis factor alpha-induced protein 3,Tumor necrosis factor alpha-induced protein 3	Tnfaip3,Tnfaip3,Tnfaip3 Tnfip3	ENSMUST00000146388,ENSMUST00000122863,ENSMUST00000019997 ENSMUST00000105527	ENSMUSP00000120627,ENSMUSP00000116318,ENSMUSP00000019997	ENSMUSG00000019850,ENSMUSG00000019850,ENSMUSG00000019850	370.083	313.148	427.019	0.446232	0.00385845	0.0906132
ENSMUSG00000032816	chr9	65101486	65137940	+	Igdcc4	protein_coding	A0JNS2,E9QAQ0,Q9EQS9 Q80TB0 Q9EQS8 Q9JLI1	A0JNS2_MOUSE,E9QAQ0_MOUSE,IGDC4_MOUSE	Igdcc4 protein Immunoglobulin superfamily DCC subclass member 4,Immunoglobulin superfamily DCC subclass member 4,Immunoglobulin superfamily DCC subclass member 4	Igdcc4 Nope,Igdcc4,Igdcc4 Ddm36 Kiaa1628 Nope	ENSMUST00000166273,ENSMUST00000077696,ENSMUST00000035499	ENSMUSP00000132576,ENSMUSP00000076878,ENSMUSP00000045387	ENSMUSG00000032816,ENSMUSG00000032816,ENSMUSG00000032816	991.213	1095.96	886.468	-0.30574	0.00386297	0.0906132
ENSMUSG00000030717	chr7	126623249	126630861	-	Nupr1	protein_coding	Q9WTK0 Q9D756	NUPR1_MOUSE	Nuclear protein 1	Nupr1	ENSMUST00000032961	ENSMUSP00000032961	ENSMUSG00000030717	688.407	593.131	783.684	0.40133	0.0038876	0.0909949
ENSMUSG00000055945	chr17	8340406	8344112	+	Prr18	protein_coding	Q6PAN7 Q8BR84 Q8CA32 Q8CBI5	PRR18_MOUSE	Proline-rich protein 18	Prr18	ENSMUST00000069742 ENSMUST00000163887	ENSMUSP00000069019	ENSMUSG00000055945	456.301	387.378	525.225	0.438218	0.00393559	0.0919206
ENSMUSG00000051790	chr11	69823122	69837784	-	Nlgn2	protein_coding	F6VE93,Q69ZK9 Q5F288	F6VE93_MOUSE,NLGN2_MOUSE	Neuroligin-2,Neuroligin-2	Nlgn2,Nlgn2 Kiaa1366	ENSMUST00000139893,ENSMUST00000056484 ENSMUST00000108634	ENSMUSP00000120428,ENSMUSP00000053097	ENSMUSG00000051790,ENSMUSG00000051790	2772.22	2982.21	2562.23	-0.218899	0.00398525	0.0928811
ENSMUSG00000029208	chr5	69556923	69575973	+	Guf1	protein_coding	F6ZM03,G3UWY0,Q8C3X4 Q6PEN7 Q8BPS6	F6ZM03_MOUSE,G3UWY0_MOUSE,GUF1_MOUSE	Translation factor Guf1, mitochondrial,Translation factor Guf1, mitochondrial,Translation factor Guf1, mitochondrial	Guf1,Guf1,Guf1	ENSMUST00000144363,ENSMUST00000173205,ENSMUST00000031113 ENSMUST00000087228	ENSMUSP00000114707,ENSMUSP00000133467,ENSMUSP00000031113	ENSMUSG00000029208,ENSMUSG00000029208,ENSMUSG00000029208	2445.46	2635.17	2255.74	-0.224202	0.00400045	0.0930361
ENSMUSG00000021714	chr13	104228955	104249615	+	Cenpk	protein_coding	Q9ESN5 Q3UXA9 Q569Q3 Q8C469	CENPK_MOUSE	Centromere protein K	Cenpk Solt	ENSMUST00000022227 ENSMUST00000070761	ENSMUSP00000022227	ENSMUSG00000021714	529.48	597.005	461.955	-0.369285	0.00403181	0.0931681
ENSMUSG00000035234	chr5	100805192	100820965	-	Fam175a	protein_coding	D6RFD4,D6RHB0,Q8BPZ8 Q3TJ88 Q8BFV6 Q8BT69 Q8K2T7	D6RFD4_MOUSE,D6RHB0_MOUSE,F175A_MOUSE	BRCA1-A complex subunit Abraxas,BRCA1-A complex subunit Abraxas,BRCA1-A complex subunit Abraxas	Fam175a,Fam175a,Fam175a Abra1 Ccdc98	ENSMUST00000129358,ENSMUST00000153302,ENSMUST00000044535 ENSMUST00000055245 ENSMUST00000117364	ENSMUSP00000117012,ENSMUSP00000116476,ENSMUSP00000047692	ENSMUSG00000035234,ENSMUSG00000035234,ENSMUSG00000035234	529.903	602.752	457.053	-0.39844	0.00402695	0.0931681
ENSMUSG00000038047	chr4	86578855	86612055	-	Haus6	protein_coding	B1AXR2,Q6NV99	B1AXR2_MOUSE,Q6NV99_MOUSE	Protein Haus6,Protein Haus6 Uncharacterized protein	Haus6,Haus6 6230416J20Rik	ENSMUST00000125481,ENSMUST00000070607	ENSMUSP00000118609,ENSMUSP00000070504	ENSMUSG00000038047,ENSMUSG00000038047	1574.95	1713.52	1436.37	-0.254375	0.00402607	0.0931681
ENSMUSG00000014077	chr2	119547697	119587027	+	Chp1	protein_coding	B0R091,B0R092,P61022 Q62877 Q6ZWQ8	B0R091_MOUSE,B0R092_MOUSE,CHP1_MOUSE	Calcineurin B homologous protein 1,Calcineurin B homologous protein 1,Calcineurin B homologous protein 1	Chp1 1500003O03Rik,Chp1 1500003O03Rik,Chp1 Chp Sid470	ENSMUST00000119172,ENSMUST00000132448,ENSMUST00000014221	ENSMUSP00000114013,ENSMUSP00000122946,ENSMUSP00000014221	ENSMUSG00000014077,ENSMUSG00000014077,ENSMUSG00000014077	2270.91	2094.53	2447.28	0.22445	0.00410744	0.0941166
ENSMUSG00000020601	chr12	15791727	15816877	-	Trib2	protein_coding	Q8K4K3 Q8K017 Q8R2V8	TRIB2_MOUSE	Tribbles homolog 2	Trib2	ENSMUST00000020922	ENSMUSP00000020922	ENSMUSG00000020601	1557.81	1425.9	1689.72	0.244748	0.00409249	0.0941166
ENSMUSG00000027435	chr2	148436640	148443563	-	Cd93	protein_coding	O89103 A2AVY5 Q3U2X0	C1QR1_MOUSE	Complement component C1q receptor	Cd93 Aa4 C1qr1 C1qrp Ly68	ENSMUST00000099269	ENSMUSP00000096876	ENSMUSG00000027435	9469.17	8886.33	10052	0.177807	0.00410325	0.0941166
ENSMUSG00000048376	chr13	95601804	95618459	-	F2r	protein_coding	P30558 P97507 Q3TVP3	PAR1_MOUSE	Proteinase-activated receptor 1	F2r Cf2r Par1	ENSMUST00000059193	ENSMUSP00000061754	ENSMUSG00000048376	5633.48	5246.52	6020.45	0.198474	0.0040992	0.0941166
ENSMUSG00000022270	chr15	25843264	25973687	+	Fam134b	protein_coding	E9QPM1,Q8VE91 Q7TMY5 Q9CUJ4 Q9D8Z5	E9QPM1_MOUSE,F134B_MOUSE	Protein FAM134B,Protein FAM134B	Fam134b,Fam134b	ENSMUST00000022881,ENSMUST00000110438	ENSMUSP00000022881,ENSMUSP00000106068	ENSMUSG00000022270,ENSMUSG00000022270	1088.74	972.729	1204.75	0.30834	0.00413834	0.0945376
ENSMUSG00000022322	chr8	4735980	4779534	-	Shcbp1	protein_coding	Q9Z179 Q3UED9 Q3UMD9	SHCBP_MOUSE	SHC SH2 domain-binding protein 1	Shcbp1 Pal	ENSMUST00000022945	ENSMUSP00000022945	ENSMUSG00000022322	1198.53	1317.38	1079.69	-0.28682	0.00414318	0.0945376
ENSMUSG00000035969	chr4	43381979	43427088	+	Rusc2	protein_coding	B0QZZ9,B0R000,B0R001,B0R002,B0R003,B0R004,G3UXJ5,G3UYW4,G8JL85,Q3V1Z0	B0QZZ9_MOUSE,B0R000_MOUSE,B0R001_MOUSE,B0R002_MOUSE,B0R003_MOUSE,B0R004_MOUSE,G3UXJ5_MOUSE,G3UYW4_MOUSE,G8JL85_MOUSE,Q3V1Z0_MOUSE	Iporin,Iporin,Iporin,Iporin,Iporin,Iporin,Iporin,Iporin,Iporin,Iporin	Rusc2,Rusc2,Rusc2,Rusc2,Rusc2,Rusc2,Rusc2,Rusc2,Rusc2,Rusc2	ENSMUST00000125399,ENSMUST00000152322,ENSMUST00000144911,ENSMUST00000135216,ENSMUST00000136360,ENSMUST00000139198,ENSMUST00000173682,ENSMUST00000149221,ENSMUST00000131668,ENSMUST00000035645 ENSMUST00000098106	ENSMUSP00000116700,ENSMUSP00000121298,ENSMUSP00000121762,ENSMUSP00000115081,ENSMUSP00000123431,ENSMUSP00000121528,ENSMUSP00000133715,ENSMUSP00000134247,ENSMUSP00000118528,ENSMUSP00000038379	ENSMUSG00000035969,ENSMUSG00000035969,ENSMUSG00000035969,ENSMUSG00000035969,ENSMUSG00000035969,ENSMUSG00000035969,ENSMUSG00000035969,ENSMUSG00000035969,ENSMUSG00000035969,ENSMUSG00000035969	1723.96	1581.42	1866.51	0.238983	0.00418038	0.0951868
ENSMUSG00000032536	chr9	121366958	121474916	+	Trak1	protein_coding	Q6PD31 Q8BYA3	TRAK1_MOUSE	Trafficking kinesin-binding protein 1	Trak1	ENSMUST00000045903	ENSMUSP00000044482	ENSMUSG00000032536	2701.87	2494.33	2909.42	0.221995	0.00422315	0.0958929
ENSMUSG00000042364	chr13	113592180	113618564	-	Snx18	protein_coding	Q8C788	Q8C788_MOUSE	Sorting nexin	Snx18 Snag1	ENSMUST00000109241	ENSMUSP00000104864	ENSMUSG00000042364	2239.18	2068.6	2409.76	0.220135	0.00422902	0.0958929
ENSMUSG00000026547	chr1	172500047	172507380	+	Tagln2	protein_coding	Q9WVA4 Q3TIB8 Q6A0C6 Q78ZX2 Q91VU2	TAGL2_MOUSE	Transgelin-2	Tagln2 Kiaa0120	ENSMUST00000111228 ENSMUST00000111230	ENSMUSP00000106859	ENSMUSG00000026547	10437.1	9817.3	11057	0.171545	0.00425906	0.0961735
ENSMUSG00000028820	chr4	127021324	127037013	+	Sfpq	protein_coding	Q8VIJ6 A2A7U6 Q9ERW2	SFPQ_MOUSE	Splicing factor, proline- and glutamine-rich	Sfpq	ENSMUST00000030623	ENSMUSP00000030623	ENSMUSG00000028820	13989.2	14935.3	13043.1	-0.19542	0.00425231	0.0961735
ENSMUSG00000068735	chr2	93187548	93201759	+	Trp53i11	protein_coding	A2AGS6,Q4QQM4 Q3UQL4	A2AGS6_MOUSE,P5I11_MOUSE	Tumor protein p53-inducible protein 11,Tumor protein p53-inducible protein 11	Trp53i11,Trp53i11 Pig11 Tp53i11	ENSMUST00000150462,ENSMUST00000090554 ENSMUST00000111266	ENSMUSP00000115918,ENSMUSP00000088042	ENSMUSG00000068735,ENSMUSG00000068735	2256.59	2063.1	2450.08	0.247905	0.00427533	0.096341
ENSMUSG00000000037	chrX	161117193	161258213	+	Scml2	protein_coding	B1AVB1,B1AVB2,B1AVB3,B1AVB4,B1AVB5,E9Q796	B1AVB1_MOUSE,B1AVB2_MOUSE,B1AVB3_MOUSE,B1AVB4_MOUSE,B1AVB5_MOUSE,E9Q796_MOUSE	Protein Scml2 Sex comb on midleg-like 2 (Drosophila), isoform CRA_c,Protein Scml2,Protein Scml2,Protein Scml2,Protein Scml2,Protein Scml2	Scml2 mCG_115154,Scml2,Scml2,Scml2,Scml2,Scml2	ENSMUST00000101113,ENSMUST00000087090,ENSMUST00000077375,ENSMUST00000074802,ENSMUST00000019101,ENSMUST00000112345	ENSMUSP00000098672,ENSMUSP00000084325,ENSMUSP00000076593,ENSMUSP00000074356,ENSMUSP00000019101,ENSMUSP00000107964	ENSMUSG00000000037,ENSMUSG00000000037,ENSMUSG00000000037,ENSMUSG00000000037,ENSMUSG00000000037,ENSMUSG00000000037	427.974	491.112	364.835	-0.427793	0.00429104	0.0964951
ENSMUSG00000002944	chr5	17781690	17888801	-	Cd36	protein_coding	Q08857	CD36_MOUSE	Platelet glycoprotein 4	Cd36	ENSMUST00000082367 ENSMUST00000165232 ENSMUST00000169095 ENSMUST00000170051	ENSMUSP00000080974	ENSMUSG00000002944	5481.65	5104.6	5858.7	0.198747	0.00431546	0.0965992
ENSMUSG00000004207	chr10	60277627	60302597	+	Psap	protein_coding	E9PZ00,J3QPG5,K3W4L3,Q61207 Q60861 Q64006 Q64219,Q8BFQ1	E9PZ00_MOUSE,J3QPG5_MOUSE,K3W4L3_MOUSE,SAP_MOUSE,Q8BFQ1_MOUSE	Sulfated glycoprotein 1,Sulfated glycoprotein 1,Sulfated glycoprotein 1,Sulfated glycoprotein 1,Prosaposin, isoform CRA_a Psap protein Sulfated glycoprotein 1	Psap,Psap,Psap,Psap Sgp1,Psap mCG_61290	ENSMUST00000165878,ENSMUST00000177779,ENSMUST00000004316,ENSMUST00000179238,ENSMUST00000105465	ENSMUSP00000126407,ENSMUSP00000137286,ENSMUSP00000004316,ENSMUSP00000137476,ENSMUSP00000101105	ENSMUSG00000004207,ENSMUSG00000004207,ENSMUSG00000004207,ENSMUSG00000004207,ENSMUSG00000004207	8240.58	7759.87	8721.29	0.168488	0.00433906	0.0965992
ENSMUSG00000027523	chr2	174284320	174346744	+	Gnas	protein_coding	A2A610,A6PW70,A6PW71,P63094 A2A611 A2A612 A2A613 P04894 P08755 Q3KQM5 Q3TFV3 Q3TWS9 Q3UI70 Q58E62 Q6P7U9 Q80ZK6 Q8K5E1 Q9Z1R7,Q6R0H6 A6PW72 Q8BIR3,Q6R0H7 A2A607 A2A608 Q6R0H4 Q6R0H5 Q6R2J5 Q9JJX0 Q9Z1N8,Q9Z0F1 Q9QXW5 Q9Z0H2	A2A610_MOUSE,A6PW70_MOUSE,A6PW71_MOUSE,GNAS2_MOUSE,ALEX_MOUSE,GNAS1_MOUSE,GNAS3_MOUSE	Guanine nucleotide-binding protein G(s) subunit alpha isoforms short,Guanine nucleotide-binding protein G(s) subunit alpha isoforms short,Guanine nucleotide-binding protein G(s) subunit alpha isoforms short,Guanine nucleotide-binding protein G(s) subunit alpha isoforms short,Protein ALEX,Guanine nucleotide-binding protein G(s) subunit alpha isoforms XLas,Neuroendocrine secretory protein 55	Gnas,Gnas,Gnas,Gnas Gnas1 MNCb-5546,Gnas Gnas1,Gnas Gnas1,Gnas Gnas1	ENSMUST00000109083,ENSMUST00000130940,ENSMUST00000130761,ENSMUST00000087871 ENSMUST00000109085 ENSMUST00000109087,ENSMUST00000109088,ENSMUST00000080493 ENSMUST00000087876 ENSMUST00000087877,ENSMUST00000109095 ENSMUST00000109096 ENSMUST00000180362	ENSMUSP00000104711,ENSMUSP00000118210,ENSMUSP00000122230,ENSMUSP00000085179,ENSMUSP00000104716,ENSMUSP00000079341,ENSMUSP00000104723	ENSMUSG00000027523,ENSMUSG00000027523,ENSMUSG00000027523,ENSMUSG00000027523,ENSMUSG00000027523,ENSMUSG00000027523,ENSMUSG00000027523	3103.91	3329.59	2878.24	-0.210091	0.00431539	0.0965992
ENSMUSG00000029188	chr5	53038081	53071664	+	Slc34a2	protein_coding	E9Q0Z3,E9QAX5,Q9DBP0 Q9Z290	E9Q0Z3_MOUSE,E9QAX5_MOUSE,NPT2B_MOUSE	Sodium-dependent phosphate transport protein 2B,Sodium-dependent phosphate transport protein 2B,Sodium-dependent phosphate transport protein 2B	Slc34a2,Slc34a2,Slc34a2 Npt2b	ENSMUST00000168667,ENSMUST00000170523,ENSMUST00000094787	ENSMUSP00000132328,ENSMUSP00000130692,ENSMUSP00000092380	ENSMUSG00000029188,ENSMUSG00000029188,ENSMUSG00000029188	16414.4	13287.7	19541.1	0.556389	0.00433681	0.0965992
ENSMUSG00000039103	chr3	152236982	152266350	-	Nexn	protein_coding	Q7TPW1 E9QJX5 Q3TQP3 Q3UWU2 Q3UWU6 Q3UX39	NEXN_MOUSE	Nexilin	Nexn	ENSMUST00000046045	ENSMUSP00000037120	ENSMUSG00000039103	4393.73	4700.02	4087.44	-0.201424	0.00434004	0.0965992
ENSMUSG00000032035	chr9	32636221	32757820	+	Ets1	protein_coding	E9PWI8,P27577 Q61403,V9GX28,V9GXE2	E9PWI8_MOUSE,ETS1_MOUSE,V9GX28_MOUSE,V9GXE2_MOUSE	Protein C-ets-1,Protein C-ets-1,Protein C-ets-1,Protein C-ets-1	Ets1,Ets1 Ets-1,Ets1,Ets1	ENSMUST00000050797,ENSMUST00000034534,ENSMUST00000184887,ENSMUST00000184364	ENSMUSP00000051303,ENSMUSP00000034534,ENSMUSP00000138951,ENSMUSP00000139107	ENSMUSG00000032035,ENSMUSG00000032035,ENSMUSG00000032035,ENSMUSG00000032035	7596.2	7132.95	8059.45	0.176158	0.00434965	0.0966155
ENSMUSG00000043467	chr1	161002922	161034849	-	Zbtb37	protein_coding	F7ALN1,H3BJ23,Q8C3U9	F7ALN1_MOUSE,H3BJ23_MOUSE,Q8C3U9_MOUSE	Protein Zbtb37,Protein Zbtb37,Protein Zbtb37 Zinc finger and BTB domain containing 37	Zbtb37,Zbtb37,Zbtb37 mCG_51422	ENSMUST00000171748,ENSMUST00000177003,ENSMUST00000159250 ENSMUST00000160056 ENSMUST00000162226 ENSMUST00000163079 ENSMUST00000172044	ENSMUSP00000129965,ENSMUSP00000134816,ENSMUSP00000125417	ENSMUSG00000043467,ENSMUSG00000043467,ENSMUSG00000043467	2557.6	2793.39	2321.81	-0.266659	0.00437847	0.0970575
ENSMUSG00000021273	chr14	63145153	63177793	-	Fdft1	protein_coding	P53798 Q8BPF5	FDFT_MOUSE	Squalene synthase	Fdft1 Erg9	ENSMUST00000054963	ENSMUSP00000055313	ENSMUSG00000021273	1026.96	924.359	1129.55	0.288942	0.00440112	0.0971386
ENSMUSG00000036223	chr18	74195299	74207818	-	Ska1	protein_coding	Q9CPV1 Q005W7 Q8VE34 Q9CYW9	SKA1_MOUSE	Spindle and kinetochore-associated protein 1	Ska1	ENSMUST00000040188 ENSMUST00000177604	ENSMUSP00000049156	ENSMUSG00000036223	483.361	550.285	416.437	-0.401242	0.0044089	0.0971386
ENSMUSG00000062248	chr13	51645232	51650660	+	Cks2	protein_coding	P56390	CKS2_MOUSE	Cyclin-dependent kinases regulatory subunit 2	Cks2	ENSMUST00000075853	ENSMUSP00000075250	ENSMUSG00000062248	660.13	739.072	581.187	-0.346182	0.004392	0.0971386
ENSMUSG00000023046	chr15	102144362	102149511	+	Igfbp6	protein_coding	P47880 Q91X24	IBP6_MOUSE	Insulin-like growth factor-binding protein 6	Igfbp6 Igfbp-6	ENSMUST00000023807	ENSMUSP00000023807	ENSMUSG00000023046	878.511	674.535	1082.49	0.681578	0.0044417	0.0976046
ENSMUSG00000034349	chr3	69004738	69034623	+	Smc4	protein_coding	D6RCX2,E9Q2X6,Q3U763,Q8CG47 Q8BTS7 Q8BTY9 Q99K21	D6RCX2_MOUSE,E9Q2X6_MOUSE,Q3U763_MOUSE,SMC4_MOUSE	Structural maintenance of chromosomes protein 4,Structural maintenance of chromosomes protein,Structural maintenance of chromosomes protein 4,Structural maintenance of chromosomes protein 4	Smc4,Smc4,Smc4 Smc4l1,Smc4 Capc Smc4l1	ENSMUST00000148385,ENSMUST00000107803,ENSMUST00000136502,ENSMUST00000042901	ENSMUSP00000123350,ENSMUSP00000103433,ENSMUSP00000115033,ENSMUSP00000047872	ENSMUSG00000034349,ENSMUSG00000034349,ENSMUSG00000034349,ENSMUSG00000034349	7832.93	8353.7	7312.16	-0.192092	0.00444799	0.0976046
ENSMUSG00000026238	chr1	86526726	86530712	+	Ptma	protein_coding	P26350 Q3UQV6	PTMA_MOUSE	Prothymosin alpha	Ptma	ENSMUST00000045897	ENSMUSP00000044188	ENSMUSG00000026238	13581.1	14350.7	12811.6	-0.163669	0.00448727	0.0982685
ENSMUSG00000021990	chr14	60634001	60764556	+	Spata13	protein_coding	E0CXN6,E0CYU0,E0CZ51,E9Q3I3,F6SRZ4,F6V9S1	E0CXN6_MOUSE,E0CYU0_MOUSE,E0CZ51_MOUSE,E9Q3I3_MOUSE,F6SRZ4_MOUSE,F6V9S1_MOUSE	Spermatogenesis-associated protein 13,Spermatogenesis-associated protein 13,Spermatogenesis-associated protein 13,Spermatogenesis-associated protein 13,Spermatogenesis-associated protein 13,Spermatogenesis-associated protein 13	Spata13,Spata13,Spata13,Spata13,Spata13,Spata13	ENSMUST00000159169,ENSMUST00000162945,ENSMUST00000159729,ENSMUST00000022566 ENSMUST00000160973,ENSMUST00000162131,ENSMUST00000160095	ENSMUSP00000125163,ENSMUSP00000123888,ENSMUSP00000125702,ENSMUSP00000022566,ENSMUSP00000124586,ENSMUSP00000123744	ENSMUSG00000021990,ENSMUSG00000021990,ENSMUSG00000021990,ENSMUSG00000021990,ENSMUSG00000021990,ENSMUSG00000021990	1335.22	1215.63	1454.81	0.258928	0.00450593	0.098479
ENSMUSG00000024112	chr17	25374285	25433783	-	Cacna1h	protein_coding	E0CYZ3,E9Q6E4,E9Q6P9,F6U5P7,F6USE5	E0CYZ3_MOUSE,E9Q6E4_MOUSE,E9Q6P9_MOUSE,F6U5P7_MOUSE,F6USE5_MOUSE	Voltage-dependent T-type calcium channel subunit alpha-1H,Voltage-dependent T-type calcium channel subunit alpha-1H,Voltage-dependent T-type calcium channel subunit alpha-1H,Voltage-dependent T-type calcium channel subunit alpha-1H,Voltage-dependent T-type calcium channel subunit alpha-1H	Cacna1h,Cacna1h,Cacna1h,Cacna1h,Cacna1h	ENSMUST00000159048,ENSMUST00000159623,ENSMUST00000078496 ENSMUST00000159610,ENSMUST00000161658,ENSMUST00000161035	ENSMUSP00000123741,ENSMUSP00000125664,ENSMUSP00000077586,ENSMUSP00000124883,ENSMUSP00000123906	ENSMUSG00000024112,ENSMUSG00000024112,ENSMUSG00000024112,ENSMUSG00000024112,ENSMUSG00000024112	402.079	459.7	344.459	-0.415313	0.00452656	0.0985615
ENSMUSG00000030247	chr6	142564939	142571356	-	Kcnj8	protein_coding	P97794	KCNJ8_MOUSE	ATP-sensitive inward rectifier potassium channel 8	Kcnj8	ENSMUST00000032374	ENSMUSP00000032374	ENSMUSG00000030247	454.855	379.088	530.622	0.484066	0.00453792	0.0985615
ENSMUSG00000035105	chr12	54178981	54203860	-	Egln3	protein_coding	Q91UZ4 Q3TCG8 Q8C8M6 Q8CCA8 Q8R5C7	EGLN3_MOUSE	Egl nine homolog 3	Egln3	ENSMUST00000039516	ENSMUSP00000041874	ENSMUSG00000035105	1395.63	1252.64	1538.62	0.296456	0.00454593	0.0985615
ENSMUSG00000041734	chr3	87078593	87174747	-	Kirrel	protein_coding	Q80W68 Q8CIJ4 Q8CJ59 Q923L4	KIRR1_MOUSE	Kin of IRRE-like protein 1	Kirrel Kirrel1 Neph1	ENSMUST00000041732 ENSMUST00000107618 ENSMUST00000159976	ENSMUSP00000043756	ENSMUSG00000041734	2566.05	2775.36	2356.75	-0.235782	0.00453848	0.0985615
ENSMUSG00000022324	chr15	34306680	34436242	+	Matn2	protein_coding	O08746 E9QPK9 Q8R542	MATN2_MOUSE	Matrilin-2	Matn2	ENSMUST00000022947	ENSMUSP00000022947	ENSMUSG00000022324	1094.88	988.178	1201.58	0.281826	0.00456858	0.0988557
ENSMUSG00000038178	chr11	75531694	75577575	+	Slc43a2	protein_coding	Q5ND23,Q5ND24,Q5ND25,Q8CGA3 Q5CD76	Q5ND23_MOUSE,Q5ND24_MOUSE,Q5ND25_MOUSE,LAT4_MOUSE	Large neutral amino acids transporter small subunit 4,Large neutral amino acids transporter small subunit 4,Large neutral amino acids transporter small subunit 4,Large neutral amino acids transporter small subunit 4	Slc43a2,Slc43a2,Slc43a2,Slc43a2 Lat4	ENSMUST00000127226,ENSMUST00000143035,ENSMUST00000149727,ENSMUST00000042561 ENSMUST00000108433 ENSMUST00000169547	ENSMUSP00000117264,ENSMUSP00000123101,ENSMUSP00000116255,ENSMUSP00000046074	ENSMUSG00000038178,ENSMUSG00000038178,ENSMUSG00000038178,ENSMUSG00000038178	854.957	762.132	947.782	0.314144	0.0045877	0.0990724
ENSMUSG00000026014	chr1	60482292	60567104	-	Raph1	protein_coding	F2Z3U3,F2Z3X7,F2Z4B7,G5E867,S4R2K5	F2Z3U3_MOUSE,F2Z3X7_MOUSE,F2Z4B7_MOUSE,G5E867_MOUSE,S4R2K5_MOUSE	Protein Raph1,Protein Raph1,Protein Raph1,MCG116540, isoform CRA_b Protein Raph1,Protein Raph1	Raph1,Raph1,Raph1,Raph1 mCG_116540,Raph1	ENSMUST00000140485,ENSMUST00000142258,ENSMUST00000090293,ENSMUST00000027168,ENSMUST00000182085	ENSMUSP00000121023,ENSMUSP00000120638,ENSMUSP00000087763,ENSMUSP00000027168,ENSMUSP00000138682	ENSMUSG00000026014,ENSMUSG00000026014,ENSMUSG00000026014,ENSMUSG00000026014,ENSMUSG00000026014	5764.44	6165.93	5362.95	-0.201258	0.00467204	0.100563
ENSMUSG00000032525	chr9	121719169	121756843	+	Nktr	protein_coding	P30415 F8VPR8 Q3UNH0,Q3TQ51 D3Z303,Q8CBP6,S4R1C3,S4R1L7,S4R220,S4R2C2,S4R2L3	NKTR_MOUSE,Q3TQ51_MOUSE,Q8CBP6_MOUSE,S4R1C3_MOUSE,S4R1L7_MOUSE,S4R220_MOUSE,S4R2C2_MOUSE,S4R2L3_MOUSE	NK-tumor recognition protein,Peptidyl-prolyl cis-trans isomerase,NK-tumor recognition protein,Peptidyl-prolyl cis-trans isomerase,NK-tumor recognition protein,NK-tumor recognition protein,NK-tumor recognition protein,NK-tumor recognition protein	Nktr,Nktr,Nktr,Nktr,Nktr,Nktr,Nktr,Nktr	ENSMUST00000035112,ENSMUST00000182179 ENSMUST00000183070,ENSMUST00000182225,ENSMUST00000182337,ENSMUST00000182763,ENSMUST00000182503,ENSMUST00000182713,ENSMUST00000182311	ENSMUSP00000035112,ENSMUSP00000138437,ENSMUSP00000138168,ENSMUSP00000138164,ENSMUSP00000138272,ENSMUSP00000138463,ENSMUSP00000138587,ENSMUSP00000138690	ENSMUSG00000032525,ENSMUSG00000032525,ENSMUSG00000032525,ENSMUSG00000032525,ENSMUSG00000032525,ENSMUSG00000032525,ENSMUSG00000032525,ENSMUSG00000032525	9702.35	10358.5	9046.15	-0.195424	0.0046752	0.100563
ENSMUSG00000069515	chr10	117287796	117292868	-	Lyz1	protein_coding	P17897	LYZ1_MOUSE	Lysozyme C-1	Lyz1 Lzp-s	ENSMUST00000092162	ENSMUSP00000089800	ENSMUSG00000069515	884.569	475.275	1293.86	1.44293	0.00470227	0.100946
ENSMUSG00000028328	chr4	46038935	46116032	+	Tmod1	protein_coding	G3UYG4,P49813 Q3KP84 Q9ERR9	G3UYG4_MOUSE,TMOD1_MOUSE	Tropomodulin-1,Tropomodulin-1	Tmod1,Tmod1 Tmod	ENSMUST00000156200,ENSMUST00000107773	ENSMUSP00000134075,ENSMUSP00000103402	ENSMUSG00000028328,ENSMUSG00000028328	362.109	307.661	416.556	0.435946	0.00471867	0.101098
ENSMUSG00000000600	chr5	3803184	3845564	+	Krit1	protein_coding	Q6S5J6 Q6VSV2 Q7TPR8 Q8C9Q6 Q9EPY2 Q9ERH0	KRIT1_MOUSE	Krev interaction trapped protein 1	Krit1 Ccm1	ENSMUST00000080085 ENSMUST00000171023	ENSMUSP00000078985	ENSMUSG00000000600	2786.85	3006.48	2567.21	-0.227793	0.00476445	0.101679
ENSMUSG00000062115	chr11	60105013	60199197	+	Rai1	protein_coding	B1AU85,Q61818 B1AU87 Q6ZPH7 Q8CEV1	B1AU85_MOUSE,RAI1_MOUSE	Retinoic acid-induced protein 1,Retinoic acid-induced protein 1	Rai1,Rai1 Kiaa1820	ENSMUST00000132012,ENSMUST00000064190 ENSMUST00000090806 ENSMUST00000102688 ENSMUST00000171108	ENSMUSP00000118543,ENSMUSP00000070896	ENSMUSG00000062115,ENSMUSG00000062115	4113.73	4382.68	3844.77	-0.188867	0.00475587	0.101679
ENSMUSG00000034227	chr11	116330704	116335399	-	Foxj1	protein_coding	Q61660 Q3US42	FOXJ1_MOUSE	Forkhead box protein J1	Foxj1 Fkhl13 Hfh4	ENSMUST00000036215	ENSMUSP00000038351	ENSMUSG00000034227	1667.45	1519.61	1815.28	0.256335	0.00478696	0.101693
ENSMUSG00000041351	chr4	137664726	137729861	+	Rap1gap	protein_coding	A2ALS2,A2ALS3,A2ALS4,A2ALS5 E9PZZ8 Q6A063 Q80VZ8 Q8K2L6,A2ALS7	A2ALS2_MOUSE,A2ALS3_MOUSE,A2ALS4_MOUSE,RPGP1_MOUSE,A2ALS7_MOUSE	Rap1 GTPase-activating protein 1,Rap1 GTPase-activating protein 1,Rap1 GTPase-activating protein 1,Rap1 GTPase-activating protein 1,Rap1 GTPase-activating protein 1	Rap1gap,Rap1gap,Rap1gap,Rap1gap Kiaa0474 Rap1ga1,Rap1gap	ENSMUST00000152567,ENSMUST00000150928,ENSMUST00000105835,ENSMUST00000047243 ENSMUST00000097837,ENSMUST00000141306	ENSMUSP00000115391,ENSMUSP00000123561,ENSMUSP00000101461,ENSMUSP00000042473,ENSMUSP00000122315	ENSMUSG00000041351,ENSMUSG00000041351,ENSMUSG00000041351,ENSMUSG00000041351,ENSMUSG00000041351	996.305	889.354	1103.26	0.310624	0.00479316	0.101693
ENSMUSG00000054364	chr12	8497763	8499985	-	Rhob	protein_coding	P62746 P01121 Q9CUV7	RHOB_MOUSE	Rho-related GTP-binding protein RhoB	Rhob Arhb	ENSMUST00000067384	ENSMUSP00000067013	ENSMUSG00000054364	4048.28	3751.19	4345.37	0.212077	0.0047889	0.101693
ENSMUSG00000005514	chr5	135670033	135735326	+	Por	protein_coding	E9PVT9,E9Q997,F6R7H8,P37040,Q05DV1	E9PVT9_MOUSE,E9Q997_MOUSE,F6R7H8_MOUSE,NCPR_MOUSE,Q05DV1_MOUSE	NADPH--cytochrome P450 reductase,NADPH--cytochrome P450 reductase,NADPH--cytochrome P450 reductase,NADPH--cytochrome P450 reductase,NADPH--cytochrome P450 reductase Por protein	Por,Por,Por,Por,Por	ENSMUST00000153515,ENSMUST00000153500,ENSMUST00000127096,ENSMUST00000005651,ENSMUST00000122113	ENSMUSP00000121022,ENSMUSP00000121531,ENSMUSP00000119138,ENSMUSP00000005651,ENSMUSP00000112924	ENSMUSG00000005514,ENSMUSG00000005514,ENSMUSG00000005514,ENSMUSG00000005514,ENSMUSG00000005514	1974.97	1811.97	2137.97	0.238564	0.00482299	0.102127
ENSMUSG00000028842	chr4	126331704	126429556	-	Ago3	protein_coding	A3KFX6,A3KFX7,Q8CJF9 Q3TBP7	A3KFX6_MOUSE,A3KFX7_MOUSE,AGO3_MOUSE	Protein argonaute-3,Protein argonaute-3,Protein argonaute-3	Ago3 Eif2c3,Ago3 Eif2c3,Ago3 Eif2c3	ENSMUST00000132123,ENSMUST00000127831,ENSMUST00000069097	ENSMUSP00000116204,ENSMUSP00000118577,ENSMUSP00000066633	ENSMUSG00000028842,ENSMUSG00000028842,ENSMUSG00000028842	2613.4	2851.3	2375.5	-0.263286	0.00485589	0.102425
ENSMUSG00000030218	chr6	136872436	136875805	-	Mgp	protein_coding	P19788 Q6LD77 Q8JZW0	MGP_MOUSE	Matrix Gla protein	Mgp Mglap	ENSMUST00000032342	ENSMUSP00000032342	ENSMUSG00000030218	8103.71	7627.69	8579.74	0.169666	0.00485109	0.102425
ENSMUSG00000015709	chr7	84246281	84409959	-	Arnt2	protein_coding	Q61324 Q7TQG2 Q8CHG9	ARNT2_MOUSE	Aryl hydrocarbon receptor nuclear translocator 2	Arnt2 Kiaa0307	ENSMUST00000085077	ENSMUSP00000082154	ENSMUSG00000015709	994.447	1095.18	893.712	-0.292992	0.00488547	0.1028
ENSMUSG00000032232	chr9	71626509	71771602	-	Cgnl1	protein_coding	B2RSU6,D3Z3H4	B2RSU6_MOUSE,D3Z3H4_MOUSE	Cingulin-like 1 Cingulin-like protein 1,Cingulin-like protein 1	Cgnl1,Cgnl1	ENSMUST00000072899 ENSMUST00000122065,ENSMUST00000121322	ENSMUSP00000072672,ENSMUSP00000113917	ENSMUSG00000032232,ENSMUSG00000032232	3680.93	3435.39	3926.47	0.192705	0.00489253	0.1028
ENSMUSG00000034936	chr11	101665541	101667832	+	Arl4d	protein_coding	Q99PE9 Q9CQB1	ARL4D_MOUSE	ADP-ribosylation factor-like protein 4D	Arl4d Arf4l Arl5	ENSMUST00000039388	ENSMUSP00000035918	ENSMUSG00000034936	296.606	249.083	344.129	0.464731	0.004908	0.102885
ENSMUSG00000098090	chr17	94750100	94775132	+	2700099C18Rik	transcribed_unprocessed_pseudogene								591.338	662.683	519.993	-0.34923	0.0049155	0.102885
ENSMUSG00000016528	chr1	131053700	131097826	-	Mapkapk2	protein_coding	P49138 Q6P561	MAPK2_MOUSE	MAP kinase-activated protein kinase 2	Mapkapk2 Rps6kc1	ENSMUST00000016672	ENSMUSP00000016672	ENSMUSG00000016528	4382.45	4066.72	4698.18	0.208187	0.00494775	0.103163
ENSMUSG00000035842	chr17	66123520	66152167	+	Ddx11	protein_coding	Q6AXC6	DDX11_MOUSE	Probable ATP-dependent RNA helicase DDX11	Ddx11	ENSMUST00000163605	ENSMUSP00000130440	ENSMUSG00000035842	966.271	1064.18	868.359	-0.293077	0.00494465	0.103163
ENSMUSG00000045672	chr4	63214004	63334991	+	Col27a1	protein_coding	Q5QNQ9 Q69Z83 Q80UA8,V9GXJ0,V9GXJ7	CORA1_MOUSE,V9GXJ0_MOUSE,V9GXJ7_MOUSE	Collagen alpha-1(XXVII) chain,Collagen alpha-1(XXVII) chain,Collagen alpha-1(XXVII) chain	Col27a1 Kiaa1870,Col27a1,Col27a1	ENSMUST00000036300,ENSMUST00000184067,ENSMUST00000183913	ENSMUSP00000043816,ENSMUSP00000139173,ENSMUSP00000139182	ENSMUSG00000045672,ENSMUSG00000045672,ENSMUSG00000045672	4464.39	4764.73	4164.05	-0.194362	0.00496356	0.103295
ENSMUSG00000024479	chr15	54571366	54602846	+	Mal2	protein_coding	Q8BI08	MAL2_MOUSE	Protein MAL2	Mal2	ENSMUST00000025356	ENSMUSP00000025356	ENSMUSG00000024479	7707.36	7260.47	8154.25	0.167468	0.00498949	0.103637
ENSMUSG00000005881	chr2	156008045	156018279	+	Ergic3	protein_coding	F6RK81,F6UIS1,Q9CQE7 B7ZCN9 Q6PGA7	F6RK81_MOUSE,F6UIS1_MOUSE,ERGI3_MOUSE	Endoplasmic reticulum-Golgi intermediate compartment protein 3,Endoplasmic reticulum-Golgi intermediate compartment protein 3,Endoplasmic reticulum-Golgi intermediate compartment protein 3	Ergic3,Ergic3,Ergic3 Erv46 Sdbcag84	ENSMUST00000155370,ENSMUST00000142859,ENSMUST00000006035 ENSMUST00000088650	ENSMUSP00000119051,ENSMUSP00000115912,ENSMUSP00000006035	ENSMUSG00000005881,ENSMUSG00000005881,ENSMUSG00000005881	2930.46	2721.15	3139.76	0.206365	0.00504961	0.104628
ENSMUSG00000021939	chr14	63122462	63145919	+	Ctsb	protein_coding	P10605 Q3UDW7	CATB_MOUSE	Cathepsin B	Ctsb	ENSMUST00000006235	ENSMUSP00000006235	ENSMUSG00000021939	6591.61	6182.29	7000.92	0.179375	0.00505646	0.104628
ENSMUSG00000006301	chr1	74288247	74305622	-	Tmbim1	protein_coding	D3Z0A5,D3Z225,F6YG30,Q3U717	D3Z0A5_MOUSE,D3Z225_MOUSE,F6YG30_MOUSE,Q3U717_MOUSE	Protein lifeguard 3,Protein lifeguard 3,Protein lifeguard 3,Protein lifeguard 3 Transmembrane BAX inhibitor motif containing 1, isoform CRA_b	Tmbim1,Tmbim1,Tmbim1,Tmbim1 mCG_114808	ENSMUST00000141560,ENSMUST00000130763,ENSMUST00000128505,ENSMUST00000016309 ENSMUST00000113796	ENSMUSP00000115444,ENSMUSP00000121814,ENSMUSP00000122874,ENSMUSP00000016309	ENSMUSG00000006301,ENSMUSG00000006301,ENSMUSG00000006301,ENSMUSG00000006301	2966.34	2746.6	3186.09	0.214072	0.00508694	0.104747
ENSMUSG00000030340	chr6	125320659	125344943	+	Scnn1a	protein_coding	H3BJC3,H3BKC4,H3BKP2,H3BKW1,H3BLI2,Q3USG4	H3BJC3_MOUSE,H3BKC4_MOUSE,H3BKP2_MOUSE,H3BKW1_MOUSE,H3BLI2_MOUSE,Q3USG4_MOUSE	Amiloride-sensitive sodium channel subunit alpha,Amiloride-sensitive sodium channel subunit alpha,Amiloride-sensitive sodium channel subunit alpha,Amiloride-sensitive sodium channel subunit alpha,Amiloride-sensitive sodium channel subunit alpha,Amiloride-sensitive sodium channel subunit alpha Sodium channel, nonvoltage-gated 1 alpha	Scnn1a,Scnn1a,Scnn1a,Scnn1a,Scnn1a,Scnn1a	ENSMUST00000176110 ENSMUST00000177329,ENSMUST00000176442,ENSMUST00000176365,ENSMUST00000175966,ENSMUST00000176655,ENSMUST00000081440	ENSMUSP00000134940,ENSMUSP00000135336,ENSMUSP00000135467,ENSMUSP00000135551,ENSMUSP00000135798,ENSMUSP00000080164	ENSMUSG00000030340,ENSMUSG00000030340,ENSMUSG00000030340,ENSMUSG00000030340,ENSMUSG00000030340,ENSMUSG00000030340	2928.05	2375.69	3480.42	0.550726	0.00509105	0.104747
ENSMUSG00000054675	chr5	113793729	113800516	-	Tmem119	protein_coding	E0CYG1,Q8R138 Q8BP14	E0CYG1_MOUSE,TM119_MOUSE	Transmembrane protein 119,Transmembrane protein 119	Tmem119,Tmem119	ENSMUST00000160374,ENSMUST00000067853	ENSMUSP00000124226,ENSMUSP00000070551	ENSMUSG00000054675,ENSMUSG00000054675	920.848	818.389	1023.31	0.322027	0.00508302	0.104747
ENSMUSG00000023845	chr17	17527723	17624489	-	Lnpep	protein_coding	Q8C129	LCAP_MOUSE	Leucyl-cystinyl aminopeptidase	Lnpep	ENSMUST00000041047	ENSMUSP00000036998	ENSMUSG00000023845	1571.81	1716.67	1426.95	-0.266513	0.00510461	0.104828
ENSMUSG00000027201	chr2	125084628	125123661	-	Myef2	protein_coding	A2ATP5,A2ATP6,F6XJA1,G8JL68	A2ATP5_MOUSE,A2ATP6_MOUSE,F6XJA1_MOUSE,G8JL68_MOUSE	Myelin expression factor 2,Myelin expression factor 2,Myelin expression factor 2,Myelin expression factor 2	Myef2,Myef2,Myef2,Myef2	ENSMUST00000147105,ENSMUST00000142718,ENSMUST00000137091,ENSMUST00000089825	ENSMUSP00000114817,ENSMUSP00000115519,ENSMUSP00000123222,ENSMUSP00000087258	ENSMUSG00000027201,ENSMUSG00000027201,ENSMUSG00000027201,ENSMUSG00000027201	2167.49	2351.56	1983.42	-0.245515	0.00511975	0.10494
ENSMUSG00000034023	chr6	113531682	113597017	+	Fancd2	protein_coding	F7CAP1,Q80V62 Q9CWC7	F7CAP1_MOUSE,FACD2_MOUSE	Fanconi anemia group D2 protein homolog,Fanconi anemia group D2 protein homolog	Fancd2,Fancd2	ENSMUST00000123738,ENSMUST00000036340 ENSMUST00000101051	ENSMUSP00000122091,ENSMUSP00000045667	ENSMUSG00000034023,ENSMUSG00000034023	568.335	643.202	493.468	-0.381635	0.00525828	0.107402
ENSMUSG00000105572	chr3	119727748	119729790	-	RP23-235E15,5	TEC								399.552	456.509	342.594	-0.413095	0.0052596	0.107402
ENSMUSG00000032621	chr13	103741615	103764504	-	Srek1	protein_coding	Q8BZX4 Q8BLM8 Q8BWK7 Q8BYK0 Q8BYZ4	SREK1_MOUSE	Splicing regulatory glutamine/lysine-rich protein 1	Srek1 Sfrs12 Srrp86	ENSMUST00000074616	ENSMUSP00000074196	ENSMUSG00000032621	4444.74	4732.96	4156.51	-0.187329	0.00527361	0.107487
ENSMUSG00000001211	chr10	78269178	78352489	-	Agpat3	protein_coding	D3YTN7,D3YUW0,D3YV65,D3Z1M6,Q9D517 Q7TT39 Q8BST2	D3YTN7_MOUSE,D3YUW0_MOUSE,D3YV65_MOUSE,D3Z1M6_MOUSE,PLCC_MOUSE	1-acyl-sn-glycerol-3-phosphate acyltransferase gamma,1-acyl-sn-glycerol-3-phosphate acyltransferase gamma,1-acyl-sn-glycerol-3-phosphate acyltransferase gamma,1-acyl-sn-glycerol-3-phosphate acyltransferase gamma,1-acyl-sn-glycerol-3-phosphate acyltransferase gamma	Agpat3,Agpat3,Agpat3,Agpat3,Agpat3	ENSMUST00000138035,ENSMUST00000150828,ENSMUST00000146899,ENSMUST00000139282,ENSMUST00000001240 ENSMUST00000105387 ENSMUST00000105388 ENSMUST00000105389 ENSMUST00000105390 ENSMUST00000166360	ENSMUSP00000121052,ENSMUSP00000114885,ENSMUSP00000114657,ENSMUSP00000119713,ENSMUSP00000001240	ENSMUSG00000001211,ENSMUSG00000001211,ENSMUSG00000001211,ENSMUSG00000001211,ENSMUSG00000001211	2988.16	2775.7	3200.62	0.20543	0.00531784	0.107891
ENSMUSG00000021327	chr13	21387013	21402755	-	Zkscan3	protein_coding	D3YTV4,F6VSC7,Q5RJ53,Q91VW9 Q3V3Z2 Q8CD81 Q9ESY5	D3YTV4_MOUSE,F6VSC7_MOUSE,Q5RJ53_MOUSE,ZKSC3_MOUSE	Zinc finger protein with KRAB and SCAN domains 3,Zinc finger protein with KRAB and SCAN domains 3,Zinc finger protein with KRAB and SCAN domains 3,Zinc finger protein with KRAB and SCAN domains 3	Zkscan3,Zkscan3,Zkscan3,Zkscan3 Skz1 Zfp306 Zfp307 Zfp47	ENSMUST00000117721,ENSMUST00000145631,ENSMUST00000116433,ENSMUST00000070785 ENSMUST00000116434	ENSMUSP00000112862,ENSMUSP00000118091,ENSMUSP00000112134,ENSMUSP00000068424	ENSMUSG00000021327,ENSMUSG00000021327,ENSMUSG00000021327,ENSMUSG00000021327	5519.22	5900.74	5137.69	-0.199742	0.00532319	0.107891
ENSMUSG00000036882	chr7	30522226	30534180	-	Arhgap33	protein_coding	Q80YF9 Q6P7W6	RHG33_MOUSE	Rho GTPase-activating protein 33	Arhgap33 Snx26 Tcgap	ENSMUST00000044338	ENSMUSP00000038412	ENSMUSG00000036882	1072.87	1175.14	970.596	-0.275631	0.00530491	0.107891
ENSMUSG00000001665	chr10	75774115	75781414	-	Gstt3	protein_coding	G3UX05,G3UX71,G3UYL6,Q99L20	G3UX05_MOUSE,G3UX71_MOUSE,G3UYL6_MOUSE,Q99L20_MOUSE	Protein Gstt3,Protein Gstt3,Protein Gstt3,Glutathione S-transferase theta 3 Glutathione S-transferase, theta 3 Protein Gstt3	Gstt3,Gstt3,Gstt3,Gstt3 mCG_5986	ENSMUST00000173537,ENSMUST00000174187,ENSMUST00000133869,ENSMUST00000001715	ENSMUSP00000133498,ENSMUSP00000133576,ENSMUSP00000134134,ENSMUSP00000001715	ENSMUSG00000001665,ENSMUSG00000001665,ENSMUSG00000001665,ENSMUSG00000001665	375.955	322.462	429.448	0.412242	0.00533929	0.10797
ENSMUSG00000032549	chr9	103111787	103185276	+	Rab6b	protein_coding	P61294	RAB6B_MOUSE	Ras-related protein Rab-6B	Rab6b D9Bwg0185e	ENSMUST00000035155	ENSMUSP00000035155	ENSMUSG00000032549	565.672	485.983	645.36	0.408466	0.00534691	0.10797
ENSMUSG00000041870	chr5	114774677	114806200	+	Ankrd13a	protein_coding	F7B209,Q80UP5 Q2VPQ7 Q6P7F2	F7B209_MOUSE,AN13A_MOUSE	Ankyrin repeat domain-containing protein 13A,Ankyrin repeat domain-containing protein 13A	Ankrd13a,Ankrd13a Ankrd13	ENSMUST00000137519,ENSMUST00000102578	ENSMUSP00000116994,ENSMUSP00000099638	ENSMUSG00000041870,ENSMUSG00000041870	7447.71	6975.69	7919.72	0.183089	0.00536225	0.108071
ENSMUSG00000045482	chr5	144767732	144859778	+	Trrap	protein_coding	D3YY11,E9PWT1,E9PZA7,E9QLK7,F7CGG2	D3YY11_MOUSE,E9PWT1_MOUSE,E9PZA7_MOUSE,E9QLK7_MOUSE,F7CGG2_MOUSE	Transformation/transcription domain-associated protein,Transformation/transcription domain-associated protein,Transformation/transcription domain-associated protein,Transformation/transcription domain-associated protein,Transformation/transcription domain-associated protein	Trrap,Trrap,Trrap,Trrap,Trrap	ENSMUST00000128550,ENSMUST00000094120,ENSMUST00000038980,ENSMUST00000100467,ENSMUST00000132925	ENSMUSP00000115917,ENSMUSP00000091668,ENSMUSP00000042544,ENSMUSP00000098035,ENSMUSP00000122021	ENSMUSG00000045482,ENSMUSG00000045482,ENSMUSG00000045482,ENSMUSG00000045482,ENSMUSG00000045482	5499.34	5912.51	5086.17	-0.217152	0.00538024	0.108071
ENSMUSG00000050213	chr4	125066672	125074042	+	Snip1	protein_coding	Q8BIZ6 Q3V106 Q8BIZ4	SNIP1_MOUSE	Smad nuclear-interacting protein 1	Snip1	ENSMUST00000052183	ENSMUSP00000060721	ENSMUSG00000050213	725.052	646.864	803.239	0.311933	0.0053817	0.108071
ENSMUSG00000015932	chr2	143915320	143943324	+	Dstn	protein_coding	Q9R0P5	DEST_MOUSE	Destrin	Dstn Dsn Sid23	ENSMUST00000103172	ENSMUSP00000099461	ENSMUSG00000015932	10972.5	10331.3	11613.7	0.168795	0.00540746	0.108189
ENSMUSG00000057738	chr2	29965560	30031451	+	Sptan1	protein_coding	A3KGU4,A3KGU5,A3KGU7,A3KGU9,E9Q447,P16546 A3KGU6 A3KGU8 Q8K380 Q9CT05	A3KGU4_MOUSE,A3KGU5_MOUSE,A3KGU7_MOUSE,A3KGU9_MOUSE,E9Q447_MOUSE,SPTN1_MOUSE	Spectrin alpha chain, non-erythrocytic 1,Spectrin alpha chain, non-erythrocytic 1,Spectrin alpha chain, non-erythrocytic 1,Spectrin alpha chain, non-erythrocytic 1,Spectrin alpha chain, non-erythrocytic 1,Spectrin alpha chain, non-erythrocytic 1	Sptan1 Spna2,Sptan1 Spna2,Sptan1 Spna2,Sptan1 Spna2,Sptan1 Spna2,Sptan1 Spna2 Spta2	ENSMUST00000113741,ENSMUST00000113717,ENSMUST00000100225,ENSMUST00000129241,ENSMUST00000113719,ENSMUST00000046257 ENSMUST00000095083	ENSMUSP00000109370,ENSMUSP00000109346,ENSMUSP00000097797,ENSMUSP00000121116,ENSMUSP00000109348,ENSMUSP00000047792	ENSMUSG00000057738,ENSMUSG00000057738,ENSMUSG00000057738,ENSMUSG00000057738,ENSMUSG00000057738,ENSMUSG00000057738	15310.8	14501.3	16120.2	0.152676	0.00539935	0.108189
ENSMUSG00000042508	chr5	9118801	9161776	-	Dmtf1	protein_coding	Q8CE22 P70413 Q3TUR9 Q80VR8 Q8BQX6 Q8CA56 Q8CCZ0,V9GWT2,V9GWW5,V9GX14,V9GX59,V9GXK4,V9GXV6,V9GXX1	DMTF1_MOUSE,V9GWT2_MOUSE,V9GWW5_MOUSE,V9GX14_MOUSE,V9GX59_MOUSE,V9GXK4_MOUSE,V9GXV6_MOUSE,V9GXX1_MOUSE	Cyclin-D-binding Myb-like transcription factor 1,Cyclin-D-binding Myb-like transcription factor 1,Cyclin-D-binding Myb-like transcription factor 1,Cyclin-D-binding Myb-like transcription factor 1,Cyclin-D-binding Myb-like transcription factor 1,Cyclin-D-binding Myb-like transcription factor 1,Cyclin-D-binding Myb-like transcription factor 1,Cyclin-D-binding Myb-like transcription factor 1	Dmtf1 Dmp1,Dmtf1,Dmtf1,Dmtf1,Dmtf1,Dmtf1,Dmtf1,Dmtf1	ENSMUST00000071921 ENSMUST00000095017 ENSMUST00000183448 ENSMUST00000184159 ENSMUST00000184401 ENSMUST00000184888,ENSMUST00000184620,ENSMUST00000184120,ENSMUST00000184370,ENSMUST00000185100,ENSMUST00000184372,ENSMUST00000183525,ENSMUST00000183973	ENSMUSP00000071815,ENSMUSP00000138816,ENSMUSP00000138861,ENSMUSP00000138935,ENSMUSP00000138997,ENSMUSP00000139191,ENSMUSP00000139339,ENSMUSP00000139361	ENSMUSG00000042508,ENSMUSG00000042508,ENSMUSG00000042508,ENSMUSG00000042508,ENSMUSG00000042508,ENSMUSG00000042508,ENSMUSG00000042508,ENSMUSG00000042508	3523.89	3772	3275.78	-0.203434	0.00544429	0.108726
ENSMUSG00000025912	chr1	9667415	9700209	-	Mybl1	protein_coding	E9QLX9,P51960	E9QLX9_MOUSE,MYBA_MOUSE	Myb-related protein A,Myb-related protein A	Mybl1,Mybl1 Amyb	ENSMUST00000115468,ENSMUST00000088658	ENSMUSP00000111128,ENSMUSP00000086034	ENSMUSG00000025912,ENSMUSG00000025912	500.922	568.709	433.135	-0.392082	0.00549972	0.10942
ENSMUSG00000028776	chr4	130164454	130175122	-	Tinagl1	protein_coding	H3BJ97,H3BKM8,Q99JR5 Q9EQT9	H3BJ97_MOUSE,H3BKM8_MOUSE,TINAL_MOUSE	Tubulointerstitial nephritis antigen-like,Tubulointerstitial nephritis antigen-like,Tubulointerstitial nephritis antigen-like	Tinagl1,Tinagl1,Tinagl1 Arg1 Lcn7 Tinagl	ENSMUST00000175992,ENSMUST00000132545,ENSMUST00000030560 ENSMUST00000105998 ENSMUST00000105999	ENSMUSP00000134900,ENSMUSP00000135453,ENSMUSP00000030560	ENSMUSG00000028776,ENSMUSG00000028776,ENSMUSG00000028776	3305.93	2791.25	3820.62	0.452754	0.00548962	0.10942
ENSMUSG00000029202	chr5	65605721	65698273	-	Pds5a	protein_coding	E9QPI5	E9QPI5_MOUSE	Sister chromatid cohesion protein PDS5 homolog A	Pds5a	ENSMUST00000031104	ENSMUSP00000031104	ENSMUSG00000029202	5608.27	5959.45	5257.09	-0.180882	0.00550921	0.10942
ENSMUSG00000023951	chr17	46016993	46032377	-	Vegfa	protein_coding	E9Q4N8,E9Q4N9,F6ZE01,F8WH10,F8WH81,Q00731 O70123 Q66S31 Q6GT23 Q6WZL9	E9Q4N8_MOUSE,E9Q4N9_MOUSE,F6ZE01_MOUSE,F8WH10_MOUSE,F8WH81_MOUSE,VEGFA_MOUSE	Vascular endothelial growth factor A,Vascular endothelial growth factor A,Vascular endothelial growth factor A,Vascular endothelial growth factor A,Vascular endothelial growth factor A,Vascular endothelial growth factor A	Vegfa,Vegfa,Vegfa,Vegfa,Vegfa,Vegfa Vegf	ENSMUST00000113520,ENSMUST00000113519,ENSMUST00000167860,ENSMUST00000071648,ENSMUST00000142351,ENSMUST00000024747	ENSMUSP00000109148,ENSMUSP00000109147,ENSMUSP00000131901,ENSMUSP00000071575,ENSMUSP00000115883,ENSMUSP00000024747	ENSMUSG00000023951,ENSMUSG00000023951,ENSMUSG00000023951,ENSMUSG00000023951,ENSMUSG00000023951,ENSMUSG00000023951	14401.6	13554.3	15249	0.169948	0.00562315	0.111332
ENSMUSG00000026674	chr1	169972307	170110762	-	Ddr2	protein_coding	Q62371 B2RSD7	DDR2_MOUSE	Discoidin domain-containing receptor 2	Ddr2 Ntrkr3 Tkt Tyro10	ENSMUST00000027985 ENSMUST00000170800	ENSMUSP00000027985	ENSMUSG00000026674	3816.58	4068.07	3565.09	-0.190356	0.00562593	0.111332
ENSMUSG00000035944	chr15	85832306	85858822	+	Ttc38	protein_coding	A3KMP2 Q05C02 Q05CK3 Q3UZU5,D6RH59	TTC38_MOUSE,D6RH59_MOUSE	Tetratricopeptide repeat protein 38,Tetratricopeptide repeat protein 38	Ttc38,Ttc38	ENSMUST00000146088,ENSMUST00000124011	ENSMUSP00000114504,ENSMUSP00000118863	ENSMUSG00000035944,ENSMUSG00000035944	536.159	467.097	605.221	0.373036	0.00563899	0.111388
ENSMUSG00000055240	chr17	33360507	33394641	-	Zfp101	protein_coding	G3UXY5,G3UZE0,Q8BP18	G3UXY5_MOUSE,G3UZE0_MOUSE,Q8BP18_MOUSE	Protein Zfp101,Protein Zfp101,Protein Zfp101	Zfp101,Zfp101,Zfp101	ENSMUST00000174512,ENSMUST00000174417,ENSMUST00000167107	ENSMUSP00000133873,ENSMUSP00000134459,ENSMUSP00000132508	ENSMUSG00000055240,ENSMUSG00000055240,ENSMUSG00000055240	2467.3	2665.5	2269.09	-0.232197	0.00567924	0.11198
ENSMUSG00000034659	chr19	10870660	10882001	-	Tmem109	protein_coding	D3YX08,D3Z0I8,D3Z3Z2,D3Z7P2,Q3UBX0 Q8R006	D3YX08_MOUSE,D3Z0I8_MOUSE,D3Z3Z2_MOUSE,D3Z7P2_MOUSE,TM109_MOUSE	Transmembrane protein 109,Transmembrane protein 109,Transmembrane protein 109,Transmembrane protein 109,Transmembrane protein 109	Tmem109,Tmem109,Tmem109,Tmem109,Tmem109	ENSMUST00000147699,ENSMUST00000133303,ENSMUST00000144681,ENSMUST00000128835,ENSMUST00000038128	ENSMUSP00000120662,ENSMUSP00000120261,ENSMUSP00000116750,ENSMUSP00000122130,ENSMUSP00000039529	ENSMUSG00000034659,ENSMUSG00000034659,ENSMUSG00000034659,ENSMUSG00000034659,ENSMUSG00000034659	2289.95	2118.88	2461.02	0.215861	0.005726	0.112698
ENSMUSG00000000489	chr15	79995900	80014808	-	Pdgfb	protein_coding	P31240 Q6P3C4	PDGFB_MOUSE	Platelet-derived growth factor subunit B	Pdgfb Sis	ENSMUST00000000500	ENSMUSP00000000500	ENSMUSG00000000489	1734	1584.46	1883.55	0.249326	0.00576726	0.113305
ENSMUSG00000016494	chr1	194938819	194961279	+	Cd34	protein_coding	Q64314 Q62550 Q62551	CD34_MOUSE	Hematopoietic progenitor cell antigen CD34	Cd34	ENSMUST00000016638 ENSMUST00000110815	ENSMUSP00000016638	ENSMUSG00000016494	7949.59	7472.27	8426.92	0.173437	0.00580276	0.113602
ENSMUSG00000022816	chr16	37776873	37836514	+	Fstl1	protein_coding	Q62356 Q6GTX2 Q99JI9	FSTL1_MOUSE	Follistatin-related protein 1	Fstl1 Frp Fstl Tsc36	ENSMUST00000114763	ENSMUSP00000110411	ENSMUSG00000022816	28820.2	27340.8	30299.6	0.148237	0.00582948	0.113602
ENSMUSG00000023940	chr17	53674786	53689333	-	Sgol1	protein_coding	Q9CXH7 Q3U4K4 Q588H1 Q8BKW2	SGOL1_MOUSE	Shugoshin-like 1	Sgol1 Sgo1	ENSMUST00000024736	ENSMUSP00000024736	ENSMUSG00000023940	1013.41	1112.21	914.615	-0.281918	0.00583459	0.113602
ENSMUSG00000036913	chr8	124793019	124834713	+	Trim67	protein_coding	Q505D9	TRI67_MOUSE	Tripartite motif-containing protein 67	Trim67	ENSMUST00000041106 ENSMUST00000167588	ENSMUSP00000040601	ENSMUSG00000036913	463.245	400.903	525.587	0.389826	0.0058218	0.113602
ENSMUSG00000054008	chr18	60685978	60713389	-	Ndst1	protein_coding	Q3UHN9 O70353 Q3TBX3 Q3TDS3 Q8BZE5 Q9R206	NDST1_MOUSE	Bifunctional heparan sulfate N-deacetylase/N-sulfotransferase 1	Ndst1	ENSMUST00000169273	ENSMUSP00000126623	ENSMUSG00000054008	6851.67	6433.59	7269.76	0.176258	0.00583388	0.113602
ENSMUSG00000054889	chr13	38151328	38198577	+	Dsp	protein_coding	E9PZW0,E9Q557	E9PZW0_MOUSE,DESP_MOUSE	Desmoplakin,Desmoplakin	Dsp,Dsp	ENSMUST00000127906,ENSMUST00000124830	ENSMUSP00000117252,ENSMUSP00000115062	ENSMUSG00000054889,ENSMUSG00000054889	2445.28	2259.94	2630.62	0.219028	0.00588196	0.11432
ENSMUSG00000017707	chr2	163623272	163645131	-	Serinc3	protein_coding	Q9QZI9 Q3U7C6 Q62310 Q8BSP9 Q8CFD3 Q91VN9	SERC3_MOUSE	Serine incorporator 3	Serinc3 Aigp1 Diff33 Tde1 Tms1	ENSMUST00000017851	ENSMUSP00000017851	ENSMUSG00000017707	12056.4	11363.4	12749.4	0.166019	0.00591413	0.114536
ENSMUSG00000035504	chr10	80329953	80336441	+	Reep6	protein_coding	D3YTR1,D3YTR2,D3Z6V2,Q9JM62 Q8K0X2	D3YTR1_MOUSE,D3YTR2_MOUSE,D3Z6V2_MOUSE,REEP6_MOUSE	Receptor expression-enhancing protein 6,Receptor expression-enhancing protein 6,Receptor expression-enhancing protein 6,Receptor expression-enhancing protein 6	Reep6,Reep6,Reep6,Reep6 Dp1l1 Tb2l1	ENSMUST00000105358,ENSMUST00000105357,ENSMUST00000040081,ENSMUST00000105354 ENSMUST00000105355	ENSMUSP00000100995,ENSMUSP00000100994,ENSMUSP00000043722,ENSMUSP00000100991	ENSMUSG00000035504,ENSMUSG00000035504,ENSMUSG00000035504,ENSMUSG00000035504	366.861	313.217	420.505	0.423788	0.00590863	0.114536
ENSMUSG00000028413	chr4	40804602	40854005	-	B4galt1	protein_coding	B1AXY5,P15535	B1AXY5_MOUSE,B4GT1_MOUSE	Beta-1,4-galactosyltransferase 1 UDP-Gal:betaGlcNAc beta 1,4-galactosyltransferase, polypeptide 1, isoform CRA_a,Beta-1,4-galactosyltransferase 1	B4galt1 mCG_9808,B4galt1 Ggtb Ggtb2	ENSMUST00000108096,ENSMUST00000030121	ENSMUSP00000103731,ENSMUSP00000030121	ENSMUSG00000028413,ENSMUSG00000028413	5850.16	5466.38	6233.94	0.189527	0.00593387	0.114609
ENSMUSG00000071757	chr15	57694665	57839832	+	Zhx2	protein_coding	Q8C0C0	ZHX2_MOUSE	Zinc fingers and homeoboxes protein 2	Zhx2 Afr1 Raf	ENSMUST00000096430	ENSMUSP00000094164	ENSMUSG00000071757	537.222	472.17	602.275	0.350457	0.00593896	0.114609
ENSMUSG00000014498	chr10	128377115	128408704	+	Ankrd52	protein_coding	F7BT68,Q8BTI7 Q148Z3	F7BT68_MOUSE,ANR52_MOUSE	Serine/threonine-protein phosphatase 6 regulatory ankyrin repeat subunit C,Serine/threonine-protein phosphatase 6 regulatory ankyrin repeat subunit C	Ankrd52,Ankrd52	ENSMUST00000166577,ENSMUST00000014642	ENSMUSP00000128794,ENSMUSP00000014642	ENSMUSG00000014498,ENSMUSG00000014498	3311.42	3582.43	3040.42	-0.236596	0.00598846	0.114953
ENSMUSG00000027339	chr2	131989415	132030258	-	Rassf2	protein_coding	A2APB1,A2AVI0,Q8BMS9 Q6A0B2	A2APB1_MOUSE,A2AVI0_MOUSE,RASF2_MOUSE	Ras association domain-containing protein 2,Ras association domain-containing protein 2,Ras association domain-containing protein 2	Rassf2,Rassf2,Rassf2 Kiaa0168	ENSMUST00000139047,ENSMUST00000140791,ENSMUST00000028814 ENSMUST00000103182	ENSMUSP00000120194,ENSMUSP00000117619,ENSMUSP00000028814	ENSMUSG00000027339,ENSMUSG00000027339,ENSMUSG00000027339	1771.65	1633.95	1909.35	0.22459	0.00597776	0.114953
ENSMUSG00000086266	chr7	142659693	142670356	+	Igf2os	antisense								397.587	457.734	337.44	-0.438757	0.00597895	0.114953
ENSMUSG00000020173	chr11	12236608	12464960	-	Cobl	protein_coding	F6RR81,F6ZEZ1,G3UWP1,G3UWY3,G3UZ73,G5E8P4,Q5NBX1 Q5NBX2 Q60859 Q6PAT4 Q7TQM9 Q80TV4 Q8C7Q0 Q8CE81 Q8CIM4	F6RR81_MOUSE,F6ZEZ1_MOUSE,G3UWP1_MOUSE,G3UWY3_MOUSE,G3UZ73_MOUSE,G5E8P4_MOUSE,COBL_MOUSE	Protein cordon-bleu,Protein cordon-bleu,Protein cordon-bleu,Protein cordon-bleu,Protein cordon-bleu,Protein cordon-bleu,Protein cordon-bleu	Cobl,Cobl,Cobl,Cobl,Cobl,Cobl,Cobl Kiaa0633	ENSMUST00000146067,ENSMUST00000136549,ENSMUST00000172827,ENSMUST00000174874,ENSMUST00000172956,ENSMUST00000109651,ENSMUST00000046755 ENSMUST00000109650 ENSMUST00000172919	ENSMUSP00000119008,ENSMUSP00000114779,ENSMUSP00000133368,ENSMUSP00000133470,ENSMUSP00000134372,ENSMUSP00000105278,ENSMUSP00000045693	ENSMUSG00000020173,ENSMUSG00000020173,ENSMUSG00000020173,ENSMUSG00000020173,ENSMUSG00000020173,ENSMUSG00000020173,ENSMUSG00000020173	1131.45	1029.55	1233.34	0.260324	0.00603545	0.115319
ENSMUSG00000029922	chr6	39397804	39420462	-	Mkrn1	protein_coding	E9QAG7,F6QJX8,F6S742,F6WPC3,Q8C5V4,Q99LD7,Q9QXP6	E9QAG7_MOUSE,F6QJX8_MOUSE,F6S742_MOUSE,F6WPC3_MOUSE,Q8C5V4_MOUSE,Q99LD7_MOUSE,MKRN1_MOUSE	E3 ubiquitin-protein ligase makorin-1,E3 ubiquitin-protein ligase makorin-1,E3 ubiquitin-protein ligase makorin-1,E3 ubiquitin-protein ligase makorin-1,E3 ubiquitin-protein ligase makorin-1,E3 ubiquitin-protein ligase makorin-1 Makorin, ring finger protein, 1, isoform CRA_b Mkrn1 protein,E3 ubiquitin-protein ligase makorin-1	Mkrn1,Mkrn1,Mkrn1,Mkrn1,Mkrn1,Mkrn1 mCG_4672,Mkrn1	ENSMUST00000114823,ENSMUST00000150575,ENSMUST00000122996,ENSMUST00000146785,ENSMUST00000031985,ENSMUST00000051671,ENSMUST00000114822	ENSMUSP00000110471,ENSMUSP00000121563,ENSMUSP00000115231,ENSMUSP00000123440,ENSMUSP00000031985,ENSMUSP00000084244,ENSMUSP00000110470	ENSMUSG00000029922,ENSMUSG00000029922,ENSMUSG00000029922,ENSMUSG00000029922,ENSMUSG00000029922,ENSMUSG00000029922,ENSMUSG00000029922	1562.6	1428.65	1696.55	0.247793	0.00602621	0.115319
ENSMUSG00000034771	chr10	81574561	81590845	+	Tle2	protein_coding	D3Z0X0,D3Z1A4,D3Z2J7,E9PV07,F6X5U5,F6YM15,Q3UN01,Q9WVB2	D3Z0X0_MOUSE,D3Z1A4_MOUSE,D3Z2J7_MOUSE,E9PV07_MOUSE,F6X5U5_MOUSE,F6YM15_MOUSE,Q3UN01_MOUSE,TLE2_MOUSE	Transducin-like enhancer protein 2,Transducin-like enhancer protein 2,Transducin-like enhancer protein 2,Transducin-like enhancer protein 2,Transducin-like enhancer protein 2,Transducin-like enhancer protein 2,Transducin-like enhancer protein 2,Transducin-like enhancer protein 2	Tle2,Tle2,Tle2,Tle2,Tle2,Tle2,Tle2,Tle2 Grg2	ENSMUST00000131794,ENSMUST00000143285,ENSMUST00000136341,ENSMUST00000146916,ENSMUST00000124854,ENSMUST00000131411,ENSMUST00000135211,ENSMUST00000146358	ENSMUSP00000120218,ENSMUSP00000122074,ENSMUSP00000121585,ENSMUSP00000121173,ENSMUSP00000118334,ENSMUSP00000114400,ENSMUSP00000117453,ENSMUSP00000121125	ENSMUSG00000034771,ENSMUSG00000034771,ENSMUSG00000034771,ENSMUSG00000034771,ENSMUSG00000034771,ENSMUSG00000034771,ENSMUSG00000034771,ENSMUSG00000034771	2756.97	2947.61	2566.32	-0.199774	0.00604989	0.115319
ENSMUSG00000035597	chr12	65036333	65063386	+	Prpf39	protein_coding	D6RDR5,E9QJV4	D6RDR5_MOUSE,E9QJV4_MOUSE	Pre-mRNA-processing factor 39,Pre-mRNA-processing factor 39	Prpf39,Prpf39	ENSMUST00000129956,ENSMUST00000120580	ENSMUSP00000114713,ENSMUSP00000112953	ENSMUSG00000035597,ENSMUSG00000035597	4529.66	4844.02	4215.31	-0.200521	0.0060478	0.115319
ENSMUSG00000029810	chr6	48833811	48841374	-	Tmem176b	protein_coding	Q9R1Q6 Q9WU52	T176B_MOUSE	Transmembrane protein 176B	Tmem176b Clast1 Lr8	ENSMUST00000101429 ENSMUST00000164733 ENSMUST00000166247	ENSMUSP00000098972	ENSMUSG00000029810	4783.1	4475.33	5090.87	0.185879	0.00609141	0.115907
ENSMUSG00000041459	chr4	148612382	148627019	-	Tardbp	protein_coding	H3BJV1,Q6VYI4,Q6VYI5,Q8BLD4,Q8R0B4,Q921F2 Q3U591 Q3V0E7	H3BJV1_MOUSE,Q6VYI4_MOUSE,Q6VYI5_MOUSE,Q8BLD4_MOUSE,Q8R0B4_MOUSE,TADBP_MOUSE	TAR DNA-binding protein 43,TAR DNA-binding protein 43 TARDBP S9,TAR DNA-binding protein 43 TARDBP S8,MCG16669, isoform CRA_f TAR DNA-binding protein 43 TARDBP S7 TDP-43 variant 5,MCG16669, isoform CRA_a TAR DNA binding protein TAR DNA-binding protein 43 TARDBP S6,TAR DNA-binding protein 43	Tardbp,Tardbp TARDBP,Tardbp TARDBP,Tardbp TARDBP mCG_16669,Tardbp TARDBP mCG_16669,Tardbp Tdp43	ENSMUST00000140897,ENSMUST00000095719 ENSMUST00000172073,ENSMUST00000105700 ENSMUST00000105702,ENSMUST00000045180 ENSMUST00000165113,ENSMUST00000105699,ENSMUST00000084125	ENSMUSP00000135135,ENSMUSP00000093386,ENSMUSP00000101325,ENSMUSP00000038113,ENSMUSP00000101324,ENSMUSP00000081142	ENSMUSG00000041459,ENSMUSG00000041459,ENSMUSG00000041459,ENSMUSG00000041459,ENSMUSG00000041459,ENSMUSG00000041459	15298.2	16145	14451.4	-0.159871	0.00610777	0.116016
ENSMUSG00000024812	chr19	24094523	24225026	-	Tjp2	protein_coding	Q9Z0U1 Q8K210	ZO2_MOUSE	Tight junction protein ZO-2	Tjp2 Zo2	ENSMUST00000099558	ENSMUSP00000097154	ENSMUSG00000024812	3068.89	2862.87	3274.92	0.19393	0.0061304	0.116243
ENSMUSG00000042766	chr3	89234177	89246309	-	Trim46	protein_coding	D3YXA6,D3YYF9,E9PUI3,Q3TC52,Q7TNM2 Q60717 Q6P1I9	D3YXA6_MOUSE,D3YYF9_MOUSE,E9PUI3_MOUSE,Q3TC52_MOUSE,TRI46_MOUSE	Tripartite motif-containing protein 46,Tripartite motif-containing protein 46,Tripartite motif-containing protein 46,Tripartite motif-containing protein 46,Tripartite motif-containing protein 46	Trim46,Trim46,Trim46,Trim46,Trim46 Trific	ENSMUST00000107464,ENSMUST00000125952,ENSMUST00000143637,ENSMUST00000090924,ENSMUST00000041022	ENSMUSP00000103088,ENSMUSP00000123533,ENSMUSP00000119270,ENSMUSP00000088442,ENSMUSP00000036053	ENSMUSG00000042766,ENSMUSG00000042766,ENSMUSG00000042766,ENSMUSG00000042766,ENSMUSG00000042766	349.307	403.701	294.914	-0.451678	0.00614405	0.116299
ENSMUSG00000022097	chr14	70520941	70524081	-	Sftpc	protein_coding	Q6P8P8	Q6P8P8_MOUSE	Pulmonary surfactant-associated protein C Surfactant associated protein C	Sftpc mCG_16186	ENSMUST00000022692	ENSMUSP00000022692	ENSMUSG00000022097	125267	107687	142846	0.407618	0.00618836	0.116732
ENSMUSG00000071711	chr15	78406712	78414002	+	Mpst	protein_coding	Q3UW66	Q3UW66_MOUSE	3-mercaptopyruvate sulfurtransferase	Mpst	ENSMUST00000043865 ENSMUST00000167140 ENSMUST00000169133	ENSMUSP00000043061	ENSMUSG00000071711	1498.11	1365.24	1630.98	0.256413	0.00618041	0.116732
ENSMUSG00000018932	chr11	60932033	60952811	+	Map2k3	protein_coding	O09110 P97293 Q91VX1	MP2K3_MOUSE	Dual specificity mitogen-activated protein kinase kinase 3	Map2k3 Mkk3 Prkmk3	ENSMUST00000019076 ENSMUST00000130269	ENSMUSP00000019076	ENSMUSG00000018932	1722.24	1586.71	1857.76	0.227395	0.00624534	0.117602
ENSMUSG00000034957	chr7	35119293	35121926	+	Cebpa	protein_coding	P53566 Q91XB6	CEBPA_MOUSE	CCAAT/enhancer-binding protein alpha	Cebpa	ENSMUST00000042985	ENSMUSP00000096129	ENSMUSG00000034957	1729.18	1569.59	1888.76	0.266896	0.00634478	0.119269
ENSMUSG00000067928	chr17	21707741	21725636	+	Zfp760	protein_coding	E9QAF5	E9QAF5_MOUSE	Protein Zfp760	Zfp760	ENSMUST00000073312	ENSMUSP00000073038	ENSMUSG00000067928	1828.14	1968.15	1688.12	-0.221298	0.00643335	0.120725
ENSMUSG00000028128	chr3	121723537	121735048	+	F3	protein_coding	P20352	TF_MOUSE	Tissue factor	F3 Cf-3 Cf3	ENSMUST00000029771	ENSMUSP00000029771	ENSMUSG00000028128	994.78	886.846	1102.71	0.313983	0.00645852	0.120887
ENSMUSG00000031987	chr8	124908596	124949254	-	Egln1	protein_coding	Q91YE3 Q8VHJ2 Q922P3	EGLN1_MOUSE	Egl nine homolog 1	Egln1	ENSMUST00000034469	ENSMUSP00000034469	ENSMUSG00000031987	2252.81	2088.36	2417.26	0.210908	0.00646421	0.120887
ENSMUSG00000054808	chr7	28893248	28962340	-	Actn4	protein_coding	D3Z0L8,D3Z761,E9Q2W9,P57780	D3Z0L8_MOUSE,D3Z761_MOUSE,E9Q2W9_MOUSE,ACTN4_MOUSE	Alpha-actinin-4,Alpha-actinin-4,Alpha-actinin-4,Alpha-actinin-4	Actn4,Actn4,Actn4,Actn4	ENSMUST00000140622,ENSMUST00000148196,ENSMUST00000127210,ENSMUST00000068045	ENSMUSP00000123210,ENSMUSP00000122268,ENSMUSP00000115436,ENSMUSP00000066068	ENSMUSG00000054808,ENSMUSG00000054808,ENSMUSG00000054808,ENSMUSG00000054808	10139.7	9591.58	10687.8	0.156115	0.0064917	0.121193
ENSMUSG00000002266	chr7	6675443	6696450	-	Zim1	protein_coding	Q8C393	Q8C393_MOUSE	Protein Zim1 Zinc finger, imprinted 1, isoform CRA_b	Zim1 mCG_23721	ENSMUST00000002336 ENSMUST00000122432	ENSMUSP00000002336	ENSMUSG00000002266	587.244	669.113	505.375	-0.404199	0.00650529	0.121239
ENSMUSG00000008035	chrX	10715013	10719690	+	Mid1ip1	protein_coding	F6XIS3,F7D5Q6,Q9CQ20 Q8BHT5	F6XIS3_MOUSE,F7D5Q6_MOUSE,M1IP1_MOUSE	Mid1-interacting protein 1,Mid1-interacting protein 1,Mid1-interacting protein 1	Mid1ip1,Mid1ip1,Mid1ip1 Mig12	ENSMUST00000156321,ENSMUST00000144356,ENSMUST00000008179 ENSMUST00000115524	ENSMUSP00000120996,ENSMUSP00000122463,ENSMUSP00000008179	ENSMUSG00000008035,ENSMUSG00000008035,ENSMUSG00000008035	1901.64	1753.33	2049.96	0.225376	0.00655479	0.121672
ENSMUSG00000024772	chr19	6276725	6300096	+	Ehd1	protein_coding	Q9WVK4	EHD1_MOUSE	EH domain-containing protein 1	Ehd1 Past1	ENSMUST00000025684	ENSMUSP00000025684	ENSMUSG00000024772	2751.13	2560.48	2941.77	0.200201	0.00654417	0.121672
ENSMUSG00000042707	chr4	125055338	125065703	-	Dnali1	protein_coding	Q8BVN8	IDLC_MOUSE	Axonemal dynein light intermediate polypeptide 1	Dnali1	ENSMUST00000036383	ENSMUSP00000047783	ENSMUSG00000042707	341.006	287.343	394.668	0.456505	0.00658196	0.121672
ENSMUSG00000053560	chr8	84661331	84662852	-	Ier2	protein_coding	P17950 Q3TD12 Q64251 Q8BME8 Q99M25	IER2_MOUSE	Immediate early response gene 2 protein	Ier2	ENSMUST00000060427	ENSMUSP00000060275	ENSMUSG00000053560	995.79	899.179	1092.4	0.280536	0.00657257	0.121672
ENSMUSG00000056708	chr1	155096361	155099636	-	Ier5	protein_coding	O89113 Q8CGI0	IER5_MOUSE	Immediate early response gene 5 protein	Ier5	ENSMUST00000055322	ENSMUSP00000056948	ENSMUSG00000056708	1104.67	998.259	1211.07	0.278546	0.00658444	0.121672
ENSMUSG00000039953	chr4	149586468	149648899	+	Clstn1	protein_coding	Q9EPL2 A2A800 B2KFP1 B2KFP2 Q69ZV9 Q7TS67 Q8K103	CSTN1_MOUSE	Calsyntenin-1	Clstn1 Cs1 Cstn1 Kiaa0911	ENSMUST00000039144 ENSMUST00000105691	ENSMUSP00000036962	ENSMUSG00000039953	4493.02	4220.11	4765.93	0.175438	0.00660359	0.121819
ENSMUSG00000025885	chr18	74440936	74771493	+	Myo5b	protein_coding	D3Z135,G3X9Y9,G5E8G6,H3BLK6	D3Z135_MOUSE,G3X9Y9_MOUSE,G5E8G6_MOUSE,H3BLK6_MOUSE	Unconventional myosin-Vb,Myosin Vb, isoform CRA_a Unconventional myosin-Vb,Myosin Vb, isoform CRA_c Unconventional myosin-Vb,Unconventional myosin-Vb	Myo5b,Myo5b mCG_123286,Myo5b mCG_123286,Myo5b	ENSMUST00000125882,ENSMUST00000121875,ENSMUST00000074157,ENSMUST00000177366	ENSMUSP00000123123,ENSMUSP00000112728,ENSMUSP00000073790,ENSMUSP00000135825	ENSMUSG00000025885,ENSMUSG00000025885,ENSMUSG00000025885,ENSMUSG00000025885	1509.68	1380.2	1639.16	0.247914	0.00662809	0.122065
ENSMUSG00000013160	chr8	105524465	105566047	-	Atp6v0d1	protein_coding	P51863 Q54A57 Q9QWJ2	VA0D1_MOUSE	V-type proton ATPase subunit d 1	Atp6v0d1 Atp6d	ENSMUST00000013304	ENSMUSP00000013304	ENSMUSG00000013160	2211.02	2042.64	2379.39	0.220056	0.00664349	0.122142
ENSMUSG00000028289	chr4	28813131	28967499	+	Epha7	protein_coding	A2BDQ4,Q61772 Q61505 Q61773 Q61774 Q8BSU8	A2BDQ4_MOUSE,EPHA7_MOUSE	Eph receptor A7, isoform CRA_b Ephrin type-A receptor 7,Ephrin type-A receptor 7	Epha7 mCG_14600,Epha7 Ebk Ehk3 Mdk1	ENSMUST00000108191,ENSMUST00000029964 ENSMUST00000080934 ENSMUST00000108194	ENSMUSP00000103826,ENSMUSP00000029964	ENSMUSG00000028289,ENSMUSG00000028289	1495.59	1639.26	1351.92	-0.277846	0.0067182	0.123123
ENSMUSG00000044197	chr5	139377697	139396415	+	Gpr146	protein_coding	D3Z262,Q99LE2 Q3U3K8 Q3U421 Q8BHR6 Q8BHU4	D3Z262_MOUSE,GP146_MOUSE	Probable G-protein-coupled receptor 146,Probable G-protein coupled receptor 146	Gpr146,Gpr146	ENSMUST00000138631,ENSMUST00000051293 ENSMUST00000100514	ENSMUSP00000119464,ENSMUSP00000049707	ENSMUSG00000044197,ENSMUSG00000044197	569.072	498.314	639.831	0.359998	0.00671953	0.123123
ENSMUSG00000039976	chr11	119143045	119228499	-	Tbc1d16	protein_coding	A2ABG4,A2AFK9	A2ABG4_MOUSE,A2AFK9_MOUSE	Protein Tbc1d16,Protein Tbc1d16	Tbc1d16,Tbc1d16	ENSMUST00000036113,ENSMUST00000125856	ENSMUSP00000048516,ENSMUSP00000119431	ENSMUSG00000039976,ENSMUSG00000039976	4349.1	4082.35	4615.85	0.177155	0.00675258	0.123521
ENSMUSG00000024661	chr19	9982703	9985092	+	Fth1	protein_coding	P09528 Q3UI44	FRIH_MOUSE	Ferritin heavy chain	Fth1 Fth	ENSMUST00000025563	ENSMUSP00000025563	ENSMUSG00000024661	11271.3	10559.7	11982.8	0.182379	0.00681722	0.124188
ENSMUSG00000027360	chr2	126593667	126619299	-	Hdc	protein_coding	P23738 Q9QWU3	DCHS_MOUSE	Histidine decarboxylase	Hdc	ENSMUST00000028838	ENSMUSP00000028838	ENSMUSG00000027360	504.938	440.639	569.236	0.368692	0.00680207	0.124188
ENSMUSG00000041064	chr9	65587160	65595967	+	Pif1	protein_coding	D3YZ87,D6RFC6,Q80SX8 Q80W44 Q8BIZ3 Q8BJ72	D3YZ87_MOUSE,D6RFC6_MOUSE,PIF1_MOUSE	ATP-dependent DNA helicase PIF1,ATP-dependent DNA helicase PIF1,ATP-dependent DNA helicase PIF1	Pif1,Pif1,Pif1	ENSMUST00000141046,ENSMUST00000154970,ENSMUST00000047099 ENSMUST00000131483 ENSMUST00000134538	ENSMUSP00000120400,ENSMUSP00000117085,ENSMUSP00000049046	ENSMUSG00000041064,ENSMUSG00000041064,ENSMUSG00000041064	656.665	729.068	584.262	-0.318948	0.00683229	0.124188
ENSMUSG00000097392	chr5	104525735	104554207	+	D930016D06Rik	lincRNA								1434.42	1551.7	1317.14	-0.236272	0.00683465	0.124188
ENSMUSG00000021704	chr13	92844787	92858230	+	Mtx3	protein_coding	D3YTP3	D3YTP3_MOUSE	Protein Mtx3	Mtx3	ENSMUST00000076169	ENSMUSP00000075526	ENSMUSG00000021704	2091.36	2250.01	1932.7	-0.219206	0.00686705	0.124568
ENSMUSG00000040943	chr3	133463679	133545139	-	Tet2	protein_coding	Q4JK59 Q3U5R5 Q3U633 Q3UAI0 Q6ZPN2 Q8K2K3	TET2_MOUSE	Methylcytosine dioxygenase TET2	Tet2 Kiaa1546	ENSMUST00000098603	ENSMUSP00000096203	ENSMUSG00000040943	3420.76	3655.69	3185.83	-0.198417	0.00688434	0.124674
ENSMUSG00000044229	chr9	48362041	48400025	+	Nxpe4	protein_coding	Q52KP5 Q0VGS9 Q8BKY4	NXPE4_MOUSE	NXPE family member 4	Nxpe4 Fam55d	ENSMUST00000093853	ENSMUSP00000091375	ENSMUSG00000044229	579.659	509.582	649.735	0.349927	0.00690158	0.124779
ENSMUSG00000032113	chr9	36708482	36727065	-	Chek1	protein_coding	G3UX84,G3UYB1,G3UYC5,G3UZ93,O35280 O54925 Q8CI40 Q9D0N2	G3UX84_MOUSE,G3UYB1_MOUSE,G3UYC5_MOUSE,G3UZ93_MOUSE,CHK1_MOUSE	Serine/threonine-protein kinase Chk1,Serine/threonine-protein kinase Chk1,Serine/threonine-protein kinase Chk1,Serine/threonine-protein kinase Chk1,Serine/threonine-protein kinase Chk1	Chek1,Chek1,Chek1,Chek1,Chek1 Chk1	ENSMUST00000172742,ENSMUST00000173534,ENSMUST00000173963,ENSMUST00000174105,ENSMUST00000034625 ENSMUST00000172702	ENSMUSP00000133589,ENSMUSP00000134013,ENSMUSP00000134029,ENSMUSP00000134398,ENSMUSP00000034625	ENSMUSG00000032113,ENSMUSG00000032113,ENSMUSG00000032113,ENSMUSG00000032113,ENSMUSG00000032113	700.397	777.126	623.669	-0.316912	0.00695137	0.12547
ENSMUSG00000057842	chr13	67312998	67332560	-	Zfp595	protein_coding	B9EIT6,Q8BIN6	B9EIT6_MOUSE,Q8BIN6_MOUSE	Protein Zfp595 Zfp595 protein,Protein Zfp595 Regulator of sex-limitation candidate 23	Zfp595,Zfp595 Rslcan23	ENSMUST00000171466,ENSMUST00000109735 ENSMUST00000168892 ENSMUST00000169142	ENSMUSP00000127010,ENSMUSP00000105357	ENSMUSG00000057842,ENSMUSG00000057842	464.13	526.772	401.489	-0.390968	0.0069891	0.125943
ENSMUSG00000022389	chr15	81802421	81826861	+	Tef	protein_coding	E9Q331,E9Q3N8,Q9JLC6 Q3U426 Q3UGF4 Q3UM49 Q3URC8 Q6QHT6 Q8C6I0 Q8VD02	E9Q331_MOUSE,E9Q3N8_MOUSE,TEF_MOUSE	Thyrotroph embryonic factor,Thyrotroph embryonic factor,Thyrotroph embryonic factor	Tef,Tef,Tef	ENSMUST00000168200,ENSMUST00000172208,ENSMUST00000023024 ENSMUST00000109553	ENSMUSP00000132026,ENSMUSP00000129748,ENSMUSP00000023024	ENSMUSG00000022389,ENSMUSG00000022389,ENSMUSG00000022389	6235.58	5840.29	6630.88	0.183129	0.00703693	0.126595
ENSMUSG00000034706	chr11	114727408	114757889	+	Dnaic2	protein_coding	A2AC93 A2AC94,R4GML5	DNAI2_MOUSE,R4GML5_MOUSE	Dynein intermediate chain 2, axonemal,Dynein intermediate chain 2, axonemal	Dnai2 Dnaic2,Dnaic2	ENSMUST00000069325 ENSMUST00000092469,ENSMUST00000141762	ENSMUSP00000065787,ENSMUSP00000114700	ENSMUSG00000034706,ENSMUSG00000034706	381.748	329.578	433.919	0.395756	0.00707057	0.12699
ENSMUSG00000028402	chr4	81278500	81442815	-	Mpdz	protein_coding	A3KG80,A3KG81,A3KG82,A3KG83,A3KG84,D3YUX2,F7D0H8,I7HJS5,Q8VBX6 B7ZNA1 O08783 Q6P7U4 Q80ZY8 Q8BKJ1 Q8C0H8 Q8VBV5 Q8VBY0 Q9Z1K3	A3KG80_MOUSE,A3KG81_MOUSE,A3KG82_MOUSE,A3KG83_MOUSE,A3KG84_MOUSE,D3YUX2_MOUSE,F7D0H8_MOUSE,I7HJS5_MOUSE,MPDZ_MOUSE	Multiple PDZ domain protein,Multiple PDZ domain protein,Multiple PDZ domain protein,Multiple PDZ domain protein,Multiple PDZ domain protein,Multiple PDZ domain protein,Multiple PDZ domain protein,Multiple PDZ domain protein,Multiple PDZ domain protein	Mpdz,Mpdz,Mpdz,Mpdz,Mpdz,Mpdz,Mpdz,Mpdz,Mpdz Mupp1	ENSMUST00000125288,ENSMUST00000107258,ENSMUST00000134572,ENSMUST00000131547,ENSMUST00000134726,ENSMUST00000107262,ENSMUST00000131197,ENSMUST00000141995,ENSMUST00000102830	ENSMUSP00000117434,ENSMUSP00000102879,ENSMUSP00000122308,ENSMUSP00000116767,ENSMUSP00000116830,ENSMUSP00000102883,ENSMUSP00000122498,ENSMUSP00000118283,ENSMUSP00000099894	ENSMUSG00000028402,ENSMUSG00000028402,ENSMUSG00000028402,ENSMUSG00000028402,ENSMUSG00000028402,ENSMUSG00000028402,ENSMUSG00000028402,ENSMUSG00000028402,ENSMUSG00000028402	3162.76	3376.4	2949.11	-0.195145	0.00709507	0.127119
ENSMUSG00000031398	chrX	74329066	74344689	+	Plxna3	protein_coding	P70208 A5D6Q5 Q684J0 Q8BWZ5	PLXA3_MOUSE	Plexin-A3	Plxna3	ENSMUST00000004326	ENSMUSP00000004326	ENSMUSG00000031398	1001.41	1104.33	898.499	-0.297279	0.00712445	0.127119
ENSMUSG00000037815	chr18	35118888	35254773	+	Ctnna1	protein_coding	P26231	CTNA1_MOUSE	Catenin alpha-1	Ctnna1 Catna1	ENSMUST00000042345	ENSMUSP00000049007	ENSMUSG00000037815	13675.2	12939.4	14410.9	0.155376	0.0071101	0.127119
ENSMUSG00000072568	chr15	60818994	60853778	-	Fam84b	protein_coding	D3YXJ5	D3YXJ5_MOUSE	Protein Fam84b	Fam84b	ENSMUST00000100635	ENSMUSP00000098200	ENSMUSG00000072568	2646.03	2455.38	2836.69	0.208185	0.00711321	0.127119
ENSMUSG00000095123	chr10	4391587	4396424	+	Gm21781	lincRNA								1639.44	1780.48	1498.41	-0.248686	0.00718824	0.128047
ENSMUSG00000022216	chr14	55578123	55581529	+	Psme1	protein_coding	G3UWN9,G3UXR1,G3UXY0,G3UXZ5,G3X9K9,P97371 O35561 Q9D841	G3UWN9_MOUSE,G3UXR1_MOUSE,G3UXY0_MOUSE,G3UXZ5_MOUSE,G3X9K9_MOUSE,PSME1_MOUSE	Proteasome activator complex subunit 1,Proteasome activator complex subunit 1,Proteasome activator complex subunit 1,Proteasome activator complex subunit 1,Proteasome activator complex subunit 1,Proteasome activator complex subunit 1	Psme1,Psme1,Psme1,Psme1,Psme1,Psme1	ENSMUST00000174563,ENSMUST00000174419,ENSMUST00000172738,ENSMUST00000174484,ENSMUST00000089619,ENSMUST00000174259	ENSMUSP00000133366,ENSMUSP00000133791,ENSMUSP00000133867,ENSMUSP00000133883,ENSMUSP00000087046,ENSMUSP00000134735	ENSMUSG00000022216,ENSMUSG00000022216,ENSMUSG00000022216,ENSMUSG00000022216,ENSMUSG00000022216,ENSMUSG00000022216	2236.91	2063.82	2409.99	0.223613	0.00721015	0.128228
ENSMUSG00000021514	chr13	65278814	65304221	+	Zfp369	protein_coding	D3Z1J4,E9Q628,F8VQL6	D3Z1J4_MOUSE,E9Q628_MOUSE,F8VQL6_MOUSE	Neurotrophin receptor-interacting factor 2,Neurotrophin receptor-interacting factor 2,Neurotrophin receptor-interacting factor 2	Zfp369,Zfp369,Zfp369	ENSMUST00000155732,ENSMUST00000130799,ENSMUST00000126879	ENSMUSP00000119796,ENSMUSP00000116221,ENSMUSP00000119114	ENSMUSG00000021514,ENSMUSG00000021514,ENSMUSG00000021514	801.973	898.368	705.579	-0.348062	0.0072387	0.128316
ENSMUSG00000038305	chr1	57774162	57948394	+	Spats2l	protein_coding	E9PVQ3,E9PZE9,E9Q106,E9Q1C3,E9Q5S6,E9Q7S4,E9Q8P1,Q91WJ7 Q8K322 Q8VC37	E9PVQ3_MOUSE,E9PZE9_MOUSE,E9Q106_MOUSE,E9Q1C3_MOUSE,E9Q5S6_MOUSE,E9Q7S4_MOUSE,E9Q8P1_MOUSE,SPS2L_MOUSE	SPATS2-like protein,SPATS2-like protein,SPATS2-like protein,SPATS2-like protein,SPATS2-like protein,SPATS2-like protein,SPATS2-like protein,SPATS2-like protein	Spats2l,Spats2l,Spats2l,Spats2l,Spats2l,Spats2l,Spats2l,Spats2l	ENSMUST00000167085,ENSMUST00000164302,ENSMUST00000172068,ENSMUST00000172287,ENSMUST00000171699,ENSMUST00000163239,ENSMUST00000167971,ENSMUST00000169772 ENSMUST00000170139	ENSMUSP00000133054,ENSMUSP00000132592,ENSMUSP00000126166,ENSMUSP00000131125,ENSMUSP00000128239,ENSMUSP00000128992,ENSMUSP00000128764,ENSMUSP00000132975	ENSMUSG00000038305,ENSMUSG00000038305,ENSMUSG00000038305,ENSMUSG00000038305,ENSMUSG00000038305,ENSMUSG00000038305,ENSMUSG00000038305,ENSMUSG00000038305	1340.98	1227.81	1454.15	0.243904	0.00722813	0.128316
ENSMUSG00000045730	chr18	62177817	62179959	-	Adrb2	protein_coding	P18762 Q8BH38	ADRB2_MOUSE	Beta-2 adrenergic receptor	Adrb2 Adrb2r	ENSMUST00000053640	ENSMUSP00000062256	ENSMUSG00000045730	325.125	276.656	373.595	0.432035	0.00727198	0.128696
ENSMUSG00000027331	chr2	118814003	118853957	+	Knstrn	protein_coding	A3KGG6,A3KGG8,F6UVD3,F7BE71,H3BJ95,H3BJJ3,H3BKK2,H3BKV9,Q9D9Z1 Q8K2D9	A3KGG6_MOUSE,A3KGG8_MOUSE,F6UVD3_MOUSE,F7BE71_MOUSE,H3BJ95_MOUSE,H3BJJ3_MOUSE,H3BKK2_MOUSE,H3BKV9_MOUSE,SKAP_MOUSE	DNA segment, Chr 2, ERATO Doi 750, expressed, isoform CRA_c Small kinetochore-associated protein,Small kinetochore-associated protein,Small kinetochore-associated protein,Small kinetochore-associated protein,Small kinetochore-associated protein,Small kinetochore-associated protein,Small kinetochore-associated protein,Small kinetochore-associated protein,Small kinetochore-associated protein	Knstrn D2Ertd750e mCG_6532,Knstrn D2Ertd750e,Knstrn D2Ertd750e,Knstrn D2Ertd750e,Knstrn D2Ertd750e,Knstrn D2Ertd750e,Knstrn D2Ertd750e,Knstrn D2Ertd750e,Knstrn D2Ertd750e Skap Traf4af1	ENSMUST00000028803,ENSMUST00000110842,ENSMUST00000134579,ENSMUST00000126045,ENSMUST00000177103,ENSMUST00000148877,ENSMUST00000123104,ENSMUST00000176463,ENSMUST00000134661	ENSMUSP00000028803,ENSMUSP00000106466,ENSMUSP00000123065,ENSMUSP00000122844,ENSMUSP00000134898,ENSMUSP00000135008,ENSMUSP00000135422,ENSMUSP00000135549,ENSMUSP00000115860	ENSMUSG00000027331,ENSMUSG00000027331,ENSMUSG00000027331,ENSMUSG00000027331,ENSMUSG00000027331,ENSMUSG00000027331,ENSMUSG00000027331,ENSMUSG00000027331,ENSMUSG00000027331	2053.16	2202.82	1903.5	-0.21059	0.00736289	0.129973
ENSMUSG00000037894	chr3	137864487	137866922	+	H2afz	protein_coding	G3UWL7,G3UX40,P0C0S6 B2RXZ3 P17317 Q3UA55 Q3UK43 Q68FD2,Q3UA95	G3UWL7_MOUSE,G3UX40_MOUSE,H2AZ_MOUSE,Q3UA95_MOUSE	Histone H2A,Histone H2A,Z,Histone H2A,Z,Histone H2A	H2afz,H2afz,H2afz H2az,H2afz	ENSMUST00000173790,ENSMUST00000172696,ENSMUST00000041045,ENSMUST00000174561	ENSMUSP00000133339,ENSMUSP00000133541,ENSMUSP00000036907,ENSMUSP00000134059	ENSMUSG00000037894,ENSMUSG00000037894,ENSMUSG00000037894,ENSMUSG00000037894	5346.24	5669.52	5022.96	-0.174658	0.00737541	0.129973
ENSMUSG00000040811	chr7	19176421	19206482	+	Eml2	protein_coding	D3YWS2,D6RGM3,E9QK48,Q7TNG5 Q9DAS8	D3YWS2_MOUSE,D6RGM3_MOUSE,E9QK48_MOUSE,EMAL2_MOUSE	Echinoderm microtubule-associated protein-like 2,Echinoderm microtubule-associated protein-like 2,Echinoderm microtubule-associated protein-like 2,Echinoderm microtubule-associated protein-like 2	Eml2,Eml2,Eml2,Eml2	ENSMUST00000120595,ENSMUST00000148246,ENSMUST00000117338,ENSMUST00000048502	ENSMUSP00000112447,ENSMUSP00000115466,ENSMUSP00000112491,ENSMUSP00000037654	ENSMUSG00000040811,ENSMUSG00000040811,ENSMUSG00000040811,ENSMUSG00000040811	1133.74	1026.56	1240.93	0.273361	0.00737995	0.129973
ENSMUSG00000050234	chr4	127311421	127314039	-	Gja4	protein_coding	P28235	CXA4_MOUSE	Gap junction alpha-4 protein	Gja4 Cxn-37	ENSMUST00000053753	ENSMUSP00000062320	ENSMUSG00000050234	788.047	697.358	878.736	0.333103	0.00739329	0.129998
ENSMUSG00000069793	chr11	82979629	82991830	-	Slfn9	protein_coding	B1ARD6	B1ARD6_MOUSE	Protein Slfn9	Slfn9	ENSMUST00000038211 ENSMUST00000092840	ENSMUSP00000044435	ENSMUSG00000069793	1524.9	1673.9	1375.91	-0.282645	0.00742438	0.130334
ENSMUSG00000044786	chr7	28376784	28379255	-	Zfp36	protein_coding	P22893 P11520	TTP_MOUSE	Tristetraprolin	Zfp36 Tis11 Tis11a	ENSMUST00000051241	ENSMUSP00000057815	ENSMUSG00000044786	1135.54	1032.47	1238.62	0.262403	0.00748255	0.131143
ENSMUSG00000031134	chrX	57383530	57393036	-	Rbmx	protein_coding	A2AFI3,A2AFI4,Q9WV02 Q8C2U6 Q9R0Y0,S4R1F6	A2AFI3_MOUSE,A2AFI4_MOUSE,RBMX_MOUSE,S4R1F6_MOUSE	RNA binding motif protein, X chromosome, isoform CRA_b RNA-binding motif protein, X chromosome, N-terminally processed,RNA-binding motif protein, X chromosome,RNA-binding motif protein, X chromosome,RNA binding motif protein, X chromosome, isoform CRA_a RNA-binding motif protein, X chromosome	Rbmx mCG_17339,Rbmx,Rbmx Hnrnpg Hnrpg Rbmxp1 Rbmxrt,Rbmx mCG_17339	ENSMUST00000098470,ENSMUST00000133346,ENSMUST00000114726 ENSMUST00000114730 ENSMUST00000140384,ENSMUST00000143310	ENSMUSP00000096070,ENSMUSP00000118121,ENSMUSP00000110374,ENSMUSP00000138198	ENSMUSG00000031134,ENSMUSG00000031134,ENSMUSG00000031134,ENSMUSG00000031134	6020.41	6395.29	5645.53	-0.179871	0.00749782	0.1312
ENSMUSG00000032349	chr9	77917364	77984519	+	Elovl5	protein_coding	D3Z0Z6,D3Z136,Q8BHI7 Q8BLG6 Q8BUE3 Q8R5D3	D3Z0Z6_MOUSE,D3Z136_MOUSE,ELOV5_MOUSE	Elongation of very long chain fatty acids protein,Elongation of very long chain fatty acids protein,Elongation of very long chain fatty acids protein 5	Elovl5,Elovl5,Elovl5	ENSMUST00000134072,ENSMUST00000133757,ENSMUST00000034904	ENSMUSP00000120171,ENSMUSP00000123121,ENSMUSP00000034904	ENSMUSG00000032349,ENSMUSG00000032349,ENSMUSG00000032349	3996.84	3741.04	4252.64	0.184873	0.00751884	0.131323
ENSMUSG00000049281	chr9	40269216	40291618	+	Scn3b	protein_coding	H3BJ27,H3BJR6,H3BKP5,Q8BHK2 Q91Z99	H3BJ27_MOUSE,H3BJR6_MOUSE,H3BKP5_MOUSE,SCN3B_MOUSE	Sodium channel subunit beta-3,Sodium channel subunit beta-3,Sodium channel subunit beta-3,Sodium channel subunit beta-3	Scn3b,Scn3b,Scn3b,Scn3b	ENSMUST00000175949,ENSMUST00000176185,ENSMUST00000176547,ENSMUST00000049941 ENSMUST00000114956 ENSMUST00000171835	ENSMUSP00000134820,ENSMUSP00000135096,ENSMUSP00000135470,ENSMUSP00000051627	ENSMUSG00000049281,ENSMUSG00000049281,ENSMUSG00000049281,ENSMUSG00000049281	1063.56	944.351	1182.77	0.324472	0.00752899	0.131323
ENSMUSG00000037032	chr7	105558483	105581653	-	Apbb1	protein_coding	Q9QXJ1 E9QNW5 O08642 Q3TPU0 Q8BNF4 Q8BSR9	APBB1_MOUSE	Amyloid beta A4 precursor protein-binding family B member 1	Apbb1 Fe65	ENSMUST00000081165	ENSMUSP00000079932	ENSMUSG00000037032	1223.19	1118.97	1327.4	0.246221	0.00762353	0.132759
ENSMUSG00000033411	chr2	121956001	122013642	+	Ctdspl2	protein_coding	Q8BG15 A2ARL6 Q3TF86 Q3TQW7 Q3TV36 Q7TPZ9 Q8BPR3 Q8C9S0 Q8CEG6	CTSL2_MOUSE	CTD small phosphatase-like protein 2	Ctdspl2 D2Ertd485e	ENSMUST00000036647 ENSMUST00000110572 ENSMUST00000110574 ENSMUST00000110578	ENSMUSP00000047543	ENSMUSG00000033411	2313.37	2481.59	2145.14	-0.210105	0.00770777	0.133824
ENSMUSG00000085334	chr4	127033731	127049398	+	Gm12940	processed_transcript								1987.45	2136.79	1838.1	-0.217119	0.00770925	0.133824
ENSMUSG00000020456	chr11	6291633	6356642	+	Ogdh	protein_coding	Q5SVY0,Q5SVY1,Q60597 Q3UDM7 Q5DTI4 Q5SVX7 Q5SVX9 Q6PFZ2 Q80Y57 Q8K0K7 Q8K2Z3 Q8R3M2 Q91WP2	Q5SVY0_MOUSE,Q5SVY1_MOUSE,ODO1_MOUSE	2-oxoglutarate dehydrogenase, mitochondrial,2-oxoglutarate dehydrogenase, mitochondrial,2-oxoglutarate dehydrogenase, mitochondrial	Ogdh,Ogdh,Ogdh Kiaa4192	ENSMUST00000140765,ENSMUST00000135124,ENSMUST00000003461 ENSMUST00000093350 ENSMUST00000101554	ENSMUSP00000117323,ENSMUSP00000117505,ENSMUSP00000003461	ENSMUSG00000020456,ENSMUSG00000020456,ENSMUSG00000020456	3891.21	3648.57	4133.84	0.180105	0.00773235	0.134011
ENSMUSG00000023055	chr15	102706779	102722178	-	Calcoco1	protein_coding	E9Q7U2,F6Q5V4,Q8CGU1 Q5DTX0 Q9D935	E9Q7U2_MOUSE,F6Q5V4_MOUSE,CACO1_MOUSE	Calcium-binding and coiled-coil domain-containing protein 1,Calcium-binding and coiled-coil domain-containing protein 1,Calcium-binding and coiled-coil domain-containing protein 1	Calcoco1,Calcoco1,Calcoco1 CocoA Kiaa1536	ENSMUST00000171838,ENSMUST00000168112,ENSMUST00000023818	ENSMUSP00000130170,ENSMUSP00000128307,ENSMUSP00000023818	ENSMUSG00000023055,ENSMUSG00000023055,ENSMUSG00000023055	3742.87	3503.68	3982.05	0.18459	0.00775284	0.134152
ENSMUSG00000028581	chr4	130913125	130936141	+	Laptm5	protein_coding	B1ASF7,F6WX18,F8WH95,Q61168 Q60923	B1ASF7_MOUSE,F6WX18_MOUSE,F8WH95_MOUSE,LAPM5_MOUSE	Lysosomal-associated transmembrane protein 5,Lysosomal-associated transmembrane protein 5,Lysosomal-associated transmembrane protein 5,Lysosomal-associated transmembrane protein 5	Laptm5,Laptm5,Laptm5,Laptm5	ENSMUST00000156225,ENSMUST00000156742,ENSMUST00000030316,ENSMUST00000151698	ENSMUSP00000121133,ENSMUSP00000123382,ENSMUSP00000030316,ENSMUSP00000118415	ENSMUSG00000028581,ENSMUSG00000028581,ENSMUSG00000028581,ENSMUSG00000028581	617.32	549.026	685.614	0.32	0.007774	0.134305
ENSMUSG00000017146	chr11	101488764	101551955	-	Brca1	protein_coding	P48754 A2A4Q4 Q60957 Q60983	BRCA1_MOUSE	Breast cancer type 1 susceptibility protein homolog	Brca1	ENSMUST00000017290	ENSMUSP00000017290	ENSMUSG00000017146	1111.12	1217.95	1004.29	-0.27803	0.00779318	0.134423
ENSMUSG00000054115	chr15	9111985	9155425	-	Skp2	protein_coding	Q9Z0Z3 Q8BSG7 Q8C8Y9 Q8CB22 Q99J53	SKP2_MOUSE	S-phase kinase-associated protein 2	Skp2	ENSMUST00000096482 ENSMUST00000110585	ENSMUSP00000094225	ENSMUSG00000054115	1638.88	1773.78	1503.99	-0.237885	0.00783362	0.134907
ENSMUSG00000053399	chr8	113697126	113848615	-	Adamts18	protein_coding	Q4VC17 E9QNK0 Q8BZD1	ATS18_MOUSE	A disintegrin and metalloproteinase with thrombospondin motifs 18	Adamts18	ENSMUST00000093113	ENSMUSP00000090801	ENSMUSG00000053399	351.825	402.19	301.46	-0.414715	0.0079445	0.136543
ENSMUSG00000073664	chr1	60180599	60338328	+	Nbeal1	protein_coding	E9PV03,F6U6E8,F7BJ98,F7D418	E9PV03_MOUSE,F6U6E8_MOUSE,F7BJ98_MOUSE,F7D418_MOUSE	Protein Nbeal1,Protein Nbeal1,Protein Nbeal1,Protein Nbeal1	Nbeal1,Nbeal1,Nbeal1,Nbeal1	ENSMUST00000035569 ENSMUST00000160834,ENSMUST00000159344,ENSMUST00000162291,ENSMUST00000160980	ENSMUSP00000049393,ENSMUSP00000124850,ENSMUSP00000125592,ENSMUSP00000125147	ENSMUSG00000073664,ENSMUSG00000073664,ENSMUSG00000073664,ENSMUSG00000073664	4285.6	4544.1	4027.11	-0.174207	0.00795369	0.136543
ENSMUSG00000028127	chr3	121758774	121815302	-	Abcd3	protein_coding	P55096	ABCD3_MOUSE	ATP-binding cassette sub-family D member 3	Abcd3 Pmp70 Pxmp1	ENSMUST00000029770	ENSMUSP00000029770	ENSMUSG00000028127	4509.34	4215.31	4803.37	0.188367	0.0079883	0.136921
ENSMUSG00000021061	chr12	76580488	76710547	-	Sptb	protein_coding	E9Q397,Q3UGX2	E9Q397_MOUSE,Q3UGX2_MOUSE	Spectrin beta chain, erythrocytic,Spectrin beta 1 Spectrin beta 1, isoform CRA_b Spectrin beta chain, erythrocytic	Sptb Spnb1,Sptb Spnb1 mCG_123942	ENSMUST00000166101,ENSMUST00000021458	ENSMUSP00000129782,ENSMUSP00000021458	ENSMUSG00000021061,ENSMUSG00000021061	620.024	551.155	688.894	0.321303	0.0080946	0.138307
ENSMUSG00000024981	chr19	55253369	55296627	+	Acsl5	protein_coding	Q8JZR0	ACSL5_MOUSE	Long-chain-fatty-acid--CoA ligase 5	Acsl5 Facl5	ENSMUST00000043150	ENSMUSP00000046585	ENSMUSG00000024981	4475.1	4200.79	4749.4	0.177047	0.00808209	0.138307
ENSMUSG00000005615	chr16	32430921	32475070	+	Pcyt1a	protein_coding	D3Z3T5,P49586 Q542W4	D3Z3T5_MOUSE,PCY1A_MOUSE	Choline-phosphate cytidylyltransferase A,Choline-phosphate cytidylyltransferase A	Pcyt1a,Pcyt1a Ctpct Pcyt1	ENSMUST00000115137,ENSMUST00000079791 ENSMUST00000104893 ENSMUST00000115140	ENSMUSP00000110790,ENSMUSP00000078721	ENSMUSG00000005615,ENSMUSG00000005615	3620.75	3373.4	3868.09	0.197362	0.00816416	0.138842
ENSMUSG00000030353	chr6	128224288	128300823	-	Tead4	protein_coding	F6UKF4,F6ULG6,Q62296 A2BDD5 P70282 Q61174 Q61175 Q62298	F6UKF4_MOUSE,F6ULG6_MOUSE,TEAD4_MOUSE	Transcriptional enhancer factor TEF-3,Transcriptional enhancer factor TEF-3,Transcriptional enhancer factor TEF-3	Tead4,Tead4,Tead4 Tcf13r1 Tef3 Tefr1	ENSMUST00000133118,ENSMUST00000143004,ENSMUST00000006311 ENSMUST00000112157 ENSMUST00000130454	ENSMUSP00000120941,ENSMUSP00000118606,ENSMUSP00000006311	ENSMUSG00000030353,ENSMUSG00000030353,ENSMUSG00000030353	693.318	618.764	767.873	0.311026	0.00816328	0.138842
ENSMUSG00000089726	chr14	115042879	115046727	+	Mir17hg	lincRNA								865.598	962.601	768.596	-0.324335	0.00815774	0.138842
ENSMUSG00000034435	chr12	73543114	73546395	-	Tmem30b	protein_coding	Q8BHG3	CC50B_MOUSE	Cell cycle control protein 50B	Tmem30b Cdc50b	ENSMUST00000042975	ENSMUSP00000037476	ENSMUSG00000034435	289.497	245.132	333.863	0.444137	0.0082543	0.140156
ENSMUSG00000020482	chr11	5528887	5542187	-	Ccdc117	protein_coding	Q6PB51 Q8K217 Q99LL1	CC117_MOUSE	Coiled-coil domain-containing protein 117	Ccdc117	ENSMUST00000020776	ENSMUSP00000020776	ENSMUSG00000020482	1505.49	1386.52	1624.47	0.228344	0.00827433	0.140277
ENSMUSG00000022142	chr15	8109313	8159857	+	Nup155	protein_coding	Q99P88	NU155_MOUSE	Nuclear pore complex protein Nup155	Nup155	ENSMUST00000163765	ENSMUSP00000128819	ENSMUSG00000022142	2474.64	2662.5	2286.79	-0.219367	0.00830529	0.140398
ENSMUSG00000027715	chr3	36564865	36572150	-	Ccna2	protein_coding	D6RIK7,P51943 Q61459 Q8BRG1	D6RIK7_MOUSE,CCNA2_MOUSE	Cyclin-A2,Cyclin-A2	Ccna2,Ccna2 Ccna Cyca	ENSMUST00000147380,ENSMUST00000029270	ENSMUSP00000118239,ENSMUSP00000029270	ENSMUSG00000027715,ENSMUSG00000027715	3852.59	4102.12	3603.06	-0.1871	0.00832019	0.140398
ENSMUSG00000037486	chr12	3426857	3506852	+	Asxl2	protein_coding	D3Z112,D6REV1 F8VQA8,D6RI62,F6WV21,G3UXC9	D3Z112_MOUSE,D6REV1_MOUSE,D6RI62_MOUSE,F6WV21_MOUSE,G3UXC9_MOUSE	Putative Polycomb group protein ASXL2,Putative Polycomb group protein ASXL2,Putative Polycomb group protein ASXL2,Putative Polycomb group protein ASXL2,Putative Polycomb group protein ASXL2	Asxl2,Asxl2,Asxl2,Asxl2,Asxl2	ENSMUST00000092003,ENSMUST00000153102,ENSMUST00000144247,ENSMUST00000111215,ENSMUST00000138740	ENSMUSP00000089629,ENSMUSP00000117384,ENSMUSP00000116048,ENSMUSP00000106846,ENSMUSP00000133639	ENSMUSG00000037486,ENSMUSG00000037486,ENSMUSG00000037486,ENSMUSG00000037486,ENSMUSG00000037486	2689.35	2871.98	2506.72	-0.196175	0.00831194	0.140398
ENSMUSG00000026840	chr2	31887291	31946539	+	Lamc3	protein_coding	A2ATM9,Q9R0B6 Q4VAI3 Q9WTW6	A2ATM9_MOUSE,LAMC3_MOUSE	Laminin subunit gamma-3,Laminin subunit gamma-3	Lamc3,Lamc3	ENSMUST00000138325,ENSMUST00000028187	ENSMUSP00000118745,ENSMUSP00000028187	ENSMUSG00000026840,ENSMUSG00000026840	322.883	270.593	375.174	0.469958	0.00842265	0.141734
ENSMUSG00000031532	chr8	34154563	34170845	+	Saraf	protein_coding	Q8R3Q0 Q8C2F1 Q8C6G7 Q8N9S4 Q8R233 Q9D8R1	SARAF_MOUSE	Store-operated calcium entry-associated regulatory factor	Tmem66 Saraf	ENSMUST00000033933	ENSMUSP00000033933	ENSMUSG00000031532	2250.36	2080.46	2420.25	0.218156	0.0084473	0.141734
ENSMUSG00000037709	chr6	58932090	59024549	-	Fam13a	protein_coding	G3UYL7,Q8BGI4 Q8BZ91	G3UYL7_MOUSE,FA13A_MOUSE	Protein FAM13A,Protein FAM13A	Fam13a,Fam13a Fam13a1 Precm1	ENSMUST00000173193,ENSMUST00000089860	ENSMUSP00000134135,ENSMUSP00000087304	ENSMUSG00000037709,ENSMUSG00000037709	1704.64	1575.6	1833.67	0.218701	0.00845141	0.141734
ENSMUSG00000057406	chr5	33820725	33897975	+	Whsc1	protein_coding	D3Z229,D3Z3E0,D3Z3E4,F6S6G6,F6Y765,Q8BVE8 B3VCH6 Q6ZPY1 Q7TSF5 Q811F0	D3Z229_MOUSE,D3Z3E0_MOUSE,D3Z3E4_MOUSE,F6S6G6_MOUSE,F6Y765_MOUSE,NSD2_MOUSE	Histone-lysine N-methyltransferase NSD2,Histone-lysine N-methyltransferase NSD2,Histone-lysine N-methyltransferase NSD2,Histone-lysine N-methyltransferase NSD2,Histone-lysine N-methyltransferase NSD2,Histone-lysine N-methyltransferase NSD2	Whsc1,Whsc1,Whsc1,Whsc1,Whsc1,Whsc1 Kiaa1090 Nsd2	ENSMUST00000155880,ENSMUST00000114399 ENSMUST00000137191 ENSMUST00000139845,ENSMUST00000114397,ENSMUST00000142080,ENSMUST00000141416,ENSMUST00000058096 ENSMUST00000066854 ENSMUST00000075812	ENSMUSP00000121805,ENSMUSP00000110041,ENSMUSP00000110039,ENSMUSP00000115251,ENSMUSP00000117233,ENSMUSP00000058940	ENSMUSG00000057406,ENSMUSG00000057406,ENSMUSG00000057406,ENSMUSG00000057406,ENSMUSG00000057406,ENSMUSG00000057406	6212.93	6623.38	5802.48	-0.190867	0.00843367	0.141734
ENSMUSG00000015568	chr8	68880491	68907448	+	Lpl	protein_coding	P11152 Q05956 Q542L4 Q9D3M9 Q9DCM8	LIPL_MOUSE	Lipoprotein lipase	Lpl	ENSMUST00000015712 ENSMUST00000168401	ENSMUSP00000015712	ENSMUSG00000015568	1112.23	999.214	1225.25	0.293946	0.00853716	0.14227
ENSMUSG00000021133	chr12	80790532	80880832	+	Susd6	protein_coding	Q8BGE4	Q8BGE4_MOUSE	Protein 4933426M11Rik RIKEN cDNA 4933426M11, isoform CRA_b Uncharacterized protein	4933426M11Rik mCG_116315	ENSMUST00000068519	ENSMUSP00000064961	ENSMUSG00000021133	2876.23	2683.31	3069.14	0.193754	0.00862718	0.14227
ENSMUSG00000022091	chr14	70180468	70207637	-	Sorbs3	protein_coding	Q9R1Z8 Q62423	VINEX_MOUSE	Vinexin	Sorbs3 Scam1 Sh3d4	ENSMUST00000022682	ENSMUSP00000022682	ENSMUSG00000022091	2553.36	2374.88	2731.85	0.20194	0.00854101	0.14227
ENSMUSG00000024440	chr18	38267092	38284402	-	Pcdh12	protein_coding	O55134 G5E847	PCD12_MOUSE	Protocadherin-12	Pcdh12	ENSMUST00000025311	ENSMUSP00000025311	ENSMUSG00000024440	1998.06	1844.03	2152.1	0.222769	0.00860015	0.14227
ENSMUSG00000024817	chr19	30030513	30093722	+	Uhrf2	protein_coding	Q3T995,Q7TMI3 Q8BG56 Q8BJP6 Q8BY30 Q8K1I5	Q3T995_MOUSE,UHRF2_MOUSE	E3 ubiquitin-protein ligase UHRF2,E3 ubiquitin-protein ligase UHRF2	Uhrf2,Uhrf2 Nirf	ENSMUST00000112552,ENSMUST00000025739	ENSMUSP00000108171,ENSMUSP00000025739	ENSMUSG00000024817,ENSMUSG00000024817	3461.22	3720.16	3202.28	-0.216202	0.00857873	0.14227
ENSMUSG00000029330	chr5	101765130	101823858	+	Cds1	protein_coding	P98191 Q8CGZ1	CDS1_MOUSE	Phosphatidate cytidylyltransferase 1	Cds1 Cds	ENSMUST00000031273	ENSMUSP00000031273	ENSMUSG00000029330	1397.59	1281.3	1513.88	0.240472	0.0085077	0.14227
ENSMUSG00000040260	chr17	49456022	49564337	-	Daam2	protein_coding	Q80U19 E9QNU9 Q6TAB7 Q810J5	DAAM2_MOUSE	Disheveled-associated activator of morphogenesis 2	Daam2 Kiaa0381	ENSMUST00000057610	ENSMUSP00000052085	ENSMUSG00000040260	3943.83	4210.03	3677.64	-0.195002	0.00862424	0.14227
ENSMUSG00000049775	chrX	167207093	167209315	-	Tmsb4x	protein_coding	P20065	TYB4_MOUSE	Thymosin beta-4	Tmsb4x Ptmb4 Tmsb4	ENSMUST00000112172 ENSMUST00000112175 ENSMUST00000112176	ENSMUSP00000107795	ENSMUSG00000049775	67003.4	62775	71231.7	0.182328	0.00862431	0.14227
ENSMUSG00000060487	chr10	9627259	9675208	-	Samd5	protein_coding	Q3V1H9 A6H5X3 Q8BJC5	SAMD5_MOUSE	Sterile alpha motif domain-containing protein 5	Samd5	ENSMUST00000100070	ENSMUSP00000097648	ENSMUSG00000060487	358.53	409.943	307.118	-0.415456	0.00857871	0.14227
ENSMUSG00000063011	chr17	25748614	25754327	-	Msln	protein_coding	Q61468	MSLN_MOUSE	Mesothelin	Msln Mes Mpf	ENSMUST00000075884	ENSMUSP00000075279	ENSMUSG00000063011	4553.73	3721.91	5385.55	0.532931	0.00855384	0.14227
ENSMUSG00000063856	chr9	108338903	108340343	+	Gpx1	protein_coding	P11352 P12079 Q544W3 Q5RJH8 Q9CR54	GPX1_MOUSE	Glutathione peroxidase 1	Gpx1	ENSMUST00000082429	ENSMUSP00000081010	ENSMUSG00000063856	3353.69	3095.59	3611.79	0.222436	0.00854793	0.14227
ENSMUSG00000024691	chr19	12545740	12589768	+	Fam111a	protein_coding	D3YYD2,Q9D2L9 Q3T9N2 Q8BLH2 Q8CI07 Q8VE75 Q9CU11	D3YYD2_MOUSE,F111A_MOUSE	Protein FAM111A,Protein FAM111A	Fam111a,Fam111a Kiaa1895	ENSMUST00000151307,ENSMUST00000025595 ENSMUST00000144662	ENSMUSP00000123598,ENSMUSP00000025595	ENSMUSG00000024691,ENSMUSG00000024691	1826.87	1991.96	1661.79	-0.261301	0.0086827	0.142969
ENSMUSG00000032815	chr8	123268300	123318576	-	Fanca	protein_coding	D3YZ28,D3Z403,D3Z6Y5,F7CK17,Q9JL70 E9QKQ4 Q9ESU9 Q9ESV3 Q9ET44 Q9JL64 Q9JL65 Q9JL66 Q9JL67 Q9JL68 Q9JL69	D3YZ28_MOUSE,D3Z403_MOUSE,D3Z6Y5_MOUSE,F7CK17_MOUSE,FANCA_MOUSE	Fanconi anemia group A protein homolog,Fanconi anemia group A protein homolog,Fanconi anemia group A protein homolog,Fanconi anemia group A protein homolog,Fanconi anemia group A protein homolog	Fanca,Fanca,Fanca,Fanca,Fanca	ENSMUST00000155510,ENSMUST00000126834,ENSMUST00000118395,ENSMUST00000127904,ENSMUST00000035495	ENSMUSP00000118712,ENSMUSP00000116732,ENSMUSP00000113125,ENSMUSP00000116614,ENSMUSP00000045217	ENSMUSG00000032815,ENSMUSG00000032815,ENSMUSG00000032815,ENSMUSG00000032815,ENSMUSG00000032815	598.459	670.842	526.076	-0.350111	0.00870508	0.143121
ENSMUSG00000019179	chr5	135778480	135790398	+	Mdh2	protein_coding	J3QMC8,P08249 Q0QF44 Q8CF79 Q8R1P0	J3QMC8_MOUSE,MDHM_MOUSE	Malate dehydrogenase, mitochondrial,Malate dehydrogenase, mitochondrial	Mdh2,Mdh2 Mor1	ENSMUST00000138101,ENSMUST00000019323	ENSMUSP00000136225,ENSMUSP00000019323	ENSMUSG00000019179,ENSMUSG00000019179	3057.77	2860.68	3254.86	0.186177	0.0087254	0.143239
ENSMUSG00000040723	chr1	165646516	165709757	-	Rcsd1	protein_coding	Q3UZA1 Q3TAD8 Q3TBC2 Q3TGA5 Q8R3A0	CPZIP_MOUSE	CapZ-interacting protein	Rcsd1 Capzip	ENSMUST00000040357 ENSMUST00000097474	ENSMUSP00000043724	ENSMUSG00000040723	2122.71	1967.37	2278.05	0.211433	0.00878042	0.143925
ENSMUSG00000027639	chr2	157097533	157135265	-	Samhd1	protein_coding	E0CXZ5,E9PYG9,E9Q0K6,F6TVP2,F8WJE0	E0CXZ5_MOUSE,E9PYG9_MOUSE,E9Q0K6_MOUSE,F6TVP2_MOUSE,F8WJE0_MOUSE	Deoxynucleoside triphosphate triphosphohydrolase SAMHD1,Deoxynucleoside triphosphate triphosphohydrolase SAMHD1,Deoxynucleoside triphosphate triphosphohydrolase SAMHD1,Deoxynucleoside triphosphate triphosphohydrolase SAMHD1,Deoxynucleoside triphosphate triphosphohydrolase SAMHD1	Samhd1,Samhd1,Samhd1,Samhd1,Samhd1	ENSMUST00000123932,ENSMUST00000109549,ENSMUST00000088523,ENSMUST00000139263,ENSMUST00000057725	ENSMUSP00000124599,ENSMUSP00000105176,ENSMUSP00000085880,ENSMUSP00000124935,ENSMUSP00000059717	ENSMUSG00000027639,ENSMUSG00000027639,ENSMUSG00000027639,ENSMUSG00000027639,ENSMUSG00000027639	3980.48	3733.6	4227.36	0.179144	0.00882656	0.144464
ENSMUSG00000029328	chr5	100033577	100039664	-	Hnrnpdl	protein_coding	D3YTQ3,F6VQH5,F6ZKM7	D3YTQ3_MOUSE,F6VQH5_MOUSE,F6ZKM7_MOUSE	Heterogeneous nuclear ribonucleoprotein D-like,Heterogeneous nuclear ribonucleoprotein D-like,Heterogeneous nuclear ribonucleoprotein D-like	Hnrnpdl Hnrnpdl1 Hnrpdl,Hnrnpdl Hnrnpdl1 Hnrpdl,Hnrnpdl Hnrnpdl1 Hnrpdl	ENSMUST00000086900 ENSMUST00000128187,ENSMUST00000153442,ENSMUST00000149384	ENSMUSP00000084114,ENSMUSP00000118555,ENSMUSP00000117589	ENSMUSG00000029328,ENSMUSG00000029328,ENSMUSG00000029328	11115.8	11709	10522.6	-0.15411	0.00886181	0.144823
ENSMUSG00000029089	chr5	48327952	48414294	+	Pacrgl	protein_coding	Q9D3X5	PACRL_MOUSE	PACRG-like protein	Pacrgl	ENSMUST00000030968	ENSMUSP00000030968	ENSMUSG00000029089	668.303	740.685	595.92	-0.313268	0.00888879	0.144971
ENSMUSG00000030779	chr7	122965686	123002557	+	Rbbp6	protein_coding	D3YZU8,P97868 P70287 Q3TTR9 Q3TUM7 Q3UMP7 Q4U217 Q7TT06 Q8BNY8 Q8R399	D3YZU8_MOUSE,RBBP6_MOUSE	E3 ubiquitin-protein ligase RBBP6,E3 ubiquitin-protein ligase RBBP6	Rbbp6,Rbbp6 P2pr Pact	ENSMUST00000148880,ENSMUST00000052135 ENSMUST00000071590 ENSMUST00000098062	ENSMUSP00000115530,ENSMUSP00000049528	ENSMUSG00000030779,ENSMUSG00000030779	4778.18	5072.54	4483.82	-0.177943	0.0088975	0.144971
ENSMUSG00000047793	chr1	93235841	93301065	+	Sned1	protein_coding	F6V5H4,Q70E20 A6H6I3 Q810H2 Q8BMD9	F6V5H4_MOUSE,SNED1_MOUSE	Sushi, nidogen and EGF-like domain-containing protein 1,Sushi, nidogen and EGF-like domain-containing protein 1	Sned1,Sned1 Snep	ENSMUST00000163688,ENSMUST00000062202	ENSMUSP00000132455,ENSMUSP00000050832	ENSMUSG00000047793,ENSMUSG00000047793	3589.88	3872.22	3307.54	-0.22734	0.00892517	0.145204
ENSMUSG00000036501	chr18	34442352	34506823	-	Fam13b	protein_coding	Q8K2H3	FA13B_MOUSE	Protein FAM13B	Fam13b Fam13b1	ENSMUST00000040506	ENSMUSP00000038199	ENSMUSG00000036501	1513.43	1649.26	1377.6	-0.259483	0.00897383	0.145778
ENSMUSG00000074364	chr7	15946977	15967567	-	Ehd2	protein_coding	D3Z7U7,Q8BH64 Q8BL28	D3Z7U7_MOUSE,EHD2_MOUSE	EH domain-containing protein 2,EH domain-containing protein 2	Ehd2,Ehd2	ENSMUST00000144956,ENSMUST00000098799	ENSMUSP00000119933,ENSMUSP00000096397	ENSMUSG00000074364,ENSMUSG00000074364	9014.89	8539.34	9490.45	0.152335	0.00901822	0.146281
ENSMUSG00000041957	chr16	16213318	16272712	+	Pkp2	protein_coding	E0CX59,E0CXK9,Q9CQ73	E0CX59_MOUSE,E0CXK9_MOUSE,Q9CQ73_MOUSE	Protein Pkp2,Protein Pkp2,Plakophilin 2 Protein Pkp2	Pkp2,Pkp2,Pkp2 mCG_126835	ENSMUST00000162150,ENSMUST00000161342,ENSMUST00000039408	ENSMUSP00000124898,ENSMUSP00000125219,ENSMUSP00000036890	ENSMUSG00000041957,ENSMUSG00000041957,ENSMUSG00000041957	733.035	657.575	808.494	0.297672	0.00906008	0.146523
ENSMUSG00000074971	chr2	110360917	110363183	-	Fibin	protein_coding	Q9CQS3	FIBIN_MOUSE	Fin bud initiation factor homolog	Fibin	ENSMUST00000099626	ENSMUSP00000097221	ENSMUSG00000074971	2464.06	2295.88	2632.25	0.197167	0.00904708	0.146523
ENSMUSG00000003420	chr7	45092993	45103822	-	Fcgrt	protein_coding	Q61559 Q9QUR0 Q9R2A5	FCGRN_MOUSE	IgG receptor FcRn large subunit p51	Fcgrt Fcrn	ENSMUST00000003512	ENSMUSP00000003512	ENSMUSG00000003420	1554.07	1417.88	1690.25	0.253343	0.00911421	0.146707
ENSMUSG00000016921	chr2	162931528	162937121	+	Srsf6	protein_coding	Q3TWW8 Q3UJV5 Q921K3 Q9DBP1	SRSF6_MOUSE	Serine/arginine-rich splicing factor 6	Srsf6 Sfrs6 Srp55	ENSMUST00000130411	ENSMUSP00000119065	ENSMUSG00000016921	15879.1	16668.3	15089.9	-0.143517	0.00910128	0.146707
ENSMUSG00000022974	chr16	91014037	91044543	-	Paxbp1	protein_coding	F6YS88,F6YY19,P58501 E9QNN9 Q78XY2 Q8R2W3 Q9CRB7	F6YS88_MOUSE,F6YY19_MOUSE,PAXB1_MOUSE	PAX3- and PAX7-binding protein 1,PAX3- and PAX7-binding protein 1,PAX3- and PAX7-binding protein 1	Paxbp1 Gcfc1,Paxbp1 Gcfc1,Paxbp1 Gcfc Gcfc1	ENSMUST00000145136,ENSMUST00000023698,ENSMUST00000118522	ENSMUSP00000117142,ENSMUSP00000023698,ENSMUSP00000113835	ENSMUSG00000022974,ENSMUSG00000022974,ENSMUSG00000022974	3734.2	3997.98	3470.42	-0.204107	0.00910792	0.146707
ENSMUSG00000033715	chr13	4049011	4090422	+	Akr1c14	protein_coding	Q91WT7	Q91WT7_MOUSE	3-alpha-hydroxysteroid dehydrogenase type 1 Aldo-keto reductase family 1, member C14 Aldo-keto reductase family 1, member C14, isoform CRA_b Protein Akr1c14	Akr1c14 mCG_1727	ENSMUST00000041768 ENSMUST00000118717	ENSMUSP00000045394	ENSMUSG00000033715	1487.91	1230.51	1745.32	0.503888	0.00913223	0.146707
ENSMUSG00000035133	chr12	52516077	52567852	+	Arhgap5	protein_coding	E9PYT0	E9PYT0_MOUSE	Rho GTPase-activating protein 5	Arhgap5	ENSMUST00000110725	ENSMUSP00000106353	ENSMUSG00000035133	4850.82	5155.74	4545.91	-0.181574	0.0091563	0.146707
ENSMUSG00000079523	chr6	72957347	72958748	-	Tmsb10	protein_coding								9408.85	9974.88	8842.82	-0.173774	0.0091658	0.146707
ENSMUSG00000106734	chr6	3333194	3346128	-	RP24-328P2,5	processed_transcript								1303.73	1410.87	1196.6	-0.237464	0.00914672	0.146707
ENSMUSG00000003929	chr17	33329342	33358878	-	Zfp81	protein_coding	B8JJZ7	B8JJZ7_MOUSE	Protein Zfp81	Zfp81	ENSMUST00000054072	ENSMUSP00000050728	ENSMUSG00000003929	1321.52	1443.51	1199.52	-0.266925	0.00919625	0.146778
ENSMUSG00000054814	chr5	73998453	74068431	-	Usp46	protein_coding	D3YVJ5,D3YVU0,P62069 Q3ULU5 Q80V95 Q9H7U4 Q9H9T8	D3YVJ5_MOUSE,D3YVU0_MOUSE,UBP46_MOUSE	Ubiquitin carboxyl-terminal hydrolase 46,Ubiquitin carboxyl-terminal hydrolase 46,Ubiquitin carboxyl-terminal hydrolase 46	Usp46,Usp46,Usp46	ENSMUST00000145016,ENSMUST00000119154,ENSMUST00000068058	ENSMUSP00000114395,ENSMUSP00000114060,ENSMUSP00000070554	ENSMUSG00000054814,ENSMUSG00000054814,ENSMUSG00000054814	3322.86	3115.69	3530.03	0.180076	0.00919725	0.146778
ENSMUSG00000025326	chr7	59228750	59311536	+	Ube3a	protein_coding	E9QKT1	E9QKT1_MOUSE	Ubiquitin-protein ligase E3A	Ube3a	ENSMUST00000107537	ENSMUSP00000103161	ENSMUSG00000025326	4877.84	5190.71	4564.97	-0.185286	0.00923755	0.147206
ENSMUSG00000037808	chr9	13827716	13846541	+	Fam76b	protein_coding	D6RG49,Q80XP8 Q3UMA6 Q80YR1 Q8CI69	D6RG49_MOUSE,FA76B_MOUSE	Protein FAM76B RIKEN cDNA 2810485I05, isoform CRA_b,Protein FAM76B	Fam76b 2810485I05Rik mCG_113475,Fam76b	ENSMUST00000156680,ENSMUST00000059579	ENSMUSP00000115751,ENSMUSP00000062642	ENSMUSG00000037808,ENSMUSG00000037808	2635.33	2816.89	2453.76	-0.199032	0.00927876	0.147646
ENSMUSG00000032449	chr9	97074961	97111157	-	Slc25a36	protein_coding	D6RH79,F6R114,Q8BZJ4,Q922G0	D6RH79_MOUSE,F6R114_MOUSE,Q8BZJ4_MOUSE,S2536_MOUSE	Solute carrier family 25 member 36,Solute carrier family 25 member 36,Solute carrier family 25 member 36,Solute carrier family 25 member 36	Slc25a36,Slc25a36,Slc25a36,Slc25a36	ENSMUST00000153070,ENSMUST00000124250,ENSMUST00000035024,ENSMUST00000085206	ENSMUSP00000116813,ENSMUSP00000119696,ENSMUSP00000035024,ENSMUSP00000082302	ENSMUSG00000032449,ENSMUSG00000032449,ENSMUSG00000032449,ENSMUSG00000032449	6822.02	7216.19	6427.85	-0.166876	0.00929626	0.147709
ENSMUSG00000025150	chr11	120729489	120732114	-	Cbr2	protein_coding	F6YNX9,P08074	F6YNX9_MOUSE,CBR2_MOUSE	Carbonyl reductase [NADPH] 2,Carbonyl reductase [NADPH] 2	Cbr2,Cbr2	ENSMUST00000154565,ENSMUST00000026148	ENSMUSP00000117739,ENSMUSP00000026148	ENSMUSG00000025150,ENSMUSG00000025150	5328.15	3892.77	6763.54	0.796824	0.00937937	0.148595
ENSMUSG00000025270	chrX	150547375	150570638	+	Alas2	protein_coding	A2AFM1,P08680 Q64452 Q9DCN0	A2AFM1_MOUSE,HEM0_MOUSE	5-aminolevulinate synthase,5-aminolevulinate synthase, erythroid-specific, mitochondrial	Alas2,Alas2	ENSMUST00000112715,ENSMUST00000066337	ENSMUSP00000108335,ENSMUSP00000066040	ENSMUSG00000025270,ENSMUSG00000025270	2000.54	1638.59	2362.49	0.527584	0.00937416	0.148595
ENSMUSG00000009079	chr11	5069689	5099266	-	Ewsr1	protein_coding	Q5SUS8,Q5SUS9,Q5SUT0,Q61545 Q9D2P0,Q8BQU4	Q5SUS8_MOUSE,Q5SUS9_MOUSE,Q5SUT0_MOUSE,EWS_MOUSE,Q8BQU4_MOUSE	RNA-binding protein EWS,RNA-binding protein EWS,RNA-binding protein EWS,RNA-binding protein EWS,RNA-binding protein EWS	Ewsr1,Ewsr1,Ewsr1,Ewsr1 Ews Ewsh,Ewsr1	ENSMUST00000093365,ENSMUST00000102930,ENSMUST00000073308,ENSMUST00000079949,ENSMUST00000063232	ENSMUSP00000091057,ENSMUSP00000099994,ENSMUSP00000073034,ENSMUSP00000078867,ENSMUSP00000066827	ENSMUSG00000009079,ENSMUSG00000009079,ENSMUSG00000009079,ENSMUSG00000009079,ENSMUSG00000009079	14589.4	15365.1	13813.7	-0.153549	0.00942711	0.149135
ENSMUSG00000064373	chr15	3268547	3280508	+	Sepp1	protein_coding	E0CX80,E0CY03,E0CZ76,E0CZC5,P70274 Q3TJ31 Q3TXG8 Q6PKE7 Q80T08 Q80UF3 Q9Z2T7	E0CX80_MOUSE,E0CY03_MOUSE,E0CZ76_MOUSE,E0CZC5_MOUSE,SEPP1_MOUSE	Selenoprotein P,Selenoprotein P,Selenoprotein P,Selenoprotein P,Selenoprotein P	Sepp1,Sepp1,Sepp1,Sepp1,Sepp1 Selp	ENSMUST00000160787,ENSMUST00000160311,ENSMUST00000159158,ENSMUST00000160930,ENSMUST00000082424 ENSMUST00000159216	ENSMUSP00000124852,ENSMUSP00000124580,ENSMUSP00000125632,ENSMUSP00000125505,ENSMUSP00000081004	ENSMUSG00000064373,ENSMUSG00000064373,ENSMUSG00000064373,ENSMUSG00000064373,ENSMUSG00000064373	9251.29	8699.04	9803.53	0.172427	0.00945915	0.149424
ENSMUSG00000022453	chr15	82329532	82338826	-	Naga	protein_coding	Q9QWR8 O88620 Q8R437 Q8VDK2	NAGAB_MOUSE	Alpha-N-acetylgalactosaminidase	Naga	ENSMUST00000023088	ENSMUSP00000023088	ENSMUSG00000022453	1285.69	1178.17	1393.21	0.241672	0.00952351	0.150223
ENSMUSG00000008384	chr7	27486910	27490316	+	Sertad1	protein_coding	D3Z2X7,Q9JL10 Q925E6 Q9D888	D3Z2X7_MOUSE,SRTD1_MOUSE	SERTA domain-containing protein 1,SERTA domain-containing protein 1	Sertad1,Sertad1 Sei1	ENSMUST00000135881,ENSMUST00000008528	ENSMUSP00000119180,ENSMUSP00000008528	ENSMUSG00000008384,ENSMUSG00000008384	579.325	513.482	645.168	0.328789	0.00955688	0.150531
ENSMUSG00000031089	chrX	21714896	21742355	+	Slc6a14	protein_coding	Q9JMA9 Q91Y60 Q9D317 Q9R183	S6A14_MOUSE	Sodium- and chloride-dependent neutral and basic amino acid transporter B(0+)	Slc6a14	ENSMUST00000033414	ENSMUSP00000033414	ENSMUSG00000031089	1652.66	1525.85	1779.47	0.2217	0.00963952	0.151614
ENSMUSG00000021048	chr12	76255232	76319820	+	Mthfd1	protein_coding	Q922D8 Q8R013	C1TC_MOUSE	C-1-tetrahydrofolate synthase, cytoplasmic	Mthfd1	ENSMUST00000021443	ENSMUSP00000021443	ENSMUSG00000021048	2331.16	2173.59	2488.73	0.195248	0.0096846	0.152103
ENSMUSG00000022422	chr15	55076099	55090491	-	Dscc1	protein_coding	D3YVY9,Q14AI0 Q4FZL5	D3YVY9_MOUSE,DCC1_MOUSE	Protein Dscc1,Sister chromatid cohesion protein DCC1	Dscc1,DSCC1 DCC1	ENSMUST00000110231,ENSMUST00000023059	ENSMUSP00000105860,ENSMUSP00000023059	ENSMUSG00000022422,ENSMUSG00000022422	265.605	307.213	223.998	-0.454011	0.00972787	0.152401
ENSMUSG00000023987	chr17	47726842	47734482	+	Pgc	protein_coding	D3YZ92,Q9D7R7 Q9D7T2	D3YZ92_MOUSE,PEPC_MOUSE	Gastricsin,Gastricsin	Pgc,Pgc Upg1	ENSMUST00000144955,ENSMUST00000024782	ENSMUSP00000123459,ENSMUSP00000024782	ENSMUSG00000023987,ENSMUSG00000023987	404	352.036	455.963	0.372263	0.00977253	0.152401
ENSMUSG00000026274	chr1	93308770	93343482	-	Pask	protein_coding	D3YUI8,Q8CEE6 E9QM58 Q91YD8	D3YUI8_MOUSE,PASK_MOUSE	PAS domain-containing serine/threonine-protein kinase,PAS domain-containing serine/threonine-protein kinase	Pask,Pask Kiaa0135	ENSMUST00000128253,ENSMUST00000027493	ENSMUSP00000120104,ENSMUSP00000027493	ENSMUSG00000026274,ENSMUSG00000026274	790.209	870.024	710.394	-0.292064	0.00976899	0.152401
ENSMUSG00000030653	chr7	101421691	101512829	+	Pde2a	protein_coding	Q3TXZ6,Q5PR72	Q3TXZ6_MOUSE,Q5PR72_MOUSE	cGMP-dependent 3',5'-cyclic phosphodiesterase,Phosphodiesterase 2A, cGMP-stimulated cGMP-dependent 3',5'-cyclic phosphodiesterase	Pde2a,Pde2a	ENSMUST00000163751,ENSMUST00000084894 ENSMUST00000166652	ENSMUSP00000131553,ENSMUSP00000081956	ENSMUSG00000030653,ENSMUSG00000030653	745.718	819.886	671.55	-0.287539	0.00977362	0.152401
ENSMUSG00000033439	chr3	116581093	116614587	-	Trmt13	protein_coding	Q8BYH3,S4R2S3,V9GWW9,V9GXM2	TRM13_MOUSE,S4R2S3_MOUSE,V9GWW9_MOUSE,V9GXM2_MOUSE	tRNA:m(4)X modification enzyme TRM13 homolog,tRNA:m(4)X modification enzyme TRM13 homolog,MCG2008, isoform CRA_b tRNA:m(4)X modification enzyme TRM13 homolog,tRNA:m(4)X modification enzyme TRM13 homolog	Trmt13 Ccdc76,Trmt13,Trmt13 mCG_2008,Trmt13	ENSMUST00000041524,ENSMUST00000134761,ENSMUST00000184963,ENSMUST00000183638	ENSMUSP00000047320,ENSMUSP00000138761,ENSMUSP00000138868,ENSMUSP00000139223	ENSMUSG00000033439,ENSMUSG00000033439,ENSMUSG00000033439,ENSMUSG00000033439	580.884	649.627	512.141	-0.342476	0.00977022	0.152401
ENSMUSG00000006678	chrX	93304767	93632155	-	Pola1	protein_coding	P33609	DPOLA_MOUSE	DNA polymerase alpha catalytic subunit	Pola1 Pola	ENSMUST00000006856	ENSMUSP00000006856	ENSMUSG00000006678	1442.51	1557.65	1327.36	-0.230643	0.00986332	0.153142
ENSMUSG00000022237	chr15	31291479	31367759	-	Ankrd33b	protein_coding	H7BX04,Q3U0L2 Q8BJA8 Q9CYB2 Q9CZ88 Q9DCQ8	H7BX04_MOUSE,AN33B_MOUSE	Ankyrin repeat domain-containing protein 33B,Ankyrin repeat domain-containing protein 33B	Ankrd33b,Ankrd33b	ENSMUST00000044324,ENSMUST00000076942 ENSMUST00000110410 ENSMUST00000123325 ENSMUST00000156679	ENSMUSP00000037918,ENSMUSP00000076209	ENSMUSG00000022237,ENSMUSG00000022237	488.962	428.278	549.646	0.359212	0.00986223	0.153142
ENSMUSG00000056737	chr6	72544391	72562983	+	Capg	protein_coding	D3YTL5,D3YU77,D3YZN3,D3Z014,D3Z4K5,Q99LB4	D3YTL5_MOUSE,D3YU77_MOUSE,D3YZN3_MOUSE,D3Z014_MOUSE,D3Z4K5_MOUSE,Q99LB4_MOUSE	Macrophage-capping protein,Macrophage-capping protein,Macrophage-capping protein,Macrophage-capping protein,Macrophage-capping protein,Capping protein (Actin filament), gelsolin-like Capping protein (Actin filament), gelsolin-like, isoform CRA_a Macrophage-capping protein	Capg,Capg,Capg,Capg,Capg,Capg mCG_129296	ENSMUST00000126101,ENSMUST00000126124,ENSMUST00000155188,ENSMUST00000134809,ENSMUST00000155705,ENSMUST00000071044 ENSMUST00000114071 ENSMUST00000114072	ENSMUSP00000121121,ENSMUSP00000121221,ENSMUSP00000120363,ENSMUSP00000118022,ENSMUSP00000117440,ENSMUSP00000063389	ENSMUSG00000056737,ENSMUSG00000056737,ENSMUSG00000056737,ENSMUSG00000056737,ENSMUSG00000056737,ENSMUSG00000056737	1028.79	927.647	1129.93	0.284305	0.00985712	0.153142
ENSMUSG00000040969	chr3	133112278	133234949	-	Arhgef38	protein_coding	E0CXB4,F6U786,Q80VK6 E2QRQ2 Q9D274	E0CXB4_MOUSE,F6U786_MOUSE,ARH38_MOUSE	RIKEN cDNA 9130221D24, isoform CRA_b Rho guanine nucleotide exchange factor 38,Rho guanine nucleotide exchange factor 38,Rho guanine nucleotide exchange factor 38	Arhgef38 9130221D24Rik mCG_123955,Arhgef38,Arhgef38	ENSMUST00000161932,ENSMUST00000054105,ENSMUST00000147041 ENSMUST00000161022	ENSMUSP00000124776,ENSMUSP00000054558,ENSMUSP00000114238	ENSMUSG00000040969,ENSMUSG00000040969,ENSMUSG00000040969	343.954	291.747	396.161	0.44007	0.00991774	0.153767
ENSMUSG00000019961	chr10	91147571	91171582	-	Tmpo	protein_coding	Q61029 Q3UCI5 Q61030 Q61031 Q61032,Q61033 B2RUB9 Q61028	LAP2B_MOUSE,LAP2A_MOUSE	Lamina-associated polypeptide 2, isoforms beta/delta/epsilon/gamma,Lamina-associated polypeptide 2, isoforms alpha/zeta	Tmpo Lap2,Tmpo Lap2	ENSMUST00000072239 ENSMUST00000092219 ENSMUST00000099355 ENSMUST00000105293,ENSMUST00000020123	ENSMUSP00000072092,ENSMUSP00000020123	ENSMUSG00000019961,ENSMUSG00000019961	10757.9	11332.8	10183.1	-0.154319	0.0100228	0.154673
ENSMUSG00000045838	chr2	118754158	118762661	-	A430105I19Rik	protein_coding	A3KGF9 Q3UV54 Q6DI90	CO052_MOUSE	Uncharacterized protein C15orf52 homolog		ENSMUST00000059997	ENSMUSP00000051853	ENSMUSG00000045838	495.894	434.262	557.526	0.359739	0.010033	0.154673
ENSMUSG00000050069	chr1	174833785	174921819	-	Grem2	protein_coding	O88273	GREM2_MOUSE	Gremlin-2	Grem2 Cktsf1b2 Prdc	ENSMUST00000055294	ENSMUSP00000049640	ENSMUSG00000050069	539.667	478.475	600.859	0.327972	0.0100302	0.154673
ENSMUSG00000060090	chrX	20364481	20405653	+	Rp2h	protein_coding	Q9EPK2 Q8BLN8 Q8BVQ8 Q8BZP9	XRP2_MOUSE	Protein XRP2	Rp2 Rp2h	ENSMUST00000033372 ENSMUST00000115387 ENSMUST00000115391 ENSMUST00000133619 ENSMUST00000134349	ENSMUSP00000033372	ENSMUSG00000060090	1628.18	1752.46	1503.9	-0.220541	0.00999506	0.154673
ENSMUSG00000002297	chr5	8396973	8422716	-	Dbf4	protein_coding	E9PW04,F7AV51,Q9QZ41 B7ZNS0 Q3TQP4 Q3V1K2 Q6NSQ1 Q9CXF2	E9PW04_MOUSE,F7AV51_MOUSE,DBF4A_MOUSE	Protein DBF4 homolog A,Protein DBF4 homolog A,Protein DBF4 homolog A	Dbf4,Dbf4,Dbf4 Dbf4a	ENSMUST00000168500,ENSMUST00000163141,ENSMUST00000002368 ENSMUST00000171808	ENSMUSP00000132985,ENSMUSP00000129317,ENSMUSP00000002368	ENSMUSG00000002297,ENSMUSG00000002297,ENSMUSG00000002297	1790.96	1938.8	1643.13	-0.238585	0.0100743	0.15473
ENSMUSG00000056763	chr1	10037987	10136768	+	Cspp1	protein_coding	B2RX88 C7SBE3 C7SBE4 Q8CCQ4 Q8VE83 Q9CQD5,D3Z378,F6QJJ3	CSPP1_MOUSE,D3Z378_MOUSE,F6QJJ3_MOUSE	Centrosome and spindle pole associated protein 1,Centrosome and spindle pole-associated protein 1,Centrosome and spindle pole-associated protein 1	Cspp1 Cspp,Cspp1,Cspp1	ENSMUST00000071087 ENSMUST00000117415 ENSMUST00000118263 ENSMUST00000119714 ENSMUST00000122156,ENSMUST00000155974,ENSMUST00000149214	ENSMUSP00000068804,ENSMUSP00000117726,ENSMUSP00000119258	ENSMUSG00000056763,ENSMUSG00000056763,ENSMUSG00000056763	2633.76	2806.35	2461.16	-0.189287	0.0100569	0.15473
ENSMUSG00000063810	chr6	85587531	85702753	+	Alms1	protein_coding	Q8K4E0 E9QKT8 Q6A084 Q8C9N9	ALMS1_MOUSE	Alstrom syndrome protein 1 homolog	Alms1 Kiaa0328	ENSMUST00000072018	ENSMUSP00000071904	ENSMUSG00000063810	1171.76	1289.16	1054.36	-0.289818	0.0100793	0.15473
ENSMUSG00000026832	chr2	58129137	58195532	-	Cytip	protein_coding	Q91VY6 A2AS77 Q3TZH1 Q8R4T4 Q9QZA9	CYTIP_MOUSE	Cytohesin-interacting protein	Cytip Pscdbp	ENSMUST00000028175	ENSMUSP00000028175	ENSMUSG00000026832	298.45	252.35	344.55	0.447764	0.0101246	0.154987
ENSMUSG00000031167	chrX	8138975	8145880	-	Rbm3	protein_coding	O89086,Q8BG13,S4R2M6	RBM3_MOUSE,Q8BG13_MOUSE,S4R2M6_MOUSE	Putative RNA-binding protein 3,Putative RNA-binding protein 3 Rbm3 protein,MCG116386, isoform CRA_c Putative RNA-binding protein 3	Rbm3,Rbm3,Rbm3 mCG_116386	ENSMUST00000115615 ENSMUST00000115619 ENSMUST00000115621,ENSMUST00000040010 ENSMUST00000115616 ENSMUST00000115617,ENSMUST00000129947 ENSMUST00000141629	ENSMUSP00000111277,ENSMUSP00000038964,ENSMUSP00000138456	ENSMUSG00000031167,ENSMUSG00000031167,ENSMUSG00000031167	5514.06	5826.5	5201.61	-0.163642	0.0101119	0.154987
ENSMUSG00000026103	chr1	52163448	52233232	-	Gls	protein_coding	D3Z7P3 E9PUF0 Q69ZX9,D3Z7P4,D3Z7P5,F6RDM4,F6U529,F7B327	GLSK_MOUSE,D3Z7P4_MOUSE,D3Z7P5_MOUSE,F6RDM4_MOUSE,F6U529_MOUSE,F7B327_MOUSE	Glutaminase kidney isoform, mitochondrial,Glutaminase kidney isoform, mitochondrial,Glutaminase kidney isoform, mitochondrial,Glutaminase kidney isoform, mitochondrial,Glutaminase kidney isoform, mitochondrial,Glutaminase kidney isoform, mitochondrial	Gls Gls1 Kiaa0838,Gls,Gls,Gls,Gls,Gls	ENSMUST00000114510 ENSMUST00000114513,ENSMUST00000114512,ENSMUST00000114509,ENSMUST00000129107,ENSMUST00000155587,ENSMUST00000156887	ENSMUSP00000110155,ENSMUSP00000110157,ENSMUSP00000110154,ENSMUSP00000121408,ENSMUSP00000115358,ENSMUSP00000116901	ENSMUSG00000026103,ENSMUSG00000026103,ENSMUSG00000026103,ENSMUSG00000026103,ENSMUSG00000026103,ENSMUSG00000026103	4190.06	4447.16	3932.95	-0.177229	0.01015	0.155076
ENSMUSG00000034192	chr6	91515928	91522625	+	Lsm3	protein_coding	P62311 Q9Y4Z1	LSM3_MOUSE	U6 snRNA-associated Sm-like protein LSm3	Lsm3	ENSMUST00000040607	ENSMUSP00000044178	ENSMUSG00000034192	1108.26	1207.86	1008.65	-0.259791	0.0101588	0.155076
ENSMUSG00000028078	chr3	86786151	86920852	-	Dclk2	protein_coding	Q6PGN3 Q1EDG7 Q1EDG8 Q4H483 Q4W8V1 Q8BUU0 Q8BX25	DCLK2_MOUSE	Serine/threonine-protein kinase DCLK2	Dclk2 Dcamkl2	ENSMUST00000029719	ENSMUSP00000029719	ENSMUSG00000028078	647.767	717.374	578.16	-0.310773	0.0103058	0.156961
ENSMUSG00000039157	chr2	32535332	32569756	+	Fam102a	protein_coding	A2ASZ6,A2ASZ7,Q78T81 Q8K2K5	A2ASZ6_MOUSE,A2ASZ7_MOUSE,F102A_MOUSE	Protein FAM102A,Protein FAM102A,Protein FAM102A	Fam102a,Fam102a,Fam102a	ENSMUST00000133512,ENSMUST00000133366,ENSMUST00000048375	ENSMUSP00000116809,ENSMUSP00000118624,ENSMUSP00000044731	ENSMUSG00000039157,ENSMUSG00000039157,ENSMUSG00000039157	1797.66	1668.39	1926.93	0.207735	0.0103112	0.156961
ENSMUSG00000021286	chr12	111814170	111828388	+	Zfyve21	protein_coding	Q8VCM3 A3KML1 Q3TBQ9 Q9D1E2	ZFY21_MOUSE	Zinc finger FYVE domain-containing protein 21	Zfyve21	ENSMUST00000021714	ENSMUSP00000021714	ENSMUSG00000021286	1344	1230.43	1457.57	0.244222	0.0104472	0.157224
ENSMUSG00000028256	chr3	145118588	145153915	+	Odf2l	protein_coding	Q9D478 Q8CD32 Q8VDY5 Q9D647	ODF2L_MOUSE	Outer dense fiber protein 2-like	Odf2l D3Ertd250e	ENSMUST00000029920 ENSMUST00000098538 ENSMUST00000098539 ENSMUST00000106192	ENSMUSP00000029920	ENSMUSG00000028256	1446.92	1573.44	1320.39	-0.25279	0.010463	0.157224
ENSMUSG00000029209	chr5	69573108	69592340	-	Gnpda2	protein_coding	D3YWR1,D6RCJ1,G3UXF5,Q9CRC9 Q3TH02 Q9D457	D3YWR1_MOUSE,D6RCJ1_MOUSE,G3UXF5_MOUSE,GNPI2_MOUSE	Glucosamine-6-phosphate isomerase 2,Glucosamine-6-phosphate isomerase 2,Glucosamine-6-phosphate isomerase 2,Glucosamine-6-phosphate isomerase 2	Gnpda2,Gnpda2,Gnpda2,Gnpda2 Kiaa4008	ENSMUST00000120789,ENSMUST00000153536,ENSMUST00000174233,ENSMUST00000031117 ENSMUST00000139632 ENSMUST00000166298 ENSMUST00000173927	ENSMUSP00000112484,ENSMUSP00000121441,ENSMUSP00000133670,ENSMUSP00000031117	ENSMUSG00000029209,ENSMUSG00000029209,ENSMUSG00000029209,ENSMUSG00000029209	796.664	877.291	716.037	-0.292651	0.0104094	0.157224
ENSMUSG00000029313	chr5	103692374	103855322	+	Aff1	protein_coding	A3KMF4,B1AVP1,E9Q921	A3KMF4_MOUSE,B1AVP1_MOUSE,E9Q921_MOUSE	AF4/FMR2 family member 1 Aff1 protein,AF4/FMR2 family member 1,AF4/FMR2 family member 1	Aff1,Aff1,Aff1	ENSMUST00000054979,ENSMUST00000153165,ENSMUST00000031256	ENSMUSP00000059744,ENSMUSP00000119631,ENSMUSP00000031256	ENSMUSG00000029313,ENSMUSG00000029313,ENSMUSG00000029313	2319.65	2162.83	2476.48	0.195291	0.0104347	0.157224
ENSMUSG00000030087	chr6	90462576	90475238	+	Klf15	protein_coding	Q9EPW2 Q3UQB0	KLF15_MOUSE	Krueppel-like factor 15	Klf15 Cklf	ENSMUST00000032174 ENSMUST00000113530	ENSMUSP00000032174	ENSMUSG00000030087	704.24	626.154	782.327	0.320795	0.0104677	0.157224
ENSMUSG00000031278	chrX	142317993	142390535	-	Acsl4	protein_coding	Q9QUJ7 Q5D071 Q9JHT4 Q9R0H3	ACSL4_MOUSE	Long-chain-fatty-acid--CoA ligase 4	Acsl4 Acs4 Facl4	ENSMUST00000033634 ENSMUST00000112903 ENSMUST00000112904 ENSMUST00000112907	ENSMUSP00000033634	ENSMUSG00000031278	2632.26	2459.74	2804.77	0.189306	0.0104729	0.157224
ENSMUSG00000036902	chr8	85636588	85690973	-	Neto2	protein_coding	Q8BNJ6 B2RX93 Q5VM49 Q8C4Q8	NETO2_MOUSE	Neuropilin and tolloid-like protein 2	Neto2 Btcl2	ENSMUST00000109686	ENSMUSP00000105308	ENSMUSG00000036902	333.732	380.178	287.287	-0.402963	0.0104704	0.157224
ENSMUSG00000040997	chr14	54254188	54270637	+	Abhd4	protein_coding	Q3U7M5,Q8C0M2	Q3U7M5_MOUSE,Q8C0M2_MOUSE	Abhydrolase domain-containing protein 4,Abhydrolase domain-containing protein 4	Abhd4,Abhd4	ENSMUST00000041197,ENSMUST00000180359	ENSMUSP00000044134,ENSMUSP00000137214	ENSMUSG00000040997,ENSMUSG00000040997	1991.25	1847.66	2134.84	0.20832	0.0104593	0.157224
ENSMUSG00000042812	chr8	121084386	121088144	+	Foxf1	protein_coding	Q61080 B2RSC1 Q61661	FOXF1_MOUSE	Forkhead box protein F1	Foxf1 Fkhl5 Foxf1a Freac1 Hfh8	ENSMUST00000050684 ENSMUST00000181504	ENSMUSP00000057481	ENSMUSG00000042812	3614.96	3391.23	3838.7	0.178759	0.0104011	0.157224
ENSMUSG00000053550	chr7	4825552	4844696	-	Shisa7	protein_coding	F6T9T6,Q8C3Q5 Q3UMB3	F6T9T6_MOUSE,SHSA7_MOUSE	Protein shisa-7,Protein shisa-7	Shisa7,Shisa7	ENSMUST00000117452,ENSMUST00000066041 ENSMUST00000119433 ENSMUST00000172377	ENSMUSP00000112405,ENSMUSP00000064886	ENSMUSG00000053550,ENSMUSG00000053550	504.028	566.079	441.977	-0.356318	0.0103538	0.157224
ENSMUSG00000024644	chr18	84667470	84685633	-	Cndp2	protein_coding	Q9D1A2 Q3TA80 Q3TI32 Q3U7B9 Q99PV1	CNDP2_MOUSE	Cytosolic non-specific dipeptidase	Cndp2 Cn2	ENSMUST00000025546 ENSMUST00000168419	ENSMUSP00000025546	ENSMUSG00000024644	1106.55	1012.4	1200.71	0.245889	0.010491	0.157279
ENSMUSG00000026683	chr1	169497934	169531464	-	Nuf2	protein_coding	Q99P69 Q8BTK7 Q8VE05 Q9CST5	NUF2_MOUSE	Kinetochore protein Nuf2	Nuf2 Cdca1 Nuf2r	ENSMUST00000028000 ENSMUST00000111368	ENSMUSP00000028000	ENSMUSG00000026683	1626.99	1748.84	1505.14	-0.216364	0.0105184	0.157472
ENSMUSG00000028484	chr4	83455680	83486459	-	Psip1	protein_coding	A2BI12,F6RB63,F6W677,Q99JF8 A2BI10 A2BI11 Q3TEJ7 Q3TTD7 Q3UTA1 Q80WQ7 Q99JF7 Q99LR4 Q9CT03	A2BI12_MOUSE,F6RB63_MOUSE,F6W677_MOUSE,PSIP1_MOUSE	PC4 and SFRS1-interacting protein,PC4 and SFRS1-interacting protein,PC4 and SFRS1-interacting protein,PC4 and SFRS1-interacting protein	Psip1,Psip1,Psip1,Psip1 Ledgf	ENSMUST00000107214,ENSMUST00000130626,ENSMUST00000126706,ENSMUST00000030207 ENSMUST00000107215	ENSMUSP00000102832,ENSMUSP00000121950,ENSMUSP00000120799,ENSMUSP00000030207	ENSMUSG00000028484,ENSMUSG00000028484,ENSMUSG00000028484,ENSMUSG00000028484	3672.17	3902.04	3442.3	-0.180806	0.0106137	0.158681
ENSMUSG00000028393	chr4	62509169	62519918	-	Alad	protein_coding	P10518 Q3THV6	HEM2_MOUSE	Delta-aminolevulinic acid dehydratase	Alad Lv	ENSMUST00000030090 ENSMUST00000107444	ENSMUSP00000030090	ENSMUSG00000028393	1925.45	1771.54	2079.35	0.231011	0.0106397	0.158811
ENSMUSG00000031112	chrX	50841047	50893097	+	Stk26	protein_coding	A2AD84,Q99JT2	A2AD84_MOUSE,MST4_MOUSE	Protein 2610018G03Rik,Serine/threonine-protein kinase MST4	2610018G03Rik,Mst4	ENSMUST00000114887,ENSMUST00000033444	ENSMUSP00000110537,ENSMUSP00000033444	ENSMUSG00000031112,ENSMUSG00000031112	882.213	969.019	795.406	-0.28451	0.010664	0.158811
ENSMUSG00000032577	chr9	107254927	107289877	-	Mapkapk3	protein_coding	B0QZU6,Q3UMW7 B0QZU7 E9QNE1 Q3T9E6 Q8K0G3	B0QZU6_MOUSE,MAPK3_MOUSE	MAP kinase-activated protein kinase 3,MAP kinase-activated protein kinase 3	Mapkapk3,Mapkapk3	ENSMUST00000134682 ENSMUST00000151190,ENSMUST00000035194	ENSMUSP00000120848,ENSMUSP00000035194	ENSMUSG00000032577,ENSMUSG00000032577	973.011	885.64	1060.38	0.259522	0.0106662	0.158811
ENSMUSG00000032038	chr9	35046579	35116810	-	St3gal4	protein_coding	Q91Y74	SIA4C_MOUSE	CMP-N-acetylneuraminate-beta-galactosamide-alpha-2,3-sialyltransferase 4	St3gal4 Siat4c	ENSMUST00000034537	ENSMUSP00000034537	ENSMUSG00000032038	1271.49	1167.78	1375.2	0.235682	0.0106954	0.159029
ENSMUSG00000027981	chr3	113605067	113630149	-	Rnpc3	protein_coding	F6TN13,Q3UZ01 Q3TTZ2 Q69Z94 Q80VS9 Q91YJ1 Q9CSC1	F6TN13_MOUSE,RBM40_MOUSE	RNA-binding protein 40,RNA-binding protein 40	Rnpc3,Rnpc3 Kiaa1839 Rbm40	ENSMUST00000153853,ENSMUST00000092154 ENSMUST00000106535 ENSMUST00000106536	ENSMUSP00000115492,ENSMUSP00000089792	ENSMUSG00000027981,ENSMUSG00000027981	1312.16	1421.33	1203	-0.240417	0.0107281	0.159297
ENSMUSG00000059921	chr3	141465216	141834924	+	Unc5c	protein_coding	E9PVI4,O08747 Q8CD16	E9PVI4_MOUSE,UNC5C_MOUSE	Netrin receptor UNC5C,Netrin receptor UNC5C	Unc5c,Unc5c Rcm Unc5h3	ENSMUST00000130636,ENSMUST00000075282 ENSMUST00000106236 ENSMUST00000142762	ENSMUSP00000117487,ENSMUSP00000074758	ENSMUSG00000059921,ENSMUSG00000059921	3189.99	3423.77	2956.21	-0.211773	0.010856	0.160976
ENSMUSG00000017132	chr11	118132019	118248592	-	Cyth1	protein_coding	A2A517,B1AQE4,Q3TZ02,Q9QX11 O88817 Q76MU4	A2A517_MOUSE,B1AQE4_MOUSE,Q3TZ02_MOUSE,CYH1_MOUSE	Cytohesin-1 Pleckstrin homology, Sec7 and coiled-coil domains 1, isoform CRA_b,Cytohesin-1,Cytohesin-1,Cytohesin-1	Cyth1 Pscd1 mCG_142715,Cyth1,Cyth1 Pscd1,Cyth1 Pscd1	ENSMUST00000100181,ENSMUST00000151165,ENSMUST00000106302,ENSMUST00000017276 ENSMUST00000106305	ENSMUSP00000097756,ENSMUSP00000114792,ENSMUSP00000101909,ENSMUSP00000017276	ENSMUSG00000017132,ENSMUSG00000017132,ENSMUSG00000017132,ENSMUSG00000017132	1369.57	1260.96	1478.18	0.229134	0.0109026	0.161447
ENSMUSG00000022034	chr14	65819038	65833994	-	Esco2	protein_coding	Q8CIB9 Q3UMT6 Q6IQX5 Q8BNG9 Q8BQF8 Q9CRI8	ESCO2_MOUSE	N-acetyltransferase ESCO2	Esco2	ENSMUST00000022613	ENSMUSP00000022613	ENSMUSG00000022034	1165.95	1265.17	1066.73	-0.245935	0.0109329	0.161676
ENSMUSG00000005251	chr16	97741933	97763737	-	Ripk4	protein_coding	D3YXY4,Q9ERK0 Q3UM04	D3YXY4_MOUSE,RIPK4_MOUSE	Receptor-interacting serine/threonine-protein kinase 4,Receptor-interacting serine/threonine-protein kinase 4	Ripk4,Ripk4 Ankrd3 Pkk	ENSMUST00000113743,ENSMUST00000019386	ENSMUSP00000109372,ENSMUSP00000019386	ENSMUSG00000005251,ENSMUSG00000005251	759.462	685.339	833.585	0.282137	0.0109789	0.162136
ENSMUSG00000070306	chr9	44240677	44247306	+	Ccdc153	protein_coding	P0C7Q1	CC153_MOUSE	Coiled-coil domain-containing protein 153	Ccdc153	ENSMUST00000092426	ENSMUSP00000090082	ENSMUSG00000070306	439.489	379.676	499.301	0.394231	0.0110157	0.16246
ENSMUSG00000000530	chr15	101128522	101145336	+	Acvrl1	protein_coding	D3YUY5,D3Z7H9,Q61288 Q61289 Q91YR0	D3YUY5_MOUSE,D3Z7H9_MOUSE,ACVL1_MOUSE	Serine/threonine-protein kinase receptor R3,Serine/threonine-protein kinase receptor R3,Serine/threonine-protein kinase receptor R3	Acvrl1,Acvrl1,Acvrl1 Acvrlk1 Alk-1	ENSMUST00000124151,ENSMUST00000130432,ENSMUST00000000542 ENSMUST00000117984 ENSMUST00000119063 ENSMUST00000120028 ENSMUST00000120754 ENSMUST00000121718	ENSMUSP00000114829,ENSMUSP00000122998,ENSMUSP00000000542	ENSMUSG00000000530,ENSMUSG00000000530,ENSMUSG00000000530	5091.45	4805.95	5376.95	0.161936	0.0110629	0.162934
ENSMUSG00000021413	chr13	34875494	34902877	+	Prpf4b	protein_coding	Q61136 B2RUN6 O88378 Q8BND8 Q8R4Y5 Q9CTL9 Q9CTT0	PRP4B_MOUSE	Serine/threonine-protein kinase PRP4 homolog	Prpf4b Cbp143 Prp4h Prp4k Prp4m Prpk	ENSMUST00000077853	ENSMUSP00000077019	ENSMUSG00000021413	5655.99	6016.78	5295.19	-0.184276	0.0111199	0.163151
ENSMUSG00000025369	chr10	128459236	128490173	+	Smarcc2	protein_coding	Q3UID0,Q6PDG5 Q6P6P3	Q3UID0_MOUSE,SMRC2_MOUSE	SWI/SNF complex subunit SMARCC2,SWI/SNF complex subunit SMARCC2	Smarcc2,Smarcc2 Baf170	ENSMUST00000099131,ENSMUST00000026433 ENSMUST00000105235	ENSMUSP00000096734,ENSMUSP00000026433	ENSMUSG00000025369,ENSMUSG00000025369	6375.16	6741.69	6008.62	-0.16605	0.0111226	0.163151
ENSMUSG00000044807	chr11	50811086	50827724	-	Zfp354c	protein_coding	Q571J5 Q3UKS9 Q8C365 Q9JLD3	Z354C_MOUSE	Zinc finger protein 354C	Znf354c Kiaa4218 Kid3 Zfp354c	ENSMUST00000000632 ENSMUST00000109135	ENSMUSP00000000632	ENSMUSG00000044807	1760.92	1889.36	1632.47	-0.210727	0.0111217	0.163151
ENSMUSG00000000628	chr6	82725025	82774454	-	Hk2	protein_coding	E9Q5B5,E9Q9M6,O08528	E9Q5B5_MOUSE,E9Q9M6_MOUSE,HXK2_MOUSE	Hexokinase-2,Hexokinase-2,Hexokinase-2	Hk2,Hk2,Hk2	ENSMUST00000170833,ENSMUST00000169270,ENSMUST00000000642	ENSMUSP00000125986,ENSMUSP00000128572,ENSMUSP00000000642	ENSMUSG00000000628,ENSMUSG00000000628,ENSMUSG00000000628	777.96	700.716	855.203	0.287066	0.0111801	0.163774
ENSMUSG00000019942	chr10	69336635	69352938	-	Cdk1	protein_coding	D3Z2T9,P11440 P70337 Q3TI12	D3Z2T9_MOUSE,CDK1_MOUSE	Cyclin-dependent kinase 1,Cyclin-dependent kinase 1	Cdk1,Cdk1 Cdc2 Cdc2a Cdkn1	ENSMUST00000152448,ENSMUST00000020099 ENSMUST00000119827	ENSMUSP00000119085,ENSMUSP00000020099	ENSMUSG00000019942,ENSMUSG00000019942	4192.61	4432.4	3952.83	-0.165166	0.0112651	0.163944
ENSMUSG00000020717	chr11	106654217	106750628	-	Pecam1	protein_coding	B1ARA9,B1ARB3,Q08481 B1ARB1 B1ARB2 Q3TES6 Q922E0	B1ARA9_MOUSE,B1ARB3_MOUSE,PECA1_MOUSE	Platelet endothelial cell adhesion molecule,Platelet endothelial cell adhesion molecule Platelet/endothelial cell adhesion molecule 1, isoform CRA_d,Platelet endothelial cell adhesion molecule	Pecam1,Pecam1 mCG_2881,Pecam1 Pecam Pecam-1	ENSMUST00000124958,ENSMUST00000068021,ENSMUST00000080853 ENSMUST00000103069 ENSMUST00000106796 ENSMUST00000183610	ENSMUSP00000122414,ENSMUSP00000067111,ENSMUSP00000079664	ENSMUSG00000020717,ENSMUSG00000020717,ENSMUSG00000020717	8953.57	8492.55	9414.59	0.148684	0.0112902	0.163944
ENSMUSG00000024989	chr19	38055025	38074425	+	Cep55	protein_coding	Q8BT07 Q8C2J0 Q8K2I8 Q8R2Y4 Q9DBZ8	CEP55_MOUSE	Centrosomal protein of 55 kDa	Cep55	ENSMUST00000096096 ENSMUST00000116506 ENSMUST00000169673	ENSMUSP00000093802	ENSMUSG00000024989	1529.31	1644.72	1413.9	-0.218018	0.0112388	0.163944
ENSMUSG00000025529	chrX	112600526	112635070	+	Zfp711	protein_coding	E9PUP8,F6VDX0,F8WGY3	E9PUP8_MOUSE,F6VDX0_MOUSE,F8WGY3_MOUSE	Zinc finger protein 711,Zinc finger protein 711,Zinc finger protein 711	Zfp711,Zfp711,Zfp711	ENSMUST00000113409,ENSMUST00000122805,ENSMUST00000071814	ENSMUSP00000109036,ENSMUSP00000118117,ENSMUSP00000071717	ENSMUSG00000025529,ENSMUSG00000025529,ENSMUSG00000025529	971.091	1057.67	884.512	-0.257668	0.0112882	0.163944
ENSMUSG00000028702	chr4	116094264	116123690	-	Rad54l	protein_coding	P70270 Q8BSR5 Q8C2C4 Q8K3D4	RAD54_MOUSE	DNA repair and recombination protein RAD54-like	Rad54l Rad54	ENSMUST00000102704 ENSMUST00000102705	ENSMUSP00000099765	ENSMUSG00000028702	533.55	597.972	469.129	-0.349432	0.0113377	0.163944
ENSMUSG00000029311	chr5	103989762	104021919	-	Hsd17b11	protein_coding	Q9EQ06 Q3U2P6 Q8BR33 Q8C7S0	DHB11_MOUSE	Estradiol 17-beta-dehydrogenase 11	Hsd17b11 Dhrs8 Pan1b	ENSMUST00000031251 ENSMUST00000119025	ENSMUSP00000031251	ENSMUSG00000029311	1375.12	1260.91	1489.34	0.240034	0.0113423	0.163944
ENSMUSG00000029513	chr5	116013586	116024508	-	Prkab1	protein_coding	Q9R078 Q91YN6,S4R2R1	AAKB1_MOUSE,S4R2R1_MOUSE	5'-AMP-activated protein kinase subunit beta-1,5'-AMP-activated protein kinase subunit beta-1 Protein kinase, AMP-activated, beta 1 non-catalytic subunit, isoform CRA_a	Prkab1,Prkab1 mCG_20709	ENSMUST00000031486 ENSMUST00000111999,ENSMUST00000133098 ENSMUST00000148208	ENSMUSP00000031486,ENSMUSP00000138749	ENSMUSG00000029513,ENSMUSG00000029513	1947.78	1806.33	2089.23	0.209801	0.0113245	0.163944
ENSMUSG00000030562	chr7	87246096	87398710	+	Nox4	protein_coding	D3Z2E1,Q9JHI8 Q3TF39 Q8C3M1 Q8VCA3,S4R1R3	D3Z2E1_MOUSE,NOX4_MOUSE,S4R1R3_MOUSE	NADPH oxidase 4,NADPH oxidase 4,NADPH oxidase 4	Nox4,Nox4 Renox,Nox4	ENSMUST00000124057,ENSMUST00000032781 ENSMUST00000068829,ENSMUST00000126887 ENSMUST00000136577 ENSMUST00000144267	ENSMUSP00000119365,ENSMUSP00000032781,ENSMUSP00000138336	ENSMUSG00000030562,ENSMUSG00000030562,ENSMUSG00000030562	1150.71	1246.89	1054.54	-0.241506	0.0113065	0.163944
ENSMUSG00000038871	chr6	34476207	34505613	+	Bpgm	protein_coding	D3YUE8,D3YYH3,D3Z223,P15327 Q543Z6	D3YUE8_MOUSE,D3YYH3_MOUSE,D3Z223_MOUSE,PMGE_MOUSE	Phosphoglycerate mutase,Phosphoglycerate mutase,Phosphoglycerate mutase,Bisphosphoglycerate mutase	Bpgm,Bpgm,Bpgm,Bpgm	ENSMUST00000139067,ENSMUST00000138668,ENSMUST00000149131,ENSMUST00000045372	ENSMUSP00000120794,ENSMUSP00000115825,ENSMUSP00000121818,ENSMUSP00000047393	ENSMUSG00000038871,ENSMUSG00000038871,ENSMUSG00000038871,ENSMUSG00000038871	1504.63	1378.07	1631.19	0.243118	0.0113342	0.163944
ENSMUSG00000057113	chr11	33152287	33163206	-	Npm1	protein_coding	Q5SQB0,Q5SQB5,Q61937,Q9DAY9	Q5SQB0_MOUSE,Q5SQB5_MOUSE,NPM_MOUSE,Q9DAY9_MOUSE	Nucleophosmin,Nucleophosmin,Nucleophosmin,Nucleophosmin	Npm1,Npm1,Npm1,Npm1	ENSMUST00000093201,ENSMUST00000101375,ENSMUST00000075641,ENSMUST00000109354	ENSMUSP00000090891,ENSMUSP00000098926,ENSMUSP00000075067,ENSMUSP00000104978	ENSMUSG00000057113,ENSMUSG00000057113,ENSMUSG00000057113,ENSMUSG00000057113	14281.4	14990.5	13572.3	-0.143375	0.0112935	0.163944
ENSMUSG00000055320	chr7	112679318	112906807	+	Tead1	protein_coding	E9PVJ5,E9PVS2,E9PZ73,E9Q387,E9QAK6,F6QH05,Q3UFP5,Q3USK5,Q6PAQ8 E9Q681	E9PVJ5_MOUSE,E9PVS2_MOUSE,E9PZ73_MOUSE,E9Q387_MOUSE,E9QAK6_MOUSE,F6QH05_MOUSE,Q3UFP5_MOUSE,Q3USK5_MOUSE,Q6PAQ8_MOUSE	Transcriptional enhancer factor TEF-1,Transcriptional enhancer factor TEF-1,Transcriptional enhancer factor TEF-1,Transcriptional enhancer factor TEF-1,Transcriptional enhancer factor TEF-1,Transcriptional enhancer factor TEF-1,TEA domain family member 1, isoform CRA_a Transcriptional enhancer factor TEF-1,Transcriptional enhancer factor TEF-1,Tead1 protein Transcriptional enhancer factor TEF-1	Tead1,Tead1,Tead1,Tead1,Tead1,Tead1,Tead1 mCG_15837,Tead1,Tead1	ENSMUST00000171373,ENSMUST00000168981,ENSMUST00000165036,ENSMUST00000170352,ENSMUST00000171197,ENSMUST00000167060,ENSMUST00000106638,ENSMUST00000059768 ENSMUST00000164363,ENSMUST00000069256 ENSMUST00000084705	ENSMUSP00000131765,ENSMUSP00000133025,ENSMUSP00000131221,ENSMUSP00000129798,ENSMUSP00000128439,ENSMUSP00000130564,ENSMUSP00000102249,ENSMUSP00000060671,ENSMUSP00000130459	ENSMUSG00000055320,ENSMUSG00000055320,ENSMUSG00000055320,ENSMUSG00000055320,ENSMUSG00000055320,ENSMUSG00000055320,ENSMUSG00000055320,ENSMUSG00000055320,ENSMUSG00000055320	7096.67	7501	6692.34	-0.164549	0.0113875	0.164378
ENSMUSG00000020277	chr10	77986947	78010083	-	Pfkl	protein_coding	P12382 Q8VDX7	K6PL_MOUSE	6-phosphofructokinase, liver type	Pfkl Pfk-l Pfkb	ENSMUST00000020522	ENSMUSP00000020522	ENSMUSG00000020277	2857.68	2662.87	3052.48	0.196932	0.0114897	0.165322
ENSMUSG00000021998	chr14	75131101	75230842	+	Lcp1	protein_coding	D3YVW8,D3YZ25,D3Z311,D3Z7D9,Q61233 Q3UE24 Q8R1X3 Q9CV77	D3YVW8_MOUSE,D3YZ25_MOUSE,D3Z311_MOUSE,D3Z7D9_MOUSE,PLSL_MOUSE	Plastin-2,Plastin-2,Plastin-2,Plastin-2,Plastin-2	Lcp1,Lcp1,Lcp1,Lcp1,Lcp1 Pls2	ENSMUST00000122840,ENSMUST00000143539,ENSMUST00000134114,ENSMUST00000125833,ENSMUST00000124499 ENSMUST00000131802 ENSMUST00000145303	ENSMUSP00000117984,ENSMUSP00000118721,ENSMUSP00000121376,ENSMUSP00000116033,ENSMUSP00000121201	ENSMUSG00000021998,ENSMUSG00000021998,ENSMUSG00000021998,ENSMUSG00000021998,ENSMUSG00000021998	4106.14	3859.23	4353.06	0.173674	0.0114984	0.165322
ENSMUSG00000043336	chr16	57353093	57573126	+	Filip1l	protein_coding	E0CYH7,E0CYM1,Q6P6L0 B2ZAA3 B3GM33 Q05CK4 Q3UIY5 Q4G0B9	E0CYH7_MOUSE,E0CYM1_MOUSE,FIL1L_MOUSE	Filamin A-interacting protein 1-like,Filamin A-interacting protein 1-like,Filamin A-interacting protein 1-like	Filip1l,Filip1l,Filip1l Doc1	ENSMUST00000159816,ENSMUST00000159414,ENSMUST00000099667	ENSMUSP00000124179,ENSMUSP00000124069,ENSMUSP00000133252	ENSMUSG00000043336,ENSMUSG00000043336,ENSMUSG00000043336	1695.66	1826.86	1564.46	-0.223576	0.01149	0.165322
ENSMUSG00000001946	chr9	37528078	37538319	+	Esam	protein_coding	D3YV70,D3Z5S5,D3Z5Y0,Q925F2	D3YV70_MOUSE,D3Z5S5_MOUSE,D3Z5Y0_MOUSE,ESAM_MOUSE	Endothelial cell-selective adhesion molecule,Endothelial cell-selective adhesion molecule,Endothelial cell-selective adhesion molecule,Endothelial cell-selective adhesion molecule	Esam,Esam,Esam,Esam Esam1	ENSMUST00000144596,ENSMUST00000123198,ENSMUST00000146860,ENSMUST00000002011	ENSMUSP00000114632,ENSMUSP00000116300,ENSMUSP00000122473,ENSMUSP00000002011	ENSMUSG00000001946,ENSMUSG00000001946,ENSMUSG00000001946,ENSMUSG00000001946	3627.18	3394.91	3859.45	0.184968	0.011523	0.165457
ENSMUSG00000054770	chr1	57955101	58018956	-	Kctd18	protein_coding	E0CXJ5,E0CZ26,E9PYP3,E9Q945	E0CXJ5_MOUSE,E0CZ26_MOUSE,E9PYP3_MOUSE,E9Q945_MOUSE	Protein Kctd18,Potassium channel tetramerisation domain containing 18, isoform CRA_a Protein Kctd18,Protein Kctd18,Protein Kctd18	Kctd18,Kctd18 mCG_117471,Kctd18,Kctd18	ENSMUST00000159826,ENSMUST00000114410,ENSMUST00000161608 ENSMUST00000163061,ENSMUST00000164963	ENSMUSP00000125245,ENSMUSP00000110052,ENSMUSP00000125153,ENSMUSP00000130952	ENSMUSG00000054770,ENSMUSG00000054770,ENSMUSG00000054770,ENSMUSG00000054770	1015.48	1103.67	927.291	-0.250961	0.0115648	0.165838
ENSMUSG00000033389	chr11	65002039	65162961	-	Arhgap44	protein_coding	F6T1Y2,Q5SSM3 Q5SSM4 Q5SSM6 Q5SSM7 Q7TNB9 Q8BW90	F6T1Y2_MOUSE,RHG44_MOUSE	Rho GTPase-activating protein 44,Rho GTPase-activating protein 44	Arhgap44,Arhgap44 Rich2	ENSMUST00000130420,ENSMUST00000047463 ENSMUST00000093001 ENSMUST00000093002	ENSMUSP00000115612,ENSMUSP00000039139	ENSMUSG00000033389,ENSMUSG00000033389	1947.15	1812	2082.31	0.200498	0.011623	0.166235
ENSMUSG00000051378	chr11	102905529	102925124	-	Kif18b	protein_coding	Q6PFD6 Q3U0T0 Q80V20	KI18B_MOUSE	Kinesin-like protein KIF18B	Kif18b	ENSMUST00000021311	ENSMUSP00000021311	ENSMUSG00000051378	1017.71	1105.62	929.802	-0.249618	0.0116174	0.166235
ENSMUSG00000022799	chr16	38598340	38713274	-	Arhgap31	protein_coding	A6X8Z5 Q3TL91 Q3U1T7 Q3UDE7 Q3UUH4 Q6ZPW0 Q9WV94	RHG31_MOUSE	Rho GTPase-activating protein 31	Arhgap31 Cdgap Kiaa1204	ENSMUST00000023487	ENSMUSP00000023487	ENSMUSG00000022799	4371.86	4090.72	4652.99	0.185762	0.0117498	0.167828
ENSMUSG00000047963	chr5	92603041	92606579	+	Stbd1	protein_coding	Q8C7E7 Q147T8	STBD1_MOUSE	Starch-binding domain-containing protein 1	Stbd1 D5Ertd593e	ENSMUST00000050952	ENSMUSP00000054322	ENSMUSG00000047963	4191.32	3909.58	4473.06	0.194202	0.0118271	0.16871
ENSMUSG00000001986	chrX	41400854	41678601	+	Gria3	protein_coding	B0QZW1,B0QZW2,F2Z488,Q9Z2W9 A2VDF4 Q5DTJ0	B0QZW1_MOUSE,B0QZW2_MOUSE,F2Z488_MOUSE,GRIA3_MOUSE	Glutamate receptor 3,Glutamate receptor 3,Glutamate receptor 3,Glutamate receptor 3	Gria3,Gria3,Gria3,Gria3 Glur3 Kiaa4184	ENSMUST00000115103 ENSMUST00000165288,ENSMUST00000124169,ENSMUST00000139965,ENSMUST00000076349	ENSMUSP00000110755,ENSMUSP00000117766,ENSMUSP00000116381,ENSMUSP00000075687	ENSMUSG00000001986,ENSMUSG00000001986,ENSMUSG00000001986,ENSMUSG00000001986	1852.53	1986.6	1718.45	-0.209081	0.0118821	0.169273
ENSMUSG00000032540	chr9	122351608	122381524	+	Abhd5	protein_coding	D3Z7K3,H3BKV1,H3BLJ0,Q9DBL9 Q9CTY3	D3Z7K3_MOUSE,H3BKV1_MOUSE,H3BLJ0_MOUSE,ABHD5_MOUSE	1-acylglycerol-3-phosphate O-acyltransferase ABHD5,1-acylglycerol-3-phosphate O-acyltransferase ABHD5,1-acylglycerol-3-phosphate O-acyltransferase ABHD5 Abhydrolase domain containing 5, isoform CRA_c,1-acylglycerol-3-phosphate O-acyltransferase ABHD5	Abhd5,Abhd5,Abhd5 mCG_22628,Abhd5	ENSMUST00000154161,ENSMUST00000035128,ENSMUST00000175973,ENSMUST00000111497 ENSMUST00000156520	ENSMUSP00000122939,ENSMUSP00000135538,ENSMUSP00000135807,ENSMUSP00000107123	ENSMUSG00000032540,ENSMUSG00000032540,ENSMUSG00000032540,ENSMUSG00000032540	895.655	805.134	986.176	0.292289	0.0119569	0.170117
ENSMUSG00000037474	chr1	191537356	191575544	-	Dtl	protein_coding	Q3TLR7 Q3TTE9 Q6PAN1 Q80WY1 Q80WY2 Q8BW38 Q9CZ76	DTL_MOUSE	Denticleless protein homolog	Dtl Cdt2 L2dtl Ramp	ENSMUST00000027933	ENSMUSP00000027933	ENSMUSG00000037474	1573.24	1695.67	1450.8	-0.224867	0.0119853	0.170297
ENSMUSG00000040653	chr10	3366150	3464975	+	Ppp1r14c	protein_coding	Q8R4S0	PP14C_MOUSE	Protein phosphatase 1 regulatory subunit 14C	Ppp1r14c Kepi	ENSMUST00000043374	ENSMUSP00000045110	ENSMUSG00000040653	3482.8	3265.98	3699.62	0.179808	0.0120069	0.170383
ENSMUSG00000046671	chr4	134525550	134535387	-	Mtfr1l	protein_coding	D3YW54,D3Z0X8,D6RCX5,Q9CWE0 Q3UJK3 Q8BTP7	D3YW54_MOUSE,D3Z0X8_MOUSE,D6RCX5_MOUSE,MFR1L_MOUSE	Mitochondrial fission regulator 1-like,Mitochondrial fission regulator 1-like,Mitochondrial fission regulator 1-like,Mitochondrial fission regulator 1-like	Mtfr1l Fam54b,Mtfr1l Fam54b,Mtfr1l Fam54b,Mtfr1l Fam54b	ENSMUST00000154769,ENSMUST00000146808,ENSMUST00000131613,ENSMUST00000102550 ENSMUST00000116279	ENSMUSP00000117943,ENSMUSP00000120200,ENSMUSP00000123326,ENSMUSP00000099609	ENSMUSG00000046671,ENSMUSG00000046671,ENSMUSG00000046671,ENSMUSG00000046671	2379.96	2218.34	2541.57	0.196157	0.0120434	0.170677
ENSMUSG00000037416	chr18	49832670	49965473	+	Dmxl1	protein_coding	F8WGX5,Q6PNC0 Q3TLG8 Q6PHM6 Q8BQF2	F8WGX5_MOUSE,DMXL1_MOUSE	DmX-like protein 1,DmX-like protein 1	Dmxl1,Dmxl1	ENSMUST00000041772,ENSMUST00000180611	ENSMUSP00000045559,ENSMUSP00000137871	ENSMUSG00000037416,ENSMUSG00000037416	3583.93	3805.6	3362.26	-0.178644	0.0120907	0.171126
ENSMUSG00000033491	chr9	86743649	86758443	+	Prss35	protein_coding	Q8C0F9 Q8C0D6 Q8C0L5	PRS35_MOUSE	Inactive serine protease 35	Prss35	ENSMUST00000036426 ENSMUST00000179574	ENSMUSP00000035271	ENSMUSG00000033491	1037.75	1141.22	934.277	-0.288369	0.0121159	0.17126
ENSMUSG00000054387	chr1	132959484	133030561	-	Mdm4	protein_coding	O35618 Q9CYG1,Q3UTC9	MDM4_MOUSE,Q3UTC9_MOUSE	Protein Mdm4,Protein Mdm4 Transformed mouse 3T3 cell double minute 4, isoform CRA_b	Mdm4 Mdmx,Mdm4 mCG_12581	ENSMUST00000067429,ENSMUST00000067398	ENSMUSP00000070411,ENSMUSP00000068661	ENSMUSG00000054387,ENSMUSG00000054387	10002.6	10597.7	9407.58	-0.171834	0.0123478	0.174311
ENSMUSG00000031021	chr7	109735834	109752875	-	Tmem9b	protein_coding	D3YU78,D3Z6W5,Q9JJR8	D3YU78_MOUSE,D3Z6W5_MOUSE,TMM9B_MOUSE	Transmembrane protein 9B,TMEM9 domain family, member B, isoform CRA_a Transmembrane protein 9B,Transmembrane protein 9B	Tmem9b,Tmem9b mCG_6711,Tmem9b	ENSMUST00000128043,ENSMUST00000118571,ENSMUST00000033333	ENSMUSP00000121220,ENSMUSP00000113175,ENSMUSP00000033333	ENSMUSG00000031021,ENSMUSG00000031021,ENSMUSG00000031021	1309.34	1187.14	1431.54	0.269873	0.0123852	0.174613
ENSMUSG00000055850	chr6	72359714	72362721	-	Rnf181	protein_coding	D3YUJ1,F6SLH0,Q9CY62 Q8CEU6 Q9D2T4,S4R1H9,S4R1P6,S4R1T4,S4R201,S4R2J5	D3YUJ1_MOUSE,F6SLH0_MOUSE,RN181_MOUSE,S4R1H9_MOUSE,S4R1P6_MOUSE,S4R1T4_MOUSE,S4R201_MOUSE,S4R2J5_MOUSE	E3 ubiquitin-protein ligase RNF181,E3 ubiquitin-protein ligase RNF181,E3 ubiquitin-protein ligase RNF181,E3 ubiquitin-protein ligase RNF181,E3 ubiquitin-protein ligase RNF181,E3 ubiquitin-protein ligase RNF181,E3 ubiquitin-protein ligase RNF181,E3 ubiquitin-protein ligase RNF181	Rnf181,Rnf181,Rnf181,Rnf181,Rnf181,Rnf181,Rnf181,Rnf181	ENSMUST00000114095,ENSMUST00000130064,ENSMUST00000069580 ENSMUST00000069595 ENSMUST00000154098,ENSMUST00000125554,ENSMUST00000126065,ENSMUST00000129233,ENSMUST00000149296,ENSMUST00000151063	ENSMUSP00000109729,ENSMUSP00000115187,ENSMUSP00000066128,ENSMUSP00000138229,ENSMUSP00000138309,ENSMUSP00000138365,ENSMUSP00000138442,ENSMUSP00000138670	ENSMUSG00000055850,ENSMUSG00000055850,ENSMUSG00000055850,ENSMUSG00000055850,ENSMUSG00000055850,ENSMUSG00000055850,ENSMUSG00000055850,ENSMUSG00000055850	2452.78	2294.11	2611.45	0.186837	0.0124385	0.175137
ENSMUSG00000020496	chr11	58932288	58938916	-	Rnf187	protein_coding	Q8BFX1 Q4VA64 Q8C2B0 Q8CAS0 Q9JMF6	RN187_MOUSE	E3 ubiquitin-protein ligase RNF187	Rnf187	ENSMUST00000094151	ENSMUSP00000091703	ENSMUSG00000020496	2648.48	2479.81	2817.15	0.183936	0.0125629	0.175526
ENSMUSG00000025626	chrX	52912266	52956943	+	Phf6	protein_coding	E9QAG2,Q9D4J7 Q80T86 Q8BYT8 Q8C1B5	E9QAG2_MOUSE,PHF6_MOUSE	PHD finger protein 6,PHD finger protein 6	Phf6,Phf6 Kiaa1823	ENSMUST00000101587,ENSMUST00000078944 ENSMUST00000154864	ENSMUSP00000110497,ENSMUSP00000077971	ENSMUSG00000025626,ENSMUSG00000025626	1837.36	1966.88	1707.84	-0.203631	0.0124948	0.175526
ENSMUSG00000028068	chr3	88081971	88121048	+	Iqgap3	protein_coding	F8VQ29	F8VQ29_MOUSE	Protein Iqgap3	Iqgap3	ENSMUST00000071812	ENSMUSP00000071715	ENSMUSG00000028068	1549.99	1678.98	1421	-0.240523	0.0125188	0.175526
ENSMUSG00000040147	chrX	16709282	16817366	-	Maob	protein_coding	E9PVL9,E9Q3X6,G3UZM5,Q8BW75 Q14CG9 Q8C0B2	E9PVL9_MOUSE,E9Q3X6_MOUSE,G3UZM5_MOUSE,AOFB_MOUSE	Amine oxidase [flavin-containing] B,Amine oxidase [flavin-containing] B,Amine oxidase [flavin-containing] B,Amine oxidase [flavin-containing] B	Maob,Maob,Maob,Maob	ENSMUST00000163344,ENSMUST00000168613,ENSMUST00000173143,ENSMUST00000040820	ENSMUSP00000131743,ENSMUSP00000127235,ENSMUSP00000134555,ENSMUSP00000040550	ENSMUSG00000040147,ENSMUSG00000040147,ENSMUSG00000040147,ENSMUSG00000040147	1704.62	1581.78	1827.46	0.208168	0.012556	0.175526
ENSMUSG00000048763	chr11	96323326	96347930	+	Hoxb3	protein_coding	G3UZC2,P09026 P10285 Q4PJ06 Q61680	G3UZC2_MOUSE,HXB3_MOUSE	Homeobox protein Hox-B3,Homeobox protein Hox-B3	Hoxb3,Hoxb3 Hox-2,7 Hoxb-3	ENSMUST00000123091,ENSMUST00000055334 ENSMUST00000093944	ENSMUSP00000134435,ENSMUSP00000053426	ENSMUSG00000048763,ENSMUSG00000048763	379.232	430.574	327.889	-0.392007	0.0125542	0.175526
ENSMUSG00000074480	chr3	88532395	88541396	+	Mex3a	protein_coding	G3UYU0	G3UYU0_MOUSE	Protein Mex3a	Mex3a	ENSMUST00000172699	ENSMUSP00000134222	ENSMUSG00000074480	2869.19	3098.1	2640.27	-0.230619	0.0125159	0.175526
ENSMUSG00000021390	chr13	49608071	49624500	+	Ogn	protein_coding	Q62000	MIME_MOUSE	Mimecan	Ogn Og	ENSMUST00000021822	ENSMUSP00000021822	ENSMUSG00000021390	9098.61	9556.47	8640.76	-0.145303	0.0126186	0.175853
ENSMUSG00000027215	chr2	93419111	93463140	-	Cd82	protein_coding	A2AIJ1,A2AIJ2,A2AIJ3,A2AIJ4,P40237	A2AIJ1_MOUSE,A2AIJ2_MOUSE,A2AIJ3_MOUSE,A2AIJ4_MOUSE,CD82_MOUSE	CD82 antigen,CD82 antigen,CD82 antigen,CD82 antigen,CD82 antigen	Cd82,Cd82,Cd82,Cd82,Cd82 Kai1	ENSMUST00000123565,ENSMUST00000145553 ENSMUST00000150508,ENSMUST00000111256,ENSMUST00000124804,ENSMUST00000028644 ENSMUST00000099696 ENSMUST00000111257 ENSMUST00000116457	ENSMUSP00000114762,ENSMUSP00000115310,ENSMUSP00000106887,ENSMUSP00000115349,ENSMUSP00000028644	ENSMUSG00000027215,ENSMUSG00000027215,ENSMUSG00000027215,ENSMUSG00000027215,ENSMUSG00000027215	1531.8	1416.08	1647.53	0.218262	0.0126074	0.175853
ENSMUSG00000034382	chr17	47436615	47470638	+	AI661453	protein_coding	Q91Z58 Q8K108	CF132_MOUSE	Uncharacterized protein C6orf132 homolog		ENSMUST00000037701 ENSMUST00000150819	ENSMUSP00000045345	ENSMUSG00000034382	655.857	589.657	722.057	0.291789	0.0126548	0.176034
ENSMUSG00000051331	chr6	118587240	119196418	-	Cacna1c	protein_coding	F7C376,F8WGN0,F8WIW9,F8WJL1,Q01815 Q04476 Q61242 Q99242	F7C376_MOUSE,F8WGN0_MOUSE,F8WIW9_MOUSE,F8WJL1_MOUSE,CAC1C_MOUSE	Voltage-dependent L-type calcium channel subunit alpha-1C,Voltage-dependent L-type calcium channel subunit alpha-1C,Voltage-dependent L-type calcium channel subunit alpha-1C,Voltage-dependent L-type calcium channel subunit alpha-1C,Voltage-dependent L-type calcium channel subunit alpha-1C	Cacna1c,Cacna1c,Cacna1c,Cacna1c,Cacna1c Cach2 Cacn2 Cacnl1a1 Cchl1a1	ENSMUST00000112793,ENSMUST00000075591,ENSMUST00000078320,ENSMUST00000112790,ENSMUST00000112825	ENSMUSP00000108413,ENSMUSP00000075021,ENSMUSP00000077433,ENSMUSP00000108410,ENSMUSP00000108444	ENSMUSG00000051331,ENSMUSG00000051331,ENSMUSG00000051331,ENSMUSG00000051331,ENSMUSG00000051331	3101.65	3292.26	2911.04	-0.177486	0.012664	0.176034
ENSMUSG00000031340	chrX	72255999	72274803	-	Gabre	protein_coding	A2AMW3	A2AMW3_MOUSE	Protein Gabre	Gabre	ENSMUST00000064780	ENSMUSP00000066543	ENSMUSG00000031340	519.481	578.316	460.645	-0.327568	0.0127033	0.176356
ENSMUSG00000050390	chr4	129219578	129261404	-	C77080	protein_coding	A2A7S8 A2A7S9 Q3U356 Q3U437 Q3V3N0 Q6ZPN9 Q8K0K8,D3Z0K5,D3Z770	K1522_MOUSE,D3Z0K5_MOUSE,D3Z770_MOUSE	Uncharacterized protein KIAA1522,Protein C77080,Protein C77080	Kiaa1522,C77080,C77080	ENSMUST00000052602 ENSMUST00000097873 ENSMUST00000106051,ENSMUST00000145261,ENSMUST00000146376	ENSMUSP00000062395,ENSMUSP00000123245,ENSMUSP00000122247	ENSMUSG00000050390,ENSMUSG00000050390,ENSMUSG00000050390	1089.64	999.272	1180	0.239616	0.0127511	0.176793
ENSMUSG00000021036	chr12	87305058	87388355	-	Sptlc2	protein_coding	P97363 P97356	SPTC2_MOUSE	Serine palmitoyltransferase 2	Sptlc2 Lcb2	ENSMUST00000021424	ENSMUSP00000021424	ENSMUSG00000021036	3651.82	3421.32	3882.33	0.182317	0.0128728	0.178027
ENSMUSG00000031617	chr8	77595982	77610698	-	Tmem184c	protein_coding	D3YVG4,D3YWM0,Q3TPR7 Q8CCD2 Q99KQ7	D3YVG4_MOUSE,D3YWM0_MOUSE,T184C_MOUSE	Transmembrane protein 184C,Transmembrane protein 184C,Transmembrane protein 184C	Tmem184c,Tmem184c,Tmem184c Tmem34	ENSMUST00000152168,ENSMUST00000141202,ENSMUST00000034030	ENSMUSP00000114463,ENSMUSP00000120041,ENSMUSP00000034030	ENSMUSG00000031617,ENSMUSG00000031617,ENSMUSG00000031617	862.778	942.497	783.059	-0.267055	0.0128641	0.178027
ENSMUSG00000030929	chr7	119768679	119794058	-	Eri2	protein_coding	D3YW28,D6RE53,F8WH13,Q5BKS4 Q3TUK9 Q8C133,Q9D405	D3YW28_MOUSE,D6RE53_MOUSE,F8WH13_MOUSE,ERI2_MOUSE,Q9D405_MOUSE	ERI1 exoribonuclease 2,ERI1 exoribonuclease 2,ERI1 exoribonuclease 2,ERI1 exoribonuclease 2,ERI1 exoribonuclease 2	Eri2,Eri2,Eri2,Eri2 Exod1 Kiaa1504,Eri2 Exod1	ENSMUST00000106523,ENSMUST00000139192,ENSMUST00000033224,ENSMUST00000150844,ENSMUST00000063902	ENSMUSP00000102133,ENSMUSP00000117940,ENSMUSP00000033224,ENSMUSP00000120547,ENSMUSP00000068633	ENSMUSG00000030929,ENSMUSG00000030929,ENSMUSG00000030929,ENSMUSG00000030929,ENSMUSG00000030929	799.046	873.946	724.146	-0.270923	0.012914	0.17837
ENSMUSG00000034317	chr3	69035288	69044755	-	Trim59	protein_coding	D3Z0I5,D3Z1L3,Q922Y2 E9QKA7 Q9CSP2 Q9CUD5 Q9D740	D3Z0I5_MOUSE,D3Z1L3_MOUSE,TRI59_MOUSE	Tripartite motif-containing protein 59,Tripartite motif-containing protein 59,Tripartite motif-containing protein 59	Trim59,Trim59,Trim59 Mrf1	ENSMUST00000136512,ENSMUST00000143454,ENSMUST00000107802	ENSMUSP00000120270,ENSMUSP00000119748,ENSMUSP00000103432	ENSMUSG00000034317,ENSMUSG00000034317,ENSMUSG00000034317	2173.43	2324.59	2022.27	-0.200905	0.0129671	0.178425
ENSMUSG00000034621	chr11	102475915	102556392	-	Gpatch8	protein_coding	A2A6A1 Q80TY1	GPTC8_MOUSE	G patch domain-containing protein 8	Gpatch8 Gpatc8 Kiaa0553	ENSMUST00000143842	ENSMUSP00000120649	ENSMUSG00000034621	2781.94	2956.89	2606.99	-0.181628	0.0129483	0.178425
ENSMUSG00000038379	chr9	83834689	83872389	+	Ttk	protein_coding	P35761	TTK_MOUSE	Dual specificity protein kinase TTK	Ttk Esk	ENSMUST00000070326	ENSMUSP00000064839	ENSMUSG00000038379	1035.5	1132.43	938.566	-0.270634	0.0129591	0.178425
ENSMUSG00000005103	chr5	38526813	38563221	-	Wdr1	protein_coding	O88342	WDR1_MOUSE	WD repeat-containing protein 1	Wdr1	ENSMUST00000005234	ENSMUSP00000005234	ENSMUSG00000005103	5208.54	4908.07	5509.01	0.166604	0.0130212	0.178528
ENSMUSG00000025790	chr7	74275419	74554780	-	Slco3a1	protein_coding	D3YUC4,D3YXA8,F7B851,Q8R3L5 Q3TLX2 Q3U7W0 Q505P2 Q544H3 Q9CTV3 Q9JKV0	D3YUC4_MOUSE,D3YXA8_MOUSE,F7B851_MOUSE,SO3A1_MOUSE	Solute carrier organic anion transporter family member 3A1,Solute carrier organic anion transporter family member 3A1,Solute carrier organic anion transporter family member 3A1,Solute carrier organic anion transporter family member 3A1	Slco3a1,Slco3a1,Slco3a1,Slco3a1 Oatp3a1 Oatpd Slc21a11	ENSMUST00000138099,ENSMUST00000107453,ENSMUST00000134539,ENSMUST00000026897 ENSMUST00000098371	ENSMUSP00000115279,ENSMUSP00000103077,ENSMUSP00000116946,ENSMUSP00000026897	ENSMUSG00000025790,ENSMUSG00000025790,ENSMUSG00000025790,ENSMUSG00000025790	1036.62	944.967	1128.27	0.255527	0.0130214	0.178528
ENSMUSG00000069516	chr10	117277334	117282274	-	Lyz2	protein_coding	P08905 Q3TXG2 Q3U5Q2 Q3U690 Q8VE78	LYZ2_MOUSE	Lysozyme C-2	Lyz2 Lyz Lyzs	ENSMUST00000092163	ENSMUSP00000089801	ENSMUSG00000069516	3895.67	3307.82	4483.52	0.438639	0.0130238	0.178528
ENSMUSG00000035852	chr10	79821021	79830452	+	Misp	protein_coding	Q9D279 Q3UI04	MISP_MOUSE	Mitotic interactor and substrate of PLK1	Misp	ENSMUST00000046833 ENSMUST00000169041	ENSMUSP00000048893	ENSMUSG00000035852	296.269	254.525	338.013	0.407876	0.0130563	0.178748
ENSMUSG00000022262	chr15	28203752	28472045	+	Dnah5	protein_coding	Q8VHE6 E9QKD7 Q8BWG1	DYH5_MOUSE	Dynein heavy chain 5, axonemal	Dnah5 Dnahc5	ENSMUST00000067048	ENSMUSP00000069751	ENSMUSG00000022262	437.236	384.457	490.015	0.349198	0.0132404	0.181041
ENSMUSG00000026825	chr2	32308471	32353338	-	Dnm1	protein_coding	D6RH60,F6RRH9,F6TH70,F6W8Z8,P39053 A2AN50 A2AN51 A2AN54 A2AN55 Q3UNM1 Q5DTN7 Q61358 Q61359 Q61360 Q6PDM5 Q8JZZ4 Q9CSY7 Q9QXX1	D6RH60_MOUSE,F6RRH9_MOUSE,F6TH70_MOUSE,F6W8Z8_MOUSE,DYN1_MOUSE	Dynamin-1,Dynamin-1,Dynamin-1,Dynamin-1,Dynamin-1	Dnm1,Dnm1,Dnm1,Dnm1,Dnm1 Dnm Kiaa4093	ENSMUST00000139238,ENSMUST00000155269,ENSMUST00000139291,ENSMUST00000129156,ENSMUST00000078352 ENSMUST00000091089 ENSMUST00000113350 ENSMUST00000113352 ENSMUST00000113365 ENSMUST00000139624	ENSMUSP00000118855,ENSMUSP00000116054,ENSMUSP00000115523,ENSMUSP00000118914,ENSMUSP00000077461	ENSMUSG00000026825,ENSMUSG00000026825,ENSMUSG00000026825,ENSMUSG00000026825,ENSMUSG00000026825	917.606	998.47	836.741	-0.25466	0.0133709	0.182531
ENSMUSG00000058546	chr11	78180932	78183584	-	Rpl23a	protein_coding								887.567	966.988	808.145	-0.258591	0.0133829	0.182531
ENSMUSG00000025862	chrX	42149317	42277185	+	Stag2	protein_coding	A2AFF3,A2AFF6,B7ZCD2,F6XLF4,O35638 A2AFF5 Q6NZN7	A2AFF3_MOUSE,A2AFF6_MOUSE,B7ZCD2_MOUSE,F6XLF4_MOUSE,STAG2_MOUSE	Cohesin subunit SA-2,Cohesin subunit SA-2,Cohesin subunit SA-2,Cohesin subunit SA-2,Cohesin subunit SA-2	Stag2,Stag2,Stag2,Stag2,Stag2 Sa2 Sap2	ENSMUST00000127618,ENSMUST00000115073,ENSMUST00000123245,ENSMUST00000128799,ENSMUST00000069619 ENSMUST00000115072	ENSMUSP00000119635,ENSMUSP00000110725,ENSMUSP00000118567,ENSMUSP00000120592,ENSMUSP00000063250	ENSMUSG00000025862,ENSMUSG00000025862,ENSMUSG00000025862,ENSMUSG00000025862,ENSMUSG00000025862	10979	11520.6	10437.3	-0.142458	0.0134041	0.18259
ENSMUSG00000006205	chr7	130936111	130985660	+	Htra1	protein_coding	Q9R118 Q8BN04 Q8BN05 Q91WS3 Q9QZK6	HTRA1_MOUSE	Serine protease HTRA1	Htra1 Htra Prss11	ENSMUST00000006367	ENSMUSP00000006367	ENSMUSG00000006205	1227.04	1125.32	1328.77	0.239555	0.0134479	0.182809
ENSMUSG00000041740	chr5	115241412	115272898	-	Rnf10	protein_coding	D3Z1N2,F7AN16,H7BX06,Q3UIW5 Q6PDS8 Q6ZQE8 Q91YZ9 Q9R0P0	D3Z1N2_MOUSE,F7AN16_MOUSE,H7BX06_MOUSE,RNF10_MOUSE	RING finger protein 10,RING finger protein 10,RING finger protein 10,RING finger protein 10	Rnf10,Rnf10,Rnf10,Rnf10 Kiaa0262 Rie2 Sid2705	ENSMUST00000112097,ENSMUST00000139853,ENSMUST00000040555,ENSMUST00000112096	ENSMUSP00000107726,ENSMUSP00000131696,ENSMUSP00000041778,ENSMUSP00000107725	ENSMUSG00000041740,ENSMUSG00000041740,ENSMUSG00000041740,ENSMUSG00000041740	5742.61	5428.61	6056.62	0.157902	0.0134537	0.182809
ENSMUSG00000021285	chr12	111828458	111908055	-	Ppp1r13b	protein_coding	Q3UW51 E9Q889,Q62415	Q3UW51_MOUSE,ASPP1_MOUSE	Apoptosis-stimulating of p53 protein 1,Apoptosis-stimulating of p53 protein 1	Ppp1r13b,Ppp1r13b Aspp1	ENSMUST00000163747,ENSMUST00000054815	ENSMUSP00000130017,ENSMUSP00000062464	ENSMUSG00000021285,ENSMUSG00000021285	2354.32	2202.91	2505.73	0.185742	0.0134935	0.182894
ENSMUSG00000030352	chr6	127961396	128143594	-	Tspan9	protein_coding	D3YU98,D3YV18,D3YXN7,D3Z6M6,Q8BJU2 Q3TQQ0	D3YU98_MOUSE,D3YV18_MOUSE,D3YXN7_MOUSE,D3Z6M6_MOUSE,TSN9_MOUSE	Tetraspanin-9,Tetraspanin-9,Tetraspanin-9,Tetraspanin-9,Tetraspanin-9	Tspan9,Tspan9,Tspan9,Tspan9,Tspan9 Net5	ENSMUST00000127105,ENSMUST00000154375,ENSMUST00000123786,ENSMUST00000146268,ENSMUST00000032503 ENSMUST00000112171 ENSMUST00000112173	ENSMUSP00000115324,ENSMUSP00000114763,ENSMUSP00000115922,ENSMUSP00000116142,ENSMUSP00000032503	ENSMUSG00000030352,ENSMUSG00000030352,ENSMUSG00000030352,ENSMUSG00000030352,ENSMUSG00000030352	4797.89	4525.15	5070.64	0.16417	0.0134924	0.182894
ENSMUSG00000035458	chr7	4518305	4524229	-	Tnni3	protein_coding	D3YXP5,D3Z160,P48787	D3YXP5_MOUSE,D3Z160_MOUSE,TNNI3_MOUSE	Troponin I, cardiac muscle,Troponin I, cardiac muscle,Troponin I, cardiac muscle	Tnni3,Tnni3,Tnni3	ENSMUST00000140424,ENSMUST00000154913,ENSMUST00000098859	ENSMUSP00000115015,ENSMUSP00000122916,ENSMUSP00000096458	ENSMUSG00000035458,ENSMUSG00000035458,ENSMUSG00000035458	352.955	303.385	402.525	0.40676	0.0136267	0.184469
ENSMUSG00000026701	chr1	161240112	161251219	-	Prdx6	protein_coding	D3Z0Y2,Q6GT24	D3Z0Y2_MOUSE,Q6GT24_MOUSE	Peroxiredoxin-6,Peroxiredoxin 6 Peroxiredoxin-6	Prdx6,Prdx6	ENSMUST00000051925,ENSMUST00000071718	ENSMUSP00000050703,ENSMUSP00000071636	ENSMUSG00000026701,ENSMUSG00000026701	4742.69	4475.99	5009.4	0.162397	0.0137018	0.184581
ENSMUSG00000026896	chr2	62595798	62646255	-	Ifih1	protein_coding	Q8R5F7 A2AUY7 Q3U6S2 Q68EM4 Q8BYC9 Q8BZ01 Q8K5C7 Q8R144 Q8VE79 Q99KS4 Q9D2Z5	IFIH1_MOUSE	Interferon-induced helicase C domain-containing protein 1	Ifih1	ENSMUST00000028259 ENSMUST00000112459	ENSMUSP00000028259	ENSMUSG00000026896	362.276	314.198	410.354	0.38412	0.0137028	0.184581
ENSMUSG00000059939	chr4	156109982	156127265	+	9430015G10Rik	protein_coding	A2ASP7,Q8BSD8	A2ASP7_MOUSE,Q8BSD8_MOUSE	Protein 9430015G10Rik,Protein 9430015G10Rik	9430015G10Rik,9430015G10Rik	ENSMUST00000072554 ENSMUST00000169550,ENSMUST00000105576	ENSMUSP00000072366,ENSMUSP00000101201	ENSMUSG00000059939,ENSMUSG00000059939	1419.54	1531.13	1307.96	-0.227118	0.0136715	0.184581
ENSMUSG00000098496	chr7	73539801	73558395	-	1810026B05Rik	processed_transcript								382.649	437.658	327.641	-0.416581	0.0137	0.184581
ENSMUSG00000006342	chr10	75636619	75644008	-	Susd2	protein_coding	Q9DBX3 Q8BY19 Q8BYN0 Q8BYZ3 Q8BYZ9 Q8BZQ4 Q8C179	SUSD2_MOUSE	Sushi domain-containing protein 2	Susd2	ENSMUST00000077610 ENSMUST00000095541	ENSMUSP00000076802	ENSMUSG00000006342	768.213	695.429	840.997	0.273838	0.013736	0.184799
ENSMUSG00000026509	chr1	182467260	182517608	-	Capn2	protein_coding	O08529 O35518 O54843	CAN2_MOUSE	Calpain-2 catalytic subunit	Capn2	ENSMUST00000068505	ENSMUSP00000068895	ENSMUSG00000026509	4538.51	4276.85	4800.17	0.166498	0.0137995	0.185425
ENSMUSG00000031949	chr8	111966908	111992302	-	Adat1	protein_coding	D3Z6J6,Q9JHI2 Q3TU04 Q8CBP0 Q8VE23	D3Z6J6_MOUSE,ADAT1_MOUSE	tRNA-specific adenosine deaminase 1,tRNA-specific adenosine deaminase 1	Adat1,Adat1	ENSMUST00000120457,ENSMUST00000034427 ENSMUST00000139820	ENSMUSP00000113201,ENSMUSP00000034427	ENSMUSG00000031949,ENSMUSG00000031949	363.575	411.841	315.309	-0.384254	0.0138499	0.185643
ENSMUSG00000039748	chr1	175880581	175913489	+	Exo1	protein_coding	Q9QZ11 Q3TLM4 Q923A5	EXO1_MOUSE	Exonuclease 1	Exo1	ENSMUST00000039725	ENSMUSP00000039376	ENSMUSG00000039748	546.063	608.453	483.674	-0.330498	0.0138453	0.185643
ENSMUSG00000021614	chr13	89655312	89742509	-	Vcan	protein_coding	E0CZC0,E9PYH0,E9QMK2,E9QMK3,F7B603,F7B6F7,G3XA35,Q8BS97	E0CZC0_MOUSE,E9PYH0_MOUSE,E9QMK2_MOUSE,E9QMK3_MOUSE,F7B603_MOUSE,F7B6F7_MOUSE,G3XA35_MOUSE,Q8BS97_MOUSE	Versican core protein,Versican core protein,Versican core protein,Versican core protein,Versican core protein,Versican core protein,MCG116562, isoform CRA_a Versican core protein,Versican core protein	Vcan,Vcan,Vcan,Vcan,Vcan,Vcan,Vcan mCG_116562,Vcan Cspg2	ENSMUST00000162715,ENSMUST00000109546,ENSMUST00000109544,ENSMUST00000109543,ENSMUST00000160740,ENSMUST00000159285,ENSMUST00000159910,ENSMUST00000159337	ENSMUSP00000125521,ENSMUSP00000105173,ENSMUSP00000105171,ENSMUSP00000105170,ENSMUSP00000125694,ENSMUSP00000125674,ENSMUSP00000125446,ENSMUSP00000125432	ENSMUSG00000021614,ENSMUSG00000021614,ENSMUSG00000021614,ENSMUSG00000021614,ENSMUSG00000021614,ENSMUSG00000021614,ENSMUSG00000021614,ENSMUSG00000021614	7677.46	8137.62	7217.3	-0.173126	0.0138804	0.185823
ENSMUSG00000007989	chr14	65201026	65262463	-	Fzd3	protein_coding	Q61086	FZD3_MOUSE	Frizzled-3	Fzd3	ENSMUST00000131309	ENSMUSP00000115325	ENSMUSG00000007989	293.064	335.624	250.505	-0.420556	0.0139324	0.186168
ENSMUSG00000024997	chr19	60864051	60874556	-	Prdx3	protein_coding	P20108	PRDX3_MOUSE	Thioredoxin-dependent peroxide reductase, mitochondrial	Prdx3 Aop1 Mer5	ENSMUST00000025961	ENSMUSP00000025961	ENSMUSG00000024997	1772.98	1645.43	1900.53	0.207824	0.0139531	0.186168
ENSMUSG00000028060	chr3	88685803	88712924	+	2810403A07Rik	protein_coding	Q3TCX3 Q69ZW1 Q8BUQ0 Q923C9 Q9CZ63 Q9D207	K0907_MOUSE	UPF0469 protein KIAA0907	Kiaa0907	ENSMUST00000029696	ENSMUSP00000029696	ENSMUSG00000028060	4880.29	5154.01	4606.57	-0.161969	0.0139917	0.186168
ENSMUSG00000046591	chr7	79660196	79698134	+	Ticrr	protein_coding	Q8BQ33 B2RY55 Q8C9N4 Q8CCI2	TICRR_MOUSE	Treslin	Ticrr	ENSMUST00000035977	ENSMUSP00000041377	ENSMUSG00000046591	669.766	742.827	596.704	-0.315536	0.0139826	0.186168
ENSMUSG00000072501	chr15	66577572	66645255	+	Phf20l1	protein_coding	Q8CCJ9 A6H5Y9 Q80UN6 Q8BPP8 Q8BQQ6 Q8BS11 Q8C8H9	P20L1_MOUSE	PHD finger protein 20-like protein 1	Phf20l1	ENSMUST00000048188	ENSMUSP00000035682	ENSMUSG00000072501	4833.49	5108.79	4558.19	-0.164487	0.013967	0.186168
ENSMUSG00000015093	chr2	25456838	25458776	+	Clic3	protein_coding	A2AJ28,Q9D7P7	A2AJ28_MOUSE,CLIC3_MOUSE	Chloride intracellular channel protein 3,Chloride intracellular channel protein 3	Clic3,Clic3	ENSMUST00000102918,ENSMUST00000114265	ENSMUSP00000099982,ENSMUSP00000109904	ENSMUSG00000015093,ENSMUSG00000015093	2174.73	1837.55	2511.91	0.450791	0.014033	0.18649
ENSMUSG00000018379	chr11	88047373	88053755	+	Srsf1	protein_coding	F6QXN3,F7AI47,H7BX95,Q6PDM2 B2KGJ5 Q3UCH2 Q5SXC5 Q8BJV3 Q8C1H9	F6QXN3_MOUSE,F7AI47_MOUSE,H7BX95_MOUSE,SRSF1_MOUSE	Serine/arginine-rich-splicing factor 1,Serine/arginine-rich-splicing factor 1,Serine/arginine-rich-splicing factor 1,Serine/arginine-rich splicing factor 1	Srsf1,Srsf1,Srsf1,Srsf1 Sfrs1	ENSMUST00000172186,ENSMUST00000134824,ENSMUST00000107920,ENSMUST00000079866 ENSMUST00000139129	ENSMUSP00000128190,ENSMUSP00000114549,ENSMUSP00000103553,ENSMUSP00000133517	ENSMUSG00000018379,ENSMUSG00000018379,ENSMUSG00000018379,ENSMUSG00000018379	17207.9	18012.3	16403.5	-0.134971	0.0142623	0.187567
ENSMUSG00000027115	chr2	109280738	109341747	+	Kif18a	protein_coding	Q91WD7 Q3TP77 Q8BLL1	KI18A_MOUSE	Kinesin-like protein KIF18A	Kif18a	ENSMUST00000028527	ENSMUSP00000028527	ENSMUSG00000027115	888.609	972.573	804.645	-0.273144	0.0142661	0.187567
ENSMUSG00000031983	chr8	124635766	124663369	-	2310022B05Rik	protein_coding	Q8C3W1 Q3TCS2 Q3U2K7 Q3U3E1 Q6PDM3	CA198_MOUSE	Uncharacterized protein C1orf198 homolog		ENSMUST00000034464	ENSMUSP00000034464	ENSMUSG00000031983	3148.82	2961.67	3335.96	0.171632	0.0142329	0.187567
ENSMUSG00000033705	chr2	120629126	120731895	+	Stard9	protein_coding	A2AKH9,A2AKI0,A2AKI2,E9QAC0,F7B335,Q80TF6 O35058 Q8C121 Q8CFL0	A2AKH9_MOUSE,A2AKI0_MOUSE,A2AKI2_MOUSE,E9QAC0_MOUSE,F7B335_MOUSE,STAR9_MOUSE	StAR-related lipid transfer protein 9,StAR-related lipid transfer protein 9,StAR-related lipid transfer protein 9,StAR-related lipid transfer protein 9,StAR-related lipid transfer protein 9,StAR-related lipid transfer protein 9	Stard9,Stard9,Stard9,Stard9,Stard9,Stard9 Kiaa1300 Kif16a	ENSMUST00000140843,ENSMUST00000070420,ENSMUST00000150912,ENSMUST00000099504,ENSMUST00000154193,ENSMUST00000180041	ENSMUSP00000117178,ENSMUSP00000070111,ENSMUSP00000121874,ENSMUSP00000097104,ENSMUSP00000116900,ENSMUSP00000136055	ENSMUSG00000033705,ENSMUSG00000033705,ENSMUSG00000033705,ENSMUSG00000033705,ENSMUSG00000033705,ENSMUSG00000033705	7660.02	8148.97	7171.07	-0.184404	0.0141824	0.187567
ENSMUSG00000039236	chr7	78913424	78920362	+	Isg20	protein_coding	Q9JL16 Q9CPZ5	ISG20_MOUSE	Interferon-stimulated gene 20 kDa protein	Isg20	ENSMUST00000038142 ENSMUST00000118867 ENSMUST00000120331 ENSMUST00000121645	ENSMUSP00000040080	ENSMUSG00000039236	306.704	263.598	349.81	0.406889	0.0142637	0.187567
ENSMUSG00000056313	chr8	24437180	24438984	-	1810011O10Rik	protein_coding	Q9D915	CH004_MOUSE	Uncharacterized protein C8orf4 homolog		ENSMUST00000052622	ENSMUSP00000058631	ENSMUSG00000056313	2070.69	1924.49	2216.89	0.203968	0.0141594	0.187567
ENSMUSG00000057969	chr9	107597674	107609229	-	Sema3b	protein_coding	M0QWQ7,M9MMK0	M0QWQ7_MOUSE,M9MMK0_MOUSE	Semaphorin-3B,Semaphorin-3B	Sema3b,Sema3b	ENSMUST00000123926,ENSMUST00000073448 ENSMUST00000102529 ENSMUST00000102530 ENSMUST00000102531 ENSMUST00000102532	ENSMUSP00000137952,ENSMUSP00000073152	ENSMUSG00000057969,ENSMUSG00000057969	539.733	479.922	599.544	0.320467	0.0141566	0.187567
ENSMUSG00000063268	chr15	76231174	76243441	-	Parp10	protein_coding	F6Z9X8,Q8CIE4	F6Z9X8_MOUSE,Q8CIE4_MOUSE	Protein Parp10,Plec1 protein Protein Parp10	Parp10,Parp10 Plec1	ENSMUST00000170226,ENSMUST00000075689 ENSMUST00000165738	ENSMUSP00000131370,ENSMUSP00000075110	ENSMUSG00000063268,ENSMUSG00000063268	409.226	356.028	462.423	0.376291	0.0142691	0.187567
ENSMUSG00000097772	chr5	100420842	100429535	-	5430416N02Rik	lincRNA								342.382	387.45	297.314	-0.380894	0.0142412	0.187567
ENSMUSG00000101970	chr7	73544036	73558386	-	1810026B05Rik	processed_transcript								685.408	752.957	617.859	-0.284871	0.0143183	0.187986
ENSMUSG00000024952	chr19	6829085	6840601	-	Rps6ka4	protein_coding	Q9Z2B9 Q3U3M8 Q91X18	KS6A4_MOUSE	Ribosomal protein S6 kinase alpha-4	Rps6ka4 Msk2	ENSMUST00000025903 ENSMUST00000170516	ENSMUSP00000025903	ENSMUSG00000024952	1589.85	1468.03	1711.67	0.221387	0.0144502	0.189489
ENSMUSG00000103114	chr1	191436340	191465048	-	Gm32200	lincRNA								447.705	385.66	509.75	0.40155	0.0144838	0.189701
ENSMUSG00000022594	chr15	74747852	74753046	-	Lynx1	protein_coding	Q9WVC2 Q08EF7 Q3TRB5	LYNX1_MOUSE	Ly-6/neurotoxin-like protein 1	Lynx1 Slurp2	ENSMUST00000023259 ENSMUST00000057932	ENSMUSP00000023259	ENSMUSG00000022594	271.459	231.539	311.378	0.425819	0.014518	0.18992
ENSMUSG00000021510	chr13	67617001	67637791	-	Zfp729a	protein_coding	Q4QQP3	Q4QQP3_MOUSE	Protein A530054K11Rik Uncharacterized protein	A530054K11Rik	ENSMUST00000012314	ENSMUSP00000012314	ENSMUSG00000021510	729.42	798.522	660.318	-0.273795	0.0145691	0.19036
ENSMUSG00000041560	chr7	15936183	15946074	-	Gltscr2	protein_coding	Q8BK35	Q8BK35_MOUSE	MCG2065, isoform CRA_c PreS1 binding protein Protein Gltscr2	Gltscr2 mCG_2065	ENSMUST00000044158	ENSMUSP00000043981	ENSMUSG00000041560	4245.84	3984.36	4507.32	0.17788	0.014659	0.191305
ENSMUSG00000025784	chr9	123150946	123157430	+	Clec3b	protein_coding	Q8CFZ6	Q8CFZ6_MOUSE	C-type lectin domain family 3, member b Tetranectin	Clec3b Tna	ENSMUST00000026890	ENSMUSP00000026890	ENSMUSG00000025784	399.42	292.384	506.456	0.790493	0.014716	0.191602
ENSMUSG00000030016	chr6	83914353	83986869	+	Zfp638	protein_coding	E9QKZ7,E9QML5,Q61464 Q6DFV9 Q8C941	E9QKZ7_MOUSE,E9QML5_MOUSE,ZN638_MOUSE	Zinc finger protein 638,Zinc finger protein 638,Zinc finger protein 638	Zfml,Zfml,Znf638 Np220 Zfml	ENSMUST00000113836,ENSMUST00000032088,ENSMUST00000113835	ENSMUSP00000109467,ENSMUSP00000032088,ENSMUSP00000109466	ENSMUSG00000030016,ENSMUSG00000030016,ENSMUSG00000030016	5614.39	5940.33	5288.46	-0.167664	0.014717	0.191602
ENSMUSG00000030528	chr7	80454993	80535119	-	Blm	protein_coding	E9PZ97,O88700 O88198	E9PZ97_MOUSE,BLM_MOUSE	Bloom syndrome protein homolog,Bloom syndrome protein homolog	Blm,Blm	ENSMUST00000170315,ENSMUST00000081314	ENSMUSP00000127995,ENSMUSP00000080062	ENSMUSG00000030528,ENSMUSG00000030528	964.15	1056.11	872.194	-0.275745	0.014735	0.191608
ENSMUSG00000020034	chr10	84576626	84614359	+	Tcp11l2	protein_coding	Q8K1H7 Q8C2D5	T11L2_MOUSE	T-complex protein 11-like protein 2	Tcp11l2	ENSMUST00000020223	ENSMUSP00000020223	ENSMUSG00000020034	1617.13	1501.88	1732.39	0.205862	0.0148627	0.192014
ENSMUSG00000022941	chr16	94328420	94336935	+	Ripply3	protein_coding	Q924S9 B8JK62 Q8BYB3	DSCR6_MOUSE	Protein ripply3	Ripply3 Dscr6	ENSMUST00000023660	ENSMUSP00000023660	ENSMUSG00000022941	562.329	502.227	622.431	0.309021	0.0148861	0.192014
ENSMUSG00000024097	chr17	80200089	80207305	-	Srsf7	protein_coding	Q8BL97 Q8BMC6 Q8BUR2 Q8R2N4 Q8R3E9 Q91YS1	SRSF7_MOUSE	Serine/arginine-rich splicing factor 7	Srsf7 Sfrs7	ENSMUST00000063417	ENSMUSP00000070983	ENSMUSG00000024097	6389.69	6731.47	6047.91	-0.154462	0.0148733	0.192014
ENSMUSG00000024712	chr19	17394043	17401349	+	Rfk	protein_coding	Q8CFV9 O35471 O35472 Q9CQ95	RIFK_MOUSE	Riboflavin kinase	Rfk	ENSMUST00000025617	ENSMUSP00000025617	ENSMUSG00000024712	1546.48	1432.45	1660.51	0.213009	0.0148897	0.192014
ENSMUSG00000031812	chr8	121590361	121598760	+	Map1lc3b	protein_coding	M0QWC2,M0QWT8,Q9CQV6 Q3U9W5 Q9D1R0	M0QWC2_MOUSE,M0QWT8_MOUSE,MLP3B_MOUSE	MCG14171, isoform CRA_b Microtubule-associated proteins 1A/1B light chain 3B,Microtubule-associated proteins 1A/1B light chain 3B,Microtubule-associated proteins 1A/1B light chain 3B	Map1lc3b mCG_14171,Map1lc3b,Map1lc3b Map1alc3 Map1lc3	ENSMUST00000181948,ENSMUST00000181521,ENSMUST00000034270	ENSMUSP00000137754,ENSMUSP00000137996,ENSMUSP00000034270	ENSMUSG00000031812,ENSMUSG00000031812,ENSMUSG00000031812	2735.54	2548.93	2922.15	0.197067	0.0148249	0.192014
ENSMUSG00000036036	chr17	37001163	37010635	+	Zfp57	protein_coding	G3UWX4,G3UX77,G3UY05,G3UYC1,G3UYK1,H3BL53,Q8C6P8 Q3UT94 Q62515 Q6JPI1	G3UWX4_MOUSE,G3UX77_MOUSE,G3UY05_MOUSE,G3UYC1_MOUSE,G3UYK1_MOUSE,H3BL53_MOUSE,ZFP57_MOUSE	Zinc finger protein 57,Zinc finger protein 57,Zinc finger protein 57,Zinc finger protein 57,Zinc finger protein 57,Zinc finger protein 57,Zinc finger protein 57	Zfp57,Zfp57,Zfp57,Zfp57,Zfp57,Zfp57,Zfp57	ENSMUST00000174747,ENSMUST00000173921,ENSMUST00000172580,ENSMUST00000172540,ENSMUST00000172527,ENSMUST00000173588,ENSMUST00000069250 ENSMUST00000089968 ENSMUST00000174524 ENSMUST00000174672	ENSMUSP00000133460,ENSMUSP00000133582,ENSMUSP00000133894,ENSMUSP00000134024,ENSMUSP00000134116,ENSMUSP00000135655,ENSMUSP00000065811	ENSMUSG00000036036,ENSMUSG00000036036,ENSMUSG00000036036,ENSMUSG00000036036,ENSMUSG00000036036,ENSMUSG00000036036,ENSMUSG00000036036	3123.58	3326.13	2921.02	-0.187314	0.0147862	0.192014
ENSMUSG00000038453	chr11	97509340	97575226	-	Srcin1	protein_coding	B1AQX6,B1AQX7,B1AQX8,B1AQX9	B1AQX6_MOUSE,B1AQX7_MOUSE,B1AQX8_MOUSE,B1AQX9_MOUSE	SRC kinase-signaling inhibitor 1,SRC kinase-signaling inhibitor 1,SRC kinase-signaling inhibitor 1,SRC kinase-signaling inhibitor 1	Srcin1,Srcin1,Srcin1,Srcin1	ENSMUST00000107593,ENSMUST00000107590,ENSMUST00000126287,ENSMUST00000107596	ENSMUSP00000103219,ENSMUSP00000103216,ENSMUSP00000116444,ENSMUSP00000103222	ENSMUSG00000038453,ENSMUSG00000038453,ENSMUSG00000038453,ENSMUSG00000038453	877.238	957.037	797.439	-0.2629	0.0148867	0.192014
ENSMUSG00000037049	chr7	105554360	105558388	+	Smpd1	protein_coding	Q04519 Q3UL52	ASM_MOUSE	Sphingomyelin phosphodiesterase	Smpd1 Asm	ENSMUST00000046983	ENSMUSP00000042187	ENSMUSG00000037049	1226.48	1128.96	1324.01	0.229728	0.0149212	0.192192
ENSMUSG00000039218	chr17	23790662	23824741	+	Srrm2	protein_coding	Q8BTI8 E9QNB0 Q3TBY5 Q569P9 Q80U37 Q8K383	SRRM2_MOUSE	Serine/arginine repetitive matrix protein 2	Srrm2 Kiaa0324	ENSMUST00000088621	ENSMUSP00000085993	ENSMUSG00000039218	27434	29122.6	25745.3	-0.177821	0.0149853	0.19279
ENSMUSG00000041406	chr1	163945993	163994796	-	BC055324	protein_coding	E0CX91,F7DEW2,Q3TQQ9 Q3UR98 Q5RKU3 Q7TMQ3	E0CX91_MOUSE,F7DEW2_MOUSE,CA112_MOUSE	Protein BC055324,Protein BC055324,Uncharacterized protein C1orf112 homolog	BC055324,BC055324,	ENSMUST00000160926,ENSMUST00000159617,ENSMUST00000045876 ENSMUST00000097493	ENSMUSP00000124826,ENSMUSP00000125075,ENSMUSP00000043143	ENSMUSG00000041406,ENSMUSG00000041406,ENSMUSG00000041406	646.431	710.662	582.2	-0.287201	0.0150967	0.193993
ENSMUSG00000004263	chr6	124739189	124756524	-	Atn1	protein_coding	D3YYE6,O35126 P70200 Q80YQ0	D3YYE6_MOUSE,ATN1_MOUSE	Atrophin-1,Atrophin-1	Atn1,Atn1 Drpla	ENSMUST00000146872,ENSMUST00000088357 ENSMUST00000129411	ENSMUSP00000123560,ENSMUSP00000085695	ENSMUSG00000004263,ENSMUSG00000004263	4738.93	5030.65	4447.21	-0.177806	0.0151385	0.194301
ENSMUSG00000018340	chr11	54979108	55033445	-	Anxa6	protein_coding	F8WIT2,P14824 Q8BSS4	F8WIT2_MOUSE,ANXA6_MOUSE	Annexin,Annexin A6	Anxa6,Anxa6 Anx6	ENSMUST00000102727,ENSMUST00000108883	ENSMUSP00000099788,ENSMUSP00000104511	ENSMUSG00000018340,ENSMUSG00000018340	11548.5	10983.3	12113.7	0.141309	0.01518	0.194604
ENSMUSG00000035310	chr5	100441918	100500639	-	Lin54	protein_coding	D6RJL6,E9PUI8,E9PV28,E9Q8B7,F6XQ46,Q571G4 A0JLY2 Q3KQN0 Q3UYW5 Q8BMU8 Q8C107	D6RJL6_MOUSE,E9PUI8_MOUSE,E9PV28_MOUSE,E9Q8B7_MOUSE,F6XQ46_MOUSE,LIN54_MOUSE	Protein lin-54 homolog,Protein lin-54 homolog,Protein lin-54 homolog,Protein lin-54 homolog,Protein lin-54 homolog,Protein lin-54 homolog	Lin54,Lin54,Lin54,Lin54,Lin54,Lin54 Kiaa2037	ENSMUST00000144030,ENSMUST00000139234,ENSMUST00000137750 ENSMUST00000149714 ENSMUST00000154921,ENSMUST00000152387,ENSMUST00000134439,ENSMUST00000046154 ENSMUST00000123572	ENSMUSP00000120010,ENSMUSP00000119322,ENSMUSP00000120644,ENSMUSP00000121902,ENSMUSP00000118673,ENSMUSP00000041374	ENSMUSG00000035310,ENSMUSG00000035310,ENSMUSG00000035310,ENSMUSG00000035310,ENSMUSG00000035310,ENSMUSG00000035310	808.021	884.511	731.53	-0.273621	0.0152753	0.195595
ENSMUSG00000025816	chr2	5870987	5895432	-	Sec61a2	protein_coding	A2ATT9,Q9JLR1	A2ATT9_MOUSE,S61A2_MOUSE	Protein transport protein Sec61 subunit alpha isoform 2,Protein transport protein Sec61 subunit alpha isoform 2	Sec61a2,Sec61a2	ENSMUST00000026926,ENSMUST00000102981	ENSMUSP00000026926,ENSMUSP00000100046	ENSMUSG00000025816,ENSMUSG00000025816	1528.6	1656.05	1401.15	-0.24097	0.0153246	0.195997
ENSMUSG00000023505	chr6	124829547	124833701	+	Cdca3	protein_coding	D3YXE3,D3YZ81,D3Z3H6,Q99M54 O88837 Q8R2V1	D3YXE3_MOUSE,D3YZ81_MOUSE,D3Z3H6_MOUSE,CDCA3_MOUSE	Cell division cycle-associated protein 3,Cell division cycle-associated protein 3,Cell division cycle-associated protein 3,Cell division cycle-associated protein 3	Cdca3,Cdca3,Cdca3,Cdca3 C8 Grcc8 Tome1	ENSMUST00000151674,ENSMUST00000131847,ENSMUST00000150120,ENSMUST00000024270	ENSMUSP00000120626,ENSMUSP00000120410,ENSMUSP00000116849,ENSMUSP00000024270	ENSMUSG00000023505,ENSMUSG00000023505,ENSMUSG00000023505,ENSMUSG00000023505	1657.32	1776.36	1538.27	-0.207492	0.0153825	0.196276
ENSMUSG00000029516	chr5	115845278	116008947	+	Cit	protein_coding	D3YU89,D3Z1K6,D3Z1U0,D3Z477,E9QL53,F6SBR5,H3BJ74,H3BL47	D3YU89_MOUSE,D3Z1K6_MOUSE,D3Z1U0_MOUSE,D3Z477_MOUSE,E9QL53_MOUSE,F6SBR5_MOUSE,H3BJ74_MOUSE,H3BL47_MOUSE	Citron Rho-interacting kinase,Citron Rho-interacting kinase,Citron Rho-interacting kinase,Citron Rho-interacting kinase,Citron Rho-interacting kinase,Citron Rho-interacting kinase,Citron Rho-interacting kinase,Citron Rho-interacting kinase	Cit,Cit,Cit,Cit,Cit,Cit,Cit,Cit	ENSMUST00000102560,ENSMUST00000148245,ENSMUST00000112008,ENSMUST00000137952,ENSMUST00000051704,ENSMUST00000141101,ENSMUST00000123736,ENSMUST00000127976	ENSMUSP00000099620,ENSMUSP00000119769,ENSMUSP00000107639,ENSMUSP00000122745,ENSMUSP00000062049,ENSMUSP00000115802,ENSMUSP00000134875,ENSMUSP00000135649	ENSMUSG00000029516,ENSMUSG00000029516,ENSMUSG00000029516,ENSMUSG00000029516,ENSMUSG00000029516,ENSMUSG00000029516,ENSMUSG00000029516,ENSMUSG00000029516	1734.68	1884.8	1584.56	-0.250184	0.0153791	0.196276
ENSMUSG00000000958	chr14	54369442	54417780	-	Slc7a7	protein_coding	Q9Z1K8 Q9QWS1	YLAT1_MOUSE	Y+L amino acid transporter 1	Slc7a7	ENSMUST00000000984	ENSMUSP00000000984	ENSMUSG00000000958	513.405	456.965	569.845	0.317862	0.0154896	0.19695
ENSMUSG00000025969	chr1	62703285	62818695	+	Nrp2	protein_coding	O35375 B1AT44 O35373 O35374 O35376 O35377 O35378	NRP2_MOUSE	Neuropilin-2	Nrp2	ENSMUST00000027112 ENSMUST00000063594 ENSMUST00000075144 ENSMUST00000102822 ENSMUST00000114155 ENSMUST00000114157	ENSMUSP00000027112	ENSMUSG00000025969	3191.51	2998.6	3384.41	0.174561	0.0154875	0.19695
ENSMUSG00000072066	chr13	62603013	62624182	-	6720489N17Rik	protein_coding	F7A5Y7	F7A5Y7_MOUSE	Protein 6720489N17Rik	6720489N17Rik	ENSMUST00000091563	ENSMUSP00000089151	ENSMUSG00000072066	348.949	394.807	303.091	-0.380294	0.0154656	0.19695
ENSMUSG00000030796	chr7	45215753	45233635	+	Tead2	protein_coding	D3Z6C5,E9Q9U3,P48301 Q62297,Q80UL2	D3Z6C5_MOUSE,E9Q9U3_MOUSE,TEAD2_MOUSE,Q80UL2_MOUSE	Transcriptional enhancer factor TEF-4,Transcriptional enhancer factor TEF-4,Transcriptional enhancer factor TEF-4,Tead2 protein Transcriptional enhancer factor TEF-4	Tead2,Tead2,Tead2 Etdf Etf Tef4,Tead2	ENSMUST00000134420,ENSMUST00000155313,ENSMUST00000033060 ENSMUST00000107801,ENSMUST00000097216	ENSMUSP00000117060,ENSMUSP00000119020,ENSMUSP00000033060,ENSMUSP00000103430	ENSMUSG00000030796,ENSMUSG00000030796,ENSMUSG00000030796,ENSMUSG00000030796	4231.01	4461.84	4000.18	-0.157538	0.0155355	0.197073
ENSMUSG00000033032	chr18	61730261	61786702	-	Afap1l1	protein_coding	D6RD10,Q8BZI0 Q8BKB8	D6RD10_MOUSE,AF1L1_MOUSE	Actin filament-associated protein 1-like 1,Actin filament-associated protein 1-like 1	Afap1l1,Afap1l1	ENSMUST00000154876,ENSMUST00000120472	ENSMUSP00000121278,ENSMUSP00000113286	ENSMUSG00000033032,ENSMUSG00000033032	3676.28	3468.39	3884.18	0.163301	0.0155316	0.197073
ENSMUSG00000034560	chr10	83543941	83596469	+	A230046K03Rik	protein_coding	Q3UMB9 Q3TTQ9 Q6ZPZ7 Q8CAK8 Q8CGK0	WASH7_MOUSE	WASH complex subunit 7	Kiaa1033	ENSMUST00000038388	ENSMUSP00000039322	ENSMUSG00000034560	2876.28	3060.68	2691.89	-0.18517	0.0156083	0.197307
ENSMUSG00000035637	chr4	44981395	44990734	+	Grhpr	protein_coding	B0R075,B1AXQ0,D6REG4,Q91Z53	B0R075_MOUSE,B1AXQ0_MOUSE,D6REG4_MOUSE,GRHPR_MOUSE	Glyoxylate reductase/hydroxypyruvate reductase,Glyoxylate reductase/hydroxypyruvate reductase,Glyoxylate reductase/hydroxypyruvate reductase,Glyoxylate reductase/hydroxypyruvate reductase	Grhpr,Grhpr,Grhpr,Grhpr Glxr	ENSMUST00000128973,ENSMUST00000151148,ENSMUST00000151631,ENSMUST00000045078	ENSMUSP00000120061,ENSMUSP00000120254,ENSMUSP00000117800,ENSMUSP00000047218	ENSMUSG00000035637,ENSMUSG00000035637,ENSMUSG00000035637,ENSMUSG00000035637	473.554	418.799	528.308	0.334409	0.0156067	0.197307
ENSMUSG00000072966	chrX	135839034	135844730	+	Gprasp2	protein_coding	Q8BUY8 Q148X7	GASP2_MOUSE	G-protein coupled receptor-associated sorting protein 2	Gprasp2	ENSMUST00000113136 ENSMUST00000173804	ENSMUSP00000108761	ENSMUSG00000072966	595.085	662.755	527.415	-0.328981	0.0155972	0.197307
ENSMUSG00000056758	chr10	120361275	120476469	-	Hmga2	protein_coding	P52927 Q3UQW0,Q6NSP9	HMGA2_MOUSE,Q6NSP9_MOUSE	High mobility group protein HMGI-C,High mobility group protein HMGI-C Hmga2 protein	Hmga2 Hmgic,Hmga2	ENSMUST00000072777,ENSMUST00000159699	ENSMUSP00000072556,ENSMUSP00000123998	ENSMUSG00000056758,ENSMUSG00000056758	579.749	641.475	518.023	-0.307842	0.0156361	0.197428
ENSMUSG00000030852	chr7	130577484	130764784	+	Tacc2	protein_coding	E9Q8T1,E9Q9Z4,E9QL08	E9Q8T1_MOUSE,E9Q9Z4_MOUSE,E9QL08_MOUSE	Transforming acidic coiled-coil-containing protein 2,Transforming acidic coiled-coil-containing protein 2,Transforming acidic coiled-coil-containing protein 2	Tacc2,Tacc2,Tacc2	ENSMUST00000084513,ENSMUST00000059145,ENSMUST00000033141	ENSMUSP00000081561,ENSMUSP00000061242,ENSMUSP00000033141	ENSMUSG00000030852,ENSMUSG00000030852,ENSMUSG00000030852	1534.07	1422.57	1645.57	0.209951	0.0157286	0.197546
ENSMUSG00000044468	chr3	100451628	100489324	-	Fam46c	protein_coding	Q5SSF7 Q0P629 Q80XL2 Q9CUN7	FA46C_MOUSE	Protein FAM46C	Fam46c	ENSMUST00000061455	ENSMUSP00000056872	ENSMUSG00000044468	952.033	849.88	1054.19	0.310469	0.015729	0.197546
ENSMUSG00000047501	chr5	134945119	134946934	-	Cldn4	protein_coding	O35054	CLD4_MOUSE	Claudin-4	Cldn4 Cper Cpetr1	ENSMUST00000051401	ENSMUSP00000053420	ENSMUSG00000047501	839.584	761.003	918.166	0.27053	0.0157132	0.197546
ENSMUSG00000048756	chr10	42181841	42276755	-	Foxo3	protein_coding	H3BKE2,H9KUZ0,Q9WVH4 D3Z6Y6 Q05CZ4	H3BKE2_MOUSE,H9KUZ0_MOUSE,FOXO3_MOUSE	Forkhead box protein O3,Forkhead box protein O3,Forkhead box protein O3	Foxo3,Foxo3,Foxo3 Fkhr2 Foxo3a	ENSMUST00000177542,ENSMUST00000105501,ENSMUST00000056974 ENSMUST00000105502 ENSMUST00000175881	ENSMUSP00000135355,ENSMUSP00000101140,ENSMUSP00000050683	ENSMUSG00000048756,ENSMUSG00000048756,ENSMUSG00000048756	4501	4228.96	4773.05	0.174571	0.0157025	0.197546
ENSMUSG00000049422	chr10	75935573	75937725	+	Chchd10	protein_coding	Q7TNL9	Q7TNL9_MOUSE	Coiled-coil-helix-coiled-coil-helix domain containing 10 Nur77 downstream gene 2 Nur77 downstream protein 2 Protein Chchd10	Chchd10 Ndg2 mCG_3110	ENSMUST00000058906	ENSMUSP00000059575	ENSMUSG00000049422	441.28	390.373	492.186	0.333587	0.0157361	0.197546
ENSMUSG00000040929	chr19	27761721	28011166	-	Rfx3	protein_coding	G3UWP0,G3UZZ6,G5E890,P48381 Q8BLW2 Q8C0R3 Q8VBY6	G3UWP0_MOUSE,G3UZZ6_MOUSE,G5E890_MOUSE,RFX3_MOUSE	Transcription factor RFX3,Transcription factor RFX3,Transcription factor RFX3,Transcription factor RFX3	Rfx3,Rfx3,Rfx3,Rfx3	ENSMUST00000173863,ENSMUST00000174420,ENSMUST00000046898,ENSMUST00000165566 ENSMUST00000172907 ENSMUST00000174850	ENSMUSP00000133367,ENSMUSP00000134700,ENSMUSP00000038760,ENSMUSP00000126313	ENSMUSG00000040929,ENSMUSG00000040929,ENSMUSG00000040929,ENSMUSG00000040929	2008.59	2151.86	1865.31	-0.20607	0.0157654	0.197685
ENSMUSG00000029103	chr5	35091501	35105766	-	Lrpap1	protein_coding	D3Z6M4,F6WMD1,P55302	D3Z6M4_MOUSE,F6WMD1_MOUSE,AMRP_MOUSE	Alpha-2-macroglobulin receptor-associated protein,Alpha-2-macroglobulin receptor-associated protein,Alpha-2-macroglobulin receptor-associated protein	Lrpap1,Lrpap1,Lrpap1	ENSMUST00000132754,ENSMUST00000153664,ENSMUST00000030986	ENSMUSP00000116145,ENSMUSP00000120233,ENSMUSP00000030986	ENSMUSG00000029103,ENSMUSG00000029103,ENSMUSG00000029103	3726.69	3502.39	3950.98	0.173826	0.0157993	0.197724
ENSMUSG00000038967	chr11	95026258	95041354	-	Pdk2	protein_coding	Q9JK42 Q8VC63	PDK2_MOUSE	[Pyruvate dehydrogenase (acetyl-transferring)] kinase isozyme 2, mitochondrial	Pdk2	ENSMUST00000038431	ENSMUSP00000041447	ENSMUSG00000038967	1063.91	977.848	1149.97	0.233699	0.015823	0.197724
ENSMUSG00000059588	chr2	84330626	84425411	-	Calcrl	protein_coding	Q9R1W5 Q9QXH8 Q9WUP2	CALRL_MOUSE	Calcitonin gene-related peptide type 1 receptor	Calcrl Crlr	ENSMUST00000074262 ENSMUST00000099944	ENSMUSP00000073875	ENSMUSG00000059588	7429.4	7021.83	7836.97	0.158427	0.0158206	0.197724
ENSMUSG00000015766	chr6	137477245	137654876	-	Eps8	protein_coding	D3YXC3,D3Z5I5,D3Z7F4,Q08509 Q3TM41,Q3UGL1	D3YXC3_MOUSE,D3Z5I5_MOUSE,D3Z7F4_MOUSE,EPS8_MOUSE,Q3UGL1_MOUSE	Epidermal growth factor receptor kinase substrate 8,Epidermal growth factor receptor kinase substrate 8,Epidermal growth factor receptor kinase substrate 8,Epidermal growth factor receptor kinase substrate 8,Epidermal growth factor receptor kinase substrate 8	Eps8,Eps8,Eps8,Eps8,Eps8	ENSMUST00000134630,ENSMUST00000132920,ENSMUST00000146442,ENSMUST00000058210 ENSMUST00000100841 ENSMUST00000111878,ENSMUST00000147526	ENSMUSP00000120648,ENSMUSP00000122517,ENSMUSP00000119997,ENSMUSP00000052776,ENSMUSP00000120044	ENSMUSG00000015766,ENSMUSG00000015766,ENSMUSG00000015766,ENSMUSG00000015766,ENSMUSG00000015766	977.665	895.791	1059.54	0.241954	0.0158422	0.197737
ENSMUSG00000015120	chr17	25261916	25274622	-	Ube2i	protein_coding	G3UWJ1,G3UWL6,G3UYP0,G3UZL6,P63280 P50550 Q15698 Q6RUT3 Q86VB3,Q8CFZ0	G3UWJ1_MOUSE,G3UWL6_MOUSE,G3UYP0_MOUSE,G3UZL6_MOUSE,UBC9_MOUSE,Q8CFZ0_MOUSE	SUMO-conjugating enzyme UBC9,SUMO-conjugating enzyme UBC9,SUMO-conjugating enzyme UBC9,SUMO-conjugating enzyme UBC9,SUMO-conjugating enzyme UBC9,SUMO-conjugating enzyme UBC9 Ube2i protein	Ube2i,Ube2i,Ube2i,Ube2i,Ube2i Ubc9 Ubce2i Ubce9,Ube2i	ENSMUST00000172520,ENSMUST00000173231,ENSMUST00000173621,ENSMUST00000174216,ENSMUST00000049911 ENSMUST00000172618 ENSMUST00000173084 ENSMUST00000173713 ENSMUST00000174001 ENSMUST00000174031,ENSMUST00000172587 ENSMUST00000172868	ENSMUSP00000133311,ENSMUSP00000133338,ENSMUSP00000134161,ENSMUSP00000134546,ENSMUSP00000055714,ENSMUSP00000133590	ENSMUSG00000015120,ENSMUSG00000015120,ENSMUSG00000015120,ENSMUSG00000015120,ENSMUSG00000015120,ENSMUSG00000015120	4603.35	4854.16	4352.54	-0.157331	0.0158811	0.197808
ENSMUSG00000027605	chr2	155517948	155585724	+	Acss2	protein_coding	A2AQN4,A2AQN5,D6RHA7,F7CU63,Q9QXG4 Q8BK97	A2AQN4_MOUSE,A2AQN5_MOUSE,D6RHA7_MOUSE,F7CU63_MOUSE,ACSA_MOUSE	Acetyl-coenzyme A synthetase, cytoplasmic,Acetyl-coenzyme A synthetase, cytoplasmic,Acetyl-coenzyme A synthetase, cytoplasmic,Acetyl-coenzyme A synthetase, cytoplasmic,Acetyl-coenzyme A synthetase, cytoplasmic	Acss2,Acss2,Acss2,Acss2,Acss2 Acas2 Acecs1	ENSMUST00000103142,ENSMUST00000065973,ENSMUST00000133654,ENSMUST00000151781,ENSMUST00000029135	ENSMUSP00000099431,ENSMUSP00000068776,ENSMUSP00000116501,ENSMUSP00000122545,ENSMUSP00000029135	ENSMUSG00000027605,ENSMUSG00000027605,ENSMUSG00000027605,ENSMUSG00000027605,ENSMUSG00000027605	652.905	587.647	718.164	0.288918	0.0159061	0.197808
ENSMUSG00000045382	chr1	128588199	128592293	-	Cxcr4	protein_coding	E9Q2D4,P70658 O09059 O09062 P70233 P70346 Q4KMW1	E9Q2D4_MOUSE,CXCR4_MOUSE	C-X-C chemokine receptor type 4,C-X-C chemokine receptor type 4	Cxcr4,Cxcr4 Cmkar4 Lestr Sdf1r	ENSMUST00000142893,ENSMUST00000052172	ENSMUSP00000120153,ENSMUSP00000053489	ENSMUSG00000045382,ENSMUSG00000045382	1072.59	976.196	1168.98	0.259761	0.015886	0.197808
ENSMUSG00000052560	chr15	90487482	90679432	-	Cpne8	protein_coding	Q9CYR4,Q9DB19,Q9DC53 B2RS65 Q9CUZ8	Q9CYR4_MOUSE,Q9DB19_MOUSE,CPNE8_MOUSE	Copine-8,Copine VIII Copine-8,Copine-8	Cpne8,Cpne8,Cpne8	ENSMUST00000088649,ENSMUST00000014777,ENSMUST00000064391	ENSMUSP00000086024,ENSMUSP00000014777,ENSMUSP00000067774	ENSMUSG00000052560,ENSMUSG00000052560,ENSMUSG00000052560	486.141	432.324	539.958	0.320069	0.0159206	0.197808
ENSMUSG00000027524	chr2	174760619	174784042	+	Edn3	protein_coding	E0CZ86,P48299 Q543L0	E0CZ86_MOUSE,EDN3_MOUSE	Endothelin-3,Endothelin-3	Edn3,Edn3	ENSMUST00000140908,ENSMUST00000029030	ENSMUSP00000125602,ENSMUSP00000029030	ENSMUSG00000027524,ENSMUSG00000027524	2990.44	2787.34	3193.53	0.196194	0.0159392	0.197813
ENSMUSG00000024542	chr18	67800107	67885168	+	Cep192	protein_coding	E9Q4Y4	E9Q4Y4_MOUSE	Protein Cep192	Cep192	ENSMUST00000025425	ENSMUSP00000025425	ENSMUSG00000024542	2282.57	2463.41	2101.73	-0.228977	0.0159593	0.197837
ENSMUSG00000021186	chr12	101746565	101819055	-	Fbln5	protein_coding	Q9WVH9 Q541Z7	FBLN5_MOUSE	Fibulin-5	Fbln5 Dance	ENSMUST00000021603	ENSMUSP00000021603	ENSMUSG00000021186	3843.09	3601.93	4084.24	0.18125	0.0160091	0.198004
ENSMUSG00000062127	chr3	105001915	105053146	-	Cttnbp2nl	protein_coding	Q99LJ0 Q6ZPR0 Q8BSV1 Q922L8	CT2NL_MOUSE	CTTNBP2 N-terminal-like protein	Cttnbp2nl Kiaa1433	ENSMUST00000077548 ENSMUST00000098763	ENSMUSP00000076751	ENSMUSG00000062127	2812.55	2635.08	2990.02	0.182244	0.0160037	0.198004
ENSMUSG00000015053	chr6	88193891	88207030	+	Gata2	protein_coding	O09100	GATA2_MOUSE	Endothelial transcription factor GATA-2	Gata2	ENSMUST00000015197 ENSMUST00000170089	ENSMUSP00000015197	ENSMUSG00000015053	575.331	515.664	634.998	0.299795	0.0160416	0.19818
ENSMUSG00000031897	chr8	105935728	105938392	-	Psmb10	protein_coding	O35955 O08687 Q99KC5	PSB10_MOUSE	Proteasome subunit beta type-10	Psmb10 Lmp10 Mecl1	ENSMUST00000034369	ENSMUSP00000034369	ENSMUSG00000031897	407.332	356.08	458.584	0.364082	0.0160871	0.198517
ENSMUSG00000029169	chr5	52150203	52190514	-	Dhx15	protein_coding	O35286 Q99L91	DHX15_MOUSE	Putative pre-mRNA-splicing factor ATP-dependent RNA helicase DHX15	Dhx15 Ddx15 Deah9	ENSMUST00000031061	ENSMUSP00000031061	ENSMUSG00000029169	8696.79	9153.05	8240.54	-0.151495	0.0161651	0.199179
ENSMUSG00000066037	chr4	136310942	136359447	+	Hnrnpr	protein_coding	A2AW40,A2AW41,F7B5B5,Q8VHM5,S4R1E9,V9GWW3	A2AW40_MOUSE,A2AW41_MOUSE,F7B5B5_MOUSE,Q8VHM5_MOUSE,S4R1E9_MOUSE,V9GWW3_MOUSE	Protein Hnrnpr,Protein Hnrnpr,Protein Hnrnpr,Heterogeneous nuclear ribonucleoprotein R Protein Hnrnpr,Protein Hnrnpr,Protein Hnrnpr	Hnrnpr,Hnrnpr,Hnrnpr,Hnrnpr Hnrpr,Hnrnpr,Hnrnpr	ENSMUST00000156259,ENSMUST00000134524,ENSMUST00000084219 ENSMUST00000131671,ENSMUST00000105850 ENSMUST00000148843,ENSMUST00000125696,ENSMUST00000145282	ENSMUSP00000117096,ENSMUSP00000119666,ENSMUSP00000081239,ENSMUSP00000101476,ENSMUSP00000138190,ENSMUSP00000138859	ENSMUSG00000066037,ENSMUSG00000066037,ENSMUSG00000066037,ENSMUSG00000066037,ENSMUSG00000066037,ENSMUSG00000066037	6825.92	7204.5	6447.34	-0.16017	0.0161774	0.199179
ENSMUSG00000029622	chr5	145114215	145130705	+	Arpc1b	protein_coding	D3Z6S0,F6THG2,F6VVE6,Q9WV32 Q9CRC4	D3Z6S0_MOUSE,F6THG2_MOUSE,F6VVE6_MOUSE,ARC1B_MOUSE	Actin-related protein 2/3 complex subunit 1B,Actin-related protein 2/3 complex subunit 1B,Actin-related protein 2/3 complex subunit 1B,Actin-related protein 2/3 complex subunit 1B	Arpc1b,Arpc1b,Arpc1b,Arpc1b	ENSMUST00000141602,ENSMUST00000138922,ENSMUST00000136074,ENSMUST00000085679	ENSMUSP00000122340,ENSMUSP00000115515,ENSMUSP00000115022,ENSMUSP00000082822	ENSMUSG00000029622,ENSMUSG00000029622,ENSMUSG00000029622,ENSMUSG00000029622	2779.76	2604.93	2954.59	0.181648	0.0162457	0.199794
ENSMUSG00000015405	chrX	164139332	164188420	+	Ace2	protein_coding	F6X479,Q8R0I0 Q99N70 Q99N71	F6X479_MOUSE,ACE2_MOUSE	Angiotensin-converting enzyme 2,Angiotensin-converting enzyme 2	Ace2,Ace2	ENSMUST00000131543,ENSMUST00000073973 ENSMUST00000112271	ENSMUSP00000123313,ENSMUSP00000073626	ENSMUSG00000015405,ENSMUSG00000015405	445.141	392.114	498.169	0.34458	0.0163712	0.201111
ENSMUSG00000020611	chr11	109362831	109401369	+	Gna13	protein_coding	P27601 Q6PF99,Q9D034	GNA13_MOUSE,Q9D034_MOUSE	Guanine nucleotide-binding protein subunit alpha-13,Guanine nucleotide-binding protein subunit alpha-13	Gna13 Gna-13,Gna13	ENSMUST00000020930,ENSMUST00000106702	ENSMUSP00000020930,ENSMUSP00000102313	ENSMUSG00000020611,ENSMUSG00000020611	2929.1	2743.09	3115.12	0.183423	0.0165401	0.201819
ENSMUSG00000021943	chr14	33923587	33935280	+	Gdf10	protein_coding	P97737 Q6PE07	BMP3B_MOUSE	Bone morphogenetic protein 3B	Gdf10 Bmp3b	ENSMUST00000168727	ENSMUSP00000128621	ENSMUSG00000021943	285.118	245.211	325.026	0.405091	0.0164727	0.201819
ENSMUSG00000030254	chr6	112619850	112696686	-	Rad18	protein_coding	D3Z733,D3Z734,E9Q392,F6ZKR0,Q9QXK2 Q9CZB8,W4VSP9	D3Z733_MOUSE,D3Z734_MOUSE,E9Q392_MOUSE,F6ZKR0_MOUSE,RAD18_MOUSE,W4VSP9_MOUSE	E3 ubiquitin-protein ligase RAD18,E3 ubiquitin-protein ligase RAD18,E3 ubiquitin-protein ligase RAD18,E3 ubiquitin-protein ligase RAD18,E3 ubiquitin-protein ligase RAD18,E3 ubiquitin-protein ligase RAD18 RAD18 homolog (S, cerevisiae), isoform CRA_d	Rad18,Rad18,Rad18,Rad18,Rad18 Rad18sc,Rad18 mCG_128966	ENSMUST00000113182,ENSMUST00000113180,ENSMUST00000068487,ENSMUST00000142079,ENSMUST00000077088,ENSMUST00000156063	ENSMUSP00000108807,ENSMUSP00000108805,ENSMUSP00000070619,ENSMUSP00000117582,ENSMUSP00000076341,ENSMUSP00000138558	ENSMUSG00000030254,ENSMUSG00000030254,ENSMUSG00000030254,ENSMUSG00000030254,ENSMUSG00000030254,ENSMUSG00000030254	674.759	739.823	609.696	-0.278673	0.0164565	0.201819
ENSMUSG00000034341	chr11	116078573	116086995	-	Wbp2	protein_coding	A2A860,P97765	A2A860_MOUSE,WBP2_MOUSE	WW domain binding protein 2, isoform CRA_a WW domain-binding protein 2,WW domain-binding protein 2	Wbp2 mCG_6820,Wbp2	ENSMUST00000106444,ENSMUST00000074628	ENSMUSP00000102052,ENSMUSP00000074204	ENSMUSG00000034341,ENSMUSG00000034341	2056.36	1920.54	2192.19	0.19077	0.0165333	0.201819
ENSMUSG00000036022	chrX	53243415	53269805	-	Fam122b	protein_coding	Q6NZE7 B1B0Y4 B1B0Y5 Q8BRG5 Q8CBB0 Q9D2N2	F122B_MOUSE	Protein FAM122B	Fam122b	ENSMUST00000071023 ENSMUST00000114838 ENSMUST00000114841	ENSMUSP00000069112	ENSMUSG00000036022	946.407	1029.36	863.458	-0.253277	0.0164933	0.201819
ENSMUSG00000041696	chr9	65398488	65414853	+	Rasl12	protein_coding	E9PUV1,Q08AT1 Q3TAU9	E9PUV1_MOUSE,RASLC_MOUSE	Ras-like protein family member 12,Ras-like protein family member 12	Rasl12,Rasl12	ENSMUST00000165682,ENSMUST00000085453	ENSMUSP00000131837,ENSMUSP00000082580	ENSMUSG00000041696,ENSMUSG00000041696	2312.25	2158.39	2466.11	0.192199	0.016531	0.201819
ENSMUSG00000031628	chr8	46617449	46638706	+	Casp3	protein_coding	P70677 O08668 Q8CHV5 Q9QWI4	CASP3_MOUSE	Caspase-3	Casp3 Cpp32	ENSMUST00000093517	ENSMUSP00000091238	ENSMUSG00000031628	1455.61	1562.78	1348.45	-0.21267	0.0165657	0.201905
ENSMUSG00000031262	chrX	134308084	134362639	+	Cenpi	protein_coding	B1AV88,Q8K1K4 Q8BXU9	B1AV88_MOUSE,CENPI_MOUSE	Centromere protein I,Centromere protein I	Cenpi,Cenpi Fshprh1	ENSMUST00000129782,ENSMUST00000081064 ENSMUST00000101251	ENSMUSP00000117799,ENSMUSP00000079851	ENSMUSG00000031262,ENSMUSG00000031262	933.706	1013.99	853.425	-0.248435	0.0166044	0.20215
ENSMUSG00000020589	chr12	12262139	12376359	+	Fam49a	protein_coding	Q8BHZ0	FA49A_MOUSE	Protein FAM49A	Fam49a D12Ertd553e	ENSMUST00000069005 ENSMUST00000069066	ENSMUSP00000068125	ENSMUSG00000020589	1407.88	1302.39	1513.38	0.216459	0.0166965	0.203044
ENSMUSG00000025272	chrX	150645304	150657583	-	Tro	protein_coding	A2AFN3,E9Q098,E9Q160,E9Q1E1,E9Q1Q4,E9Q886,Q6DIC6	A2AFN3_MOUSE,E9Q098_MOUSE,E9Q160_MOUSE,E9Q1E1_MOUSE,E9Q1Q4_MOUSE,E9Q886_MOUSE,Q6DIC6_MOUSE	Protein Tro,Protein Tro,Protein Tro,Protein Tro,Protein Tro,Protein Tro,Protein Tro Tro protein	Tro,Tro,Tro,Tro,Tro,Tro,Tro	ENSMUST00000148604,ENSMUST00000151403,ENSMUST00000163969,ENSMUST00000163450,ENSMUST00000164071,ENSMUST00000087253,ENSMUST00000087258 ENSMUST00000112709	ENSMUSP00000116905,ENSMUSP00000120457,ENSMUSP00000126054,ENSMUSP00000127689,ENSMUSP00000126042,ENSMUSP00000084508,ENSMUSP00000084513	ENSMUSG00000025272,ENSMUSG00000025272,ENSMUSG00000025272,ENSMUSG00000025272,ENSMUSG00000025272,ENSMUSG00000025272,ENSMUSG00000025272	920.48	1004.03	836.933	-0.262327	0.0168166	0.204209
ENSMUSG00000031881	chr8	104614141	104624396	-	Cdh16	protein_coding	O88338 Q9JLZ5	CAD16_MOUSE	Cadherin-16	Cdh16	ENSMUST00000163783	ENSMUSP00000129663	ENSMUSG00000031881	2401.1	2245.6	2556.61	0.187057	0.0168298	0.204209
ENSMUSG00000017677	chr11	79239372	79254671	-	Wsb1	protein_coding	E9Q647,F6ZUJ8,M0QWT9,O54927	E9Q647_MOUSE,F6ZUJ8_MOUSE,M0QWT9_MOUSE,WSB1_MOUSE	WD repeat and SOCS box-containing protein 1,WD repeat and SOCS box-containing protein 1,WD repeat and SOCS box-containing protein 1,WD repeat and SOCS box-containing protein 1	Wsb1,Wsb1,Wsb1,Wsb1	ENSMUST00000131848,ENSMUST00000131818,ENSMUST00000145772,ENSMUST00000017821	ENSMUSP00000128181,ENSMUSP00000131290,ENSMUSP00000137999,ENSMUSP00000017821	ENSMUSG00000017677,ENSMUSG00000017677,ENSMUSG00000017677,ENSMUSG00000017677	8037.24	8468.23	7606.25	-0.154856	0.0168809	0.20432
ENSMUSG00000047749	chr6	38287396	38299259	-	Zc3hav1l	protein_coding	Q8BFR1 Q8C3Z2	ZCCHL_MOUSE	Zinc finger CCCH-type antiviral protein 1-like	Zc3hav1l	ENSMUST00000058524	ENSMUSP00000062475	ENSMUSG00000047749	1951.97	2094.3	1809.63	-0.210665	0.0168953	0.20432
ENSMUSG00000087153	chr8	19682268	19698275	+	Gm6483	protein_coding	D3Z1Y8	D3Z1Y8_MOUSE	Protein Gm6483	Gm6483	ENSMUST00000127799 ENSMUST00000153710	ENSMUSP00000119559	ENSMUSG00000087153	275.005	316.978	233.032	-0.44222	0.0168871	0.20432
ENSMUSG00000058729	chr1	180641150	180690694	+	Lin9	protein_coding	Q8C735 Q5TKA0 Q8C9D8	LIN9_MOUSE	Protein lin-9 homolog	Lin9 Bara Tgs1	ENSMUST00000085803 ENSMUST00000085804	ENSMUSP00000082959	ENSMUSG00000058729	761.179	834.247	688.111	-0.277468	0.0169152	0.204334
ENSMUSG00000019214	chr17	25718926	25727419	-	Chtf18	protein_coding	E9PVJ3,E9Q2M3,F6YVH6,F6ZBE7,Q8BIW9 Q8R1R7	E9PVJ3_MOUSE,E9Q2M3_MOUSE,F6YVH6_MOUSE,F6ZBE7_MOUSE,CTF18_MOUSE	Chromosome transmission fidelity protein 18 homolog,Chromosome transmission fidelity protein 18 homolog,Chromosome transmission fidelity protein 18 homolog,Chromosome transmission fidelity protein 18 homolog,Chromosome transmission fidelity protein 18 homolog	Chtf18,Chtf18,Chtf18,Chtf18,Chtf18 Ctf18	ENSMUST00000170070,ENSMUST00000170575,ENSMUST00000169767,ENSMUST00000167940,ENSMUST00000048054	ENSMUSP00000131768,ENSMUSP00000131366,ENSMUSP00000129694,ENSMUSP00000131349,ENSMUSP00000043896	ENSMUSG00000019214,ENSMUSG00000019214,ENSMUSG00000019214,ENSMUSG00000019214,ENSMUSG00000019214	504.749	559.212	450.287	-0.311926	0.0169924	0.20504
ENSMUSG00000022385	chr15	85859707	85876572	+	Gtse1	protein_coding	Q8R080 O89015 Q9CSG9	GTSE1_MOUSE	G2 and S phase-expressed protein 1	Gtse1 B99	ENSMUST00000170629	ENSMUSP00000128759	ENSMUSG00000022385	568.613	628.805	508.421	-0.306047	0.0170596	0.205395
ENSMUSG00000031770	chr8	94386438	94395377	+	Herpud1	protein_coding	Q8C4N0,Q9JJK5	Q8C4N0_MOUSE,HERP1_MOUSE	Homocysteine-responsive endoplasmic reticulum-resident ubiquitin-like domain member 1 protein,Homocysteine-responsive endoplasmic reticulum-resident ubiquitin-like domain member 1 protein	Herpud1,Herpud1	ENSMUST00000034220,ENSMUST00000161576	ENSMUSP00000034220,ENSMUSP00000124201	ENSMUSG00000031770,ENSMUSG00000031770	1928.64	1792.25	2065.02	0.204279	0.0170427	0.205395
ENSMUSG00000029687	chr6	47530274	47595341	-	Ezh2	protein_coding	D3Z774,E9PWK3,F6T3Z0,F7AQX0,F7CW38,Q61188 Q99L74 Q9R090,Q6AXH7	D3Z774_MOUSE,E9PWK3_MOUSE,F6T3Z0_MOUSE,F7AQX0_MOUSE,F7CW38_MOUSE,EZH2_MOUSE,Q6AXH7_MOUSE	Histone-lysine N-methyltransferase EZH2,Histone-lysine N-methyltransferase EZH2,Histone-lysine N-methyltransferase EZH2,Histone-lysine N-methyltransferase EZH2,Histone-lysine N-methyltransferase EZH2,Histone-lysine N-methyltransferase EZH2,Ezh2 protein Histone-lysine N-methyltransferase EZH2	Ezh2,Ezh2,Ezh2,Ezh2,Ezh2,Ezh2 Enx1h,Ezh2	ENSMUST00000114616,ENSMUST00000133043,ENSMUST00000164006,ENSMUST00000169889,ENSMUST00000167278,ENSMUST00000081721 ENSMUST00000092648,ENSMUST00000114618	ENSMUSP00000110263,ENSMUSP00000118663,ENSMUSP00000133195,ENSMUSP00000126481,ENSMUSP00000128542,ENSMUSP00000080419,ENSMUSP00000110265	ENSMUSG00000029687,ENSMUSG00000029687,ENSMUSG00000029687,ENSMUSG00000029687,ENSMUSG00000029687,ENSMUSG00000029687,ENSMUSG00000029687	3006.3	3195.61	2817	-0.181871	0.01712	0.205894
ENSMUSG00000053716	chr9	106368632	106375724	+	Dusp7	protein_coding	G3UX16,Q91Z46 E9PVF4 E9QMS8 Q3USH2	G3UX16_MOUSE,DUS7_MOUSE	Dual-specificity protein phosphatase 7,Dual specificity protein phosphatase 7	Dusp7,Dusp7	ENSMUST00000173748,ENSMUST00000172306	ENSMUSP00000133511,ENSMUSP00000126984	ENSMUSG00000053716,ENSMUSG00000053716	1266.11	1168.73	1363.5	0.222189	0.0172242	0.206919
ENSMUSG00000024426	chr17	35897595	35910075	-	Atat1	protein_coding	B8JJ72,F6RPX5,F7BUT2,F7CID0,Q8K341 B8JJ75 B8JJ77 Q3UZR9 Q8BM67 Q8C1D1 Q8K2M7	B8JJ72_MOUSE,F6RPX5_MOUSE,F7BUT2_MOUSE,F7CID0_MOUSE,ATAT_MOUSE	Alpha-tubulin N-acetyltransferase 1,Alpha-tubulin N-acetyltransferase 1,Alpha-tubulin N-acetyltransferase 1,Alpha-tubulin N-acetyltransferase 1,Alpha-tubulin N-acetyltransferase 1	Atat1,Atat1,Atat1,Atat1,Atat1 Mec17	ENSMUST00000141132,ENSMUST00000140292,ENSMUST00000126744,ENSMUST00000137182,ENSMUST00000056034 ENSMUST00000061052 ENSMUST00000077494 ENSMUST00000141662 ENSMUST00000149277	ENSMUSP00000117824,ENSMUSP00000119039,ENSMUSP00000122211,ENSMUSP00000122626,ENSMUSP00000053853	ENSMUSG00000024426,ENSMUSG00000024426,ENSMUSG00000024426,ENSMUSG00000024426,ENSMUSG00000024426	1198.37	1294.22	1102.51	-0.231102	0.0172536	0.207043
ENSMUSG00000041431	chr13	100778650	100786570	-	Ccnb1	protein_coding	G3UY65,P24860,Q68EM3	G3UY65_MOUSE,CCNB1_MOUSE,Q68EM3_MOUSE	G2/mitotic-specific cyclin-B1,G2/mitotic-specific cyclin-B1,Ccnb1 protein G2/mitotic-specific cyclin-B1	Ccnb1,Ccnb1 Ccn-2 Ccnb1-rs13 Cycb Cycb1,Ccnb1	ENSMUST00000174038,ENSMUST00000072119,ENSMUST00000091295	ENSMUSP00000133962,ENSMUSP00000071989,ENSMUSP00000088841	ENSMUSG00000041431,ENSMUSG00000041431,ENSMUSG00000041431	1705.77	1822.06	1589.48	-0.196899	0.0173973	0.208308
ENSMUSG00000057286	chr11	116675303	116694868	-	St6galnac2	protein_coding	P70277 Q3UWG0 Q9DC24	SIA7B_MOUSE	Alpha-N-acetylgalactosaminide alpha-2,6-sialyltransferase 2	St6galnac2 Siat7 Siat7b	ENSMUST00000079545	ENSMUSP00000078501	ENSMUSG00000057286	3204.75	2982.65	3426.86	0.200231	0.0173823	0.208308
ENSMUSG00000026956	chr2	25359889	25365682	-	Uap1l1	protein_coding	Q3TW96 A1L3D3 Q6KAP8 Q6NVB6 Q80XP4	UAP1L_MOUSE	UDP-N-acetylhexosamine pyrophosphorylase-like protein 1	Uap1l1	ENSMUST00000102925	ENSMUSP00000099989	ENSMUSG00000026956	300.607	259.38	341.834	0.396892	0.0174314	0.208488
ENSMUSG00000055980	chr1	82233101	82291416	-	Irs1	protein_coding	Q543V3	Q543V3_MOUSE	Insulin receptor substrate 1	Irs1 mCG_20326	ENSMUST00000069799	ENSMUSP00000063795	ENSMUSG00000055980	1070.84	1160.89	980.785	-0.242988	0.0174734	0.20876
ENSMUSG00000032501	chr15	59648350	59656550	+	Trib1	protein_coding	Q8K4K4 Q8BFS7 Q8BJR9 Q8BZX3 Q91W04	TRIB1_MOUSE	Tribbles homolog 1	Trib1 Trb1	ENSMUST00000067543 ENSMUST00000118228	ENSMUSP00000068834	ENSMUSG00000032501	653.147	589.578	716.715	0.281285	0.0174963	0.208805
ENSMUSG00000030772	chr7	112116019	112159057	-	Dkk3	protein_coding	Q9QUN9	DKK3_MOUSE	Dickkopf-related protein 3	Dkk3	ENSMUST00000033036	ENSMUSP00000033036	ENSMUSG00000030772	2017.5	1871.75	2163.25	0.208706	0.0176195	0.209696
ENSMUSG00000039168	chr15	31224314	31274341	+	Dap	protein_coding	Q91XC8	DAP1_MOUSE	Death-associated protein 1	Dap	ENSMUST00000044524	ENSMUSP00000047186	ENSMUSG00000039168	1791.36	1662.85	1919.86	0.207226	0.0176288	0.209696
ENSMUSG00000046312	chr4	41495604	41503076	-	AI464131	protein_coding	A2ANN7,Q69ZQ1 A2ANN6 B2RU42	A2ANN7_MOUSE,K1161_MOUSE	Protein AI464131,Uncharacterized family 31 glucosidase KIAA1161	AI464131,Kiaa1161	ENSMUST00000149596,ENSMUST00000054920	ENSMUSP00000122357,ENSMUSP00000059038	ENSMUSG00000046312,ENSMUSG00000046312	372.539	323.185	421.893	0.383476	0.0175919	0.209696
ENSMUSG00000028568	chr4	108814295	108833614	-	Btf3l4	protein_coding	Q9CQH7	BT3L4_MOUSE	Transcription factor BTF3 homolog 4	Btf3l4	ENSMUST00000102739 ENSMUST00000102740 ENSMUST00000102741 ENSMUST00000102742	ENSMUSP00000099800	ENSMUSG00000028568	773.517	844.363	702.67	-0.264672	0.0177351	0.210271
ENSMUSG00000036054	chr8	70234226	70279915	+	Sugp2	protein_coding	D3YVJ0,D3Z0I4,F6X398,Q8CH09 Q6PG19 Q80UY8 Q8BY32 Q8CFM0	D3YVJ0_MOUSE,D3Z0I4_MOUSE,F6X398_MOUSE,SUGP2_MOUSE	SURP and G-patch domain-containing protein 2,SURP and G-patch domain-containing protein 2,SURP and G-patch domain-containing protein 2,SURP and G-patch domain-containing protein 2	Sugp2,Sugp2,Sugp2,Sugp2 Sfrs14 Srsf14	ENSMUST00000145078,ENSMUST00000155771,ENSMUST00000126239,ENSMUST00000093458 ENSMUST00000131489 ENSMUST00000164403	ENSMUSP00000114403,ENSMUSP00000120271,ENSMUSP00000118748,ENSMUSP00000091167	ENSMUSG00000036054,ENSMUSG00000036054,ENSMUSG00000036054,ENSMUSG00000036054	1913.41	2041.18	1785.65	-0.192855	0.0177033	0.210271
ENSMUSG00000049504	chr3	53463666	53481755	+	Proser1	protein_coding	Q5PRE5 Q3UGD1 Q6PFH9 Q80WX5 Q8BYT2	PRSR1_MOUSE	Proline and serine-rich protein 1	Proser1	ENSMUST00000058577	ENSMUSP00000055253	ENSMUSG00000049504	1358.72	1457.91	1259.53	-0.210858	0.0177186	0.210271
ENSMUSG00000027078	chr2	84798828	84810335	+	Ube2l6	protein_coding	A2ATR9,Q9QZU9 Q3U8R0 Q922F1 Q9CQN0	A2ATR9_MOUSE,UB2L6_MOUSE	Ubiquitin/ISG15-conjugating enzyme E2 L6,Ubiquitin/ISG15-conjugating enzyme E2 L6	Ube2l6,Ube2l6 Ubce8	ENSMUST00000150325,ENSMUST00000102642	ENSMUSP00000119507,ENSMUSP00000099702	ENSMUSG00000027078,ENSMUSG00000027078	853.232	774.656	931.809	0.266165	0.0177833	0.21048
ENSMUSG00000067629	chr17	26941253	26972434	+	Syngap1	protein_coding	F6SEU4,J3QQ18	SYGP1_MOUSE,J3QQ18_MOUSE	Ras/Rap GTPase-activating protein SynGAP,Ras/Rap GTPase-activating protein SynGAP	Syngap1,Syngap1	ENSMUST00000081285,ENSMUST00000177932	ENSMUSP00000080038,ENSMUSP00000137587	ENSMUSG00000067629,ENSMUSG00000067629	1897.66	2040	1755.31	-0.216727	0.0177914	0.21048
ENSMUSG00000025104	chr7	81881251	81934473	-	Hdgfrp3	protein_coding	Q9JMG7 Q3TRX2 Q8BQ69 Q8BR62 Q9D2M7	HDGR3_MOUSE	Hepatoma-derived growth factor-related protein 3	Hdgfrp3	ENSMUST00000026094 ENSMUST00000107305	ENSMUSP00000026094	ENSMUSG00000025104	903.989	982.05	825.929	-0.2495	0.0178158	0.210539
ENSMUSG00000071266	chr17	22424222	22456689	+	Zfp946	protein_coding	Q8K3B4	Q8K3B4_MOUSE	Protein Zfp946 Uncharacterized protein	Zfp946 1300003B13Rik	ENSMUST00000088763 ENSMUST00000120222 ENSMUST00000167740	ENSMUSP00000086141	ENSMUSG00000071266	1010.81	1099.44	922.179	-0.253403	0.01785	0.210715
ENSMUSG00000033191	chr4	118471191	118490061	-	Tie1	protein_coding	Q06806 Q811F4 Q8BGI2,Q6PAP2	TIE1_MOUSE,Q6PAP2_MOUSE	Tyrosine-protein kinase receptor Tie-1,Tie1 protein Tyrosine-protein kinase receptor Tie-1	Tie1 Tie Tie-1,Tie1	ENSMUST00000047421,ENSMUST00000184261	ENSMUSP00000037129,ENSMUSP00000139279	ENSMUSG00000033191,ENSMUSG00000033191	5864.32	5542.53	6186.12	0.158462	0.0178734	0.210763
ENSMUSG00000029859	chr6	42358487	42373268	-	Epha1	protein_coding	Q60750 Q8CED9 Q9ESJ2	EPHA1_MOUSE	Ephrin type-A receptor 1	Epha1 Esk	ENSMUST00000073387	ENSMUSP00000073099	ENSMUSG00000029859	1293.39	1195.98	1390.8	0.217549	0.0179651	0.211615
ENSMUSG00000026977	chr2	60209887	60250676	+	March7	protein_coding	F7B2M7,Q9WV66	F7B2M7_MOUSE,MARH7_MOUSE	E3 ubiquitin-protein ligase MARCH7,E3 ubiquitin-protein ligase MARCH7	March7,March7 Axot	ENSMUST00000142485,ENSMUST00000067542 ENSMUST00000102747 ENSMUST00000102748	ENSMUSP00000116925,ENSMUSP00000068961	ENSMUSG00000026977,ENSMUSG00000026977	6790.95	7174.31	6407.6	-0.163032	0.0180049	0.211854
ENSMUSG00000040721	chr14	55060262	55092324	-	Zfhx2	protein_coding	Q2MHN3	Q2MHN3_MOUSE	Protein Zfhx2 ZFH-5	Zfhx2 zfh-5	ENSMUST00000036328	ENSMUSP00000045156	ENSMUSG00000040721	637.571	700.909	574.234	-0.287135	0.0180275	0.211891
ENSMUSG00000009575	chr15	103191544	103239816	-	Cbx5	protein_coding	D3Z0U2,Q61686 Q9CS35 Q9CXD1	D3Z0U2_MOUSE,CBX5_MOUSE	Chromobox protein homolog 5,Chromobox protein homolog 5	Cbx5,Cbx5 Hp1a	ENSMUST00000127191,ENSMUST00000108813 ENSMUST00000118152 ENSMUST00000122182	ENSMUSP00000120837,ENSMUSP00000104441	ENSMUSG00000009575,ENSMUSG00000009575	12159.4	12730.7	11588.1	-0.135648	0.0180798	0.212048
ENSMUSG00000042613	chr3	89436706	89450952	+	Pbxip1	protein_coding	D3YUE1,D3YY15,D3Z2F0,Q3TVI8 Q3TD91 Q3TWL9 Q8R319	D3YUE1_MOUSE,D3YY15_MOUSE,D3Z2F0_MOUSE,PBIP1_MOUSE	Pre-B-cell leukemia transcription factor-interacting protein 1,Pre-B-cell leukemia transcription factor-interacting protein 1,Pre-B-cell leukemia transcription factor-interacting protein 1,Pre-B-cell leukemia transcription factor-interacting protein 1	Pbxip1,Pbxip1,Pbxip1,Pbxip1 Hpip	ENSMUST00000130858,ENSMUST00000146630,ENSMUST00000145753,ENSMUST00000038942	ENSMUSP00000118496,ENSMUSP00000115904,ENSMUSP00000121658,ENSMUSP00000040429	ENSMUSG00000042613,ENSMUSG00000042613,ENSMUSG00000042613,ENSMUSG00000042613	1871.92	1748.59	1995.26	0.190279	0.018077	0.212048
ENSMUSG00000002395	chr8	71366848	71369732	+	Use1	protein_coding	D3Z6D3,E9Q496,Q9CQ56 Q3TUK0 Q80V73 Q99MB6	D3Z6D3_MOUSE,E9Q496_MOUSE,USE1_MOUSE	Vesicle transport protein USE1,Vesicle transport protein USE1,Vesicle transport protein USE1	Use1,Use1,Use1 Use1l	ENSMUST00000139541,ENSMUST00000110053,ENSMUST00000019169 ENSMUST00000110054	ENSMUSP00000122406,ENSMUSP00000105680,ENSMUSP00000019169	ENSMUSG00000002395,ENSMUSG00000002395,ENSMUSG00000002395	2388.43	2223.93	2552.92	0.198953	0.0181924	0.212707
ENSMUSG00000019823	chr10	41476314	41487032	+	Mical1	protein_coding	D3Z5P6,E9PUI4,Q8VDP3 D3Z4C6 E9PXR1 Q3TB77 Q3TBH9 Q3TX89	D3Z5P6_MOUSE,E9PUI4_MOUSE,MICA1_MOUSE	Protein-methionine sulfoxide oxidase MICAL1,Protein-methionine sulfoxide oxidase MICAL1,Protein-methionine sulfoxide oxidase MICAL1	Mical1,Mical1,Mical1 Mical Nical	ENSMUST00000151486,ENSMUST00000126436,ENSMUST00000019967 ENSMUST00000099934 ENSMUST00000119962	ENSMUSP00000116386,ENSMUSP00000114969,ENSMUSP00000019967	ENSMUSG00000019823,ENSMUSG00000019823,ENSMUSG00000019823	1165.91	1260.17	1071.65	-0.233586	0.018232	0.212707
ENSMUSG00000027160	chr2	110017817	110173360	+	Ccdc34	protein_coding	F6QKZ7,F6U3Z3,Q3UI66 Q9CS29 Q9CS41	F6QKZ7_MOUSE,F6U3Z3_MOUSE,CCD34_MOUSE	Coiled-coil domain-containing protein 34,Coiled-coil domain-containing protein 34,Coiled-coil domain-containing protein 34	Ccdc34,Ccdc34,Ccdc34	ENSMUST00000127630,ENSMUST00000150183,ENSMUST00000028580	ENSMUSP00000130554,ENSMUSP00000127363,ENSMUSP00000028580	ENSMUSG00000027160,ENSMUSG00000027160,ENSMUSG00000027160	843.831	917.924	769.737	-0.253706	0.0181653	0.212707
ENSMUSG00000028862	chr4	133240818	133252929	+	Map3k6	protein_coding								445.76	391.717	499.804	0.350758	0.0182337	0.212707
ENSMUSG00000036086	chr1	127954184	128103047	-	Zranb3	protein_coding	D3YWX9,D3Z5Z1,Q6NZP1 Q148X9 Q8BJJ3 Q8BWT6	D3YWX9_MOUSE,D3Z5Z1_MOUSE,ZRAB3_MOUSE	DNA annealing helicase and endonuclease ZRANB3,DNA annealing helicase and endonuclease ZRANB3,DNA annealing helicase and endonuclease ZRANB3	Zranb3,Zranb3,Zranb3	ENSMUST00000097597,ENSMUST00000112538,ENSMUST00000086614	ENSMUSP00000095204,ENSMUSP00000108157,ENSMUSP00000083806	ENSMUSG00000036086,ENSMUSG00000036086,ENSMUSG00000036086	638.541	708.415	568.668	-0.316509	0.0182103	0.212707
ENSMUSG00000038538	chr6	38433950	38524825	+	Ubn2	protein_coding	F6TB64,F6UTU1,Q80WC1 Q69Z27 Q80ZZ9 Q8BQ40 Q8BRI2	F6TB64_MOUSE,F6UTU1_MOUSE,UBN2_MOUSE	Ubinuclein-2,Ubinuclein-2,Ubinuclein-2	Ubn2,Ubn2,Ubn2 Kiaa2030	ENSMUST00000162593,ENSMUST00000159447,ENSMUST00000039127 ENSMUST00000160583	ENSMUSP00000124352,ENSMUSP00000123836,ENSMUSP00000036188	ENSMUSG00000038538,ENSMUSG00000038538,ENSMUSG00000038538	5180.86	5540.29	4821.44	-0.20046	0.0182982	0.213231
ENSMUSG00000023249	chr9	106470322	106476949	-	Parp3	protein_coding	E9PX17,E9Q992,Q3ULW8,Q8CFB8	E9PX17_MOUSE,E9Q992_MOUSE,Q3ULW8_MOUSE,Q8CFB8_MOUSE	Protein Parp3,Protein Parp3,Protein Parp3,NAD+ ADP-ribosyltransferase 3 PARP-3 Protein Parp3	Parp3,Parp3,Parp3,Parp3 Adprtl3	ENSMUST00000156426,ENSMUST00000125850,ENSMUST00000112479,ENSMUST00000067218 ENSMUST00000123555	ENSMUSP00000117329,ENSMUSP00000119244,ENSMUSP00000108098,ENSMUSP00000064513	ENSMUSG00000023249,ENSMUSG00000023249,ENSMUSG00000023249,ENSMUSG00000023249	648.03	572.376	723.683	0.337867	0.0183251	0.213242
ENSMUSG00000071076	chr8	70697739	70700616	+	Jund	protein_coding	P15066	JUND_MOUSE	Transcription factor jun-D	Jund Jun-d Jund1	ENSMUST00000095267	ENSMUSP00000092901	ENSMUSG00000071076	913.506	830.38	996.632	0.262999	0.0183383	0.213242
ENSMUSG00000045827	chr13	33003250	33017957	+	Serpinb9	protein_coding	O08797	O08797_MOUSE	Protein Serpinb9 SPI6 Serine (Or cysteine) peptidase inhibitor, clade B, member 9	Serpinb9 mCG_17886	ENSMUST00000006391 ENSMUST00000063191	ENSMUSP00000006391	ENSMUSG00000045827	3292.93	3071.98	3513.89	0.193844	0.018365	0.213324
ENSMUSG00000018263	chr5	119832668	119885219	+	Tbx5	protein_coding	P70326 Q9R003	TBX5_MOUSE	T-box transcription factor TBX5	Tbx5	ENSMUST00000018407	ENSMUSP00000018407	ENSMUSG00000018263	3424.02	3632.12	3215.93	-0.175522	0.018431	0.213407
ENSMUSG00000028541	chr4	117869260	117883487	-	B4galt2	protein_coding	E9PY89,E9Q8H8,Q9Z2Y2 Q3TMP2	E9PY89_MOUSE,E9Q8H8_MOUSE,B4GT2_MOUSE	Beta-1,4-galactosyltransferase 2,Beta-1,4-galactosyltransferase 2,Beta-1,4-galactosyltransferase 2	B4galt2,B4galt2,B4galt2	ENSMUST00000171548,ENSMUST00000167443,ENSMUST00000030266 ENSMUST00000084325 ENSMUST00000106421	ENSMUSP00000126539,ENSMUSP00000128771,ENSMUSP00000030266	ENSMUSG00000028541,ENSMUSG00000028541,ENSMUSG00000028541	786.824	857.033	716.615	-0.257824	0.018402	0.213407
ENSMUSG00000040649	chr6	122447296	122486313	-	Rimklb	protein_coding	M0QWN0,Q80WS1 Q69ZN3 Q8CA77 Q9D3Z1	M0QWN0_MOUSE,RIMKB_MOUSE	Beta-citrylglutamate synthase B,Beta-citrylglutamate synthase B	Rimklb,Rimklb Fam80b Kiaa1238	ENSMUST00000143701,ENSMUST00000068242 ENSMUST00000146274	ENSMUSP00000137913,ENSMUSP00000064467	ENSMUSG00000040649,ENSMUSG00000040649	645.954	724.838	567.07	-0.35358	0.0184289	0.213407
ENSMUSG00000102976	chr1	133619862	133661380	-	Zc3h11a	protein_coding								1245.14	1355.57	1134.71	-0.256372	0.0184518	0.213422
ENSMUSG00000007080	chr5	110286306	110337474	+	Pole	protein_coding	E9QAP5,E9QAP6,Q9WVF7 E9QKW1 Q9QX50	E9QAP5_MOUSE,E9QAP6_MOUSE,DPOE1_MOUSE	DNA polymerase epsilon catalytic subunit A,DNA polymerase epsilon catalytic subunit A,DNA polymerase epsilon catalytic subunit A	Pole,Pole,Pole Pole1	ENSMUST00000112482,ENSMUST00000112481,ENSMUST00000007296	ENSMUSP00000108101,ENSMUSP00000108100,ENSMUSP00000007296	ENSMUSG00000007080,ENSMUSG00000007080,ENSMUSG00000007080	1296.27	1410.64	1181.9	-0.255049	0.0187033	0.215684
ENSMUSG00000027752	chr3	54728678	54735393	-	Exosc8	protein_coding	D3YYN3,F6SGT4,Q9D753	D3YYN3_MOUSE,F6SGT4_MOUSE,EXOS8_MOUSE	Exosome complex component RRP43,Exosome complex component RRP43,Exosome complex component RRP43	Exosc8,Exosc8,Exosc8 Rrp43	ENSMUST00000153224,ENSMUST00000154787,ENSMUST00000029316	ENSMUSP00000118780,ENSMUSP00000115876,ENSMUSP00000029316	ENSMUSG00000027752,ENSMUSG00000027752,ENSMUSG00000027752	1540.88	1657.83	1423.92	-0.219278	0.0186923	0.215684
ENSMUSG00000035517	chr4	45965334	46034761	+	Tdrd7	protein_coding	Q8K1H1 B1AWG7 B1AWH5 Q8R181	TDRD7_MOUSE	Tudor domain-containing protein 7	Tdrd7 Pctaire2bp	ENSMUST00000102929	ENSMUSP00000099993	ENSMUSG00000035517	1087.64	994.636	1180.64	0.247095	0.0187068	0.215684
ENSMUSG00000001240	chr11	101246028	101259546	+	Ramp2	protein_coding	A2A4K2,A8XY18,D6RHQ4,E9Q0S5,F6YPZ1,Q9WUP0 Q6IS25	A2A4K2_MOUSE,A8XY18_MOUSE,D6RHQ4_MOUSE,E9Q0S5_MOUSE,F6YPZ1_MOUSE,RAMP2_MOUSE	Receptor activity-modifying protein 2,Receptor activity-modifying protein 2,Receptor activity-modifying protein 2,Receptor activity-modifying protein 2,Receptor activity-modifying protein 2,Receptor activity-modifying protein 2	Ramp2,Ramp2,Ramp2,Ramp2,Ramp2,Ramp2	ENSMUST00000151830,ENSMUST00000122006,ENSMUST00000149585,ENSMUST00000128260,ENSMUST00000107282,ENSMUST00000129680	ENSMUSP00000123150,ENSMUSP00000114061,ENSMUSP00000116331,ENSMUSP00000127718,ENSMUSP00000102903,ENSMUSP00000122072	ENSMUSG00000001240,ENSMUSG00000001240,ENSMUSG00000001240,ENSMUSG00000001240,ENSMUSG00000001240,ENSMUSG00000001240	2600	2442.46	2757.55	0.174989	0.0189083	0.216815
ENSMUSG00000003528	chr16	17925211	17928219	-	Slc25a1	protein_coding	F6VVY4,Q8JZU2	F6VVY4_MOUSE,Q8JZU2_MOUSE	Protein Slc25a1,Protein Slc25a1 Solute carrier family 25 (Mitochondrial carrier, citrate transporter), member 1	Slc25a1,Slc25a1 mCG_131850	ENSMUST00000131507,ENSMUST00000003622	ENSMUSP00000123613,ENSMUSP00000003622	ENSMUSG00000003528,ENSMUSG00000003528	902.605	827.173	978.036	0.24143	0.0189644	0.216815
ENSMUSG00000020099	chr10	60762610	60831581	-	Unc5b	protein_coding	Q8K1S3 Q3U4F2 Q6PFH0 Q80Y85 Q9D398	UNC5B_MOUSE	Netrin receptor UNC5B	Unc5b Unc5h2	ENSMUST00000077925	ENSMUSP00000077080	ENSMUSG00000020099	1755.44	1637.33	1873.55	0.194316	0.0189465	0.216815
ENSMUSG00000027244	chr2	91674618	91710576	-	Atg13	protein_coding	Q91YI1 A2AH18 Q80TU9	ATG13_MOUSE	Autophagy-related protein 13	Atg13 D2Ertd391e Kiaa0652	ENSMUST00000028678 ENSMUST00000076803	ENSMUSP00000028678	ENSMUSG00000027244	1299.83	1204.73	1394.93	0.211316	0.0189142	0.216815
ENSMUSG00000034329	chr11	86058138	86201193	-	Brip1	protein_coding	Q5SXJ3 Q8BJQ8 Q8BKI6	FANCJ_MOUSE	Fanconi anemia group J protein homolog	Brip1 Bach1 Fancj	ENSMUST00000044423	ENSMUSP00000043108	ENSMUSG00000034329	737.361	808.106	666.616	-0.27731	0.0189101	0.216815
ENSMUSG00000038346	chr6	125009145	125037870	+	Zfp384	protein_coding	D3YX49,D3Z517,E9Q1A5,E9QAR1 E9Q8N7,E9QAR4,E9QAR6	D3YX49_MOUSE,D3Z517_MOUSE,E9Q1A5_MOUSE,E9QAR1_MOUSE,E9QAR4_MOUSE,E9QAR6_MOUSE	Protein Zfp384,Protein Zfp384,Protein Zfp384,Protein Zfp384,Protein Zfp384,Protein Zfp384	Zfp384,Zfp384,Zfp384,Zfp384,Zfp384,Zfp384	ENSMUST00000054553,ENSMUST00000152752,ENSMUST00000084275 ENSMUST00000088308 ENSMUST00000112427,ENSMUST00000046064 ENSMUST00000112428,ENSMUST00000112425,ENSMUST00000112424	ENSMUSP00000086354,ENSMUSP00000117330,ENSMUSP00000081296,ENSMUSP00000037986,ENSMUSP00000108044,ENSMUSP00000108043	ENSMUSG00000038346,ENSMUSG00000038346,ENSMUSG00000038346,ENSMUSG00000038346,ENSMUSG00000038346,ENSMUSG00000038346	2168.82	2309.46	2028.17	-0.187291	0.0189339	0.216815
ENSMUSG00000055322	chr1	73910231	74124449	-	Tns1	protein_coding	E9Q0S6	E9Q0S6_MOUSE	Protein Tns1	Tns1	ENSMUST00000169786	ENSMUSP00000127715	ENSMUSG00000055322	24536.7	23365.7	25707.8	0.137813	0.0189266	0.216815
[truncated: 611 more rows]

## Sheet: GO Enrichment
		DAVID Bioinformatics Resources 6.8
		GO analysis for down-regulated genes (301 genes with Log2 < 0.3 and p<0.05)
[truncated: 175 more rows]
