# Supplementary material for: Myh10 deficiency leads to defective extracellular matrix remodeling and pulmonary disease
Source: Nat Commun. 2018 Nov 2;9:4600. doi: 10.1038/s41467-018-06833-7 (PMC6214918; doi:10.1038/s41467-018-06833-7)
Supplement: Supplementary file 4 — Supplementary Data 2 [file 41467_2018_6833_MOESM4_ESM.xlsx]

## Sheet: MS raw data
feature_id	Uniprot accessions	Protein names	Gene names	pca.all.01	pca.all.02	pca.common.01	pca.common.02	rank.Mutant_WT	coef.Mutant_WT	quantile.Mutant_WT	p.Mutant_WT	fdr.Mutant_WT	bonf.Mutant_WT	Mutant_WT_R1	Mutant_WT_R2	Mutant_WT_R3
PG1037	B9EKP5;Q6KAM8	Filamin, alpha	Flna	0.207548	-0.00017726	-0.229578	0.00623127	1	-4.0136	0.000726744	1.21397e-05	0.00528614	0.066817	-3.93023	-4.18398	-3.92658
PG2532	Q9DCW5;P43024	Cytochrome c oxidase subunit 6A, mitochondrial;Cytochrome c oxidase subunit 6A1, mitochondrial	Cox6a1	0.0755107	0.0684801	-0.0746708	0.100699	2	3.84423	0.997638	1.29953e-05	0.00528614	0.0715262	3.81253	3.76639	3.95377
PG4864	Q8C5R8;Q32M04	phosphoribosyl pyrophosphate synthetase 1-like 1	Prps1l1	0.055043	-0.428855	-0.0103205	-0.504124	3	4.03138	0.998547	1.83686e-05	0.00528614	0.101101	4.28192	4.06364	3.74859
PG3355	Q80ZP8;Q3TMX5;A8C1V1;Q9CXI5;F6USD5;F6T4L3	Mesencephalic astrocyte-derived neurotrophic factor	Manf	-0.0785025	0.0433157	0.114376	0.0825402	4	3.5143	0.992914	1.89542e-05	0.00528614	0.104324	3.41055	3.56424	3.5681
PG1277	D3Z568;Q8BU20;Q9CQH3	NADH dehydrogenase [ubiquinone] 1 beta subcomplex subunit 5, mitochondrial	Ndufb5	0.134767	0.239838	-0.160244	0.304845	5	3.81385	0.997275	1.96342e-05	0.00528614	0.108067	3.71437	3.65637	4.07082
PG2403	Q4KML7;Q3UL48;P26040;Q3UXR4;Q3TCP5;Q8CBU4	Ezrin	Ezr	0.206882	-0.207629	-0.212295	-0.246697	6	3.66389	0.995458	1.99829e-05	0.00528614	0.109986	3.86943	3.53314	3.5891
PG3602	Q3U9U5;Q61335	B-cell receptor-associated protein 31	Bcap31	-0.101135	-0.252642	0.165364	-0.276531	7	3.61297	0.994186	1.9998e-05	0.00528614	0.110069	3.67128	3.73679	3.43085
PG1809	Q9CQG4;Q921E4;Q5QGU0;G3X8R0;Q60870	Receptor expression-enhancing protein;Receptor expression-enhancing protein 5	Reep5	-0.0232002	-0.52598	0.0924181	-0.616201	8	4.18544	0.999273	2.09423e-05	0.00528614	0.115266	4.4492	4.29852	3.80861
PG2614	P51480;P51480-2	Cyclin-dependent kinase inhibitor 2A	Cdkn2a	-0.0104706	0.0994447	0.0272943	0.145454	9	-3.44054	0.00236192	2.15035e-05	0.00528614	0.118355	-3.53905	-3.45552	-3.32703
PG0121	A0A0G2JDW7;Q6ZWU9;A0A0G2JG29	40S ribosomal protein S27	Rps27	-0.0469205	0.478745	0.0414431	0.610966	10	4.27653	0.999818	2.2987e-05	0.00528614	0.126521	3.93338	4.21917	4.67704
PG2237	P06837	Neuromodulin	Gap43	-0.228203	0.0504544	0.295619	0.103424	11	3.51372	0.992733	2.40944e-05	0.00528614	0.132616	3.32127	3.68192	3.53798
PG3684	Q3UH59;Q61879;Q5SV64;Q80T68;Q8BLI1;Q8BLI3;Q4KMN4	Myosin-10	Myh10	0.150028	-0.303849	-0.135606	-0.35941	12	-3.563	0.00163517	2.45985e-05	0.00528614	0.13539	-3.3327	-3.63019	-3.72611
PG2170	Q542I7;Q3TX23;O88653	Ragulator complex protein LAMTOR3	Lamtor3	-0.498773	-0.111912	0.637119	-0.0725669	13	4.099	0.999092	2.59779e-05	0.00528614	0.142982	3.84977	4.51397	3.93327
PG3936	Q9ESR1;Q540E6;Q921J2	GTP-binding protein Rheb	Rheb	-0.330426	0.104876	0.415448	0.178105	14	3.62663	0.994731	2.85934e-05	0.00528614	0.157378	3.34434	3.86624	3.66932
PG1491	E9Q3B5;P62876	DNA-directed RNA polymerases I, II, and III subunit RPABC5	Usp50;Polr2l	-0.105195	0.0306972	0.147796	0.0693237	15	3.18071	0.983285	2.97484e-05	0.00528614	0.163735	3.06934	3.25435	3.21842
PG4026	Q5NCJ9;Q8R1I1	Cytochrome b-c1 complex subunit 9	Uqcr10	-0.107867	-0.428262	0.187486	-0.490149	16	3.61951	0.994368	3.05979e-05	0.00528614	0.168411	3.77776	3.78181	3.29897
PG1849	G4V4Z0;A0A0A0U6W1;A0A0A0UCD5;Q61533;Q61920;Q61876;Q811N6;Q811N3;Q80SW4;Q61877;A0A0A0UEG7;A0A0A0U847;Q80SV3;Q505R5;Q811M8;Q8UMZ9;P03385;P31794;P11268;Q61919;Q60589;Q1KYM0;Q04586;P70356;P03386;A0A068EVR8;P10404	MLV-related proviral Env polyprotein;Surface protein;Transmembrane protein	env;Mela	0.27322	-0.237671	-0.290477	-0.288729	17	-3.40203	0.00308866	3.31158e-05	0.00528614	0.182269	-3.14131	-3.58012	-3.48467
PG0468	A0JNS9;P70696	Histone H2B;Histone H2B type 1-A	Hist1h2ba	0.33264	0.102607	-0.389663	0.121398	18	-3.46062	0.00199855	3.40108e-05	0.00528614	0.187195	-3.36737	-3.75032	-3.26418
PG3618	Q3UBU9;Q62446	Peptidyl-prolyl cis-trans isomerase;Peptidyl-prolyl cis-trans isomerase FKBP3	Fkbp3	0.27983	-0.186053	-0.302604	-0.22632	19	3.31396	0.987827	3.51573e-05	0.00528614	0.193506	3.54792	3.12086	3.27309
PG4125	Q8CD57;Q61160	FAS-associated death domain protein	Fadd	0.0536527	0.303785	-0.0668094	0.389425	20	3.41977	0.990552	3.52553e-05	0.00528614	0.194045	3.23673	3.31503	3.70753
PG3029	Q58EU7;Q00915	Retinol-binding protein 1	Rbp1	-0.0415593	0.18392	0.0583434	0.250998	21	-3.1344	0.00508721	3.8077e-05	0.00528614	0.209576	-3.30036	-3.14047	-2.96237
PG6234	Q9WUM5	Succinyl-CoA ligase [ADP/GDP-forming] subunit alpha, mitochondrial	Suclg1	-0.0374591	-0.0338489	0.0706563	-0.014899	22	2.92582	0.974382	3.92186e-05	0.00528614	0.215859	2.89081	2.95752	2.92912
PG2579	P48759	Pentraxin-related protein PTX3	Ptx3	0.0900844	-0.234883	-0.068281	-0.270431	23	-3.03493	0.00635901	4.05105e-05	0.00528614	0.22297	-2.8792	-3.06723	-3.15835
PG4180	Q62422	Osteoclast-stimulating factor 1	Ostf1	-0.254195	-0.0851688	0.337956	-0.0598508	24	3.11481	0.982195	4.14519e-05	0.00528614	0.228151	2.9878	3.32934	3.02728
PG6240	Q9WV55	Vesicle-associated membrane protein-associated protein A	Vapa	0.249943	0.301366	-0.305011	0.370507	25	3.43106	0.990734	4.30764e-05	0.00528614	0.237092	3.36023	3.16996	3.76298
PG2805	Q3U0D7;P62331	ADP-ribosylation factor 6	Arf6	-0.156721	-0.583513	0.259148	-0.675499	26	3.75859	0.99673	4.37449e-05	0.00528614	0.240772	3.98097	3.98918	3.30561
PG3208	Q3TCW5;Q99J45;D3YUV1	Nuclear receptor-binding protein	Nrbp1	-0.071954	0.124952	0.0999401	0.181561	27	2.95365	0.976199	4.48186e-05	0.00528614	0.246681	2.80536	2.98297	3.0726
PG5670	Q9CRA4;D3Z458	Methylsterol monooxygenase 1	Msmo1	0.391077	0.134991	-0.463206	0.156135	28	3.39815	0.990007	4.50527e-05	0.00528614	0.24797	3.50525	3.05566	3.63354
PG2463	Q9JJE1;Q3UK05;Q3U3F4;Q3TMJ8;P31938;Q3TMW4	Dual specificity mitogen-activated protein kinase kinase 1	Map2k1	-0.105942	-0.0207543	0.152789	0.00664061	29	2.86942	0.971294	4.52778e-05	0.00528614	0.249209	2.78803	2.95336	2.86686
PG4729	Q8BSL7	ADP-ribosylation factor 2	Arf2	-0.463886	-0.355341	0.614079	-0.372261	30	-3.73297	0.00109012	4.61002e-05	0.00528614	0.253736	-3.81872	-3.29999	-4.08021
PG0740	A6H6H4;Q6ZWY8;A0A0N4SVF0	Thymosin beta-10	Tmsb10	-0.453457	0.405626	0.540986	0.554872	31	3.976	0.998365	4.7019e-05	0.00528614	0.258792	3.44662	4.25721	4.22417
PG2821	P62774;A0A0J9YV46	Myotrophin	Mtpn	0.0558621	0.444975	-0.0807043	0.561424	32	3.51524	0.993096	4.82705e-05	0.00528614	0.265681	3.25005	3.38213	3.91355
PG0800	Q8C3C9;Q3U7B5;Q8BQ93;B1AV77;B1ATI0;P47740;Q8C5J1;Q99PH3;Q99PH4	Aldehyde dehydrogenase;Fatty aldehyde dehydrogenase	Aldh3a2	0.184489	0.2212	-0.219152	0.278072	33	3.11464	0.982013	4.84552e-05	0.00528614	0.266697	3.05422	2.92094	3.36875
PG2673	Q545S4;Q9CZ46;P55821	Stathmin;Stathmin-2	Stmn2	0.0466107	0.785466	-0.0965062	0.977396	34	4.53367	1	4.93651e-05	0.00528614	0.271705	4.06212	4.34377	5.19512
PG2520	P40240	CD9 antigen	Cd9	0.107128	-0.511041	-0.0670512	-0.608585	35	3.41665	0.990371	4.99191e-05	0.00528614	0.274755	3.74513	3.42279	3.08203
PG2453	Q3UAZ7;Q9CT19;Q3U566;P30681;A0A1B0GQX9	High mobility group protein B2	Hmgb2	-0.0484966	-0.655569	0.133431	-0.772173	36	3.76641	0.996911	5.11926e-05	0.00528614	0.281764	4.09244	3.92412	3.28267
PG3250	Q6PDC2;Q9CZL0;Q3TFU8;Q99KF1;Q3U7N8;Q8BLM5	Transmembrane emp24 domain-containing protein 9	Tmed9	-0.152599	-0.495589	0.247159	-0.568613	37	3.39775	0.989644	5.13867e-05	0.00528614	0.282832	3.57052	3.60847	3.01425
PG2131	O70400;Q3TZ17;S4R1V0	PDZ and LIM domain protein 1	Pdlim1	0.11123	-0.0986374	-0.104781	-0.106003	38	2.76525	0.964935	5.30814e-05	0.00528614	0.29216	2.85243	2.69038	2.75295
PG0530	A2A7Z4;Q78IG7;Q9CQH7	Transcription factor BTF3;Transcription factor BTF3 homolog 4	Btf3l4	-0.239504	-0.0135591	0.314428	0.0262804	39	2.90575	0.973656	5.42465e-05	0.00528614	0.298573	2.74474	3.09505	2.87748
PG3755	Q3UMR5;Q3UMR5-2	Calcium uniporter protein, mitochondrial	Mcu	-0.158017	0.109759	0.20567	0.170035	40	2.87344	0.97202	5.4503e-05	0.00528614	0.299985	2.68556	2.97439	2.96037
PG0784	B1AQR8;G3X9T7;O08573-3;O08573-2;O08573	Galectin;Galectin-9	Lgals9	0.270241	-0.37737	-0.275766	-0.458846	41	-3.20713	0.00436047	5.61993e-05	0.00528614	0.309321	-2.86556	-3.3565	-3.39932
PG5276	Q8VI84	Nucleolar complex protein 3 homolog	Noc3l	0.401423	0.235382	-0.483743	0.277718	42	3.36572	0.989099	5.69118e-05	0.00528614	0.313243	3.41936	2.99604	3.68177
PG1648	Q923F9;E9QPX3;Q9CXZ1;Q9CTT4	NADH dehydrogenase [ubiquinone] iron-sulfur protein 4, mitochondrial	Ndufs4	-0.188818	-0.628781	0.301723	-0.728091	43	3.68015	0.995821	5.72579e-05	0.00528614	0.315147	3.91117	3.94492	3.18437
PG4057	Q5SUW3;Q60760-2;Q60760;Q60760-3;Q3TFU9	Growth factor receptor-bound protein 10	Grb10	0.0653459	-0.0941706	-0.0494099	-0.0968231	44	2.68934	0.960211	5.74855e-05	0.00528614	0.3164	2.74798	2.65027	2.66975
PG1592	E9QJS0;Q501J4;G5E8U8;G5E8U5;Q80ZK0;Q3UVS8	28S ribosomal protein S10, mitochondrial	Mrps10	-0.0697347	0.113272	0.0981724	0.167136	45	2.77067	0.965298	5.79483e-05	0.00528614	0.318948	2.63054	2.80043	2.88105
PG2671	Q8C7Q6;P55288	Cadherin-11	Cdh11	0.156844	-0.0371626	-0.165061	-0.0347467	46	-2.72192	0.012173	5.97071e-05	0.00528614	0.328628	-2.64531	-2.84482	-2.67562
PG4145	Q61686	Chromobox protein homolog 5	Cbx5	0.0221224	0.25748	-0.0248389	0.335522	47	2.93457	0.975109	5.99126e-05	0.00528614	0.329759	2.7611	2.86376	3.17886
PG0114	A0A0F6AIX5;Q8BVA5;A0A0F6AIX6;Q8BVA5-2	UPF0554 protein C2orf43 homolog		-0.0836603	0.399453	0.0923599	0.51726	48	3.2484	0.986374	5.99911e-05	0.00528614	0.330191	2.93136	3.23533	3.57851
PG4071	Q5SX74;Q5SX75;Q60716-2;Q60716	Prolyl 4-hydroxylase subunit alpha-2	P4ha2	0.280302	-0.0964286	-0.310293	-0.117063	49	-2.87425	0.00835756	6.09445e-05	0.00528614	0.335438	-2.69296	-3.08462	-2.84517
PG0070	X1WI15;A0A0A0MQK0;Q3TYS2	Uncharacterized protein C17orf62 homolog	BC017643	0.295779	-0.416073	-0.303709	-0.508121	50	3.25248	0.986555	6.11457e-05	0.00528614	0.336546	3.63132	3.09	3.03611
PG6171	Q9R1R9;Q9R1R8;Q9QYF1;Q9R1R5	Retinol dehydrogenase 11	Rdh11;Ube-1c	0.367976	0.203541	-0.440594	0.241609	51	3.18978	0.984375	6.20325e-05	0.00528614	0.341427	3.24335	2.85283	3.47317
PG0336	A0A0R4J2A1;Q9D958	Signal peptidase complex subunit 1	Spcs1	0.266459	-0.128357	-0.290946	-0.154873	52	2.85199	0.970385	6.20344e-05	0.00528614	0.341438	3.04433	2.6587	2.85295
PG4170	Q62181	Semaphorin-3C	Sema3c	0.0667972	-0.116458	-0.0494027	-0.124121	53	-2.64888	0.0143532	6.2211e-05	0.00528614	0.34241	-2.57625	-2.6849	-2.68549
PG2214	P01027	Complement C3;Complement C3 beta chain;C3-beta-c;Complement C3 alpha chain;C3a anaphylatoxin;Acylation stimulating protein;Complement C3b alpha chain;Complement C3c alpha chain fragment 1;Complement C3dg fragment;Complement C3g fragment;Complement C3d fragment;Complement C3f fragment;Complement C3c alpha chain fragment 2	C3	0.399422	-0.144088	-0.45118	-0.184873	54	-3.09079	0.00563227	6.33178e-05	0.00528614	0.348501	-2.81413	-3.38735	-3.07091
PG5938	Q9DAM7	Transmembrane protein 263	Tmem263	0.29462	-0.110364	-0.326576	-0.135222	55	2.86666	0.97093	6.42849e-05	0.00528614	0.353824	3.06426	2.64748	2.88824
PG4188	Q63918	Serum deprivation-response protein	Sdpr	0.125356	0.0208152	-0.131423	0.0385174	56	-2.66081	0.0138081	6.47024e-05	0.00528614	0.356122	-2.63623	-2.76949	-2.57672
PG1501	E9Q3Q6;Q54AJ5;Q61490;E9Q4G8	CD166 antigen	Alcam	-0.209009	-0.0133793	0.277378	0.0240188	57	2.74425	0.963481	6.50943e-05	0.00528614	0.358279	2.60034	2.90915	2.72327
PG5589	Q9CQ48;E0CYQ2	NudC domain-containing protein 2	Nudcd2	0.109225	-0.110378	-0.101414	-0.120157	58	2.63891	0.95694	6.52917e-05	0.00528614	0.359366	2.7319	2.56785	2.61699
PG6056	Q9ER41;Q3TAL5	Torsin-1B	Tor1b	0.204991	-0.0674641	-0.221129	-0.0756153	59	2.71595	0.960938	6.55074e-05	0.00528614	0.360553	2.83762	2.56029	2.74993
PG3668	Q3UG85;Q9JHZ2;Q8C438	Progressive ankylosis protein	Ank;Ankh	0.142025	-0.0342926	-0.147291	-0.0300413	60	2.6496	0.957849	6.571e-05	0.00528614	0.361668	2.71614	2.53799	2.69466
PG2886	Q14BZ3;P70202	Latexin	Lxn	-0.254837	-0.260581	0.352665	-0.27371	61	2.91063	0.974019	6.6855e-05	0.00528614	0.36797	2.88688	3.15873	2.68627
PG0605	A2ALF2;Q6NZB0;A2ALF0;F6TQL3;A2ALF3	DnaJ homolog subfamily C member 8	Dnajc8	0.0214935	0.524029	-0.0452413	0.660624	62	3.4427	0.991461	6.80782e-05	0.00528614	0.374702	3.11141	3.32214	3.89454
PG5538	Q99MR8;Q3TVD9	Methylcrotonoyl-CoA carboxylase subunit alpha, mitochondrial	Mccc1	0.0478345	0.00479596	-0.0360011	0.0252887	63	-2.57476	0.0158067	6.92551e-05	0.00528614	0.38118	-2.58446	-2.61848	-2.52133
PG5456	Q99JP4	Anaphase-promoting complex subunit CDC26	Cdc26	0.191018	-0.0264734	-0.207414	-0.0244914	64	2.65193	0.958031	7.08936e-05	0.00528614	0.390198	2.74151	2.49971	2.71458
PG3538	Q3U484;Q62095	ATP-dependent RNA helicase DDX3Y	Ddx3y	-0.29604	0.403959	0.349937	0.540033	65	3.3383	0.988554	7.10465e-05	0.00528614	0.39104	2.89874	3.49406	3.6221
PG5337	Q91WS0	CDGSH iron-sulfur domain-containing protein 1	Cisd1	-0.132175	0.378615	0.152935	0.495795	66	3.09652	0.981286	7.20482e-05	0.00528614	0.396553	2.76441	3.12614	3.39901
PG2464	P32020-2;P32020	Non-specific lipid-transfer protein	Scp2	0.148933	0.207116	-0.17485	0.263788	67	2.74582	0.963663	7.72154e-05	0.00528614	0.424994	2.67366	2.58319	2.98061
PG0459	I6L9D3;A0A1L1SUS7;Q8K0D0-2;Q8K0D0	Cyclin-dependent kinase 17	Pctk2;Cdk17	-0.142354	-0.0542186	0.199668	-0.0312062	68	2.56227	0.951672	7.7301e-05	0.00528614	0.425465	2.4801	2.68161	2.5251
PG1818	G3X8X1;Q8VE09;E9PV21	Tetratricopeptide repeat protein 39C	Ttc39c	0.102058	-0.0849238	-0.0947306	-0.0885334	69	-2.52518	0.0178052	7.75156e-05	0.00528614	0.426646	-2.45128	-2.59531	-2.52894
PG5956	Q9DB70;H3BJZ1;H3BJ77	FUN14 domain-containing protein 1	Fundc1	-0.124617	0.495158	0.134502	0.637302	70	3.29943	0.9871	7.82985e-05	0.00528614	0.430955	2.90274	3.30104	3.6945
PG5624	Q9CQM9;A0A1B0GS58	Glutaredoxin-3	Glrx3	0.364984	0.0568017	-0.425308	0.0629082	71	2.87223	0.971657	7.96284e-05	0.00528614	0.438274	3.01079	2.56532	3.04057
PG4205	Q66JR8		Ptms	-0.195936	-0.0484131	0.264282	-0.0197677	72	2.59828	0.953852	7.9822e-05	0.00528614	0.43934	2.48244	2.75933	2.55306
PG6303	Q9Z2Z9;Q3V0X4	Glutamine--fructose-6-phosphate aminotransferase [isomerizing] 2	Gfpt2	0.000442376	-0.170885	0.0355068	-0.185094	73	-2.49894	0.0181686	8.26938e-05	0.00528614	0.455146	-2.43161	-2.47169	-2.59352
PG3808	Q3UUU4;Q9R1T4-2;Q9R1T4-3;Q9R1T4	Septin-6	Septin-6	0.17006	-0.305493	-0.159804	-0.363044	74	2.70567	0.960756	8.38823e-05	0.00528614	0.461688	2.94825	2.62279	2.54598
PG3752	Q3UMJ4;Q8R0A0	General transcription factor IIF subunit 2	Gtf2f2	0.209589	0.350407	-0.259896	0.433594	75	2.98631	0.977108	8.40288e-05	0.00528614	0.462495	2.86373	2.7482	3.34698
PG3874	Q497Z1;Q8C0E3;Q8C0E3-2;A3KMJ7;Q66JW4;B7ZN75;Q7TMQ8	Tripartite motif-containing protein 47	Trim47	0.170805	-0.117041	-0.175673	-0.133292	76	-2.53179	0.0176235	8.52088e-05	0.00528614	0.468989	-2.40012	-2.65079	-2.54446
PG5963	Q9DBC7;Q8C3Z4;Q3TYK4;Q3UBA7;Q9CS50	cAMP-dependent protein kinase type I-alpha regulatory subunit;cAMP-dependent protein kinase type I-alpha regulatory subunit, N-terminally processed	Prkar1a	-0.192181	0.0336072	0.253209	0.0799487	77	-2.57194	0.0159884	8.56632e-05	0.00528614	0.47149	-2.73411	-2.42934	-2.55236
PG3636	Q4FK38;Q3UDJ2;Q69ZN1;Q8R0X7;D6REF7	Sphingosine-1-phosphate lyase 1	Sgpl1	-0.0984957	0.264307	0.121109	0.35366	78	2.73507	0.961846	8.65952e-05	0.00528614	0.47662	2.48949	2.75933	2.95639
PG0183	A0A0N4SVB8;Q9DAB3;Q9CQW2	ADP-ribosylation factor-like protein 8B	Arl8b	-0.479629	-0.044066	0.608481	0.00861216	79	3.05295	0.980015	8.67158e-05	0.00528614	0.477284	2.77444	3.43984	2.94458
PG2728	P59708	Splicing factor 3B subunit 6	Sf3b6	-0.0670025	-0.230784	0.122175	-0.252653	80	2.52497	0.948765	8.86297e-05	0.00528614	0.487818	2.58963	2.6174	2.36789
PG2384	Q7TMQ1;P23242	Gap junction protein;Gap junction alpha-1 protein	Gja1	0.128972	0.34519	-0.161572	0.433791	81	2.87492	0.972384	8.86607e-05	0.00528614	0.487988	2.70993	2.70221	3.21262
PG4764	Q8BVG4;Q8BVG4-2	Dipeptidyl peptidase 9	Dpp9	0.00168043	-0.0840174	0.0271053	-0.0792623	82	2.41789	0.94186	8.91441e-05	0.00528614	0.490649	2.43461	2.42778	2.39129
PG2427	Q3UXV2;Q3TXH3;Q3TX90;Q3TP83;Q3TLP7;P28301;Q3TWI1	Protein-lysine 6-oxidase	Lox	0.10485	-0.48433	-0.0664061	-0.575827	83	-2.9212	0.00763081	9.04927e-05	0.00528614	0.498072	-2.60978	-2.91827	-3.23553
PG5254	Q8VEH3;F6QKK2	ADP-ribosylation factor-like protein 8A	Arl8a	0.157506	0.0664485	-0.174092	0.0915507	84	2.50009	0.947493	9.22718e-05	0.00528614	0.507864	2.51586	2.35712	2.62728
PG3427	Q3TW27;Q922L6	Negative elongation factor D	Nelfcd	0.0834037	0.0396981	-0.0819713	0.0649575	85	2.43384	0.942224	9.26898e-05	0.00528614	0.510165	2.4236	2.35512	2.52281
PG5105	Q8R0F8	Acylpyruvase FAHD1, mitochondrial	Fahd1	-0.144873	-0.227132	0.216458	-0.241865	86	2.54232	0.950036	9.29567e-05	0.00528614	0.511634	2.56087	2.69627	2.36982
PG2529	Q6GU23;Q3ULI4;Q3U5Q4;P42227-2;P42227-3;P42227;B7ZC18;Q3U6S9	Signal transducer and activator of transcription;Signal transducer and activator of transcription 3	Stat3	0.0160001	0.0380338	2.22508e-05	0.0684112	87	-2.41067	0.0203488	9.35947e-05	0.00528614	0.515145	-2.45797	-2.43523	-2.33881
PG5439	Q924Z4;D3Z4M2;D3YTM0;D3Z0Z2	Ceramide synthase 2	Cers2	0.465021	-0.0670793	-0.536965	-0.0962996	88	2.93641	0.975291	9.40131e-05	0.00528614	0.517448	3.20461	2.57293	3.03169
PG4612	Q8BH97;A0A1B0GR19;A0A1B0GR86;A0A1B0GSK5	Reticulocalbin-3	Rcn3	0.160385	0.136356	-0.18314	0.176567	89	-2.54425	0.0172602	9.48617e-05	0.00528614	0.522119	-2.56815	-2.70269	-2.36191
PG4185	Q63810-2;Q63810	Calcineurin subunit B type 1	Ppp3r1	-0.103361	-0.0983025	0.155811	-0.0881376	90	2.41499	0.941497	9.5931e-05	0.00528614	0.528004	2.38086	2.51149	2.35261
PG2346	Q3UCD9;Q3U7P0;Q3TWR6;Q3TWD0;P18242;Q3U7I9;F8WIR1;Q3UC89;Q3UAQ1;Q3U8W5;Q3TJN3;Q3UCW4;Q3TIR0;Q3TXL5;Q8C243;Q3U651;Q3TWL1;Q8VCK2;F6Y6L6;A0A1B0GT66	Cathepsin D	Ctsd	0.0386436	-0.219173	-0.00705395	-0.247089	91	2.44603	0.943314	9.76295e-05	0.00528614	0.537353	2.56344	2.45186	2.32277
PG1942	K3W4R2;Q6URW6-2;Q6URW6;Q6URW6-3;A0A140LI60	Myosin-14	Myh14	-0.313796	-0.454713	0.439687	-0.505652	92	3.02715	0.979288	9.79168e-05	0.00528614	0.538934	3.08481	3.35896	2.63769
PG2328	Q3UJ34;P16460;Q3UEJ7;J3QNG0	Argininosuccinate synthase	Ass1;Gm5424	0.281177	-0.0936606	-0.311576	-0.113759	93	-2.56809	0.0163517	9.93442e-05	0.00528614	0.54679	-2.38794	-2.77968	-2.53665
PG3095	Q3TW01;Q0PD23;Q9CZE3	Ras-related protein Rab-32	Rab32	0.329783	-0.133194	-0.367469	-0.165923	94	-2.64976	0.0141715	0.000100387	0.00528614	0.552531	-2.41882	-2.89273	-2.63772
PG0873	B2RRE8;Q9JLQ0	CD2-associated protein	Cd2ap	-0.122502	-0.521121	0.212634	-0.602197	95	2.93997	0.975472	0.000100959	0.00528614	0.555676	3.14482	3.13147	2.54364
PG2560	Q3U9R7;Q3UB84;Q3UAS7;P47791-2;P47791;Q3TXK9;Q3TWI5;Q91Z57	Glutathione reductase, mitochondrial	Gsr	-0.223188	0.226941	0.275515	0.318237	96	2.68313	0.959666	0.000102092	0.00528614	0.561915	2.38925	2.81405	2.84608
PG2251	P09041	Phosphoglycerate kinase 2	Pgk2	0.471505	0.468917	-0.587402	0.556807	97	-3.44507	0.00218023	0.000103269	0.00528614	0.56839	-3.48984	-3.91476	-2.93061
PG2813	P62631	Elongation factor 1-alpha 2	Eef1a2	-0.0999986	0.314187	0.118973	0.41461	98	-2.70979	0.012718	0.000103279	0.00528614	0.56845	-2.98568	-2.69373	-2.44996
PG0412	A0A1B0GT40;Q9D6Y7-4;Q9D6Y7-2;Q9D6Y7;Q9D6Y7-3	Mitochondrial peptide methionine sulfoxide reductase	Msra	0.0925342	-0.0761802	-0.0838586	-0.0770961	99	2.3537	0.936228	0.000103851	0.00528614	0.571597	2.41706	2.28952	2.35451
PG1418	E9PX70;Q60847-2;Q60847-5;Q60847;Q60847-4;Q60847-3	Collagen alpha-1(XII) chain	Col12a1	-0.291883	-0.324778	0.402755	-0.348982	100	-2.74911	0.0110828	0.000104834	0.00528614	0.577006	-2.75585	-2.45931	-3.03218
PG4970	Q8CI33;Q8CI33-2	CWF19-like protein 1	Cwf19l1	-0.0891156	0.213473	0.113754	0.290907	101	2.53645	0.949673	0.000105044	0.00528614	0.578163	2.32619	2.5628	2.72036
PG2488	Q3TR40;Q8CGB2;Q80YQ1;P35441	Thrombospondin-1	Thbs1	-0.387022	-0.0393217	0.495634	0.00686407	102	-2.724	0.0119913	0.000106048	0.00528614	0.583689	-2.95305	-2.412	-2.80696
PG5335	Q91WN1;Q8BRQ6	DnaJ homolog subfamily C member 9	Dnajc9	-0.0227574	0.408732	0.0176567	0.523622	103	2.8439	0.969658	0.000107053	0.00528614	0.589219	2.55575	2.78043	3.19552
PG2443	Q8K0X1;Q3UPN1;Q3TR98;P29533;Q91X98;Q544V4;P29533-2	Vascular cell adhesion protein 1	Vcam1	0.236302	-0.270519	-0.243032	-0.325783	104	-2.57863	0.0154433	0.000107715	0.00528614	0.592862	-2.31933	-2.72103	-2.69553
PG0176	Q8BN64;A0A0N4SUV6;Q3UGH6;Q3TAF0;Q9JHW4;A0A0N4SVA4;Q499X6	Selenocysteine-specific elongation factor	Eefsec	0.178631	0.206604	-0.210878	0.260748	105	-2.56337	0.0165334	0.000108117	0.00528614	0.595075	-2.61847	-2.74963	-2.32201
PG2581	P48771	Cytochrome c oxidase subunit 7A2, mitochondrial	Cox7a2	-0.204047	-0.626294	0.320021	-0.72382	106	3.18091	0.983467	0.00010863	0.00528614	0.5979	3.40186	3.45738	2.68349
PG3930	Q52KP0;Q9JJI8	60S ribosomal protein L38	Rpl38	-0.306791	0.17282	0.381348	0.259039	107	2.68579	0.960029	0.000109459	0.00528614	0.602464	2.3767	2.89371	2.78696
PG3196	Q3TCD4;Q9WUR2-2;Q9WUR2;E9PUY9;E9PYA9;E9PVM6;E9PYC6;E9Q858	Enoyl-CoA delta isomerase 2, mitochondrial	Eci2	-0.109155	0.0442658	0.151528	0.0861924	108	2.35786	0.936773	0.000110819	0.00528614	0.609948	2.23625	2.43211	2.40521
PG4650	Q8BJL1	F-box only protein 30	Fbxo30	0.167249	-0.368422	-0.151393	-0.439555	109	2.6166	0.955305	0.000111926	0.00528614	0.616041	2.89476	2.54783	2.40722
PG5194	Q8VCG1;Q9CQ43;Q9JJ44		Dut	0.178069	-0.0821079	-0.187269	-0.091283	110	-2.37232	0.0225291	0.000112383	0.00528614	0.618555	-2.25718	-2.50371	-2.35606
PG0928	B2RUR3;P06795	Multidrug resistance protein 1B	Abcb1b	0.212348	-0.187186	-0.220557	-0.222212	111	-2.4488	0.0194404	0.000113089	0.00528614	0.62244	-2.25225	-2.58777	-2.50639
PG4410	Q78IS1	Transmembrane emp24 domain-containing protein 3	Tmed3	0.0893916	0.221403	-0.103672	0.286055	112	2.49716	0.947311	0.000113348	0.00528614	0.623869	2.38295	2.3794	2.72911
PG0081	E9QKR1;A0A0A6YW06;J3QNM3;E9QKQ9;E9QLZ9;Q03173-6;Q03173-3;Q03173-4;Q03173-5;Q03173;A0A0A6YXC8	Protein enabled homolog	Enah	0.211667	-0.079675	-0.228267	-0.0910493	113	-2.39981	0.0207122	0.000113625	0.00528614	0.625392	-2.26715	-2.5585	-2.37377
PG5564	Q9CPT4	Myeloid-derived growth factor	Mydgf	0.739094	-0.222103	-0.857515	-0.307643	114	3.51912	0.993278	0.000114434	0.00528614	0.629846	4.03357	2.9659	3.55789
PG2755	Q14AC7;P61211;F8WIB1;Q9D7H9;Q3TIR2	ADP-ribosylation factor-like protein 1	Arl1	0.523101	-0.0426221	-0.609444	-0.0711995	115	2.93073	0.974927	0.000114463	0.00528614	0.630002	3.21726	2.51625	3.05869
PG2026	Q543M7;O35344;Q9CT07	Importin subunit alpha;Importin subunit alpha-4	Kpna3	-0.453654	0.0623541	0.568484	0.136276	116	2.8353	0.969113	0.00011462	0.00528614	0.630871	2.50859	3.18138	2.81595
PG3207	Q3UD03;Q3U199;Q3TCV9;Q6NSR8;F6T2H5;Q3UMV8	Probable aminopeptidase NPEPL1	Npepl1	-0.126929	-0.383062	0.207047	-0.433477	117	2.60162	0.954215	0.000115281	0.00528614	0.634507	2.72241	2.77062	2.31182
PG5355	Q91XV3	Brain acid soluble protein 1	Basp1	0.226235	0.254417	-0.27249	0.315182	118	2.63553	0.956759	0.000115406	0.00528614	0.635194	2.57905	2.40222	2.92531
PG5879	Q9D6K8	FUN14 domain-containing protein 2	Fundc2	-0.327474	-0.101	0.42821	-0.0731952	119	2.56957	0.95258	0.00011589	0.00528614	0.637858	2.41056	2.84563	2.45253
PG4551	Q810S1;F6SD17	Calcium uniporter regulatory subunit MCUb, mitochondrial	Ccdc109b	0.318772	-0.000637139	-0.364622	-0.00337764	120	2.5302	0.948946	0.000116961	0.00528614	0.643754	2.67662	2.27105	2.64295
PG5078	Q8K3X4	Interferon regulatory factor 2-binding protein-like	Irf2bpl	0.043991	0.0638257	-0.0360207	0.0975868	121	2.30469	0.932231	0.000117502	0.00528614	0.646734	2.25795	2.25291	2.40321
PG5095	Q8QZY9	Splicing factor 3B subunit 4	Sf3b4	0.260354	-0.433298	-0.259317	-0.526245	122	2.7701	0.965116	0.000119627	0.00528614	0.658428	3.13913	2.63917	2.532
PG4609	Q8BH80;Q9QY76;Q3TU78;Q3TA54	Vesicle-associated membrane protein-associated protein B	Vapb	-0.29615	-0.380836	0.412389	-0.416996	123	2.74711	0.963844	0.000119867	0.00528614	0.65975	2.77108	3.05089	2.41936
PG1917	Z4YKT6;I7DM66;Q99J47-2;Q99J47	Dehydrogenase/reductase SDR family member 7B	Dhrs7b	-0.186014	0.00318413	0.248135	0.0423468	124	2.361	0.936955	0.000120134	0.00528614	0.661215	2.22028	2.5044	2.35831
PG6295	Q9Z2I0	LETM1 and EF-hand domain-containing protein 1, mitochondrial	Letm1	0.308152	-0.181238	-0.337383	-0.222752	125	2.53071	0.949128	0.000120616	0.00528614	0.663871	2.77782	2.31408	2.50024
PG3898	Q4QQP1;Q9CZG3;A0A0G2JH18	COMM domain-containing protein 8	Commd8	0.135144	-0.113811	-0.13262	-0.126452	126	2.30525	0.932413	0.000121013	0.00528614	0.666054	2.41489	2.21413	2.28674
PG2238	Q3U4F9;Q3TLQ6;Q3TDK0;P07141;D3Z090;F6RNW8;P07141-2	Macrophage colony-stimulating factor 1;Processed macrophage colony-stimulating factor 1	Csf1	0.101287	-0.0986038	-0.0927084	-0.105153	127	-2.25941	0.0268895	0.000125923	0.00539808	0.69308	-2.17787	-2.32635	-2.27402
PG4817	Q8C0T5;Q4VBF8;Q8C0T5-2	Signal-induced proliferation-associated 1-like protein 1	Sipa1l1	-0.00725631	-0.100665	0.0392809	-0.0988367	128	2.22915	0.924782	0.00012761	0.00539808	0.702364	2.25066	2.24932	2.18748
PG3122	Q14AZ9;Q8BGC4	Zinc-binding alcohol dehydrogenase domain-containing protein 2	Zadh2	0.152346	-0.0865958	-0.155673	-0.0946633	129	2.28178	0.930414	0.000127819	0.00539808	0.703514	2.38505	2.17178	2.28851
PG5637	Q9CQU5	ZW10 interactor	Zwint	-0.0474233	-0.586233	0.126621	-0.687708	130	2.88834	0.973292	0.000128293	0.00539808	0.706124	3.17402	3.03213	2.45888
PG0587	A2AJH3;Q3THR4;O70311;F7APP3	Glycylpeptide N-tetradecanoyltransferase;Glycylpeptide N-tetradecanoyltransferase 2	Nmt2	0.164802	0.0535862	-0.181931	0.0752719	131	2.3066	0.932594	0.000130279	0.00539808	0.717056	2.33409	2.16023	2.42548
PG0830	B1AY85;Q9DC11;B1AY86	Plexin domain-containing protein 2	Plxdc2	-0.307855	0.0682416	0.390944	0.131595	132	-2.49696	0.0183503	0.000130516	0.00539808	0.718361	-2.74488	-2.26848	-2.47753
PG3438	Q3TWW5;Q61048	WW domain-binding protein 4	Wbp4	0.00366468	-0.0109771	0.0188954	0.00964708	133	2.2127	0.922602	0.000131075	0.00539808	0.721436	2.18739	2.20724	2.24347
PG4862	Q8C5H8-2;Q8C5H8-3;Q8C5H8;Q9CUB4;Q14BL1;Z4YK42;Q8C5H8-4	NAD kinase 2, mitochondrial	Nadk2	-0.0764363	0.166299	0.102101	0.232347	134	-2.34645	0.0236192	0.000131421	0.00539808	0.723343	-2.52169	-2.32134	-2.19633
PG3579	Q3U7R1;Q3U7R1-2	Extended synaptotagmin-1	Esyt1	-0.00948833	0.13414	0.0233463	0.187683	135	2.28063	0.930051	0.000135506	0.00542224	0.745823	2.16217	2.25832	2.42139
PG0959	B2RXQ8;Q8BFQ4	WD repeat-containing protein 82	Wdr82	-0.430362	-0.321958	0.570713	-0.334278	136	2.78725	0.966751	0.000140022	0.00542224	0.770681	2.7007	3.18716	2.4739
PG0915	B2RUA6;Q8BSA9;E9PYE2	tRNA wybutosine-synthesizing protein 3 homolog	Tyw3	0.230261	0.0953751	-0.26475	0.120907	137	2.35373	0.93641	0.000140793	0.00542224	0.774927	2.39347	2.14718	2.52053
PG0689	Q8C1Z9;F6V6T4;A2RS53;Q9R0Q3;Q3THL1;Q3U9H7;Q8BPI2	Transmembrane emp24 domain-containing protein 2	Tmed2	-0.264512	-0.105229	0.35208	-0.0834742	138	2.36441	0.937863	0.000141184	0.00542224	0.777079	2.24343	2.59096	2.25883
PG1223	D3YZ20;Q6PI63;O08740;D3YZ19;Q3TYI2	DNA-directed RNA polymerase II subunit RPB11	Polr2j	0.379768	0.126832	-0.448824	0.147105	139	2.58303	0.953307	0.000141471	0.00542224	0.778658	2.68857	2.25111	2.80941
PG3102	Q0VBK8;Q64261;Q3U4J9	Cyclin-dependent kinase 6	Cdk6	0.0561111	0.0268962	-0.047808	0.0515661	140	-2.18674	0.0296148	0.000142925	0.00542224	0.786661	-2.20483	-2.24125	-2.11416
PG4914	Q8CD10	Calcium uptake protein 2, mitochondrial	Micu2	-0.228179	-0.0210196	0.301266	0.0162611	141	2.30412	0.932049	0.000143896	0.00542224	0.792002	2.1539	2.48577	2.27268
PG4624	Q8BHL3	TBC1 domain family member 10B	Tbc1d10b	-0.0230602	-0.205105	0.066768	-0.224913	142	-2.21775	0.028343	0.000145578	0.00542224	0.801262	-2.14346	-2.16527	-2.34451
PG6212	Q9R1B9;G3UY21;A0A140T8T2;G3UYX7;B2RX05;Q5DTL5;B7ZNW9;G3X909	Slit homolog 2 protein;Slit homolog 2 protein N-product;Slit homolog 2 protein C-product	Slit2	0.296513	-0.28462	-0.315039	-0.347877	143	-2.48834	0.0187137	0.000146447	0.00542224	0.806046	-2.18674	-2.67619	-2.60211
PG4596	Q8BGX0-3;Q8BGX0-2;Q8BGX0	E3 ubiquitin-protein ligase TRIM23	Trim23	-0.0386976	-0.255621	0.0897709	-0.285244	144	2.26086	0.927871	0.000146915	0.00542224	0.808618	2.35616	2.33536	2.09107
PG0619	Q80YU9;A2AN96;O88851	Putative hydrolase RBBP9	Rbbp9	-0.0127288	-0.368039	0.0671587	-0.424448	145	2.39485	0.940225	0.000147323	0.00542224	0.810866	2.57121	2.46979	2.14355
PG1531	E9Q634	Unconventional myosin-Ie	Myo1e	-0.155588	-0.0201345	0.213034	0.0114352	146	2.20602	0.922238	0.000151251	0.00542224	0.832485	2.09624	2.32951	2.1923
PG2544	Q3TND1;P45878;Q3UND3	Peptidyl-prolyl cis-trans isomerase;Peptidyl-prolyl cis-trans isomerase FKBP2	Fkbp2	0.374502	-0.0179218	-0.430934	-0.0289895	147	2.4623	0.944222	0.000152665	0.00542224	0.840266	2.65037	2.16187	2.57465
PG4796	Q8BYK6;Q8BYK6-3;Q7TN20;Q8BYK6-2;Q8BVC6	YTH domain-containing family protein 3	Ythdf3	0.265059	-0.439239	-0.26456	-0.533873	148	2.63094	0.956395	0.000152976	0.00542224	0.841983	3.00613	2.49737	2.38932
PG0388	A0A158SIT3;Q9WV03;Q05AF0	Protein FAM50A	Fam50a	-0.130147	-0.237437	0.199392	-0.25563	149	2.26231	0.928234	0.000153321	0.00542224	0.84388	2.29525	2.40643	2.08523
PG4196	Q64364;A7LP29;Q64364-2	Tumor suppressor ARF	Cdkn2a	0.076322	0.265544	-0.0913045	0.340947	150	-2.38154	0.0221657	0.000153834	0.00542224	0.846702	-2.52919	-2.49717	-2.11825
PG3540	Q3U489;Q3UYL0;Q9WUR9;F6TEU8	Adenylate kinase 4, mitochondrial	Ak4	0.213496	-0.23487	-0.218164	-0.280455	151	-2.31626	0.0243459	0.000154074	0.00542224	0.848022	-2.09089	-2.44716	-2.41073
PG4085	Q5XK33;Q9CZB0;F8WGB3	Succinate dehydrogenase cytochrome b560 subunit, mitochondrial	Sdhc	0.504515	-0.72127	-0.532983	-0.897282	152	3.48252	0.992369	0.000154522	0.00542224	0.850487	4.15945	3.21081	3.0773
PG0064	A0A0A0MQ99;V9GXX7;Q8K3D3-2;E3WH32;Q8K3D3	DNA repair protein SWI5 homolog	Swi5	0.240559	-0.0816706	-0.263198	-0.0958333	153	2.26258	0.928416	0.000155517	0.00542224	0.855967	2.41272	2.08118	2.29384
PG5819	Q9D172	ES1 protein homolog, mitochondrial	D10Jhu81e	0.226692	0.072871	-0.258628	0.0937545	154	2.27911	0.929688	0.00015629	0.00542224	0.86022	2.33013	2.07966	2.42753
PG6271	Q9Z179	SHC SH2 domain-binding protein 1	Shcbp1	-0.108169	0.484977	0.115334	0.623549	155	2.77699	0.965843	0.000157468	0.00542224	0.866704	2.39559	2.76738	3.16799
PG3516	Q3U3B9;Q9D5V6;Q3TTE4	Synapse-associated protein 1	Syap1	0.403056	-0.045133	-0.463452	-0.0644958	156	2.48658	0.945676	0.000158618	0.00542224	0.873033	2.70684	2.16847	2.58442
PG4365	Q6YIY0;G4V4Z2;G4V4Z1;A0A140DKP8;Q1KYL8;P11269;P03336;A0A068EWW2;A0A068F126;Q1KYL9;P70355;A0A068ETZ5		gag;gag-pro-pol;gag-pol	0.153116	0.179375	-0.177728	0.229619	157	2.29504	0.931504	0.000158684	0.00542224	0.873398	2.24163	2.13429	2.5092
PG2278	P11087;P11087-2	Collagen alpha-1(I) chain	Col1a1	0.13797	0.110725	-0.153882	0.147134	158	-2.21627	0.0285247	0.000160126	0.00542224	0.881334	-2.23768	-2.35197	-2.05916
PG0654	A2ATN9;Q9ES70	Serine/threonine-protein kinase Nek6	Nek6	0.0961749	-0.278065	-0.0722489	-0.323586	159	-2.24877	0.0272529	0.000161677	0.00542224	0.88987	-2.0641	-2.2778	-2.40442
PG0229	A0A0R4J097;O88393;Q3TM82	Transforming growth factor beta receptor type 3	Tgfbr3	0.468621	-0.18896	-0.531659	-0.245223	160	-2.62976	0.0147166	0.000162851	0.00542224	0.896334	-2.28754	-2.97314	-2.62861
PG6189	Q9QZL0;E9PZP3	Receptor-interacting serine/threonine-protein kinase 3	Ripk3	-0.269204	0.000644006	0.34937	0.0460167	161	-2.29233	0.0256177	0.000162977	0.00542224	0.897027	-2.4785	-2.08198	-2.3165
PG5930	Q9D937;Q9CSS6;A0A087WQJ5;A0A087WRC2	Uncharacterized protein C11orf98 homolog	1810009A15Rik;Ints5	-0.230896	0.401295	0.271031	0.531484	162	2.67951	0.959121	0.000162987	0.00542224	0.897083	2.27829	2.78373	2.97652
PG5675	Q9CRC9;D3YWR1;Q9CRC9-2;Q571B4	Glucosamine-6-phosphate isomerase 2;Glucosamine-6-phosphate isomerase	Gnpda2	0.309654	0.110647	-0.362385	0.133073	163	2.37248	0.938953	0.000165998	0.00542224	0.913651	2.44801	2.09963	2.5698
PG6051	Q9EQQ9;Q9EQQ9-3;Q05CX1	Protein O-GlcNAcase	Mgea5	-0.357357	-0.398571	0.488133	-0.433645	164	2.65334	0.958212	0.000166441	0.00542224	0.916092	2.65325	3.00936	2.29741
PG0472	A0PJ63;G5E8V8;Q9JJT9;F6RPD4	Phosphorylated adapter RNA export protein	Phax	-0.0547255	0.117085	0.0796409	0.170565	165	2.1681	0.917333	0.000166461	0.00542224	0.916199	2.03419	2.18515	2.28497
PG3339	Q3TLP5;Q3TLP5-2;F6YTG0;Q3TLP5-3;F6Z5N5;Q8R3H3	Enoyl-CoA hydratase domain-containing protein 2, mitochondrial	Echdc2	-0.0880039	-0.128431	0.139553	-0.126127	166	-2.12332	0.0319767	0.000167491	0.00542224	0.921868	-2.13098	-2.03341	-2.20557
PG2824	Q3TU26;Q542T7;P62823;Q9CXS2	Ras-related protein Rab-3C	Rab3c	-0.319452	0.312492	0.385634	0.430396	167	2.6155	0.955124	0.000168684	0.00542224	0.928436	2.21676	2.80721	2.82254
PG2896	Q3UGN9;Q3TQ49;Q3UMC8;P70297;A2ARJ0	Signal transducing adapter molecule 1	Stam	0.0935265	-0.0574502	-0.086551	-0.0543359	168	2.09611	0.907885	0.00017072	0.00542224	0.939643	2.14897	2.02762	2.11175
PG4054	Q5SUF2;Q5SUF2-3;Q5SUF2-2	Luc7-like protein 3	Luc7l3	-0.351643	-0.386361	0.480223	-0.419221	169	2.61254	0.954942	0.000170846	0.00542224	0.940337	2.60846	2.9617	2.26747
PG3247	Q3TFQ1;Q3UBW1	SPRY domain-containing protein 7	Spryd7	-0.122451	-0.083676	0.177835	-0.0687479	170	2.11906	0.911701	0.00017142	0.00542224	0.943493	2.06553	2.22806	2.06361
PG5651	Q9CQZ5	NADH dehydrogenase [ubiquinone] 1 alpha subcomplex subunit 6	Ndufa6	0.550154	0.0717195	-0.65138	0.0660365	171	2.74904	0.964026	0.000172399	0.00542224	0.948885	2.98329	2.29139	2.97244
PG5058	Q8K2Q7	BRO1 domain-containing protein BROX	Brox	0.69809	-0.226287	-0.807383	-0.309409	172	3.10028	0.981468	0.000173406	0.00542224	0.954428	3.59406	2.58061	3.12617
PG4997	Q8K009;D3Z6B9	Mitochondrial 10-formyltetrahydrofolate dehydrogenase	Aldh1l2	-0.180318	0.125332	0.231518	0.19084	173	2.22345	0.923692	0.000175187	0.00542224	0.964227	2.01379	2.33928	2.31728
PG2224	V6AW78;P04918	Serum amyloid A-3 protein	Saa3	0.568071	-0.244674	-0.648017	-0.321255	174	-2.81321	0.00962936	0.000176196	0.00542224	0.969786	-2.38194	-3.22553	-2.83214
PG6196	Q9R059;F2Z455	Four and a half LIM domains protein 3	Fhl3	0.26207	-0.242641	-0.27654	-0.293883	175	2.30093	0.931686	0.000176879	0.00542224	0.973541	2.55831	2.13269	2.2118
PG3066	Q05BC3-2;Q05BC3;D3Z4J9;B9EKL9;Q05BC3-3;D6RII3	Echinoderm microtubule-associated protein-like 1	Eml1	-0.141485	0.0442172	0.190796	0.0887632	176	2.135	0.913517	0.000177203	0.00542224	0.975323	1.99517	2.2351	2.17474
PG0925	B2RUK5;Q3ULD5;Q6PD20	Methylcrotonoyl-CoA carboxylase beta chain, mitochondrial	Mccc2	0.0759464	0.115227	-0.0789119	0.157669	177	-2.13666	0.0316134	0.000177678	0.00542224	0.97794	-2.19572	-2.22366	-1.99059
PG2625	Q3TQK8;P52019;Q3TSS7	Squalene monooxygenase	Sqle	0.221318	-0.0785633	-0.240077	-0.0904788	178	2.17122	0.917878	0.000178151	0.00542224	0.980541	2.30867	2.00461	2.20038
PG5554	Q9CPN8	Insulin-like growth factor 2 mRNA-binding protein 3	Igf2bp3	-0.226416	-0.0108673	0.298319	0.0284982	179	-2.19183	0.0292515	0.00017826	0.00542224	0.981144	-2.34705	-2.0135	-2.21494
PG3660	Q9ESU7;Q3UFR4;Q5U647	Amino acid transporter	Slc1a5	0.0757323	-0.186695	-0.054677	-0.2105	180	-2.11169	0.0323401	0.000178572	0.00542224	0.982858	-1.99253	-2.14161	-2.20094
PG2383	Q9DCC5;Q32P00;P23198;I6L9I7	Chromobox protein homolog 3	Cbx3	-0.246064	0.129823	0.311009	0.201665	181	2.28214	0.930596	0.000179042	0.00542224	0.985446	2.03272	2.44965	2.36405
PG1449	E9PZB3		Gm5093	-0.355406	0.267876	0.432843	0.378912	182	2.56822	0.951853	0.000179316	0.00542224	0.986957	2.17554	2.79706	2.73206
PG5296	Q91VJ2	Protein kinase C delta-binding protein	Prkcdbp	-0.0661448	-0.0542274	0.107113	-0.0374165	183	2.0631	0.904797	0.000180526	0.00542224	0.993615	2.02394	2.12156	2.0438
PG1050	C9K0Z4;Q03391	Glutamate receptor ionotropic, NMDA 2D	Grin2d	-3.41607	-0.873581			184	-4.33383	0.000363372	0.000181386	0.00542224	0.998347	-4.3349		-4.33276
PG5410	Q921Y0;Q3T9U1;Q3UDM0;Q8BPB0;Q921Y0-2	MOB kinase activator 1A;MOB kinase activator 1B	Mob1a;Mob1b	-0.562027	-0.0756949	0.711064	-0.0232554	185	2.73432	0.961664	0.000183362	0.00542224	1	2.42799	3.19299	2.58197
PG1287	D3Z645;Q9QZ88;Q9QZ88-2;D3YYD5	Vacuolar protein sorting-associated protein 29	Vps29	-0.599616	-0.353769	0.778798	-0.359302	186	2.97216	0.976926	0.000183512	0.00542224	1	2.80888	3.51328	2.59431
PG1432	E9PYB0		Ahnak2	0.0270526	-0.107362	-0.00185538	-0.109795	187	2.04675	0.90298	0.000185105	0.00542224	1	2.09158	2.04077	2.00791
PG0436	Q4FCQ7;A0A1L1SQ41;Q9Z2A5;Q4FCQ6;J3QNU1;Q80YP1;Q9Z2A5-2;Q8BP95	Arginyl-tRNA--protein transferase 1	Ate1	0.169215	-0.469657	-0.145742	-0.56317	188	2.47689	0.945131	0.000187213	0.00542224	1	2.81596	2.42563	2.18908
PG5961	Q9DBB4;E9PZ53	N-alpha-acetyltransferase 16, NatA auxiliary subunit	Naa16	0.332034	0.0590953	-0.385472	0.0683857	189	2.30718	0.932958	0.000187371	0.00542224	1	2.42579	2.02617	2.46958
PG0122	E9QKG6;A0A0G2JDZ9;E9Q804;Q99NH0;Q99NH0-2;Q99NH0-3	Ankyrin repeat domain-containing protein 17	Ankrd17	-0.0896329	-0.0594338	0.136053	-0.0418549	190	-2.05335	0.0357922	0.000188087	0.00542224	1	-2.10269	-1.97514	-2.08222
PG0395	A0A172Q382;Q91ZV8;J3QPB6	G-protein coupled receptor 124	Gpr124;Adgra2	-0.127802	0.0491378	0.173788	0.0936506	191	2.09523	0.907703	0.00018937	0.00542224	1	1.96022	2.18347	2.14201
PG5059	Q8K2T8	RNA polymerase II-associated factor 1 homolog	Paf1	0.0614667	0.26319	-0.0730758	0.339285	192	2.26028	0.927689	0.00018987	0.00542224	1	2.10563	2.15695	2.51825
PG0188	A0A0N4SVT3;A0A0N4SW28;Q9DAS9	Guanine nucleotide-binding protein G(I)/G(S)/G(O) subunit gamma-12	Gng12	0.0173523	-0.284672	0.0240054	-0.325231	193	-2.15388	0.0310683	0.000190133	0.00542224	1	-2.00979	-2.11869	-2.33316
PG4115	Q60I30;Q9D892;Q3U589	Inosine triphosphate pyrophosphatase	Itpa	-0.0414455	0.384451	0.0422815	0.495532	194	2.43991	0.942951	0.000192885	0.00546652	1	2.15555	2.39594	2.76822
PG6204	Q9R0P3;H3BK43;H3BLJ9;H3BJL6;H3BKH6;H3BJP2	S-formylglutathione hydrolase	Esd	-0.130612	-0.192101	0.196356	-0.200306	195	2.10445	0.910247	0.000195384	0.00546652	1	2.11036	2.24041	1.9626
PG3073	Q8BM29;Q05DT0;Q8BJH2;Q3UNK1;Q9QYB5-2;Q05C56;Q9QYB5;Q9JLE2	Gamma-adducin	Add3	-0.00399497	-0.15325	0.0394956	-0.163228	196	2.03407	0.901163	0.000196883	0.00546652	1	2.08848	2.06154	1.95218
PG3490	Q3UPB9;Q3U1H7;Q8C788;Q91ZR2	Sorting nexin;Sorting nexin-18	Snx18	-0.154785	-0.156866	0.222916	-0.155371	197	-2.09017	0.0334302	0.000199915	0.00546652	1	-2.11872	-1.94155	-2.21024
PG2232	Q52L79;Q3US19;P05627;Q3V255	Transcription factor AP-1	Jun	0.314563	-0.0681856	-0.354146	-0.0854089	198	2.22232	0.92351	0.000200166	0.00546652	1	2.40626	1.97926	2.28144
PG4056	Q5SUR3;Q9WTX5;Q3TL58	S-phase kinase-associated protein 1	Skp1a;Skp1	0.678794	-0.872011	-0.732673	-1.09528	199	3.85797	0.99782	0.000200892	0.00546652	1	4.7223	3.47544	3.37617
PG0083	A0A0A6YWR8;Q6ZQ68;E9PVG7;B7ZNR8;A0A0A6YW53;P97820;B7ZNR9;B2RUE8;F8VPL5;A0A0A6YWM8	Mitogen-activated protein kinase kinase kinase kinase 4	Map4k4;mKIAA0687	0.169668	-0.268041	-0.162301	-0.31734	200	-2.16966	0.0301599	0.000201098	0.00546652	1	-1.94943	-2.25929	-2.30025
PG4541	Q80ZM5		H1fx	0.0616169	-0.782343	0.00976522	-0.935729	201	3.02198	0.978743	0.000201914	0.00546652	1	3.48504	3.11562	2.46529
PG0376	A0A140T8J4;Q9R257	Heme-binding protein 1	Hebp1	0.0572585	-0.00883789	-0.0463639	0.00789596	202	2.00723	0.897166	0.000202132	0.00546652	1	2.0109	1.95855	2.05224
PG2497	Q3UWG5;P35762;A0A140LJL0	Tetraspanin;CD81 antigen	Cd81	-0.269619	0.855487	0.281993	1.08851	203	3.54756	0.993641	0.000202403	0.00546652	1	2.85618	3.59709	4.18939
PG2265	P10493	Nidogen-1	Nid1	0.446044	0.00703386	-0.519802	-0.00437665	204	-2.42776	0.0199855	0.000202983	0.00546652	1	-2.21405	-2.79005	-2.27919
PG4874	Q8C7C3		Tpm3	0.338345	0.0808139	-0.394861	0.0943576	205	-2.28282	0.0259811	0.000203604	0.00546652	1	-2.17347	-2.57297	-2.10201
PG4204	Q64735-2;Q64735;A0A0A6YY75;A0A0A6YVT1;A0A0A6YXN9;Q62479	Complement component receptor 1-like protein	Cr1l	0.236922	-0.2752	-0.243414	-0.331542	206	2.22472	0.923874	0.000205248	0.0054839	1	2.48713	2.08271	2.10432
PG4597	Q8BGY7	Protein FAM210A	Fam210a	0.0178183	-0.446818	0.0363151	-0.523001	207	2.32848	0.93423	0.000207136	0.00549024	1	2.56861	2.39386	2.02295
PG0116	A0A0G2JFV3;A0A0G2JDE3;A0A0G2JG66;A0A0G2JDF4;A0A0G2JFF5;A0A0G2JDK6;A0A0G2JGM8;Q8JZZ7;Q8JZZ7-2;A0A0G2JEQ8;A0A0G2JH16	Latrophilin-2	Lphn2	-0.154125	-0.396186	0.241119	-0.44727	208	-2.30441	0.0252544	0.00020748	0.00549024	1	-2.19122	-2.1112	-2.61081
PG3334	Q3TLG2;Q9D0K8;Q5RL57;Q9R0L7;Q99LI6	A-kinase anchor protein 8-like	Akap8l	-0.524103	-0.362388	0.687772	-0.375956	209	2.74054	0.963118	0.000210706	0.00554893	1	2.62497	3.22295	2.37369
PG4949	Q9D2U9;Q8CGP0;Q64524	Histone H2B type 3-A;Histone H2B type 3-B;Histone H2B type 2-E	Hist3h2ba;Hist3h2bb;Hist2h2be	0.699134	-0.612979	-0.777946	-0.781056	210	-3.37733	0.00327035	0.000212951	0.00555566	1	-2.65454	-3.82494	-3.65252
PG5721	Q9CXR1	Dehydrogenase/reductase SDR family member 7	Dhrs7	0.234916	-0.16572	-0.249671	-0.197871	211	2.12371	0.912246	0.00021298	0.00555566	1	2.32031	1.96266	2.08815
PG3093	Q0P6I6;Q9D8L5	Coiled-coil domain-containing protein 91	Ccdc91	0.2545	-0.108984	-0.27796	-0.130275	212	2.11353	0.911337	0.000217172	0.00558531	1	2.28768	1.92615	2.12678
PG4330	Q6PD42	eukaryotic translation initiation factor 4, gamma 1	Eif4g1	-2.23919	2.58131			213	4.23359	0.999455	0.000217389	0.00558531	1		4.12014	4.34703
PG1773	G3UW40;Q3TYX4;E9PWI3		Mcc	-0.00701223	-0.180307	0.0453087	-0.195978	214	2.00138	0.896076	0.000217776	0.00558531	1	2.07008	2.03637	1.89771
PG4493	Q80UX3;F8WH20;D3Z194;D3YTT6;Q9DBS9;Q6A012	Oxysterol-binding protein;Oxysterol-binding protein-related protein 3	Osbpl3;mKIAA0704	0.132499	0.0141627	-0.13957	0.0298238	215	2.00902	0.897529	0.000218176	0.00558531	1	2.04157	1.89589	2.08961
PG3242	Q3TFD0;Q9CZN7;Q99K87	Serine hydroxymethyltransferase	Shmt2	0.06915	-0.109078	-0.0528463	-0.115312	216	1.97345	0.89226	0.00022061	0.00562148	1	2.04305	1.93416	1.94315
PG4605	Q8BH64;Q8R2X0	EH domain-containing protein 2	Ehd2	-0.127011	-0.0851339	0.183489	-0.0701548	217	-1.99397	0.0386991	0.000223953	0.00567659	1	-2.04922	-1.88106	-2.05163
PG0460	A0A1L1SUX8;Q53YX2;P01831	Thy-1 membrane glycoprotein	Thy1	-0.0055404	0.0082509	0.0285481	0.033844	218	1.95618	0.889717	0.000224836	0.00567659	1	1.91432	1.95445	1.99978
PG4710	Q8BP47	Asparagine--tRNA ligase, cytoplasmic	Nars	-0.0944572	-0.0543848	0.141511	-0.0353052	219	1.96408	0.89117	0.00022858	0.00572567	1	1.90904	2.04519	1.93801
PG1721	F8VQ05		Fryl	-0.124657	0.0932491	0.166465	0.147187	220	2.02689	0.900073	0.00022886	0.00572567	1	1.86759	2.10429	2.10878
PG6269	Q9Z130;F6VQH5;D3YTQ3	Heterogeneous nuclear ribonucleoprotein D-like	Hnrnpdl	-0.135142	0.499029	0.146977	0.642879	221	2.56875	0.952398	0.000234882	0.00581629	1	2.16383	2.57804	2.96437
PG4727	Q8BRV5;A0A1D5RLN6;A0A1B0GR85	Uncharacterized protein KIAA1671	Kiaa1671	-0.244294	0.869006	0.250162	1.10294	222	3.43958	0.991279	0.000235224	0.00581629	1	2.75451	3.46634	4.09789
PG1325	D9J2V6;Q71VB4;P41778-2;P41778;Q99LS8	Pre-B-cell leukemia transcription factor 1	Pbx1	0.0973356	0.184031	-0.110353	0.239834	223	-2.06853	0.0348837	0.000235653	0.00581629	1	-2.15617	-2.18559	-1.86383
PG4280	Q6P1E1-2;Q6P1E1	Zinc finger MIZ domain-containing protein 1	Zmiz1	0.330268	0.0924102	-0.385973	0.109156	224	2.19352	0.92024	0.000239441	0.00582262	1	2.29146	1.90764	2.38147
PG2437	Q922W6;Q3UFJ0;P28862	Stromelysin-1	Mmp3	0.60096	-0.0119555	-0.70644	-0.0401362	225	2.62319	0.955487	0.000239685	0.00582262	1	2.93554	2.14072	2.79331
PG1298	H7BWX9;D3Z794;P61957;G3UZX6;G3UZ60;G3UWI9;G3UWX9;G3UZA7;Q9Z172-2;Q9Z172	Small ubiquitin-related modifier 2;Small ubiquitin-related modifier;Small ubiquitin-related modifier 3	Sumo2;Sumo3	-0.179786	-0.835533	0.307171	-0.980955	226	3.07006	0.980923	0.000239705	0.00582262	1	3.42831	3.36659	2.41529
PG2801	P62315	Small nuclear ribonucleoprotein Sm D1	Snrpd1	0.128158	-0.247034	-0.113556	-0.288346	227	2.03413	0.901344	0.000241654	0.00582262	1	2.21852	1.9737	1.91016
PG0745	A6MDD3;Q8R422	CD109 antigen	Cd109	0.130525	-0.397639	-0.104471	-0.472198	228	2.20075	0.921875	0.000243572	0.00582262	1	2.47544	2.16682	1.95998
PG2679	P56376;Q4VAF0;E9QJT5	Acylphosphatase-1;Acylphosphatase	Acyp1	0.314044	0.0986653	-0.366766	0.118104	229	2.16739	0.917151	0.000243576	0.00582262	1	2.25248	1.89329	2.35641
PG2867	Q9CXY0;P63321	Ras-related protein Ral-A	Rala	-0.0449689	-0.523847	0.118687	-0.611829	230	2.37199	0.938772	0.000244365	0.00582262	1	2.62219	2.50205	1.99171
PG5093	Q8QZX2-2;Q8QZX2	HAUS augmin-like complex subunit 3	Haus3	-0.0404591	0.292508	0.0483845	0.383329	231	2.16653	0.916969	0.000245289	0.00582262	1	1.93704	2.13911	2.42344
PG1928	Q3UZI6;J3QK52;Q8BHX6;Q9WV70	Nucleolar complex protein 2 homolog	Noc2l	-0.293299	-0.149157	0.390529	-0.134702	232	2.12362	0.912064	0.000247152	0.00582262	1	2.01235	2.38145	1.97706
PG4050	Q5SS80;B0QZT2;Q5SS80-2	Dehydrogenase/reductase SDR family member 13	Dhrs13	-0.32205	0.00974807	0.412829	0.0614179	233	-2.14873	0.03125	0.000247392	0.00582262	1	-2.3701	-1.89789	-2.17821
PG0874	B2RRF0;P35822	Protein-tyrosine-phosphatase;Receptor-type tyrosine-protein phosphatase kappa	Ptprk	-0.2389	0.0989356	0.304761	0.163416	234	2.0871	0.906795	0.000247578	0.00582262	1	1.85997	2.25471	2.14662
PG2458	P31324;H3BK84;Q3V2X9	cAMP-dependent protein kinase type II-beta regulatory subunit	Prkar2b	0.00496393	-0.255002	0.036695	-0.288041	235	1.99395	0.895167	0.000249071	0.00582262	1	2.11352	2.03344	1.83488
PG0332	A0A0R4J268;G3X8V6;B9EHD2;O70458-2;O70458	Oncostatin-M-specific receptor subunit beta	Osmr	0.0945287	-0.249439	-0.0725228	-0.288543	236	-1.99695	0.0385174	0.000254094	0.00582262	1	-1.83012	-2.03006	-2.13068
PG0999	Q545R3;Q3TSR4;B7ZWC0;Q62433;Q3TD08	Protein NDRG1	Ndrg1	0.00687711	0.307582	-0.0103021	0.39786	237	-2.16432	0.0303416	0.000254621	0.00582262	1	-2.376	-2.2324	-1.88456
PG3646	Q4FK16;Q99M50;Q3UDV5;Q9JJ00	Phospholipid scramblase 1	Plscr1	0.169155	-0.286308	-0.160229	-0.339575	238	2.06643	0.904978	0.000256539	0.00582262	1	2.29716	1.98065	1.92148
PG2371	P21550;Q4FK59;Q5SX59	Beta-enolase;Enolase	Eno3	-0.492245	0.0109677	0.619433	0.0767507	239	2.40045	0.940589	0.000257197	0.00582262	1	2.08231	2.78704	2.332
PG1235	D3Z041;P41216	Long-chain-fatty-acid--CoA ligase 1	Acsl1	0.0653893	0.646019	-0.10824	0.805817	240	2.78269	0.96657	0.000257456	0.00582262	1	2.40412	2.60407	3.33989
PG3740	Q3ULI5;Q80W00-2;Q80W00	Serine/threonine-protein phosphatase 1 regulatory subunit 10	Ppp1r10	-0.118162	-0.730949	0.224025	-0.85843	241	2.76408	0.964753	0.000257507	0.00582262	1	3.09532	2.99166	2.20526
PG4799	Q8BYR2	Serine/threonine-protein kinase LATS1	Lats1	-0.127452	-0.0603733	0.182058	-0.0399239	242	1.92631	0.884811	0.000258371	0.00582262	1	1.85618	2.03491	1.88784
PG6112	Q9JJ78	Lymphokine-activated killer T-cell-originated protein kinase	Pbk	-0.00472558	-0.171939	0.041867	-0.18596	243	1.91743	0.883358	0.000258812	0.00582262	1	1.98246	1.949	1.82081
PG3831	Q3UY68;Q91YS8;Q8BJA6;D3Z368	Calcium/calmodulin-dependent protein kinase type 1	Camk1	0.238693	0.502172	-0.307294	0.6163	244	2.56836	0.952035	0.000261671	0.00582262	1	2.37256	2.2784	3.05412
PG1180	D3YVW2;Q8BXA1	Golgi integral membrane protein 4	Golim4	-0.225444	0.254415	0.276073	0.351924	245	-2.18834	0.0294331	0.000261792	0.00582262	1	-2.49972	-2.06079	-2.0045
PG2325	P16125;Q5M8R7;D3Z7F0	L-lactate dehydrogenase B chain;L-lactate dehydrogenase	Ldhb	0.103848	0.0342422	-0.106367	0.0566411	246	-1.91621	0.0432413	0.000262518	0.00582262	1	-1.91169	-2.01023	-1.8267
PG5032	Q8K1R7;Q69Z43	Serine/threonine-protein kinase Nek9	Nek9	-0.167689	-0.74229	0.285075	-0.868232	247	2.79601	0.967297	0.000263453	0.00582262	1	3.10601	3.0653	2.21674
PG2467	P32507;Q91VT9;Q8C6F2;Q3TZU9;Q80XJ5;P32507-2	Nectin-2	Pvrl2	-0.0486686	-0.243302	0.100902	-0.26941	248	-1.96398	0.0399709	0.000263805	0.00582262	1	-1.88158	-1.88384	-2.12651
PG2807	P62340;Q8K073	TATA box-binding protein-like protein 1	Tbpl1	0.0306519	-0.0381466	-0.0117229	-0.0256808	249	1.87313	0.873728	0.000266652	0.00582262	1	1.8791	1.85123	1.88907
PG1561	E9Q8L9;A0A1B0GRJ0;Q9D620	Rab11 family-interacting protein 1	Rab11fip1	0.301876	-0.0158816	-0.342892	-0.0205934	250	-2.06374	0.0352471	0.00026697	0.00582262	1	-1.91785	-2.30652	-1.96683
PG3048	Q03350;Q7TMT3;Q8K2B7	Thrombospondin-2	Thbs2	0.177527	0.217063	-0.210368	0.273593	251	-2.08577	0.0339753	0.000267681	0.00582262	1	-2.14767	-2.27313	-1.83652
PG4257	Q6NSP9;P52927	High mobility group protein HMGI-C	Hmga2	0.697481	-0.877578	-0.754926	-1.10359	252	3.64437	0.995276	0.000268891	0.00582262	1	4.52253	3.24795	3.16261
PG5119	Q8R1G6	PDZ and LIM domain protein 2	Pdlim2	0.37595	-0.162085	-0.421245	-0.20491	253	2.18074	0.91915	0.000269145	0.00582262	1	2.45479	1.90633	2.18109
PG3868	Q3V3R1	Monofunctional C1-tetrahydrofolate synthase, mitochondrial	Mthfd1l	-0.103083	-0.0594231	0.152388	-0.0407476	254	1.8931	0.878089	0.000270074	0.00582262	1	1.83616	1.98205	1.86108
PG5226	Q8VDP4	Cell cycle and apoptosis regulator protein 2	Ccar2	-0.0548286	-0.196892	0.104698	-0.212313	255	1.91978	0.884084	0.000270801	0.00582262	1	1.97129	1.99609	1.79197
PG1995	Q58E49;O09106;D3YYI8	Histone deacetylase;Histone deacetylase 1	Hdac1;Gm10093	0.663717	-0.526266	-0.741817	-0.67243	256	3.00605	0.977834	0.00027082	0.00582262	1	3.65763	2.57039	2.79013
PG5356	Q91XX1;Q4KMN6		Pcdhgc3	0.0610965	0.00399982	-0.0520445	0.023239	257	1.87444	0.874455	0.000273167	0.00582546	1	1.87269	1.82027	1.93035
PG5900	Q9D7M8	DNA-directed RNA polymerase II subunit RPB4	Polr2d	-0.461942	0.449845	0.54778	0.609486	258	2.7208	0.961119	0.000273535	0.00582546	1	2.16051	3.00046	3.00144
PG2897	P70302;A0A1B0GRA5;A0A1B0GR78	Stromal interaction molecule 1	Stim1	-0.0082803	0.126246	0.022506	0.177959	259	-1.92878	0.0419695	0.000274127	0.00582546	1	-2.04189	-1.95057	-1.79388
PG3857	Q3V1M1	Immunoglobulin superfamily member 10	Igsf10	0.525966	0.181546	-0.630725	0.201935	260	-2.48601	0.019077	0.000275192	0.00582559	1	-2.33028	-2.94504	-2.1827
PG3888	Q4FZC9;Q4FZC9-2	Nesprin-3	Syne3	-0.137921	-0.1094	0.198667	-0.0988587	261	1.90578	0.880814	0.000278838	0.0058626	1	1.85871	2.03198	1.82665
PG1493	F6Z1C2;E9Q3F3;E9Q3N9;Q9JM06;Q542X5;G5E8D6;Q9WVJ9	EGF-containing fibulin-like extracellular matrix protein 2	Efemp2	-0.17828	-0.0714881	0.244671	-0.0493433	262	-1.92809	0.0421512	0.00027907	0.0058626	1	-2.02034	-1.77679	-1.98715
PG5951	Q9DB27;Q9DB27-2	Malignant T-cell-amplified sequence 1	Mcts1	-0.313709	-0.586172	0.450019	-0.66597	263	2.5684	0.952217	0.000283067	0.00591627	1	2.70377	2.92492	2.07653
PG5948	Q9DB15	39S ribosomal protein L12, mitochondrial	Mrpl12	-0.0657184	-1.06975	0.187236	-1.27586	264	3.4456	0.991824	0.000285671	0.00591627	1	4.00657	3.69514	2.63508
PG0247	A3KMF3;A0A0R4J0J3;Q75NR7;Q75NR7-2	ATP-dependent DNA helicase Q4	Recql4	-3.15562	-0.616369			265	-3.94899	0.00090843	0.00028591	0.00591627	1	-4.08329		-3.81468
PG1217	D3YYT0;Q8BSI9;Q3UIC2;P15116	Cadherin-2	Cdh2	0.165545	0.0418666	-0.181904	0.0609197	266	1.91579	0.882994	0.000285924	0.00591627	1	1.95062	1.77103	2.02571
PG3087	Q3U2Z5;Q08509;Q3UGL1;Q3UFL4	Epidermal growth factor receptor kinase substrate 8	Eps8	-0.00987356	0.0775365	0.0283089	0.118689	267	1.8739	0.874092	0.000288537	0.00593324	1	1.78866	1.86256	1.97047
PG3144	Q2M2Q8;Q3TE41;Q920Q6-3;Q920Q6-2;Q920Q6;B1AT10	RNA-binding protein Musashi homolog 2	Msi2	0.679479	0.636225	-0.853271	0.743917	268	3.3038	0.987282	0.000290241	0.00593324	1	3.27757	2.63642	3.99741
PG3472	Q3TZZ7	Extended synaptotagmin-2	Esyt2	-0.0498693	-0.0311627	0.0855151	-0.0106138	269	1.84186	0.867188	0.000290699	0.00593324	1	1.79826	1.88297	1.84434
PG5187	Q8VC30;Q3UTZ4	Bifunctional ATP-dependent dihydroxyacetone kinase/FAD-AMP lyase (cyclizing);ATP-dependent dihydroxyacetone kinase;FAD-AMP lyase (cyclizing)	Dak	-0.0321524	0.151844	0.0494658	0.211117	270	1.9244	0.884448	0.000291525	0.00593324	1	1.78269	1.91686	2.07364
PG4224	Q69ZY2;Q8C522;Q3UQH3	Endonuclease domain-containing 1 protein	Endod1	-0.106739	0.530841	0.109956	0.679363	271	2.48692	0.946039	0.000292479	0.00593324	1	2.07924	2.46753	2.91399
PG2597	P49817;D3Z148;H3BKG0;P49817-2	Caveolin-1;Caveolin	Cav1	-0.131459	0.0580109	0.177524	0.104769	272	1.89676	0.879179	0.000293831	0.00593324	1	1.75444	1.98624	1.94959
PG3648	Q3UDY2;Q9JI99;Q3U4P6	Sphingosine-1-phosphate phosphatase 1	Sgpp1	-0.242088	-0.158108	0.329044	-0.149784	273	1.98349	0.893169	0.000295294	0.00593324	1	1.9064	2.2021	1.84197
PG1968	Q53ZU7;O08709;Q6GT24;Q6A0D0;D3Z0Y2;Q8BPD3	Peroxiredoxin-6	Prdx6	0.0525473	0.142228	-0.0526379	0.1925	274	-1.91116	0.043968	0.000295866	0.00593324	1	-1.99939	-1.98456	-1.74954
PG4917	Q8CD19	LanC-like protein 3	Lancl3	-0.281274	0.214561	0.347043	0.307866	275	2.13825	0.914062	0.000296446	0.00593324	1	1.8189	2.31791	2.27793
PG3753	Q3UMM1;Q922F4;Q3U9U3;Q9CUN8	Tubulin beta-6 chain	Tubb6	0.0430405	-0.131652	-0.0193439	-0.140716	276	1.83689	0.865916	0.00030037	0.00594748	1	1.90509	1.82272	1.78287
PG1990	Q3TXC7;Q3TWV1;Q3TMX0;O88601;Q3UBE4;Q3U902;Q3U6Q3;Q3U6J5;Q3TET7;O08992;Q3UC68;Q3U724;Q3UB97	Syntenin-1	Sdcbp	-0.626824	0.507313	0.743465	0.69298	277	3.00565	0.977471	0.000300866	0.00594748	1	2.31836	3.4062	3.2924
PG3960	Q544F6;Q9CQI6	Coactosin-like protein	Cotl1	0.352171	-0.35102	-0.377362	-0.433377	278	-2.23341	0.0279797	0.000301304	0.00594748	1	-1.86117	-2.45321	-2.38586
PG2322	P15920;A0A0G2JFS2	V-type proton ATPase 116 kDa subunit a isoform 2	Atp6v0a2	0.300403	-0.35814	-0.313924	-0.437849	279	-2.18012	0.0297965	0.00030148	0.00594748	1	-1.83289	-2.35722	-2.35026
PG0947	Q3UHN1;B2RX06;Q9WVB4	Slit homolog 3 protein	Slit3	0.261016	-0.337898	-0.267696	-0.409961	280	-2.10529	0.0328852	0.00030884	0.00607092	1	-1.79225	-2.25473	-2.2689
PG1597	Q7TQG5;E9QK04;P97798-5;P97798-2;P97798-3;P97798-4;P97798	Neogenin	Neo1	0.194877	0.160516	-0.226949	0.203223	281	1.97343	0.892078	0.000310661	0.0060816	1	1.95472	1.78287	2.18268
PG5106	Q8R0H9;Q3TB03	ADP-ribosylation factor-binding protein GGA1	Gga1	-0.194772	-0.36075	0.287671	-0.40075	282	2.07801	0.905887	0.000312745	0.0060816	1	2.14733	2.29701	1.78969
PG3703	Q3UIB5;Q99LB2;Q9DCL1	Dehydrogenase/reductase SDR family member 4	Dhrs4	-0.645081	0.326552	0.779991	0.474031	283	2.77991	0.966206	0.000313621	0.0060816	1	2.18909	3.22912	2.92152
PG3535	Q3U434;Q5M9P7;Q9CR86;Q3UD53	Calcium-regulated heat stable protein 1	Carhsp1	2.97088	0.56184			284	3.726	0.996366	0.000313803	0.0060816	1	3.79486		3.65714
PG2980	P97384;D3Z7U0	Annexin A11;Annexin	Anxa11	0.201385	0.034494	-0.224846	0.0490133	285	1.89668	0.878997	0.000315028	0.00608351	1	1.95609	1.72468	2.00927
PG1960	O08553	Dihydropyrimidinase-related protein 2	Dpysl2	-0.116092	-0.0195439	0.16502	0.00894232	286	1.83299	0.865371	0.000316112	0.00608351	1	1.74515	1.92481	1.829
PG1717	F8VPV0;P48725;P48725-3;Q80U10;P48725-2;Q8CDL2	Pericentrin	Pcnt	-0.189322	0.143137	0.24104	0.213285	287	1.9509	0.889172	0.000320296	0.00608462	1	1.72564	2.07056	2.05649
PG0743	A6H8H2;A6H8H2-2;E9Q449	DENN domain-containing protein 4C	Dennd4c	0.186682	-0.0158219	-0.202994	-0.0111496	288	1.86297	0.871366	0.000321942	0.00608462	1	1.94381	1.71221	1.9329
PG0629	A2APY6;Q3V1V3;B2RXU2	ESF1 homolog	Esf1	0.347615	0.395885	-0.431139	0.477825	289	2.37444	0.939135	0.000324326	0.00608462	1	2.30289	2.01749	2.80293
PG4403	Q71RI9-2;Q71RI9	Kynurenine--oxoglutarate transaminase 3	Ccbl2	0.214441	-0.204531	-0.221722	-0.243534	290	-1.92691	0.0425145	0.000324399	0.00608462	1	-1.71893	-2.06428	-1.99751
PG1434	E9PYG6;Q91YX7;Q3V090;Q3TTA2		Rasa1	-0.111558	-0.0630539	0.162968	-0.0444859	291	1.81518	0.862827	0.00032633	0.00608462	1	1.7556	1.91158	1.77834
PG2129	Q3TNY7;Q3UY25;O70326	Gremlin;Gremlin-1	Grem1	0.193764	-0.368479	-0.18359	-0.441783	292	-2.05555	0.0356105	0.000326825	0.00608462	1	-1.7624	-2.1455	-2.25876
PG0920	B2RUH2;Q6GQW0;Q8BRL1;E9QJW1;H7BWX5	Ankyrin repeat and BTB/POZ domain-containing protein BTBD11	Btbd11	0.417745	0.449286	-0.520552	0.537241	293	2.53201	0.94931	0.000327296	0.00608462	1	2.4685	2.10897	3.01857
PG0073	Q3TM87;Q3TAB9;A0A0A0MQN4;Q9D906;S4R2D5;S4R2T5;S4R2P7;S4R1T0	Ubiquitin-like modifier-activating enzyme ATG7	Atg7	-0.266823	0.242493	0.327274	0.340752	294	2.1009	0.909157	0.000328371	0.00608462	1	1.77321	2.26375	2.26573
PG4217	Q69ZN7;E9Q390;Q69ZN7-4	Myoferlin	Myof	-0.179662	-0.072956	0.246467	-0.0510209	295	1.85478	0.869368	0.00033009	0.00608462	1	1.76262	2.00746	1.79425
PG0435	Q7TME9;A0A1G5SLJ2;A0A1G5SL47;Q7TME8;A0A1G5SJ89;A0A1G5SK24;A0A0A0MQG6;Q8C7F7		Slfn9	-0.228266	-0.0564335	0.304184	-0.0269182	296	-1.89454	0.0454215	0.000331282	0.00608462	1	-2.02388	-1.70614	-1.95359
PG4616	Q8BHC4;Q6PDP7	Dephospho-CoA kinase domain-containing protein	Dcakd	0.0720328	-0.148645	-0.0532055	-0.163797	297	-1.80629	0.050327	0.000332501	0.00608462	1	-1.7117	-1.84043	-1.86675
PG1621	E9QMA2;Q6PFX1;Q3TNH5;Q9Z106;Q3V345;Q3TNH5-2;Q3TNH5-3	Protein FAM172A	Fam172a	0.430559	0.117274	-0.50975	0.131318	298	2.18242	0.919695	0.000332602	0.00608462	1	2.32227	1.81173	2.41327
PG1049	E9QMV2;C6EQJ5;Q4KML4	Costars family protein ABRACL	Abracl	-0.105768	0.0181976	0.149484	0.0541274	299	1.81295	0.8621	0.000333452	0.00608462	1	1.70865	1.88941	1.84079
PG5141	Q8R366;G3UYZ1;A0A0R4J117	Immunoglobulin superfamily member 8	Igsf8	-0.197254	-0.130001	0.272362	-0.119155	300	-1.87462	0.0472384	0.000334637	0.00608462	1	-1.94301	-1.69713	-1.98372
PG5630	Q9CQR6;A0A0N4SVL9	Serine/threonine-protein phosphatase 6 catalytic subunit;Serine/threonine-protein phosphatase 6 catalytic subunit, N-terminally processed	Ppp6c	-0.147859	0.774889	0.140516	0.980318	301	2.91113	0.974201	0.000335595	0.00608462	1	2.33608	2.87858	3.51872
PG6087	Q9JHP7;Q9JHP7-2;Q9JHP7-3	KDEL motif-containing protein 1	Kdelc1	-0.50268	0.288858	0.61004	0.41648	302	2.45116	0.943859	0.000335825	0.00608462	1	1.96297	2.7937	2.5968
PG2247	Q3UF30;Q3TC45;P08207	Protein S100-A10	S100a10	0.983388	0.089297	-1.17894	0.0522281	303	3.26117	0.986737	0.000335846	0.00608462	1	3.72953	2.45408	3.59989
PG6176	Q9QYR9;Q6P2K2	Acyl-coenzyme A thioesterase 2, mitochondrial	Acot2	-0.0223642	-0.114964	0.0587647	-0.115044	304	1.78045	0.857558	0.000338014	0.00608462	1	1.80188	1.81538	1.72409
PG1012	B9EHZ5;Q3UN60;Q9JLB0-2;Q9JLB0;Q6NSS8;Q811G2;E9PWC5;Q3TPA2	MAGUK p55 subfamily member 6	Mpp6	0.167808	-0.237444	-0.162473	-0.279877	305	-1.89381	0.0456032	0.000339454	0.00608462	1	-1.6927	-1.98772	-2.001
PG2072	O35969;O35969-2	Guanidinoacetate N-methyltransferase	Gamt	0.0384905	-0.115572	-0.0150946	-0.120737	306	1.77755	0.857195	0.000340867	0.00608462	1	1.83368	1.76398	1.73499
PG5285	Q91V64;Q9D096	Isochorismatase domain-containing protein 1	Isoc1	0.36693	0.00343135	-0.423433	-0.00233394	307	2.03338	0.900981	0.000341205	0.00608462	1	2.20456	1.73498	2.16059
PG1959	O08547;E9Q6R3;Q3UZ06	Vesicle-trafficking protein SEC22b	Sec22b	-0.0364175	0.226819	0.0486923	0.302894	308	-1.92628	0.0428779	0.000341507	0.00608462	1	-2.11468	-1.94454	-1.71961
PG0349	A0A0U1RQ55;Q78JW9	Ubiquitin domain-containing protein UBFD1	Ubfd1	-0.379704	0.320146	0.458201	0.444631	309	2.29471	0.931323	0.00034451	0.00608462	1	1.85744	2.53311	2.49358
PG0445	A0A1L1SS44;Q3TPZ7;Q60709;Q3UDL6;Q61482;Q7TT34;Q64348;Q06335-2;Q06335;Q3U775;Q3U9N6	Amyloid-like protein 2	Aplp2	0.14467	-0.286521	-0.130474	-0.337842	310	-1.91209	0.0437863	0.000345895	0.00608462	1	-1.69506	-1.97827	-2.06295
PG0239	A0A0R4J0G0;Q8BH04;Q8R3X7;Q3TDE6;Q3UGF0	Phosphoenolpyruvate carboxykinase [GTP], mitochondrial	Pck2	-0.157777	0.103553	0.205871	0.162447	311	1.86486	0.872093	0.000346797	0.00608462	1	1.68079	1.96679	1.94701
PG1769	G1EE51;Q99LJ7;E9Q3B1;Q99LJ7-2	RCC1 and BTB domain-containing protein 2	Rcbtb2	-0.262803	0.0756142	0.335643	0.13692	312	1.94	0.887718	0.000346884	0.00608462	1	1.71316	2.1311	1.97574
PG4268	Q6NVF4	DNA helicase B	Helb	-0.207259	-0.152356	0.286288	-0.145602	313	1.87484	0.874637	0.000347246	0.00608462	1	1.81402	2.06454	1.74598
PG3498	Q6PDS2;Q68FN3;Q3U1Z8;Q52KC0;Q8BU04	Putative E3 ubiquitin-protein ligase UBR7	Ubr7	0.176572	-0.255466	-0.171686	-0.302567	314	1.90318	0.880632	0.000347359	0.00608462	1	2.11988	1.80566	1.784
PG3765	Q3UNJ3;Q61576;A2A4H9	Peptidyl-prolyl cis-trans isomerase FKBP10	Fkbp10	-0.0294672	0.209483	0.0416276	0.281188	315	-1.89742	0.0450581	0.000348869	0.00608462	1	-2.07165	-1.91797	-1.70263
PG4153	Q8CC06;Q61739-2;Q61739;Q6PEE8;Q80ZI8;Q8BR82;F6VSK8;Q3TWK2	Integrin alpha-6;Integrin alpha-6 heavy chain;Integrin alpha-6 light chain	Itga6	-0.214776	0.212436	0.26645	0.299864	316	1.99146	0.894622	0.000349892	0.00608462	1	1.7109	2.1184	2.14508
PG3101	Q0VBA4;Q9D7S7-2;Q9D7S7	60S ribosomal protein L22-like 1	Rpl22l1	0.0597566	-0.12341	-0.0402999	-0.132025	317	1.77212	0.856286	0.000350441	0.00608462	1	1.84488	1.74303	1.72844
PG2747	Q4FJL0;Q3U621;P61027	Ras-related protein Rab-10	Rab10	0.11464	-0.0412682	-0.113478	-0.03632	318	1.77599	0.857013	0.000354101	0.00612885	1	1.83121	1.68758	1.8092
PG1899	V9GX00;Q6PDI9;H6WCS3;Q00560;Q3UQA0	Interleukin-6 receptor subunit beta	Il6st;il6st	0.375298	-0.10626	-0.424885	-0.13678	319	-2.01724	0.0383358	0.000361504	0.00620018	1	-1.77654	-2.30165	-1.97354
PG0301	A0A0R4J1D0;P59108;Q3TVB2;Q8QZU9	Copine-2	Cpne2	-0.0714518	0.101699	0.101177	0.153164	320	1.80297	0.860283	0.000361595	0.00620018	1	1.6687	1.83627	1.90392
PG1688	F6YT88;Q3TZ08;Q6VVW5;B1AWI7;Q6VVW5-2	Guanylate cyclase;Atrial natriuretic peptide receptor 2	Npr2	0.0414896	-0.663588	0.0247796	-0.789273	321	2.40306	0.94077	0.000361602	0.00620018	1	2.78461	2.49039	1.93418
PG1771	G3CE24;G3CE68;G3CE17;G3CDY6;G3CE70;G3BKB2;Q9CRC0	Vitamin K epoxide reductase complex subunit 1	Vkorc1	-0.301948	-0.0403598	0.392394	-0.00132267	322	-1.93023	0.0417878	0.000365002	0.00621413	1	-2.11066	-1.686	-1.99404
PG4918	Q8CD92-2;Q8CD92	Tetratricopeptide repeat protein 27	Ttc27	0.118771	-0.840764	-0.0550089	-1.01162	323	2.76197	0.964571	0.000365595	0.00621413	1	3.29179	2.82096	2.17316
PG0627	A2API8;F7AA26;O54931-2;O54931;Q8C9L6;Q99L95;Q69ZV5;O54931-3;O54931-5;O54931-4	A-kinase anchor protein 2	Akap2;Pakap;mKIAA0920	-0.447672	0.32779	0.540142	0.459482	324	2.36182	0.937318	0.000366418	0.00621413	1	1.88168	2.65307	2.5507
PG2739	Q3UIS6;Q569V4;Q3UBK1;P60762-2;P60762;A0A087WQB0;Q3U5J6;Q5DTS9	Mortality factor 4-like protein 1	Morf4l1	0.149263	0.847331	-0.226089	1.04449	325	3.00082	0.977289	0.000366932	0.00621413	1	2.55066	2.71725	3.73456
PG1708	F7DBB3;Q3URZ6		Ahnak2	-0.146467	0.181362	0.185956	0.256414	326	1.88581	0.876635	0.000371732	0.00627612	1	1.66216	1.96403	2.03124
PG5383	Q91ZE0	Trimethyllysine dioxygenase, mitochondrial	Tmlhe	-0.156299	-0.0194489	0.213843	0.0123291	327	-1.78591	0.0508721	0.000373673	0.00628477	1	-1.89649	-1.66198	-1.79926
PG4628	Q8BHS6	Armadillo repeat-containing X-linked protein 3	Armcx3	0.479315	-0.230773	-0.541327	-0.297082	328	-2.20031	0.0288881	0.000376128	0.00628477	1	-1.82735	-2.54435	-2.22924
PG6225	Q9WTP7;Q9D8W6	GTP:AMP phosphotransferase AK3, mitochondrial	Ak3	-0.135774	-0.29214	0.21057	-0.321881	329	1.88037	0.875545	0.000377421	0.00628477	1	1.94245	2.0393	1.65935
PG2613	Q3TWI4;P51432;Q8CI86;Q571K9	Phosphoinositide phospholipase C;1-phosphatidylinositol 4,5-bisphosphate phosphodiesterase beta-3	Plcb3	-0.0489623	-0.183396	0.0965021	-0.196332	330	1.76595	0.85556	0.000378178	0.00628477	1	1.8128	1.83503	1.65003
PG4613	Q8BHA3;Q8BHA3-2	Probable D-tyrosyl-tRNA(Tyr) deacylase 2	Dtd2	-0.00219228	0.117435	0.0158117	0.166719	331	1.78195	0.85774	0.000378179	0.00628477	1	1.67748	1.75696	1.91141
PG0028	E9Q9T1;A6H5U5;A0A087WPK3;Q3UZ39-2	Leucine-rich repeat flightless-interacting protein 1	Lrrfip1	0.0980871	0.00733922	-0.0972346	0.0243021	332	1.74663	0.852289	0.000379998	0.00628477	1	1.76379	1.66228	1.81383
PG5402	Q921Q7	Ras and Rab interactor 1	Rin1	-0.055613	-0.0429899	0.09343	-0.0245694	333	1.72783	0.84811	0.000382196	0.00628477	1	1.68798	1.77576	1.71975
PG3787	Q3URQ7-2;Q3URQ7	Methenyltetrahydrofolate synthase domain-containing protein	Mthfsd	-0.318712	-0.29753	0.433175	-0.313572	334	-2.03749	0.0368823	0.000382338	0.00628477	1	-2.07546	-1.73139	-2.30563
PG4305	Q6P9Q4	FH1/FH2 domain-containing protein 1	Fhod1	-0.237405	-0.0160991	0.31208	0.023012	335	1.84243	0.867369	0.000382522	0.00628477	1	1.6841	2.03053	1.81267
PG5856	Q9D2V7;Q8CA54;G3X9L5;E9PYU1	Coronin-7;Coronin	Coro7	-0.176515	0.0596523	0.232114	0.110436	336	1.81033	0.861737	0.000384454	0.00629177	1	1.64162	1.93551	1.85388
PG1807	G3UZY2;P97493	Thioredoxin, mitochondrial	Txn2	-0.647304	-2.95413			337	3.62294	0.994549	0.000385234	0.00629177	1	3.7612	3.48468
PG3954	Q543N3;Q61792;A2A6H0;A2A6G9	LIM and SH3 domain protein 1	Lasp1	0.0509487	-0.0373863	-0.0364337	-0.0264049	338	-1.71912	0.0550509	0.00038702	0.00630225	1	-1.70215	-1.75739	-1.69784
PG2319	Q5NC81;P15532;Q5NC80	Nucleoside diphosphate kinase;Nucleoside diphosphate kinase A	Nme1	-0.25698	0.665242	0.28175	0.855484	339	2.64498	0.957304	0.0003945	0.00632082	1	2.07312	2.72029	3.14155
PG1656	F2Z4A2;Q9JHH9;Q9CTG7	Coatomer subunit zeta-2	Copz2	0.164771	0.00386234	-0.177945	0.0146374	340	-1.76375	0.0519622	0.000395232	0.00632082	1	-1.70691	-1.90072	-1.68362
PG5839	Q9D1P4;A0A1L1SU22;A0A1L1STZ1	Cysteine and histidine-rich domain-containing protein 1	Chordc1	-0.456558	0.544986	0.533686	0.725069	341	2.62869	0.956032	0.000396448	0.00632082	1	2.01523	2.88611	2.98473
PG5566	Q9CPU4	Microsomal glutathione S-transferase 3	Mgst3	0.0389849	0.289223	-0.0478391	0.372861	342	1.92902	0.885538	0.00039677	0.00632082	1	1.74631	1.83875	2.20201
PG3619	Q3UBX0;D3Z7P2;D3Z3Z2;D3YX08;D3Z0I8	Transmembrane protein 109	Tmem109	0.136785	-0.370157	-0.114257	-0.439193	343	1.93223	0.886265	0.000397156	0.00632082	1	2.19422	1.88812	1.71435
PG3105	Q0VEC9;Q7TN89	GTPase ERas	Eras	-0.0300003	0.10393	0.0506569	0.152512	344	-1.75476	0.0525073	0.000397733	0.00632082	1	-1.86695	-1.75499	-1.64235
PG2397	Q3UWL3;Q3TQW9;Q3TFV6;P24860;Q68EM3;C5IGX4;G3UY65	G2/mitotic-specific cyclin-B1	Ccnb1	-0.762082	-2.75897			345	3.43521	0.990916	0.000398431	0.00632082	1	3.45599	3.41444
PG4393	Q6ZWQ7		Spcs3	2.75939	0.513001			346	3.45875	0.992006	0.00040249	0.00632082	1	3.52619		3.3913
PG2103	Q5SVF7;O55125;Q3UGS1;Q5SVG6	Protein NipSnap homolog 1	Nipsnap1	0.0507368	-0.181273	-0.0247506	-0.201854	347	1.73679	0.849927	0.000402589	0.00632082	1	1.83865	1.72582	1.64591
PG3662	Q3UFV9;Q91YW3;Q3UKA1	DnaJ homolog subfamily C member 3	Dnajc3	0.174756	0.133653	-0.200379	0.172102	348	-1.82148	0.0496003	0.000403832	0.00632082	1	-1.83567	-1.9909	-1.63788
PG4730	Q8BT07;Q8BT07-2	Centrosomal protein of 55 kDa	Cep55	0.123055	-0.071725	-0.12128	-0.074146	349	1.72574	0.847747	0.00040445	0.00632082	1	1.80369	1.63634	1.73718
PG3894	Q4KL76;Q64433;Q9JI95	10 kDa heat shock protein, mitochondrial	Hspe1;Cpn10-rs1	-0.0166884	-0.114275	0.0518168	-0.114666	350	-1.70527	0.0557776	0.000405179	0.00632082	1	-1.68105	-1.675	-1.75976
PG5783	Q9CZW4;E9PUC2	Long-chain-fatty-acid--CoA ligase 3	Acsl3	-0.136132	0.00642953	0.187296	0.0422466	351	1.74328	0.851744	0.00040622	0.00632082	1	1.6288	1.84622	1.75483
PG1516	E9Q4X2		Uggt2	0.0424571	0.267435	-0.0503259	0.346008	352	-1.89247	0.0461483	0.000406525	0.00632082	1	-2.06035	-1.98141	-1.63565
PG3294	Q3TYS4;Q3TIS3;Q9D662;Q3UKB4;Q3TAW4;Q8CDS4	Protein transport protein Sec23B	Sec23b	-0.129364	-0.151179	0.191591	-0.150503	353	-1.75123	0.052689	0.00040758	0.00632082	1	-1.76879	-1.62399	-1.86091
PG2972	Q545H7;P97352;A0A0A0MQ90	Protein S100-A13	S100a13	0.220358	0.8942	-0.316156	1.09586	354	3.0544	0.980196	0.000408834	0.00632082	1	2.61667	2.70519	3.84134
PG6119	Q9JJG9;Q8BMY1	Nitric oxide-associated protein 1	Noa1	0.437462	0.134481	-0.519501	0.15174	355	2.09731	0.908067	0.000410094	0.00632082	1	2.23089	1.71786	2.34319
PG6231	Q9WU28;Q6ZWY7;E9PZ62;E9PVG3	Prefoldin subunit 5	Pfdn5	0.233616	0.692961	-0.316278	0.849376	356	2.64943	0.957667	0.000410563	0.00632082	1	2.33806	2.32757	3.28267
PG2582	P48774;E9PVM7;E9PV63	Glutathione S-transferase Mu 5	Gstm5	0.019878	0.202573	-0.0177532	0.268748	357	-1.81685	0.0499637	0.000410896	0.00632082	1	-1.95916	-1.87552	-1.61587
PG1572	E9Q9D6;Q148X5;Q80TM6-2;Q80TM6-4;Q80TM6-3;Q80TM6;Q5XKA9;F6Z9T5	R3H domain-containing protein 2	R3hdm2	-0.271382	0.0236467	0.350189	0.0742452	358	1.8523	0.868459	0.000412131	0.00632082	1	1.65131	2.06004	1.84553
PG3078	Q922A2;Q3TJ49;Q07076;Q3UYL7;Q8BP75;Q8CCV9	Annexin;Annexin A7	Anxa7	0.0289793	0.0122122	-0.0136905	0.0358665	359	1.69561	0.842297	0.00041514	0.00632082	1	1.67089	1.66555	1.7504
PG0203	A0A0R4IZY9;Q91XI1;Q91XI1-2	tRNA-dihydrouridine(47) synthase [NAD(P)(+)]-like	Dus3l	-0.00865839	0.00459542	0.0326252	0.0296399	360	1.69169	0.840843	0.000416701	0.00632082	1	1.65023	1.69314	1.73171
PG2928	P70699	Lysosomal alpha-glucosidase	Gaa	0.0505951	0.180301	-0.0532904	0.239089	361	-1.79376	0.0506904	0.000416786	0.00632082	1	-1.90557	-1.87277	-1.60293
PG4671	Q8BKT8;Q8BKT8-2	HAUS augmin-like complex subunit 7	Haus7	0.145092	-0.565247	-0.108853	-0.677777	362	2.1841	0.920058	0.000417028	0.00632082	1	2.56602	2.17013	1.81615
PG3308	Q3TLY3;Q3TJB5;Q61140-2;Q61140;Q3TXP6;Q3TJP4;Q3TIT7	Breast cancer anti-estrogen resistance protein 1	Bcar1	-0.220949	-0.167382	0.304108	-0.162812	363	-1.81309	0.0501453	0.000417372	0.00632082	1	-1.87277	-1.60962	-1.95688
PG5300	Q91VM9;D3Z636;Q91VM9-2	Inorganic pyrophosphatase 2, mitochondrial	Ppa2	0.141239	0.261708	-0.169841	0.330988	364	-1.90454	0.0445131	0.000418019	0.00632082	1	-2.01329	-2.07131	-1.62901
PG2780	P62073	Mitochondrial import inner membrane translocase subunit Tim10	Timm10	-0.242668	-0.0740255	0.323073	-0.0471996	365	1.80567	0.860828	0.000420217	0.00633664	1	1.67858	2.00889	1.72953
PG2740	P60766;Q3UL78;P60766-1	Cell division control protein 42 homolog	Cdc42	-0.332345	-1.17439	0.519362	-1.38177	366	3.4843	0.992551	0.000423062	0.00636211	1	3.95662	3.96658	2.5297
PG4905	Q8CC88;Q8CC88-2	von Willebrand factor A domain-containing protein 8	Vwa8	-0.148775	-0.35339	0.231222	-0.395516	367	1.89575	0.87827	0.00042509	0.0063666	1	1.98668	2.07662	1.62395
PG0108	E9Q2S0;A0A0A6YY83		Pcdh7	0.239238	-0.0969904	-0.260377	-0.114408	368	1.78672	0.858285	0.000427225	0.0063666	1	1.94517	1.60927	1.80573
PG1490	Q8CDH2;E9Q392;Q9QXK2;F6ZKR0;D3Z734;D3Z733;Q8CED3	E3 ubiquitin-protein ligase RAD18	Rad18	0.645065	-0.685615	-0.706511	-0.865236	369	2.88343	0.972747	0.000427453	0.0063666	1	3.61862	2.49271	2.53897
PG3743	Q3ULN6;Q8R127;J3QNN5	Saccharopine dehydrogenase-like oxidoreductase	Sccpdh	-0.0366284	-0.238513	0.0858994	-0.26455	370	-1.74681	0.0528706	0.000428144	0.0063666	1	-1.66045	-1.67719	-1.90279
PG4669	Q8BKS6;Q8C167-3;Q8C167-2;Q8C167	Prolyl endopeptidase-like	Prepl	-0.350661	-0.250335	0.46823	-0.253419	371	1.98373	0.89335	0.000430125	0.0063666	1	1.89985	2.30646	1.74487
PG3180	Q3TAN4;Q921L5;Q8C205;Q3TZZ9	Conserved oligomeric Golgi complex subunit 2	Cog2	0.0968874	0.0960111	-0.102819	0.132533	372	1.7311	0.848837	0.000430671	0.0063666	1	1.6952	1.63099	1.86711
PG4681	Q8BLU0;Q3UVS6		Flrt2	-0.282702	-0.125105	0.37575	-0.106233	373	1.844	0.867551	0.000431457	0.0063666	1	1.7245	2.08883	1.71867
PG3688	Q3UHB1;Q692V2	5-nucleotidase domain-containing protein 3	Nt5dc3	-0.00222604	0.338317	-0.00168703	0.436082	374	1.947	0.888808	0.00043614	0.00637662	1	1.71203	1.8804	2.24857
PG5346	Q91XB7	Protein YIF1A	Yif1a	-0.0198286	0.575862	0.000828266	0.727194	375	2.32362	0.933866	0.000437113	0.00637662	1	1.93839	2.22631	2.80616
PG2393	P24527	Leukotriene A-4 hydrolase	Lta4h	-0.0235792	0.0902361	0.0439458	0.13529	376	1.7071	0.845022	0.00043738	0.00637662	1	1.60663	1.70432	1.81035
PG2695	P57722-2;P57722;E9Q7D8;Q8CFQ6	Poly(rC)-binding protein 3	Pcbp3	0.548537	0.286472	-0.66647	0.328054	377	2.35058	0.935683	0.000438339	0.00637662	1	2.45706	1.85374	2.74094
PG0942	B2RWV7;Q8BQ30;Q8BQ30-2;B7ZND7	Phostensin	Ppp1r18	-0.0858874	0.00585694	0.126319	0.0374609	378	1.68823	0.840298	0.000438734	0.00637662	1	1.60244	1.75114	1.71112
PG1722	Q6KAT1;F8VQ06;Q61810-2;Q61810	Latent-transforming growth factor beta-binding protein 3	mFLJ00070;Ltbp3	-0.238432	-0.278551	0.334168	-0.296958	379	1.87529	0.874818	0.000439719	0.00637662	1	1.87141	2.11368	1.64078
PG0475	A0PK78;Q78PG9	Coiled-coil domain-containing protein 25	Ccdc25	0.187819	-0.0707843	-0.20001	-0.0782673	380	1.72968	0.848474	0.000440246	0.00637662	1	1.84363	1.58837	1.75705
PG1407	Q6PEV0;E9PWK1;Q8K2W5;Q9D379	Epoxide hydrolase 1	Ephx1	-0.312448	-0.476376	0.439769	-0.53218	381	-2.15435	0.0308866	0.000442741	0.00638398	1	-2.08314	-1.81954	-2.56038
PG1972	O08749;Q3TIE8	Dihydrolipoyl dehydrogenase, mitochondrial;Dihydrolipoyl dehydrogenase	Dld	-0.169133	-0.0590112	0.232571	-0.0348722	382	1.72219	0.846839	0.00044314	0.00638398	1	1.62773	1.86383	1.675
PG2902	P70336;P70336-2;F8VPK5;Q6A035;Q3UMT5	Rho-associated protein kinase 2;Rho-associated protein kinase	Rock2	-0.186258	-0.0948633	0.256217	-0.0771998	383	1.73641	0.849746	0.00044486	0.00638398	1	1.65347	1.89849	1.65727
PG5498	Q99L27	GMP reductase 2	Gmpr2	0.0649014	-0.295694	-0.0328676	-0.342539	384	1.78003	0.857376	0.000445394	0.00638398	1	1.95747	1.77931	1.60331
PG3975	Q54A37;Q571M4;Q8VC28	Aldo-keto reductase family 1 member C13	Akr1c13	0.211875	-0.0100389	-0.23405	-0.00614676	385	-1.74308	0.053234	0.000448029	0.00639577	1	-1.65144	-1.91507	-1.66274
PG1168	D3YUS5;Q0VAV5;E9PW37		Rasal2	0.055966	-0.390893	-0.014456	-0.457905	386	1.87543	0.875	0.00044854	0.00639577	1	2.10406	1.89979	1.62243
PG2281	Q3THV8;P11157	Ribonucleoside-diphosphate reductase subunit M2	Rrm2	-0.0584447	-0.228471	0.111598	-0.250528	387	1.72293	0.84702	0.000451157	0.00640254	1	1.79105	1.80809	1.56966
PG0578	A2AIH8;Q9D711;Q8C1Y5;Q8BNL6	Pirin	Pir	-0.369939	-0.219652	0.489206	-0.214434	388	1.96655	0.891533	0.000451342	0.00640254	1	1.85366	2.29889	1.74708
PG3915	Q4VAI2;Q9D358	Low molecular weight phosphotyrosine protein phosphatase	Acp1	-0.00637898	0.0228334	0.0284086	0.0516952	389	1.66283	0.834302	0.000453424	0.00641554	1	1.61188	1.65901	1.71759
PG1998	Q3U4T9;Q3TVX7;O09117-2;D6RFU9;O09117	Synaptophysin-like protein 1	Sypl;Sypl1	0.11636	-0.129353	-0.108572	-0.143877	390	1.68403	0.838844	0.000457741	0.00643741	1	1.79225	1.61085	1.649
PG1170	D3YUX2;Q8VBX6-2;Q8VBX6;Q8VBX6-4;B2RQR2;A3KG81	Multiple PDZ domain protein	Mpdz	0.201889	-0.0716542	-0.217029	-0.0804727	391	1.72373	0.847384	0.000458214	0.00643741	1	1.84613	1.57134	1.75372
PG1660	F6QL70;Q5M8M8;P47915;W4VSN7;A0A1L1SUN1;A0A1L1SS27;F6YH22	60S ribosomal protein L29	Gm17669;Rpl29;Gm3550;Gm5218	-0.535637	-1.07383	0.758274	-1.24261	392	3.38708	0.989462	0.000458478	0.00643741	1	3.68526	4.01282	2.46315
PG5592	Q9CQ56;Q5I940;E9Q496;Q05CJ0;Q9CQ56-2	Vesicle transport protein USE1	Use1	0.163485	0.187172	-0.19094	0.238284	393	1.79616	0.859193	0.000465025	0.00649405	1	1.744	1.62567	2.01883
PG0722	A4FUU9;Q9DBC0;B9EJ24	Selenoprotein O	Selo	0.0649186	-0.131615	-0.0459176	-0.142451	394	-1.661	0.0588663	0.000465394	0.00649405	1	-1.58048	-1.69266	-1.70986
PG3420	Q3TVJ8;Q9D8L3;Q62186;Q9D6F7;Q9DC94	Translocon-associated protein subunit delta	Ssr4	0.0854388	-0.0350992	-0.0785034	-0.0264215	395	-1.65358	0.0592297	0.000466552	0.00649405	1	-1.61849	-1.71982	-1.62242
PG2636	Q7TN91;Q4TU88;Q3UJM8;Q3UJL9;Q3UJH4;V9GXJ4;P52651	Homeobox protein Rhox5	Rhox5	1.77217	-2.20589			396	-3.404	0.00290698	0.000467232	0.00649405	1		-3.27395	-3.53405
PG4938	Q8CG19;Q8CG19-3;Q8CG19-2;B1B1E2	Latent-transforming growth factor beta-binding protein 1	Ltbp1	0.201916	-0.301101	-0.198841	-0.36028	397	1.82589	0.864099	0.000470261	0.0065197	1	2.08385	1.71673	1.6771
PG3943	Q542F1;Q9Z1Q5;Q3TIP8	Chloride intracellular channel protein;Chloride intracellular channel protein 1	Clic1	-0.129497	0.0794508	0.173439	0.130754	398	1.70496	0.844477	0.000472132	0.00652919	1	1.55108	1.78883	1.77496
PG1950	Q9D859;Q8BPG5;K7Q7T7;Q3TLP8;P63001;Q8C4N8;Q14A12;Q05144;P60764	Ras-related C3 botulinum toxin substrate 1;Ras-related C3 botulinum toxin substrate 2;Ras-related C3 botulinum toxin substrate 3	Rac1;Rac3;Rac2	-0.20966	0.201182	0.26113	0.285724	399	1.83631	0.865734	0.000477795	0.00659093	1	1.56529	1.96129	1.98237
PG5817	Q9D104;Q8BZ07;G5E8T3;Q9CRF7;Q9D7A6;Q3UXK5	Signal recognition particle 19 kDa protein	Srp19	-0.712523	0.295562	0.86436	0.441726	400	2.60149	0.954033	0.00048193	0.0066171	1	1.99092	3.11042	2.70313
PG6296	Q9Z2I8;C6EQH3;Q9Z2I8-2	Succinyl-CoA ligase [GDP-forming] subunit beta, mitochondrial;Succinyl-CoA ligase subunit beta	Suclg2	0.187774	-0.0935998	-0.198143	-0.106087	401	-1.69556	0.056141	0.000482096	0.0066171	1	-1.56816	-1.83253	-1.68598
PG5890	Q9D735	Uncharacterized protein C19orf43 homolog		-0.16187	0.0588034	0.214395	0.108209	402	1.70297	0.844295	0.000485763	0.00662435	1	1.54302	1.8166	1.74929
PG5126	Q8R2K3;Q9CYR0	Single-stranded DNA-binding protein;Single-stranded DNA-binding protein, mitochondrial	Ssbp1	0.461592	0.441407	-0.573178	0.524066	403	2.34858	0.93532	0.000486116	0.00662435	1	2.31447	1.892	2.83928
PG5708	Q9CX34	Suppressor of G2 allele of SKP1 homolog	Sugt1	-0.0243854	0.0828666	0.0455102	0.126369	404	1.66084	0.833576	0.000486571	0.00662435	1	1.56427	1.6601	1.75816
PG2703	Q3TLQ4;P58064	28S ribosomal protein S6, mitochondrial	Mrps6	-0.514716	-0.801026	0.711203	-0.911628	405	2.81671	0.968023	0.000488654	0.00662435	1	2.96555	3.37431	2.11026
PG3934	Q8R2S3;Q8C550;Q53YU5;Q9D1X0	Nucleolar protein 3	Nol3	0.271983	0.0119964	-0.308801	0.0158349	406	1.76399	0.855196	0.000489168	0.00662435	1	1.87653	1.53983	1.8756
PG2202	O89032-3;O89032-2;O89032	SH3 and PX domain-containing protein 2A	Sh3pxd2a	-0.311477	-0.0904087	0.407942	-0.0615809	407	1.81079	0.861919	0.000493312	0.00662435	1	1.65456	2.07207	1.70575
PG0864	B2RQQ7;Q7TT50	Non-specific serine/threonine protein kinase;Serine/threonine-protein kinase MRCK beta	Cdc42bpb	-0.176683	-0.0153326	0.238272	0.019007	408	1.68573	0.83939	0.000494274	0.00662435	1	1.56122	1.82517	1.67081
PG0488	A1L0U3;B9EI85;P84228	Histone H3;Histone H3.2	Hist1h3e;Hist2h3b;Hist1h3b	-0.949778	0.971666	1.09882	1.28552	409	3.87894	0.998001	0.000494766	0.00662435	1	2.73509	4.44997	4.45177
PG3348	Q3U6G8;Q3TME1;Q9R0Q4;A2AEB5;A2AEB4;A2AEB3;Q3TXN7	Mortality factor 4-like protein 2	Morf4l2	-0.344735	0.0730335	0.435354	0.140438	410	1.87087	0.873547	0.000496026	0.00662435	1	1.59931	2.12791	1.88538
PG5808	Q9D0M5	Dynein light chain 2, cytoplasmic	Dynll2	-0.683406	-1.04755	0.935652	-1.19853	411	3.44505	0.991642	0.000497465	0.00662435	1	3.64432	4.18389	2.50695
PG2455	Q3V2C6;Q3V1K9;P31001	Desmin	Des	0.613662	2.6099			412	-3.32415	0.00363372	0.000497575	0.00662435	1	-3.44537	-3.20293
PG6301	Q9Z2X2;A2AG83	26S proteasome non-ATPase regulatory subunit 10	Psmd10	-0.421176	-0.904805	0.60584	-1.04579	413	2.88762	0.972929	0.000497947	0.00662435	1	3.15055	3.39005	2.12225
PG1594	E9QJU8;Q8CG79	Apoptosis-stimulating of p53 protein 2	Trp53bp2;Tp53bp2	0.261323	-0.524618	-0.253242	-0.637686	414	2.10214	0.909884	0.000500053	0.00662435	1	2.52566	1.98765	1.79311
PG4117	Q61033	Lamina-associated polypeptide 2, isoforms alpha/zeta	Tmpo	0.066775	-0.182139	-0.0441602	-0.204215	415	1.65355	0.832485	0.000500272	0.00662435	1	1.76496	1.62993	1.56575
PG2490	P35505;D3Z2R9	Fumarylacetoacetase	Fah	0.503896	0.0645476	-0.59463	0.0610537	416	-2.06496	0.0350654	0.000500677	0.00662435	1	-1.85258	-2.48431	-1.858
PG5635	Q9CQU0	Thioredoxin domain-containing protein 12	Txndc12	-0.272721	0.489486	0.314824	0.642434	417	2.21631	0.922783	0.000503512	0.00664588	1	1.73938	2.33732	2.57222
PG3481	Q3U0S4;Q7TSG2	RNA polymerase II subunit A C-terminal domain phosphatase	Ctdp1	0.126054	-0.0937021	-0.123176	-0.10119	418	1.63758	0.828852	0.000510127	0.00669152	1	1.7302	1.54993	1.6326
PG2872	Q561N4;P68037;Q3TIH9;D3YZS3	Ubiquitin-conjugating enzyme E2 L3	Ube2l3	-0.765487	0.381931	0.921827	0.55136	419	2.73899	0.962936	0.000510339	0.00669152	1	2.04751	3.27395	2.89551
PG2351	Q3UHT6;P19096;A0A0U1RNJ1;Q3TB22	Fatty acid synthase;[Acyl-carrier-protein] S-acetyltransferase;[Acyl-carrier-protein] S-malonyltransferase;3-oxoacyl-[acyl-carrier-protein] synthase;3-oxoacyl-[acyl-carrier-protein] reductase;3-hydroxyacyl-[acyl-carrier-protein] dehydratase;Enoyl-[acyl-carrier-protein] reductase;Oleoyl-[acyl-carrier-protein] hydrolase	Fasn	-0.157838	0.0189606	0.212663	0.0592938	420	1.66614	0.834666	0.000511951	0.00669152	1	1.532	1.78406	1.68236
PG6283	Q9Z247	Peptidyl-prolyl cis-trans isomerase FKBP9	Fkbp9	-0.0721608	0.245776	0.0905969	0.32892	421	-1.77618	0.0512355	0.000513633	0.00669152	1	-1.99595	-1.76946	-1.56312
PG3160	Q3KNM9;Q9DCZ4-2;Q9DCZ4;Q9DCZ4-3	Apolipoprotein O	Apoo	0.364494	-0.486871	-0.381541	-0.600048	422	2.13284	0.913336	0.000513808	0.00669152	1	2.59229	1.92881	1.87743
PG0225	A0A0R4J085;Q3UHZ7;Q3TAD4;Q91YN5-3;Q91YN5;A0A0R4J1F6;Q91YN5-2	UDP-N-acetylhexosamine pyrophosphorylase;UDP-N-acetylgalactosamine pyrophosphorylase;UDP-N-acetylglucosamine pyrophosphorylase	Uap1	-0.298587	0.266387	0.363954	0.372474	423	-1.94351	0.0412427	0.000514264	0.00669152	1	-2.30325	-1.75979	-1.76751
PG2377	Q4QRK2;Q8C3V7;Q544X6;Q3UC49;P22315;Q91W09	Ferrochelatase;Ferrochelatase, mitochondrial	Fech	0.313762	0.177686	-0.372698	0.21449	424	1.86422	0.871911	0.00051822	0.00669886	1	1.90247	1.57545	2.11474
PG0191	A0A0N4SW73;Q6ZQ33;Q8R361	Rab11 family-interacting protein 5	Rab11fip5	-0.265692	0.13917	0.334105	0.21466	425	1.80202	0.85992	0.000518289	0.00669886	1	1.536	1.98344	1.88661
PG3460	Q3TYA4;Q8R3T5;D6RJ81;B8JJ84	Syntaxin-binding protein 6	Stxbp6	-1.74133	1.86473			426	3.17718	0.983103	0.00051848	0.00669886	1		3.15319	3.20117
PG4910	Q8CCK0;Q8BP16;A0PJB8	Core histone macro-H2A.2;Core histone macro-H2A	H2afy2	0.279037	-0.103629	-0.308186	-0.125741	427	1.74281	0.851562	0.000520542	0.00670974	1	1.92763	1.53481	1.76598
PG5011	Q8K0M3;Q9R1Z8	Vinexin	Sorbs3	-0.21847	-0.219502	0.305235	-0.226573	428	1.74178	0.851017	0.000524609	0.00671371	1	1.71429	1.95308	1.55796
PG2300	Q6PAC1;P13020-2;Q3UCW8;Q3U9Q8;Q3TGJ9;P13020;A0A0J9YUQ8	Gelsolin	Gsn	-0.310881	0.44719	0.364528	0.59396	429	2.16423	0.916606	0.000526227	0.00671371	1	1.69075	2.32369	2.47823
PG4414	Q78T54-2;Q78T54	Vacuolar ATPase assembly integral membrane protein Vma21	Vma21	0.376074	0.0253169	-0.436277	0.0236111	430	-1.85144	0.0483285	0.000526528	0.00671371	1	-1.68802	-2.16127	-1.70503
PG5121	Q8R1T1;Q8R1T1-2	Charged multivesicular body protein 7	Chmp7	-0.272287	-0.110122	0.361911	-0.0888083	431	1.74279	0.851381	0.000529577	0.00671371	1	1.62031	1.97647	1.63158
PG2142	Q0VGQ1;O70503;O70503-2	Very-long-chain 3-oxoacyl-CoA reductase	Hsd17b12	-0.530921	0.575235	0.621597	0.768007	432	2.59026	0.95367	0.000530032	0.00671371	1	1.91697	2.90139	2.95243
PG4406	Q76N33;D3Z0S7;Q3UUR8	AMSH-like protease	Stambpl1	0.217729	0.435501	-0.276538	0.536702	433	2.06027	0.904433	0.000531686	0.00671371	1	1.89203	1.79963	2.48917
PG4912	Q8CCS6;G3UY42;Q8CCS6-2;D3Z5F7;D3YUB9;G3UWS5;D3Z055	Polyadenylate-binding protein 2	Pabpn1;Gm20521	-0.476084	-0.0172135	0.602044	0.0410698	434	1.99428	0.895349	0.000531937	0.00671371	1	1.70191	2.37327	1.90766
PG2235	Q543M3;Q3UHZ4;Q3U5U9;Q3TT75;P06797;Q3UWH6;Q9D0C0;Q3TVJ1;Q3TNC8	Cathepsin L1;Cathepsin L1 heavy chain;Cathepsin L1 light chain	Ctsl	0.190204	0.323143	-0.234187	0.401923	435	1.8918	0.877544	0.00053519	0.00671371	1	1.77439	1.67432	2.22668
PG2968	P97329	Kinesin-like protein KIF20A	Kif20a	-0.0311838	-0.353737	0.0884366	-0.405505	436	1.7555	0.853561	0.00053608	0.00671371	1	1.913	1.84248	1.51101
PG5217	Q8VDD5;Q3UFT0	Myosin-9	Myh9	-0.222739	-0.0728577	0.298775	-0.0473968	437	1.68692	0.840116	0.000536395	0.00671371	1	1.57039	1.874	1.61637
PG5952	Q9DB29	Isoamyl acetate-hydrolyzing esterase 1 homolog	Iah1	0.233086	-0.7611	-0.20017	-0.923772	438	2.42267	0.942042	0.000538779	0.00671371	1	2.96994	2.37531	1.92274
PG3062	Q3UC70;Q3U7P6;Q05915	GTP cyclohydrolase 1	Gch1	2.51044	0.484251			439	3.15228	0.98274	0.000539025	0.00671371	1	3.19837		3.1062
PG4258	Q6NSQ7	Protein LTV1 homolog	Ltv1	-0.253527	0.208672	0.313812	0.298427	440	1.82624	0.864281	0.000539445	0.00671371	1	1.52603	1.98484	1.96784
PG5425	Q922Q8;Q3TF84	Leucine-rich repeat-containing protein 59	Lrrc59	0.0584749	-0.059054	-0.0438537	-0.0534403	441	-1.59002	0.0635901	0.0005401	0.00671371	1	-1.556	-1.63021	-1.58385
PG1263	D3Z3A0;Q9DCL8;Q8BVM6;Q9CT86	Protein phosphatase inhibitor 2	Ppp1r2	-1.85462	1.76455			442	3.18432	0.984012	0.000541163	0.00671371	1		3.26735	3.1013
PG0608	A2ALW5;A2ALW5-2	DnaJ homolog subfamily C member 25	Dnajc25	2.49316	0.668646			443	3.18371	0.98383	0.00054154	0.00671371	1	3.10064		3.26678
PG5362	Q91YJ3;Q8BJZ7	Thymocyte nuclear protein 1	Thyn1	-0.424906	-0.0780345	0.544717	-0.0372633	444	1.91056	0.882086	0.000542667	0.00671371	1	1.68299	2.26012	1.78855
PG6246	Q9WVA4;A0A0A6YXG6	Transgelin-2	Tagln2	-0.465802	-0.0704898	0.593786	-0.0247359	445	-1.96831	0.0397892	0.000542806	0.00671371	1	-2.22341	-1.58749	-2.09403
PG2090	Q2VPC9;Q3TWR3;O54950	5-AMP-activated protein kinase subunit gamma-1	Prkag1	-0.0676218	-0.520853	0.145961	-0.606335	446	1.96372	0.890807	0.000545096	0.00672643	1	2.19938	2.11132	1.58047
PG5423	Q922Q1	Mitochondrial amidoxime reducing component 2	2002-03-01	0.287278	-0.35816	-0.297982	-0.436806	447	1.8822	0.875727	0.000546843	0.00672643	1	2.22204	1.7156	1.70897
PG5525	Q99LZ3	DNA replication complex GINS protein SLD5;DNA replication complex GINS protein SLD5, N-terminally processed	Gins4	-0.847032	-0.162202	1.06407	-0.105564	448	2.64874	0.957485	0.0005475	0.00672643	1	2.23267	3.35142	2.36213
PG0956	B2RXP1;E9QAU9;Q8BVU0;B7ZWM8;E9Q892	Leucine-rich repeat and calponin homology domain-containing protein 3	Lrch3	0.0220815	-0.28787	0.0185158	-0.329516	449	1.68132	0.837936	0.000549407	0.00673482	1	1.82997	1.71333	1.50065
PG1647	Q2I0J8;Q2I0J7;E9QPU1;Q8CIZ8;Q3TPE1;Q3TD35;Q3U017;Q8CIZ8-2	von Willebrand factor;von Willebrand antigen 2	Vwf	-2.45399	-0.739241			450	-3.14291	0.00490552	0.000553965	0.00677561	1	-3.07736		-3.20846
PG1634	E9QNP0;Q5M9K3;E9Q4P0;P62984;A5JUZ1;A0A0A6YW67;E9Q9J0;Q8C2K3;E9Q5F6;Q922B0;Q5SX22;Q3TH47;Q78XY9;Q8R0Z9;Q922Z8;Q8VC46;P0CG49;P0CG50;B0LAC2	Ubiquitin-60S ribosomal protein L40;Ubiquitin;60S ribosomal protein L40;Polyubiquitin-B;Ubiquitin;Polyubiquitin-C;Ubiquitin;Ubiquitin-related 1;Ubiquitin-related 2	Kxd1;Uba52;Ubc;Gm8797;Gm1821;Ubb	1.31161	0.519173	-1.6117	0.54975	451	3.83778	0.997456	0.000556849	0.00678617	1	4.23744	2.68744	4.58847
PG4444	Q7TNP6		Cars	2.45348	0.560505			452	3.10558	0.98165	0.000558142	0.00678617	1	3.09005		3.12112
PG5601	Q9CQ91;D3Z670	NADH dehydrogenase [ubiquinone] 1 alpha subcomplex subunit 3	Ndufa3	-1.6617	1.96503			453	3.19865	0.984738	0.000558527	0.00678617	1		3.08499	3.31232
PG1919	Q8N7N6;Q8C0E5;I7GPR1;I7GPT0		Traf3ip2	0.13051	-0.121754	-0.126361	-0.135761	454	1.60824	0.824128	0.000562054	0.00679954	1	1.71995	1.52231	1.58244
PG3311	Q3TJD7;Q8BVJ7	PDZ and LIM domain protein 7	Pdlim7	0.0907831	-0.282224	-0.0653704	-0.328219	455	1.67969	0.837209	0.000562484	0.00679954	1	1.86377	1.65575	1.51953
PG2472	Q3UG07;P33434-2;P33434	72 kDa type IV collagenase;PEX	Mmp2	0.414084	-0.137607	-0.469501	-0.178163	456	-1.87199	0.0476017	0.000564267	0.00679954	1	-1.59088	-2.18148	-1.84362
PG5529	Q99M51;Q8BMV0;Q8BZ27;Q8BH99	Cytoplasmic protein NCK1	Nck1	0.39703	-0.381919	-0.429389	-0.474708	457	2.0056	0.896802	0.000564569	0.00679954	1	2.42141	1.75579	1.8396
PG5496	Q99L04;Q3TVU9	Dehydrogenase/reductase SDR family member 1	Dhrs1	0.0791048	-0.0355146	-0.0707777	-0.0264129	458	1.57696	0.818496	0.000567133	0.00681209	1	1.60872	1.51585	1.60631
PG4373	Q6ZPT2;Q7TSZ3;Q8BMJ2	Leucine--tRNA ligase, cytoplasmic	Lars	0.00587298	-0.169741	0.0288206	-0.184141	459	1.59026	0.820676	0.000570557	0.00681209	1	1.65998	1.61296	1.49784
PG1753	F8WIE5;Q69ZR2	E3 ubiquitin-protein ligase HECTD1	Hectd1	-0.153552	-0.329331	0.235115	-0.365788	460	1.74733	0.852471	0.000570664	0.00681209	1	1.82135	1.92748	1.49316
PG1754	Q5PR81;Q0VGT1;F8WIG5;Q9Z207;Q3TSX1;Q3UU77;Q5DTM7;Q3UVP0;Q8K331	Protein diaphanous homolog 3	Diap3;Diaph3	-0.129288	-0.347728	0.207107	-0.390196	461	1.75131	0.853198	0.000572696	0.00681209	1	1.84989	1.91554	1.48849
PG1639	E9QNY8;Q9JLC8-3;Q9JLC8;Q9JLC8-2	Sacsin	Sacs	-0.220254	0.121802	0.2803	0.189784	462	1.70911	0.845203	0.000574164	0.00681209	1	1.479	1.85751	1.79083
PG5980	Q9DBT3;A0A0U1RP69	Coiled-coil domain-containing protein 97	Ccdc97	-0.285822	0.570164	0.324329	0.741885	463	2.28176	0.930233	0.000574705	0.00681209	1	1.74979	2.39803	2.69747
PG0804	B1AU25;Q9Z0X1	Apoptosis-inducing factor 1, mitochondrial	Aifm1	-0.0562385	-0.140221	0.101911	-0.14309	464	-1.58335	0.0643169	0.000575084	0.00681209	1	-1.56612	-1.5166	-1.66734
PG5414	Q922D8;Q3TW74;Q3UZH3;Q8BXX7	C-1-tetrahydrofolate synthase, cytoplasmic;Methylenetetrahydrofolate dehydrogenase;Methenyltetrahydrofolate cyclohydrolase;Formyltetrahydrofolate synthetase;C-1-tetrahydrofolate synthase, cytoplasmic, N-terminally processed	Mthfd1	-0.162256	-0.0502784	0.223526	-0.0247822	465	1.61432	0.824855	0.000575513	0.00681209	1	1.51859	1.74882	1.57555
PG6062	Q9ERD7;Q9CRT0	Tubulin beta-3 chain	Tubb3	-0.775224	-2.45807			466	3.08813	0.981105	0.000578623	0.00683421	1	3.03944	3.13683
PG3248	Q3V3U0;Q3TFQ8;Q8CI94;Q3UYH9;Q3UGT5;Q3UZL2	Alpha-1,4 glucan phosphorylase;Glycogen phosphorylase, brain form	Pygb	-0.119541	0.129356	0.157385	0.190803	467	-1.64411	0.059593	0.000583891	0.0068656	1	-1.82185	-1.5776	-1.53289
PG5671	Q9CRA5;Q3TIL4;Q05BZ0;Q3UWP6	Golgi phosphoprotein 3	Golph3	0.113299	-0.280165	-0.0928797	-0.32754	468	-1.67064	0.0570494	0.000584207	0.0068656	1	-1.47506	-1.71296	-1.82391
PG0681	F6QYT9;A2CG49-2;A2CG49;A2CG49-7;D3Z560;A0A0A0MQF1;A2CG49-10;A2CG49-5;A2CG49-9;A2CG49-8;B1B1A7	Kalirin	Kalrn	-0.0217241	-0.314991	0.0738711	-0.359025	469	1.68018	0.837391	0.000586179	0.0068656	1	1.82013	1.7523	1.4681
PG3324	Q3TKN7;Q8JZY2	COMM domain-containing protein 10	Commd10	-0.620302	-0.180274	0.790144	-0.146046	470	2.1984	0.920967	0.00058627	0.0068656	1	1.92096	2.72334	1.95089
PG4704	Q8BNE1-2;Q8BNE1;Q8BNE1-3	TRPM8 channel-associated factor 1	Tcaf1	-0.438582	-0.129254	0.565395	-0.0986115	471	-1.90164	0.0446948	0.000587769	0.00686854	1	-2.10666	-1.53149	-2.06676
PG0422	A0A1D5RLG0;Q8BTX9	Inactive hydroxysteroid dehydrogenase-like protein 1	Hsdl1	-0.0267713	-0.494139	0.0942266	-0.577081	472	1.88334	0.876272	0.000590128	0.0068815	1	2.12627	1.99327	1.53049
PG1237	D3Z2Q2;D3Z079;Q8K400	Syntaxin-binding protein 5	Stxbp5	0.392984	-0.0822951	-0.448268	-0.108995	473	1.81396	0.862282	0.000591567	0.00688369	1	2.05049	1.5109	1.88048
PG0015	A0A068EW80;Q60953;D3Z3A6;D3YXR5;Q60953-2;F7BTZ2	Protein PML	Pml	0.213594	-0.283123	-0.214453	-0.339306	474	1.71597	0.846112	0.000601463	0.00698168	1	1.9699	1.59409	1.58393
PG2986	Q3UP74;P97449;Q3TB69	Aminopeptidase N	Anpep	-0.266511	0.157596	0.333637	0.237197	475	1.75154	0.853379	0.000602525	0.00698168	1	1.47418	1.93015	1.8503
PG0041	Q4FK85;Q3U607;A0A087WQT6;O89110	Caspase-8;Caspase-8 subunit p18;Caspase-8 subunit p10	Casp8	0.397247	0.13693	-0.470854	0.157998	476	-1.86296	0.0477834	0.000605331	0.00699329	1	-1.75352	-2.21074	-1.62461
PG0687	A2RS22;Q9WUM3	Coronin;Coronin-1B	Coro1b	0.0110792	0.126818	-0.00105154	0.177082	477	1.59949	0.823219	0.000606068	0.00699329	1	1.49696	1.56213	1.73937
PG4594	Q8BGU5;Q8BGU5-2	Cyclin-Y	Ccny	-0.0115034	0.0730286	0.0306463	0.113324	478	1.56927	0.816497	0.000608509	0.00700167	1	1.48577	1.56009	1.66194
PG1403	E9PWE8;Q3TT92;Q62188;Q3TAS8	Dihydropyrimidinase-related protein 3	Dpysl3	-0.322509	0.28454	0.391565	0.396558	479	1.908	0.881541	0.000609339	0.00700167	1	1.52404	2.10741	2.09253
PG3136	Q6P5E5;Q1HL32;Q9CW03;Q6PIE1;Q3UNU2;Q6PFZ4	Structural maintenance of chromosomes protein;Structural maintenance of chromosomes protein 3	Smc3	-0.0233259	-0.0888469	0.0578588	-0.0831175	480	1.54159	0.809775	0.000613607	0.00701431	1	1.54705	1.57236	1.50535
PG2757	Q6ZWR0;P61226;Q80ZJ1-2;Q80ZJ1	Ras-related protein Rap-2b;Ras-related protein Rap-2a	Rap2b;Rap2a	-0.0593781	-0.061938	0.0995073	-0.0473699	481	-1.54557	0.0663154	0.000613736	0.00701431	1	-1.57635	-1.49106	-1.56929
PG5983	Q9DBX1	Regulator of cell cycle RGCC	Rgcc	2.73151	0.279348			482	3.35927	0.988917	0.000614262	0.00701431	1	3.58217		3.13638
PG4920	Q8CDM8;Q8CDM8-2	Protein FAM160B1	Fam160b1	-0.129167	-0.563654	0.224106	-0.653523	483	1.98706	0.893532	0.000616807	0.0070288	1	2.21326	2.19189	1.55601
PG2355	Q3TWG9;P19324;Q8BVU9;Q3TMD2;Q3TJK3;Q8BV87	Serpin H1	Serpinh1	-0.139115	-0.058787	0.196097	-0.0370407	484	-1.57156	0.0648619	0.000622142	0.0070684	1	-1.64921	-1.45395	-1.61154
PG3709	Q3UIR2;Q9D902;Q9CWC4	General transcription factor IIE subunit 2	Gtf2e2	0.597669	-0.118204	-0.694006	-0.169436	485	2.09294	0.907158	0.000622851	0.0070684	1	2.4662	1.63313	2.1795
PG1835	G3X9J0;S4R1S0;Q6A050;S4R2N4;Q4VBF3		Sipa1l3	-0.23182	0.257085	0.283604	0.355699	486	1.78737	0.858467	0.000628213	0.00708971	1	1.47081	1.9195	1.97178
PG5588	Q9CQ45	Neudesin	Nenf	-0.700377	-0.274806	0.894902	-0.254812	487	2.33838	0.934775	0.000629732	0.00708971	1	2.0716	2.94512	1.99843
PG4781	Q8BX02;Q8BX02-2	KN motif and ankyrin repeat domain-containing protein 2	Kank2	0.105938	-0.112511	-0.097253	-0.122491	488	1.55245	0.81359	0.000630821	0.00708971	1	1.64484	1.48442	1.5281
PG4816	Q8C0S1;Q8C0S1-2	DIS3-like exonuclease 1	Dis3l	0.178271	-0.0331027	-0.191406	-0.0315388	489	1.57913	0.819041	0.000635869	0.00708971	1	1.66543	1.43834	1.63362
PG0748	A6PW47;Q99K74;Q99K74-3;Q99K74-2	Mediator of RNA polymerase II transcription subunit 24	Med24	-0.459326	-0.424187	0.614008	-0.456587	490	2.08112	0.906068	0.000636221	0.00708971	1	2.03861	2.52343	1.68131
PG0869	B2RR26;Q8BZW8;Q9CW64;Q8C1S8	NHL repeat-containing protein 2	Nhlrc2	0.0408657	-0.00964738	-0.0263906	0.00824236	491	1.52815	0.805233	0.000638651	0.00708971	1	1.52305	1.49271	1.56869
PG5743	Q9CYA0	Cysteine-rich with EGF-like domain protein 2	Creld2	0.487021	-0.0631594	-0.563995	-0.0933091	492	-1.90545	0.0443314	0.000638777	0.00708971	1	-1.62716	-2.28724	-1.80196
PG5643	Q9CQW1	Synaptobrevin homolog YKT6	Ykt6	0.0365009	-0.0331273	-0.0192252	-0.0200358	493	-1.52483	0.0677689	0.000639075	0.00708971	1	-1.51852	-1.55235	-1.50361
PG5354	Q91XU3	Phosphatidylinositol 5-phosphate 4-kinase type-2 gamma	Pip4k2c	-0.121317	0.0222366	0.168047	0.0603177	494	1.56005	0.815225	0.00064286	0.00708971	1	1.44459	1.64817	1.58739
PG5793	Q9D0C4;Q9D0C4-2	tRNA (guanine(37)-N1)-methyltransferase	Trmt5	-0.135266	-0.00104502	0.186838	0.0330611	495	1.5608	0.815407	0.000644477	0.00708971	1	1.45122	1.66446	1.56673
PG4047	Q5SQX6;Q6PGK0	Cytoplasmic FMR1-interacting protein 2	Cyfip2	0.994671	-0.416079	-1.15251	-0.564984	496	2.92635	0.974564	0.000644917	0.00708971	1	3.69962	2.20552	2.87392
PG2578	Q3UMK5;Q3UMA0;P48755;Q7TMU4	Fos-related antigen 1	Fosl1	-0.837041	-2.40328			497	3.04584	0.979833	0.0006453	0.00708971	1	2.94399	3.1477
PG2414	P26883;Q3ULN5;Q3UBA0;Q3UKJ3;F6X9I3	Peptidyl-prolyl cis-trans isomerase FKBP1A;Peptidyl-prolyl cis-trans isomerase	Fkbp1a	0.205168	-0.0601181	-0.221927	-0.0666714	498	-1.59066	0.0634084	0.000645814	0.00708971	1	-1.47322	-1.74784	-1.55091
PG5647	Q9CQX8;Q9D6T9	28S ribosomal protein S36, mitochondrial	Mrps36	-0.142235	-0.910169	0.267493	-1.07503	499	2.55084	0.9504	0.000647174	0.00708971	1	2.97437	2.83143	1.84672
PG2711	P58501	PAX3- and PAX7-binding protein 1	Paxbp1	-0.2634	-0.0677811	0.347755	-0.0378981	500	1.64776	0.831032	0.000647672	0.00708971	1	1.50528	1.86636	1.57162
PG3094	Q0PD20;Q3TV85;Q64008;B1AQD3;B1AQD4;F7BE32	Ras-related protein Rab-34	Rab34	0.301138	-0.793327	-0.28026	-0.96861	501	2.41549	0.941679	0.000648071	0.00708971	1	3.02021	2.31984	1.90641
PG5488	Q99KQ4;Q3TLX1	Nicotinamide phosphoribosyltransferase	Nampt	0.0902006	0.0908583	-0.0942885	0.126793	502	1.56465	0.81577	0.000651324	0.00708971	1	1.52802	1.47085	1.69507
PG0284	A0A0R4J0Z1;P08003	Protein disulfide-isomerase A4	Pdia4	-0.0267422	0.246044	0.035415	0.325551	503	-1.66976	0.0572311	0.000652542	0.00708971	1	-1.86405	-1.69938	-1.44584
PG1811	G3X8R5;Q3UA37;Q922W2;Q8BUN3	Glutamine-rich protein 1	Qrich1	0.711755	0.522617	-0.883448	0.602749	504	2.62347	0.955669	0.000656875	0.00708971	1	2.68257	1.95172	3.23613
PG6085	Q9JHI5	Isovaleryl-CoA dehydrogenase, mitochondrial	Ivd	-0.0386454	-0.436126	0.104041	-0.505369	505	-1.76401	0.0517805	0.000657109	0.00708971	1	-1.56206	-1.65554	-2.07445
PG2066	Q3U9X2;Q9ES84;O35901;O35900;Q9EP83	U6 snRNA-associated Sm-like protein LSm2	Lsm2	0.3351	-0.450583	-0.348723	-0.553404	506	1.94085	0.888081	0.000657457	0.00708971	1	2.36228	1.75347	1.70682
PG3396	Q3TT41		Ncl	-2.32275	-0.642259			507	-2.95822	0.00708576	0.000657821	0.00708971	1	-2.93745		-2.97898
PG5996	Q9DC51;Q3TJH1	Guanine nucleotide-binding protein G(k) subunit alpha	Gnai3	-0.291335	-0.0163508	0.377598	0.0270924	508	-1.66968	0.0574128	0.000658387	0.00708971	1	-1.8583	-1.43845	-1.71229
PG0425	A0A1D5RLR3;B2RUP0;Q8C5L7;Q8C545	RNA-binding protein 34	Rbm34	-0.213489	0.399522	0.250031	0.527906	509	1.91539	0.882812	0.000658883	0.00708971	1	1.52503	2.00603	2.21509
PG3033	Q3TX57;Q3TU64;Q01149;Q3TUE2;Q3TP88	Collagen alpha-2(I) chain	Col1a2	0.173805	-0.185219	-0.173903	-0.216677	510	-1.59308	0.0628634	0.000659934	0.00708971	1	-1.41944	-1.70162	-1.65817
PG3810	Q3UV17	Keratin, type II cytoskeletal 2 oral	Krt76	-2.09867	1.70225			511	3.33571	0.988372	0.000660305	0.00708971	1		3.57499	3.09643
PG0020	A0A087WQE6;A0A087WNT1;P83940;A0A087WPE4	Transcription elongation factor B polypeptide 1	Tceb1	-0.314187	-1.28431	0.506037	-1.51729	512	3.34238	0.988735	0.000661467	0.00708971	1	3.88988	3.83087	2.30639
PG5520	Q99LS3;D3Z4T3;A0A0J9YVH9;D3Z666	Phosphoserine phosphatase	Psph	-0.142404	0.212091	0.178582	0.293556	513	1.66809	0.835574	0.000661871	0.00708971	1	1.42857	1.73727	1.83842
PG0251	A0A0R4J0K1;Q9ERR7	15 kDa selenoprotein	Selenof	-1.76918	1.65114			514	3.0115	0.978016	0.000662084	0.00708971	1		3.10526	2.91775
PG0206	A8CVP4;A0A0R4J005;A8CVP1;Q4ZJB3;E9QP62;Q99JW4;Q9D7B2	LIM and senescent cell antigen-like-containing domain protein 1	Lims1	-0.289907	-0.0244892	0.37651	0.0170517	515	1.66297	0.834484	0.000665833	0.0070923	1	1.47996	1.89459	1.61435
PG0272	A0A0R4J0T7;Q01721;Q7TNT6	Growth arrest-specific protein 1	Gas1	0.433456	-0.25606	-0.483622	-0.324189	516	-1.87476	0.0470567	0.000666775	0.0070923	1	-1.51274	-2.17739	-1.93414
PG4515	Q80X72;Q9D3K0	Leucine-rich repeat-containing protein 15	Lrrc15	-0.0881275	1.06881	0.0446327	1.33389	517	3.02557	0.979106	0.000667521	0.0070923	1	2.3106	2.8899	3.87621
PG5957	Q9DB73;G3UZG6	NADH-cytochrome b5 reductase 1	Cyb5r1	-0.405534	0.234997	0.496334	0.342895	518	1.91174	0.882631	0.000669399	0.0070923	1	1.5102	2.18683	2.0382
PG4450	Q7TPR4	Alpha-actinin-1	Actn1	-0.237105	0.131312	0.30001	0.202752	519	1.66633	0.834847	0.000669941	0.0070923	1	1.42109	1.8264	1.7515
PG2341	P17751;H7BXC3	Triosephosphate isomerase	Tpi1	-0.0424096	-0.0263803	0.0760756	-0.00538853	520	1.51062	0.801599	0.000670658	0.0070923	1	1.46841	1.54487	1.51859
PG2181	Q3TGH8;O88811;O88811-2	Signal transducing adapter molecule 2	Stam2	0.342363	-0.0742328	-0.387429	-0.0950449	521	1.70058	0.843568	0.000671868	0.0070923	1	1.90378	1.43644	1.76151
PG4319	Q6PAV2-2;Q6PAV2	Probable E3 ubiquitin-protein ligase HERC4	Herc4	0.36509	0.241373	-0.440093	0.28798	522	1.85466	0.869004	0.000672634	0.0070923	1	1.88426	1.51288	2.16685
PG3635	Q8BU29;Q3UDF3;Q99KK7;Q6NXZ0;Q3UDD5;Q3THP1;Q3UDY7;Q8BYF3	Dipeptidyl peptidase 3	Dpp3	-0.0892864	-0.16411	0.143944	-0.169533	523	1.54243	0.809956	0.000674347	0.00709676	1	1.55513	1.6401	1.43208
PG0547	A4FUW1;A2ACM0;Q8K4Q0;Q6ZPU3;E9PXZ5;Q8K4Q0-4	Regulatory-associated protein of mTOR	Rptor	0.173052	-0.0231953	-0.185855	-0.0190324	524	1.55236	0.813227	0.000678875	0.00711921	1	1.62986	1.41387	1.61335
PG3566	Q3U661;Q6A006;Q8BU11;H3BL89;Q80W03	TOX high mobility group box family member 4;TOX high mobility group box family member 3	Tox4;Tox3	-0.27576	-0.0186704	0.358866	0.0229966	525	1.64208	0.82976	0.000679067	0.00711921	1	1.46362	1.8613	1.60131
PG5684	Q9CU62;A0JLM6	Structural maintenance of chromosomes protein 1A	Smc1a	-0.213312	-0.180978	0.295912	-0.180014	526	1.61059	0.824491	0.000687246	0.0071839	1	1.56325	1.81051	1.458
PG2092	O54962	Barrier-to-autointegration factor;Barrier-to-autointegration factor, N-terminally processed	Banf1	-0.770929	-0.482428	0.997074	-0.502262	527	2.55858	0.95149	0.000687848	0.0071839	1	2.37463	3.26082	2.0403
PG5220	Q8VDG5	Phosphopantothenate--cysteine ligase	Ppcs	0.153874	-0.0577796	-0.159817	-0.0596471	528	1.53426	0.807049	0.000690176	0.00719456	1	1.62137	1.41761	1.5638
PG4982	Q9CVM2;Q8CJ26;A0A0G2JH13	Death domain-containing membrane protein NRADD	Nradd	-0.219366	0.111049	0.280075	0.176599	529	-1.62648	0.0610465	0.000695175	0.00720714	1	-1.84974	-1.47676	-1.55293
PG1239	D3Z0I5;Q922Y2	Tripartite motif-containing protein 59	Trim59	0.306473	0.00938741	-0.350481	0.0098476	530	1.65391	0.832667	0.000696382	0.00720714	1	1.78746	1.40269	1.77158
PG5840	Q9D1Q1	M-phase phosphoprotein 6	Mphosph6	-1.55376	1.79923			531	2.96035	0.976381	0.000696611	0.00720714	1		2.87113	3.04957
PG5772	Q9CZJ1;Q9D948	Probable U3 small nucleolar RNA-associated protein 11	Utp11l	0.563188	-0.22211	-0.643877	-0.293342	532	2.01722	0.898438	0.000696621	0.00720714	1	2.4324	1.60454	2.01472
PG0476	E9PYF4;A0T1J8;F6VG99;Q6ZQ32;E9PYI7		Lmo7	-0.237735	0.0711232	0.305555	0.129404	533	1.61811	0.8254	0.000702682	0.00725621	1	1.40807	1.79003	1.65623
PG3623	Q3UKS0;Q3UC67;Q8JZR0	Long-chain-fatty-acid--CoA ligase 5	Acsl5	-0.127945	0.411773	0.145166	0.535887	534	1.85656	0.869913	0.000705354	0.00725902	1	1.50725	1.87655	2.18588
PG1139	Q99KV4;D0EW11;Q8K5B2;D3Z6A4;D3Z1G3	Multiple coagulation factor deficiency protein 2 homolog	Mcfd2	0.14935	-1.08402	-0.0728315	-1.31075	535	2.82485	0.968205	0.00070563	0.00725902	1	3.51562	2.90526	2.05366
PG4288	Q6P549;A0A087WPT7	Phosphatidylinositol 3,4,5-trisphosphate 5-phosphatase 2	Inppl1	-0.107825	-0.441836	0.188513	-0.506705	536	1.75733	0.854106	0.00070691	0.00725902	1	1.92362	1.92216	1.42622
PG3846	Q923E8;Q3UZN6;Q9DBX2;A2AVP3	Phosducin-like protein	Pdcl	0.180165	0.00200869	-0.196494	0.0111246	537	1.5442	0.810501	0.000708883	0.00726572	1	1.61082	1.39528	1.62649
PG4301	Q6P9J9	Anoctamin-6	Ano6	-0.0460606	0.0998942	0.0704825	0.148897	538	-1.52811	0.0675872	0.000713331	0.0072887	1	-1.64698	-1.51475	-1.42261
PG3217	Q3TDI5;Q8VCI5;Q8VCI5-2	Peroxisomal biogenesis factor 19	Pex19	0.667447	0.0143983	-0.789281	-0.0134072	539	2.13882	0.914244	0.000713773	0.0072887	1	2.47312	1.59826	2.34507
PG5880	Q9D6K9;H3BJH5;Q3UK15;H3BJ49;H3BJQ0;Q9D6K9-2	Ceramide synthase 5	Cers5	-0.127813	-0.413053	0.210503	-0.469979	540	1.72704	0.847929	0.000715692	0.00729475	1	1.86504	1.9024	1.41367
PG0313	A0A0R4J1N9;Q3TSW9;P40630-2;P40630;D3Z0F3	Transcription factor A, mitochondrial	Tfam	-0.0719674	-0.799243	0.173345	-0.945472	541	2.27306	0.929142	0.000718679	0.00731166	1	2.67071	2.4766	1.67185
PG2510	P38647	Stress-70 protein, mitochondrial	Hspa9	0.0359177	-0.113412	-0.0121417	-0.117893	542	1.48761	0.797783	0.000721361	0.00732426	1	1.54101	1.47569	1.44613
PG3530	Q3U3X7;Q3TU94;Q5SU71;Q61510;Q922N9	E3 ubiquitin/ISG15 ligase TRIM25	Trim25	-0.237689	0.590093	0.264289	0.762272	543	2.15928	0.916243	0.000722578	0.00732426	1	1.64269	2.23333	2.6018
PG2639	Q4FJM3;Q3V1E0;P52800	Ephrin-B2	Efnb2	-0.0518442	-0.0529772	0.0896459	-0.0370553	544	1.484	0.797238	0.000724049	0.00732567	1	1.45217	1.5308	1.46902
PG3708	Q3UIP2;Q61398;D3YUE2;Q3UN82;Q3TX39;D3YZE3	Procollagen C-endopeptidase enhancer 1	Pcolce	0.278233	-0.260687	-0.294738	-0.317204	545	-1.67332	0.0568677	0.000729033	0.00735982	1	-1.39616	-1.85107	-1.77272
PG3329	Q6XLQ8;Q3TL33;G3V004		Calu	-0.0987874	1.18227	0.0485695	1.47312	546	3.18999	0.984557	0.000730098	0.00735982	1	2.40198	3.04145	4.12654
PG2343	Q3TU85;Q61696;P17879;Q3TAI8;A1E2B8	Heat shock 70 kDa protein 1A;Heat shock 70 kDa protein 1B	Hspa1b;Hspa1a	0.225145	-0.467997	-0.213801	-0.565695	547	-1.82462	0.0492369	0.000733576	0.00738136	1	-1.45496	-1.92088	-2.09801
PG1874	G5E8R2		Tpm1	0.12684	-0.040577	-0.12835	-0.0364695	548	-1.49518	0.0703125	0.000742345	0.00745596	1	-1.43349	-1.59348	-1.45858
PG5658	Q9CR26;Q3V4B3;F6W5Q8	Vacuolar protein sorting-associated protein VTA1 homolog	Vta1	0.179325	0.0104271	-0.196143	0.0214589	549	1.5267	0.805051	0.000745847	0.00746445	1	1.58788	1.37687	1.61536
PG2543	Q544T7;P45700	alpha-1,2-Mannosidase;Mannosyl-oligosaccharide 1,2-alpha-mannosidase IA	Man1a;Man1a1	0.110673	-0.494885	-0.0726401	-0.589172	550	1.79576	0.859012	0.000747159	0.00746445	1	2.1167	1.79602	1.47456
PG1665	F6RJV6;Q9JJK2	LanC-like protein 2	Lancl2	0.595643	-0.116575	-0.691675	-0.167285	551	1.99934	0.895712	0.000749225	0.00746445	1	2.37049	1.54084	2.08669
PG5889	Q9D706	RNA polymerase II-associated protein 3	Rpap3	0.451869	-0.407899	-0.493929	-0.510851	552	-1.96149	0.0403343	0.000749642	0.00746445	1	-1.49938	-2.25021	-2.13487
PG5887	Q9D6W8	Uncharacterized protein C17orf59 homolog		0.685224	2.17541			553	-2.84149	0.00872093	0.000751322	0.00746445	1	-2.82655	-2.85643
PG4648	Q8BJF9	Charged multivesicular body protein 2b	Chmp2b	0.927417	-0.302653	-1.07984	-0.421192	554	2.63072	0.956214	0.000752871	0.00746445	1	3.29903	1.94224	2.6509
PG0291	A0A0R4J139;Q8BU85	Methionine-R-sulfoxide reductase B3, mitochondrial	Msrb3	-0.192704	-0.150414	0.268457	-0.144418	555	1.54926	0.8125	0.000754189	0.00746445	1	1.4955	1.72696	1.42532
PG4885	S4R2F3;Q8C8R3;Q8C8R3-2;Q8C8R3-4;S4R2T7;S4R2R5;Q8C8R3-5;S4R1J9	Ankyrin-2	Ank2	-0.323423	0.0505026	0.41126	0.111229	556	-1.66241	0.0585029	0.000755192	0.00746445	1	-1.90863	-1.41814	-1.66045
PG2586	Q3U2P8;P49138;Q8R3U8	MAP kinase-activated protein kinase 2	Mapkapk2	-0.214511	-0.27558	0.30488	-0.295281	557	-1.62852	0.0608648	0.000756688	0.00746445	1	-1.62065	-1.4098	-1.8551
PG5579	Q9CQ18	Ribonuclease H2 subunit C	Rnaseh2c	0.0565022	-0.220147	-0.0286658	-0.249729	558	1.5157	0.803052	0.000757221	0.00746445	1	1.64377	1.50745	1.39587
PG2267	Q3TVS6;P10605;Q3TC17	Cathepsin B;Cathepsin B light chain;Cathepsin B heavy chain	Ctsb	0.114099	-0.225274	-0.0982091	-0.260667	559	1.53383	0.806686	0.000758108	0.00746445	1	1.69743	1.48053	1.42352
PG3332	Q3TL79;Q8BK64	Activator of 90 kDa heat shock protein ATPase homolog 1	Ahsa1	-0.109567	-0.176281	0.169542	-0.182726	560	1.51164	0.801962	0.000759504	0.00746484	1	1.52007	1.62779	1.38704
PG3876	Q4FJM2;P46414	Cyclin-dependent kinase inhibitor 1B	Cdkn1b	0.304524	0.158697	-0.359971	0.192085	561	1.67911	0.837028	0.000762807	0.00748394	1	1.72336	1.4013	1.91267
PG1893	H3BKM2;Q80YV2;Q3TI64;Q80YV2-2;D3Z3D0	Nuclear-interacting partner of ALK	Zc3hc1	0.50661	-0.0169953	-0.591451	-0.0386067	562	1.85303	0.868641	0.000766437	0.00749061	1	2.11511	1.44688	1.99709
PG3416	Q3TV94;Q9CY50;Q52PE3	Translocon-associated protein subunit alpha	Ssr1	0.189363	0.239908	-0.226557	0.300489	563	-1.65264	0.0594113	0.000767032	0.00749061	1	-1.72135	-1.85375	-1.38281
PG2974	Q542D6;P97363;Q3UZQ0;Q8BNV0	Serine palmitoyltransferase 2	Sptlc2	-0.0700908	-0.106041	0.11602	-0.100281	564	1.47248	0.795058	0.00076869	0.00749061	1	1.4617	1.54386	1.41188
PG2295	P12382;Q8CD98	ATP-dependent 6-phosphofructokinase, liver type	Pfkl	-0.0342852	-0.095691	0.0717123	-0.0905721	565	1.46317	0.793605	0.000768931	0.00749061	1	1.46649	1.504	1.41904
PG5893	Q9D7B7	Probable glutathione peroxidase 8	Gpx8	0.182637	0.139449	-0.210411	0.178529	566	1.56931	0.816679	0.000772995	0.0075169	1	1.55614	1.3925	1.75928
PG1643	E9QP49;Q99MS7;Q99MS7-3;Q99MS7-2;G5E8Y6;Q99MS7-4;Q99MS7-5	EH domain-binding protein 1-like protein 1	Ehbp1l1	-0.354832	0.271973	0.431819	0.383862	567	1.82054	0.863372	0.000777454	0.00754693	1	1.42576	2.04814	1.9877
PG4891	Q8CAA7;I6L9A5	Glucose 1,6-bisphosphate synthase	Pgm2l1	-0.467608	0.177546	0.576285	0.277885	568	1.87345	0.87391	0.000790096	0.00765614	1	1.47081	2.20895	1.94058
PG5369	Q91YP0	L-2-hydroxyglutarate dehydrogenase, mitochondrial	L2hgdh	-0.116884	-0.206645	0.180839	-0.219158	569	1.51076	0.801781	0.000798553	0.00771315	1	1.533	1.63848	1.36079
PG5982	Q9DBV4;A2AD97	Matrix-remodeling-associated protein 8	Mxra8	0.267184	-0.138042	-0.291058	-0.166743	570	1.5712	0.817042	0.000798782	0.00771315	1	1.76967	1.37916	1.56478
PG5558	Q9CPQ8;Q9D037;Q9CQY3	ATP synthase subunit g, mitochondrial	Atp5l	-1.57876	1.58112			571	2.78826	0.966933	0.000804369	0.0077535	1		2.8175	2.75902
PG2349	Q3V1F2;P18828-2;P18828;Q3THY2	Syndecan;Syndecan-1	Sdc1	-1.56306	2.28701			572	3.40045	0.990189	0.000807366	0.00775822	1		3.08001	3.72088
PG0366	A0A140LIQ1;A0A140LIJ2;Q3UL40;Q9JJG0-3;A0A140LIQ6;E9QL08;E9Q9Z4;Q9JJG0-4;A0A140LJ29;Q9JJG0-2;Q9JJG0	Transforming acidic coiled-coil-containing protein 2	Tacc2	-0.118646	-0.430831	0.20078	-0.492405	573	1.6937	0.84157	0.000807678	0.00775822	1	1.84738	1.86509	1.36863
PG5696	Q9CWS0;D3YU15;Q3UF01	N(G),N(G)-dimethylarginine dimethylaminohydrolase 1	Ddah1	-0.0604014	-0.580914	0.141961	-0.680165	574	1.86723	0.872638	0.000809636	0.00776347	1	2.14243	2.02038	1.43886
PG0405	E3VVQ8;E9Q3Z5;A0A1B0GS91;Q8K4L3-3;Q8K4L3;Q8K4L2;F6R6A4;Q7TMJ2	Supervillin	Svil	-0.325645	0.0778772	0.411785	0.144792	575	1.64595	0.830669	0.000811367	0.00776654	1	1.38231	1.88683	1.66872
PG0866	B2RQS1;Q9ERG2	Striatin-3	Strn3	-0.551533	0.0496856	0.688364	0.128789	576	1.92051	0.884266	0.000814256	0.00778067	1	1.54604	2.34717	1.86832
PG5611	Q9CQF0	39S ribosomal protein L11, mitochondrial	Mrpl11	-0.483045	0.417495	0.575978	0.571752	577	2.08709	0.906613	0.000817367	0.00779686	1	1.534	2.3897	2.33758
PG3151	Q2TBE6	Phosphatidylinositol 4-kinase type 2-alpha	Pi4k2a	-0.162561	0.128444	0.209705	0.19319	578	1.53421	0.806868	0.00082531	0.00782713	1	1.33274	1.63527	1.63464
PG4719	Q8BR63;Q3TVY3	Protein FAM177A1	Fam177a1	-0.30529	-0.0133702	0.39431	0.0318623	579	1.5957	0.822674	0.000825359	0.00782713	1	1.39744	1.83751	1.55214
PG3555	Q3U574;Q9R1X4-3;Q9R1X4-6;Q9R1X4-2;Q9R1X4	Protein timeless homolog	Timeless	-0.162864	-0.225166	0.238152	-0.238004	580	1.53077	0.805778	0.000826001	0.00782713	1	1.538	1.69872	1.35558
PG5120	Q8R1K1;Q8R1R2	Ubiquitin-associated domain-containing protein 2	Ubac2	0.302515	-0.153919	-0.332706	-0.188978	581	-1.59456	0.0626817	0.000826228	0.00782713	1	-1.36678	-1.81184	-1.60507
PG4558	Q8BFS6-2;Q8BFS6;D3Z7F7;Q8BFS6-5;Q8BFS6-4	Serine/threonine-protein phosphatase CPPED1	Cpped1	0.139053	-0.385145	-0.115821	-0.457655	582	1.63823	0.829033	0.000828463	0.00783481	1	1.91036	1.59513	1.4092
PG4051	Q5SSW2	Proteasome activator complex subunit 4	Psme4	-0.0443938	0.405844	0.0441634	0.52186	583	1.75559	0.853743	0.000831414	0.00784712	1	1.45693	1.70995	2.09989
PG1222	D3YZ09;Q3TKG5;Q9CY66-3;Q9CY66-2;Q9CY66	H/ACA ribonucleoprotein complex subunit 1	Gar1	-0.754852	0.106476	0.930785	0.214584	584	2.24954	0.927144	0.000833255	0.00784712	1	1.72678	2.82793	2.19391
PG2845	P62965;Q6P071	Cellular retinoic acid-binding protein 1	Crabp1	-0.272661	-1.82999	0.498935	-2.18612	585	4.23369	0.999637	0.000834042	0.00784712	1	5.12697	4.79187	2.78223
PG3561	Q542K0;Q3U5I9;Q9R078;S4R2R1	5-AMP-activated protein kinase subunit beta-1	Prkab1	0.503462	0.472938	-0.626533	0.559111	586	2.14739	0.914971	0.000838025	0.00786097	1	2.11829	1.65142	2.67248
PG0896	B2RSN3;Q9CWF2;Q7TMM9;Q99J49	Tubulin beta-2B chain;Tubulin beta-2A chain	Tubb2b;Tubb2a	0.71286	2.0993			587	-2.76226	0.0105378	0.00084031	0.00786097	1	-2.71317	-2.81134
PG0424	H7BX44;D3YYN8;E9PVY0;B2RXX8;A0A1D5RLQ9;Q3UU96-2;Q3UU96;F6YZJ7;F6S5Z6;F6Q5A5	Non-specific serine/threonine protein kinase;Serine/threonine-protein kinase MRCK alpha	Cdc42bpa	-0.0516938	-0.0968856	0.0929499	-0.0906128	588	1.43531	0.788154	0.000840952	0.00786097	1	1.42951	1.49027	1.38616
PG4640	Q8BIJ7	RUN and FYVE domain-containing protein 1	Rufy1	-0.109974	0.209951	0.139365	0.288309	589	1.55981	0.814862	0.000841227	0.00786097	1	1.33987	1.60349	1.73609
PG3771	Q3UPH1	Protein PRRC1	Prrc1	0.173002	-0.273792	-0.165894	-0.324625	590	1.55244	0.813408	0.000843092	0.00786272	1	1.77794	1.46122	1.41814
PG2362	Q5FWJ3;Q3U6S1;P20152;Q3V2S4;A0A0A6YWC8;Q3UAX1;Q3TWV0;Q3UD36;A4IF59	Vimentin	Vim	-0.125993	0.335032	0.148888	0.442145	591	1.6861	0.839753	0.000844271	0.00786272	1	1.38322	1.719	1.95608
PG6223	Q9WTP2	Protein sprouty homolog 4	Spry4	2.5678	0.19404			592	3.13897	0.982558	0.000847364	0.00787819	1	3.3933		2.88464
PG1453	E9PZJ8	Activating signal cointegrator 1 complex subunit 3	Ascc3	-0.0939469	0.0860956	0.129736	0.135966	593	1.46959	0.794331	0.000853699	0.00792371	1	1.33185	1.52381	1.5531
PG2376	Q3UFK0;Q3TSZ8;Q3TI59;P21995	Embigin	Emb	-2.43457	-0.332488			594	-3.00464	0.00672238	0.000859249	0.00794153	1	-3.2145		-2.79478
PG5216	Q8VDC1;A0A140T8V9	FYVE and coiled-coil domain-containing protein 1	Fyco1	0.112344	-0.465722	-0.0769848	-0.553744	595	1.70194	0.843932	0.000859475	0.00794153	1	2.00659	1.69537	1.40386
PG5803	Q9D0K2;Q3UK61;Q3U9P7;Q3UJQ9;Q9CRF4	Succinyl-CoA:3-ketoacid coenzyme A transferase 1, mitochondrial;Succinyl-CoA:3-ketoacid-coenzyme A transferase	Oxct1	0.0900991	-0.251876	-0.0669495	-0.291154	596	-1.49677	0.0699491	0.000859948	0.00794153	1	-1.33099	-1.52588	-1.63343
PG0498	Q3UTE4;A1L367;A1L366;Q61550;Q3TG35;Q6ZQJ6	Double-strand-break repair protein rad21 homolog	Rad21	0.0718063	0.0147051	-0.0659017	0.0354226	597	1.43247	0.786882	0.000861432	0.00794191	1	1.43045	1.36773	1.49924
PG2482	Q0PD35;P35282;Q6A0C7	Ras-related protein Rab-21	Rab21	-0.553006	-0.127467	0.70422	-0.0871244	598	1.88991	0.87718	0.000864111	0.00794698	1	1.61925	2.35114	1.69933
PG4643	Q8BIW1	Protein prune homolog	Prune	-0.218388	0.0607882	0.282879	0.115227	599	-1.52108	0.0679506	0.000865481	0.00794698	1	-1.7141	-1.36267	-1.48647
PG0092	A0A0A6YWP9;A0A0A6YXY0;Q9CQ79;A0A0A6YVV3	Thioredoxin domain-containing protein 9	Txndc9	-0.776286	-0.031129	0.967743	0.0485217	600	2.23865	0.926235	0.000866313	0.00794698	1	1.78508	2.8601	2.07077
PG4374	Q6ZPU9;H3BIY2;Q6ZPU9-2	KIF1-binding protein	Kbp;2510003E04Rik	0.164711	0.348853	-0.205268	0.43535	601	1.69907	0.843205	0.000872951	0.00799455	1	1.55209	1.49712	2.04801
PG3489	Q5PPR2;Q3U1G4;Q6P1Y9;Q8R3S6	Exocyst complex component 1	Exoc1	0.123466	-0.107449	-0.118942	-0.117744	602	1.44072	0.789244	0.000876156	0.00801057	1	1.54001	1.35773	1.42442
PG0592	Q05BF9;A8Y5Q1;A2AJP9;A8Y5Q0;A2AJQ0;Q3UV70	[Pyruvate dehydrogenase [acetyl-transferring]]-phosphatase 1, mitochondrial	Pdp1	0.157574	-0.483086	-0.130538	-0.578599	603	1.72812	0.848292	0.000882692	0.00805405	1	2.06856	1.68869	1.42712
PG4746	Q8BTW9;Q8K0U2	Serine/threonine-protein kinase PAK 4	Pak4	0.119565	0.143901	-0.134164	0.189088	604	-1.49261	0.0708576	0.000884795	0.00805405	1	-1.544	-1.61986	-1.31396
PG5210	Q8VCX5;Q8VCX5-3;Q8VCX5-2;E9Q9E0	Calcium uptake protein 1, mitochondrial	Micu1	0.40932	-0.232401	-0.456188	-0.293374	605	1.71011	0.845385	0.00088777	0.00805405	1	2.04454	1.4223	1.6635
PG3905	Q549X4;Q4VA90;Q99P58	Ras-related protein Rab-27B	Rab27b	2.61145	0.162442			606	3.18234	0.983648	0.000888017	0.00805405	1	3.46551		2.89917
PG1302	Q66L71;F8WI56;D3Z7D3;Q8BWT5	Disco-interacting protein 2 homolog A	Dip2a	-0.157496	0.00107808	0.213667	0.0374586	607	1.45701	0.792696	0.000888968	0.00805405	1	1.33363	1.57802	1.45937
PG3058	Q571J2;Q04887	Transcription factor SOX-9	Sox9	-0.097049	0.401989	0.108419	0.521443	608	1.73324	0.849564	0.000890991	0.00805405	1	1.40714	1.73039	2.06218
PG6194	Q9R002	Interferon-activable protein 202	Ifi202	0.544297	-0.255953	-0.618247	-0.333075	609	-1.8913	0.0463299	0.000891154	0.00805405	1	-1.46679	-2.28251	-1.9246
PG0772	B0FTY3;Q8R1N4;Q8R1N4-2;A0A0A0MQL8;Q8R1N4-3	NudC domain-containing protein 3	Nudcd3	0.0832316	-0.0131744	-0.0775637	0.000494709	610	-1.41706	0.0775799	0.000895704	0.00807414	1	-1.39616	-1.48567	-1.36933
PG1307	D3Z7P3-2	Glutaminase kidney isoform, mitochondrial	Gls	0.114137	-0.0778997	-0.109959	-0.0809503	611	1.42528	0.785247	0.000896312	0.00807414	1	1.50185	1.34418	1.42982
PG2861	P63166;A0A087WRQ4	Small ubiquitin-related modifier 1	Sumo1	0.652749	0.147598	-0.782007	0.150222	612	2.04224	0.901708	0.000898686	0.0080823	1	2.28957	1.48832	2.34883
PG2233	Q3U2M7;Q3U126;P06537;P06537-2;Q06VW2;E9PUR6;E9PYV1;P06537-5;P06537-3;P06537-4;E9Q310;Q05DD1	Glucocorticoid receptor	Nr3c1	-0.0956424	0.0428908	0.135226	0.0834164	613	1.43438	0.787427	0.000902384	0.00810232	1	1.32121	1.4981	1.48384
PG5045	Q8K298	Actin-binding protein anillin	Anln	-0.0803113	-0.444635	0.15532	-0.512357	614	1.65145	0.831759	0.000905212	0.00811447	1	1.83492	1.79482	1.32461
PG2518	P40142	Transketolase	Tkt	-0.302081	-0.112562	0.398289	-0.0893602	615	1.55987	0.815044	0.000908388	0.00812348	1	1.42202	1.81782	1.43977
PG4100	Q60770;Q60770-2	Syntaxin-binding protein 3	Stxbp3	-0.230596	-0.150325	0.314469	-0.141227	616	-1.50735	0.0692224	0.000910546	0.00812348	1	-1.58255	-1.29939	-1.64011
PG2590	P49443;Q9EQE2;Q9EQE3;Q8R4T7	Protein phosphatase 1A	Ppm1a	0.0668485	0.0267321	-0.0608354	0.0504925	617	1.41444	0.783067	0.000912997	0.00812348	1	1.40252	1.35139	1.48942
PG4712	Q8BPB5;Q8K0J4	EGF-containing fibulin-like extracellular matrix protein 1	Efemp1	-1.76082	1.48622			618	2.85829	0.970749	0.000913092	0.00812348	1		3.02752	2.68906
PG3358	Q3TMZ1;Q922Q4;Q3TJ21	Pyrroline-5-carboxylate reductase;Pyrroline-5-carboxylate reductase 2	Pycr2	0.234495	0.0542191	-0.266624	0.0703741	619	-1.50171	0.0695858	0.000913596	0.00812348	1	-1.43526	-1.70388	-1.36599
PG0286	A0A0R4J107;Q8R146-2;Q8R146	Acylamino-acid-releasing enzyme	Apeh	-0.0349734	-0.0524791	0.0691168	-0.0378204	620	1.39943	0.778161	0.000917226	0.00814179	1	1.37683	1.43266	1.38881
PG0045	Q3UHL6;Q3UGY5;A0A087WR50;P11276;A0A087WS56;Q3UH17;B9EHT6;A0A087WSN6;B7ZNJ1;Q3TCF1;Q3TBB4;Q3UHR1;Q3TCL7	Fibronectin;Anastellin	Fn1	0.704566	0.0574675	-0.837781	0.036095	621	-2.08081	0.0343387	0.000918614	0.00814179	1	-1.751	-2.65914	-1.8323
PG3085	Q543F3;Q08093;D3Z7R6;Q922F8	Calponin;Calponin-2	Cnn2	-0.161949	-0.414155	0.252049	-0.468546	622	1.64088	0.829578	0.000923674	0.00815704	1	1.76028	1.84373	1.31864
PG2901	P70335-2;P70335	Rho-associated protein kinase 1	Rock1	-0.296798	-0.233655	0.401488	-0.237461	623	1.59235	0.821584	0.000923995	0.00815704	1	1.52901	1.8689	1.37913
PG1203	D3YXW1;Q9D945-2;Q9D945	Protein LLP homolog	Llph	0.228467	-0.0516175	-0.250899	-0.0582006	624	1.47531	0.795785	0.000925384	0.00815704	1	1.60087	1.29791	1.52715
PG3228	Z4YKB8;Q3TEA8-2;Q3TEA8;Z4YKA3;Q3TEA8-3;A2AM65	Heterochromatin protein 1-binding protein 3	Hp1bp3	-0.113385	0.0761321	0.154135	0.125397	625	-1.44388	0.0748547	0.000926263	0.00815704	1	-1.5867	-1.37225	-1.37268
PG2101	O55091	Protein IMPACT	Impact	-0.0477625	-0.105404	0.0888518	-0.101321	626	-1.40188	0.0795785	0.000929577	0.00817315	1	-1.40043	-1.34846	-1.45675
PG5018	Q8K183;D3Z7R1	Pyridoxal kinase	Pdxk	0.316606	-0.0518133	-0.357927	-0.0656095	627	-1.54385	0.0664971	0.000938449	0.00821677	1	-1.36843	-1.79164	-1.4715
PG5617	Q9CQJ2	PIH1 domain-containing protein 1	Pih1d1	0.129184	-0.333289	-0.107953	-0.393616	628	-1.53853	0.0668605	0.000939422	0.00821677	1	-1.30261	-1.58352	-1.72947
PG0280	A0A0R4J0W6;Q9CRC8;Q78KN5	Leucine-rich repeat-containing protein 40	Lrrc40	-0.0285997	-0.243983	0.076583	-0.271874	629	-1.45102	0.0741279	0.000939481	0.00821677	1	-1.35689	-1.38678	-1.60937
PG5040	Q8K239;Q9CZR8;Q3TA37;Q80UT3;Q8VDE3;Q9CX33	Elongation factor Ts;Elongation factor Ts, mitochondrial	Tsfm	0.247428	0.0246989	-0.279987	0.0333228	630	1.49257	0.799055	0.000940509	0.00821677	1	1.58375	1.28563	1.60832
PG4203	Q64727	Vinculin	Vcl	0.0324686	-0.0353483	-0.0141516	-0.0224162	631	1.38888	0.775436	0.000942865	0.0082243	1	1.39422	1.365	1.40742
PG1685	F6XVP7;Q6WIZ9;Q924T7-2;Q924T7;Q6KAP7	E3 ubiquitin-protein ligase RNF31	Rnf31;mFLJ00217	-0.599133	-0.172926	0.76385	-0.138807	632	1.92764	0.885174	0.000945029	0.00823013	1	1.65781	2.43429	1.69082
PG6110	Q9JJ28	Protein flightless-1 homolog	Flii	-0.118132	-0.0842312	0.172634	-0.0697763	633	1.41219	0.782158	0.000951056	0.00826953	1	1.36142	1.51784	1.35731
PG3143	Q91VK1;Q2L4X1;Q3V199;Q3TRM2	Basic leucine zipper and W2 domain-containing protein 2	Bzw2	0.162243	-0.140342	-0.163424	-0.161011	634	1.43491	0.787791	0.000958896	0.0083028	1	1.57552	1.32714	1.40208
PG0205	A0A0R4J000;Q6ZQH5;Q8VC57	BTB/POZ domain-containing protein KCTD5	Kctd5	0.427218	-0.333726	-0.469879	-0.418394	635	1.76112	0.854651	0.000959336	0.0083028	1	2.1655	1.47811	1.63975
PG3141	Q1XID4;Q9CYN9	Renin receptor	Atp6ap2	-0.420444	-2.32842			636	2.81176	0.967842	0.000959407	0.0083028	1	2.97882	2.6447
PG6128	Q9JK38;Q3THZ8	Glucosamine 6-phosphate N-acetyltransferase	Gnpnat1	-0.73505	-2.12591			637	2.68576	0.959847	0.000962465	0.0083067	1	2.59765	2.77388
PG0302	Q3TRK3;A0A0R4J1E3;Q9QXS6-3;Q9QXS6;Q9QXS6-2	Drebrin	Dbn1	0.654808	-0.165488	-0.759646	-0.231746	638	-1.98142	0.0394259	0.000962876	0.0083067	1	-1.54798	-2.47797	-1.9183
PG1952	M0QWX4;P59110;Q8C187	Sentrin-specific protease 1	Senp1	-0.215547	-0.174129	0.298083	-0.17148	639	-1.48344	0.0715843	0.00096583	0.00831913	1	-1.53608	-1.28302	-1.63122
PG2258	P0C7N9;D3Z016	Proteasome assembly chaperone 4	Psmg4	0.230813	-0.0736618	-0.251998	-0.0852739	640	-1.46136	0.0726744	0.000969441	0.00833319	1	-1.32145	-1.63648	-1.42615
PG1746	F8WHU7;Q9D3E6;F6XQW1	Cohesin subunit SA-1	Stag1	0.330267	-0.192497	-0.363348	-0.238281	641	1.57365	0.817769	0.00097049	0.00833319	1	1.83989	1.34148	1.53959
PG0453	A0A1L1STC6;Q6ZWR6-4;Q6ZWR6	Nesprin-1	Syne1	0.0737788	0.265677	-0.0882264	0.341317	642	1.54063	0.808866	0.000973115	0.00833669	1	1.39147	1.427	1.80343
PG2028	Q3TB79;Q8C2J1;Q80Y25;Q3UDG8;Q3TI07;O35350;Q3UF24	Calpain-1 catalytic subunit	Capn1	0.0835396	-0.191715	-0.0637603	-0.217256	643	1.4185	0.784157	0.000973927	0.00833669	1	1.54503	1.38329	1.32717
PG4675	Q8BL66;Q05CS7	Early endosome antigen 1	Eea1	0.210219	-0.0850255	-0.226083	-0.0974564	644	1.44566	0.790516	0.000976723	0.00834764	1	1.58066	1.28913	1.46718
PG5044	Q8K297	Procollagen galactosyltransferase 1	Colgalt1	0.0731988	0.19828	-0.0821702	0.259175	645	-1.47911	0.0721294	0.00098405	0.00839723	1	-1.58879	-1.57957	-1.26896
PG3853	Q921Z9;Q3V100;Q924M7	Mannose-6-phosphate isomerase	Mpi	-0.20191	0.0548178	0.26334	0.106606	646	1.46027	0.793423	0.000987959	0.00841532	1	1.28008	1.60664	1.49409
PG2517	P40124;Q3UVJ2;Q3U0U5;Q3TC53;Q3UNQ0	Adenylyl cyclase-associated protein 1;Adenylyl cyclase-associated protein	Cap1	-0.246695	0.0111588	0.321198	0.0570081	647	1.48065	0.796875	0.000989838	0.00841532	1	1.30097	1.67103	1.46995
PG0902	B2RT77;Q78WZ7	DNA-directed RNA polymerase I subunit RPA43	Twistnb	0.140976	-0.309727	-0.124145	-0.365842	648	1.50383	0.800872	0.000992862	0.00841532	1	1.73249	1.44498	1.33402
PG3437	Q3TWN8;Q9Z110-2;Q9Z110;Q3UGW8;Q3UZ27	Delta-1-pyrroline-5-carboxylate synthase;Glutamate 5-kinase;Gamma-glutamyl phosphate reductase	Aldh18a1	-0.166784	-0.0158745	0.226293	0.017541	649	1.42133	0.784702	0.000993393	0.00841532	1	1.30272	1.55297	1.40831
PG4300	Q6P8X1	Sorting nexin-6;Sorting nexin-6, N-terminally processed	Snx6	0.275219	0.0377858	-0.314778	0.0470213	650	1.49809	0.799964	0.000993815	0.00841532	1	1.59723	1.26648	1.63056
PG0518	Q3UQ95;A2A5W4;Q6P0X6;B7ZC40;Q923X4-2;Q923X4	Glutaredoxin-2, mitochondrial	Glrx2	-0.433525	-2.2616			651	2.73827	0.962573	0.000996534	0.00842538	1	2.88297	2.59357
PG1499	Q3TQZ8;E9Q3N1;Q3UTL4;Q3UGD6;G3MV68;G3MV66;Q09143;G3MV65	High affinity cationic amino acid transporter 1	Slc7a1;SLC7A1	-0.367234	-2.42039			652	2.90054	0.973474	0.000999718	0.00843934	1	3.12236	2.67871
PG2676	P56212;E9Q4B9;E9Q827;P56212-2;E9PXD7	cAMP-regulated phosphoprotein 19	Arpp19	0.339861	0.624113	-0.439845	0.756775	653	2.10147	0.90952	0.00100543	0.00844785	1	1.89073	1.7077	2.70598
PG1185	D3YWB6;Q05BQ9;Q3TQQ3;Q542Q0;P59024	Peptidyl-prolyl cis-trans isomerase FKBP14	Fkbp14	0.911901	2.08452			654	-2.81501	0.00944767	0.00100597	0.00844785	1	-2.62728	-3.00274
PG0817	B1AWB9;O88207	Collagen alpha-1(V) chain	Col5a1	0.544951	0.256687	-0.659749	0.292023	655	-1.90118	0.0448765	0.00100611	0.00844785	1	-1.77913	-2.38955	-1.53487
PG3612	Q4FK14;Q3UQ93;Q3ULV0;Q3UAT2;Q91V04;Q9CVJ6;Q3TPI4	Translocating chain-associated membrane protein;Translocating chain-associated membrane protein 1	Tram1	0.527653	-0.861488	-0.549949	-1.07016	656	2.45735	0.944041	0.00100802	0.00844785	1	3.23017	2.19359	1.9483
PG1504	E9Q517;E9Q3V0;P28571-1;P28571-2;P28571	Transporter;Sodium- and chloride-dependent glycine transporter 1	Slc6a9	2.20511	0.790287			657	2.87291	0.971839	0.00100897	0.00844785	1	2.65903		3.0868
PG5014	Q8K0V4;Q6A015;F6YBV1	CCR4-NOT transcription complex subunit 3	Cnot3;mKIAA0691	-0.265373	0.607052	0.296564	0.785204	658	2.03334	0.900799	0.00100994	0.00844785	1	1.49112	2.12632	2.48259
PG3717	Q3UJF5;Q9Z321;Q9JJ62;F6SDD7	DNA topoisomerase;DNA topoisomerase 3-beta-1	Top3b	-0.0497696	0.0383813	0.0798717	0.0741854	659	1.38035	0.772347	0.00101752	0.0084984	1	1.29573	1.40827	1.43705
PG3162	Q3SXD3	HD domain-containing protein 2	Hddc2	-0.308863	0.0453231	0.393989	0.103728	660	1.53154	0.805959	0.00101966	0.00850334	1	1.2966	1.76515	1.53288
PG0644	A2ARI0;Q0P5W2;Q8C0L0	Thioredoxin-related transmembrane protein 4	Tmx4	0.918467	-0.00717325	-1.09243	-0.0601337	661	2.37123	0.938408	0.00102487	0.00853385	1	2.85994	1.6342	2.61955
PG6252	Q9WVL0;Q9JJA0	Maleylacetoacetate isomerase	Gstz1	-0.151516	0.744088	0.147404	0.943055	662	2.18241	0.919513	0.00102698	0.00853435	1	1.62349	2.15859	2.76515
PG4738	Q8BTJ4-2;Q8BTJ4	Bis(5-adenosyl)-triphosphatase enpp4	Enpp4	0.649285	-0.00286529	-0.765852	-0.0329822	663	1.9292	0.885719	0.00102961	0.00853435	1	2.26346	1.40641	2.11774
PG6066	Q9ERI6;Q3UQM5;Q569U9	Retinol dehydrogenase 14	Rdh14	-0.0955546	-0.000485568	0.138564	0.0305128	664	1.37887	0.771984	0.00103161	0.00853435	1	1.29137	1.4507	1.39455
PG2270	P10649;A2AE89;F6WHQ7	Glutathione S-transferase Mu 1	Gstm1	-0.0890915	0.277178	0.108666	0.368591	665	-1.53648	0.0670422	0.00103195	0.00853435	1	-1.78435	-1.52215	-1.30292
PG5160	Q8R3W5;G3X8S8	tRNA-splicing endonuclease subunit Sen15	Tsen15	-0.619807	-0.102085	0.783334	-0.0507376	666	1.90297	0.880451	0.00103268	0.00853435	1	1.57963	2.41279	1.71651
PG2616	P51655	Glypican-4;Secreted glypican-4	Gpc4	0.115424	0.60411	-0.165679	0.750639	667	-1.9466	0.041061	0.00103539	0.00854394	1	-2.27219	-2.1573	-1.41032
PG0246	A0A0R4J0I9;Q91ZX7	Prolow-density lipoprotein receptor-related protein 1;Low-density lipoprotein receptor-related protein 1 85 kDa subunit;Low-density lipoprotein receptor-related protein 1 515 kDa subunit;Low-density lipoprotein receptor-related protein 1 intracellular domain	Lrp1	0.00355486	0.0529119	0.0139555	0.0875671	668	1.37198	0.770167	0.00104159	0.00858222	1	1.30887	1.35456	1.45251
PG5663	Q9CWK0;Q9CR57;Q569Z0	60S ribosomal protein L14	Rpl14;Rpl14-ps1	0.0241563	0.109733	-0.0155769	0.155183	669	-1.39557	0.0804869	0.00104428	0.00858242	1	-1.48062	-1.44016	-1.26593
PG4367	Q6ZPF4;D3Z7A7;Q6ZPF4-2	Formin-like protein 3	Fmnl3	-0.446089	-0.587076	0.610866	-0.656304	670	2.00283	0.896439	0.00104474	0.00858242	1	2.06401	2.46527	1.47919
PG1232	E9Q7G1;D3YZZ5		Tmed7	-0.173278	-0.569549	0.278146	-0.657123	671	1.77487	0.856831	0.00104944	0.00858388	1	1.97966	2.01605	1.32888
PG3289	Q3TIA9;Q61024;Q3TV20	Asparagine synthetase [glutamine-hydrolyzing]	Asns	-0.121638	0.133227	0.159624	0.195694	672	1.43162	0.786701	0.00105039	0.00858388	1	1.25041	1.49908	1.54537
PG0924	B2RUJ7;Q00519;Q3UMS6	Xanthine dehydrogenase/oxidase;Xanthine dehydrogenase;Xanthine oxidase	Xdh	0.413031	-0.381126	-0.448885	-0.475043	673	-1.74423	0.0530523	0.00105138	0.00858388	1	-1.31986	-2.00698	-1.90586
PG6210	Q9R118	Serine protease HTRA1	Htra1	2.02615	0.49067			674	2.57373	0.953125	0.00105531	0.00858388	1	2.53557		2.6119
PG5946	Q9DB05;Q9CXX1	Alpha-soluble NSF attachment protein	Napa	-0.350556	0.199542	0.432378	0.295186	675	-1.63279	0.0605015	0.00105568	0.00858388	1	-1.98236	-1.39495	-1.52106
PG0356	A0A140LIH0;A0A140LHQ0;A0A140LHG7;Q8VCB2-2;Q8VCB2;Q8VCB2-3	Mediator of RNA polymerase II transcription subunit 25	Med25	-0.0909558	0.0549205	0.128579	0.097705	676	1.38347	0.774164	0.00105592	0.00858388	1	1.26584	1.44118	1.4434
PG3076	Q5EBI8;Q06185;Q8BTB6	ATP synthase subunit e, mitochondrial	Atp5k;Atp5i	-0.54002	1.50426	0.558876	1.90167	677	3.70499	0.996003	0.00105698	0.00858388	1	2.47777	3.84827	4.78894
PG3813	Q3UVK0	Endoplasmic reticulum metallopeptidase 1	Ermp1	-0.0376757	0.386465	0.0375431	0.497681	678	1.63313	0.828125	0.00105739	0.00858388	1	1.34971	1.58578	1.9639
PG3586	Q3U8I4;Q3U9K4;Q80VA0-2;Q80VA0	Polypeptide N-acetylgalactosaminyltransferase;N-acetylgalactosaminyltransferase 7	Galnt7	-0.558122	0.470174	0.662976	0.6421	679	2.10365	0.910065	0.00105952	0.00858854	1	1.47707	2.45631	2.37757
PG4328	Q6PCZ4	Melanoma-associated antigen E1	Magee1	0.00122998	-0.439471	0.0558782	-0.512693	680	-1.57192	0.0646802	0.00106528	0.00860536	1	-1.34548	-1.49467	-1.87561
PG5714	Q9CXA2	Trans-L-3-hydroxyproline dehydratase	L3hypdh	0.195955	-0.227757	-0.197426	-0.270353	681	1.45252	0.791606	0.00106552	0.00860536	1	1.66379	1.3343	1.35948
PG0371	E9Q5W5;A0A140LJ04;Q5SSH7-2;Q5SSH7	Zinc finger ZZ-type and EF-hand domain-containing protein 1	Zzef1	-0.461483	-0.0253034	0.584953	0.0300166	682	1.66898	0.835756	0.00106869	0.00860536	1	1.38963	2.03783	1.57949
PG2218	P02469;Q3UHL7;E9QN70;B9EKB0;Q9CRX6;Q8K271	Laminin subunit beta-1	Lamb1	-0.128461	0.130553	0.168123	0.192988	683	1.42665	0.785429	0.00106968	0.00860536	1	1.24317	1.50006	1.53671
PG5698	Q9CWU9	Nucleoporin Nup37	Nup37	-0.929631	0.783337	1.0893	1.05422	684	2.95289	0.976017	0.00107013	0.00860536	1	1.93166	3.54333	3.38369
PG4273	Q6NXL1;Q8R0M3;Q80V21		Sec24d	0.0463471	0.180285	-0.0481298	0.239414	685	-1.43178	0.0761265	0.00107098	0.00860536	1	-1.54599	-1.5074	-1.24196
PG3985	Q571A2;Q9D4H8;Q9D4H8-2;E0CYT5	Cullin-2	Cul2	0.14503	-0.154144	-0.141423	-0.176441	686	1.39196	0.776344	0.0010752	0.0086056	1	1.53101	1.30055	1.34434
PG4220	Q69ZS0-3;Q69ZS0;Q3UPS8;Q69ZS0-2	E3 ubiquitin-protein ligase PDZRN3	Pdzrn3	-2.03074	-0.704614			687	-2.6259	0.0148983	0.00107547	0.0086056	1	-2.51428		-2.73753
PG2713	Q564G1;P58771-2		Tpm1	-1.53702	2.52998			688	3.59369	0.994004	0.0010757	0.0086056	1		3.14224	4.04514
PG2916	Q3TG37;P70441;Q9R1A1	Na(+)/H(+) exchange regulatory cofactor NHE-RF;Na(+)/H(+) exchange regulatory cofactor NHE-RF1	Slc9a3r1	1.48496	-1.5303			689	-2.56224	0.0167151	0.00107874	0.00861743	1		-2.61066	-2.51381
PG5544	Q99N93;Q9CSU4	39S ribosomal protein L16, mitochondrial	Mrpl16	-1.3358	1.71577			690	2.7019	0.960574	0.00108119	0.00862449	1		2.54044	2.86336
PG5311	Q91VZ1;Q9CWK8;Q3U5L3	Sorting nexin-2	Snx2	0.31576	0.120078	-0.37055	0.144076	691	1.53217	0.806141	0.00108446	0.00863804	1	1.60558	1.25267	1.73828
PG4408	Q78IK2	Up-regulated during skeletal muscle growth protein 5	Usmg5	-0.253449	-0.483538	0.368683	-0.545713	692	1.70284	0.844113	0.00108698	0.00864555	1	1.81158	1.99186	1.30507
PG4501	Q80W47;D3YWK1	WD repeat domain phosphoinositide-interacting protein 2	Wipi2	-0.341693	-0.149062	0.449296	-0.13065	693	1.53609	0.807413	0.00109812	0.0087216	1	1.39744	1.83256	1.37825
PG4032	Q5PRF0	HEAT repeat-containing protein 5A	Heatr5a	-0.4558	0.0113787	0.575138	0.0742871	694	1.65292	0.832304	0.0011047	0.0087521	1	1.35511	2.01032	1.59334
PG4957	Q8CHP5	Partner of Y14 and mago	Wibg	0.374856	-0.0502318	-0.428797	-0.0684196	695	1.54127	0.80923	0.00110514	0.0087521	1	1.74863	1.24665	1.62852
PG2086	O54834-4;O54834-3;O54834;G3UZI7;O54834-2	Rho GTPase-activating protein 6	Arhgap6	0.0688962	-0.745921	-0.00196761	-0.891906	696	1.96276	0.890443	0.00111193	0.00879317	1	2.40841	2.04371	1.43615
PG6270	Q9Z175;E9Q0X7;Q3UM16	Lysyl oxidase homolog 3	Loxl3	-1.33578	1.56851			697	2.5714	0.952762	0.00111559	0.00880944	1		2.48117	2.66162
PG2390	Q3TJN1;P24288;Q9CXX6;Q8CBC8;Q3TKJ1;E9Q4K3	Branched-chain-amino-acid aminotransferase;Branched-chain-amino-acid aminotransferase, cytosolic	Bcat1	0.153969	-0.0115001	-0.163607	-0.00321801	698	1.36781	0.769077	0.00112211	0.00883943	1	1.42764	1.24236	1.43344
PG4354	Q6QD59;B8JJI4;F7C279	Vesicle transport protein SEC20	Bnip1	0.319835	-0.0985882	-0.358135	-0.122913	699	1.48477	0.79742	0.00112264	0.00883943	1	1.68964	1.24322	1.52143
PG5012	Q8K0Q5	Rho GTPase-activating protein 18	Arhgap18	0.254943	-0.0336978	-0.284477	-0.0385018	700	1.42723	0.785792	0.0011242	0.00883943	1	1.55715	1.2253	1.49924
PG2765	Q5M9N6;Q4VAF2;P61514;Q9CYW3;Q3TLC1;Q3U8M3	60S ribosomal protein L37a	Rpl37a	0.618661	-1.33835	-0.622611	-1.65908	701	3.22525	0.985465	0.00112776	0.00884907	1	4.33113	2.97867	2.36597
PG2342	Q3U2J2;Q3TD17;P17809	Solute carrier family 2, facilitated glucose transporter member 1	Slc2a1	0.0261293	0.332365	-0.0356518	0.426517	702	1.54552	0.810683	0.00112964	0.00884907	1	1.33007	1.45739	1.8491
PG2851	P63028	Translationally-controlled tumor protein	Tpt1	0.303518	1.35068	-0.453402	1.64576	703	3.23427	0.985828	0.00113033	0.00884907	1	2.57382	2.73257	4.39641
PG2282	P11352;A0A0A6YY34;A0A0A6YVV2	Glutathione peroxidase 1;Glutathione peroxidase	Gpx1	-0.0417734	0.541483	0.0302102	0.687055	704	-1.80498	0.0505087	0.00113186	0.00884907	1	-2.18229	-1.87829	-1.35438
PG3400	Q3TT94;Q6P1F6;Q571J7;Q3TPC5;Q7TPQ7	Serine/threonine-protein phosphatase 2A 55 kDa regulatory subunit B;Serine/threonine-protein phosphatase 2A 55 kDa regulatory subunit B alpha isoform	Ppp2r2a	-0.160738	-0.18226	0.232163	-0.185853	705	1.39785	0.777616	0.0011335	0.00884931	1	1.38094	1.55601	1.25659
PG5657	Q9CR25	Diphthamide biosynthesis protein 2	Dph2	-0.0471763	-0.0191368	0.0812895	0.0038325	706	1.33013	0.761265	0.00114496	0.00891759	1	1.28094	1.36682	1.34262
PG1986	O08915	AH receptor-interacting protein	Aip	0.593558	-0.125074	-0.688467	-0.17748	707	1.80392	0.860465	0.00114548	0.00891759	1	2.17891	1.34868	1.88415
PG3258	Q3TGM7;Q69ZS7;Q3UJ02;Q69ZS7-2	HBS1-like protein	Hbs1l	0.188421	0.573828	-0.251928	0.707773	708	1.87943	0.875363	0.00114871	0.00892024	1	1.61293	1.61612	2.40923
PG1821	Q8K3D9;Q811T5;G3X8Y8;Q9QUN7	Toll-like receptor;Toll-like receptor 2	Tlr2	0.65746	1.90462			709	-2.51521	0.0179869	0.00114906	0.00892024	1	-2.46474	-2.56569
PG0680	F8WH46;A2CF80;A2CF83;D3Z687;Q9DCT6-4;Q9DCT6-3;Q9DCT6-2;Q9DCT6	Chromatin complexes subunit BAP18	0610010K14Rik;Bap18	-1.34638	1.98098			710	2.94585	0.975654	0.00115248	0.00893362	1		2.66153	3.23017
PG5371	Q91YR1	Twinfilin-1	Twf1	0.332662	-0.1012	-0.373506	-0.127141	711	-1.4871	0.0714026	0.00115403	0.00893362	1	-1.27345	-1.7384	-1.44946
PG4364	Q6Y5D8;Q6Y5D8-4;Q6Y5D8-3;Q6Y5D8-2	Rho GTPase-activating protein 10	Arhgap10	-0.153503	0.125821	0.198912	0.189255	712	1.40673	0.780705	0.00116321	0.00894245	1	1.21192	1.50105	1.50724
PG3587	Q3U8R9;Q3UNH3;Q8CDN6;Q3UBF4	Thioredoxin-like protein 1	Txnl1	0.137745	-0.115562	-0.13564	-0.128799	713	1.35243	0.765262	0.00116446	0.00894245	1	1.46457	1.25957	1.33317
PG0844	Q6PHA0;Q9JIA0;B2C3G8;P42230	Signal transducer and activator of transcription;Signal transducer and activator of transcription 5A	Stat5a	-0.650004	-0.0474694	0.815671	0.0183218	714	-1.8895	0.0465116	0.00116528	0.00894245	1	-2.26215	-1.36585	-2.04049
PG1358	E3SRG8;Q811W8;P97471;E3SRG9;E3SRG7;E3SRH0	Mothers against decapentaplegic homolog;Mothers against decapentaplegic homolog 4	Smad4	-0.000387583	-0.233188	0.0414622	-0.261004	715	1.36955	0.769622	0.00116563	0.00894245	1	1.47321	1.4092	1.22622
PG4771	Q8BVZ5;E9M2E8;H3BLN5	Interleukin-33;Interleukin-33(102-266);Interleukin-33(109-266)	Il33	2.29361	0.156554			716	2.79978	0.96766	0.00116797	0.00894245	1	3.03458		2.56499
PG5066	Q8K354	Carbonyl reductase [NADPH] 3	Cbr3	-0.219024	-0.391937	0.319601	-0.436809	717	-1.56027	0.065407	0.00116843	0.00894245	1	-1.48621	-1.31601	-1.87858
PG2572	Q4V9T8;P48024;Q3UBT8;J3QN87	Eukaryotic translation initiation factor 1	Eif1	0.0667204	0.115254	-0.0677092	0.158453	718	1.36614	0.768895	0.00116858	0.00894245	1	1.30185	1.2865	1.51007
PG1528	Q3UDK0;Q3U2A3;Q3TPN9;E9Q605;Q8CBT3;Q3U2E5;E9QNL4;Q60680;A0AUV3;Q60680-3	Inhibitor of nuclear factor kappa-B kinase subunit alpha	Chuk	-0.611273	-1.99682			719	2.49132	0.946403	0.00117043	0.00894245	1	2.46162	2.52103
PG5265	Q8VHE0;Q80YG4;Q8K2U5	Translocation protein SEC63 homolog	Sec63	-0.239728	0.0138234	0.312526	0.0596908	720	1.41709	0.783975	0.0011711	0.00894245	1	1.23977	1.6014	1.41009
PG0875	B2RRH9;Q3THK7	GMP synthase [glutamine-hydrolyzing]	Gmps	-0.0835837	-0.19012	0.139084	-0.201716	721	-1.35908	0.0863009	0.00117239	0.00894245	1	-1.3278	-1.26107	-1.48836
PG5055	Q8K2J0;F7AAE0	1-phosphatidylinositol 4,5-bisphosphate phosphodiesterase delta-3;Phosphoinositide phospholipase C	Plcd3	0.00160509	-0.356219	0.0488117	-0.411199	722	1.45559	0.792333	0.00117305	0.00894245	1	1.63306	1.51685	1.21686
PG2635	Q8R4D4;P52633	Signal transducer and activator of transcription;Signal transducer and transcription activator 6	Stat6	-0.0901189	-0.0281473	0.134159	-0.00366223	723	1.33092	0.761446	0.00117648	0.00895624	1	1.26283	1.40362	1.32632
PG3019	P99027	60S acidic ribosomal protein P2	Rplp2	0.171536	-0.254518	-0.165645	-0.301002	724	-1.41923	0.0772166	0.0011795	0.00896684	1	-1.20594	-1.51291	-1.53885
PG5192	Q8VCE9-4;Q8VCE9	Pleckstrin homology domain-containing family H member 3	Plekhh3	1.30335	2.37285			725	-3.28976	0.00399709	0.00118133	0.0089683	1	-2.89319	-3.68633
PG2012	Q8C9Y1;O35188	Fractalkine;Processed fractalkine	Cx3cl1	-1.95511	-0.502301			726	-2.47808	0.0192587	0.00118492	0.00897432	1	-2.49256		-2.46359
PG2958	P84244;E0CZ27;F8WI35;P02301	Histone H3.3;Histone H3;Histone H3.3C	H3f3a;H3f3c	3.03658	-0.0357318			727	3.63577	0.995094	0.001187	0.00897432	1	4.12478		3.14675
PG5920	Q9D8T2	Gasdermin-D	Gsdmdc1	-0.497971	-2.03269			728	2.49339	0.946584	0.00118701	0.00897432	1	2.54812	2.43865
PG4496	Q80V26	Inositol monophosphatase 3	Impad1	-0.659782	-0.312327	0.848579	-0.30387	729	1.96398	0.890988	0.00119801	0.00903517	1	1.74227	2.54536	1.60431
PG4699	Q8BU21;Q8BML9;Q3TN94;Q8R1V9		Qars	-0.0991979	-0.257818	0.163423	-0.283002	730	1.39162	0.775981	0.00119834	0.00903517	1	1.45407	1.51486	1.20592
PG5638	Q9CQV1;A0A1L1SQA2	Mitochondrial import inner membrane translocase subunit TIM16	Pam16	0.128086	0.589212	-0.179873	0.731441	731	1.85971	0.870821	0.00120217	0.00905165	1	1.55007	1.64171	2.38735
PG3948	Q8C2A1;Q543B6;Q64314;Q543Y2;Q3TJP6;Q64314-2	Hematopoietic progenitor cell antigen CD34	Cd34	0.2313	2.67242			732	-3.2627	0.00417878	0.00120477	0.00905618	1	-3.65712	-2.86827
PG4063	Q5SW88;Q5SW87		Rab1	-0.904759	1.13532	1.03115	1.48143	733	3.30981	0.987645	0.00120606	0.00905618	1	2.09468	3.81402	4.02071
PG0735	A6H630	Protein-glutamate O-methyltransferase	Armt1	-0.129416	0.897306	0.108397	1.1281	734	2.33775	0.934593	0.00121087	0.00906537	1	1.70079	2.26739	3.04506
PG1970	O08734;Q91WX5	Bcl-2 homologous antagonist/killer	Bak1	0.0551897	-0.221393	-0.0269728	-0.251141	735	-1.35412	0.0872093	0.00121164	0.00906537	1	-1.22605	-1.36108	-1.47522
PG2361	P20108;Q8K4K8	Thioredoxin-dependent peroxide reductase, mitochondrial	Prdx3	-0.0806869	-0.114757	0.129581	-0.110047	736	1.32399	0.759811	0.00121223	0.00906537	1	1.31238	1.40548	1.25411
PG1162	D3YUG5;D3YUI2;Q3U1I6;Q8K4J6-2;Q8K4J6;Q3U3V7	MKL/myocardin-like protein 1	Mkl1	-0.760154	-0.127067	0.955768	-0.0697852	737	2.04343	0.902616	0.00121489	0.00907297	1	1.65564	2.67008	1.80458
PG1321	D6RFV4;Q8BM48;Q9D8V7;D3Z5H3	Signal peptidase I;Signal peptidase complex catalytic subunit SEC11C	Sec11c	-0.319047	-2.31388			738	2.75909	0.96439	0.00122049	0.00909577	1	2.99234	2.52584
PG3899	Q4TVN0;Q9CXF4;Q7TPU5	TBC1 domain family member 15	Tbc1d15	-0.159825	0.0229632	0.214758	0.0643365	739	1.355	0.765807	0.00122125	0.00909577	1	1.21737	1.47375	1.37387
PG4965	Q8CHX7	Raftlin-2	Rftn2	0.00743362	0.331212	-0.0128544	0.426631	740	1.51321	0.802326	0.00122697	0.00911004	1	1.28789	1.44023	1.81151
PG2159	Q3U9D1;O88512;Q3UHW6	AP-1 complex subunit gamma-like 2	Ap1g2	-0.338882	-0.322076	0.45962	-0.341864	741	1.57687	0.818314	0.00122801	0.00911004	1	1.54202	1.90371	1.28488
PG1362	E9PUA0;D3YTR3;Q3UE17;Q3UE17-2	RNA-binding protein MEX3D	Mex3d	0.204499	-0.113544	-0.216873	-0.131769	742	1.36848	0.769259	0.00122813	0.00911004	1	1.5171	1.2219	1.36645
PG1755	Q6NXV2;Q3U9N0;Q3U689;Q3TWZ6;Q3TLV0;Q3UDQ8;F8WIJ0;Q9JIS8;Q3TWV2;Q3TPD4	Solute carrier family 12 member 4	Slc12a4	-0.136977	0.0384851	0.185777	0.0814064	743	1.34456	0.764353	0.00123406	0.0091381	1	1.21066	1.44213	1.38088
PG2198	O88986;Q9CZ08;E9PWY6	2-amino-3-ketobutyrate coenzyme A ligase, mitochondrial	Gcat	0.0265582	-0.0812635	-0.0033274	-0.0779278	744	1.30183	0.752544	0.00123524	0.0091381	1	1.33096	1.29132	1.2832
PG1860	Q8C6F3;G5E897		Kdelc2	-0.0852241	-0.0696239	0.131507	-0.0546401	745	1.31313	0.756722	0.00123692	0.00913829	1	1.2723	1.38973	1.27735
PG6195	Q9R045;Q9CZZ8	Angiopoietin-related protein 2	Angptl2	-0.0152267	0.0105568	0.040129	0.037444	746	1.30381	0.753089	0.00124565	0.00916641	1	1.25511	1.30937	1.34693
PG1455	Q9CSS1;E9PZM7;Q6ZPE9;Q810T0		Scaf11	0.293131	-0.0133486	-0.332472	-0.0167931	747	-1.42355	0.0768532	0.00124645	0.00916641	1	-1.2841	-1.65983	-1.32672
PG1359	E3WH30;Q8BP27-2;Q8BP27;Q8BP27-3	Swi5-dependent recombination DNA repair protein 1 homolog	Sfr1	0.0239953	0.704214	-0.0625879	0.880152	748	1.99652	0.895531	0.00124676	0.00916641	1	1.5602	1.84	2.58935
PG2037	Q8C4U8;O35474	EGF-like repeat and discoidin I-like domain-containing protein 3	Edil3	2.20779	0.9115			749	2.9104	0.973837	0.00124898	0.00916641	1	2.61393		3.20687
PG1354	E0CZ78;P48453-2;P48453;G3X8U7;E9Q6P2;Q3UXV4	Serine/threonine-protein phosphatase;Serine/threonine-protein phosphatase 2B catalytic subunit beta isoform	Ppp3cb	0.106117	-0.0666617	-0.101111	-0.0665935	750	1.31234	0.756541	0.00124906	0.00916641	1	1.37775	1.23552	1.32376
PG3994	Q8BRU5;Q5BKP5;Q99MJ9	ATP-dependent RNA helicase DDX50	Ddx50	-0.205861	0.100357	0.264523	0.162462	751	1.39788	0.777798	0.00125453	0.0091867	1	1.18856	1.53882	1.46626
PG1760	Q3TIW4;F8WJ43;Q9D3K3;P46662-2;P46662	Merlin	Nf2	0.318881	2.21587			752	-2.75988	0.0107195	0.00125516	0.0091867	1	-3.00278	-2.51697
PG2195	O88958;Q6A0D9;Q3TKA0;Q8BK00	Glucosamine-6-phosphate isomerase 1;Glucosamine-6-phosphate isomerase	Gnpda1	-0.387715	0.0459878	0.489701	0.110953	753	1.53238	0.806323	0.00125886	0.00919597	1	1.25255	1.82886	1.51574
PG0623	A2AP78;Q544R9;O54879	High mobility group protein B3	Hmgb3	-0.628166	-0.910195	0.857656	-1.03553	754	2.50683	0.948038	0.00125977	0.00919597	1	2.65613	3.17564	1.6887
PG0259	Q3TUQ8;A0A0R4J0P6;Q8VDG3	Poly(A)-specific ribonuclease PARN	Parn	-0.340865	0.284755	0.413842	0.398313	755	1.61729	0.825218	0.00126459	0.00921898	1	1.22284	1.83133	1.79769
PG0960	B2RXR2;Q8VD65;B2RY05	Phosphoinositide 3-kinase regulatory subunit 4	Pik3r4	0.0131632	0.664088	-0.0462459	0.832099	756	1.92794	0.885356	0.00126753	0.00922813	1	1.50921	1.78764	2.48697
PG1330	E0CX79;E0CXR3;E0CZD9;E0CXM9;Q9DB43;E0CXA3	Zinc finger protein-like 1	Zfpl1	-0.196552	0.0883912	0.254168	0.147112	757	1.38307	0.773983	0.00126987	0.00923299	1	1.18607	1.51883	1.44431
PG4068	Q8BK37;Q5SWZ0;Q8R574;Q05BD4	Phosphoribosyl pyrophosphate synthase-associated protein 2	Prpsap2	-0.207668	-0.010906	0.275552	0.0269258	758	-1.36237	0.0852108	0.00127586	0.00926431	1	-1.50699	-1.19901	-1.38111
PG2143	Q3UB06;O70551;Q3US65;Q3TTF9;Q3TTI6;Q3URR1	SRSF protein kinase 1	Srpk1	-0.0907694	-0.22391	0.150494	-0.242337	759	-1.34823	0.087936	0.00127976	0.00927398	1	-1.30105	-1.23812	-1.50553
PG5851	Q9D2G2;Q9D2G2-2	Dihydrolipoyllysine-residue succinyltransferase component of 2-oxoglutarate dehydrogenase complex, mitochondrial	Dlst	0.10157	-0.0723342	-0.0951377	-0.073141	760	1.30337	0.752907	0.00128056	0.00927398	1	1.36956	1.23126	1.3093
PG4548	Q810A3;Q6P3Y6	Tetratricopeptide repeat protein 9C	Ttc9c	0.297203	-0.0908409	-0.331264	-0.111624	761	1.41648	0.783612	0.00128554	0.00929359	1	1.60401	1.19156	1.45388
PG2030	Q3U5I8;Q8QZY7;O35375-5;O35375-6;O35375-2;O35375-3;O35375-4;O35375	Neuropilin-2	Nrp2	0.113339	-0.75386	-0.0553125	-0.905202	762	-1.91424	0.0436047	0.00128665	0.00929359	1	-1.43882	-1.86729	-2.43661
PG5687	Q9CVI1;Q9CVF5;Q9JI75	Ribosyldihydronicotinamide dehydrogenase [quinone]	Nqo2	2.44029	0.0669598			763	2.95022	0.975836	0.00129454	0.0093383	1	3.27057		2.62987
PG3524	Q4FJQ6;Q3U3L3;Q60854;F8WIV2;K7E6F1;E9Q108;E9Q0P9	Serpin B6	Serpinb6a;Serpinb6	-0.154233	-0.151994	0.221859	-0.149474	764	1.3391	0.762718	0.00129849	0.00935402	1	1.30799	1.48637	1.22296
PG6181	Q9QZA0	Carbonic anhydrase 5B, mitochondrial	Ca5b	1.34157	-1.49422			765	-2.40889	0.0205305	0.00130011	0.00935402	1		-2.40068	-2.4171
PG4382	Q6ZQC8		Ttc37	-0.303397	-0.504848	0.431038	-0.567637	766	1.68599	0.839571	0.00130561	0.00936378	1	1.77913	2.01893	1.2599
PG4825	Q8C140;Q9QXX4;Q91YK1	Calcium-binding mitochondrial carrier protein Aralar2	Slc25a13	-0.342825	-0.192822	0.454146	-0.183921	767	1.48799	0.797965	0.00130603	0.00936378	1	1.37456	1.79362	1.29579
PG5576	Q9CQ02;A0A1L1SRX4;A0A1L1ST08;A0A1L1SRJ9;A0A1L1SVC7	COMM domain-containing protein 4	Commd4	0.373948	0.391061	-0.462738	0.4698	768	1.72035	0.846657	0.00130657	0.00936378	1	1.66652	1.34328	2.15126
PG4608	Q8BH78;Q8K3G7;Q8BHF5;Q78NS1;Q99P72-1	Reticulon;Reticulon-4	Rtn4	-0.12626	0.176226	0.161823	0.248506	769	1.38289	0.773619	0.00131582	0.00941778	1	1.17367	1.44593	1.52906
PG5993	Q9DC48;Q3UXN9	Pre-mRNA-processing factor 17	Cdc40	0.458542	-0.329709	-0.508241	-0.416044	770	1.66109	0.833757	0.00131981	0.00943404	1	2.08077	1.3523	1.5502
PG3255	Q3TGF2;H3BLM7;H9H9T1	Protein FAM107B	Fam107b	-0.535285	0.00133977	0.672469	0.068511	771	1.67839	0.836664	0.00132427	0.00945364	1	1.34165	2.10118	1.59235
PG5374	Q91YR9;Q4FJY5	Prostaglandin reductase 1	Ptgr1	-0.361537	0.117973	0.452192	0.196608	772	-1.51153	0.068859	0.00132655	0.00945768	1	-1.81911	-1.24953	-1.46594
PG4423	Q7M739;Q3V1L5		Tpr	0.134764	-0.104639	-0.132887	-0.115236	773	-1.30568	0.0926599	0.00133332	0.00949364	1	-1.20168	-1.39823	-1.31714
PG3961	Q8CBE6;Q8BPJ7;Q544G5;Q62165;D9IFT4	Dystroglycan;Alpha-dystroglycan;Beta-dystroglycan	Dag1	0.992726	0.598982	-1.23075	0.673017	774	2.66875	0.958757	0.00134656	0.00957552	1	2.8413	1.75813	3.40682
PG5864	Q9D486-3;Q9D486;B2RY70;Q9D486-2	C-Maf-inducing protein	Cmip	0.517165	0.121576	-0.615274	0.129519	775	-1.6631	0.0583212	0.00135183	0.00957876	1	-1.47691	-2.10379	-1.40858
PG2530	P42669;Q8C6E9	Transcriptional activator protein Pur-alpha	Pura	0.0997661	-0.0225736	-0.0968984	-0.0123124	776	1.28631	0.749273	0.00135222	0.00957876	1	1.32209	1.20626	1.3306
PG5219	Q8VDF2;Q8VDF2-2	E3 ubiquitin-protein ligase UHRF1	Uhrf1	-0.192487	-0.29133	0.279383	-0.316279	777	1.41309	0.782703	0.00135223	0.00957876	1	1.44269	1.61718	1.1794
PG5599	Q9CQ86	Migration and invasion enhancer 1	Mien1	-0.75082	-1.9446			778	2.47939	0.945312	0.00135932	0.00961656	1	2.34406	2.61472
PG4092	Q642K0;Q60605-2;Q60605;Q3TIG9	Myosin light polypeptide 6	Myl6	0.0454456	-0.0403624	-0.0295139	-0.0295865	779	1.27139	0.745094	0.0013642	0.00963868	1	1.28702	1.23809	1.28907
PG2983	Q3TXY0;Q6P1J1;P97427;Q3TY94	Dihydropyrimidinase-related protein 1	Crmp1	-2.25444	-0.204367			780	-2.75254	0.0109012	0.00136875	0.00965732	1	-3.02045		-2.48462
PG0248	A0A0R4J0J5;Q8K114;Q8K114-2	Integrator complex subunit 9	Ints9	-0.303844	-0.320505	0.416942	-0.342799	781	1.50469	0.801235	0.00137034	0.00965732	1	1.48869	1.80325	1.22214
PG4523	Q80Y14	Glutaredoxin-related protein 5, mitochondrial	Glrx5	0.18142	-0.091252	-0.190614	-0.102707	782	1.31555	0.757086	0.00137437	0.00967333	1	1.43797	1.1832	1.32547
PG2608	Q3TGU7;P50580;Q05BN2;Q3UMW2;P50580-2;D3YVH7	Proliferation-associated protein 2G4	Pa2g4	0.0874781	-0.0987131	-0.0759286	-0.104163	783	1.27949	0.747456	0.00137708	0.00968003	1	1.35331	1.2236	1.26156
PG5968	Q9DBF7	Pre-mRNA-splicing factor CWC25 homolog	Cwc25	0.336544	-0.107528	-0.377719	-0.135174	784	-1.42838	0.0764898	0.00138021	0.00968965	1	-1.20879	-1.68158	-1.39475
PG1883	Q8BMS7;H3BLI6;H3BL44;Q69ZL4;Q3TVY6;H3BIX7;Q3UZR5;Q80XR2;Q3TTD2	Calcium-transporting ATPase;Calcium-transporting ATPase type 2C member 1	Atp2c1	0.741323	0.677973	-0.931696	0.789796	785	-2.39654	0.0210756	0.00138845	0.00972593	1	-2.41253	-3.1212	-1.65589
PG5584	Q9CQ28;Q9CQ28-2;Q9CQ28-3	Diphthine--ammonia ligase	Dph6	-0.0207922	0.037537	0.0447458	0.0707985	786	1.27633	0.746548	0.00138891	0.00972593	1	1.20856	1.28126	1.33917
PG5461	Q99JT9;F7ARY2	1,2-dihydroxy-3-keto-5-methylthiopentene dioxygenase	Adi1	0.46136	0.044662	-0.541392	0.040264	787	1.55898	0.81468	0.00140022	0.00979267	1	1.75911	1.17737	1.74047
PG0872	B2RRE0;Q9WTQ5-2;Q9WTQ5	A-kinase anchor protein 12	Akap12	-0.520483	-0.475468	0.692355	-0.514148	788	1.83061	0.864826	0.00140426	0.00980845	1	1.78388	2.33145	1.3765
PG0348	A0A0U1RQ37;Q921J4;A0A0U1RQ22	Ubiquitin-conjugating enzyme E2 S	Ube2s	0.268987	0.0289291	-0.306506	0.0367277	789	-1.37052	0.0841206	0.00140684	0.00981402	1	-1.26967	-1.59548	-1.24642
PG4371	Q6ZPS0		Rrbp1	-0.0661831	0.872086	0.0336031	1.0922	790	2.20035	0.921512	0.00141224	0.00983112	1	1.61398	2.08424	2.90285
PG2110	O55222;D3YZA5	Integrin-linked protein kinase	Ilk	-0.318145	-0.0836017	0.415499	-0.0527375	791	1.4123	0.78234	0.00141287	0.00983112	1	1.24828	1.67763	1.311
PG6265	Q9Z0U1	Tight junction protein ZO-2	Tjp2	0.446287	0.143272	-0.530916	0.161742	792	1.57303	0.817587	0.0014151	0.00983424	1	1.7064	1.18487	1.82782
PG4491	Q80UU9	Membrane-associated progesterone receptor component 2	Pgrmc2	-0.133643	-0.103441	0.192997	-0.0919402	793	-1.29084	0.0939317	0.00141759	0.00983866	1	-1.33902	-1.16918	-1.36432
PG4416	Q78ZM0;D3Z789;Q9CU14;Q9CSC2;D3Z6Z0;O70492	Sorting nexin-3	Snx3	-0.0887723	0.0478741	0.126486	0.0889345	794	1.28509	0.748728	0.00141931	0.00983866	1	1.17284	1.34238	1.34003
PG5870	Q9D600	DNA replication complex GINS protein PSF2	Gins2	-0.173372	0.10682	0.224552	0.167699	795	1.33979	0.763081	0.00142536	0.00986815	1	1.14499	1.45356	1.42083
PG0852	Q3UWP8;B2MWM9;P14211	Calreticulin	Calr	0.198346	0.0175412	-0.219809	0.028587	796	-1.31572	0.090843	0.00143378	0.00991398	1	-1.24801	-1.4821	-1.21706
PG2253	Q3UDR2;Q3TWE3;Q3THC3;Q3TF72;P09103;Q3URP6;Q3UBY9;Q3UJA8;Q3UA23;Q3TIM0;Q3TGS0;Q3TT76	Protein disulfide-isomerase	P4hb	0.129934	0.250058	-0.155186	0.317701	797	-1.40257	0.0792151	0.0014418	0.00995695	1	-1.51082	-1.55812	-1.13877
PG5387	Q99J29;Q920A5;Q3U5P4	Retinoid-inducible serine carboxypeptidase	Scpep1	0.226303	1.34803	-0.359414	1.64881	798	3.01499	0.978198	0.00144982	0.00999974	1	2.31253	2.57548	4.15695
PG1383	E9PV41;E9PXV7;Q5DTQ4;O08808;F6XC54;D3Z074;Q3U104	Protein diaphanous homolog 1	Diap1;Diaph1	0.0684	0.153701	-0.0728021	0.205202	799	1.31608	0.757449	0.00145532	0.0100251	1	1.23002	1.22785	1.49036
PG3071	Q9CRY0;Q05DA2;Q8BU14	Translocation protein SEC62	Sec62	0.319366	-0.238972	-0.346418	-0.29407	800	-1.43656	0.0757631	0.00145886	0.010037	1	-1.14902	-1.65127	-1.50939
PG4481	Q80U72;Q80U72-4;Q80U72-2;Q80U72-3;F6RIN9;Q6P9N3	Protein scribble homolog	Scrib	-0.233557	-0.18274	0.32064	-0.180516	801	-1.3565	0.0866642	0.00146255	0.0100464	1	-1.41422	-1.14006	-1.51521
PG4899	Q8CB77	Transcription elongation factor B polypeptide 3	Tceb3	0.264171	-0.159119	-0.285725	-0.192201	802	-1.36095	0.0857558	0.00146389	0.0100464	1	-1.15173	-1.54661	-1.38451
PG3772	S4R189;Q3UPH7-3;Q3UPH7-6;Q3UPH7-2;Q3UPH7;S4R2U9	Rho guanine nucleotide exchange factor 40	Arhgef40	-0.0393836	0.044972	0.0667346	0.0813777	803	1.26376	0.742733	0.00146594	0.010048	1	1.1811	1.28214	1.32803
PG5313	Q91W18-2;Q91W18-3;Q91W18	Tudor domain-containing protein 3	Tdrd3	-0.175988	-0.431356	0.270464	-0.48838	804	1.48814	0.798147	0.00147312	0.0100841	1	1.60977	1.70545	1.14921
PG4102	Q60848;Q60848-2	Lymphocyte-specific helicase	Hells	-0.556114	-0.310531	0.722531	-0.310113	805	1.7316	0.849019	0.00147659	0.0100841	1	1.56733	2.22981	1.39765
PG3259	Q6ZWQ5;Q3TGS7;Q3V2H3;Q99M52;O70493	Sorting nexin-12	Snx12	-0.113527	-0.0677334	0.165731	-0.0500322	806	-1.2667	0.0961119	0.0014767	0.0100841	1	-1.32462	-1.16784	-1.30764
PG2418	Q3UE40;P27601	Guanine nucleotide-binding protein subunit alpha-13	Gna13	0.190165	0.138891	-0.219509	0.177236	807	-1.34503	0.0886628	0.00148084	0.0100998	1	-1.35362	-1.52774	-1.15373
PG1327	E0CZ04;E0CX39;Q923B0-2;Q923B0	Gamma-glutamylaminecyclotransferase	Ggact	0.188835	-0.489237	-0.168016	-0.588643	808	-1.54231	0.0666788	0.00148876	0.0101412	1	-1.1806	-1.60556	-1.84077
PG1174	Q3UD86;Q3TFC0;D3Z3E8;Q69ZE2;E9PW39;D3YVL0;P23249	Putative helicase MOV-10	Mov10	0.250959	0.0131161	-0.283355	0.0189108	809	-1.33334	0.0897529	0.0014999	0.0102045	1	-1.23332	-1.54091	-1.22579
PG3171	Q3TA31;Q91WF7	Polyphosphoinositide phosphatase	Fig4	-0.600894	-1.85102			810	2.31725	0.933321	0.00150945	0.0102473	1	2.2653	2.36921
PG3024	Q543R4;Q00493	Carboxypeptidase E	Cpe	0.571779	-0.444814	-0.636627	-0.565622	811	1.81685	0.86319	0.00150991	0.0102473	1	2.36843	1.43928	1.64283
PG0172	Q7TND2;Q6P215;A0A0M6L0W4;P04095;A0A0M5HDY5;P04095-2;P04768	Prolactin-2C2;Prolactin-2C3	Prl2c2;Prl2c3	-1.2279	-2.27887			812	3.03796	0.979469	0.00151981	0.0103017	1	2.64466	3.43125
PG3304	Q3TJ28;Q99LU0;Q9CQD4	Charged multivesicular body protein 1b-1;Charged multivesicular body protein 1b-2	Chmp1b;Chmp1b1;Chmp1b2	-0.0722575	0.265457	0.0891515	0.352928	813	1.38296	0.773801	0.00152894	0.0103466	1	1.15151	1.38605	1.61133
PG0774	B0QZH9;Q8BSN5;Q8BSN5-3;Q8BSN5-2	PHD finger protein 23	Phf23	-0.516198	-1.85528			814	2.29243	0.930959	0.00153149	0.0103466	1	2.29907	2.2858
PG6209	Q9R0Y5;Q9R0Y5-2;A0A0A6YXW8	Adenylate kinase isoenzyme 1	Ak1	-0.134959	0.286218	0.163653	0.383347	815	-1.41831	0.0773983	0.00153207	0.0103466	1	-1.69741	-1.36905	-1.18847
PG0639	A2AQU8;Q9D975	Sulfiredoxin-1	Srxn1	0.353714	-0.00429542	-0.406769	-0.0106814	816	1.4062	0.78016	0.00153458	0.0103509	1	1.57449	1.11981	1.52429
PG1878	G5E8V9		Arfip1	-0.0632243	0.37379	0.0695783	0.484302	817	-1.48102	0.071766	0.00154012	0.0103677	1	-1.77137	-1.50557	-1.16611
PG3392	Q3TSR1;Q91XD6;Q3UBB2	Vacuolar protein-sorting-associated protein 36	Vps36	-0.470664	-0.440843	0.6291	-0.475976	818	-1.70692	0.0554142	0.00154205	0.0103677	1	-1.74599	-1.25241	-2.12237
PG6024	Q9DD18;Q9DD18-2	D-tyrosyl-tRNA(Tyr) deacylase 1	Dtd1	0.229086	0.330436	-0.281989	0.407654	819	-1.4932	0.0706759	0.00154406	0.0103677	1	-1.59297	-1.74311	-1.14351
PG5204	Q8VCR7;E9QN99;A0A087WPF8;A0A087WSR2;A0A1L1SUX1;A0A087WRJ2	Alpha/beta hydrolase domain-containing protein 14B	Abhd14b	-0.381242	-0.0186757	0.486974	0.0315712	820	1.44069	0.789062	0.00154603	0.0103677	1	1.20271	1.74419	1.37518
PG5228	Q8VDS4	Regulation of nuclear pre-mRNA domain-containing protein 1A	Rprd1a	0.321147	0.705181	-0.423554	0.857157	821	1.99027	0.89444	0.00154649	0.0103677	1	1.72108	1.59617	2.65357
PG0886	B2RRX2;P63328-2;P63328;Q4V9X0	Serine/threonine-protein phosphatase;Serine/threonine-protein phosphatase 2B catalytic subunit alpha isoform	Ppp3ca	-0.467754	-0.129922	0.600877	-0.0970529	822	-1.53495	0.0672238	0.00156562	0.0104832	1	-1.75605	-1.14137	-1.70744
PG4962	Q8CHT0	Delta-1-pyrroline-5-carboxylate dehydrogenase, mitochondrial	Aldh4a1	0.596421	1.7277			823	-2.28695	0.0257994	0.00156756	0.0104834	1	-2.2425	-2.3314
PG0531	A2A8E2;B7ZC72;B7ZC71;Q8BHG2;Q8BHG2-2;Q8BHG2-3;A2A8E4;D6REH4	UPF0587 protein C1orf123 homolog	0610037L13Rik	-1.28277	1.281			824	2.27177	0.928961	0.00158328	0.0105757	1		2.29326	2.25027
PG5516	Q99LM9	Transcriptional adapter 1	Tada1	-1.25624	0.181821	1.53373	0.347254	825	-2.744	0.0114462	0.00158549	0.0105776	1	-3.59422	-1.77925	-2.85852
PG0139	A0A0G2JGD2;Q545V2;P07091	Protein S100;Protein S100-A4	S100a4	-0.263004	-0.583391	0.388218	-0.666704	826	-1.66551	0.0577762	0.00159065	0.0105992	1	-1.50318	-1.35003	-2.14333
PG3139	Q1W5W7;Q8C2B1;P12894;Q0VGN5;Q61705;Q61706;Q7TQ37		gag-pol;BC094435;pol	-1.96121	-0.273806			827	-2.42078	0.0201672	0.00159505	0.0106157	1	-2.59278		-2.24878
PG0061	X1WI19;A0A0A0MQ88;Q8BTD8;Q8K4R4-3;Q8K4R4-2;Q8K4R4;Q8K4R4-4	Cytoplasmic phosphatidylinositol transfer protein 1	Pitpnc1	0.659859	0.0483593	-0.782762	0.0286247	828	-1.75592	0.0523256	0.00159905	0.0106294	1	-1.44596	-2.29682	-1.52499
PG1409	E9PWQ3;J3QQ16;A0A087WS16;O88493;D3YWD1;Q9Z0I9		Col6a3	-0.369908	0.265813	0.450619	0.377576	829	1.53731	0.807958	0.00160242	0.0106328	1	1.13767	1.77812	1.69614
PG4575	Q8BGA5;G3UZA0	KRR1 small subunit processome component homolog	Krr1	-0.541177	0.493607	0.640536	0.669298	830	1.90748	0.881359	0.00160464	0.0106328	1	1.27662	2.24218	2.20363
PG3663	Q3UFY7;Q3UFY7-2;Q3UFY7-4;A0A0R4J146	7-methylguanosine phosphate-specific 5-nucleotidase	Nt5c3b	0.16559	0.0405951	-0.181858	0.0593655	831	1.26843	0.743641	0.00160679	0.0106328	1	1.30404	1.12388	1.37737
PG0853	B2RPS1;Q0PD56;P61021;Q8C458	Ras-related protein Rab-5B	Rab5b	-0.527819	-0.784878	0.725834	-0.89087	832	2.10792	0.910792	0.00160729	0.0106328	1	2.23983	2.67295	1.41099
PG3672	Q3UGC1;Q8C079-3;Q8C079;Q8C079-4	Striatin-interacting protein 1	Strip1	-0.922671	0.571324	1.09769	0.795107	833	2.45023	0.943677	0.00160986	0.0106371	1	1.55817	3.07507	2.71746
PG0650	A2ASX2;Q9JLM9	Growth factor receptor-bound protein 14	Grb14	-0.322281	-0.742027	0.472806	-0.855334	834	1.88935	0.876999	0.00161735	0.0106737	1	2.11194	2.28209	1.27402
PG5620	Q9CQK7	RWD domain-containing protein 1	Rwdd1	-0.395243	-1.89973			835	2.30182	0.931868	0.00162811	0.0107319	1	2.39984	2.20381
PG0511	A2A4Z0;Q9D1C1;A2A4Z1;Q3UWQ1	Ubiquitin-conjugating enzyme E2 C	Ube2c	-0.226284	-0.347671	0.324903	-0.382237	836	1.40646	0.780342	0.00163784	0.0107599	1	1.45027	1.64817	1.12094
PG2998	P97770-2;P97770;P97770-3	THUMP domain-containing protein 3	Thumpd3	-0.758626	0.198716	0.928043	0.327376	837	1.94985	0.88899	0.00163867	0.0107599	1	1.37047	2.51387	1.96521
PG2429	Q6P5I3;P28474	S-(hydroxymethyl)glutathione dehydrogenase;Alcohol dehydrogenase class-3	Adh5	-0.366948	0.0440338	0.464635	0.106881	838	-1.4164	0.0777616	0.00163928	0.0107599	1	-1.68336	-1.13615	-1.4297
PG1020	B9EIV8;Q9WVL3;Q9WVL3-2	Solute carrier family 12 member 7	Slc12a7	0.740661	1.73828			839	-2.35007	0.0232558	0.00164018	0.0107599	1	-2.20943	-2.49071
PG0443	F6TCF9;A0A1L1SRT0;Q60739-2;Q60739;Q9CUY1	BAG family molecular chaperone regulator 1	Bag1	0.00163442	-0.164497	0.0335518	-0.177401	840	-1.231	0.100836	0.00164384	0.0107682	1	-1.16676	-1.2059	-1.32032
PG3931	Q52KR3-6;Q52KR3	Protein prune homolog 2	Prune2	-0.533368	0.57476	0.624607	0.767627	841	1.97449	0.892624	0.00164536	0.0107682	1	1.3001	2.28766	2.33571
PG4221	Q69ZW3-2;Q69ZW3	EH domain-binding protein 1	Ehbp1	-1.16325	1.44671			842	2.31742	0.933503	0.00165217	0.0107877	1		2.19698	2.43786
PG4162	Q62084	Protein phosphatase 1 regulatory subunit 14B	Ppp1r14b	0.234729	-0.162071	-0.249733	-0.193406	843	1.30262	0.752725	0.00165226	0.0107877	1	1.49696	1.14103	1.26986
PG4678	Q8BLF1	Neutral cholesterol ester hydrolase 1	Nceh1	0.172997	0.0664575	-0.192906	0.0903015	844	1.26947	0.744186	0.00165916	0.0108199	1	1.29398	1.11413	1.40031
PG4216	Q69ZJ6;Q9WV91	Prostaglandin F2 receptor negative regulator	Ptgfrn	0.46019	1.7354			845	-2.24801	0.0274346	0.00166582	0.0108505	1	-2.29797	-2.19805
PG5174	Q8R5H1;Q8R5H1-5;Q8R5H1-2	Ubiquitin carboxyl-terminal hydrolase 15	Usp15	-0.152148	-0.250939	0.227184	-0.270305	846	1.2989	0.751999	0.00167165	0.0108645	1	1.32741	1.46315	1.10614
PG6179	Q9QZ06;A9JEI5;F7AT44;Q8BQL7;Q8C5G6	Toll-interacting protein	Tollip	-0.0978445	0.356318	0.113012	0.465812	847	-1.44144	0.075218	0.00167192	0.0108645	1	-1.741	-1.43504	-1.14827
PG5818	Q9D168	Integrator complex subunit 12	Ints12	1.0223	-0.156456	-1.20669	-0.250628	848	2.2753	0.929324	0.00167402	0.0108653	1	2.9108	1.48345	2.43165
PG3424	Q3TVW1;Q8R1X6;Q8R1X6-2;D3Z3F8	Spartin	Spg20	-0.0309533	-0.330754	0.0863316	-0.377497	849	-1.31633	0.0906613	0.00167856	0.0108715	1	-1.17228	-1.23386	-1.54286
PG4018	Q5M9J2;Q9D0S9	Histidine triad nucleotide-binding protein 2, mitochondrial	Hint2	0.33925	0.0780144	-0.395739	0.0908701	850	1.38107	0.772711	0.00168013	0.0108715	1	1.49258	1.09072	1.5599
PG4073	Q5SYD0;Q5SYD0-2;B2RWZ2;Q3UG58	Unconventional myosin-Id	Myo1d	-0.616298	0.546622	0.727559	0.74006	851	2.0196	0.898983	0.00168279	0.0108715	1	1.31503	2.40433	2.33944
PG1274	D3Z4S3	Putative peptidyl-tRNA hydrolase PTRHD1	Ptrhd1	1.83341	0.643075			852	2.38586	0.93968	0.00168288	0.0108715	1	2.21152		2.5602
PG5926	Q9D8Z1;Q3UMX8	Activating signal cointegrator 1 complex subunit 1	Ascc1	-0.359001	0.806755	0.394417	1.03635	853	2.1174	0.911519	0.00169172	0.0109158	1	1.40436	2.24753	2.7003
PG3742	Q3ULL6;Q9CS15;Q80UI8;Q149I6;F6Q8N5		Upf3b	0.84634	-0.256869	-0.985004	-0.358764	854	2.02392	0.899346	0.00169501	0.0109213	1	2.61943	1.39158	2.06076
PG1148	D3YWT0;D3Z569;D3YTS1;Q9R0P6;Q6PET3	Signal peptidase complex catalytic subunit SEC11;Signal peptidase complex catalytic subunit SEC11A	Sec11a	0.185942	0.0269991	-0.205496	0.0411298	855	-1.25822	0.097202	0.00169652	0.0109213	1	-1.2031	-1.41647	-1.1551
PG1879	Q8BIC1;Q80XN4;G5E905;Q80T67		Zfp871	-0.0203269	-0.190612	0.0622975	-0.207462	856	1.23108	0.736737	0.00170091	0.0109367	1	1.29835	1.27865	1.11626
PG3459	Q3TY95;Q60823;F8WHG5;D3YXM7;D3Z3N2;Q8CE74	RAC-beta serine/threonine-protein kinase	Akt2	-0.223673	-0.293433	0.317426	-0.316307	857	-1.35388	0.087391	0.00170723	0.0109645	1	-1.34063	-1.12447	-1.59652
PG1038	B9EKS2;Q6ZPY7;Q6ZPY7-2	Lysine-specific demethylase 3B	Kdm3b	-0.110475	-0.556369	0.200826	-0.64616	858	1.53958	0.808503	0.00171348	0.0109918	1	1.77203	1.7281	1.1186
PG1988	Q3UH86;O08919	Numb-like protein	Numbl	1.75097	0.461422			859	2.23569	0.925327	0.0017169	0.0110003	1	2.17218		2.2992
PG5945	Q9DAX9	Amyloid protein-binding protein 2	Appbp2	1.1916	-1.43728			860	-2.23148	0.0281613	0.0017188	0.0110003	1		-2.17333	-2.28964
PG3399	Q3TT85;Q9WU56-2;Q9WU56;H7BX59;Q9WU56-3;Q9WU56-4	tRNA pseudouridine synthase;tRNA pseudouridine synthase A, mitochondrial	Pus1	0.0265716	-0.318536	0.0154977	-0.367277	861	-1.29818	0.0935683	0.00172082	0.0110005	1	-1.12888	-1.26397	-1.50169
PG3195	Q3TC93	HCLS1-binding protein 3	Hs1bp3	0.445601	0.101286	-0.526749	0.110597	862	1.48169	0.797057	0.00172289	0.0110009	1	1.63947	1.102	1.70361
PG2209	O89116	Vesicle transport through interaction with t-SNAREs homolog 1A	Vti1a	0.208564	0.0727203	-0.236601	0.0950453	863	1.27767	0.746911	0.00172508	0.0110021	1	1.31856	1.09273	1.42173
PG4234	Q6A0D1;Q9CRD2	ER membrane protein complex subunit 2	Emc2	0.115582	0.0869267	-0.124802	0.119934	864	-1.24142	0.0992006	0.00173049	0.0110056	1	-1.2614	-1.35475	-1.10811
PG4094	Q60676;F7BX26	Serine/threonine-protein phosphatase 5;Serine/threonine-protein phosphatase	Ppp5c	-0.36833	0.0418727	0.466485	0.104358	865	-1.39852	0.0801235	0.00173068	0.0110056	1	-1.66498	-1.11675	-1.41382
PG3280	Q3THU8;Q8VEM8;Q3UB63;Q3U995;G5E902	Phosphate carrier protein, mitochondrial	Slc25a3	-0.0877148	-0.26397	0.149965	-0.291438	866	1.27266	0.745458	0.00173162	0.0110056	1	1.34523	1.38789	1.08486
PG6201	Q9R0E1	Procollagen-lysine,2-oxoglutarate 5-dioxygenase 3	Plod3	-0.428311	-0.0792097	0.548946	-0.0384195	867	-1.44764	0.074673	0.00173637	0.0110222	1	-1.67643	-1.09513	-1.57136
PG4682	Q8BLX7;Q8K388;E9Q0X4	Collagen alpha-1(XVI) chain	Col16a1	0.431647	0.632568	-0.55199	0.759619	868	-1.91535	0.043423	0.00173824	0.0110222	1	-2.07929	-2.38405	-1.28272
PG3137	Q3TWP9;Q3TM70;Q1MWP9;Q9EQP2;Q1MWP8;Q91VL7;Q3TQ74	EH domain-containing protein 4	Ehd4	0.19048	-0.111812	-0.199984	-0.128516	869	1.24903	0.740371	0.00174201	0.0110334	1	1.38871	1.11332	1.24505
PG1532	E9Q668;O08665	Semaphorin-3A	Sema3a	-0.709045	0.69402	0.828496	0.927353	870	2.26228	0.928052	0.00174556	0.0110392	1	1.41829	2.69332	2.67522
PG2283	Q8VH34;Q3TX84;Q3TA96;Q9DC13;P11438;Q922T9	Lysosome-associated membrane glycoprotein 1	Lamp1	-0.125759	0.264943	0.15417	0.356654	871	-1.35284	0.0875727	0.00174694	0.0110392	1	-1.61418	-1.30692	-1.13742
PG0156	A0A0J9YU62;O88712-2;O88712;A0A0J9YUM4;O88712-3	C-terminal-binding protein 1	Ctbp1	0.18412	-0.546672	-0.157729	-0.6583	872	1.54137	0.809411	0.00174943	0.0110418	1	1.93435	1.49271	1.19705
PG5352	Q91XL9;Q3V156;Q6PG70;Q91XL9-3;Q91XL9-2;Q3UZK3	Oxysterol-binding protein-related protein 1;Oxysterol-binding protein	Osbpl1a	0.420639	-0.225944	-0.470448	-0.28642	873	1.45886	0.792878	0.00175136	0.0110418	1	1.79585	1.16078	1.41993
PG1805	G3UZK1;Q9CXP8	Guanine nucleotide-binding protein subunit gamma;Guanine nucleotide-binding protein G(I)/G(S)/G(O) subunit gamma-10	Gm20503;Gng10	-0.296644	-1.98054			874	2.3616	0.937137	0.0017714	0.0111509	1	2.54308	2.18012
PG3444	Q3TXK6;Q9QZE7;A0A1D5RLR0	Translin-associated protein X	Tsnax	-0.192864	-0.581521	0.302885	-0.67013	875	-1.58428	0.0639535	0.00177272	0.0111509	1	-1.38346	-1.32519	-2.04418
PG2775	P61965;F6Q3W0;Q3UNQ3	WD repeat-containing protein 5	Wdr5	-0.258455	0.265739	0.315265	0.368419	876	1.4134	0.782885	0.00177944	0.0111804	1	1.0767	1.56519	1.59832
PG4683	Q8BLY2	Probable threonine--tRNA ligase 2, cytoplasmic	Tarsl2	-0.540251	0.127049	0.668519	0.222214	877	-1.5925	0.0630451	0.00180815	0.0113479	1	-2.0063	-1.18944	-1.58176
PG2460	Q99LA8;P31428;A0A1D5RM32;A0A1D5RML1	Dipeptidase;Dipeptidase 1	Dpep1	0.746748	1.03796	-0.96687	1.22835	878	-2.69671	0.0132631	0.0018117	0.0113571	1	-2.92229	-3.49356	-1.67428
PG4592	Q8BGT5	Alanine aminotransferase 2	Gpt2	-0.10877	0.349507	0.126821	0.458396	879	1.40871	0.781068	0.00181694	0.011377	1	1.107	1.42512	1.69401
PG5196	Q8VCH6	Delta(24)-sterol reductase	Dhcr24	-0.17279	0.951179	0.156796	1.19733	880	2.20938	0.92242	0.00181903	0.0113772	1	1.51612	2.16352	2.94849
PG3745	Q543K5;Q3ULZ3;Q99K85;Q8BTJ1;Q3U6K9	Phosphoserine aminotransferase	Psat1	0.127267	-0.108535	-0.123473	-0.119378	881	1.20767	0.731831	0.0018229	0.0113869	1	1.30974	1.12185	1.19142
PG3863	Q543X5;Q3V231;Q60809;Q3TLK9	CCR4-NOT transcription complex subunit 7	Cnot7	0.155298	0.202406	-0.182207	0.257527	882	-1.29934	0.0932049	0.00182472	0.0113869	1	-1.36512	-1.46617	-1.06672
PG5922	Q9D8V0;A3KGR9;Q9D8V0-4;Q9D8V0-3	Minor histocompatibility antigen H13	Hm13;H13	0.216994	-1.02545	-0.159636	-1.24483	883	2.17319	0.91806	0.00182933	0.0113921	1	2.86754	2.18851	1.4635
PG5372	Q91YR5;Q3TRF3;Q91YR5-1	Methyltransferase-like protein 13	Mettl13	-0.0881105	0.168074	0.116138	0.235462	884	-1.25951	0.0970203	0.0018297	0.0113921	1	-1.44238	-1.2254	-1.11074
PG6235	Q9WUP4;F6WPW1;Q05DH9;Q9WUP4-2	Polyprenol reductase	Srd5a3	-0.357046	-1.85716			885	2.23864	0.926054	0.00183561	0.011416	1	2.35413	2.12314
PG2436	Q68FM4;P28828	Protein-tyrosine-phosphatase;Receptor-type tyrosine-protein phosphatase mu	Ptprm	1.93303	0.828591			886	2.55769	0.951308	0.00184295	0.0114398	1	2.2727		2.84267
PG0718	A4FUQ6;Q8CD26	Solute carrier family 35 member E1	Slc35e1	-0.349612	-0.145774	0.458652	-0.125995	887	-1.36003	0.0859375	0.00184522	0.0114398	1	-1.50508	-1.05784	-1.51716
PG1912	H9KV05;Q99JN2;Q99JN2-2;Q8CDC1	Kelch-like protein 22	Klhl22	-0.184593	-0.144918	0.258169	-0.138376	888	1.24182	0.738735	0.00184566	0.0114398	1	1.18939	1.412	1.12406
PG5546	Q99NB8	Ubiquilin-4	Ubqln4	0.139659	-0.093499	-0.139716	-0.10205	889	-1.20534	0.103379	0.00185209	0.0114552	1	-1.10516	-1.3039	-1.20697
PG0254	A0A0R4J0L6;Q8BJZ4	28S ribosomal protein S35, mitochondrial	Mrps35	0.117875	0.420178	-0.15405	0.526139	890	1.47237	0.794876	0.00185263	0.0114552	1	1.25683	1.29439	1.8659
PG5266	Q8VHG2;F6QYS7;Q8VHG2-2;F6YMV1;A0A067XG49;B1AXE9	Angiomotin	Amot	-1.18713	1.25005			891	2.16338	0.916424	0.00185585	0.0114552	1		2.15043	2.17632
PG5598	Q9CQ85;E9PXB9;Z4YN86;B0QZS8	Mitochondrial import inner membrane translocase subunit Tim22	Timm22	0.055396	-0.457534	-0.00847191	-0.539126	892	1.39339	0.776708	0.00185648	0.0114552	1	1.66107	1.43077	1.08833
PG6057	Q9ER72;Q3UXN3;Q3U716;Q9ER72-2	Cysteine--tRNA ligase, cytoplasmic	Cars	0.0629889	-0.0287362	-0.0517434	-0.0168357	893	1.18155	0.725472	0.00186054	0.0114674	1	1.20021	1.13203	1.2124
PG6151	Q9JMH6-2;Q9JMH6;Q91Y95	Thioredoxin reductase 1, cytoplasmic	Txnrd1	-0.153938	-0.106958	0.217925	-0.0945787	894	1.21602	0.734193	0.00186584	0.0114782	1	1.15846	1.35456	1.13503
PG5685	Q9CU65	Zinc finger MYM-type protein 2	Zmym2	-1.10608	1.58198			895	2.38888	0.939862	0.00186646	0.0114782	1		2.17345	2.60432
PG2227	P05201	Aspartate aminotransferase, cytoplasmic	Got1	-0.170212	0.176016	0.215219	0.251826	896	1.28693	0.749455	0.00187044	0.0114885	1	1.05303	1.38513	1.42263
PG5048	Q8K2C7-2;Q8K2C7;Q922S5	Protein OS-9	Os9	0.221363	-0.243206	-0.227058	-0.29126	897	1.28732	0.749637	0.0018723	0.0114885	1	1.52206	1.15171	1.18821
PG0871	B2RR83	Probable ATP-dependent RNA helicase YTHDC2	Ythdc2	-0.206239	-0.402061	0.304878	-0.450195	898	1.39078	0.775618	0.00188149	0.0115186	1	1.47803	1.62673	1.06758
PG4385	Q6ZQH4;Q91YK2	Ribosomal RNA processing protein 1 homolog B	Rrp1b	0.110817	0.124028	-0.121961	0.165565	899	-1.23037	0.101017	0.00188221	0.0115186	1	-1.27496	-1.34689	-1.06927
PG5492	Q99KU0;Q5SXR2	Vacuole membrane protein 1	Vmp1	-0.110938	-0.138514	0.168207	-0.136558	900	-1.20274	0.103743	0.00188349	0.0115186	1	-1.21739	-1.09261	-1.29823
PG4728	Q8BS95	Golgi pH regulator	Gpr89a	-0.185691	-0.620623	0.297277	-0.718397	901	-1.60138	0.0621366	0.00188999	0.01154	1	-1.37342	-1.34065	-2.09007
PG4155	Q61768;E9QAK5	Kinesin-1 heavy chain;Kinesin-like protein	Kif5b	-0.325806	-0.0665787	0.423452	-0.031355	902	1.32013	0.758358	0.00189349	0.01154	1	1.14173	1.58837	1.2303
PG1008	B9EHJ3;P39447;A0A0U1RPW2	Tight junction protein ZO-1	Tjp1	0.0176947	0.0937077	-0.00645682	0.136166	903	-1.20029	0.104106	0.00189487	0.01154	1	-1.27952	-1.2367	-1.08465
PG6049	Q9EQM6	Microprocessor complex subunit DGCR8	Dgcr8	-0.372786	-0.755111	0.535184	-0.867182	904	1.86522	0.872275	0.00189929	0.01154	1	2.06704	2.30078	1.22785
PG0401	A0A1B0GR84;Q9D938	Transmembrane protein 160	Tmem160	0.614673	-0.294976	-0.700619	-0.386389	905	-1.67486	0.056686	0.00189949	0.01154	1	-1.18758	-2.11494	-1.72206
PG2277	P11031	Activated RNA polymerase II transcriptional coactivator p15	Sub1	-0.549946	-1.39566	0.801208	-1.6339	906	2.8881	0.97311	0.00190123	0.01154	1	3.36832	3.58594	1.71004
PG5075	Q8K3C3	Protein LZIC	Lzic	-0.580304	-0.441188	0.762285	-0.467478	907	1.73807	0.850109	0.00190167	0.01154	1	1.63733	2.28024	1.29663
PG1006	B8ZXI1;Z4YJE9;B8ZXI1-2	Queuine tRNA-ribosyltransferase subunit QTRTD1	Qtrtd1	0.0397338	-0.370362	0.00362759	-0.431548	908	1.30532	0.754179	0.0019083	0.0115567	1	1.51266	1.33878	1.06451
PG1538	E9Q6R7;O08614		Utrn	-0.322893	-0.0262923	0.416715	0.0175362	909	1.31559	0.757267	0.00190862	0.0115567	1	1.11504	1.57391	1.25783
PG3448	Q3U5X7;Q3TXN3;Q921V5;Q3TBY6	Alpha-1,6-mannosyl-glycoprotein 2-beta-N-acetylglucosaminyltransferase	Mgat2	0.112611	0.259445	-0.134893	0.330557	910	1.31047	0.755451	0.00191576	0.0115872	1	1.1869	1.16699	1.57752
PG1289	Q6P395;Q3TN06;Q3U049;D3Z6D5;Q6TYB5	Fasciculation and elongation protein zeta-2	Fez2	-1.1116	1.36054			911	2.19735	0.920785	0.00191927	0.011589	1		2.09191	2.30279
PG0509	Q3UQQ4;Q5DTN5;A2A4P0;A2A4N9	ATP-dependent RNA helicase DHX8	Dhx8	-0.332634	-1.85574			912	2.22838	0.9246	0.00192027	0.011589	1	2.36023	2.09653
PG3218	Q4V9T7;Q3TDK9;Q99K95;Q3TEK4;A4QMY9;A1L0V7	Protein RTF2 homolog	Rtfdc1	-1.36313	1.14759			913	2.22157	0.923328	0.00192393	0.0115935	1		2.34915	2.094
PG4744	Q8BTV2-2;Q8BTV2;Q8BTV2-3	Cleavage and polyadenylation specificity factor subunit 7	Cpsf7	0.420468	0.0447938	-0.491739	0.0437512	914	1.4006	0.778888	0.00192523	0.0115935	1	1.57757	1.05163	1.5726
PG5148	Q8R3F9	Speckle targeted PIP5K1A-regulated poly(A) polymerase	Tut1	-0.0617662	-0.514896	0.138376	-0.599547	915	1.43984	0.788881	0.00193334	0.0116296	1	1.67528	1.58164	1.0626
PG2477	Q545F0;P34884	Macrophage migration inhibitory factor	Mif	0.031233	-0.119278	-0.00598622	-0.124665	916	1.17199	0.722929	0.00193673	0.0116339	1	1.22622	1.16492	1.12485
PG1843	Q3ZAS1;Q3U015;G3X9W4;P49117;Q5DTL3;Q3ZAR9	Nuclear receptor subfamily 2 group C member 2	Nr2c2	-1.09593	1.41749			917	2.23454	0.924964	0.00193829	0.0116339	1		2.09345	2.37563
PG5026	Q8K1I7;Q3THY1	WAS/WASL-interacting protein family member 1	Wipf1	0.56873	0.110822	-0.677046	0.11221	918	1.57783	0.818677	0.00194084	0.0116366	1	1.79946	1.09796	1.83606
PG5555	Q9CPP6;Q9CX78	NADH dehydrogenase [ubiquinone] 1 alpha subcomplex subunit 5	Ndufa5	-1.29302	1.15488			919	2.16869	0.917515	0.00195268	0.011684	1		2.25651	2.08087
PG5329	Q91WG4;Q91WG4-2;Q8C8Q3	Elongator complex protein 2	Elp2	0.0894172	0.0593497	-0.0908351	0.088433	920	1.18842	0.728016	0.00195592	0.011684	1	1.16996	1.10119	1.29411
PG3685	Q3UH60;B2RQC7;D3Z5G8;Q3UH60-2	Disco-interacting protein 2 homolog B	Dip2b	-0.248093	0.307448	0.299368	0.418439	921	-1.40691	0.0786701	0.00195821	0.011684	1	-1.7624	-1.27126	-1.18706
PG2246	Q8K173;Q7TT32;Q3UH72;Q3TVI5;Q5DTG2;P08121;Q8BLW4;Q8BKY2	Collagen alpha-1(III) chain	Col3a1	1.90724	-1.32207			922	-2.7352	0.0118096	0.00195859	0.011684	1		-3.1026	-2.36781
PG0645	A2ARP8;Q9QYR6;Q9QYR6-2	Microtubule-associated protein 1A;MAP1A heavy chain;MAP1 light chain LC2	Map1a	-0.311881	0.16931	0.387809	0.255173	923	1.35664	0.766533	0.00195936	0.011684	1	1.04675	1.56929	1.45388
PG3581	Q9D094;Q8C2D1;Q3UDH1;Q3U890;Q61035	Histidine--tRNA ligase, cytoplasmic	Hars	-0.170211	-0.215308	0.246293	-0.225385	924	1.23911	0.738009	0.00196795	0.0117225	1	1.23637	1.41107	1.06988
PG1047	Q3U7U8;C5H0E8;P62835;A0A0G2JDL9;A0A0G2JE52;Q3V3W9;C5H0E9	Ras-related protein Rap-1A	Rap1a;Gm9392	2.30578	-0.0481021			925	2.7565	0.964208	0.00197534	0.0117538	1	3.13349		2.37952
PG1233	D3Z030;Q6EDY6-3;Q6EDY6;F7AI27	Leucine-rich repeat-containing protein 16A	Lrrc16a	0.00192427	0.0661059	0.0148882	0.10379	926	-1.17767	0.106831	0.00197801	0.011757	1	-1.24949	-1.19627	-1.08723
PG1615	E9QLS6;Q6PF93-2;Q6PF93;D3YZ98;E9Q824	Phosphatidylinositol 3-kinase;Phosphatidylinositol 3-kinase catalytic subunit type 3	Pik3c3	0.105638	0.28316	-0.128307	0.360045	927	1.31642	0.757631	0.00198293	0.0117715	1	1.17491	1.17404	1.60031
PG1296	D3Z780;Q61749;Q61749-2	Translation initiation factor eIF-2B subunit delta	Eif2b4	-0.287186	-0.0623606	0.376212	-0.029353	928	1.27333	0.74564	0.00198938	0.0117715	1	1.11423	1.50991	1.19584
PG2323	P16045	Galectin-1	Lgals1	0.162667	0.0946414	-0.182599	0.125511	929	1.21913	0.73492	0.00199173	0.0117715	1	1.22116	1.06672	1.3695
PG2940	Q544D4;P82347;A2ACH6;Q8C8D9	Delta-sarcoglycan	Sgcd	-0.619323	0.695205	0.719434	0.9215	930	2.0994	0.908794	0.00199252	0.0117715	1	1.30535	2.45854	2.53432
PG5814	Q9D0R9	WD repeat-containing protein 89	Wdr89	0.206071	0.016112	-0.229077	0.0262158	931	1.21758	0.734557	0.0019934	0.0117715	1	1.2905	1.04531	1.31694
PG5017	Q8K124	Pleckstrin homology domain-containing family O member 2	Plekho2	0.0350233	0.0137364	-0.021152	0.0372336	932	1.16313	0.721475	0.00199558	0.0117715	1	1.14092	1.12795	1.22052
PG2423	P27773	Protein disulfide-isomerase A3	Pdia3	-0.100938	0.0691572	0.139572	0.115878	933	-1.19135	0.105378	0.00199975	0.0117715	1	-1.32303	-1.12835	-1.12267
PG5702	Q9CWY3	N-lysine methyltransferase SETD6	Setd6	0.267209	0.181335	-0.316449	0.222728	934	-1.31554	0.0910247	0.00200059	0.0117715	1	-1.30572	-1.56781	-1.07309
PG3539	Q3U487	E3 ubiquitin-protein ligase HECTD3	Hectd3	-0.342211	0.0158824	0.436827	0.0705388	935	1.32101	0.759084	0.00200362	0.0117715	1	1.08464	1.58681	1.29159
PG4599	Q8BH24;Q14B57	Transmembrane 9 superfamily member 4	Tm9sf4	-0.388859	0.128041	0.484574	0.211108	936	-1.39483	0.0806686	0.00200629	0.0117715	1	-1.72378	-1.11291	-1.34781
PG4043	Q5SFM8-2;Q5SFM8;Q5SFM8-3	RNA-binding protein 27	Rbm27	-0.163423	-0.387932	0.251755	-0.436448	937	1.33773	0.762173	0.00200649	0.0117715	1	1.4408	1.53681	1.03558
PG0889	Q8C4Y1;B2RS19;P28574	Protein max	Max	0.591548	0.111507	-0.704813	0.111188	938	1.59216	0.821403	0.00200694	0.0117715	1	1.82627	1.09394	1.85628
PG5981	Q9DBU8;Q9JKC8;H7BWY2	AP-3 complex subunit mu-1	Ap3m1	-0.0384758	0.02246	0.0674197	0.053851	939	1.16464	0.721839	0.00200825	0.0117715	1	1.0958	1.18654	1.21159
PG5836	Q9D1M4	Eukaryotic translation elongation factor 1 epsilon-1	Eef1e1	0.106188	0.740371	-0.165281	0.917558	940	1.83145	0.865189	0.0020255	0.0118506	1	1.42016	1.60244	2.47173
PG3440	Q3TWY6;Q9Z160;Q3TR89;Q3U7X8;Q3TYM3;Q3TAY0;Q810S7	Conserved oligomeric Golgi complex subunit 1	Cog1	0.247093	-0.550019	-0.233943	-0.667504	941	1.51876	0.804142	0.00202605	0.0118506	1	1.94925	1.42043	1.1866
PG3949	Q543B9;Q9QUR6;Q3TCS0;Q8C6A3;Q3TQ97	Prolyl endopeptidase	Prep	-0.132898	-0.0770744	0.189999	-0.0598475	942	1.17917	0.724927	0.0020299	0.0118605	1	1.11584	1.29527	1.12641
PG4783	Q8BX10;B7ZNW0;A1A4A7;Q8BX10-2;A0A0G2JG95	Serine/threonine-protein phosphatase PGAM5, mitochondrial	Pgam5	-0.225225	0.0776298	0.289845	0.136321	943	-1.24452	0.0986555	0.00203894	0.0119007	1	-1.45135	-1.08383	-1.1984
PG2599	Q99L69;Q3U3J1;P50136	2-oxoisovalerate dehydrogenase subunit alpha, mitochondrial	Bckdha	0.363517	0.0840614	-0.425691	0.0962702	944	-1.33615	0.0893895	0.0020584	0.0120015	1	-1.21451	-1.64702	-1.14691
PG4717	Q8BQ47;D3Z0T5	Protein canopy homolog 4	Cnpy4	0.0237553	0.483525	-0.0447719	0.611046	945	-1.48881	0.0710392	0.002066	0.0120331	1	-1.79489	-1.60354	-1.06799
PG5530	Q99M71	Mammalian ependymin-related protein 1	Epdr1	-0.145333	0.169604	0.185513	0.241982	946	-1.2407	0.0993823	0.00207256	0.0120379	1	-1.45677	-1.16117	-1.10416
PG5857	Q9D2Y4-2;Q9D2Y4	Mixed lineage kinase domain-like protein	Mlkl	0.237727	-0.0454483	-0.262635	-0.0514308	947	-1.21803	0.101926	0.00207358	0.0120379	1	-1.09089	-1.404	-1.15922
PG0717	Q3U3A7;E9Q794;A4FTZ3;Q6ZPV1;Q3UII8;Q3UKM9;Q924K8-2;Q924K8;Q3TY62;H3BLE1	Metastasis-associated protein MTA3	Mta3	-0.315094	-0.972372	0.482369	-1.13682	948	2.07634	0.905523	0.00207532	0.0120379	1	2.43906	2.50676	1.2832
PG4680	Q8BLN5	Lanosterol synthase	Lss	-0.194844	0.329938	0.232912	0.441534	949	1.37765	0.771621	0.00207557	0.0120379	1	1.03892	1.46651	1.62751
PG4645	Q8BJ05;Q8BJ05-2;Q8BJ05-3	Zinc finger CCCH domain-containing protein 14	Zc3h14	0.0128427	-0.279315	0.0290569	-0.318331	950	1.21402	0.733648	0.00207791	0.0120387	1	1.35241	1.25181	1.03786
PG4087	Q5Y5T1-2;Q5Y5T1	Probable palmitoyltransferase ZDHHC20	Zdhhc20	-0.134003	-0.869116	0.254235	-1.02563	951	1.86322	0.87173	0.00208317	0.0120565	1	2.26714	2.1295	1.19302
PG2116	O70152;A2BDX2	Dolichol-phosphate mannosyltransferase subunit 1	Dpm1	0.118094	0.104401	-0.12924	0.141039	952	-1.19282	0.105196	0.00208877	0.0120763	1	-1.22171	-1.31146	-1.0453
PG0914	B2RUA5;Q7TSI3	Serine/threonine-protein phosphatase 6 regulatory subunit 1	Ppp6r1	-0.568324	-0.154116	0.72494	-0.118375	953	-1.5474	0.065952	0.00209225	0.0120837	1	-1.81096	-1.06892	-1.76234
PG3756	Q3UMR9;Q3UZU9;Q9JKZ2	Sodium/myo-inositol cotransporter	Slc5a3	-0.16233	1.07451	0.134299	1.34687	954	2.31432	0.93314	0.00210101	0.0121216	1	1.55411	2.23686	3.152
PG0880	B2RRN5;Q3ULK1;P56371	Ras-related protein Rab-4A	Rab4a	0.537187	1.57505			955	-2.08769	0.0336119	0.00210366	0.0121241	1	-2.05291	-2.12246
PG5272	Q8VHY0;Q8VHY0-3	Chondroitin sulfate proteoglycan 4	Cspg4	1.25932	-1.19942	-1.41172	-1.54177	956	3.22544	0.985647	0.00211271	0.0121636	1	4.6108	2.44084	2.6247
PG1365	E9PUB0;Q4LDD4-3;Q4LDD4-2;Q4LDD4	Arf-GAP with Rho-GAP domain, ANK repeat and PH domain-containing protein 1	Arap1	-0.510169	0.357054	0.61372	0.500253	957	-1.63207	0.0606831	0.00211967	0.0121827	1	-2.16477	-1.2964	-1.43505
PG4549	Q810A7;Q810A7-2	ATP-dependent RNA helicase DDX42	Ddx42	-0.0462959	-0.248788	0.0984564	-0.276294	958	-1.19475	0.104833	0.00212046	0.0121827	1	-1.10777	-1.11547	-1.361
PG4417	Q7TPT7;Q790I0;Q9Z1Q9;Q3U3D3;G3UY93;Q3TII4	Valine--tRNA ligase	Vars	-0.202394	-0.157966	0.280825	-0.15284	959	1.21119	0.732558	0.00213218	0.0122279	1	1.15642	1.39805	1.07909
PG6170	Q9QYE6	Golgin subfamily A member 5	Golga5	0.326818	0.225563	-0.392356	0.271814	960	1.36224	0.76726	0.00213474	0.0122279	1	1.37957	1.05401	1.65313
PG3598	Q3U962	Collagen alpha-2(V) chain	Col5a2	1.36486	-1.20569			961	-2.17294	0.0299782	0.002135	0.0122279	1		-2.31637	-2.02951
PG5358	Q91YD3;Q3TAP6	mRNA-decapping enzyme 1A	Dcp1a	-0.871565	-1.80193			962	2.35511	0.936592	0.0021403	0.0122455	1	2.10878	2.60143
PG3781	Q3UR91;Q3TQ29;Q80U58-2;Q80U58;Q80U58-3;Q3TTH9	Pumilio homolog 2	Pum2	0.493795	-0.431487	-0.542974	-0.543027	963	1.57647	0.818132	0.00214877	0.0122691	1	2.07618	1.2587	1.39455
PG5082	Q8K4Q8	Collectin-12	Colec12	0.40786	0.0981091	-0.480661	0.109794	964	1.36594	0.768532	0.00214997	0.0122691	1	1.5043	1.017	1.57653
PG6249	Q9WVH9	Fibulin-5	Fbln5	-1.08886	1.26336			965	2.09199	0.906977	0.00215111	0.0122691	1		2.02182	2.16215
PG0964	B2RXT3;E9Q7L0		Ogdhl	-0.437508	0.321961	0.52826	0.451547	966	1.52871	0.805414	0.00215606	0.0122804	1	1.05775	1.81295	1.71543
PG4182	Q62432-2;Q62432;E9Q3M0;E9Q5P9	Mothers against decapentaplegic homolog 2;Mothers against decapentaplegic homolog	Smad2	-0.126222	-0.0452125	0.179361	-0.0215358	967	1.15826	0.720385	0.00215755	0.0122804	1	1.07988	1.26302	1.13189
PG3869	Q3V455;Q3V449;Q9EPA7;B0QZL2	Nicotinamide-nucleotide adenylyltransferase;Nicotinamide/nicotinic acid mononucleotide adenylyltransferase 1	Nmnat1	1.28899	-1.21086			968	-2.11329	0.0321584	0.00216901	0.0123121	1		-2.21502	-2.01156
PG5327	Q91WE4	UPF0729 protein C18orf32 homolog		-0.759244	-1.72475			969	2.22538	0.924055	0.0021742	0.0123121	1	2.04009	2.41066
PG5076	Q8K3H0	DCC-interacting protein 13-alpha	Appl1	-0.0123981	-0.218459	0.0548793	-0.242065	970	1.16949	0.722202	0.00217605	0.0123121	1	1.25768	1.21597	1.03483
PG6080	Q9ESW8;A0A1B0GSY1	Pyroglutamyl-peptidase 1	Pgpep1	-0.0722588	-2.44753			971	2.82847	0.968387	0.0021817	0.0123121	1	3.25682	2.40012
PG2511	P39053-6;P39053-5;P39053-4;P39053;A0A0J9YUE9;A0A0J9YUN4;P39053-3	Dynamin-1	Dnm1	-0.185049	0.425694	0.213413	0.557509	972	1.44594	0.790698	0.00218413	0.0123121	1	1.05617	1.50893	1.77271
PG0891	B2RS41;Q8BWF0	Succinate-semialdehyde dehydrogenase, mitochondrial	Aldh5a1	-1.64846	1.11844			973	2.43729	0.942587	0.0021887	0.0123121	1		2.72641	2.14817
PG2029	O35368;O35368-3	Interferon-activable protein 203	Ifi203	0.413041	-0.0519359	-0.475038	-0.0736041	974	1.33945	0.7629	0.0021887	0.0123121	1	1.56937	1.01465	1.43434
PG2943	P83741-4;P83741-5;P83741;P83741-2;P83741-3;Q6SLK2	Serine/threonine-protein kinase WNK1	Wnk1	-0.0417853	0.283557	0.050706	0.372521	975	1.27562	0.746185	0.0021903	0.0123121	1	1.05067	1.25095	1.52524
PG4879	Q8C7V3;Q3TN42	U3 small nucleolar RNA-associated protein 15 homolog	Utp15	0.881196	0.260768	-1.06844	0.269646	976	1.99158	0.894985	0.00219043	0.0123121	1	2.30098	1.23382	2.43994
PG1595	E9QJV4;Q8K2Z2;A0PJ46	Pre-mRNA-processing factor 39	Prpf39	-0.606759	0.0247632	0.757414	0.10289	977	1.57119	0.81686	0.00219072	0.0123121	1	1.18027	2.04666	1.48663
PG5597	Q9CQ75	NADH dehydrogenase [ubiquinone] 1 alpha subcomplex subunit 2	Ndufa2	-0.340851	-1.02784	0.518056	-1.20237	978	2.13735	0.913699	0.00219597	0.0123121	1	2.5183	2.5988	1.29495
PG3738	Q3ULB1;Q921W7;Q99L61		Tes	-0.356947	0.222485	0.438318	0.323684	979	1.38385	0.774346	0.00219836	0.0123121	1	1.01712	1.62248	1.51196
PG5446	Q99J27	Acetyl-coenzyme A transporter 1	Slc33a1	-0.587072	0.136333	0.724646	0.237345	980	1.57446	0.817951	0.00220069	0.0123121	1	1.12875	2.01318	1.58146
PG3969	Q545N8;Q9Z2M7;Q9DCE3;Q9D1M5;Q9CZE9	Phosphomannomutase;Phosphomannomutase 2	Pmm2	-0.169501	-0.0768157	0.234432	-0.0565543	981	1.17117	0.722384	0.00220185	0.0123121	1	1.08703	1.31646	1.11003
PG1542	F6T5L3;E9Q717;Q810M8;Q546X9;Q9CVD2;F6TRN1;Q5M8S1	Ataxin-3	Atxn3	0.356253	-0.658514	-0.357902	-0.808692	982	1.66761	0.835211	0.00220247	0.0123121	1	2.2238	1.50252	1.27652
PG5178	Q8R5L1;O35658	Complement component 1 Q subcomponent-binding protein, mitochondrial	C1qbp	1.21388	-1.13407	-1.36173	-1.45838	983	3.06519	0.980378	0.00220379	0.0123121	1	4.3863	2.30456	2.50471
PG4756	Q8BUR3-2;Q8BUR3;E0CYS8;Q3TAY5;Q3UZU3	Forkhead box protein J3	Foxj3	-1.53124	1.09648			984	2.3186	0.933685	0.00220509	0.0123121	1		2.55778	2.07942
PG0838	B1B0C7;E9PZ16;Q05793;Q3UHH3	Basement membrane-specific heparan sulfate proteoglycan core protein;Endorepellin;LG3 peptide	Hspg2	0.405926	0.519349	-0.511762	0.623643	985	-1.66238	0.0586846	0.00220525	0.0123121	1	-1.77395	-2.08918	-1.124
PG5421	Q922M3;F8WGQ9	BTB/POZ domain-containing adapter for CUL3-mediated RhoA degradation protein 3	Kctd10	-0.219028	-1.94556			986	2.29339	0.931141	0.00220773	0.0123121	1	2.52074	2.06604
PG4852	Q8C4C9;Q9QYI4;D6RHR9	DnaJ homolog subfamily B member 12	Dnajb12	0.222346	0.971019	-0.324671	1.18938	987	2.14577	0.914789	0.00220847	0.0123121	1	1.66379	1.7805	2.99304
PG0124	Q3TCL6;A0A0G2JE26;Q6DFX2	Anthrax toxin receptor 2	Antxr2	1.63133	0.485401			988	2.0991	0.908612	0.0022105	0.0123121	1	1.99944		2.19876
PG2469	Q3U6U7;P32921-2;Q3UDG2;Q4FJZ4;P32921	Tryptophan--tRNA ligase, cytoplasmic;T1-TrpRS;T2-TrpRS	Wars	-0.0195166	-0.197949	0.0618961	-0.216474	989	1.1567	0.720022	0.00221234	0.0123121	1	1.22875	1.205	1.03634
PG3968	Q545I6;Q9ES94;Q9WUU7	Cathepsin Z	Ctsz	-0.339704	-0.348606	0.462725	-0.37415	990	1.38196	0.773074	0.00221755	0.0123215	1	1.36232	1.71447	1.06911
PG4163	Q62086	Serum paraoxonase/arylesterase 2	Pon2	0.285118	0.53886	-0.36659	0.657263	991	1.60305	0.823765	0.0022185	0.0123215	1	1.41178	1.26908	2.12829
PG3002	P97807-2;P97807	Fumarate hydratase, mitochondrial	Fh	-0.339289	-0.104696	0.442853	-0.0767418	992	-1.28067	0.0946584	0.00224052	0.0124241	1	-1.44417	-0.994482	-1.40337
PG3690	Q3UPU3;Q3UHE0;Q6WKZ8-2;Q6WKZ8;Q6WKZ8-3	E3 ubiquitin-protein ligase UBR2	Ubr2	-0.244872	-0.216722	0.33708	-0.221035	993	1.2409	0.738372	0.00224176	0.0124241	1	1.19687	1.47278	1.05306
PG5977	Q9DBR7;Q9DBR7-2	Protein phosphatase 1 regulatory subunit 12A	Ppp1r12a	0.191626	0.0732042	-0.216067	0.0970135	994	1.18928	0.728198	0.00224374	0.0124241	1	1.22032	1.01778	1.32974
PG1761	F8WJ93;Q3UMY5;Q3UMY5-3;A7ISP9;A0A0R4J0H0;A0A0R4J1G7;Q3UMY5-4;Q3UMY5-2	Echinoderm microtubule-associated protein-like 4	Eml4	0.0199432	-0.268919	0.0196079	-0.306232	995	-1.18469	0.105923	0.00224998	0.0124393	1	-1.04844	-1.15453	-1.35109
PG4911	Q8CCP0;Q8CCP0-2;Q8CCP0-3	Nuclear export mediator factor Nemf	Nemf	-0.801228	-0.391756	1.02667	-0.389225	996	1.90269	0.880269	0.00225101	0.0124393	1	1.64807	2.61204	1.44795
PG0861	E9QAI5;B2RQC6;G3UWN2;B2RQC6-2;Q6P9L1	CAD protein;Glutamine-dependent carbamoyl-phosphate synthase;Aspartate carbamoyltransferase;Dihydroorotase	Cad	-0.266235	-0.224258	0.363624	-0.228487	997	1.2556	0.741097	0.00225787	0.0124645	1	1.20396	1.50597	1.05687
PG5039	Q8K232;Q9QYC0;E9Q1K3;F8WHZ9;F8WGR0;Q9QYC0-2	Alpha-adducin	Add1	0.374825	-0.316557	-0.407611	-0.393194	998	1.37357	0.770712	0.00226073	0.0124645	1	1.73823	1.12918	1.25329
PG1034	B9EKJ4;Q3TUF7-2;Q3TUF7-3;Q3TUF7	YEATS domain-containing protein 2	Yeats2	-1.59445	-0.497428			999	-2.04449	0.0361555	0.00226236	0.0124645	1	-2.00284		-2.08613
PG4132	Q61292	Laminin subunit beta-2	Lamb2	1.04329	-1.62585			1000	-2.27301	0.0265262	0.00226468	0.0124648	1		-2.04698	-2.49905
PG3523	Q3U3J3;Q8BKF1;E0CY15;Q3V3C0;E9PWD9;F6TLB0;Q9D196	DNA-directed RNA polymerase;DNA-directed RNA polymerase, mitochondrial	Polrmt	-0.708753	-1.68084			1001	2.15629	0.915879	0.00226797	0.0124705	1	1.99659	2.31599
PG1627	H3BKD4;Q3UJA5;H3BKE6;E9QMI7;E9QMJ1;H3BL41;H3BJY2;E9QN63;Q9QWY8-2;Q9QWY8-4;Q9QWY8-3;Q9QWY8	Arf-GAP with SH3 domain, ANK repeat and PH domain-containing protein 1	Asap1	-0.523534	-0.234233	0.676904	-0.21972	1002	-1.48778	0.0712209	0.00227706	0.012489	1	-1.67873	-1.02997	-1.75463
PG1438	E9PYI8;Q9JMA1;Q80UN0;Q3TC32	Ubiquitin carboxyl-terminal hydrolase;Ubiquitin carboxyl-terminal hydrolase 14	Usp14	-0.203939	0.0476285	0.266375	0.0980038	1003	1.19033	0.728379	0.00227814	0.012489	1	1.01324	1.33968	1.21808
PG4455	Q7TQI3;D3YWF6	Ubiquitin thioesterase OTUB1	Otub1	0.0113509	-0.119383	0.0181688	-0.123176	1004	1.12484	0.710211	0.00228092	0.012489	1	1.1679	1.13367	1.07294
PG1568	E9Q8X9;Q80YS6;Q8BV31;Q9CT56	Actin filament-associated protein 1	Afap1	1.83051	0.0895861			1005	2.22588	0.924237	0.00228315	0.012489	1	2.43019		2.02158
PG2369	Q3UHH5;P21279	Guanine nucleotide-binding protein G(q) subunit alpha	Gnaq	0.168783	-0.027759	-0.180307	-0.0242504	1006	1.15435	0.71875	0.00228516	0.012489	1	1.23214	1.02013	1.21078
PG2261	P0CG14	Chromosome transmission fidelity protein 8 homolog isoform 2	Chtf8	-0.0836074	-0.353823	0.152112	-0.401345	1007	1.24432	0.739644	0.0022883	0.012489	1	1.37229	1.37321	0.987472
PG1205	D3YXZ3;Q91YS4;O88448	Kinesin light chain 2	Klc2	0.145504	0.0460917	-0.157899	0.0677025	1008	1.15594	0.71984	0.0022907	0.012489	1	1.17697	1.0264	1.26446
PG2204	Q3UCT9;Q3TVJ0;O89051;Q9D1Q3;Q9JME4	Integral membrane protein 2B;BRI2, membrane form;BRI2 intracellular domain;BRI2C, soluble form;Bri23 peptide	Itm2b	1.00227	-0.710426	-1.13836	-0.924551	1009	2.36233	0.9375	0.00229151	0.012489	1	3.31377	1.69091	2.08232
PG1208	F6T9K1;Q4FJW2;D3YY09;Q9D6N5;D3YYC2;G3UXH5	Dr1-associated corepressor	Drap1	0.0423545	0.462116	-0.0656605	0.583425	1010	1.42874	0.786337	0.0022925	0.012489	1	1.1458	1.30319	1.83724
PG5886	Q9D6U8	Protein FAM162A	Fam162a	-0.631803	0.711858	0.733269	0.942822	1011	2.05751	0.903888	0.00229545	0.012489	1	1.24657	2.42347	2.50247
PG1816	G3X8U8;O88622-2;O88622;I6RAM3;E9Q088;A5YBK2	Poly(ADP-ribose) glycohydrolase	Parg	0.134018	-0.123371	-0.130494	-0.138019	1012	1.1456	0.715298	0.00229634	0.012489	1	1.26025	1.05718	1.11938
PG3225	Q3TDY8;A2AES3;A2AES5;A2AES4;Q3U2S4-2;Q3U2S4	OTU domain-containing protein 5	Otud5	-0.36584	-1.69765			1013	2.05529	0.903525	0.00229858	0.012489	1	2.13271	1.97786
PG5689	Q9CWD8;Q3URR8;F7D3P0	Iron-sulfur protein NUBPL	Nubpl	1.62497	0.276858			1014	2.03251	0.900436	0.00230707	0.0125228	1	2.07465		1.99037
PG4066	Q5SWU9;Q5SWU9-2	Acetyl-CoA carboxylase 1;Biotin carboxylase	Acaca	0.137819	-0.143624	-0.133501	-0.163026	1015	1.14959	0.716388	0.00230978	0.0125252	1	1.27835	1.06195	1.10847
PG1226	D3YZC7;D3YZC8;Q8R3B7-2;Q8R3B7	Bromodomain-containing protein 8	Brd8	-0.565761	-1.631			1016	2.04772	0.903161	0.00231267	0.0125285	1	1.97547	2.11998
PG6236	Q9WUP7;A0A087WP81;A0A087WRL3	Ubiquitin carboxyl-terminal hydrolase isozyme L5	Uchl5	0.0606951	-0.410054	-0.018678	-0.481657	1017	-1.27804	0.0952035	0.00231864	0.0125485	1	-1.03543	-1.25385	-1.54486
PG2338	P17439;A0A0G2JDK2	Glucosylceramidase	Gba	-0.242873	-0.111504	0.326297	-0.0928874	1018	-1.1991	0.104288	0.00232761	0.0125846	1	-1.30416	-0.988657	-1.30449
PG0957	B2RXP7;B7ZWG0;E9QMB7;Q8CES0	N-alpha-acetyltransferase 30	Naa30	-0.00654253	0.0159001	0.0291578	0.0432535	1019	1.11732	0.707485	0.00234372	0.0126356	1	1.07037	1.11494	1.16664
PG2741	P60824;D3YU80;K4DI65	Cold-inducible RNA-binding protein	Cirbp	-1.01648	1.45529			1020	2.20078	0.922057	0.00234515	0.0126356	1		2.00034	2.40121
PG1603	E9QKG3;Q9CWH5	tRNA (guanine(10)-N2)-methyltransferase homolog	Trmt11	0.284308	0.41596	-0.355847	0.507457	1021	1.45365	0.791969	0.00234712	0.0126356	1	1.33452	1.14349	1.88293
PG3445	Q3TXM9;Q9D0B0	Serine/arginine-rich splicing factor 9	Srsf9	0.401519	-0.124952	-0.455246	-0.161708	1022	-1.31187	0.0915698	0.00234791	0.0126356	1	-1.04533	-1.61371	-1.27659
PG2365	Q3TBB7;P20934	Protein EVI2A	Evi2a	0.373545	0.916539	-0.503975	1.11064	1023	2.10041	0.908975	0.00234851	0.0126356	1	1.73593	1.6246	2.94068
PG1941	K3W4Q9;Q8BH60-2;Q8BH60	Golgi-associated PDZ and coiled-coil motif-containing protein	Gopc	0.337028	-0.360941	-0.358183	-0.444245	1024	1.35836	0.766715	0.00235364	0.0126508	1	1.72792	1.15253	1.19463
PG5508	Q99LD9;Q8BK57;D3Z487;D3Z7J6	Translation initiation factor eIF-2B subunit beta	Eif2b2	0.249849	-0.173726	-0.267171	-0.208848	1025	1.20573	0.731105	0.00235788	0.0126613	1	1.4155	1.03426	1.16744
PG1964	Q3UN47;O08600	Endonuclease G, mitochondrial	Endog	-0.117971	-0.67137	0.219062	-0.785791	1026	1.55248	0.813772	0.00236313	0.0126771	1	1.84864	1.76868	1.04013
PG1156	E9QP59;D3YU56;Q9WU40;Q9WU40-2	Inner nuclear membrane protein Man1	Lemd3	-0.211637	-0.379697	0.309658	-0.422483	1027	1.29675	0.751635	0.00238889	0.0128028	1	1.36775	1.5328	0.989711
PG0641	A2AR60;E9PZJ6;Q6P2L7-3;Q6P2L7-2;Q6P2L7	Protein CASC4	Casc4	1.73597	-1.20569			1028	-2.48709	0.0188953	0.00239136	0.0128035	1		-2.82229	-2.15189
PG3342	Q3TM08;Q8BPG6;Q0VDW5	Sulfatase-modifying factor 2	Sumf2	0.247237	0.364808	-0.306763	0.448093	1029	-1.37825	0.0833939	0.00240153	0.0128455	1	-1.48808	-1.64914	-0.997518
PG4533	Q80YA7;A0A1L1STG9	Dipeptidyl peptidase 8	Dpp8	0.252365	-0.0871112	-0.277104	-0.103428	1030	1.18342	0.726199	0.00241432	0.012887	1	1.34344	0.993617	1.21321
PG2353	P19182;F6TBT6	Interferon-related developmental regulator 1	Ifrd1	0.0630567	-0.436996	-0.0194067	-0.514704	1031	1.28819	0.749818	0.00241686	0.012887	1	1.54805	1.31558	1.00093
PG4577	Q8BGB5	LIM domain-containing protein 2	Limd2	0.673188	1.52991			1032	-2.08277	0.034157	0.00241915	0.012887	1	-1.94621	-2.21933
PG5787	Q9D020-1;Q9D020	Cytosolic 5-nucleotidase 3A	Nt5c3a	-1.01122	1.34887			1033	2.10202	0.909702	0.00242205	0.012887	1		1.95036	2.25369
PG6045	Q9EQG9-2;Q9EQG9;Q8BSX8;Q9EQG9-3	Collagen type IV alpha-3-binding protein	Col4a3bp	-0.530102	0.2853	0.643626	0.414372	1034	1.54909	0.811955	0.00242298	0.012887	1	1.04754	1.91422	1.68553
PG0326	A0A0R4J233;Q8C650-2;Q8C650	Septin-10	2010-09-01	-0.003513	0.509984	-0.0137557	0.64553	1035	1.4602	0.793241	0.00242335	0.012887	1	1.12309	1.36227	1.89523
PG2926	P70697	Uroporphyrinogen decarboxylase	Urod	-0.38615	-0.00582621	0.491915	0.0476401	1036	1.29431	0.750908	0.00243167	0.0129119	1	1.04597	1.59931	1.23766
PG2386	Q5HZI6;P23591	GDP-L-fucose synthase	Tsta3	0.0633032	0.117968	-0.0637745	0.16204	1037	1.14215	0.714571	0.00243391	0.0129119	1	1.07433	1.06473	1.28739
PG0827	B1AXZ0;Q91XI8;Q80UJ0;Q91XI9;Q3UR02;Q564D8;Q80Y51;B1AXZ6;B1AXZ4;B1AXZ5;Q60899;A2A9S3;A2A9S2;A2A9R8;Q9CXQ0;A2A9R6;Q8BVA9;A2A9S0;Q80XH9;Q61701-2;Q61701	ELAV-like protein;ELAV-like protein 2;ELAV-like protein 4	Elavl2;Elavl4	-1.00297	1.49754			1038	2.22678	0.924419	0.00243506	0.0129119	1		1.99892	2.45464
PG2428	Q544Z7;P28352;F6QA74;D3Z124	DNA-(apurinic or apyrimidinic site) lyase;DNA-(apurinic or apyrimidinic site) lyase, mitochondrial	Apex1	0.108416	-0.117155	-0.0998928	-0.128355	1039	1.11958	0.708394	0.00244047	0.0129281	1	1.21611	1.05045	1.09219
PG5766	Q9CZC8	Secernin-1	Scrn1	-1.76074	-0.899374			1040	-2.35742	0.0228924	0.00244453	0.0129372	1	-2.06787		-2.64697
PG0536	A2A9I0;O35166	Golgi SNAP receptor complex member 2	Gosr2	-0.147491	0.246361	0.182039	0.335761	1041	-1.23865	0.0997456	0.00245008	0.0129541	1	-1.50128	-1.17186	-1.04281
PG6033	Q9EPK7;E9PUW7;Q9EPK7-2	Exportin-7	Xpo7	-0.244814	-0.0238853	0.321697	0.0141197	1042	1.18047	0.725109	0.00245987	0.012974	1	1.02255	1.37595	1.1429
PG4521	Q80XK6	Autophagy-related protein 2 homolog B	Atg2b	-0.395198	0.0358506	0.499594	0.0991999	1043	1.3049	0.753815	0.00246009	0.012974	1	1.02683	1.60927	1.27861
PG3330	Q3UWH3;Q3TL56;Q80X41-2;Q80X41-5;Q80X41-3;Q80X41	Serine/threonine-protein kinase VRK1	Vrk1	0.453929	-0.542238	-0.485762	-0.674841	1044	1.57885	0.818859	0.00246091	0.012974	1	2.12147	1.3138	1.30127
PG3568	Q3UCC6;Q3U6C7;Q9Z2I9	Succinyl-CoA ligase subunit beta;Succinyl-CoA ligase [ADP-forming] subunit beta, mitochondrial	Sucla2	-0.166305	0.0512446	0.220382	0.099352	1045	1.14962	0.71657	0.00246717	0.0129946	1	0.991631	1.26822	1.18901
PG0525	F6VYE2;A2A791-2;A2A791	Zinc finger MYM-type protein 4	Zmym4	-1.62692	-0.299103			1046	-2.02732	0.0374273	0.00247689	0.0130148	1	-2.12687		-1.92777
PG2266	Q9DD05;P10518;O89061	Delta-aminolevulinic acid dehydratase	Alad	0.0685881	0.101343	-0.0688729	0.141337	1047	1.13093	0.711664	0.00247939	0.0130148	1	1.07591	1.05243	1.26446
PG0497	A1L361;Q9WUN2;Q3THP3	Serine/threonine-protein kinase TBK1	Tbk1	-0.362574	0.0357822	0.459978	0.0964626	1048	1.27364	0.746003	0.00247979	0.0130148	1	1.01402	1.55195	1.25494
PG1989	Q3TPX5;O08989	Ras-related protein M-Ras	Mras	-0.56514	-1.59789			1049	2.00881	0.897347	0.00248047	0.0130148	1	1.93031	2.0873
PG5484	Q99KK1	Receptor expression-enhancing protein 3	Reep3	-1.29338	1.044			1050	2.07074	0.90516	0.00249087	0.0130514	1		2.2124	1.92908
PG2146	O70572;Q8C6H6	Sphingomyelin phosphodiesterase 2	Smpd2	-0.110379	-0.00299596	0.156767	0.0286574	1051	1.11539	0.706759	0.0024922	0.0130514	1	1.021	1.19953	1.12563
PG5449	Q99J83	Autophagy protein 5	Atg5	0.034475	0.509958	-0.0598899	0.642409	1052	1.45007	0.791061	0.00249688	0.0130635	1	1.13442	1.3218	1.894
PG2242	Q05DU8;Q6NZB3;P07742	Ribonucleoside-diphosphate reductase;Ribonucleoside-diphosphate reductase large subunit	Rrm1	-0.0835225	-0.727654	0.181694	-0.857231	1053	-1.59096	0.0632267	0.00250067	0.0130709	1	-1.24211	-1.39167	-2.13908
PG3814	Q3UVL4;Q3UVL4-2	Vacuolar protein sorting-associated protein 51 homolog	Vps51	-0.0738596	-0.246009	0.131712	-0.270661	1054	1.1476	0.715661	0.00252381	0.0131691	1	1.21737	1.24837	0.977044
PG6044	R4H4Y7;Q9EQC5;R4H4V1	N-terminal kinase-like protein	Scyl1	0.0210966	-0.476771	0.0347122	-0.559796	1055	1.30662	0.754724	0.00252446	0.0131691	1	1.56631	1.37503	0.978531
PG5221	Q8VDK1-2;Q8VDK1	Nitrilase homolog 1	Nit1	1.24728	-1.15054			1056	-2.02453	0.037609	0.00252663	0.0131691	1		-2.13389	-1.91518
PG6032	Q9EPK5;Q9EPK5-2	WW domain-containing transcription regulator protein 1	Wwtr1	0.174745	0.062794	-0.194738	0.0856918	1057	1.1423	0.714753	0.00254288	0.0132413	1	1.16996	0.986251	1.27069
PG3476	Q3UDS1;Q3U057;Q9QXK7;Q3TC91;Q497G2;Q9CWL0	Cleavage and polyadenylation specificity factor subunit 3	Cpsf3	0.1273	-0.432412	-0.0977935	-0.51434	1058	1.28005	0.74782	0.00255111	0.0132716	1	1.57347	1.25525	1.01143
PG1596	Q9QXJ2;E9QJX9;Q3UDU1;Q3U5W1;Q9QZE4;Q8CD97;Q9WVL2;Q6P1X8	Signal transducer and activator of transcription;Signal transducer and activator of transcription 2	Stat2	0.695158	0.2583	-0.842302	0.28177	1059	1.68097	0.837573	0.00255978	0.0133041	1	1.88684	1.0723	2.08378
PG4975	Q8CIH9;Q3TKC5;Q3UGU3;Q3UGA8;Q3TUW2	Amidophosphoribosyltransferase	Ppat	0.325949	-0.0977414	-0.365627	-0.122378	1060	1.217	0.734375	0.00256718	0.0133238	1	1.42483	0.970414	1.25576
PG3822	Q3UXD8;Q8BSK8-2;Q8BSK8;Q9CST0	Ribosomal protein S6 kinase;Ribosomal protein S6 kinase beta-1	Rps6kb1	-0.157046	-0.163788	0.226212	-0.163628	1061	-1.13691	0.111919	0.00256841	0.0133238	1	-1.16265	-0.985174	-1.2629
PG2071	Q3TCY0;Q0PD21;Q3TQ93;O35963	Ras-related protein Rab-33B	Rab33b	1.00772	-1.39696			1062	-2.04009	0.0365189	0.0025739	0.0133319	1		-1.90643	-2.17375
PG2302	P13595;E9Q589;A0A0A6YY47;P13595-3;P13595-2;E9QB01;A0A0A6YY91;A0A0A6YWU2;P13595-4	Neural cell adhesion molecule 1	Ncam1	0.874994	-0.274959	-1.01837	-0.383155	1063	1.86949	0.873183	0.00257595	0.0133319	1	2.49185	1.21766	1.89895
PG0926	B2RUM8;Q8K363	ATP-dependent RNA helicase DDX18	Ddx18	0.00581311	-0.349527	0.0431697	-0.403381	1064	-1.19539	0.104651	0.00257725	0.0133319	1	-1.0195	-1.13876	-1.42792
PG5627	Q9CQQ0	Small integral membrane protein 8	Smim8	1.2539	-1.13766			1065	-2.01873	0.0381541	0.00259259	0.0133987	1		-2.13774	-1.89972
PG2487	Q0PD38;P35293	Ras-related protein Rab-18	Rab18	0.161972	0.184588	-0.188898	0.235256	1066	1.18267	0.726017	0.00259923	0.0134139	1	1.13118	1.01387	1.40297
PG5309	Q91VW3	SH3 domain-binding glutamic acid-rich-like protein 3	Sh3bgrl3	-0.00859013	0.272924	0.0112349	0.356854	1067	1.21163	0.732922	0.00260268	0.0134139	1	1.01169	1.16244	1.46075
PG6046	Q9EQH2;Q8C9W5;Q8C4S7	Endoplasmic reticulum aminopeptidase 1	Erap1	0.720299	0.263963	-0.873286	0.286631	1068	-1.70666	0.0555959	0.00260412	0.0134139	1	-1.48995	-2.33649	-1.29355
PG5648	Q9CQY2;Q3TQP0	RNMT-activating mini protein	Fam103a1;Gm10767	0.239925	0.137436	-0.279827	0.171414	1069	1.19492	0.729469	0.00260528	0.0134139	1	1.21527	0.972727	1.39676
PG3747	Q3UM23;Q91VI7;A0A1B0GSG5	Ribonuclease inhibitor	Rnh1	0.0634934	0.177367	-0.0687223	0.234461	1070	1.15191	0.717842	0.00260802	0.0134155	1	1.0491	1.06314	1.34348
PG1608	E9QL65;Q8CI04;Q3USH9	Conserved oligomeric Golgi complex subunit 3	Cog3	0.711431	0.0932209	-0.848958	0.079137	1071	1.62718	0.826853	0.00262049	0.0134663	1	1.93975	1.03663	1.90517
PG5188	Q9WTS9;Q8VC70;E9Q7G6;Q3UGN4	RNA-binding motif, single-stranded-interacting protein 2	Rbms2	0.0333635	0.84907	-0.0854682	1.05604	1072	1.85468	0.869186	0.00262279	0.0134663	1	1.33808	1.66337	2.56259
PG0275	A0A0R4J0U7;Q8R395	COMM domain-containing protein 5	Commd5	0.0341637	-2.64257			1073	3.019	0.978561	0.00263118	0.0134967	1	3.55911	2.47888
PG4984	Q8CJ53-2;Q8CJ53;Q8CJ53-4;Q8CJ53-3	Cdc42-interacting protein 4	Trip10	0.108002	-0.220461	-0.0911872	-0.254301	1074	1.12883	0.711119	0.00263464	0.0135019	1	1.28615	1.0795	1.02085
PG4520	Q80XH7;Q9WVF7;Q3UPI9	DNA polymerase;DNA polymerase epsilon catalytic subunit A	Pole	0.136972	-0.552793	-0.0999814	-0.661928	1075	1.38213	0.773256	0.00265141	0.013563	1	1.75211	1.37229	1.02198
PG2929	Q6P9Q2;P70700	DNA-directed RNA polymerase;DNA-directed RNA polymerase I subunit RPA2	Polr1b	-0.4336	-0.00389307	0.54939	0.0538576	1076	1.3105	0.755632	0.0026515	0.013563	1	1.03424	1.65304	1.24423
PG4544	Q80ZV0	Ribonuclease H2 subunit B	Rnaseh2b	-0.00446201	-0.218867	0.0452733	-0.243208	1077	1.11314	0.706032	0.00265401	0.0135633	1	1.20605	1.15336	0.98002
PG0469	A0JNY3;Q8BUV3	Gephyrin;Molybdopterin adenylyltransferase;Molybdopterin molybdenumtransferase	Gphn	0.817089	-0.894727	-0.898828	-1.13424	1078	2.2364	0.925509	0.00266161	0.0135895	1	3.1922	1.74766	1.76934
PG3419	Q3TVI8	Pre-B-cell leukemia transcription factor-interacting protein 1	Pbxip1	-1.60051	-0.279562			1079	-1.99015	0.0388808	0.00266866	0.0136129	1	-2.09873		-1.88157
PG4236	Q6DFV1	Condensin-2 complex subunit G2	Ncapg2	-0.143316	0.132656	0.185997	0.196761	1080	1.14424	0.715116	0.00269103	0.0137118	1	0.951137	1.22913	1.25246
PG1720	Q571B1;F8VPZ9		Gltscr1	0.0941392	-0.159551	-0.0791875	-0.178896	1081	-1.0982	0.117006	0.00269418	0.0137118	1	-0.98468	-1.14794	-1.16197
PG5519	Q99LR1;D6RFU2;Q99LR1-2	Monoacylglycerol lipase ABHD12	Abhd12	-0.488955	-0.0386293	0.619376	0.0160007	1082	-1.35777	0.0864826	0.00269553	0.0137118	1	-1.64475	-0.964459	-1.46409
PG4106	Q60866;A2AUR3;Q60866-2;A2AUR5	Phosphotriesterase-related protein	Pter	-0.464104	0.479516	0.548049	0.645845	1083	1.59694	0.823038	0.00270323	0.0137383	1	1.0179	1.87272	1.90019
PG1610	E9QLA5;Q0GNC1;Q0GNC1-3	Inverted formin-2	Inf2	-0.108976	0.372396	0.125255	0.486325	1084	1.29623	0.751453	0.00271096	0.0137649	1	0.980883	1.30849	1.59931
PG0997	B7ZP47;Q65Z40	Wings apart-like protein homolog	Wapal	-0.547089	0.425686	0.65311	0.586951	1085	1.62285	0.826308	0.00271569	0.0137762	1	1.02878	1.97509	1.8647
PG1144	D2KHZ9;P16858;A0A0A0MQF6;S4R257;Q3TUZ9	Glyceraldehyde-3-phosphate dehydrogenase	GAPDH;Gapdh;Gm10481	0.152521	-0.0411695	-0.159493	-0.0392813	1086	1.09837	0.70258	0.00272117	0.0137784	1	1.17491	0.979675	1.14054
PG3557	Q3U5C0;Q3UDU6;Q8BYH7;I6L974	TBC1 domain family member 17	Tbc1d17	-0.0525414	-0.235935	0.105021	-0.260112	1087	1.11768	0.707849	0.00272317	0.0137784	1	1.19354	1.19953	0.959982
PG1804	G3UZJ3;Q8K0N0;Q8C8Z9;O70585;G3UYK9	Dystrobrevin;Dystrobrevin beta	Dtnb	0.618604	-0.287771	-0.705967	-0.377922	1088	1.53289	0.806504	0.00272575	0.0137784	1	2.01813	1.08831	1.49222
PG5943	Q9DAU1;Q9DAU1-2	Protein canopy homolog 3	Cnpy3	-1.05899	-1.21269	1.40491	-1.36936	1089	2.83409	0.968932	0.00272614	0.0137784	1	2.91895	3.90412	1.6792
PG4172	Q62219;Q62219-4;Q62219-2;Q62219-3;E9Q1D5;Q62219-7;Q62219-10;Q62219-9;Q62219-5	Transforming growth factor beta-1-induced transcript 1 protein	Tgfb1i1	-0.59816	0.028267	0.746693	0.106463	1090	1.47835	0.796512	0.00272929	0.0137817	1	1.09021	1.94629	1.39853
PG5336	Q91WR3-2;Q91WR3;Q91WR3-3;Q3UG63	Activating signal cointegrator 1 complex subunit 2	Ascc2	0.0240232	-0.0398558	-0.00353676	-0.027226	1091	1.06951	0.694222	0.00273826	0.0138143	1	1.07274	1.05322	1.08255
PG3998	Q5DTL0;Q9EQG7;Q5FWJ8	Ectonucleotide pyrophosphatase/phosphodiesterase family member 5	Enpp5	1.834	0.923882			1092	2.46595	0.944586	0.00274237	0.0138208	1	2.09936		2.83254
PG0694	A2RSF1;Q8K4M5;G8JL54;Q3UGT3;Q8VI86	COMM domain-containing protein 1	Commd1	1.55144	0.53612			1093	2.01771	0.898619	0.00274458	0.0138208	1	1.87014		2.16528
PG1452	Q3UKQ7;E9Q8M6;E9PZJ2;Q61179;Q924T6	Interferon regulatory factor 9	Irf9;Isgf3g	1.52569	0.285846			1094	1.91608	0.883176	0.00276723	0.0139222	1	1.93569		1.89647
PG5641	Q9CQV7;D3Z5K6;G3X8S1;Q9CQV7-3;Q9CQV7-2	Mitochondrial import inner membrane translocase subunit TIM14	Dnajc19	-0.739977	0.461809	0.884502	0.646694	1095	1.84172	0.867006	0.0027871	0.0140093	1	1.11745	2.34124	2.06647
PG0321	A0A0R4J1Z3;Q9CR67;Q9CWD1	Transmembrane protein 33	Tmem33	-0.353731	0.191574	0.436867	0.285727	1096	1.28491	0.748547	0.0027912	0.0140171	1	0.938257	1.5268	1.38969
PG0558	A2AEM2;Q99LI2	Chloride channel CLIC-like protein 1	Clcc1	1.19595	-1.11694			1097	-1.95131	0.0406977	0.00280412	0.0140647	1		-2.05041	-1.85222
PG1629	Q7TMR8;E9QPE2;Q3UYC9;E9QN12;P05622;Q3TZ27;Q003I5	Platelet-derived growth factor receptor beta;Receptor protein-tyrosine kinase	Pdgfrb	-0.318707	0.363449	0.380682	0.492476	1098	1.37349	0.770531	0.00280578	0.0140647	1	0.94507	1.555	1.62041
PG6126	Q9JJY4;Q8R4Z6;Q8R4Z5;Q8BQD9	Probable ATP-dependent RNA helicase DDX20	Ddx20	-0.179016	-0.287886	0.262749	-0.313176	1099	-1.17207	0.107558	0.00281227	0.0140844	1	-1.1369	-0.979388	-1.39992
PG4349	Q99LF8;Q6PHQ9;A3KFU5;Q91YZ8;D3Z5M2;A3KFU8;Q3UX16	Polyadenylate-binding protein	Pabpc4;Gm10110	0.244893	0.132862	-0.285498	0.165431	1100	1.17268	0.723292	0.00281674	0.014094	1	1.19854	0.94738	1.37212
PG2858	P63094;Q6R0H7;Z4YKV1;P63094-3;P63094-2;Q6R0H7-4	Guanine nucleotide-binding protein G(s) subunit alpha isoforms short;Guanine nucleotide-binding protein G(s) subunit alpha isoforms XLas	Gnas	-0.071154	0.27516	0.0870408	0.364671	1101	1.19454	0.729288	0.00283352	0.014165	1	0.957977	1.19491	1.43073
PG3512	Q571D8;Q3U325;Q80XQ2;Q4KMV6;Q3UN43	TBC1 domain family member 5	Tbc1d5	-0.110839	-0.0296609	0.159444	-0.00382233	1102	1.07745	0.696584	0.00284016	0.0141853	1	0.998561	1.16699	1.06681
PG3213	Q3TDA1;Q8BX94	Oxysterol-binding protein;Oxysterol-binding protein-related protein 2	Osbpl2	-1.07303	1.05934			1103	1.89781	0.879542	0.00285574	0.0142502	1		1.91818	1.87743
PG3347	Q921K2;Q3TX36;Q3TM68;Q3TIV3;Q3TF18;Q3U868;Q3UJ03		Parp1	-0.541294	-0.100766	0.687875	-0.0555156	1104	-1.39201	0.0813953	0.00288257	0.0143711	1	-1.67183	-0.945175	-1.55903
PG1884	H3BIZ7;Q8BIE6;Q8BIE6-2;Q3TB04;H3BL79	FERM domain-containing protein 4A	Frmd4a	-0.106242	-0.00387566	0.151812	0.0272481	1105	1.07318	0.695676	0.00289506	0.0144203	1	0.98165	1.15418	1.08371
PG1625	E9QMF5;Q80TN7;F6SRT8	Neuron navigator 3	Nav3	-1.06391	1.05754			1106	1.88849	0.876817	0.00289865	0.0144227	1		1.90502	1.87196
PG4096	Q60715;Q3TN84;Q3UF16	Prolyl 4-hydroxylase subunit alpha-1	P4ha1	-0.166585	0.449531	0.189095	0.585076	1107	1.3636	0.767805	0.00290078	0.0144227	1	0.970173	1.40734	1.71327
PG1463	Q3UT02;E9Q066;G3X9Q6;Q8BWW4	La-related protein 4	Larp4	-0.196208	-0.120394	0.270329	-0.107525	1108	-1.10992	0.115552	0.00291229	0.0144315	1	-1.18339	-0.935073	-1.21129
PG2542	Q3UHW9;P45591	Cofilin-2	Cfl2	0.361795	1.07517	-0.502301	1.30504	1109	2.19616	0.920422	0.00291265	0.0144315	1	1.73135	1.69984	3.15728
PG2514	P39098-2;P39098	Mannosyl-oligosaccharide 1,2-alpha-mannosidase IB	Man1a2	0.139281	0.0370996	-0.149627	0.0572431	1110	-1.08441	0.118823	0.0029158	0.0144315	1	-1.06158	-1.20728	-0.984362
PG3881	Q4FK57;Q4FJZ3;Q8R180	ERO1-like protein alpha	Ero1l	0.0194421	0.217263	-0.0183902	0.286697	1111	1.13979	0.713844	0.00291671	0.0144315	1	0.988556	1.0787	1.35211
PG4369	Q6ZPR5;E9Q0L7;E9Q9L1;E9Q1V5;E9Q914;Q6ZPR5-5;Q6ZPR5-3;Q6ZPR5-2;Q6ZPR5-4	Sphingomyelin phosphodiesterase 4	Smpd4	-0.210817	0.473835	0.240885	0.618312	1112	1.40215	0.779251	0.00292044	0.0144315	1	0.969409	1.47665	1.76039
PG1443	E9PYT0;B9EKC3;P97393	Rho GTPase-activating protein 5	Arhgap5	0.213445	-0.0282706	-0.234508	-0.0285076	1113	1.10611	0.704215	0.00292289	0.0144315	1	1.2094	0.936304	1.17261
PG0821	B1AX95;Q9DBS2	Tumor protein p63-regulated gene 1-like protein	Tprgl;Tprg1l	-0.385954	-0.20233	0.507281	-0.192007	1114	-1.25806	0.0973837	0.00292418	0.0144315	1	-1.39022	-0.916185	-1.46779
PG0754	Q5FWB7;A6ZI44;P05064;Q6NY00;D3YWI1;Q9CPQ9;A6ZI46	Fructose-bisphosphate aldolase;Fructose-bisphosphate aldolase A	Aldoa;Aldoart1	-0.181317	0.230391	0.224388	0.319038	1115	1.18793	0.727834	0.00292528	0.0144315	1	0.915648	1.28476	1.3634
PG6155	Q9QWT9-3;Q9QWT9-2;Q9QWT9;A0A068BFR6	Kinesin-like protein KIFC1;Kinesin-like protein	Kifc1	-0.0572421	-0.49112	0.130994	-0.57092	1116	1.27644	0.74673	0.00292615	0.0144315	1	1.50038	1.41014	0.918786
PG1679	F6VII1;Q9WUB0	RanBP-type and C3HC4-type zinc finger-containing protein 1	Rbck1	1.02195	-2.06339			1117	-2.64264	0.0145349	0.00293168	0.0144458	1		-2.19387	-3.09141
PG5606	Q9CQB5;D3Z3X4	CDGSH iron-sulfur domain-containing protein 2	Cisd2	0.116367	0.461988	-0.155538	0.577248	1118	1.35372	0.765443	0.00293927	0.0144702	1	1.11262	1.16906	1.77947
PG2512	Q3T9X3;P39054;F8WIV5;Q3TCR7;Q3TBU6;G3X9G4;Q9CUM4	Dynamin-2	Dnm2	-0.0168815	-0.148425	0.0547631	-0.156296	1119	1.06191	0.691679	0.00294775	0.014496	1	1.1062	1.09877	0.980764
PG0894	B2RSC8;P46935	E3 ubiquitin-protein ligase NEDD4	Nedd4	-0.082199	-0.0936815	0.129744	-0.0842238	1120	1.06149	0.691315	0.00294976	0.014496	1	1.03658	1.14021	1.00768
PG1211	D3YYD2;Q3UQF7;Q9D2L9	Protein FAM111A	Fam111a	0.557408	-0.0946599	-0.646979	-0.137449	1121	1.38559	0.774709	0.00296307	0.0145484	1	1.72222	0.953506	1.48105
PG1948	Q6W4W7;K4PWM5;O70566;Q8C414;E9Q4U7;Q3U4Y4	Protein diaphanous homolog 2	Diap2;Diaph2	0.162591	-0.0920955	-0.167679	-0.102204	1122	-1.0805	0.119004	0.00296802	0.0145597	1	-0.968198	-1.19764	-1.07565
PG2606	P50543	Protein S100-A11	S100a11	-0.723958	0.548453	0.858168	0.751051	1123	1.86301	0.871548	0.00297898	0.0145972	1	1.0966	2.3334	2.15903
PG4986	Q8CJF7	Protein ELYS	Ahctf1	-0.361357	-0.235491	0.480041	-0.234447	1124	-1.24356	0.0988372	0.00298179	0.0145972	1	-1.34224	-0.915082	-1.47335
PG5143	Q8R3B1;G5DDB7;Q05DG3	1-phosphatidylinositol 4,5-bisphosphate phosphodiesterase delta-1;Phosphoinositide phospholipase C	Plcd1	-0.360518	-0.277421	0.482352	-0.285649	1125	-1.26075	0.0968387	0.00298362	0.0145972	1	-1.3342	-0.925043	-1.52302
PG3797	Q3USJ8-3;Q3USJ8;Q3USJ8-2	F-BAR and double SH3 domains protein 2	Fchsd2	1.02614	-1.19026			1126	-1.87253	0.0474201	0.0029871	0.0146012	1		-1.8484	-1.89666
PG6242	Q9WV92-3;Q9WV92;Q9WV92-2;Q9WV92-6;Q9WV92-4;Q9WV92-5	Band 4.1-like protein 3;Band 4.1-like protein 3, N-terminally processed	Epb41l3	0.13561	-0.315153	-0.117197	-0.372022	1127	-1.14822	0.10992	0.00300098	0.0146561	1	-0.919385	-1.20176	-1.32352
PG5813	Q9D0R8;A0A0A0MQC9	Protein LSM12 homolog	Lsm12	-0.527922	-0.185125	0.678335	-0.159477	1128	1.37804	0.771802	0.00300698	0.0146723	1	1.1556	1.83009	1.14842
PG0783	B1AQJ2;B0QZF8	Ubiquitin carboxyl-terminal hydrolase 36	Usp36	-0.385492	-0.721848	0.547973	-0.825584	1129	1.63415	0.828488	0.00302026	0.0147241	1	1.80915	2.07359	1.01971
PG4964	Q8CHW4	Translation initiation factor eIF-2B subunit epsilon	Eif2b5	-0.101622	-0.030705	0.148332	-0.00584543	1130	1.05702	0.68968	0.00303526	0.0147841	1	0.98395	1.13939	1.04773
PG1216	D3YYR5;Q9Z256;D3Z5U5;Q9Z257;Q3UCX4;Q3TR36;Q9JJX6-4;Q9JJX6-2;Q9JJX6-3;Q9JJX6	P2X purinoceptor;P2X purinoceptor 4	P2rx4	-1.4743	-0.593967			1131	-1.9278	0.0423328	0.00305999	0.0148573	1	-1.80021		-2.05539
PG5162	Q8R409;Q8VDF7	Protein HEXIM1	Hexim1	0.506535	-0.328573	-0.566619	-0.418562	1132	-1.3934	0.0808503	0.00306183	0.0148573	1	-0.947307	-1.74075	-1.49215
PG1861	G5E8A0;Q8CI95	Oxysterol-binding protein;Oxysterol-binding protein-related protein 11	Osbpl11	-0.256213	0.478982	0.295609	0.628281	1133	1.41102	0.781795	0.00306396	0.0148573	1	0.949619	1.52082	1.76262
PG3776	Q3UQA3;P51175;A0A0A6YX50	Protoporphyrinogen oxidase	Ppox	-0.531904	0.126836	0.658398	0.221275	1134	-1.38858	0.0819404	0.00306429	0.0148573	1	-1.79755	-0.992149	-1.37605
PG5710	Q9CX60	Protein LBH	Lbh	0.0255115	0.811064	-0.072914	1.01033	1135	-1.73431	0.0537791	0.00306449	0.0148573	1	-2.23289	-1.91218	-1.05786
PG2535	P43275	Histone H1.1	Hist1h1a	-0.867347	-0.681192	1.12996	-0.736807	1136	-2.03095	0.0372456	0.00306647	0.0148573	1	-2.15191	-1.21422	-2.72674
PG3521	Q3U3G2;Q91YL2	E3 ubiquitin-protein ligase RNF126	Rnf126	-1.05233	1.0324			1137	1.85641	0.869731	0.00307071	0.0148647	1		1.87911	1.8337
PG4826	Q8C145;D3Z7N4	Zinc transporter ZIP6	Slc39a6	1.52993	0.180427			1138	1.89135	0.877362	0.00307467	0.0148708	1	1.98387		1.79883
PG4121	Q61107	Guanylate-binding protein 4	Gbp4	1.71725	-1.11296			1139	-2.38908	0.021439	0.00308112	0.0148889	1		-2.75948	-2.01869
PG1300	D3Z7B5;Q8BWY9	Protein CIP2A	C330027C09Rik;Kiaa1524	-0.144788	-0.499538	0.237986	-0.574065	1140	1.28602	0.749092	0.00309125	0.0149153	1	1.46553	1.49125	0.901271
PG4652	Q8BJS4-2;Q8BJS4;Q8BJS4-3;Q4QQM3	SUN domain-containing protein 2	Sun2	0.186633	-0.155225	-0.191864	-0.181144	1141	1.09024	0.700945	0.00309201	0.0149153	1	1.2534	0.965794	1.05154
PG3092	Q0KL02;Q0KL02-4;Q0KL02-3;Q0KL02-2	Triple functional domain protein	Trio	-0.143248	0.292979	0.173184	0.392266	1142	1.19892	0.729651	0.00310222	0.0149515	1	0.911144	1.25353	1.43208
PG1723	F8VQ28;Q8VI36;Q8VI36-2;Q3UG90;Q99LE7;A0A0J9YV30;A0A1D5RMM8	Paxillin	Pxn	-0.534019	0.878758	0.601258	1.1384	1143	2.01649	0.898074	0.003105	0.0149518	1	1.16215	2.27288	2.61444
PG2777	Q3U8H8;P61971	Nuclear transport factor 2	Nutf2	-0.123533	0.959961	0.0962767	1.20403	1144	1.93434	0.88681	0.00311794	0.015001	1	1.26369	1.84747	2.69185
PG1187	D3YWD5;Q9D2V8;D6RI23;A0A0J9YVE9;D3YYM9	Major facilitator superfamily domain-containing protein 10	Mfsd10	-0.25408	-0.42258	0.36461	-0.471324	1145	1.26481	0.743096	0.00312891	0.0150406	1	1.33719	1.54285	0.9144
PG2504	P36916;A2VDH5;Q52KE3;P36916-2	Guanine nucleotide-binding protein-like 1	Gnl1	-0.0559592	-0.0964803	0.098098	-0.0897715	1146	-1.03999	0.12282	0.00314413	0.0151006	1	-1.04844	-0.981699	-1.08982
PG3374	Q3TQD9;Q3TWI2;Q99LB7	Sarcosine dehydrogenase, mitochondrial	Sardh	-0.682456	-0.52987	0.89339	-0.567314	1147	-1.69957	0.0559593	0.00314795	0.0151058	1	-1.80557	-1.05907	-2.23407
PG3366	Q3TPE9;Q3TPE9-2	Ankyrin repeat and MYND domain-containing protein 2	Ankmy2	1.4985	0.458547	-1.83386	0.460615	1148	2.7437	0.963299	0.00315592	0.0151308	1	3.28464	1.45547	3.49097
PG5429	Q922Y1	UBX domain-containing protein 1	Ubxn1	0.209231	-0.12198	-0.221949	-0.142441	1149	1.08775	0.700036	0.00316138	0.0151438	1	1.24402	0.938974	1.08024
PG4394	Q6ZWQ9;Q9CXD2;Q9D6E6;Q922W7;D3YV37		Myl12a	0.0742326	0.21698	-0.0849106	0.281894	1150	1.12025	0.708576	0.00318097	0.0152125	1	1.0001	1.01543	1.3452
PG3838	Q3UYV4;Q9JL60	Glucocorticoid modulatory element-binding protein 1	Gmeb1	-1.0365	2.19614			1151	2.87418	0.972202	0.0031813	0.0152125	1		2.32563	3.42274
PG3551	Q3U4W8;P56399	Ubiquitin carboxyl-terminal hydrolase;Ubiquitin carboxyl-terminal hydrolase 5	Usp5	-0.23768	-0.105291	0.319497	-0.0857328	1152	1.10513	0.703852	0.00318402	0.0152125	1	0.999332	1.31026	1.0058
PG5781	Q9CZU6;Q0QEL9	Citrate synthase, mitochondrial;Citrate synthase	Cs	-0.1118	-0.578559	0.204198	-0.673112	1153	1.34204	0.763445	0.00318861	0.0152212	1	1.58685	1.53581	0.903456
PG3661	Q3UFS0;Q3UFS0-3	Protein zyg-11 homolog B	Zyg11b	1.7456	-0.00409907			1154	2.09763	0.908249	0.00320187	0.0152713	1	2.35211		1.84316
PG5054	Q8K2I1;D3YWJ4	Protein farnesyltransferase subunit beta	Fntb	-0.393551	-0.717136	0.557386	-0.819183	1155	1.60909	0.82431	0.00321336	0.0153128	1	1.77676	2.05408	0.996437
PG4201	Q64521;A2AQR0	Glycerol-3-phosphate dehydrogenase, mitochondrial;Glycerol-3-phosphate dehydrogenase	Gpd2	-0.233953	0.189657	0.29155	0.273645	1156	1.16105	0.721294	0.00322512	0.0153312	1	0.883124	1.30761	1.29243
PG5378	Q91Z31;Q91Z31-2	Polypyrimidine tract-binding protein 2	Ptbp2	1.65827	-1.08445			1157	-2.31389	0.0245276	0.00322553	0.0153312	1		-2.66761	-1.96018
PG4407	Q78HU3	Multivesicular body subunit 12A	Mvb12a	-1.08112	-1.78726			1158	2.4117	0.940952	0.00322556	0.0153312	1	2.01958	2.80381
PG3955	Q543N5;Q9QYB1	Chloride intracellular channel protein;Chloride intracellular channel protein 4	Clic4	0.0161662	-0.0125687	0.00383879	0.00668921	1159	1.02746	0.679869	0.0032314	0.0153457	1	1.01015	1.01231	1.05993
PG3706	Q3UIH7;Q9JHK4;Q9JHK4-2	Geranylgeranyl transferase type-2 subunit alpha	Rabggta	0.15023	0.186862	-0.174818	0.238984	1160	1.11642	0.70694	0.00323975	0.0153721	1	1.05696	0.956574	1.33574
PG5690	Q9CWE0;D6RCX5;D3Z0X8;D3YW54	Mitochondrial fission regulator 1-like	Mtfr1l	-0.201258	-0.277211	0.288915	-0.298348	1161	-1.13459	0.112282	0.00325176	0.0154059	1	-1.11828	-0.926154	-1.35934
PG2106	Q99L15;O55137	Acyl-coenzyme A thioesterase 1	Acot1	1.218	1.78995			1162	-2.57841	0.015625	0.00325465	0.0154059	1	-2.12278	-3.03403
PG4948	Q8CGK3;Q3V2D0;Q56A16	Lon protease homolog, mitochondrial	Lonp1	-0.0264392	-0.243343	0.0739082	-0.271269	1163	1.06883	0.693859	0.00326007	0.0154059	1	1.1638	1.13122	0.911478
PG2445	Q3TG75;P29758;Q3UKT3;Q3UJK5	Ornithine aminotransferase, mitochondrial	Oat	-0.416779	-0.248448	0.54838	-0.24574	1164	-1.26622	0.0964753	0.00326055	0.0154059	1	-1.38853	-0.89102	-1.51911
PG4397	Q6ZWX6	Eukaryotic translation initiation factor 2 subunit 1	Eif2s1	0.0233078	-0.144877	0.00567158	-0.155238	1165	1.03412	0.681504	0.00326203	0.0154059	1	1.09899	1.0382	0.965165
PG2979	Q542W3;Q3U541;Q3U6B1;P97379-2;P97379;Q3U931;A0A0J9YTQ8	Ras GTPase-activating protein-binding protein 2	G3bp2	0.0129586	-0.0790801	0.0130159	-0.0741589	1166	-1.02394	0.125	0.00326369	0.0154059	1	-1.00377	-1.02399	-1.04405
PG2507	P37913	DNA ligase 1	Lig1	-0.10132	-0.137059	0.156411	-0.135566	1167	-1.04398	0.122275	0.00329154	0.0155241	1	-1.05405	-0.9418	-1.13607
PG0666	B2RRC5;A2AWA9;A2AWA9-2	Rab GTPase-activating protein 1	Rabgap1	-1.43143	-0.895712	1.83206	-0.95252	1168	2.84317	0.969477	0.00330191	0.0155597	1	2.5306	4.15099	1.84791
PG4684	Q8BLY7	Hermansky-Pudlak syndrome 6 protein homolog	Hps6	-0.252788	0.021169	0.327803	0.0697109	1169	1.10543	0.704033	0.00331471	0.015598	1	0.916399	1.29879	1.1011
PG1624	E9QME5;E9QP19;Q99PP7-2;Q99PP7	E3 ubiquitin-protein ligase TRIM33	Trim33	0.337071	-0.236835	-0.36809	-0.292904	1170	-1.18387	0.106286	0.00331691	0.015598	1	-0.887607	-1.41313	-1.25089
PG3544	Q8BYC5;Q3U4M0;Q9EQN3;Q3U413;Q8BV82;Q3U1U6;Q3TCX6	TSC22 domain family protein 4	Tsc22d4	-0.193279	0.506159	0.217018	0.656304	1171	-1.38266	0.0828488	0.00332082	0.015598	1	-1.8246	-1.32826	-0.995116
PG4060	Q5SVT2;Q99PP9-3;Q99PP9;Q5SVT1;Q99PP9-2	Tripartite motif-containing protein 16	Trim16	0.215496	0.634344	-0.289616	0.779368	1172	1.52249	0.804324	0.00332139	0.015598	1	1.23552	1.22615	2.1058
PG5016	Q8K120-2;Q8K120	Nuclear factor of activated T-cells, cytoplasmic 4	Nfatc4	-0.0312833	0.141186	0.0492566	0.19805	1173	-1.06392	0.119731	0.00332742	0.0156076	1	-1.19884	-1.07015	-0.922779
PG5884	Q9D6S7	Ribosome-recycling factor, mitochondrial	Mrrf	-0.463299	0.937759	0.510684	1.20459	1174	2.00652	0.896984	0.00332977	0.0156076	1	1.15724	2.19528	2.66703
PG5034	Q8K1Z0;F6SFF5	Ubiquinone biosynthesis protein COQ9, mitochondrial	Coq9	0.717585	-0.0899239	-0.841888	-0.144704	1175	1.52366	0.804688	0.00333193	0.0156076	1	1.94789	0.962718	1.66038
PG0094	E9Q9M5;A0A0A6YWX1;J3KMM1;Q3UJD6-2;Q3UJD6;A0A0A6YWN9	Ubiquitin carboxyl-terminal hydrolase;Ubiquitin carboxyl-terminal hydrolase 19	Usp19	-0.0761018	-0.378543	0.144959	-0.432102	1176	1.14805	0.715843	0.00333618	0.0156142	1	1.29486	1.2756	0.873701
PG3679	Q3UPY7;Q3UGP8	Putative Dol-P-Glc:Glc(2)Man(9)GlcNAc(2)-PP-Dol alpha-1,2-glucosyltransferase	Alg10b	0.936934	-1.24851			1177	-1.84863	0.0485102	0.00333963	0.0156171	1		-1.75022	-1.94705
PG1451	E9PZF0;Q5NC82;Q01768;B0LAA8;Q8R4B4	Nucleoside diphosphate kinase;Nucleoside diphosphate kinase B	Gm20390;Nme2	0.100846	-0.507939	-0.0596685	-0.604291	1178	-1.25438	0.0977471	0.00334381	0.0156234	1	-0.931281	-1.24381	-1.58806
PG0233	A0A0R4J0B4;Q99KK2-2;Q99KK2	N-acylneuraminate cytidylyltransferase	Cmas	-0.350446	-1.49671			1179	1.815	0.862645	0.00334929	0.0156357	1	1.86251	1.7675
PG6255	Q9Z0E0-2;Q9Z0E0	Neurochondrin	Ncdn	-0.192303	0.115234	0.246876	0.1795	1180	1.09545	0.701672	0.00335648	0.0156432	1	0.884985	1.22275	1.1786
PG0527	A2A7S7;Q91WQ3	Tyrosine--tRNA ligase;Tyrosine--tRNA ligase, cytoplasmic;Tyrosine--tRNA ligase, cytoplasmic, N-terminally processed	Yars	-0.180854	0.114571	0.233023	0.17776	1181	1.09008	0.700763	0.00335659	0.0156432	1	0.886475	1.20837	1.1754
PG3493	Q3U5I5;Q3U1Q4;Q60631;B1AT92;Q60631-2	Growth factor receptor-bound protein 2	Grb2	0.28697	-0.183589	-0.31147	-0.223896	1182	-1.12746	0.11319	0.00337117	0.0156979	1	-0.890918	-1.32672	-1.16473
PG6090	Q9JHS9;A0A1L1SVD8	Spliceosome-associated protein CWC15 homolog	Cwc15	0.0977435	0.627661	-0.146076	0.780798	1183	1.47661	0.795967	0.00339759	0.0158058	1	1.12713	1.2756	2.02709
PG5919	Q9D8S9	BolA-like protein 1	Bola1	0.258396	0.490348	-0.330283	0.600279	1184	-1.38032	0.0830305	0.00340217	0.0158058	1	-1.55801	-1.68379	-0.899147
PG1512	E9Q4K7	Kinesin-like protein	Kif13b	1.83336	1.02833			1185	2.49472	0.946948	0.00340454	0.0158058	1	2.05648		2.93296
PG6011	Q9DCL9	Multifunctional protein ADE2;Phosphoribosylaminoimidazole-succinocarboxamide synthase;Phosphoribosylaminoimidazole carboxylase	Paics	-0.176214	0.0362798	0.233605	0.0819089	1186	1.06139	0.691134	0.00340584	0.0158058	1	0.906646	1.19072	1.08679
PG1401	E9PWC8;E9PZR3;E9QAN2;Q3V141;Q61183;Q61183-4;Q61183-3;F7CXD5;F6VTN8;Q61183-2	Poly(A) polymerase alpha	Papola	0.677484	-0.818952	-0.735295	-1.03047	1187	1.89647	0.878815	0.00341487	0.0158344	1	2.72872	1.50498	1.45571
PG0764	A8Y5G9;Q3UPL7;Q8QZX5	U7 snRNA-associated Sm-like protein LSm10	Lsm10	0.694802	-0.401775	-0.789456	-0.523145	1188	-1.58383	0.0641352	0.00342137	0.0158402	1	-0.988238	-2.06779	-1.69545
PG4604	Q8BH59	Calcium-binding mitochondrial carrier protein Aralar1	Slc25a12	-0.233114	-0.000787641	0.305653	0.0413349	1189	1.08211	0.697856	0.00342437	0.0158402	1	0.917151	1.26389	1.06528
PG3973	Q548K2;Q9D748;Q64437;Q3UMM7	Alcohol dehydrogenase class 4 mu/sigma chain	Adh7	-1.22361	-0.647733	1.55998	-0.667022	1190	-2.38177	0.021984	0.00342704	0.0158402	1	-2.72355	-1.28672	-3.13505
PG6198	Q9R061	Cytosolic Fe-S cluster assembly factor NUBP2	Nubp2	0.216779	-0.178138	-0.226657	-0.211538	1191	1.08205	0.697674	0.00342846	0.0158402	1	1.27575	0.93783	1.03255
PG5255	Q8VEH5	EPM2A-interacting protein 1	Epm2aip1	-0.261541	-0.245215	0.359587	-0.254426	1192	1.1364	0.713118	0.00343235	0.0158402	1	1.09979	1.38697	0.922445
PG6050	Q9EQQ2	Protein YIPF5	Yipf5	0.132154	0.177709	-0.152138	0.229293	1193	1.08953	0.700581	0.00343778	0.0158402	1	1.02528	0.94585	1.29748
PG0145	Q3UYM1;A0A0G2JGQ4;P54729;A0PJ90;A0JLP6	NEDD8 ultimate buster 1	Nub1	0.393526	-0.0954563	-0.447881	-0.125089	1194	1.18209	0.725654	0.00344202	0.0158402	1	1.4267	0.881079	1.23848
PG4750	Q8BU30	Isoleucine--tRNA ligase, cytoplasmic	Iars	-0.297147	-0.231923	0.401774	-0.23532	1195	1.15238	0.718023	0.00344283	0.0158402	1	1.08783	1.42889	0.940428
PG5503	Q99LC2	Cleavage stimulation factor subunit 1	Cstf1	0.301183	-0.205941	-0.326957	-0.25231	1196	1.13738	0.713299	0.00344384	0.0158402	1	1.39514	0.930971	1.08602
PG4472	Q80TM9;B7ZN33;Q80TM9-3;Q80TM9-2	Nischarin	Nisch	-0.456031	-0.312423	0.601131	-0.320563	1197	1.31063	0.755996	0.0034449	0.0158402	1	1.20396	1.72925	0.998682
PG3625	Q3UCC5;Q6P8I4;F8WI88;D3YWA4;Q3TM89;Q3KQH9	PEST proteolytic signal-containing nuclear protein	Pcnp	-0.698957	-0.730499	0.929362	-0.810633	1198	1.83918	0.866642	0.00345021	0.0158514	1	1.84238	2.53068	1.14447
PG2457	P31254	Ubiquitin-like modifier-activating enzyme 1 Y	Uba1y	-1.90624	-1.22532			1199	-2.62394	0.0150799	0.00346123	0.0158819	1	-2.13512		-3.11277
PG0602	A2AL85;Q8BSY0;Q8CBM2;Q9EQ66;Q8BQK0	Aspartyl/asparaginyl beta-hydroxylase	Asph;ASPH	0.460724	0.217228	-0.554323	0.250755	1200	1.30561	0.75436	0.00346263	0.0158819	1	1.40344	0.891981	1.62142
PG2228	P05202	Aspartate aminotransferase, mitochondrial	Got2	-0.396179	-0.0661507	0.508885	-0.0251083	1201	-1.19066	0.10556	0.00346899	0.0158978	1	-1.40903	-0.866281	-1.29667
PG6036	Q9EPL8	Importin-7	Ipo7	0.0172353	-0.227251	0.0195878	-0.255198	1202	1.04386	0.685865	0.00347382	0.0159068	1	1.15396	1.06832	0.909289
PG2624	P51949	CDK-activating kinase assembly factor MAT1	Mnat1	-0.192098	0.0684416	0.250342	0.122422	1203	1.0703	0.694404	0.00348024	0.0159229	1	0.887593	1.20626	1.11704
PG5912	Q9D880	Mitochondrial import inner membrane translocase subunit TIM50	Timm50	-0.418428	-0.313744	0.555567	-0.325232	1204	-1.27551	0.0953852	0.00348431	0.0159283	1	-1.36018	-0.886688	-1.57967
PG4766	Q8BVL3	Sorting nexin-17	Snx17	-0.201029	-0.08185	0.273123	-0.0601287	1205	1.0577	0.690044	0.00350017	0.0159875	1	0.958738	1.22913	0.985234
PG0201	A0A0R4IZY0;Q8C1A5	Thimet oligopeptidase	Thop1	0.0511043	-0.113644	-0.0305672	-0.119412	1206	1.01143	0.676054	0.00351067	0.0160222	1	1.07354	0.987413	0.973327
PG4449	Q7TPM9	Myotubularin-related protein 10	Mtmr10	-0.562233	0.333987	0.678783	0.476358	1207	1.47087	0.794695	0.00351844	0.0160344	1	0.922415	1.85248	1.6377
PG3878	Q4FJR0;Q8R2U6	Diphosphoinositol polyphosphate phosphohydrolase 2	Nudt4	-0.874609	1.27924			1208	1.92469	0.884629	0.00351917	0.0160344	1		1.73612	2.11325
PG0777	B0R091;P61022	Calcineurin B homologous protein 1	Chp1	0.208583	0.361667	-0.259568	0.447407	1209	-1.23203	0.100654	0.00353052	0.0160728	1	-1.36182	-1.47145	-0.862816
PG4969	Q8CI32	BAG family molecular chaperone regulator 5	Bag5	0.195656	-0.116732	-0.20588	-0.134937	1210	1.05053	0.6875	0.00353511	0.0160804	1	1.19604	0.911611	1.04393
PG4212	Q69Z38;A0A087WQ01	Pseudopodium-enriched atypical kinase 1	Peak1	-0.618384	0.0282763	0.771254	0.10812	1211	1.4066	0.780523	0.00354205	0.0160962	1	1.00705	1.8907	1.32205
PG2709	Q5I0X8;P58466;G3UXN0;P58465	Carboxy-terminal domain RNA polymerase II polypeptide A small phosphatase 1;CTD small phosphatase-like protein	Ctdsp1;Ctdspl	-0.134249	-0.181818	0.199958	-0.18747	1212	1.04545	0.686773	0.00354693	0.0160962	1	1.04323	1.18237	0.910748
PG5179	Q8VBT0;F6V084	Thioredoxin-related transmembrane protein 1	Tmx1	0.750627	0.994454	-0.968127	1.17498	1213	2.23483	0.925145	0.00354968	0.0160962	1	2.03714	1.44308	3.22427
PG1726	Q6ZQ23;F8VQ54;Q8R418-2;Q8R418;Q3UUV8	Endoribonuclease Dicer	Dicer1	2.11956	-0.197592			1214	2.49107	0.946221	0.0035503	0.0160962	1	2.93975		2.0424
PG5098	Q8R016;E9PY26	Bleomycin hydrolase	Blmh	0.567993	-0.328639	-0.641254	-0.423643	1215	-1.4002	0.0797602	0.003557	0.0161134	1	-0.919385	-1.79664	-1.48459
PG2318	Q3TAQ8;P15327;D3YUE8;D3Z223	Bisphosphoglycerate mutase;Phosphoglycerate mutase	Bpgm	1.4001	0.40219			1216	1.79847	0.859738	0.00356507	0.0161366	1	1.71768		1.87926
PG5896	Q9D7J4	Cytochrome c oxidase protein 20 homolog	Cox20	0.016904	0.384377	-0.0285779	0.490695	1217	1.20632	0.731286	0.00357274	0.0161581	1	0.954935	1.11575	1.54827
PG4377	Q6ZQ38;Q3UMI9	Cullin-associated NEDD8-dissociated protein 1	Cand1	-0.284763	-0.281315	0.390656	-0.29656	1218	1.15391	0.718568	0.00358606	0.0161999	1	1.12552	1.42983	0.906372
PG3605	Q3UA16-3;Q3UA16;A2AUT3;A2AUT4;Q3UA16-2	Kinetochore protein Spc25	Spc25	-1.04808	0.952618			1219	1.78212	0.857922	0.00358787	0.0161999	1		1.84124	1.723
PG0196	A0A0R3P9D3;D3YY67;Q5U4E2;E9Q8A0	Replication initiator 1	Repin1	0.0963581	-0.574696	-0.0489166	-0.685335	1220	1.29239	0.750727	0.00359985	0.0162362	1	1.65239	1.31913	0.905643
PG2254	Q8CD23;P09405;Q8CE30;Q3TL52;Q3TGR3;Q9CT46	Nucleolin	Ncl	0.215526	-0.267656	-0.218026	-0.320602	1221	-1.10188	0.116279	0.00360181	0.0162362	1	-0.855995	-1.22822	-1.22142
PG0780	B0V2Q7;Q3UN02;B0V2Q9	Lysocardiolipin acyltransferase 1	Lclat1	0.113552	-0.119252	-0.105964	-0.131331	1222	1.01678	0.676781	0.00360763	0.0162491	1	1.11745	0.943938	0.988964
PG5780	Q9CZU4;Q9ESC4;Q9ESC5;Q8R4A7	GTPase Era, mitochondrial	Eral1;Era	-0.862533	1.30876			1223	1.94062	0.8879	0.00361529	0.0162703	1		1.73154	2.14971
PG2395	Q3UKQ5;Q3UF03;P24668	Cation-dependent mannose-6-phosphate receptor	M6pr	0.0778736	-0.071616	-0.0664158	-0.0703375	1224	1.003	0.673692	0.00362378	0.0162919	1	1.05539	0.949676	1.00393
PG1176	D3YVM8;O55102;D3Z4L7	Biogenesis of lysosome-related organelles complex 1 subunit 1	Bloc1s1	1.41361	0.234158			1225	1.76716	0.855741	0.00362602	0.0162919	1	1.80369		1.73062
PG5844	Q9D1R9;A0A0G2JEY6;A0A0G2JGY8	60S ribosomal protein L34	Rpl34	0.232277	-0.42428	-0.225934	-0.512963	1226	-1.20277	0.103561	0.00363008	0.0162969	1	-0.854917	-1.31297	-1.44043
PG2358	Q3U9G2;P20029;Q3TWF2;Q9DC41;Q3U7T8;Q3TKF8;Q3TI47;Q3U6V3;Q3UEM8	78 kDa glucose-regulated protein	Hspa5	0.150645	0.252292	-0.180518	0.31874	1227	-1.12239	0.113554	0.00364011	0.0163286	1	-1.22027	-1.2949	-0.851991
PG5117	Q8R1B4;Q66JU1	Eukaryotic translation initiation factor 3 subunit C	Eif3c	0.023615	-0.23522	0.0124725	-0.265434	1228	1.03473	0.681686	0.0036453	0.0163386	1	1.15315	1.0556	0.895451
PG5200	Q8VCN5	Cystathionine gamma-lyase	Cth	-0.0837411	-0.12494	0.134099	-0.122217	1229	1.01051	0.67569	0.00365255	0.0163577	1	1.00319	1.09635	0.931976
PG5543	Q99N92	39S ribosomal protein L27, mitochondrial	Mrpl27	0.478938	0.0571933	-0.563735	0.0541156	1230	1.24621	0.740007	0.0036711	0.0164274	1	1.44885	0.848189	1.44159
PG3631	Q8C2Q8;Q9D9D7;Q3UD06;Q91VR2;A2AKU9;Q9ERA8;A2AKV1;A2AKV2;A2AKV3	ATP synthase subunit gamma;ATP synthase subunit gamma, mitochondrial	Atp5c1	0.360838	-0.768435	-0.354742	-0.94311	1231	1.58259	0.819586	0.00367566	0.0164338	1	2.2063	1.43455	1.10692
PG3956	Q543N7;Q99JB8	Protein kinase C and casein kinase II substrate protein 3	Pacsin3	0.358458	0.151158	-0.424875	0.178505	1232	1.17512	0.724019	0.00367851	0.0164338	1	1.25426	0.855639	1.41545
PG4639	Q8BIJ6;E9PWN2;Q8R2M5;E9PWN3	Isoleucine--tRNA ligase, mitochondrial	Iars2	-0.446634	-0.315515	0.589964	-0.325097	1233	-1.28225	0.0944767	0.00368149	0.0164338	1	-1.38178	-0.870553	-1.5944
PG3580	Q3U7Z6;Q9DBJ1;Q6NWV5	Phosphoglycerate mutase 1	Pgam1	-0.1543	0.069564	0.204347	0.120716	1234	1.03958	0.683503	0.00368577	0.0164396	1	0.877546	1.14513	1.09606
PG1987	Q540I4;O08917;Q3TJS0;G3UYU4	Flotillin-1	Flot1	0.0459184	-0.576645	0.0124969	-0.683608	1235	-1.27884	0.0950218	0.00370397	0.0165022	1	-0.946156	-1.21144	-1.67894
PG4876	Q8C7E9	Cleavage stimulation factor subunit 2 tau variant	Cstf2t	0.693456	-0.886392	-0.749339	-1.11402	1236	1.93843	0.887173	0.00370608	0.0165022	1	2.81953	1.54689	1.44886
PG3233	Q91Z78;Q3TEW0;Q9Z2F7	BCL2/adenovirus E1B 19 kDa protein-interacting protein 3-like	Bnip3l	0.177133	-0.424728	-0.158926	-0.509023	1237	1.17412	0.723474	0.00371273	0.0165022	1	1.49112	1.10806	0.923177
PG4304	Q6P9P6	Kinesin-like protein KIF11	Kif11	-0.031474	-0.501483	0.100521	-0.585655	1238	1.20851	0.732013	0.00371364	0.0165022	1	1.45312	1.32358	0.848829
PG3344	Q3U7P4;Q3TM10;Q6PGH2;Q3TJZ7	Hematological and neurological expressed 1-like protein	Hn1l	0.379463	0.170172	-0.451895	0.199983	1239	-1.19541	0.104469	0.00371769	0.0165022	1	-1.11564	-1.53525	-0.935326
PG0883	D3Z4U0;B2RRT9;Q9R020;A0A0H2UH20;E9PUD0;Q9R020-2	Zinc finger Ran-binding domain-containing protein 2	Zranb2	-0.850918	1.37385			1240	1.98846	0.893714	0.00371787	0.0165022	1		1.74188	2.23504
PG6141	Q9JL35	High mobility group nucleosome-binding domain-containing protein 5	Hmgn5	0.236903	-0.536556	-0.222637	-0.650257	1241	1.28848	0.75	0.0037208	0.0165022	1	1.70527	1.19575	0.964424
PG5850	Q9D2E2-2;Q9D2E2;F6ZMT3	Target of EGR1 protein 1	Toe1	0.0893588	0.0841936	-0.092737	0.118734	1242	1.01865	0.677507	0.00373064	0.0165326	1	0.985485	0.926786	1.14369
PG1242	D3Z0M2;Q9D3D8;D3Z191;Q80X71;D3Z6E0	Transmembrane protein 106B	Tmem106b	0.364213	0.318012	-0.445114	0.381511	1243	-1.26639	0.0962936	0.00373507	0.0165389	1	-1.28257	-1.62192	-0.894692
PG2889	P70245;A2AC29	3-beta-hydroxysteroid-Delta(8),Delta(7)-isomerase	Ebp	1.25896	-0.990825			1244	-1.8929	0.0459666	0.00375293	0.0165809	1		-2.08557	-1.70023
PG0782	B1AQF4;Q9D7X3;H3BKL8;Q3V2Y9	Dual specificity protein phosphatase 3	Dusp3	-0.0880577	-0.208754	0.145997	-0.224076	1245	-1.02681	0.124273	0.00375354	0.0165809	1	-0.987051	-0.921715	-1.17166
PG1555	E9Q7N5;Q8R2Q4-3;Q8R2Q4-2;Q8R2Q4;Q8C1C2;Q3TML3;Q3TSU6;E0CY79	Ribosome-releasing factor 2, mitochondrial	Gfm2	-0.240225	-0.0661208	0.319478	-0.0377588	1246	-1.05861	0.120276	0.00375359	0.0165809	1	-1.18898	-0.858832	-1.12801
PG1606	P0DOV2;E9QKL6		Ifi204	0.39869	-0.625003	-0.412103	-0.771278	1247	-1.45237	0.0739462	0.00376448	0.0166089	1	-0.892023	-1.65768	-1.80739
PG0339	A0A0U1RNK7;E9PX48;A2A9M5;A2A9M4;Q8R1A4-2;Q8R1A4	Dedicator of cytokinesis protein 7	Dock7	-0.206148	-0.00783812	0.273463	0.0305434	1248	1.04174	0.684775	0.00376716	0.0166089	1	0.896173	1.20331	1.02575
PG1869	Q4KML9;G5E8J4;Q62136;Q9QWQ7;Q6NXW5;Q7TMG1;Q05DI4	Protein-tyrosine-phosphatase;Tyrosine-protein phosphatase non-receptor type 21	Ptpn21	0.036624	0.156033	-0.0343954	0.210631	1249	-1.0369	0.123183	0.00377156	0.0166089	1	-1.14227	-1.10018	-0.86826
PG0161	A0A0J9YVG2;A0A0J9YUK1;A0A0J9YUP9;A0A0J9YUZ0;Q8CE98;Q60722-3;Q60722;A0A0J9YUG4;A0A0J9YTU7;A0A0J9YTW1;A0A0J9YU37;A0A0J9YVI1;E9Q8G4;Q91YV0;A0A0J9YTR9;Q91XK1;Q3UZE5;Q60722-2;A0A0J9YUT7	Transcription factor 4	Tcf4	-0.860643	1.19486			1250	1.8381	0.866097	0.00377404	0.0166089	1		1.68315	1.99305
PG5860	Q9D3B1	Very-long-chain (3R)-3-hydroxyacyl-CoA dehydratase 2	Hacd2	-1.3678	-1.97381			1251	2.73061	0.961483	0.00377503	0.0166089	1	2.1806	3.28062
PG0842	B1GX80;B1GX81;Q61036-2;Q61036;A3KGC5	Non-specific serine/threonine protein kinase;Serine/threonine-protein kinase PAK 3	Pak3	0.484173	-0.358379	-0.537093	-0.453091	1252	-1.31681	0.0904797	0.00378195	0.0166141	1	-0.86573	-1.64068	-1.44403
PG1021	E9QAF9;B9EJ77;Q0VGY8;Q0VGY8-2;Q8CHA0	Protein TANC1	Tanc1	-0.438285	0.284435	0.532183	0.405848	1253	1.30528	0.753997	0.00378288	0.0166141	1	0.856054	1.59722	1.46258
PG2079	O54774;Q3U237;Q3UR54;Q8CGH7;Q05CQ3	AP-3 complex subunit delta-1	Ap3d1	0.253185	0.0698186	-0.290562	0.087877	1254	1.07233	0.695494	0.00378525	0.0166141	1	1.1401	0.852285	1.22459
PG0807	B1AUN2;A4FUS0;A0AUM9;B1AUN3;Q3UKV0		Eif2b3	0.00809258	0.0377158	0.00965117	0.0686667	1255	0.993993	0.671693	0.00379539	0.0166445	1	0.942419	0.975813	1.06375
PG6237	Q9WUP7-2	Ubiquitin carboxyl-terminal hydrolase isozyme L5	Uchl5	0.314399	-0.401707	-0.327463	-0.492116	1256	-1.21652	0.102108	0.00379824	0.0166445	1	-0.835656	-1.39659	-1.41732
PG5995	Q9DC50	Peroxisomal carnitine O-octanoyltransferase	Crot	0.168206	0.045828	-0.18545	0.065534	1257	1.02533	0.679688	0.0038126	0.0166811	1	1.05932	0.877702	1.13896
PG5009	Q8K0G5	Protein TSSC1	Tssc1	0.203436	0.20056	-0.240524	0.25136	1258	1.09843	0.702762	0.00381266	0.0166811	1	1.0609	0.893487	1.3409
PG2619	P51859;E0CXA0	Hepatoma-derived growth factor	Hdgf	0.682263	-1.01592	-0.725459	-1.27106	1259	2.0502	0.903343	0.00382242	0.016696	1	3.0015	1.69202	1.45708
PG1711	F8VPL2;Q61194;Q61194-2	Phosphatidylinositol 4-phosphate 3-kinase C2 domain-containing subunit alpha	Pik3c2a	-0.151327	0.229019	0.188074	0.314926	1260	1.09843	0.702943	0.00382516	0.016696	1	0.843879	1.17155	1.27986
PG3779	Q3UR33;Q61029;Q3U7B3;Q3U955;Q3TNH0;Q61029-3;Q78WP6	Lamina-associated polypeptide 2, isoforms beta/delta/epsilon/gamma	Tmpo	0.477161	0.0859752	-0.563862	0.0893589	1261	1.23832	0.737645	0.00382516	0.016696	1	1.42296	0.836297	1.45571
PG1422	E9PXB7;Q3TQK9;Q8CFI0-3;Q8CFI0;Q641N8	E3 ubiquitin-protein ligase NEDD4-like	Nedd4l	-0.345535	0.271087	0.420598	0.382025	1262	1.22368	0.735283	0.00383427	0.0167225	1	0.83468	1.44403	1.39234
PG4309	Q6P9R4-2;Q6P9R4;Q6P9R4-3	Rho guanine nucleotide exchange factor 18	Arhgef18	0.128875	0.464707	-0.170945	0.579546	1263	1.27066	0.744549	0.00384167	0.0167415	1	1.03502	1.0755	1.70147
PG3643	Q497F8;Q3UDR8;F6YIY0	Protein YIPF;Protein YIPF3;Protein YIPF3, N-terminally processed	Yipf3	-1.38037	-1.97437			1264	2.73569	0.962028	0.00386467	0.0168284	1	2.17723	3.29416
PG1591	E9QB02;Q68FL6	Methionine--tRNA ligase, cytoplasmic	Mars	-0.231396	-0.242696	0.322775	-0.253806	1265	1.08514	0.699128	0.00386839	0.0168313	1	1.06405	1.31114	0.880213
PG3313	Q3TJG6;Q9R0Q7;D3Z7C6;Q9CRH1	Prostaglandin E synthase 3	Ptges3	0.252111	-0.327828	-0.257681	-0.396956	1266	1.12932	0.711301	0.00388692	0.016897	1	1.43139	0.985089	0.97147
PG4773	Q8BWA4;Q9JIZ5		Tfap4	-0.0889866	-1.74827			1267	2.01704	0.898256	0.00388962	0.016897	1	2.29335	1.74073
PG0738	A6H6A9	Rab GTPase-activating protein 1-like	Rabgap1l	-0.907099	1.03191			1268	1.73304	0.849201	0.00390331	0.0169431	1		1.68094	1.78514
PG6081	Q9ET22	Dipeptidyl peptidase 2	Dpp7	0.710339	-0.210652	-0.823502	-0.29134	1269	1.4729	0.79524	0.0039188	0.016995	1	1.96436	0.940501	1.51385
PG2410	P26443;Q3TSQ7	Glutamate dehydrogenase 1, mitochondrial	Glud1	-0.440625	0.226539	0.539622	0.335436	1270	1.26355	0.742551	0.00392145	0.016995	1	0.847196	1.56826	1.37518
PG5115	Q8R149-2;Q8R149;F6ZBW5;A0A1L1SSX5	BUD13 homolog	Bud13	-0.837141	1.24167			1271	1.85968	0.87064	0.00394437	0.0170809	1		1.66993	2.04942
PG4129	Q61206;A0A1L1SVK0;Q8BTA2;A0A1L1SRD0	Platelet-activating factor acetylhydrolase IB subunit beta	Pafah1b2	0.0743191	-0.0394647	-0.0646519	-0.0308405	1272	0.979528	0.666788	0.00396407	0.0171527	1	1.01092	0.922986	1.00468
PG1285	D3Z5T2;Q9D0L7;Q9D0L7-2	Armadillo repeat-containing protein 10	Armc10	-0.397735	-1.06122	0.589791	-1.23845	1273	1.90599	0.881177	0.0039974	0.0172833	1	2.27456	2.41918	1.02424
PG4189	Q91YS7;Q63932;Q3UPM3	Dual specificity mitogen-activated protein kinase kinase 2	Map2k2	-0.0777926	-0.237981	0.135851	-0.260552	1274	1.01944	0.678052	0.00400099	0.0172853	1	1.08226	1.12185	0.854223
PG5659	S4R287;Q9CR27;G3UWG7;S4R1P7;Q9CYF6	WASH complex subunit CCDC53	Ccdc53	1.35954	0.440467			1275	1.76069	0.854469	0.00400511	0.0172895	1	1.64699		1.87439
PG0753	A6X919;A6X919-3;A6X919-2	Probable C-mannosyltransferase DPY19L1	Dpy19l1	-0.203205	-0.614011	0.318023	-0.70891	1276	-1.32521	0.0899346	0.00402963	0.0173817	1	-1.11104	-1.05173	-1.81286
PG0455	A0A1L1STE6;Q9D6R2;Q9D6R2-2	Isocitrate dehydrogenase [NAD] subunit alpha, mitochondrial	Idh3a	0.0602968	-0.216248	-0.033584	-0.245283	1277	1.00408	0.674055	0.00403346	0.0173846	1	1.13199	0.992065	0.888188
PG1652	F2Z3U3;F2Z4B7;G5E867		Raph1	-0.0454214	-0.263089	0.09853	-0.293804	1278	1.02314	0.678961	0.00403816	0.0173913	1	1.11906	1.10442	0.845955
PG2991	Q3UWF9;P97465	Docking protein 1	Dok1	-0.821734	1.33224			1279	1.92689	0.884993	0.0040542	0.0174467	1		1.68536	2.16843
PG1781	Q3TTF6;H3BKU1;G3UWS4;Q7TNP2;Q8BIX1;H3BLQ0;H3BLE7;H3BIV7	Serine/threonine-protein phosphatase 2A 65 kDa regulatory subunit A beta isoform	Ppp2r1b	0.0172924	0.268906	-0.0198803	0.34985	1280	1.08025	0.697311	0.0040651	0.0174799	1	0.897294	1.01114	1.33231
PG4584	Q8BGF3;Q80VY1;Q8BKZ6	WD repeat-containing protein 92	Wdr92	0.668812	-0.0389886	-0.786699	-0.0786222	1281	-1.39222	0.0812137	0.004083	0.0175432	1	-1.0256	-1.9238	-1.22725
PG3192	Q3TC46	Protein PAT1 homolog 1	Patl1	-0.0272879	-0.673696	0.109112	-0.796004	1282	1.34316	0.763808	0.004088	0.017551	1	1.69186	1.48734	0.850267
PG4754	Q8BUI3;H9KV12	Leucine-rich repeat and WD repeat-containing protein 1	LRWD1;Lrwd1	-0.0318091	0.787126	-0.00139742	0.9858	1283	1.584	0.820131	0.00409601	0.0175717	1	1.06721	1.45643	2.22835
PG5752	Q9CYL5;B1AWD6	Golgi-associated plant pathogenesis-related protein 1	Glipr2	0.10437	-0.396728	-0.0727795	-0.468959	1284	1.10473	0.70367	0.00410474	0.0175954	1	1.36413	1.09153	0.858544
PG1702	F7BGR7;J3QPA9;B7ZN14;A1L3S3;Q8C7Q4;F6TBN8;Q8VE92;B0LM42	RNA-binding protein 4;RNA-binding protein 4B	Gm21992;Rbm4;Rbm4b	-0.0726602	-0.280575	0.133	-0.312911	1285	1.03061	0.680959	0.00411509	0.0176221	1	1.12148	1.13694	0.833401
PG3061	Q497I3;Q05816;Q3TLH6	Fatty acid-binding protein, epidermal	Fabp5	-0.0750913	0.506479	0.0734542	0.647079	1286	-1.2805	0.0948401	0.00411738	0.0176221	1	-1.65593	-1.32059	-0.864991
PG5288	Q91V98;A0A172Q386	Endosialin	Cd248	-0.950974	2.23475			1287	2.83599	0.969295	0.00412795	0.0176536	1		2.22456	3.44742
PG6182	Q9QZB7	Actin-related protein 10	Actr10	-0.583825	0.0959216	0.723911	0.1878	1288	1.32965	0.761083	0.0041346	0.0176554	1	0.909644	1.77339	1.30592
PG2585	Q3U3I5;P49135;Q3TVD8	TFIIH basal transcription factor complex helicase XPB subunit	Ercc3	-0.137109	0.191728	0.173768	0.268293	1289	1.05183	0.688045	0.00413626	0.0176554	1	0.827336	1.12063	1.20754
PG5812	Q9D0R2;Q3U630;Q99KJ4	Threonine--tRNA ligase, cytoplasmic	Tars	-0.232576	0.127302	0.294828	0.197494	1290	1.06215	0.69186	0.00414082	0.0176554	1	0.821836	1.21936	1.14526
PG5907	Q9D824;Q9D824-3;Q9D824-2	Pre-mRNA 3-end-processing factor FIP1	Fip1l1	0.182295	-0.00286334	-0.198695	0.00500997	1291	1.00125	0.672965	0.00414595	0.0176554	1	1.07195	0.85154	1.08024
PG1864	G5E8C4;Q8BRH0;A0A0R4J173;Q8BRH0-2	Transmembrane and TPR repeat-containing protein 3	Tmtc3	0.324659	-0.612474	-0.323187	-0.749977	1292	1.36281	0.767624	0.00414658	0.0176554	1	1.87397	1.21428	1.00018
PG0768	A9C491;Q8VE73-3;Q8VE73	Cullin-7	Cul7	-0.372359	-0.495312	0.514034	-0.550397	1293	1.30023	0.75218	0.00414761	0.0176554	1	1.34882	1.68647	0.865394
PG3047	Q03265;D3Z6F5	ATP synthase subunit alpha, mitochondrial;ATP synthase subunit alpha	Atp5a1	-0.164817	-0.140868	0.23383	-0.135046	1294	1.00468	0.674237	0.00416169	0.0177017	1	0.961021	1.15831	0.894724
PG1808	G3X8Q0;O89090;A2TH11;O89090-2	Transcription factor Sp1	Sp1	0.94096	0.0724792	-1.12607	0.0351706	1295	1.71281	0.845749	0.00417232	0.0177332	1	2.16716	0.942792	2.02847
PG6244	Q9WV98	Mitochondrial import inner membrane translocase subunit Tim9	Timm9	-0.501432	1.41544	0.519064	1.79021	1296	2.50448	0.947856	0.0041771	0.0177398	1	1.35151	2.63367	3.52827
PG1484	Q8BUZ9;Q3U224;E9Q2I4		Elmsan1	-0.951913	0.93538			1297	1.68544	0.839026	0.00419145	0.0177684	1		1.7032	1.66767
PG6217	Q9R1T2;Q9R1T2-2	SUMO-activating enzyme subunit 1;SUMO-activating enzyme subunit 1, N-terminally processed	Sae1	-0.200977	-0.0296289	0.268913	0.00354934	1298	-1.0098	0.126817	0.00419308	0.0177684	1	-1.13958	-0.848255	-1.04156
PG4499	Q80VP1;Q80VP1-2	Epsin-1	Epn1	1.37419	-0.954406			1299	-1.95817	0.040516	0.00419353	0.0177684	1		-2.22801	-1.68834
PG5420	Q922J9;Q922J9-4;Q922J9-3;Q922J9-2	Fatty acyl-CoA reductase 1	Far1	-0.0816208	0.566713	0.0766011	0.721065	1300	1.33448	0.76181	0.00420605	0.0177906	1	0.919782	1.28826	1.7954
PG1727	F8VQ93;Q8VDD9	PH-interacting protein	Phip	-0.196625	-0.572249	0.306716	-0.658516	1301	1.26945	0.744004	0.0042099	0.0177906	1	1.46266	1.5298	0.815885
PG5759	Q9CZ57;Q9CZ57-2	5-methylcytosine rRNA methyltransferase NSUN4	Nsun4	1.57176	0.840065			1302	2.12799	0.912609	0.00421006	0.0177906	1	1.77557		2.48041
PG6055	Q9ER38	Torsin-3A	Tor3a	1.62312	-0.0438042			1303	1.93963	0.887536	0.0042139	0.0177906	1	2.2011		1.67815
PG4819	Q8C0W5;Q8CI75;Q8CI75-2	DIS3-like exonuclease 2	Dis3l2	-0.473351	-0.308415	0.621847	-0.314266	1304	1.2581	0.741824	0.00421492	0.0177906	1	1.13929	1.6898	0.945214
PG5853	Q9D2Q3;A0A140LJK0;A0A140LJB8	Uncharacterized protein C10orf88 homolog		-0.034768	0.190801	0.049549	0.258837	1305	-1.0256	0.124455	0.0042184	0.0177916	1	-1.19179	-1.03839	-0.84661
PG2382	P23116;Q6A0B9;Q3UL99;Q3TKF9;Q3UM46;Q3UEK3	Eukaryotic translation initiation factor 3 subunit A	Eif3a	-0.282844	-0.128166	0.376165	-0.109954	1306	1.05679	0.689499	0.00424202	0.0178776	1	0.939013	1.30231	0.929041
PG2657	P54731	FAS-associated factor 1	Faf1	-0.290563	1.12845	0.285754	1.42309	1307	2.04224	0.90189	0.0042471	0.0178853	1	1.17779	2.05706	2.89187
PG1546	E9Q784		Zc3h13	0.0422158	0.0820901	-0.0353151	0.120004	1308	0.978312	0.666424	0.00425201	0.0178922	1	0.919782	0.924505	1.09065
PG3454	Q3TXU5;F6W7I2	Deoxyhypusine synthase	Dhps	0.0259085	-0.459535	0.0274995	-0.539168	1309	1.13192	0.712028	0.00425675	0.0178985	1	1.38414	1.19323	0.818383
PG4352	Q6PIP5;Q8BJK0	NudC domain-containing protein 1	Nudcd1	0.0279651	-0.185876	0.00327098	-0.205614	1310	-0.977124	0.131359	0.00426261	0.0179095	1	-0.885404	-0.969035	-1.07693
PG5036	Q8K212;Q3TAB8;Q3TP27	Phosphofurin acidic cluster sorting protein 1	Pacs1	-0.0526406	-0.0912408	0.0936515	-0.0836521	1311	0.961568	0.661882	0.00426864	0.0179126	1	0.951896	1.01622	0.916592
PG3804	Q3UTR5;Q922W5;A2ABZ2;A2ABZ3	Pyrroline-5-carboxylate reductase;Pyrroline-5-carboxylate reductase 1, mitochondrial	Pycr1	-2.20429	1.02989			1312	2.82935	0.968568	0.00426986	0.0179126	1		3.44854	2.21016
PG1146	D3YTR6;Q8R0G7	Protein spinster homolog 1	Spns1	0.456718	1.24969			1313	-1.67907	0.0563227	0.00430041	0.0180181	1	-1.63371	-1.72443
PG2117	Q9CZS7;Q544E3;O70172;F6RJE8	Phosphatidylinositol 5-phosphate 4-kinase type-2 alpha	Pip4k2a	-0.217148	-1.47392			1314	1.74147	0.850836	0.00430156	0.0180181	1	1.87525	1.60769
PG0177	A0A0N4SUW7;A0A0N4SV16;Q9CZ52-2;Q9CZ52	Anthrax toxin receptor 1	Antxr1	0.444666	-0.645369	-0.466323	-0.799854	1315	-1.45001	0.0743096	0.00432343	0.0180959	1	-0.851689	-1.68822	-1.81012
PG1413	Q9CQ09;Q5U470;E9PWZ3	Ribosomal protein L3-like	Rpl3l	3.51225	0.792696			1316	-4.44004	0.000181686	0.0043276	0.0180996	1		-4.44004
PG4588	Q8BGQ7;Q6XMP4;Q3UD67;Q3TZ32;Q6PDM7;Q8R346	Alanine--tRNA ligase, cytoplasmic	Aars	-0.213669	0.112311	0.273057	0.177674	1317	1.03494	0.681868	0.00433981	0.0181369	1	0.814149	1.17987	1.1108
PG2736	P60335	Poly(rC)-binding protein 1	Pcbp1	-0.0391318	-0.0159934	0.0712699	0.00701142	1318	0.954643	0.659702	0.00435477	0.0181856	1	0.908145	0.984315	0.97147
PG4916	Q8CD15;D3YTU3	Bifunctional lysine-specific demethylase and histidyl-hydroxylase MINA	Mina	-0.821538	-0.427474	1.05417	-0.43113	1319	1.65119	0.831577	0.00435873	0.0181884	1	1.40622	2.38351	1.16386
PG4001	Q5EBG8	Uncharacterized protein C1orf50 homolog		-1.30602	0.835003			1320	1.89625	0.878634	0.00436841	0.0181899	1		2.14556	1.64694
PG0825	B1AXP6;B1AXP6-2;B1AXP6-3;B1AXP6-4	Mitochondrial import receptor subunit TOM5 homolog	Tomm5	-1.50162	0.211017	1.82943	0.402819	1321	2.46479	0.944404	0.00436894	0.0181899	1	1.45884	3.62008	2.31546
PG2332	Q3TE85;Q566K0;P17095;Q3TVP0;P17095-1	High mobility group protein HMG-I/HMG-Y	Hmga1;mCG_120563	1.01524	-0.497349	-1.17104	-0.665763	1322	1.89267	0.877725	0.00436901	0.0181899	1	2.72556	1.17072	1.78174
PG2226	P05132;P05132-2	cAMP-dependent protein kinase catalytic subunit alpha	Prkaca	-0.433178	-1.60259	0.675826	-1.89575	1323	2.55532	0.950945	0.00438305	0.0182282	1	3.22368	3.19888	1.24341
PG5790	Q9D071-3;Q9D071;Q9D071-2;F7C9N6	MMS19 nucleotide excision repair protein homolog	Mms19	-0.320738	0.209151	0.395402	0.304478	1324	1.13286	0.712209	0.00438483	0.0182282	1	0.794443	1.34508	1.25907
PG5748	Q9CYI0;J3KMQ6;A0PJK9;Q3TUY5	Protein Njmu-R1	5730455P16Rik	-0.0382483	-0.130139	0.079261	-0.132259	1325	0.957922	0.661156	0.00439521	0.0182575	1	0.979351	1.0084	0.886011
PG2231	P05480;F8WI90;Q3UKD6	Neuronal proto-oncogene tyrosine-protein kinase Src;Non-specific protein-tyrosine kinase	Src	-0.0373354	-0.117867	0.0771777	-0.117367	1326	0.953951	0.658975	0.00442891	0.0183725	1	0.968646	1.00139	0.891818
PG0164	A0A0J9YUR2;A0A0J9YV86;A0A0J9YTU3;Q5SXY1-3;A0A0J9YUF8;Q5SXY1-2;Q5SXY1;Q3UPB2	Cytospin-B	Specc1	0.444798	-0.274106	-0.495964	-0.347119	1327	-1.19363	0.105015	0.00442957	0.0183725	1	-0.814549	-1.50192	-1.26442
PG2779	P62071;Q9CTF6;A0A1B0GRT5	Ras-related protein R-Ras2	Rras2	0.141212	-0.177335	-0.134946	-0.204412	1328	0.984646	0.667878	0.00443661	0.0183798	1	1.13523	0.90065	0.918055
PG3307	Q3TJA9;Q99M87-2;Q99M87;Q99M87-3	DnaJ homolog subfamily A member 3, mitochondrial	Dnaja3	0.178049	0.135127	-0.204495	0.173631	1329	1.01716	0.677144	0.00443799	0.0183798	1	1.00396	0.844841	1.20269
PG4762	Q8BVE8;Q8BVE8-2;D3Z3E4;B2RY48;D3Z3E0;Q8BVE8-3	Histone-lysine N-methyltransferase NSD2	Whsc1	-1.09314	0.8435			1330	1.72357	0.847202	0.00445898	0.0184528	1		1.85877	1.58838
PG1550	E9Q7E2		Arid2	-0.158629	0.273737	0.193392	0.370052	1331	-1.085	0.118641	0.0044725	0.0184829	1	-1.37009	-1.01448	-0.870444
PG1695	Q3TI34;Q5XJZ8;Q76LV0;F7A8H6;O70325-2;O70325;Q91XR9;S4R1E5;Q8K4U7;Q3TIF2	Glutathione peroxidase;Phospholipid hydroperoxide glutathione peroxidase, mitochondrial;Phospholipid hydroperoxide glutathione peroxidase, nuclear	Gpx4;PHGPx	0.586258	1.20631	-0.785324	1.4467	1332	2.23818	0.925872	0.00447298	0.0184829	1	1.82258	1.53782	3.35415
PG4809	Q8C0D5	Elongation factor Tu GTP-binding domain-containing protein 1	Eftud1	-0.421679	0.0840283	0.527929	0.160106	1333	1.15248	0.718205	0.00449018	0.0185401	1	0.831006	1.46892	1.15751
PG1183	D3YW19;I1E4X5;Q8BWQ6;D3YW20;Q8BWQ6-3;Q8BWQ6-2	UPF0505 protein C16orf62 homolog	9030624J02Rik	0.987873	0.140485	-1.18845	0.114286	1334	1.75015	0.853016	0.00450279	0.0185782	1	2.1908	0.929829	2.12981
PG5487	Q99KP6;Q99KP6-2;Q99KP6-3	Pre-mRNA-processing factor 19	Prpf19	-0.193776	0.120062	0.248281	0.185508	1335	1.01879	0.677689	0.00450715	0.0185823	1	0.80465	1.14637	1.10536
PG2272	Q920X9;Q920X8;Q91VD3;Q91VC2;Q91V69;Q4FJP7;Q3UE54;Q3U6A3;P10810;Q920X7;Q3UB18	Monocyte differentiation antigen CD14	CD14;Cd14	-0.236295	-1.42762			1336	1.69409	0.841933	0.00451734	0.0186104	1	1.80551	1.58267
PG0922	B2RUJ2;B7ZNY4;B7ZNX6;B2RUK2;Q80TH2-1;Q80TH2;Q80TH2-2	Protein LAP2	Erbb2ip	-0.410881	-0.410949	0.554121	-0.444385	1337	-1.23992	0.099564	0.00453638	0.0186671	1	-1.2629	-0.838799	-1.61805
PG3655	Q3UF75;Q9EPC1;Q8C5R4	Alpha-parvin	Parva	-0.381711	0.105	0.477723	0.182429	1338	1.12399	0.709847	0.00453789	0.0186671	1	0.812686	1.40455	1.15474
PG3261	Q3TH34;Q9D8N2	Protein FAM45A	Fam45a	0.321193	-1.22275	-0.270517	-1.49392	1339	2.00165	0.896257	0.00455547	0.0187254	1	2.87137	1.97093	1.16267
PG2212	Q99KF5;P00493	Hypoxanthine-guanine phosphoribosyltransferase	Hprt;Hprt1	-0.403978	0.0765051	0.507029	0.149491	1340	-1.13	0.113009	0.00459211	0.0188563	1	-1.43704	-0.82628	-1.12668
PG5767	Q9CZD3	Glycine--tRNA ligase	Gars	-0.106586	0.000117795	0.151913	0.032146	1341	0.955314	0.659884	0.0045947	0.0188563	1	0.861231	1.03584	0.968873
PG2615	Q8BGZ6;Q3UM38;Q3TLY5;P51569	Alpha-galactosidase A	Gla	-0.70304	0.059317	0.871603	0.15286	1342	-1.41003	0.0783067	0.0045976	0.0188563	1	-1.8757	-0.864149	-1.49025
PG5319	Q91WA1	TIMELESS-interacting protein	Tipin	-0.927093	0.885678	1.0781	1.17881	1343	2.1451	0.914608	0.00460754	0.018883	1	1.06484	2.71422	2.65624
PG5535	Q99MR1;A0A0G2JGR7	PERQ amino acid-rich with GYF domain-containing protein 1	Gigyf1	-0.225182	-1.42672			1344	1.68912	0.840661	0.00461713	0.0189069	1	1.80793	1.57031
PG2890	P70255-2;P70255-5;P70255-4;P70255;P70255-6	Nuclear factor 1 C-type	Nfic	-0.778315	1.38158			1345	1.93386	0.886628	0.00462024	0.0189069	1		1.64601	2.2217
PG2051	O35646;Q80VZ1	Calpain-6	Capn6	-0.404637	0.656637	0.461762	0.857001	1346	1.51393	0.802689	0.00462906	0.0189289	1	0.863822	1.70882	1.96915
PG3518	Q3U3C9-4;Q3U3C9-3;Q3U3C9;Q3U3C9-2	Genetic suppressor element 1	Gse1	-2.00108	-1.46225			1347	-2.80458	0.00981105	0.00463921	0.0189563	1	-2.16911		-3.44006
PG2567	P47930;P47930-2	Fos-related antigen 2	Fosl2	1.44703	-0.368868	-1.70565	-0.54421	1348	2.35156	0.935865	0.00464585	0.0189694	1	3.35223	1.26043	2.44203
PG4187	Q63844;D3Z3G6;A0A0U1RPX4;Q3U2H3;A0A0U1RPZ0;D3Z6D8	Mitogen-activated protein kinase 3;Mitogen-activated protein kinase	Mapk3	-0.0327614	0.631216	0.0121395	0.795749	1349	-1.36175	0.0853924	0.00465025	0.0189695	1	-1.78698	-1.45917	-0.83911
PG2945	P83877;F8WGE7;Q78JM7	Thioredoxin-like protein 4A	Txnl4a	0.0111442	0.589348	-0.0378589	0.74112	1350	1.317	0.757812	0.00465276	0.0189695	1	0.941283	1.1924	1.81731
PG2863	P63242;A0A0A0MQM0	Eukaryotic translation initiation factor 5A-1;Eukaryotic translation initiation factor 5A	Eif5a	0.044685	-0.37557	-0.00197209	-0.438302	1351	-1.04675	0.121548	0.00466877	0.0190089	1	-0.833532	-1.01626	-1.29045
PG4340	Q6PFQ7;Q6PFQ7-2	Ras GTPase-activating protein 4	Rasa4	-1.53652	0.837416			1352	2.09352	0.90734	0.00466934	0.0190089	1		2.46078	1.72626
PG3463	Q3TYX3	SET and MYND domain-containing protein 5	Smyd5	0.300236	0.29181	-0.365333	0.354762	1353	1.1406	0.71439	0.00468467	0.0190487	1	1.1038	0.841124	1.47688
PG4943	Q8CG72;Q8CG72-2	Poly(ADP-ribose) glycohydrolase ARH3	Adprhl2	0.236883	0.305269	-0.28946	0.37633	1354	1.11787	0.708031	0.00468603	0.0190487	1	1.03736	0.866468	1.44977
PG4927	Q8CEJ2;Q9WTZ0	Protein UXT	Uxt	1.19822	-0.914404			1355	-1.77377	0.0514172	0.00469371	0.019062	1		-1.97203	-1.5755
PG4611	Q8BH95	Enoyl-CoA hydratase, mitochondrial	Echs1	0.310405	-0.510067	-0.314008	-0.623934	1356	-1.22709	0.101199	0.00469705	0.019062	1	-0.784467	-1.38354	-1.51327
PG3986	Q571B0;Q9ET30;Q8C6F5;Q3UH23	Transmembrane 9 superfamily member 3	Tm9sf3	-0.356122	-0.169052	0.468407	-0.153853	1357	1.08535	0.69931	0.0046997	0.019062	1	0.950378	1.39713	0.908559
PG1844	G3X9X1;Q6ZPP6;Q8BSY6;Q8R1W9		Kbtbd2	-1.29829	0.809406			1358	1.86703	0.872456	0.00470907	0.0190776	1		2.12473	1.60932
PG3559	Q3U5F9;Q9JJA2;Q3U184	Conserved oligomeric Golgi complex subunit 8	Cog8	0.329675	-0.0803658	-0.371533	-0.101492	1359	1.04521	0.686592	0.00471048	0.0190776	1	1.24487	0.792366	1.09838
PG2954	Q3UDZ1;P84096	Rho-related GTP-binding protein RhoG	Rhog	-0.67318	-0.373352	0.869696	-0.377198	1360	-1.43611	0.0759448	0.00472689	0.01913	1	-1.62934	-0.832527	-1.84647
PG2015	O35218;Q3UGU6;Q3US33;Q3URN8	Cleavage and polyadenylation specificity factor subunit 2	Cpsf2	0.158499	0.0762436	-0.176076	0.103415	1361	0.972635	0.664971	0.00476423	0.019267	1	0.983183	0.82703	1.10769
PG3984	Q56A08	G patch domain and KOW motifs-containing protein	Gpkow	-0.286216	0.322218	0.344496	0.439552	1362	-1.1543	0.109193	0.00476987	0.0192674	1	-1.54003	-0.990984	-0.931892
PG0227	A0A0R4J091;Q9JKP7;D6RDT4	DNA polymerase epsilon subunit 3	Pole3	-0.00137061	-0.160778	0.0369061	-0.172622	1363	0.942078	0.655887	0.00477318	0.0192674	1	1.00242	0.968873	0.854943
PG5731	Q9CXX9;Q9CVB0	CUE domain-containing protein 2	Cuedc2	1.22087	0.595199	-1.50753	0.649844	1364	2.20023	0.92133	0.00477484	0.0192674	1	2.50377	1.10806	2.98887
PG0657	A2VCP7;A2AU35;Q8BHL8	Proteasome inhibitor PI31 subunit	Psmf1	0.445089	1.20652			1365	-1.62453	0.0612282	0.0047841	0.0192835	1	-1.57841	-1.67064
PG3309	Q3TJC2;Q61205;D3Z7E6;D3Z2X5	Platelet-activating factor acetylhydrolase IB subunit gamma	Pafah1b3	0.603673	0.126979	-0.720767	0.12907	1366	-1.29592	0.09375	0.00478585	0.0192835	1	-1.0641	-1.80674	-1.0169
PG0478	A1A4T2;Q8BHN3;Q8BHN3-2;Q3UE86;Q8BHN3-3	Neutral alpha-glucosidase AB	Ganab	-0.281106	-0.00978058	0.364653	0.0342724	1367	1.01883	0.677871	0.00479604	0.0193105	1	0.832108	1.24065	0.983744
PG4062	Q5SW15;Q9CQG2;Q9CQG2-2	Methyltransferase-like protein;Methyltransferase-like protein 16	Mettl16	-1.45666	-0.106247			1368	-1.76875	0.0515988	0.0048026	0.0193227	1	-1.97233		-1.56517
PG1026	Q3U0J1;B9EJX8;Q9D0W5	Peptidyl-prolyl cis-trans isomerase;Peptidyl-prolyl cis-trans isomerase-like 1	Ppil1	-0.237268	-1.11096	0.398854	-1.31215	1369	1.81631	0.863009	0.00480883	0.0193337	1	2.30481	2.21068	0.933444
PG5988	Q9DC28;Q3UBT6;Q3USK2;Q9DC28-2;F7A4U8;Q3TYE1	Casein kinase I isoform delta	Csnk1d;Csnk1e	-0.0461762	-0.225222	0.0964396	-0.247565	1370	0.962676	0.662246	0.00481601	0.0193484	1	1.0358	1.03741	0.814815
PG0675	Q52KF7;A2BEE9;Q80TH1;P70175;A2BEF2	Disks large homolog 3	Dlg3	-0.988182	-1.54369			1371	2.0943	0.907522	0.00483608	0.0194149	1	1.71655	2.47205
PG1871	G5E8L8;Q61083	Mitogen-activated protein kinase kinase kinase 2	Map3k2	0.0360772	0.385365	-0.0519422	0.49034	1372	1.11721	0.707304	0.00485408	0.0194711	1	0.87606	1.01114	1.46442
PG5340	Q91X43-2;Q91X43	SH3 domain-containing protein 19	Sh3d19	-0.184028	-0.282735	0.268427	-0.306487	1373	-1.01992	0.125545	0.00486033	0.0194711	1	-0.990616	-0.824204	-1.24493
PG5745	Q9CYD3	Cartilage-associated protein	Crtap	0.480101	-0.386209	-0.529938	-0.486697	1374	-1.24661	0.0984738	0.0048607	0.0194711	1	-0.781389	-1.56198	-1.39647
PG2104	Q7TMG8;Q3TD78;O55126	Protein NipSnap homolog 2	Gbas	-0.837578	1.98165			1375	2.51573	0.948401	0.00487265	0.0195024	1		1.96817	3.0633
PG3782	Q3URE1;A0A1D5RMC8	Acyl-CoA synthetase family member 3, mitochondrial	Acsf3	-0.0721218	-0.385495	0.140677	-0.440903	1376	-1.04629	0.12173	0.00487561	0.0195024	1	-0.893129	-0.920607	-1.32512
PG4627	Q8BHS3	Pre-mRNA-splicing factor RBM22	Rbm22	0.0202489	-0.0328707	0.000492534	-0.0184007	1377	0.923927	0.651344	0.00488301	0.0195179	1	0.92091	0.90934	0.941532
PG2125	Q4FK50;O70281;D3Z1F4	Protein-tyrosine sulfotransferase 1	Tpst1	1.04822	-0.925218			1378	-1.65638	0.059048	0.00488874	0.019522	1		-1.7719	-1.54085
PG2150	O88271	Craniofacial development protein 1	Cfdp1	0.215286	1.04957	-0.322334	1.28575	1379	1.84916	0.867914	0.00489113	0.019522	1	1.31679	1.47472	2.75598
PG3974	Q548M4;Q9JLJ5;Q4V9V3	Elongation of very long chain fatty acids protein;Elongation of very long chain fatty acids protein 1	Elovl1	0.110012	-0.616851	-0.0621517	-0.737853	1380	1.23406	0.7371	0.00492254	0.019612	1	1.62667	1.25784	0.81767
PG3828	Q3UXU8;Q8K2X3	CST complex subunit STN1	Obfc1	-0.0521377	-0.987776	0.164233	-1.177	1381	1.62548	0.82649	0.00492375	0.019612	1	2.1457	1.84872	0.882024
PG4956	Q8CHK3;F6UP63	Lysophospholipid acyltransferase 7	Mboat7	-0.329916	-0.647259	0.474554	-0.739146	1382	-1.34429	0.0888445	0.00492437	0.019612	1	-1.18199	-0.963317	-1.88757
PG4703	Q8BND3-2;Q8BND3;Q69ZL7	WD repeat-containing protein 35	Wdr35	0.544332	-0.169769	-0.625134	-0.227979	1383	1.2153	0.734012	0.00493662	0.0196465	1	1.58892	0.80782	1.24916
PG1374	E9PUN5;Q8C3W2;Q8BSP6;Q3TZP9;Q9Z138;Q8K0Q8	Tyrosine-protein kinase transmembrane receptor;Tyrosine-protein kinase transmembrane receptor ROR2	Ror2	-0.271633	-0.710974	0.408829	-0.821586	1384	1.37484	0.771076	0.00495214	0.0196941	1	1.60767	1.72127	0.79559
PG5452	Q99JB2;A2AG39;F6WI02	Stomatin-like protein 2, mitochondrial	Stoml2	0.450531	-0.182196	-0.510226	-0.235503	1385	-1.13421	0.112464	0.00497875	0.0197856	1	-0.80619	-1.46441	-1.13204
PG3167	Q3UVN0;Q3T9L0;Q8VDW0;Q3U837;Q3TPL7;Q3TIE4;Q3UAF1	ATP-dependent RNA helicase DDX39A	Ddx39;Ddx39a	0.0880259	-0.392442	-0.0532695	-0.462403	1386	1.04547	0.686955	0.00498359	0.0197875	1	1.29311	1.04452	0.798789
PG4178	Q62384;Q3TI08;Q9JJA1;Q3TY03;Q3TIH8;Q8C8U3;F8WHU9	Zinc finger protein ZPR1	Zpr1	0.29476	-0.178944	-0.321301	-0.218865	1387	1.02378	0.679142	0.00498642	0.0197875	1	1.26197	0.817414	0.991951
PG1492	E9Q3E2;Q8CC35;Q3TY32	Synaptopodin	Synpo	-0.0464141	0.728663	0.0209826	0.915694	1388	-1.43983	0.0753997	0.00501849	0.0199004	1	-1.93033	-1.54471	-0.844463
PG0799	M0QW74;Q66I45;B1ATD5;B1ATD4;R4GML8;Q8K296-2;Q8K296;Q80U24;Q8R0N4	Myotubularin-related protein 3	Mtmr3	0.0201509	0.459403	-0.0384789	0.581923	1389	-1.16835	0.108103	0.00503212	0.0199401	1	-1.46222	-1.27565	-0.767181
PG4372	Q8C7P1;Q6ZPT1;Q497T4;Q80TF4-5;Q80TF4-3;Q80TF4-4;Q80TF4-2;Q80TF4	Kelch-like protein 9;Kelch-like protein 13	Klhl9;Klhl13	0.185399	0.252654	-0.222754	0.316354	1390	1.04407	0.686047	0.0050435	0.0199708	1	0.965594	0.843725	1.3229
PG1161	D3YUE7;Q5U4C7;Q8CB44;D6RET7	GRAM domain-containing protein 4	Gramd4	0.355199	0.343781	-0.436212	0.413669	1391	1.18392	0.726381	0.00504728	0.0199714	1	1.14743	0.830734	1.57359
PG4331	Q6PDI5;Q6PDI5-2;A2ALV7	Proteasome-associated protein ECM29 homolog	Ecm29;AI314180	-0.0767912	-0.115688	0.124924	-0.1115	1392	0.927514	0.652616	0.00505164	0.0199743	1	0.918654	1.00606	0.857823
PG0668	A2AWS5;B7ZDF7;Q6P9T4;Q3UJF1;Q3U2E0;B7ZDF5;Q9Z2V6;B7ZDF6;B7ZDF4	Histone deacetylase;Histone deacetylase 5	Hdac5	1.29882	0.153403			1393	1.60676	0.823946	0.00507734	0.0200615	1	1.67968		1.53384
PG1230	D3YZR1;Q9JHE7;D3Z6S3;D3YYU6	Protein TSSC4	Tssc4	0.593481	-0.343587	-0.671023	-0.443945	1394	-1.30814	0.0919331	0.00508163	0.0200641	1	-0.804108	-1.72212	-1.39819
PG5784	Q9CZX0-2;Q9CZX0	Elongator complex protein 3	Elp3	0.41837	0.0572351	-0.490179	0.0590938	1395	1.0974	0.702217	0.00509483	0.0201018	1	1.26584	0.747765	1.27861
PG4968	Q8CI11;Q3TK27;Q8CI11-2	Guanine nucleotide-binding protein-like 3	Gnl3	0.123365	-0.110504	-0.118577	-0.121461	1396	0.93164	0.653525	0.00510778	0.0201384	1	1.03268	0.849305	0.912939
PG5681	Q9CSH3	Exosome complex exonuclease RRP44	Dis3	-0.515699	-0.568908	0.693964	-0.628485	1397	-1.38626	0.0821221	0.00512042	0.0201618	1	-1.37509	-0.871624	-1.91206
PG3750	Q3UMB9	WASH complex subunit 7	Kiaa1033	0.120563	-0.194444	-0.108508	-0.223596	1398	0.948356	0.657703	0.00512106	0.0201618	1	1.0974	0.884083	0.86359
PG4935	Q8CFI2	Ubiquitin-conjugating enzyme E2 R1	Cdc34	1.26333	0.221257			1399	1.58342	0.819949	0.00512558	0.0201618	1	1.60401		1.56282
PG3325	Q3TKQ3;Q8VBV3;A2AV19	Exosome complex component RRP4	Exosc2	0.156951	-0.068162	-0.16273	-0.0725585	1400	-0.937026	0.138263	0.00512837	0.0201618	1	-0.842048	-1.05418	-0.914856
PG4498	Q80VD1	Protein FAM98B	Fam98b	-0.129294	0.427402	0.145563	0.555056	1401	1.15011	0.717115	0.00515041	0.020234	1	0.790803	1.16823	1.49129
PG3504	Q3U2G6;Q9JJZ6	Krueppel-like factor 13	Klf13	-0.908914	0.860687			1402	1.58285	0.819767	0.0051544	0.0202353	1		1.61454	1.55117
PG2114	O55242;I4DCY6;B7ZJH7;A2AMS0;B7ZJH6;O55242-2	Sigma non-opioid intracellular receptor 1	Sigmar1	0.420462	0.0488603	-0.492054	0.0487108	1403	1.09386	0.70149	0.00515943	0.0202405	1	1.26842	0.744127	1.26902
PG3932	Q52L50;Q99JI6	Ras-related protein Rap-1b	Rap1b	-0.234965	-0.461183	0.344461	-0.519956	1404	1.13125	0.711846	0.00516827	0.0202608	1	1.23722	1.4013	0.755243
PG0659	A2AU91;P70399;A2AU89;P70399-3;P70399-2;Q8C0U1;Q3V1P7	Tumor suppressor p53-binding protein 1	Trp53bp1;Tp53bp1	0.441492	-0.0355673	-0.510892	-0.0559575	1405	-1.09987	0.116461	0.00518926	0.0203286	1	-0.863561	-1.45048	-0.985552
PG1220	D3YYW8;Q91V81-2;Q91V81	RNA-binding protein 42	Rbm42	0.243749	-2.46492			1406	2.73761	0.962209	0.00521237	0.0204046	1	3.38486	2.09037
PG3433	Q3UJW8;Q3TWE8;Q9CZT4-2;Q9CZT4	DNA-directed RNA polymerase III subunit RPC5	Polr3e	-0.603611	-0.120046	0.76509	-0.073958	1407	-1.25644	0.0975654	0.00524917	0.0205341	1	-1.56003	-0.75618	-1.4531
PG1036	B9EKK3;Q3UQ44;Q8C9I3	Ras GTPase-activating-like protein IQGAP2	Iqgap2	-3.22406	-0.828916			1408	4.0911	0.99891	0.00525327	0.0205355	1		4.0911
PG0082	Q921M8;A0A0A6YW28;Q3TEX8;P35123;Q6NXV6;A0A0A6YVY7;Q5DTK8;Q3TPN5	Ubiquitin carboxyl-terminal hydrolase;Ubiquitin carboxyl-terminal hydrolase 4	Usp4	-0.229538	-0.010793	0.302105	0.0288428	1409	0.966788	0.663336	0.00526832	0.0205797	1	0.809762	1.1476	0.943004
PG0692	Q8VCE7;A2RS96;Q9CXE7;Q3U9T7;Q3TW73;E9PXY3	Transmembrane emp24 domain-containing protein 5	Tmed5	-0.94797	-0.402737	1.20576	-0.390678	1410	1.6996	0.843387	0.005274	0.0205873	1	1.36866	2.52826	1.20188
PG0174	A0A0N4SUH8;Q9QZ23	NFU1 iron-sulfur cluster scaffold homolog, mitochondrial	Nfu1	0.211789	-0.00960478	-0.233979	-0.00561034	1411	0.951891	0.658794	0.00528905	0.0206229	1	1.04323	0.779894	1.03255
PG2011	O35134;Q3UHI3;Q8BNM6;Q3TUG2;Q3TU49;Q80Y46;Q05DK4;Q05BP7;Q8C2X2	DNA-directed RNA polymerase I subunit RPA1;DNA-directed RNA polymerase	Polr1a	-0.221131	-0.640122	0.341868	-0.739293	1412	1.26533	0.743278	0.00529742	0.0206229	1	1.4848	1.55805	0.753128
PG4818	Q8C0V9-2;Q8C0V9;Q8C0V9-3	FERM domain-containing protein 6	Frmd6	1.39305	0.0213919			1413	1.68235	0.838118	0.00529776	0.0206229	1	1.86124		1.50347
PG4368	Q6ZPJ3	E2/E3 hybrid ubiquitin-protein ligase UBE2O	Ube2o	0.0898786	-0.25655	-0.0663106	-0.296837	1414	-0.955962	0.134084	0.0053	0.0206229	1	-0.787551	-0.984014	-1.09632
PG5511	Q99LI5	Zinc finger protein 281	Znf281	-1.42183	-0.886641			1415	-1.94768	0.0408794	0.00530185	0.0206229	1	-1.61097		-2.28439
PG2005	O35075	Down syndrome critical region protein 3 homolog	Dscr3	-0.145171	0.421832	0.165287	0.549555	1416	1.14052	0.714208	0.00531001	0.0206255	1	0.775548	1.17238	1.47364
PG0486	A1ILG8;Q8BX70-3;Q8BX70;Q8BX70-2	Vacuolar protein sorting-associated protein 13C	Vps13c	0.634792	0.0759328	-0.754507	0.0642891	1417	1.27966	0.747638	0.00531003	0.0206255	1	1.55918	0.753591	1.52619
PG5964	Q9DBE0	Cysteine sulfinic acid decarboxylase	Csad	-1.2187	-0.403826			1418	-1.56773	0.0652253	0.00533765	0.0207182	1	-1.52824		-1.60722
PG1353	E0CZ72;P28740;P28740-1;F8VQ42	Kinesin-like protein;Kinesin-like protein KIF2A	Kif2a	-0.154027	-0.328454	0.235622	-0.36468	1419	1.00743	0.674782	0.00534495	0.0207302	1	1.08067	1.18779	0.753833
PG3251	Q3TG12;Q9WUA2;Q9CZU5;Q8C644;Q3TI98;Q3UYC2;Q3TMX6	Phenylalanine--tRNA ligase beta subunit	Farsb	-0.103787	-0.0195938	0.150079	0.00788045	1420	0.916275	0.648983	0.00534828	0.0207302	1	0.835415	0.998279	0.91513
PG3178	Q3TAH3;Q9CPP0	Nucleoplasmin-3	Npm3	0.0238844	-0.223478	0.0112129	-0.251137	1421	0.93277	0.653706	0.00537067	0.0208024	1	1.0444	0.951207	0.802702
PG0256	A0A0R4J0M9;Q80T83;Q8CDG3;Q05DM9;Q8CDG3-2;Q3UMT4	Deubiquitinating protein VCIP135	Vcpip1	0.00411394	0.0636661	0.0124226	0.100636	1422	0.914134	0.648256	0.00539301	0.0208742	1	0.844984	0.89424	1.00318
PG2013	O35207;F2Z4B3	Cyclin-dependent kinase 2-associated protein 1	Cdk2ap1	-3.18181	-0.818746			1423	4.03759	0.998728	0.00541934	0.0209538	1		4.03759
PG4235	Q8C4D5;Q6A0D4;Q80VF9;D3Z731	Raftlin	Rftn1	0.796309	-1.98923			1424	-2.38593	0.0216206	0.00542118	0.0209538	1		-1.85644	-2.91541
PG4474	Q80TR8-3;Q80TR8-4;Q80TR8;Q80TR8-2	Protein VPRBP	Vprbp	-0.434379	-1.25831			1425	1.56589	0.815952	0.00543032	0.0209657	1	1.50823	1.62354
PG5515	Q99LL5;Q9CSK2	Periodic tryptophan protein 1 homolog	Pwp1	0.153492	-0.0336244	-0.161271	-0.0301592	1426	0.922085	0.650981	0.00543301	0.0209657	1	0.994709	0.80119	0.970357
PG1377	E9PUQ9;F7AC58;E2JF22;Q80XT7;Q6ZQF9;Q3UM62	Piezo-type mechanosensitive ion channel component;Piezo-type mechanosensitive ion channel component 1	Piezo1;mKIAA0233	-0.573235	0.123971	0.708822	0.221144	1427	-1.23666	0.0999273	0.0054357	0.0209657	1	-1.66726	-0.806665	-1.23605
PG3791	Q3URV1-2;Q3URV1	Protein broad-minded	Tbc1d32	3.18708	0.714417			1428	-4.02822	0.000545058	0.00544918	0.0209774	1		-4.02822
PG5170	Q8R502;Q3TNL3	Volume-regulated anion channel subunit LRRC8C	Lrrc8c	-0.517238	0.621387	0.601315	0.823175	1429	1.49019	0.798328	0.00544944	0.0209774	1	0.797357	1.78168	1.89153
PG1355	E0CZ81;Q8CIV8	Tubulin-specific chaperone E	Tbce	-0.310374	0.128021	0.389256	0.204699	1430	-1.03206	0.123728	0.00545323	0.0209774	1	-1.3167	-0.812833	-0.966636
PG2402	P26039;Q80TM2;Q3UHS6	Talin-1	Tln1	-0.301449	-0.336262	0.415285	-0.362209	1431	1.07177	0.695312	0.00545581	0.0209774	1	1.06642	1.37138	0.777502
PG5645	Q9CQX2;Q3TH64;Q3TN44	Cytochrome b5 type B	Cyb5b	0.243057	0.392921	-0.303919	0.482717	1432	-1.13861	0.111737	0.00545778	0.0209774	1	-1.26741	-1.41146	-0.736954
PG6114	Q9JJ94	Sjoegren syndrome nuclear autoantigen 1 homolog	Ssna1	-1.05954	0.774599			1433	1.63408	0.828307	0.00546217	0.0209796	1		1.78525	1.48291
PG5489	Q99KR3	Beta-lactamase-like protein 2	Lactb2	0.268779	0.212304	-0.320816	0.260366	1434	1.03559	0.682049	0.00548145	0.021039	1	1.028	0.776232	1.30254
PG3770	Q3UXF7;Q3UPD0;Q8BTY8-2;Q8BTY8	Sec1 family domain-containing protein 2	Scfd2	-0.0913537	-1.08254	0.219385	-1.28937	1435	1.69297	0.841025	0.00549996	0.0210953	1	2.24704	1.96541	0.866476
PG1642	E9QP46;Q6ZWQ0	Nesprin-2	Syne2	0.899392	-0.0294237	-1.0675	-0.0857159	1436	1.53723	0.807776	0.00552164	0.0211541	1	2.02832	0.819631	1.76374
PG2039	O35495;Q6NVF8;E9PVC7;O35495-2;O35495-3;Q8C411;Q8BN81;Q8BQ67;Q8BFX6	Cyclin-dependent kinase 14	Cdk14	-0.627324	-1.28624			1437	1.66642	0.835029	0.00552297	0.0211541	1	1.48287	1.84998
PG1213	D3YYK8;E9Q6X0;Q8R001-2;Q8R001	Microtubule-associated protein RP/EB family member 2	Mapre2	-0.230619	-0.00309932	0.302807	0.0383129	1438	0.955896	0.660247	0.00553115	0.0211707	1	0.793715	1.13612	0.937854
PG1002	B7ZWK9;Q3UHH1-2;Q3UHH1-3;Q3UHH1	Zinc finger SWIM domain-containing protein 8	Zswim8	0.324531	-0.352211	-0.343698	-0.432582	1439	1.08157	0.697493	0.00554428	0.0211932	1	1.43892	0.884083	0.921713
PG0797	B1AT82;Q9D0M1;Q8BK29	Phosphoribosyl pyrophosphate synthase-associated protein 1	Prpsap1	-0.0827324	-0.432276	0.157279	-0.497088	1440	-1.04488	0.122093	0.00554651	0.0211932	1	-0.870078	-0.901908	-1.36266
PG4651	Q8BJM7;A0A0R4J0L2	S-adenosyl-L-methionine-dependent tRNA 4-demethylwyosine synthase	Tyw1	1.22662	0.41482			1441	1.59415	0.822129	0.00554858	0.0211932	1	1.4761		1.7122
PG0967	B2RY27;Q8BYC6;Q3V3K3;A0A0R4J1T3	Serine/threonine-protein kinase TAO3	Taok3	-1.08998	-1.56324			1442	2.15298	0.915334	0.00556431	0.0212385	1	1.70977	2.59618
PG5049	Q8K2C9	Very-long-chain (3R)-3-hydroxyacyl-CoA dehydratase 3	Hacd3	-1.13452	-0.0468778	1.40407	0.0584589	1443	1.82506	0.863735	0.00558075	0.0212865	1	1.17862	2.73568	1.56088
PG5104	Q8R0F6;Q8R0F6-2	Integrin-linked kinase-associated serine/threonine phosphatase 2C	Ilkap	0.0743681	0.0821602	-0.0743694	0.117474	1444	-0.913808	0.142442	0.00562841	0.0214453	1	-0.954234	-0.993315	-0.793874
PG3704	Q3UID0;Q6PDG5-2;Q6PDG5	SWI/SNF complex subunit SMARCC2	Smarcc2	0.173953	-0.30939	-0.164223	-0.368114	1445	0.98591	0.668423	0.00564316	0.0214453	1	1.23298	0.90065	0.824099
PG1927	Q6GTY4;J3QJX3;Q5DTL8;Q9Z2G6-2;Q9Z2G6;Q3TT70;Q80YC0	Protein sel-1 homolog 1	Sel1l	0.430825	-0.364882	-0.471786	-0.456681	1446	1.15173	0.71766	0.00564566	0.0214453	1	1.57654	0.871706	1.00693
PG0672	A2BDX3	Adenylyltransferase and sulfurtransferase MOCS3;Molybdopterin-synthase adenylyltransferase;Molybdopterin-synthase sulfurtransferase	Mocs3	-0.285819	-0.149445	0.381468	-0.135661	1447	0.987032	0.668605	0.00564877	0.0214453	1	0.880148	1.23894	0.842005
PG4356	Q6R891;Q6R891-2	Neurabin-2	Ppp1r9b	0.315841	0.0818104	-0.367609	0.0974036	1448	-1.00477	0.126999	0.005651	0.0214453	1	-0.908711	-1.27712	-0.828463
PG3274	Q3THK3;Q8BVJ2	General transcription factor IIF subunit 1	Gtf2f1	0.422059	0.0162712	-0.491407	0.00883917	1449	1.06468	0.692587	0.00565234	0.0214453	1	1.2594	0.719818	1.21483
PG3449	Q3U8F7;Q3U3C2;Q3TXQ4;Q9Z0J0	Epididymal secretory protein E1	Npc2	-0.895886	2.52342			1450	3.04515	0.979651	0.00565253	0.0214453	1		2.26557	3.82473
PG0429	A0A1D5RLZ6;Q4KL41;Q9DCC8	Mitochondrial import receptor subunit TOM20 homolog	Tomm20	-0.20546	-0.633918	0.322344	-0.733002	1451	-1.23325	0.100472	0.00565356	0.0214453	1	-1.00859	-0.954217	-1.73694
PG1033	B9EKJ3;Q80TL7-2;Q80TL7	Protein MON2 homolog	Mon2	-0.542983	-0.0939322	0.689383	-0.0470447	1452	1.1724	0.72311	0.00567826	0.0215242	1	0.887593	1.6193	1.01031
PG3650	Q3UE37	Ubiquitin-conjugating enzyme E2 Z	Ube2z	0.200685	0.327476	-0.24726	0.406355	1453	-1.06377	0.119913	0.0056911	0.021558	1	-1.17782	-1.29043	-0.723048
PG0918	B2RUG6;P59764;Q8BMP2	Dedicator of cytokinesis protein 4	Dock4	-1.04896	-0.650648	1.3481	-0.684785	1454	1.90038	0.879906	0.005698	0.0215693	1	1.65889	2.85645	1.1858
PG4593	Q8BGT7;Q3TGV3	Survival of motor neuron-related-splicing factor 30	Smndc1	-1.10011	-0.333374	1.38503	-0.293716	1455	1.81423	0.862464	0.00571438	0.0216164	1	1.35646	2.75137	1.33488
PG2314	Q5M8R8;P14869;D3YVM5;S4R1N1	60S acidic ribosomal protein P0	Rplp0	0.397243	-0.0393311	-0.456852	-0.0569476	1456	-1.03862	0.123001	0.0057303	0.0216416	1	-0.825065	-1.35318	-0.93762
PG5713	Q9CX97	WD repeat-containing protein 55	Wdr55	0.280611	-0.449705	-0.282616	-0.547901	1457	1.10828	0.70476	0.00573081	0.0216416	1	1.49843	0.964255	0.862148
PG1767	F8WJI3;Q8R3Q6;E9Q4B5	Coiled-coil domain-containing protein 58	Ccdc58	0.776182	0.451164	-0.956021	0.510372	1458	1.54865	0.81141	0.00573283	0.0216416	1	1.68631	0.838895	2.12074
PG4088	Q60520;Q60520-1	Paired amphipathic helix protein Sin3a	Sin3a	-0.00110714	-0.051716	0.0279258	-0.0396448	1459	0.885201	0.639898	0.00575017	0.021679	1	0.881264	0.891228	0.883111
PG2716	Q3US32;Q5SPX8;P58802;Q8CI62;Q8K2U6	TBC1 domain family member 10A	Tbc1d10a	0.280795	0.395821	-0.349982	0.483182	1460	-1.14176	0.110828	0.0057506	0.021679	1	-1.25097	-1.44531	-0.728993
PG1414	E9PX30;Q8BPM2;Q05BG3;E9Q1T3;Q8BPM2-2	Mitogen-activated protein kinase kinase kinase kinase;Mitogen-activated protein kinase kinase kinase kinase 5	Map4k5	0.0878444	1.32295	-0.189265	1.62949	1461	2.08346	0.90625	0.00576313	0.0217113	1	1.31767	1.7593	3.1734
PG6162	Q9QXS1-2;Q9QXS1	Plectin	Plec	-0.616552	0.0809079	0.76485	0.172153	1462	1.24742	0.740189	0.00578097	0.0217636	1	0.817808	1.72013	1.20431
PG6091	Q9JHU4	Cytoplasmic dynein 1 heavy chain 1	Dync1h1	-0.427588	-0.0613237	0.546647	-0.0166668	1463	1.06812	0.693677	0.00578782	0.0217705	1	0.829171	1.41668	0.958502
PG2059	Q811L7;Q8C2Q7;O35737	Heterogeneous nuclear ribonucleoprotein H;Heterogeneous nuclear ribonucleoprotein H, N-terminally processed	Hnrnph1	0.0474165	0.102077	-0.0432184	0.143955	1464	-0.9096	0.142805	0.00579764	0.0217705	1	-0.977002	-0.971329	-0.780468
PG3939	Q542A1;Q61334	B-cell receptor-associated protein 29	Bcap29	2.22361	-0.412597			1465	2.55497	0.950763	0.00579834	0.0217705	1	3.16807		1.94186
PG5472	Q99K41;Q3USG5;Q3U254;Q3UUU0	EMILIN-1	Emilin1	1.34862	-0.845643			1466	-1.84016	0.0488735	0.00580188	0.0217705	1		-2.14941	-1.53091
PG4218	Q69ZP3;Q69ZP3-3;Q69ZP3-4	Probable hydrolase PNKD	Pnkd	0.338116	0.222197	-0.40581	0.26679	1467	1.06293	0.692224	0.00580258	0.0217705	1	1.08862	0.746309	1.35385
PG3456	Q3TXW9;Q62141;Q62141-1;Q3TN09;Q62141-2;Q62141-3	Paired amphipathic helix protein Sin3b	Sin3b	0.00950059	0.0936336	0.00350084	0.136743	1468	0.904549	0.645894	0.00581462	0.0218009	1	0.820737	0.874703	1.01821
PG3980	Q569X3;Q62241	U1 small nuclear ribonucleoprotein C	Snrpc	1.55745	0.988605			1469	2.15284	0.915153	0.00583106	0.0218476	1	1.69632		2.60936
PG5950	Q9DB20;Q3THG0;Q3TF25	ATP synthase subunit O, mitochondrial	Atp5o	0.23133	0.00504364	-0.258875	0.0106634	1470	0.937407	0.655342	0.0058486	0.0218984	1	1.03112	0.747037	1.03407
PG2243	Q80Y52;P07901;Q3UIF3;Q3TKA2;Q3TJU7;A0PJ91;Q3TKB9;Q3TKG0;Q8C5U3	Heat shock protein HSP 90-alpha	Hsp90aa1	0.0825961	0.072465	-0.0835924	0.104982	1471	0.903145	0.645167	0.00585555	0.0219018	1	0.873089	0.818892	1.01745
PG0526	A2A7A7;Q8CFX1	GDH/6PGL endoplasmic bifunctional protein;Glucose 1-dehydrogenase;6-phosphogluconolactonase	H6pd	-0.159561	0.447278	0.180743	0.581756	1472	-1.13621	0.1121	0.00585747	0.0219018	1	-1.52434	-1.09765	-0.786641
PG6291	Q9Z2E1	Methyl-CpG-binding domain protein 2	Mbd2	0.139382	-0.374324	-0.11708	-0.444486	1473	1.00121	0.672783	0.005874	0.0219369	1	1.26713	0.955806	0.780689
PG4289	Q6P5B5;Q9WVR4	Fragile X mental retardation syndrome-related protein 2	Fxr2	0.148713	-0.16608	-0.144948	-0.191297	1474	-0.915277	0.141533	0.00587483	0.0219369	1	-0.767106	-1.00739	-0.971339
PG6131	Q9JKB1;B2RTM4;P58321	Ubiquitin carboxyl-terminal hydrolase isozyme L3;Ubiquitin carboxyl-terminal hydrolase;Ubiquitin carboxyl-terminal hydrolase isozyme L4	Uchl3;Uchl4	-0.0226335	0.396047	0.0185135	0.508142	1475	-1.06977	0.119549	0.00591346	0.0220662	1	-1.35036	-1.13095	-0.728
PG0599	A2AKV7;A2AKV6;Q8K1E6	Alpha-ketoglutarate-dependent dioxygenase alkB homolog 3	Alkbh3	0.605974	0.746906	-0.772789	0.884869	1476	1.62081	0.825763	0.00593468	0.0221112	1	1.48771	0.991289	2.38342
PG5131	Q8R2S9	Actin-related protein 8	Actr8	-3.0612	-0.789711			1477	3.88484	0.998183	0.00593615	0.0221112	1		3.88484
PG6115	Q9JJC6	RILP-like protein 1	Rilpl1	-0.454921	-0.396444	0.606455	-0.423114	1478	-1.17984	0.10665	0.00593757	0.0221112	1	-1.23625	-0.746269	-1.557
PG1653	F2Z3X0;Q9R1S8	Calpain-7	Capn7	-0.0808078	-0.244203	0.140007	-0.267894	1479	-0.922943	0.140443	0.00596195	0.022187	1	-0.858153	-0.816958	-1.09372
PG3923	Q505D1	Serine/threonine-protein phosphatase 6 regulatory ankyrin repeat subunit A	Ankrd28	0.579874	0.846424	-0.748993	1.00835	1480	1.69336	0.841388	0.0059899	0.0222759	1	1.48674	1.06593	2.52739
PG2978	Q3U6X7;Q3UGB9;Q3U307;P97377-2;P97377	Cyclin-dependent kinase 2	Cdk2	0.116945	-0.200683	-0.103619	-0.23091	1481	0.911002	0.647529	0.0060055	0.0223189	1	1.06169	0.850795	0.820526
PG3227	Q3TE95;Q8BP92	Reticulocalbin-2	Rcn2	0.429527	0.537954	-0.541902	0.644411	1482	-1.31545	0.0912064	0.0060679	0.0225356	1	-1.42469	-1.76461	-0.757039
PG0973	B6ZHD0;O70318;Q80UE3;Q3UNQ6;Q80UE5;Q80UE4;B6ZHC7;B6ZHC5;Q811B2;B6ZHC6;Q8C928;Q8CGJ6	Band 4.1-like protein 2	Epb4.1l2;Epb41l2	-0.387351	0.0441853	0.489401	0.108725	1483	1.0324	0.681323	0.00608609	0.0225728	1	0.75384	1.32893	1.01444
PG2982	Q91UZ6;Q8R067;Q8BU01;Q3TTS2;P97406		D17H6S56E-5	0.173031	-0.0691314	-0.182181	-0.0750487	1484	0.901654	0.644622	0.00608612	0.0225728	1	1.00628	0.771842	0.926841
PG1908	K4DI66;H7BX94;Q9Z2Q2-2;Q9Z2Q2;D3Z5V3;F6ZLH4;Q9Z2Q2-3	Lysine-rich nucleolar protein 1	Knop1	0.393435	1.11595			1485	-1.5005	0.0697674	0.00610346	0.0226219	1	-1.47138	-1.52961
PG1764	F8WJE3;Q8BQR4-2;Q8BQR4	KAT8 regulatory NSL complex subunit 2	Kansl2	0.620485	1.13909			1486	-1.60743	0.0615916	0.00612964	0.0227036	1	-1.4282	-1.78666
PG3723	Q3UKS4;Q3UJX2;Q9CWL8	Beta-catenin-like protein 1	Ctnnbl1	0.0203901	-0.272367	0.0193389	-0.310472	1487	0.919997	0.650436	0.00613913	0.0227156	1	1.05854	0.950441	0.751013
PG0212	A0A0R4J034;Q99K01-2;Q99K01;Q99K01-4;Q99K01-3	Pyridoxal-dependent decarboxylase domain-containing protein 1	Pdxdc1	-0.0465115	0.0878306	0.0719881	0.134223	1488	-0.892983	0.145531	0.00614113	0.0227156	1	-1.00498	-0.876986	-0.796985
PG4118	Q61074;A0A0J9YVG0	Protein phosphatase 1G	Ppm1g	0.245665	-0.272031	-0.254283	-0.328389	1489	0.975144	0.665698	0.00615177	0.0227396	1	1.24062	0.825549	0.859264
PG0370	D3Z6W1;A0A140LIT9;Q7TSJ2-3;Q7TSJ2-2;Q7TSJ2	Microtubule-associated protein 6	Map6	-0.377961	0.114882	0.472384	0.194175	1490	1.03899	0.68314	0.00615663	0.0227423	1	0.723962	1.31469	1.07832
PG6241	Q9WV86;E9QKG2;E9PZI6	Katanin p60 ATPase-containing subunit A1	Katna1	-0.993471	0.74192			1491	1.54919	0.812137	0.0062402	0.0230356	1		1.68204	1.41635
PG4463	Q7TSV4	Phosphoglucomutase-2	Pgm2	-0.158391	0.315498	0.189787	0.420959	1492	1.02104	0.678416	0.00624541	0.0230394	1	0.711413	1.0835	1.26819
PG2917	P70444	BH3-interacting domain death agonist;BH3-interacting domain death agonist p15;BH3-interacting domain death agonist p13;BH3-interacting domain death agonist p11	Bid	-0.0899473	-0.0288696	0.134008	-0.00455701	1493	-0.876287	0.149164	0.00625358	0.0230448	1	-0.943857	-0.80359	-0.881413
PG3710	Q3UIR3;I6L9G8;Q3UIR3-2	E3 ubiquitin-protein ligase DTX3L	Dtx3l	1.44663	0.887743			1494	1.99152	0.894804	0.00625525	0.0230448	1	1.58582		2.39723
PG5796	Q9D0F1	Kinetochore protein NDC80 homolog	Ndc80	-2.99237	-0.773143			1495	3.79768	0.997093	0.00626257	0.0230563	1		3.79768
PG4009	Q5FWB6		Rplp0	-1.31264	-1.69027			1496	2.3798	0.939317	0.00626975	0.0230673	1	1.81036	2.94923
PG5882	Q9D6M3;E9PV90;E9PY45;E9Q6M6;A0A0J9YTY6	Mitochondrial glutamate carrier 1	Slc25a22	-0.154973	-0.149217	0.222537	-0.146028	1497	-0.901524	0.144622	0.00628655	0.0231137	1	-0.934699	-0.754193	-1.01568
PG1866	Q6PE70;G5E8F8;O70309;O70309-2	Integrin beta;Integrin beta-5	Itgb5	-0.579184	-1.00213	0.805468	-1.15163	1498	1.73034	0.848656	0.00630145	0.023153	1	1.9616	2.37735	0.852065
PG3072	Q05DE0;Q9EPJ9;Q6PB94;Q3TGS9;V9GXM1;Q9EPJ9-2;V9GWV1	ADP-ribosylation factor GTPase-activating protein 1	Arfgap1	0.197967	0.202976	-0.234074	0.254751	1499	-0.96414	0.133358	0.00630666	0.0231567	1	-1.00618	-1.16517	-0.721071
PG6094	Q9JI13-2;Q9JI13;Q05DV3;Q05DC6	Something about silencing protein 10	Utp3	0.16441	-1.25443	-0.0775894	-1.51979	1500	1.83904	0.866461	0.00631851	0.0231728	1	2.63898	1.93954	0.938589
PG2035	O35459;F7B227	Delta(3,5)-Delta(2,4)-dienoyl-CoA isomerase, mitochondrial	Ech1	2.32667	-0.482172			1501	2.6588	0.958394	0.00631947	0.0231728	1	3.33655		1.98104
PG4355	Q6QI06-2;Q6QI06;Q8R5D5;Q0VAV3	Rapamycin-insensitive companion of mTOR	Rictor	1.21865	0.479044	-1.49561	0.508376	1502	-1.98187	0.0392442	0.00633339	0.0232084	1	-1.61097	-3.05038	-1.28426
PG2375	P21981	Protein-glutamine gamma-glutamyltransferase 2	Tgm2	-1.60579	-1.20528			1503	-2.25822	0.0270712	0.00635	0.0232322	1	-1.73358		-2.78285
PG0803	B1ATZ0;B1ATZ1;Q3TLL4;Q3UMA3;Q99LI8	Hepatocyte growth factor-regulated tyrosine kinase substrate	Hgs	0.178188	0.100547	-0.201918	0.13145	1504	0.915865	0.648801	0.00635147	0.0232322	1	0.923168	0.749949	1.07448
PG5399	Q921M7	Protein FAM49B	Fam49b	0.327861	0.219817	-0.393167	0.264722	1505	-1.03112	0.12391	0.00635254	0.0232322	1	-1.0098	-1.33909	-0.744455
PG4749	Q8BU22;Q922S8;Q3TTL2;Q3UD72	Kinesin-like protein;Kinesin-like protein KIF2C	Kif2c	0.048869	-0.884567	0.0333649	-1.05935	1506	1.40871	0.780887	0.00636351	0.0232568	1	1.92496	1.5318	0.769365
PG1763	Q3U2B5;F8WJD4;Q80X82;Q3U2V0;Q3TN10;Q3TA76	Symplekin	Sympk	0.318046	0.0496872	-0.367737	0.0580507	1507	0.968368	0.663881	0.00636799	0.0232577	1	1.08464	0.700303	1.12016
PG4769	Q8BVQ5	Protein phosphatase methylesterase 1	Ppme1	-0.900836	-0.800611	1.18011	-0.879711	1508	1.79837	0.859557	0.00639038	0.023324	1	1.72906	2.66437	1.00168
PG3081	Q07797	Galectin-3-binding protein	Lgals3bp	1.42924	-0.0849566			1509	1.69566	0.842478	0.00640062	0.0233459	1	1.95335		1.43796
PG1813	H3BIW0;G3X8T2;Q0P678	Zinc finger CCCH domain-containing protein 18	Zc3h18	0.534398	-0.0469914	-0.622818	-0.0774469	1510	-1.11633	0.113917	0.00640496	0.0233463	1	-0.82085	-1.53902	-0.98913
PG5593	Q9CQ60;Q8CBG6;Q8C6M6;F6X8L5	6-phosphogluconolactonase	Pgls	0.102134	0.197505	-0.11725	0.255875	1511	0.930515	0.653161	0.00642463	0.0234025	1	0.837621	0.807083	1.14684
PG4889	Q8C9T0;Q9CWN7;A0A0A6YW44	CCR4-NOT transcription complex subunit 11	Cnot11	-0.905102	-1.37486			1512	1.86774	0.87282	0.00644445	0.0234347	1	1.51266	2.22281
PG4387	Q6ZQI3	Malectin	Mlec	0.316601	0.112074	-0.370935	0.134247	1513	-0.979505	0.130451	0.00644508	0.0234347	1	-0.900898	-1.25817	-0.779442
PG0300	A0A0R4J1B6;Q6PAL8	DENN domain-containing protein 5A	Dennd5a	-2.95582	-0.764344			1514	3.75139	0.996548	0.00644624	0.0234347	1		3.75139
PG0450	Q3UDS7;Q3TJ10;A0A1L1SSF2;Q8VDL4-3;Q8VDL4	ADP-dependent glucokinase	Adpgk	-0.100122	0.307892	0.119624	0.406943	1515	0.992619	0.670967	0.00646852	0.0235001	1	0.720374	1.00997	1.24752
PG1619	E9QM77;O70305-2;O70305;O70305-3;F6U2C2;Q3UX07	Ataxin-2	Atxn2	0.068087	-0.195354	-0.0447042	-0.220437	1516	-0.883012	0.147892	0.00647935	0.023524	1	-0.763049	-0.90519	-0.980797
PG2705	Q3UDC8;P58252;Q8BMA8;Q3UZ14;Q3UMI7;Q3TK17;Q3TX47;Q3TWX1;Q3TLB1;Q3TJZ1;Q6P9L9;Q8C153;Q3UBL9;Q3TW58;Q3TSK4	Elongation factor 2	Eef2	-0.194873	-0.5928	0.30622	-0.683721	1517	1.15011	0.717297	0.00651951	0.0236542	1	1.35646	1.41294	0.680949
PG5468	Q99JZ4;Q3TXJ4;P36536	GTP-binding protein SAR1a	Sar1a	0.169606	-0.083955	-0.176845	-0.0928471	1518	0.8848	0.639535	0.00653045	0.0236676	1	0.996249	0.760518	0.897633
PG4689	Q8BM77;Q91ZZ5;E9Q0U9;B7ZMU5;B7ZMU6;A0A0J9YV81	Relaxin receptor 2	Rxfp2	-2.07444	2.1709			1519	-3.73046	0.0012718	0.0065318	0.0236676	1	-3.73046
PG0408	A0A1B0GSV1;Q9D8P4	39S ribosomal protein L17, mitochondrial	Mrpl17	1.3458	0.775375			1520	1.83891	0.866279	0.00655195	0.023725	1	1.49355		2.18428
PG3378	Q3TQU6;Q3UX91;Q61142-2;Q61142;Q3TLF7;Q3TQU2;Q3UWM7	Spindlin-1	Spin1	1.4643	0.934776			1521	2.026	0.899891	0.00655875	0.0237339	1	1.59099		2.46101
PG2095	Q3UU11;O54998	Peptidyl-prolyl cis-trans isomerase FKBP7	Fkbp7	-2.93305	-0.758863			1522	3.72256	0.996185	0.0065645	0.0237392	1		3.72256
PG5322	Q91WC0;F2Z420	Histone-lysine N-methyltransferase setd3	Setd3	-0.198503	-0.453221	0.299544	-0.513213	1523	1.0436	0.685683	0.00657083	0.0237409	1	1.16544	1.28301	0.682343
PG3928	Q52KC5;Q9CQP3	Coiled-coil-helix-coiled-coil-helix domain-containing protein 5	Chchd5	-0.132092	0.790618	0.120119	0.998217	1524	1.41675	0.783794	0.00657424	0.0237409	1	0.841301	1.36864	2.0403
PG4339	Q6PFF0;Q7TSH6;Q69ZP8;Q8R1B3		Scaf4	0.296983	-0.225653	-0.320291	-0.276007	1525	0.966791	0.663517	0.00657791	0.0237409	1	1.23383	0.767455	0.899088
PG3045	Q03145	Ephrin type-A receptor 2	Epha2	0.145018	0.686548	-0.208166	0.848763	1526	1.31024	0.755269	0.00659196	0.023776	1	0.952656	1.06036	1.91769
PG3681	Q3UGR5	Haloacid dehalogenase-like hydrolase domain-containing protein 2	Hdhd2	-0.484823	-1.18589			1527	1.49899	0.800145	0.00662176	0.0238678	1	1.39238	1.60559
PG2645	Q8BP79;P53702;G3UXK7	Cytochrome c-type heme lyase	Hccs	-0.639205	-0.214477	0.815817	-0.186219	1528	1.23045	0.736374	0.00664473	0.0239349	1	0.962545	1.77694	0.951852
PG0905	B2RTE3;Q4FK66	Pre-mRNA-splicing factor 38A	Prpf38a	-1.66976	0.312296	2.02559	0.540004	1529	2.43815	0.942769	0.00666203	0.0239793	1	1.27748	3.70868	2.3283
PG0222	Q6P9T6;A0A0R4J079;Q8BMP6;Q3TJW1	Golgi resident protein GCP60	Acbd3	0.274735	-0.0181974	-0.309745	-0.0212095	1530	-0.92464	0.139535	0.00666805	0.0239793	1	-0.792706	-1.14531	-0.835907
PG2939	P82343;D6RHA2;P82343-2	N-acylglucosamine 2-epimerase	Renbp	-0.319347	-0.195649	0.425856	-0.189279	1531	-0.974456	0.131722	0.00667011	0.0239793	1	-1.07297	-0.687051	-1.16335
PG1281	D3Z5I1;Q3UPF5;Q3UPF5-2;Q8K302;G3X9X5	Zinc finger CCCH-type antiviral protein 1	Zc3hav1	-0.0274537	-0.223429	0.0735588	-0.246901	1532	0.881821	0.63899	0.00668701	0.0240243	1	0.96445	0.941264	0.73975
PG1977	Q3U518;O08795;O08795-2;Q3TWG2	Glucosidase 2 subunit beta	Prkcsh	0.217053	0.107411	-0.249665	0.136659	1533	0.919888	0.650254	0.00669229	0.0240276	1	0.94507	0.721628	1.09297
PG2058	Q8C295;Q3V3Z5;O35704;Q3TST8;Q3V3A0;Q3TTW4	Serine palmitoyltransferase 1	Sptlc1	-0.416763	0.192796	0.513322	0.292346	1534	1.06935	0.694041	0.00670216	0.0240474	1	0.686396	1.36136	1.16029
PG5382	Q91Z96-2;Q91Z96	BMP-2-inducible protein kinase	Bmp2k	-1.13513	-0.360529			1535	-1.45534	0.0734012	0.00670887	0.0240558	1	-1.43173		-1.47895
PG3022	Q3TJ55;Q80W45;Q00262;Q3TN38	Syntaxin-2	Stx2	0.562606	1.09005			1536	-1.52975	0.0674055	0.00671363	0.0240572	1	-1.38011	-1.67939
PG1913	I1E4X1;Q8K1E0-2;Q8K1E0;H3BJ02;H3BJE3;H3BKJ7	Syntaxin-5	Stx5a;Stx5	0.640044	-0.353665	-0.726772	-0.460022	1537	1.26079	0.742188	0.00672826	0.0240939	1	1.79705	0.811507	1.17381
PG1564	E9Q8N0;E9Q8M9;Q60695;Q69ZU7	Ral guanine nucleotide dissociation stimulator-like 1	Rgl1	-0.447504	-1.17556			1538	1.47379	0.795603	0.00676303	0.0242027	1	1.39055	1.55703
PG2731	Q545S6;P60003	Transcription elongation factor 1 homolog	Elof1	-2.89076	-0.748683			1539	3.669	0.99564	0.00679238	0.0242785	1		3.669
PG2534	P43274	Histone H1.4	Hist1h1e	1.08089	0.615196	-1.33911	0.685618	1540	1.87421	0.874273	0.00679478	0.0242785	1	2.08693	0.890099	2.64559
PG2525	Q549D0;Q3UC80;Q8BT06;P41731	Tetraspanin;CD63 antigen	Cd63	1.41756	1.10979	-1.78728	1.26138	1541	2.55721	0.951126	0.00679744	0.0242785	1	2.66777	1.2109	3.79297
PG5677	Q9CRT8	Exportin-T	Xpot	-0.035765	-0.246771	0.0855065	-0.27469	1542	0.886858	0.640807	0.00680273	0.0242816	1	0.978585	0.957341	0.724648
PG5085	Q8K4Z3	NAD(P)H-hydrate epimerase	Apoa1bp	-0.528925	0.0939899	0.657388	0.180978	1543	-1.12102	0.113735	0.0068078	0.0242839	1	-1.5089	-0.720775	-1.13338
PG2025	Q9D8S5;O35326;Q5U448	Serine/arginine-rich splicing factor 5	Srsf5	0.738002	0.733209	-0.932049	0.857425	1544	1.64668	0.83085	0.00683083	0.0243177	1	1.59619	0.914262	2.42959
PG6400	W6PPA1;S4R2K9;W6PPR4;S4R1S2;G5E8K2;G5E8K3;S4R2S8;G5E8K5-2;G5E8K5-3;G5E8K5	Ankyrin-3	Ank3	-0.592085	0.275411	0.719689	0.407355	1545	-1.23553	0.100109	0.00683512	0.0243177	1	-1.76623	-0.819025	-1.12134
PG4412	Q78KL9;Q3TAV0;Q3UD20;Q3T9B4;Q9D8S4;A0A1L1SS58	Oligoribonuclease, mitochondrial	Rexo2	-0.748661	-0.100796	0.939724	-0.0386831	1546	1.31097	0.756177	0.00683603	0.0243177	1	0.914146	1.92348	1.09529
PG0604	A2ALB2;Q6PAQ4;A2ALB1	RNA exonuclease 4	Rexo4	0.6004	0.22338	-0.724447	0.246895	1547	-1.20968	0.102653	0.00683869	0.0243177	1	-1.03666	-1.73606	-0.856311
PG0211	Q3UJA9;A0A0R4J031;Q8C006	Tripartite motif-containing protein 35	Trim35	-0.341681	-1.18265			1548	1.44483	0.789971	0.00683997	0.0243177	1	1.43515	1.45452
PG4502	Q80W68;Q80W68-2	Kin of IRRE-like protein 1	Kirrel	-0.387062	0.44679	0.457081	0.599669	1549	-1.18829	0.105741	0.00684377	0.0243177	1	-1.70452	-0.96789	-0.89247
PG2593	Q542F4;P49717;Q921D5;Q8C1Z0;Q3UA65;Q9D077;Q5DTS8	DNA replication licensing factor MCM4	Mcm4	-0.131235	-0.211895	0.198686	-0.224393	1550	0.890149	0.641897	0.00685015	0.0243247	1	0.907395	1.03033	0.732721
PG6273	Q9Z1F9	SUMO-activating enzyme subunit 2	Uba2	-0.178121	0.121474	0.229155	0.185956	1551	-0.908184	0.14335	0.00686476	0.0243309	1	-1.11433	-0.793384	-0.816842
PG0273	A0A0R4J0T8;Q9D8S3	ADP-ribosylation factor GTPase-activating protein 3	Arfgap3	0.173496	-0.0876053	-0.181279	-0.0976149	1552	-0.874804	0.149346	0.0068651	0.0243309	1	-0.759003	-1.00151	-0.863903
PG0609	A2AM95;O08579;Q3THM8;I7HJS1;B7FAU5	Emerin	Emd	-0.0405799	0.190896	0.0566	0.259426	1553	-0.904708	0.143532	0.00686516	0.0243309	1	-1.07424	-0.912878	-0.727009
PG1333	E0CXB5;F6TFF2;Q8R143;Q3U9U7	Pituitary tumor-transforming gene 1 protein-interacting protein	Pttg1ip	-3.08978	1.08635			1554	3.62896	0.994913	0.00686966	0.0243311	1		4.67841	2.57952
PG5042	Q8K273	Membrane magnesium transporter 1	Mmgt1	-0.349638	-0.36252	0.475895	-0.390309	1555	-1.04834	0.121366	0.00689667	0.0244111	1	-1.06537	-0.705276	-1.37436
PG2148	O70591;F8WJ30	Prefoldin subunit 2	Pfdn2	0.58752	-0.0691055	-0.685579	-0.108736	1556	-1.14056	0.111192	0.00690856	0.0244375	1	-0.802028	-1.60152	-1.01812
PG2686	P56480	ATP synthase subunit beta, mitochondrial	Atp5b	0.210852	-0.0288111	-0.231317	-0.0289558	1557	0.885637	0.64008	0.00692856	0.0244925	1	0.987788	0.718008	0.951114
PG6083	Q9JHF5;Q9JL12;Q91W06	V-type proton ATPase subunit a	Tcirg1	-0.164702	-0.181906	0.236949	-0.1851	1558	0.887993	0.641352	0.00696498	0.0246	1	0.868638	1.04926	0.746083
PG0676	A2BFF7;Q3TPJ8;O88487;A2BFF8;D6Q0F7;A2BFF9;D6Q0F6;D6Q0F5;A2BFF5;Q3UDA2	Cytoplasmic dynein 1 intermediate chain 2	Dync1i2	-0.187967	0.138894	0.239731	0.208001	1559	0.914094	0.647892	0.00696792	0.0246	1	0.692105	1.03348	1.0167
PG2294	Q3TW82;P12265;Q8BPE3;Q99KJ6;Q8VEM0	Beta-glucuronidase	Gusb	0.667917	-1.23259			1560	-1.6068	0.0617733	0.00699782	0.0246837	1		-1.37707	-1.83652
PG0910	B2RTN5;Q91YM2;Q3TSU7	Rho GTPase-activating protein 35	Arhgap35	-0.822529	-0.412597	1.0542	-0.412908	1561	-1.45497	0.0735828	0.0070006	0.0246837	1	-1.7093	-0.724672	-1.93095
PG6227	Q9WTV7	E3 ubiquitin-protein ligase RLIM	Rlim	0.755384	-0.964331			1562	-1.44314	0.0750363	0.007018	0.0247293	1		-1.38841	-1.49786
PG4778	Q8BWT1;Q3UKH3	3-ketoacyl-CoA thiolase, mitochondrial	Acaa2	-0.49036	-0.0431872	0.621444	0.0105567	1563	1.06353	0.692406	0.0070326	0.0247504	1	0.77845	1.45883	0.953329
PG1366	E9PUB7;Q2YDW2;Q2YDW2-2;D3YX87	Protein misato homolog 1	Msto1	-0.280291	-0.240661	0.381997	-0.247346	1564	-0.952692	0.135538	0.007033	0.0247504	1	-1.00257	-0.688005	-1.1675
PG1775	G3UW86;Q99K43;G3UWQ7;G3XA79;G3UY19	Protein regulator of cytokinesis 1	Prc1	-0.075996	-0.551348	0.158553	-0.642842	1565	1.06696	0.693496	0.00705047	0.024796	1	1.31591	1.227	0.657984
PG5859	Q9D385-2;Q9D385	ADP-ribosylation factor-like protein 2-binding protein	Arl2bp	1.28787	-0.779926			1566	-1.7305	0.0541424	0.00705763	0.0248054	1		-2.04017	-1.42084
PG6146	Q9JMA2	Queuine tRNA-ribosyltransferase	Qtrt1	1.144	0.187192			1567	1.43078	0.786519	0.00708088	0.0248712	1	1.45503		1.40653
PG3844	Q9JIH5;Q3UZ77;Q9JIH4;Q8VHJ6;Q9WV30-4;Q9WV30;Q9WV30-2;F6VCW7	Nuclear factor of activated T-cells 5	Nfat5	1.29915	-0.02846			1568	1.55573	0.814135	0.00711074	0.0249496	1	1.75328		1.35818
PG4104	Q60864;Q3THQ5	Stress-induced-phosphoprotein 1	Stip1	0.299759	-0.0617536	-0.336678	-0.076361	1569	0.921219	0.650799	0.00711659	0.0249496	1	1.09301	0.68877	0.981881
PG3272	Q3THH1;Q922R8;Q3TML0;Q3TJL8;Q9DAB4	Protein disulfide-isomerase A6	Pdia6	-0.203552	0.371573	0.240182	0.493015	1570	1.03753	0.682413	0.00712233	0.0249496	1	0.6693	1.12551	1.31779
PG2045	Q3UER5;Q3UG09;O35607	Receptor protein serine/threonine kinase;Bone morphogenetic protein receptor type-2	Bmpr2	0.139786	1.20289			1571	-1.51286	0.0686773	0.00712682	0.0249496	1	-1.67412	-1.3516
PG6250	Q9WVJ3-2;Q9WVJ3	Carboxypeptidase Q	Cpq	0.702496	-1.99051			1572	-2.30765	0.0250727	0.00712793	0.0249496	1		-1.72906	-2.88623
PG4903	Q8CBY1-3;Q8CBY1;Q8CBY1-2	Protein Smaug homolog 1	Samd4a	-0.629719	-0.323114	0.812924	-0.31947	1573	1.23183	0.736919	0.0071304	0.0249496	1	1.03346	1.79122	0.870809
PG6167	Q9QXX8	Nuclear fragile X mental retardation-interacting protein 1	Nufip1	0.341704	-0.5207	-0.351176	-0.639447	1574	1.12339	0.709484	0.00713988	0.0249669	1	1.58996	0.943938	0.836268
PG5168	Q8R4U7;B2RQ68;B7ZW89;Q6KAP6	Leucine zipper protein 1	Luzp1;mFLJ00226	-0.321663	-0.635999	0.463636	-0.726087	1575	-1.20688	0.103016	0.00714972	0.0249779	1	-1.04657	-0.834615	-1.73944
PG3237	Q3TF16		Hspa8	-0.825821	-2.87171			1576	-3.58941	0.00145349	0.00715212	0.0249779	1			-3.58941
PG2837	Q56A15;P62897	Cytochrome c, somatic	Cycs	1.12332	0.00179006	-1.34193	-0.0658678	1577	1.68301	0.838299	0.00717915	0.0250565	1	2.28203	0.780627	1.98636
PG4788	Q8BXV2	BRI3-binding protein	Bri3bp	-0.546917	-0.108568	0.695324	-0.0645726	1578	-1.10677	0.115734	0.00718711	0.0250684	1	-1.38515	-0.653967	-1.28119
PG1823	S4R1Y5;G3X926;Q9JJ80	Ribosome production factor 2 homolog	Rpf2	0.197722	-0.368981	-0.188358	-0.442716	1579	0.962852	0.662427	0.00720737	0.0251231	1	1.25854	0.869835	0.760182
PG5644	Q9CQW9	Interferon-induced transmembrane protein 3	Ifitm3	1.15929	-0.156693	-1.37303	-0.26206	1580	-1.72516	0.0546875	0.0072232	0.0251623	1	-1.01222	-2.6264	-1.53686
PG2069	O35954	Membrane-associated phosphatidylinositol transfer protein 1	Pitpnm1	-0.706354	0.897498			1581	1.444	0.789789	0.00728315	0.0253551	1		1.3532	1.5348
PG5116	Q8R151;A2A5R6	NFX1-type zinc finger-containing protein 1	Znfx1	0.474327	0.216813	-0.57081	0.249143	1582	1.08696	0.699491	0.00729801	0.0253908	1	1.19271	0.662541	1.40564
PG1676	F6UIS1;Q9CQE7;Q9CQE7-2;F6RK81	Endoplasmic reticulum-Golgi intermediate compartment protein 3	Ergic3	0.82885	2.7365			1583	3.54785	0.993823	0.00735065	0.0255578	1			3.54785
PG4027	Q5NCK8;Q9WTU6-3;Q9WTU6-4;Q9WTU6-2;Q9WTU6;Q8C094	Mitogen-activated protein kinase;Mitogen-activated protein kinase 9	Mapk9	-0.2414	0.194513	0.300208	0.280173	1584	-0.943955	0.137355	0.0073692	0.0255958	1	-1.22895	-0.792367	-0.810542
PG3496	Q3U1V3;Q99MK8;Q7TS64;E9PW16	Beta-adrenergic receptor kinase 1	Adrbk1	-0.144491	-0.0593953	0.202675	-0.0373452	1585	0.852243	0.628452	0.00737088	0.0255958	1	0.771923	0.974269	0.810536
PG0328	A0A0R4J254;Q9ESJ0	Exportin-4	Xpo4	0.123196	-0.265125	-0.106093	-0.310004	1586	0.886012	0.640443	0.00739505	0.025635	1	1.07829	0.832958	0.746787
PG0416	A0A1C7CYV0;B1AX58;Q99K51;Q3UKB1;Q3UJG9	Plastin-3	Pls3	-0.297913	0.239565	0.365266	0.339711	1587	0.99079	0.67024	0.00739509	0.025635	1	0.647283	1.17903	1.14605
PG2033	O35405	Phospholipase D3	Pld3	0.658513	0.679926	-0.831278	0.798914	1588	-1.51042	0.0690407	0.00740207	0.025635	1	-1.5743	-2.16929	-0.787672
PG5849	Q9D289	Trafficking protein particle complex subunit 6B	Trappc6b	1.97917	-2.15818			1589	3.53695	0.993459	0.00740397	0.025635	1	3.53695
PG2040	O35551-3;O35551;O35551-5;O35551-6;O35551-2;J3QJV7	Rab GTPase-binding effector protein 1	Rabep1	-0.299268	0.034334	0.383208	0.0895466	1590	-0.924632	0.139717	0.00740864	0.025635	1	-1.14767	-0.696619	-0.929608
PG0589	A2AJL3-2;A2AJL3;H3BJ80;B1AY71;D6RHR3;A2AJL4	FGGY carbohydrate kinase domain-containing protein	Fggy	2.79752	0.62064			1591	-3.53487	0.00181686	0.00741421	0.025635	1		-3.53487
PG2044	Q3U2B2;Q7TMD4;O35604	Niemann-Pick C1 protein	Npc1	-0.144181	0.328729	0.171478	0.435938	1592	0.980142	0.667333	0.00742449	0.025635	1	0.670723	1.02876	1.24094
PG2566	Q3UCH0;P47911;Q3UFI4;E9PUX4	60S ribosomal protein L6	Rpl6;Gm5428	0.0313065	-0.218033	0.00176645	-0.245102	1593	-0.855527	0.152798	0.0074267	0.025635	1	-0.742924	-0.844045	-0.979611
PG3531	Q3U417;Q8C8U0;Q3UJ84;Q8C8U0-3;Q8C8U0-2	Liprin-beta-1	Ppfibp1	0.0170494	0.16683	-0.0114796	0.22539	1594	0.873743	0.634993	0.00742904	0.025635	1	0.750952	0.824069	1.04621
PG2810	P62488	DNA-directed RNA polymerase II subunit RPB7	Polr2g	0.657379	0.460391	-0.812469	0.531289	1595	1.35126	0.76508	0.00743031	0.025635	1	1.41643	0.73468	1.90268
PG5363	Q91YL3	Uridine-cytidine kinase-like 1	Uckl1	0.397795	-0.343932	-0.433334	-0.428445	1596	1.04041	0.683685	0.0074334	0.025635	1	1.43421	0.782825	0.904185
PG1661	F6QM56;Q8BP56-2;Q8BP56;Q8BP56-3	Acid trehalase-like protein 1	Athl1	-0.130844	0.336828	0.154637	0.44473	1597	-0.980485	0.130269	0.0074701	0.0257359	1	-1.28716	-0.944049	-0.710244
PG3042	Q02788;D3Z7D5	Collagen alpha-2(VI) chain	Col6a2	-0.313679	0.528403	0.361478	0.693224	1598	1.18522	0.726744	0.00747203	0.0257359	1	0.66219	1.33161	1.56185
PG5600	Q9CQ88	Tetraspanin-31	Tspan31	-0.657161	0.997228			1599	1.49073	0.79851	0.00751825	0.0258779	1		1.32625	1.6552
PG2620	P51863;Q921S5	V-type proton ATPase subunit d 1	Atp6v0d1	0.248258	0.192301	-0.294304	0.237642	1600	-0.935355	0.138626	0.00752265	0.0258779	1	-0.942709	-1.17455	-0.688808
PG2446	P30051;Q6PAQ8;Q3UFP5;E9PZ73;Q80W05;Q3USK5	Transcriptional enhancer factor TEF-1	Tead1	-1.15524	-1.48546			1601	2.08502	0.906432	0.00759048	0.0260728	1	1.58169	2.58836
PG3744	Q3ULN8;Q6PD03	Serine/threonine-protein phosphatase 2A 56 kDa regulatory subunit alpha isoform	Ppp2r5a	1.00875	0.133576	-1.21326	0.104162	1602	1.54864	0.811228	0.00759313	0.0260728	1	2.00516	0.712944	1.92781
PG1620	E9QM90;Q148V7;A0A087WSS1;G3X9J4;Q148V7-2	LisH domain and HEAT repeat-containing protein KIAA1468	2310035C23Rik;Kiaa1468	-0.258083	-0.355376	0.364135	-0.389046	1603	0.971228	0.664608	0.00759352	0.0260728	1	1.00165	1.2398	0.672242
PG5827	Q9D1F4;D3Z4W3;D3Z4R0;F6R8S6;E9QKI5;E9QKI4;A0A140LJJ3;D3YWZ1	Proline-rich AKT1 substrate 1	Akt1s1	-0.280461	0.167224	0.349814	0.250072	1604	0.942463	0.656068	0.00763901	0.0262126	1	0.651539	1.1304	1.04545
PG5975	Q9DBN9	Probable ATP-dependent RNA helicase DDX59	Ddx59	1.09365	-0.75915			1605	-1.54768	0.0657703	0.0076529	0.0262334	1		-1.76703	-1.32833
PG2468	Q5J7N1;Q3U2W7;P32883-2;Q82954;Q0VDV7;P32883;Q71SW8;C0H5X4	GTPase KRas;GTPase KRas, N-terminally processed	Kras;Hras	0.834725	-0.358657	-0.962816	-0.481947	1606	1.39992	0.778525	0.00765458	0.0262334	1	2.049	0.796041	1.35471
PG3253	Q3TG58;Q9WUK2-2;Q564E5;Q9WUK2;Q80U88;Q3V244	Eukaryotic translation initiation factor 4H	Eif4h;mKIAA0038	0.327015	0.0938183	-0.382133	0.111138	1607	-0.936249	0.138445	0.00767963	0.0263028	1	-0.840981	-1.2198	-0.747968
PG3194	Q99LR9;Q3V2R6;Q3UYW1;Q3TC66;Q9DBU3;Q3TJT2;Q9CXZ8	Serine/threonine-protein kinase RIO3	Riok3	0.214964	-1.91919			1608	2.10988	0.910974	0.00768719	0.0263124	1	2.62775	1.59201
PG5310	Q91VW5;A0A1D5RME8;Q4VAB1	Golgin subfamily A member 4	Golga4	0.251345	0.50454	-0.322847	0.618159	1609	1.1268	0.710938	0.00769373	0.0263184	1	0.936745	0.826289	1.61738
PG4534	Q80YD1	ATP-dependent RNA helicase SUPV3L1, mitochondrial	Supv3l1	-0.0434997	-0.30936	0.0998704	-0.350387	1610	0.885037	0.639717	0.00770727	0.0263483	1	1.00937	0.973498	0.672242
PG2459	P31361;Q3TYV9;A6H6L6;P62515;P31360;P21952	POU domain, class 3, transcription factor 3;POU domain protein;POU domain, class 3, transcription factor 4;POU domain, class 3, transcription factor 2;POU domain, class 3, transcription factor 1	Pou3f3;Pou3f4;Pou3f2;Pou3f1	1.94472	-2.12139			1611	3.4752	0.992188	0.00771675	0.0263536	1	3.4752
PG3904	Q4VA32;Q9CQR4	Acyl-coenzyme A thioesterase 13;Acyl-coenzyme A thioesterase 13, N-terminally processed	Acot13	0.720335	-1.16104	-0.760173	-1.45112	1612	1.86869	0.873001	0.00772099	0.0263536	1	2.9272	1.50745	1.17142
PG6124	Q9JJV2-3;Q9JJV2;D3YWS3;Q9JJV2-2	Profilin-2;Profilin	Pfn2	-0.687865	0.888731			1613	1.42058	0.78452	0.00772316	0.0263536	1		1.32447	1.51669
PG0769	A9CLV6;Q9QZI8;E9Q553;Q8C5F9;E9PY81	Serine incorporator 1	Serinc1	-0.868565	-1.28499			1614	1.74984	0.852834	0.00773612	0.0263812	1	1.40159	2.09808
PG5109	Q8R0K4;H3BLI5	Coiled-coil domain-containing protein 137	Ccdc137	0.588072	-0.957233	-0.615724	-1.19183	1615	-1.59544	0.0625	0.00774084	0.0263812	1	-0.731963	-1.88943	-2.16492
PG2617	Q3TT11;P51660;Q3UHW2	Peroxisomal multifunctional enzyme type 2;(3R)-hydroxyacyl-CoA dehydrogenase;Enoyl-CoA hydratase 2	Hsd17b4	0.103021	-0.351189	-0.0747573	-0.413315	1616	0.910812	0.647347	0.00775329	0.0264072	1	1.14254	0.890099	0.699792
PG5462	Q99JW2;A0A1L1SS90;A0A0R4J050;A0A1L1SRC1;A0A087WPX1;A0A1L1SRW7	Aminoacylase-1	Acy1	-0.321962	0.395854	0.382062	0.532258	1617	1.07898	0.697129	0.00779649	0.026538	1	0.629578	1.25698	1.35038
PG4686	Q8BM55;D3Z6S1	Transmembrane protein 214	Tmem214	1.2011	-0.1012	-1.42822	-0.19779	1618	1.73307	0.849382	0.00780339	0.026545	1	2.43683	0.78796	1.97442
PG6060	Q9ERA0;Q9ERA0-2;Q9ERA0-3	Alpha-globin transcription factor CP2	Tfcp2	-0.162329	0.525417	0.1779	0.67727	1619	-1.11613	0.114099	0.00781162	0.0265566	1	-1.55198	-1.09009	-0.706325
PG5636	Q9CQU3	Protein RER1	Rer1	-0.867963	0.930059	1.00276	1.22812	1620	1.85773	0.870094	0.0078338	0.0266156	1	0.784622	2.37124	2.41732
PG5703	Q9CWY8;Q05C51;D3YWG3;F6RP29	Ribonuclease H2 subunit A;Ribonuclease	Rnaseh2a	-1.84581	0.719433			1621	2.25079	0.927326	0.00785542	0.0266726	1		2.83496	1.66663
PG5533	Q99MN9;E9Q1J7;A0PJE6;Q8CFZ3;Q7TMF4;Q3UYS0;D3YZC1	Propionyl-CoA carboxylase beta chain, mitochondrial	Pccb	0.454397	0.231895	-0.547803	0.269157	1622	1.05777	0.690225	0.00786865	0.0266855	1	1.14336	0.646424	1.38352
PG2508	Q3UMP2;P38060	Hydroxymethylglutaryl-CoA lyase, mitochondrial	Hmgcl	0.101241	-0.913928	-0.0279088	-1.09942	1623	1.36582	0.76835	0.00786893	0.0266855	1	1.92897	1.45261	0.715885
PG5826	Q9D1E6	Tubulin-folding cofactor B	Tbcb	-0.636359	-0.0883998	0.80235	-0.0327018	1624	-1.15672	0.10883	0.00787465	0.0266885	1	-1.49749	-0.63626	-1.3364
PG1534	Q8BVX7;Q80UK2;Q3UM86;Q3U0V6;E9Q6D6;Q8BVL5		Zfp277	1.2536	0.172806	-1.51374	0.132083	1625	1.80725	0.861192	0.00790824	0.0267688	1	2.37878	0.768551	2.27443
PG3761	Q3UND0-2;Q3UND0	Src kinase-associated phosphoprotein 2	Skap2	0.803635	2.65104			1626	3.43908	0.991097	0.00790831	0.0267688	1			3.43908
PG4276	Q6NZM9	Histone deacetylase 4	Hdac4	0.330089	-0.00635509	-0.377912	-0.0112712	1627	-0.914171	0.142078	0.00791294	0.0267688	1	-0.757994	-1.18129	-0.803227
PG2152	Q3TJY2;O88342;Q3TE06;Q3TNK2;Q9DC08;Q9DBM8;Q80ZI9;Q3U136	WD repeat-containing protein 1	Wdr1	-0.390342	-0.0366639	0.499454	0.0103753	1628	0.957533	0.660792	0.00793183	0.0268162	1	0.725039	1.27169	0.87587
PG5971	Q9DBG9	Tax1-binding protein 3	Tax1bp3	0.117594	0.302363	-0.144353	0.38249	1629	0.937642	0.655523	0.00795022	0.0268619	1	0.791531	0.782092	1.2393
PG4346	Q6PGG6	Guanine nucleotide-binding protein-like 3-like protein	Gnl3l	-0.416341	-1.1168			1630	1.39414	0.77689	0.00796772	0.0268932	1	1.32032	1.46796
PG1474	Q3T9J2;E9QAR6;E9Q1A5;Q6P3F1;D3YX49;E9QAR4;E9QAR1;Q3U1E7		Zfp384	-0.244972	-0.320316	0.345427	-0.347358	1631	0.936309	0.65516	0.00796926	0.0268932	1	0.953416	1.18779	0.667718
PG4794	Q8BYA0	Tubulin-specific chaperone D	Tbcd	-0.0331909	0.117586	0.0534475	0.169425	1632	0.840635	0.625908	0.00799124	0.0269345	1	0.718581	0.840381	0.962943
PG2630	P52480	Pyruvate kinase PKM	Pkm	-0.15596	0.0957326	0.204285	0.152763	1633	0.857697	0.630269	0.00799285	0.0269345	1	0.679267	0.959644	0.934179
PG1825	G3X956;Q920B9	FACT complex subunit SPT16	Supt16;Supt16h	0.010476	-0.242539	0.0290109	-0.273291	1634	0.84646	0.627362	0.00800042	0.0269345	1	0.961783	0.879203	0.698394
PG3333	Q3TLE2;Q8CIB5;Q3UMA4	Fermitin family homolog 2	Fermt2	-0.389597	-0.0464915	0.49933	-0.00166982	1635	0.954539	0.65952	0.00800511	0.0269345	1	0.728271	1.26995	0.865394
PG6104	Q9JIK5;Q3ULC7;Q6PCP0;Q9CWZ5;Q8K2L4	Nucleolar RNA helicase 2	Ddx21	0.172071	-0.349404	-0.158759	-0.416757	1636	0.918081	0.649891	0.00800978	0.0269345	1	1.18773	0.841867	0.724648
PG6136	Q9JKK7-3;Q9JKK7	Tropomodulin-2	Tmod2	2.70701	0.598852			1637	-3.42025	0.0025436	0.00801087	0.0269345	1		-3.42025
PG1560	E9Q8D0;F6QYD2		Dnajc21	0.515153	0.0501529	-0.607159	0.0425839	1638	1.0442	0.686228	0.00802762	0.0269744	1	1.27144	0.618574	1.24258
PG2752	P61164	Alpha-centractin	Actr1a	-0.239203	-0.0145332	0.314139	0.0250679	1639	0.869536	0.633539	0.00803823	0.0269935	1	0.709264	1.05877	0.84057
PG2612	P51174	Long-chain specific acyl-CoA dehydrogenase, mitochondrial	Acadl	0.0045471	-0.164544	0.0300181	-0.177695	1640	0.822807	0.620094	0.00804331	0.0269941	1	0.888711	0.845584	0.734126
PG2357	Q9D881;P19536	Cytochrome c oxidase subunit 5B, mitochondrial	Cox5b	0.338707	-0.921281	-0.315726	-1.1277	1641	1.42156	0.784884	0.00808989	0.0271339	1	2.12307	1.32002	0.821597
PG4243	Q6GQT1	Alpha-2-macroglobulin-P	A2mp	-1.89277	1.97689			1642	-3.40476	0.00272529	0.0080966	0.0271399	1	-3.40476
PG5031	Q8K1N4;Q8K1N4-2	Spermatogenesis-associated serine-rich protein 2	Spats2	0.104433	0.590034	-0.151213	0.734368	1643	-1.14607	0.110465	0.00812214	0.0272089	1	-1.46954	-1.34533	-0.623336
PG4561	Q8BFW7;Q8BFW7-4;Q8BFW7-5	Lipoma-preferred partner homolog	Lpp	-0.0974963	-0.350703	0.168732	-0.39641	1644	0.900387	0.644077	0.0081311	0.0272156	1	1.01867	1.03978	0.642711
PG5191	Q8VCD5	Mediator of RNA polymerase II transcription subunit 17	Med17	-2.67683	-0.697185			1645	3.39807	0.989826	0.00813404	0.0272156	1		3.39807
PG3789	Q3URT1;Q6PCN7;E9PVX5;G3UVU1;Q3UQ12	Helicase-like transcription factor	Hltf	-1.33353	-1.5911			1646	2.27123	0.928779	0.0081467	0.0272414	1	1.66761	2.87485
PG1001	B7ZWE5;Q9Z0H7;Q3THY9	B-cell lymphoma/leukemia 10	Bcl10	0.486566	-0.108811	-0.559818	-0.148944	1647	-1.01234	0.126635	0.00816082	0.0272604	1	-0.707329	-1.38516	-0.944525
PG2571	P47968	Ribose-5-phosphate isomerase	Rpia	0.826289	-0.361961	-0.952308	-0.485289	1648	-1.36932	0.0843023	0.00816226	0.0272604	1	-0.723051	-1.96584	-1.41908
PG3843	Q6IQY0;Q6PG98;Q3UZ58;Q61578	NADPH:adrenodoxin oxidoreductase, mitochondrial	Fdxr	-0.283836	0.388152	0.336369	0.519764	1649	1.0409	0.684411	0.00822475	0.0274524	1	0.617561	1.18989	1.31524
PG0182	A0A0N4SV80;E9QML5;Q61464-4;Q61464;A0A0N4SV38;A0A0N4SVI8;E9QKZ7;Q61464-7;Q61464-2;Q61464-5;Q3TZK9;A0A0N4SVM8;Q3TNM0;Q3TQ35;Q3TQM2	Zinc finger protein 638	Zfml;Znf638	-0.0448391	-1.18584	0.171097	-1.41913	1650	1.62951	0.82758	0.00823792	0.027466	1	2.27084	1.88425	0.733423
PG2761	P61327	Protein mago nashi homolog	Magoh	-0.837416	1.19	0.945018	1.54263	1651	2.04336	0.902435	0.00823879	0.027466	1	0.833945	2.48347	2.81267
PG1391	E9PVL9;E9Q3X6;Q8BW75	Amine oxidase [flavin-containing] B	Maob	1.88969	-2.06262			1652	3.37653	0.989281	0.00825622	0.0274967	1	3.37653
PG0141	F6XXE6;A0A0G2JGI9;F8VPN4		Agl	-0.880838	0.67735			1653	1.39663	0.777253	0.00826291	0.0274967	1		1.50252	1.29075
PG2489	Q3UFJ3;P35486	Pyruvate dehydrogenase E1 component subunit alpha;Pyruvate dehydrogenase E1 component subunit alpha, somatic form, mitochondrial	Pdha1	-0.0236883	-0.00991484	0.0520311	0.0131677	1654	0.807141	0.614462	0.00826398	0.0274967	1	0.765767	0.823329	0.832327
PG0876	F7CVW0;B2RRI2;Q689Z5;Q689Z5-2;Q3TMM7;I6L981;A0A0G2JGC7;A0A0G2JEM3	Protein strawberry notch homolog 1	Sbno1	-0.425174	-0.530166	0.580946	-0.588605	1655	-1.13932	0.111555	0.00827109	0.0274967	1	-1.09995	-0.704312	-1.6137
PG4519	Q80XC2	tRNA (adenine(58)-N(1))-methyltransferase catalytic subunit TRMT61A	Trmt61a	0.207873	-0.204255	-0.213767	-0.242663	1656	0.86468	0.631722	0.008273	0.0274967	1	1.06879	0.732502	0.792749
PG0065	A0A0A0MQA5;P68368	Tubulin alpha-4A chain	Tuba4a	-0.758391	0.486885	0.904874	0.678771	1657	1.42198	0.785065	0.0082785	0.0274984	1	0.672502	1.93148	1.66194
PG2191	Q3TER1;O88888	Amyloid beta A4 precursor protein-binding family A member 3	Apba3	-0.324467	-1.11417			1658	1.35874	0.766897	0.00829977	0.0275524	1	1.34702	1.37047
PG5286	Q91V76;A0A1L1SSF8	Ester hydrolase C11orf54 homolog		-0.734196	-1.4505	1.02933	-1.68579	1659	2.13193	0.912972	0.00830516	0.0275537	1	2.54057	2.9873	0.86792
PG5823	Q9D1B9	39S ribosomal protein L28, mitochondrial	Mrpl28	-0.204643	-1.16625			1660	1.37746	0.771439	0.00833617	0.0276245	1	1.45788	1.29703
PG1023	B9EJ97;A2AG68;Q64430	Copper-transporting ATPase 1	Atp7a	-0.773057	-2.69287			1661	-3.36181	0.00345203	0.00834122	0.0276245	1			-3.36181
PG0126	A0A0G2JEC4;Q9JK48;Q9JK48-2;Q9JK48-3	Endophilin-B1	Sh3glb1	-0.110003	-0.177249	0.170148	-0.183871	1662	-0.830665	0.157703	0.00834236	0.0276245	1	-0.821902	-0.713976	-0.956116
PG2818	Q3UJ76;P62743;Q7TT10;A0A0U1RPS0	AP-2 complex subunit sigma	Ap2s1	-0.22688	0.839748	0.231337	1.06584	1663	-1.39866	0.0799419	0.00834657	0.0276245	1	-2.05662	-1.3803	-0.759062
PG3610	Q3UAP1;Q9WUQ2;D3Z3S1	Prolactin regulatory element-binding protein	Preb	-0.430663	-0.360075	0.574106	-0.380737	1664	1.04432	0.68641	0.00837096	0.027686	1	0.980117	1.45165	0.70119
PG5668	Q9CR89-2;Q9CR89;A0A0N4SVQ6	Endoplasmic reticulum-Golgi intermediate compartment protein 2	Ergic2	-0.140973	-0.932611	0.267743	-1.1025	1665	1.36922	0.76944	0.00837523	0.027686	1	1.80672	1.65304	0.647915
PG0581	E9PZY8;A2AIV2;A2AIV2-2	Protein virilizer homolog	1110037F02Rik;Kiaa1429	-1.04788	-0.36385	1.32402	-0.335129	1666	1.59388	0.821948	0.00838517	0.0277023	1	1.18358	2.49504	1.10303
PG0677	A2BGI8;Q4G0C5;Q9D868-2;Q3UWH9;Q9D868;A2BGI9;Q3UY37	Peptidyl-prolyl cis-trans isomerase;Peptidyl-prolyl cis-trans isomerase H	Ppih	0.644521	0.523355	-0.801851	0.609118	1667	1.33799	0.762355	0.00839787	0.0277123	1	1.35871	0.719818	1.93545
PG4855	Q8C4X2	Casein kinase I isoform gamma-3	Csnk1g3	-0.644329	0.918038			1668	1.40969	0.781432	0.00839875	0.0277123	1		1.27691	1.54248
PG0267	A0A0R4J0S4;Q80Y17	Lethal(2) giant larvae protein homolog 1	Llgl1	0.0523883	-0.228459	-0.0230095	-0.25953	1669	0.832648	0.623183	0.00840332	0.0277123	1	0.963307	0.829252	0.705385
PG5360	Q91YH5;E9PYT3;Q91YH5-2	Atlastin-3	Atl3	-0.471261	0.0674212	0.589465	0.143887	1670	1.01037	0.675509	0.00841453	0.0277327	1	0.670723	1.36955	0.990831
PG3922	Q504M2;Q5DTY5		Pdp2	0.498928	0.392168	-0.614613	0.460982	1671	-1.14893	0.109738	0.00846797	0.0278921	1	-1.13288	-1.62606	-0.68784
PG0427	A0A1D5RLV0;Q8C1D8;A0A1D5RMB4	Protein IWS1 homolog	Iws1	0.493149	0.0487148	-0.580321	0.0426201	1672	1.01139	0.675872	0.00850095	0.027984	1	1.22706	0.603619	1.2035
PG3729	Q3UKC8;Q80SZ7	Guanine nucleotide-binding protein subunit gamma;Guanine nucleotide-binding protein G(I)/G(S)/G(O) subunit gamma-5	Gng5	0.779014	2.56759			1673	3.33288	0.98819	0.00851187	0.0280032	1			3.33288
PG0881	B2RRP1;Q99MS8	Tubulin polyglutamylase complex subunit 1	Tpgs1	-0.621054	0.973167			1674	1.43884	0.788517	0.00853418	0.0280463	1		1.26735	1.61033
PG3794	Q5M8R9;Q4FJN9;Q3US29;Q920E5;Q3TMB3;A0A0G2JEA5;A0A0G2JDJ5;A0A0G2JEB3	Farnesyl pyrophosphate synthase	Fdps	-0.297777	0.237426	0.36527	0.337091	1675	-0.95269	0.135719	0.00853517	0.0280463	1	-1.29486	-0.764152	-0.799063
PG4242	Q6DYE8;Q99K07;Q148B3	Ectonucleotide pyrophosphatase/phosphodiesterase family member 3;Alkaline phosphodiesterase I;Nucleotide pyrophosphatase	Enpp3	0.777407	2.56215			1676	3.32595	0.988009	0.00855348	0.0280897	1			3.32595
PG5223	Q8VDM6;Q8VDM6-2	Heterogeneous nuclear ribonucleoprotein U-like protein 1	Hnrnpul1	-0.188979	0.0327885	0.249385	0.0786898	1677	-0.839692	0.155342	0.00856809	0.0281209	1	-0.999573	-0.6995	-0.820002
PG4790	Q8BXZ1	Protein disulfide-isomerase TMX3	Tmx3	0.259146	0.343852	-0.319562	0.421569	1678	0.985787	0.668241	0.00857543	0.0281282	1	0.895053	0.709329	1.35298
PG0758	Q7TQD5;Q3UGT1;A8ASF5;P97742	Carnitine O-palmitoyltransferase 1, liver isoform	Cpt1a	-0.302211	0.668315	0.336439	0.86291	1679	1.25323	0.740916	0.00858122	0.0281304	1	0.654023	1.36409	1.74157
PG2409	Q80XR5;P26369;Q505Q1;Q922I0;Q3KQM4	Splicing factor U2AF 65 kDa subunit	U2af2	-0.275591	0.090227	0.350014	0.155781	1680	-0.887521	0.146257	0.00859609	0.0281432	1	-1.13021	-0.68896	-0.843391
PG3407	Q3TUE1;A0A0G2JG00;A0A0G2JFK2		Fubp1	0.243039	-0.238538	-0.253754	-0.287331	1681	-0.879765	0.148801	0.00860026	0.0281432	1	-0.635558	-1.03358	-0.970162
PG4693	Q8K0B7;Q8BMG8;Q3T9D8;Q3UM21	Mitochondrial folate transporter/carrier	Slc25a32	0.426134	-0.299209	-0.471304	-0.376213	1682	-1.00029	0.12718	0.00860045	0.0281432	1	-0.616917	-1.28895	-1.09502
PG0805	B1AU74;Q9CWP6-2;Q9CWP6-3;Q9CWP6;Q3U0U1;Q9CWP6-4	Motile sperm domain-containing protein 2	Mospd2	0.293807	0.204372	-0.350581	0.248657	1683	-0.926663	0.139353	0.00864926	0.0282449	1	-0.915443	-1.20452	-0.660026
PG2132	Q543D7;O70433	Four and a half LIM domains protein 2	Fhl2	-0.238658	-0.0867866	0.319215	-0.0630877	1684	0.852383	0.628634	0.00864942	0.0282449	1	0.735101	1.0548	0.767244
PG3919	Q4VBX4;Q9D2M8;Q9D2M8-2;A6X925;B2KF55	Ubiquitin-conjugating enzyme E2 variant 2	Ube2v2	0.189119	-0.432774	-0.172843	-0.519811	1685	0.950696	0.65843	0.00865449	0.0282449	1	1.27921	0.876577	0.696298
PG2857	Q3TSS2;Q9CYE5;Q3UZI5;Q9CSX6;P63089;B0LAE3	Pleiotrophin	Ptn	-2.60571	-0.680063			1686	3.308	0.987464	0.00866261	0.0282449	1		3.308
PG1284	Q3UKV4;D3Z5N6;Q61103;F8WIP7	Zinc finger protein ubi-d4	Dpf2	0.112433	-0.352121	-0.0861134	-0.415218	1687	0.886307	0.640625	0.00866766	0.0282449	1	1.1239	0.85825	0.676768
PG6079	Q9ESW4	Acylglycerol kinase, mitochondrial	Agk	-0.921634	0.989705	1.0632	1.30523	1688	1.89789	0.879724	0.0086682	0.0282449	1	0.759258	2.44303	2.49137
PG4511	Q80X50-4;Q80X50;Q80X50-3;Q812D5	Ubiquitin-associated protein 2-like	Ubap2l;lig-2a	-0.103859	0.140978	0.137416	0.2037	1689	-0.8401	0.15516	0.00866906	0.0282449	1	-1.01585	-0.788306	-0.716141
PG4315	Q6PAL7	AT-hook DNA-binding motif-containing protein 1	Ahdc1	-1.0408	-0.384953			1690	-1.34921	0.0877544	0.00867663	0.0282449	1	-1.29331		-1.40511
PG2284	Q99JW7;P11440;D3Z2T9;Q8R4A4	Cyclin-dependent kinase 1	Cdk1	0.219484	-0.242724	-0.224814	-0.290519	1691	0.869609	0.633721	0.00867993	0.0282449	1	1.103	0.735406	0.770426
PG0410	A0A1B0GSX7;Q6PFD9	Nuclear pore complex protein Nup98-Nup96;Nuclear pore complex protein Nup98;Nuclear pore complex protein Nup96	Nup98	-0.378463	-0.260923	0.502836	-0.26407	1692	-0.961991	0.133539	0.00868459	0.0282449	1	-1.05531	-0.615053	-1.21562
PG4907	Q8CCG5;Q9JIW9;F6QC68	Ras-related protein Ral-B	Ralb	-0.434474	-1.27171	0.651126	-1.49215	1693	1.78395	0.858103	0.00868798	0.0282449	1	2.25612	2.36617	0.729561
PG3291	Q5BLJ4;Q3TIJ4;Q9D7H3;Q91YL8;Q3UAE6;D3Z263	RNA 3-terminal phosphate cyclase	Rtca;RtcA	0.300956	-0.353153	-0.314992	-0.431813	1694	-0.948582	0.136628	0.00872852	0.02836	1	-0.603984	-1.12706	-1.1147
PG4847	Q8C3X8	Lipase maturation factor 2	Lmf2	-0.373602	0.0988698	0.468362	0.174293	1695	-0.940475	0.138081	0.00873628	0.0283684	1	-1.24358	-0.665241	-0.9126
PG2205	O89059	QM protein		-0.757472	-2.64005			1696	-3.29459	0.00381541	0.00874538	0.0283812	1			-3.29459
PG4263	Q6NV99;Q8CB73;Q8BP50;Q69ZG0;Q6P252		Haus6;mKIAA1574	-0.09512	-0.165125	0.15111	-0.170297	1697	0.814402	0.616642	0.00875053	0.0283812	1	0.824402	0.916914	0.701889
PG4161	Q62048;D3Z375;Q62048-2	Astrocytic phosphoprotein PEA-15	Pea15;Pea15a	0.454932	-0.164851	-0.516949	-0.214709	1698	-0.977506	0.130996	0.00876964	0.028419	1	-0.657246	-1.31449	-0.960781
PG3992	Q58EU1;Q8BWU5;Q3UQ67;A0A0R4J1Y3;E0CYN9;E9QMF4	Probable tRNA N6-adenosine threonylcarbamoyltransferase	Osgep	-0.63841	-0.0659986	0.803061	-0.00521726	1699	1.12491	0.710392	0.00877251	0.028419	1	0.76975	1.64278	0.962202
PG3060	Q3UMR6;Q05769;Q7TMV2	Prostaglandin G/H synthase 2	Ptgs2	0.245377	-0.480452	-0.237384	-0.582529	1700	-0.995178	0.127907	0.00879709	0.0284696	1	-0.606748	-1.10526	-1.27353
PG5612	Q9CQF3;A0A1D5RM23;Q9CZQ0	Cleavage and polyadenylation specificity factor subunit 5	Nudt21	0.23217	-0.0805839	-0.253096	-0.0938256	1701	0.839952	0.625545	0.00879848	0.0284696	1	0.984717	0.665051	0.870087
PG5661	Q9CR41;Q9CR41-2	Huntingtin-interacting protein K	Hypk	-0.15084	0.462331	0.168957	0.599404	1702	-1.02909	0.124092	0.00881583	0.0284878	1	-1.42118	-1.00033	-0.665742
PG4166	Q62130;Q9JLJ8;A0A0R4J080;Q8CE88;Q8CAV9;Q8C3A1;Q9JLJ9	Tyrosine-protein phosphatase non-receptor type 14;Protein-tyrosine-phosphatase	Ptpn14	-0.92492	-0.0871619	1.15271	-0.00771762	1703	-1.39818	0.0803052	0.00881598	0.0284878	1	-1.90253	-0.647424	-1.64459
PG0330	A0A0R4J260;B2RRE7	OTU domain-containing protein 4	Otud4	0.312694	-0.275818	-0.335389	-0.33846	1704	0.918992	0.650073	0.00881961	0.0284878	1	1.22453	0.71656	0.815885
PG4013	Q5HZH8;Q9Z1B5;Q3TV93	Mitotic spindle assembly checkpoint protein MAD2A	Mad2l1	-0.133631	0.276307	0.162828	0.371153	1705	-0.902548	0.14444	0.0088525	0.0285772	1	-1.17505	-0.852477	-0.68012
PG3175	Q3TA75		Fxr2	-0.301096	0.0148093	0.386978	0.0658854	1706	-0.879644	0.148983	0.00887696	0.0286394	1	-1.09218	-0.646491	-0.900263
PG0100	E9PWX8;E9QPR4;A0A0A6YXG1;Q811L6;E9Q4Q9;E9Q1M8;E9Q6G0;Q811L6-2	Microtubule-associated serine/threonine-protein kinase 4	Mast4	1.09038	0.10838			1707	1.34424	0.764172	0.00888755	0.0286456	1	1.41364		1.27485
PG2249	P08249	Malate dehydrogenase, mitochondrial	Mdh2	-0.0814533	-0.0400575	0.12458	-0.0188913	1708	-0.796597	0.162972	0.00888928	0.0286456	1	-0.852764	-0.728578	-0.808448
PG3125	Q14BA9;Q9D083;A0A1L1SV84;Q9D083-3;Q9D083-2	Kinetochore protein Spc24	Spc24	0.163094	-0.181547	-0.161186	-0.211328	1709	0.827746	0.621366	0.0088959	0.0286501	1	0.99317	0.727062	0.763006
PG1513	E9Q4M4;Q9DA45;Q91VN4;Q3TJS8;Q8C2Z6	MICOS complex subunit Mic25	Chchd6	0.0951251	-0.0713746	-0.0873868	-0.0714465	1710	-0.795935	0.163336	0.0089349	0.0287196	1	-0.73395	-0.863084	-0.79077
PG3495	Q3U1T3;Q3U1T3-2	Breast cancer metastasis-suppressor 1-like protein	Brms1l	0.429339	0.974611			1711	-1.34792	0.0881177	0.00893661	0.0287196	1	-1.2659	-1.42994
PG2561	Q543X6;P47809;Q8K2U0	Dual specificity mitogen-activated protein kinase kinase 4	Map2k4	-0.367254	0.00400252	0.468185	0.0580888	1712	-0.915055	0.141715	0.0089404	0.0287196	1	-1.15854	-0.62701	-0.959613
PG3268	Q3THC1		Psmd9	1.82673	-1.99538			1713	3.26366	0.986919	0.00894064	0.0287196	1	3.26366
PG4160	Q61990-2;Q61990;B2M1R7;Q61990-3;Q3TF69	Poly(rC)-binding protein 2	Pcbp2	0.32556	-0.275372	-0.35105	-0.338963	1714	-0.922052	0.140625	0.00894357	0.0287196	1	-0.609515	-1.13485	-1.02179
PG6185	Q9QZD8	Mitochondrial dicarboxylate carrier	Slc25a10	0.707011	-0.0597546	-0.831442	-0.107053	1715	-1.16856	0.107922	0.00895543	0.0287377	1	-0.768122	-1.72675	-1.01081
PG0640	Q80VC1;Q05CC5;Q05DE4;B2RWT5;A2AR02;A2AR01	Peptidyl-prolyl cis-trans isomerase;Peptidyl-prolyl cis-trans isomerase G	Ppig	-0.246839	-0.207005	0.338697	-0.209025	1716	0.867959	0.632812	0.00895966	0.0287377	1	0.817075	1.09958	0.687224
PG2776	P61967;D3Z268;D3Z0D6;D3YXN0	AP-1 complex subunit sigma-1A	Ap1s1	0.143754	0.280925	-0.174421	0.354219	1717	-0.8996	0.144804	0.00903271	0.0289552	1	-1.01828	-1.07201	-0.608509
PG6153	Q9QUR8	Semaphorin-7A	Sema7a	0.759385	2.50106			1718	3.24822	0.986192	0.00904038	0.0289629	1			3.24822
PG0157	A0A0J9YU83;F7BJB9		Morc3	0.178936	-0.644325	-0.143679	-0.776964	1719	1.08726	0.699855	0.00904784	0.0289699	1	1.535	1.06116	0.665631
PG3806	Q3UU56;D3Z7I0;Q8BL74	General transcription factor 3C polypeptide 2	Gm29609;Gtf3c2	0.757978	2.49629			1720	3.24215	0.98601	0.00908003	0.0290518	1			3.24215
PG0897	B2RSR7;Q3ULJ0-2;Q3ULJ0	Glycerol-3-phosphate dehydrogenase [NAD(+)];Glycerol-3-phosphate dehydrogenase 1-like protein	Gpd1l	0.090536	0.163005	-0.100425	0.214747	1721	-0.833014	0.15734	0.00908397	0.0290518	1	-0.912073	-0.940677	-0.646291
PG5081	Q8K4P0	pre-mRNA 3 end processing protein WDR33	Wdr33	0.0813192	-0.155669	-0.063926	-0.173118	1722	0.799289	0.612282	0.00911408	0.0291312	1	0.903276	0.759059	0.735531
PG1841	Q3UGN1;G3X9Q2;Q61016	Guanine nucleotide-binding protein subunit gamma;Guanine nucleotide-binding protein G(I)/G(S)/G(O) subunit gamma-7	Gng7	-0.679248	0.791032			1723	1.32672	0.760174	0.00912408	0.0291462	1		1.27343	1.38001
PG2551	Q7TQD7;P46735;Q3UEQ4	Unconventional myosin-Ib	Myo1b	-0.126169	0.334306	0.149159	0.441273	1724	0.926468	0.652435	0.00914421	0.0291936	1	0.62392	0.959644	1.19584
PG1649	E9QQ10		Akap9	-0.211595	0.172449	0.265762	0.250842	1725	0.870235	0.634084	0.00916391	0.0292395	1	0.615089	1.00217	0.993446
PG3571	Q3U6G1;Q923D2;E9PZC3;E9PZC4	Flavin reductase (NADPH)	Blvrb	0.0618045	0.544952	-0.0958603	0.68286	1726	1.0668	0.693314	0.00918637	0.0292942	1	0.745904	0.910097	1.54441
PG4579	Q8BGC0	HIV Tat-specific factor 1 homolog	Htatsf1	0.531306	0.0590574	-0.627483	0.0521287	1727	-1.0207	0.125182	0.00919364	0.0292988	1	-0.789611	-1.46091	-0.81159
PG4552	Q810V0;A0PJ89;Q9D7V6	U3 small nucleolar ribonucleoprotein protein MPP10	Mphosph10	-0.541269	-1.58418	0.80564	-1.86451	1728	2.12278	0.911882	0.00919847	0.0292988	1	2.71927	2.84922	0.799856
PG2048	O35638;A2AFF6;Q3TG33	Cohesin subunit SA-2	Stag2	0.983819	0.338614	-1.19926	0.35623	1729	1.50371	0.80069	0.00921974	0.0293496	1	1.82504	0.649286	2.03681
PG6137	Q9JKN1	Zinc transporter 7	Slc30a7	-1.27818	0.0248252			1730	-1.51781	0.0681323	0.00923392	0.0293777	1	-1.78174		-1.25388
PG3910	Q4VAA9;Q8BP48;Q8R0B2;Q6ZQJ2	Methionine aminopeptidase 1;Methionine aminopeptidase	Metap1;mKIAA0094	-0.0848758	-0.305006	0.149776	-0.341712	1731	-0.846343	0.15407	0.00924338	0.0293882	1	-0.747931	-0.725647	-1.06545
PG3001	Q5PXT3;Q549F9;Q3UMN7;P97801	Survival motor neuron protein	Smn1	-2.53374	-0.662738			1732	3.21685	0.985283	0.00924787	0.0293882	1		3.21685
PG2644	Q3U2T0;Q3TQH0;P53690;Q6DFU5	Matrix metalloproteinase-14	Mmp14	-0.0184377	0.534148	0.00245141	0.676212	1733	1.05405	0.688227	0.00925759	0.0294021	1	0.694247	0.963486	1.50441
PG6286	Q9Z2B9	Ribosomal protein S6 kinase alpha-4	Rps6ka4	-0.192777	-1.13042			1734	1.3314	0.761628	0.00927859	0.0294518	1	1.41271	1.25009
PG3373	Q3TQC7;Q9WUZ9	Ectonucleoside triphosphate diphosphohydrolase 5	Entpd5	1.7973	-1.96396			1735	3.2109	0.985102	0.00928799	0.0294646	1	3.2109
PG5297	Q91VJ4;Q8BJ33	Serine/threonine-protein kinase 38	Stk38	-0.289313	0.31773	0.348613	0.434332	1736	-0.967161	0.132631	0.00931567	0.0295354	1	-1.35199	-0.800522	-0.748974
PG0383	A0A140T8T5;A0A0G2JG35;A0A0G2JFT4	Microtubule-associated protein	Map4	-2.52423	-0.66045			1737	3.20481	0.98492	0.00932929	0.0295482	1		3.20481
PG1247	E9PWB1;D3Z4N0;D3Z0X5;Q6PDH0;Q6PDH0-2;F6RUK9;E9Q307;E9PWW4;F6RYD0	Pleckstrin homology-like domain family B member 1	Phldb1	-0.438987	0.0865394	0.548751	0.164576	1738	0.963718	0.662609	0.00933046	0.0295482	1	0.630993	1.29351	0.966648
PG1827	G3X963;Q8CDM1	ATPase family AAA domain-containing protein 2	Atad2	0.302258	-0.197788	-0.32891	-0.242455	1739	0.876006	0.635174	0.00934249	0.0295693	1	1.12956	0.667204	0.831253
PG1669	F6S062;Q3TLJ9;O54804-2;O54804;Q99KD4	Choline kinase alpha	Chka	1.25042	0.831972			1740	1.74062	0.850654	0.00935838	0.0296026	1	1.34076		2.14048
PG1195	D3YWY5;D3Z442;D3YZD8;Q8R0P4	Mth938 domain-containing protein	Aamdc	0.0807744	1.13405			1741	-1.41164	0.078125	0.00940602	0.0297325	1	-1.59928	-1.224
PG2737	Q9QX59;Q3U431;Q3UWG7;P60605;G3UZX2	Ubiquitin-conjugating enzyme E2 G2	Ube2g2	0.749771	-0.324755	-0.862331	-0.433693	1742	1.23657	0.737282	0.00941102	0.0297325	1	1.81768	0.694173	1.19785
PG6288	Q9Z2D1;Q3V030	Myotubularin-related protein 2	Mtmr2	-0.277958	0.21993	0.342589	0.314142	1743	0.910705	0.647166	0.00942081	0.0297325	1	0.590059	1.08671	1.05535
PG3582	Q3U893;Q8C166;B7ZCP4;B7ZCP6;E9Q806;B7ZCP7;B7ZCP5;A3KGK7;Q571A1	Copine-1	Cpne1	-0.14703	0.127341	0.19093	0.190582	1744	0.827301	0.621003	0.00942106	0.0297325	1	0.635239	0.916156	0.930508
PG0637	A2AQL0;Q9Z1W9	STE20/SPS1-related proline-alanine-rich protein kinase	Stk39	0.576786	-1.2137			1745	-1.51291	0.0684956	0.00943175	0.0297364	1		-1.24524	-1.78059
PG3455	Q3TXV4;Q921E2	Ras-related protein Rab-31	Rab31	-0.324665	0.269979	0.395341	0.378976	1746	0.956074	0.660429	0.00943402	0.0297364	1	0.579504	1.15996	1.12876
PG0006	A0A023J6I7	Cytochrome c oxidase subunit 2	COX2	-1.77237	1.8483			1747	-3.1889	0.00454215	0.00943849	0.0297364	1	-3.1889
PG5804	Q9D0L4;Q9D0L4-2	Uncharacterized aarF domain-containing protein kinase 1	Adck1	-0.237319	0.249057	0.290921	0.346357	1748	0.90568	0.646076	0.00945356	0.0297637	1	0.590763	1.04373	1.08255
PG5479	Q99KD6;Q3UDK5;Q3U7R2;E9PZS8;Q61387	Cytochrome c oxidase subunit 7A-related protein, mitochondrial	Cox7a2l	1.78346	-1.94917			1749	3.18608	0.984193	0.00945799	0.0297637	1	3.18608
PG3727	Q3UK41;Q8BG30	Negative elongation factor A	Nelfa	0.476001	0.533141	-0.597962	0.634762	1750	1.19038	0.728561	0.00950547	0.0298961	1	1.11021	0.704995	1.75594
PG0963	B2RXS4;Q8CHG6	Plexin-B2	Plxnb2;mKIAA0315	-0.384747	0.265102	0.468697	0.377917	1751	-0.984317	0.130087	0.00951979	0.029924	1	-1.39191	-0.731513	-0.829524
PG6224	Q9WTP6-2;Q9WTP6	Adenylate kinase 2, mitochondrial;Adenylate kinase 2, mitochondrial, N-terminally processed	Ak2	-0.347629	-0.200873	0.460619	-0.193348	1752	-0.903255	0.144077	0.00953063	0.029941	1	-1.01464	-0.59227	-1.10285
PG4841	Q8C2T9;Q9Z1M8;Q3TJY5;Q8CDT0;Q8C7D0	Protein Red	Ik	0.277427	-0.498833	-0.274848	-0.607552	1753	0.997191	0.672238	0.0095565	0.0300051	1	1.41457	0.864973	0.712033
PG1153	D3YU09;Q71RH6;Q71RH5;Q548F2;Q3U0C4;Q69ZN0;Q9R111;Q8BRJ7;Q6DFY1	Guanine deaminase	Gda	-1.75878	1.83379			1754	-3.16454	0.00472384	0.00960907	0.030153	1	-3.16454
PG1898	M9T283;H5V850;M9T811;Q05A36;F8WJD6;Q69Z36	RNA-binding E3 ubiquitin-protein ligase MEX3C;RNA-binding protein MEX3B	Mex3c;Mex3b	-0.178272	-1.12557			1755	1.32063	0.758721	0.00962181	0.0301757	1	1.41085	1.23041
PG0146	A0A0G2JGQ6;A3KN70;Q8CHG1;Q9JLM8;Q8VDT3;Q80VB6;Q3UGP0;Q8BRN4;Q9JLM8-2;A0A0G2JGR9	Serine/threonine-protein kinase DCLK1	Dclk1	-0.601353	-0.793062	0.81579	-0.894868	1756	-1.38548	0.0824855	0.00966013	0.0302787	1	-1.29023	-0.760161	-2.10604
PG0715	E9Q9C5;Q8C1D9;A3KML5;Q80YP7;P63082;A4FVC9;D3Z3B2;Q3UK60	V-type proton ATPase 16 kDa proteolipid subunit	Atp6v0c;Gm15487	1.76687	-1.93146			1757	3.15634	0.982922	0.00966747	0.0302844	1	3.15634
PG2681	Q6VEU5;Q545F5;P56382;G8DXU5;G8DXS2;G8DXR6	ATP synthase subunit epsilon, mitochondrial	Atp5e	1.94805	-0.497862			1758	2.20064	0.921693	0.0096757	0.030293	1	2.82671		1.57457
PG0304	A0A0R4J1F8;E9QPB3;P59328-3;P59328;P59328-2	WD repeat and HMG-box DNA-binding protein 1	Wdhd1	-0.39357	0.116524	0.49121	0.197447	1759	0.928959	0.652798	0.00977882	0.0305964	1	0.604152	1.21682	0.965907
PG1016	B9EIE9;P46664	Adenylosuccinate synthetase isozyme 2	Adss	-0.327106	0.27766	0.397696	0.388541	1760	0.951445	0.658612	0.00979342	0.0305964	1	0.56896	1.15583	1.12954
PG2155	Q3TI40;Q3TI19;Q2M4G1;O88441	Metaxin-2	Mtx2	0.218576	-1.39879	-0.13191	-1.70024	1761	1.79724	0.859375	0.00979709	0.0305964	1	2.71303	1.88168	0.797012
PG2334	Q5FW97;P17182;Q6PHC1	Alpha-enolase	EG433182;Eno1	0.0947867	0.0615136	-0.0975282	0.090635	1762	0.787543	0.60883	0.00979729	0.0305964	1	0.770836	0.695615	0.896178
PG2981	Q3THX4;P97390	Vacuolar protein sorting-associated protein 45	Vps45	0.259253	0.237738	-0.311266	0.292157	1763	-0.895349	0.145167	0.0098007	0.0305964	1	-0.923339	-1.15189	-0.610817
PG3777	Q3UQD0;Q9QYA2	Mitochondrial import receptor subunit TOM40 homolog	Tomm40	-0.469886	-0.033707	0.595825	0.0204521	1764	-0.958578	0.133903	0.00980596	0.0305964	1	-1.23771	-0.581431	-1.05659
PG3277	Q8BH76;Q3THQ7;Q9EQ28;A0A140LIW6;A0A140LHY7	DNA polymerase delta subunit 3	Pold3	-0.615424	0.854			1765	1.32848	0.760901	0.00982333	0.0306176	1		1.21174	1.44522
PG2629	P52479;P52479-2	Ubiquitin carboxyl-terminal hydrolase 10	Usp10	0.0510207	0.202729	-0.0555882	0.266404	1766	-0.827096	0.158612	0.00982734	0.0306176	1	-0.951921	-0.910677	-0.618689
PG5088	Q8N9S3;F6S1R2;Q8N9S3-2;Q8N9S3-3;A2AF82;A2AF81	Activator of 90 kDa heat shock protein ATPase homolog 2	Ahsa2	-0.684007	0.0792844	0.846902	0.175661	1767	-1.14105	0.11101	0.00982944	0.0306176	1	-1.60777	-0.614136	-1.20125
PG1517	E9Q512;B2RY51;H3BJG4		Trip11	-0.104132	0.272093	0.127336	0.363614	1768	0.86845	0.632994	0.00985859	0.030691	1	0.615089	0.895747	1.09451
PG0232	E9Q9N6;E9PYX3;A0A0R4J227;A0A0R4J0B1;Q3T9A3;F6ZS70;E9QMP6;Q571J8;Q05512-3;Q05512-4;Q05512-2;Q05512;Q3U3A1;F6UY70;F7A3Q3;F6ZEX4;F7CVZ7	Serine/threonine-protein kinase MARK2	Mark2	0.359092	-0.304792	-0.389438	-0.377567	1769	0.92605	0.652071	0.00989033	0.0307585	1	1.27489	0.692011	0.811249
PG3222	Q3TDR0;Q8CII3;Q6GV12	3-ketodihydrosphingosine reductase	Kdsr	-0.668667	0.678875	0.78066	0.9056	1770	1.41253	0.782522	0.00989145	0.0307585	1	0.600274	1.81416	1.82314
PG1890	Q80ZL3;H3BK65;P42567;Q5JC28;F6W2Q5	Epidermal growth factor receptor substrate 15	Eps15	0.64912	-0.289289	-0.742907	-0.382255	1771	1.12225	0.708939	0.0099317	0.0308657	1	1.62561	0.653582	1.08756
PG2539	Q541S0;Q3U711;P43883;B1AXR5;Q8C5B5;Q9CY19	Perilipin;Perilipin-2	Plin2	-1.73343	1.80672			1772	-3.11909	0.0052689	0.00993916	0.0308657	1	-3.11909
PG4184	Q8CBM0;Q62523;Q3TCR9;Q7TQE2;Q8CD55	Zyxin	Zyx	-0.0489329	-0.204547	0.098146	-0.222128	1773	0.789686	0.610283	0.00994276	0.0308657	1	0.84904	0.862731	0.657289
PG6300	Q9Z2X1;Q9Z2X1-2;J3QM80;J3QMT0	Heterogeneous nuclear ribonucleoprotein F;Heterogeneous nuclear ribonucleoprotein F, N-terminally processed	Hnrnpf	0.171711	-0.224631	-0.168231	-0.264569	1774	0.816731	0.617369	0.00996042	0.0308886	1	1.01247	0.717284	0.72044
PG2299	P13011;Q8BNZ5;Q547C4;Q99PL7;P13516	Acyl-CoA desaturase 2;Acyl-CoA desaturase 1	Scd2;Scd3;Scd1	0.728758	2.39726			1775	3.11611	0.982376	0.00996135	0.0308886	1			3.11611
PG4510	Q80X32	UPF0461 protein C5orf24 homolog		0.727605	2.39335			1776	3.11114	0.981831	0.00999855	0.0309865	1			3.11114
PG4404	Q76KJ5;A0PJ57	DNA-directed RNA polymerase I subunit RPA34	Cd3eap	0.0839401	-0.121727	-0.0698043	-0.13194	1777	0.774335	0.606468	0.0100106	0.0310065	1	0.859751	0.725613	0.73764
PG5068	Q8K385;A0A0G2JFP4	Ferric-chelate reductase 1	FRRS1	0.137931	0.76562	-0.205838	0.945766	1778	1.2415	0.738554	0.0100402	0.0310806	1	0.83321	0.982381	1.90891
PG2967	Q4FJX4;P97315	Cysteine and glycine-rich protein 1	Csrp1	1.31017	0.885658	-1.63905	0.996787	1779	2.05568	0.903706	0.0100913	0.0312108	1	2.23804	0.83741	3.0916
PG4777	Q8BWR4-3;Q8BWR4;Q8BWR4-2	Ubiquitin carboxyl-terminal hydrolase 40	Usp40	-1.48698	-1.30827			1780	-2.14497	0.0314317	0.0100976	0.0312108	1	-1.53019		-2.75974
PG3079	Q543R5;Q4FJU1;Q3TWH7;Q07235;A0A087WQM1	Glia-derived nexin	Serpine2	-1.72155	1.79404			1781	-3.0978	0.00545058	0.0100993	0.0312108	1	-3.0978
PG4565	Q8BFZ9;A0A1B0GT70;A0A1B0GSD8	Erlin-2	Erlin2	-1.05461	0.594849	1.25605	0.834528	1782	1.66182	0.834121	0.0101206	0.0312592	1	0.681405	2.38763	1.91644
PG1448	E9PZ88;F8WIE1;Q8BWY6;Q3ZCX9;Q91W89;E9PYM7	Alpha-mannosidase;Alpha-mannosidase 2C1	Man2c1	1.19985	0.800657			1783	1.67116	0.835938	0.0101583	0.0313581	1	1.28441		2.05791
PG3080	Q07417	Short-chain specific acyl-CoA dehydrogenase, mitochondrial	Acads	0.38722	-0.251305	-0.427848	-0.314629	1784	-0.916054	0.141352	0.0101948	0.0314405	1	-0.582937	-1.18265	-0.982578
PG5801	Q9D0J4	ADP-ribosylation factor-like protein 2	Arl2	-0.0876881	-0.0981051	0.136762	-0.0891717	1785	0.770579	0.605196	0.0101965	0.0314405	1	0.745183	0.854521	0.712033
PG3025	Q8VDR2;Q00547-2;Q00547;Q3UPW7	Hyaluronan mediated motility receptor	Hmmr	0.682578	0.308422	-0.831005	0.343917	1786	1.18505	0.726562	0.0102051	0.0314497	1	1.35421	0.57698	1.62395
PG5376	Q91YT8	CSC1-like protein 1	Tmem63a	-0.0320078	1.24583			1787	-1.50261	0.0694041	0.0102147	0.0314615	1	-1.78961	-1.21561
PG1313	D5MCW4;Q8VC83;Q9CQ89	Protein CutA	Cuta	-0.61885	0.229783	0.755819	0.35389	1788	-1.11267	0.114826	0.0102418	0.0315272	1	-1.63152	-0.666183	-1.04032
PG5332	Q91WL8-3;Q91WL8-4;Q91WL8	WW domain-containing oxidoreductase	Wwox	2.09333	-0.583535			1789	2.35051	0.935501	0.0102517	0.0315331	1	3.05923		1.6418
PG3219	Q3TDL0;Q8BV13	COP9 signalosome complex subunit 7b	Cops7b	0.464523	-0.58342	-0.495358	-0.725924	1790	-1.12429	0.113372	0.0102587	0.0315331	1	-0.551363	-1.39004	-1.43148
PG0171	J3QMN4;A0A0U1RPV8;A0A0U1RQA4;J3QMQ8;A0A0M3HEQ0;Q9JLT4-2;Q9JLT4-4;Q9JLT4;A0A0U1RPC6;A0A0M3HEP9;D3Z0K8;Q9JLT4-3	Thioredoxin reductase 2, mitochondrial	Txnrd2	-0.381899	0.214544	0.469252	0.316031	1791	0.941571	0.655705	0.0102609	0.0315331	1	0.565448	1.20163	1.05764
PG2999	Q543U0;P97783	Protein AF1q	Mllt11	0.656526	0.976229			1792	-1.42975	0.0763081	0.0102714	0.031548	1	-1.1932	-1.6663
PG5822	Q9D1A2;Q6KAT3;Q3TG71	Cytosolic non-specific dipeptidase	Cndp2	-0.356489	-0.204635	0.471679	-0.197216	1793	0.890438	0.642442	0.0102987	0.0316142	1	0.776273	1.20921	0.685829
PG1392	E9PZE9;E9PVQ3;Q91WJ7-2;Q91WJ7;E9Q7S4;E9Q5S6	SPATS2-like protein	Spats2l	0.717589	2.3594			1794	3.06793	0.980741	0.01033	0.0316912	1			3.06793
PG0351	A0A0X1KG61;A0A0U1RQ85;Q2M4H7;P22682;A0A0U1RP47	E3 ubiquitin-protein ligase CBL	Cbl	-0.34505	-0.124183	0.451398	-0.100037	1795	0.868796	0.633176	0.0103353	0.0316912	1	0.713562	1.16326	0.729561
PG1779	G3UWH9;Q8R1U1;Q7TSQ9	Conserved oligomeric Golgi complex subunit 4	Cog4	0.546624	0.0792583	-0.647692	0.075517	1796	1.00348	0.673874	0.0103474	0.031703	1	1.23129	0.547231	1.23193
PG2153	Q3UYQ9;Q0VB85;O88396	GrpE protein homolog;GrpE protein homolog 2, mitochondrial	Grpel2	-2.41407	-0.633931			1797	3.0653	0.98056	0.0103507	0.031703	1		3.0653
PG0210	F6RT60;A0A0R4J023;Q9JLZ3;F6R307	Methylglutaconyl-CoA hydratase, mitochondrial	Auh	0.398108	-0.419872	-0.427685	-0.521078	1798	-0.987519	0.129542	0.0103659	0.031732	1	-0.548681	-1.23104	-1.18284
PG1548	Q5UE59;E9Q7C9;Q8CD76;Q7TNF4;Q7M703;Q7M702;Q7M6Z8;Q7M701;Q7M700;Q7M6Z6;O88447	Kinesin light chain 1	Klc1	-1.20398	-0.482234	1.52299	-0.466797	1799	1.69688	0.842842	0.0103917	0.0317834	1	1.26842	2.74505	1.07717
PG3297	Q3TIU4	2,5-phosphodiesterase 12	Pde12	-0.82942	0.284275	1.00723	0.437471	1800	1.30582	0.754542	0.0103943	0.0317834	1	0.635947	1.91027	1.37125
PG0513	B2RXY9;A2A5N3	Polyadenylate-binding protein	Pabpc1l	-1.69918	1.77014			1801	-3.05769	0.00581395	0.0104109	0.0317989	1	-3.05769
PG3441	Q3UA21;Q3TX70;Q9JKK1-2;Q9JKK1;A0A0A6YXG0;Q4W8V2	Syntaxin-6	Stx6	0.320019	0.65657	-0.418324	0.797968	1802	-1.18182	0.106468	0.0104109	0.0317989	1	-1.42293	-1.56586	-0.556676
PG5517	Q99LN9;D3Z7J7;D3Z6Y9;Q99LN9-2	Deoxyhypusine hydroxylase	Dohh	0.0534764	-0.101735	-0.0343938	-0.105082	1803	0.759929	0.603198	0.0104392	0.0318676	1	0.816344	0.731777	0.731667
PG2987	P97450;E9QAD6	ATP synthase-coupling factor 6, mitochondrial	Atp5j	-0.718677	-1.86962	1.04377	-2.19816	1804	2.41463	0.941134	0.0104508	0.0318686	1	3.07961	3.33661	0.827674
PG4807	Q8C052;B2RWW1;A0A1D5RLY6	Microtubule-associated protein 1S;MAP1S heavy chain;MAP1S light chain	Map1s	0.0605679	-0.0501942	-0.0470991	-0.0428063	1805	0.757923	0.602653	0.010458	0.0318686	1	0.787894	0.71439	0.771487
PG2874	P68134;Q61272;Q61264	Actin, alpha skeletal muscle	Acta1	-0.701043	-2.44879			1806	-3.05119	0.00599564	0.0104626	0.0318686	1			-3.05119
PG1250	D3Z1C5;P70662-2;P70662-3;P70662	LIM domain-binding protein 1	Ldb1	0.534837	-1.49798			1807	-1.7293	0.0543241	0.0104667	0.0318686	1		-1.3024	-2.15621
PG3108	Q0VFY6;Q80TN5-2;Q80TN5;Q3TRB3	Palmitoyltransferase;Palmitoyltransferase ZDHHC17	Zdhhc17	1.02265	0.469255			1808	1.36511	0.768169	0.0104685	0.0318686	1	1.17614		1.55407
PG4318	Q6PAT0	Probable inactive tRNA-specific adenosine deaminase-like protein 3	Adat3	-0.125647	-0.697721	0.230477	-0.817301	1809	1.07766	0.696766	0.0105427	0.0320652	1	1.38505	1.30496	0.542978
PG2449	Q545C3;P30285;Q8BP21;E9Q9E4;E9PZX7;Q9D193	Cyclin-dependent kinase 4	Cdk4	-0.0562033	-0.231722	0.109134	-0.254676	1810	0.78586	0.608103	0.0105447	0.0320652	1	0.857163	0.869835	0.630582
PG2210	Q3UKA4;P00329	Alcohol dehydrogenase 1	Adh1	-1.68861	1.75886			1811	-3.03874	0.00617733	0.0105628	0.0321024	1	-3.03874
PG0253	A0A0R4J0K4;Q9CRG1	Transmembrane 7 superfamily member 3	Tm7sf3	1.1296	1.2241			1812	-1.88592	0.0466933	0.0105844	0.0321504	1	-1.37676	-2.39509
PG1847	G3XA48;P58044	Isopentenyl-diphosphate Delta-isomerase 1	Idi1	-0.634282	0.0605399	0.788	0.148758	1813	1.07345	0.695858	0.0105932	0.0321594	1	0.645865	1.56417	1.01031
PG4797	Q8BYL4;Q3UUD9;E9PX65	Tyrosine--tRNA ligase, mitochondrial;Tyrosine--tRNA ligase	Yars2	3.46521e-05	-0.696179	0.0777145	-0.825644	1814	1.06245	0.692042	0.0106404	0.0322848	1	1.43986	1.18905	0.558453
PG5625	Q9CQN3	Mitochondrial import receptor subunit TOM6 homolog	Tomm6	-0.603649	-0.360745	0.78425	-0.367482	1815	-1.09848	0.116824	0.0106849	0.0323887	1	-1.25991	-0.552817	-1.48271
PG2760	Q0PD53;P61294	Ras-related protein Rab-6B	Rab6b	0.707151	2.32403			1816	3.02291	0.978924	0.010692	0.0323887	1			3.02291
PG5614	Q9CQG1;Q9CQG1-2	Putative glutathione-specific gamma-glutamylcyclotransferase 2	Chac2	0.840521	0.0861598	-1.00518	0.0600246	1817	1.24454	0.739826	0.0106923	0.0323887	1	1.63413	0.552183	1.5473
PG1607	E9QKZ2;Q91YE6;Q4G0B8;E0CXB2	Importin-9	Ipo9	-0.510203	0.0344173	0.639381	0.106808	1818	-0.969858	0.132267	0.0107095	0.0324231	1	-1.31198	-0.573341	-1.02425
PG5293	Q91VE0;Q9CV67	Long-chain fatty acid transport protein 4	Slc27a4	-0.522163	-0.142942	0.667991	-0.108504	1819	-0.979049	0.130632	0.0107248	0.0324419	1	-1.22316	-0.539546	-1.17445
PG5460	Q99JR6;Q3V3F1;Q3V3C7	Nicotinamide/nicotinic acid mononucleotide adenylyltransferase 3	Nmnat3	2.38952	0.522424			1820	-3.01817	0.0065407	0.0107312	0.0324419	1		-3.01817
PG1733	F8VQE9;Q8VHH5;A0A1D5RMG4;A0A0G2JER6;Q8VHH5-2	Arf-GAP with GTPase, ANK repeat and PH domain-containing protein 3	Agap3	-0.3569	0.0412795	0.45265	0.102705	1821	0.869106	0.633358	0.0107372	0.0324419	1	0.609442	1.14185	0.856023
PG0756	A7VJ98;Q80X87;Q9CQI3	Glia maturation factor beta	Gmfb	-0.946614	0.375554	1.14231	0.558318	1822	1.43438	0.787246	0.0107393	0.0324419	1	0.644448	2.11525	1.54344
PG3865	Q3V2N7		AI413582	1.6883	-1.84755			1823	3.01548	0.978379	0.0107535	0.0324669	1	3.01548
PG5507	Q99LD8;O08972;G3UZR0	N(G),N(G)-dimethylarginine dimethylaminohydrolase 2	Ddah2	0.260851	-0.0377243	-0.291332	-0.0438926	1824	-0.806217	0.161701	0.0107868	0.0325494	1	-0.670583	-1.01211	-0.735957
PG1017	D3YUW8;D3YUX1;Q3TSQ2;Q0VGT3;B9EIG6;Q8BZH4	Pogo transposable element with ZNF domain	Pogz	-0.501115	-0.493789	0.670287	-0.538067	1825	1.08508	0.698946	0.0107926	0.0325494	1	1.06011	1.57391	0.621236
PG1478	E9Q1P8	Interferon regulatory factor 2-binding protein 2	Irf2bp2	0.381218	-0.259167	-0.419933	-0.323728	1826	0.900303	0.643895	0.0108195	0.0325972	1	1.23468	0.639988	0.826244
PG2404	P26041;Q3TZQ2;Q05DU4	Moesin	Msn	0.0629692	-0.132353	-0.0434915	-0.143193	1827	0.757027	0.602108	0.0108203	0.0325972	1	0.836886	0.727062	0.707134
PG5166	Q8R4N0;Q9DCJ6	Citrate lyase subunit beta-like protein, mitochondrial	Clybl	0.703158	2.31049			1828	3.00569	0.977653	0.0108353	0.0326243	1			3.00569
PG6205	Q9R0P4;A0A0U1RPJ7;D6RI64;D3YVR9	Small acidic protein	Smap;1110004F10Rik	-1.00875	-1.82415	1.39245	-2.11911	1829	2.48677	0.945858	0.0108511	0.0326543	1	2.96118	3.63192	0.867198
PG6016	Q9DCS9;D3YUK4	NADH dehydrogenase [ubiquinone] 1 beta subcomplex subunit 10	Ndufb10	-0.109567	-0.31628	0.180659	-0.353451	1830	-0.819134	0.160247	0.0108683	0.0326881	1	-0.727996	-0.676586	-1.05282
PG1706	Q8R5C0;F7C846;P47802;D3Z3F4;G3XA66;D3YVW0;G3UYJ5;G3UXX9	Metaxin-1	Mtx1	0.0384773	-0.309312	0.000305837	-0.356997	1831	-0.805192	0.162246	0.0108933	0.0327452	1	-0.634622	-0.782233	-0.998721
PG0931	B2RV71;Q9D1I2	Bcl10-interacting CARD protein	1110007C09Rik	-0.401847	0.133303	0.499931	0.218582	1832	0.911161	0.647711	0.0109097	0.0327662	1	0.571771	1.20247	0.959242
PG5749	Q9CYI4;Q3TV90;A0A0R4J047;Q05D11;Q9CYI4-2;D3Z765	Putative RNA-binding protein Luc7-like 1	Luc7l	-0.311958	-0.0256036	0.403379	0.0174864	1833	-0.834486	0.156613	0.0109121	0.0327662	1	-1.02928	-0.585037	-0.889143
PG5268	Q8VHK9;B2RQS6;A0JLR3	ATP-dependent RNA helicase DHX36	Dhx36	-0.181213	-0.392174	0.273698	-0.440173	1834	-0.871809	0.150073	0.0109278	0.0327952	1	-0.776273	-0.657717	-1.18144
PG4265	Q6NVE8;Q6NVE8-2	WD repeat-containing protein 44	Wdr44	-0.253872	0.297548	0.307173	0.406837	1835	0.900807	0.644259	0.0109337	0.0327952	1	0.547904	1.04294	1.11158
PG1958	Q6P1B9;O08539-2;O08539	Myc box-dependent-interacting protein 1	Bin1	0.807952	-0.668438	-0.905701	-0.857539	1836	1.39281	0.776526	0.0109451	0.0328114	1	2.20977	0.868712	1.09993
PG2335	Q545V3;Q3UJ20;P17183;A0A0N4SUX5;D3Z6E4;Q922A0;D3Z2S4	Gamma-enolase;Enolase	Eno2	1.30315	0.992908			1837	1.84932	0.868096	0.0109531	0.0328175	1	1.34792		2.35072
PG2887	P70206;Q3U3W7	Plexin-A1	Plxna1	-0.58248	-0.0400513	0.733074	0.0218749	1838	1.01321	0.676417	0.0109863	0.0328992	1	0.674282	1.4815	0.883836
PG1340	E0CY64		Gtf2h4	0.88491	-0.683949			1839	-1.30434	0.0928416	0.0110024	0.0329198	1		-1.45221	-1.15647
PG5101	Q8R050-2;Q8R050;Q8CCV1;Q8BPH0;Q3UL02	Eukaryotic peptide chain release factor GTP-binding subunit ERF3A	Gspt1	0.474831	-0.420463	-0.520818	-0.52804	1840	1.01692	0.676962	0.0110052	0.0329198	1	1.49941	0.712221	0.839136
PG3007	Q4FK51;P97823;D3Z111;J3QP56;P97823-2;D3YUG4	Acyl-protein thioesterase 1	Lypla1	-0.143391	-0.618052	0.2457	-0.718703	1841	1.00566	0.6746	0.0110313	0.0329801	1	1.25597	1.23211	0.528891
PG2766	Q9DB82;P61600;E9PXA4	N-alpha-acetyltransferase 20	Naa20	0.109955	-0.219104	-0.0936667	-0.252805	1842	-0.77825	0.166061	0.011042	0.032994	1	-0.62063	-0.8294	-0.884721
PG1494	E9Q3F7;Q7TN75;H3BJQ1	Retrotransposon-derived protein PEG10	Peg10	0.562691	-2.11732			1843	-2.30166	0.025436	0.0110555	0.0329964	1		-1.58948	-3.01385
PG3513	Q3U3T6;Q3U335;Q99KH8	Serine/threonine-protein kinase 24;Serine/threonine-protein kinase 24 35 kDa subunit;Serine/threonine-protein kinase 24 12 kDa subunit	Stk24	-0.424039	-0.331162	0.563764	-0.346017	1844	-0.952961	0.135356	0.0110568	0.0329964	1	-1.0305	-0.556371	-1.27201
PG6157	Q9QX52;Q9R0A0	Peroxisomal membrane protein PEX14	Pex14	1.4187	-0.278133			1845	1.6284	0.827035	0.0110607	0.0329964	1	2.01668		1.24012
PG4146	Q61687	Transcriptional regulator ATRX	Atrx	-0.0208659	0.139732	0.0367202	0.195428	1846	-0.77606	0.166243	0.0110722	0.0330127	1	-0.904241	-0.790335	-0.633604
PG0980	B7ZCU2;B7ZCU5;Q3UAH6;Q3TPY5;Q3TMI0;Q6AXD3;B7ZCU4;B7ZCU3;Q3TJR5;Q3TJ64;B7ZCU0;J3QNK8;Q8CBW3-5;Q8CBW3-2;Q8CBW3-4;Q8CBW3-3;Q8CBW3;Q3UBL3	Abl interactor 1	Abi1	0.443542	-0.108101	-0.507621	-0.144577	1847	0.902448	0.644985	0.0111079	0.0331013	1	1.18276	0.563865	0.960722
PG5937	Q9DAK9	14 kDa phosphohistidine phosphatase	Phpt1	0.557926	0.0237836	-0.657013	0.00694763	1848	0.98474	0.66806	0.0111221	0.0331256	1	1.25169	0.529914	1.17261
PG3118	Q14A47;Q8K003	Translation machinery-associated protein 7	Tma7	-2.33893	-0.615841			1849	2.97013	0.976744	0.0111395	0.0331594	1		2.97013
PG3362	Q9D111;Q3TNK3;Q99LJ6	Glutathione peroxidase;Glutathione peroxidase 7	Gpx7	-1.64978	1.71738			1850	-2.96912	0.00690407	0.0111483	0.0331678	1	-2.96912
PG4287	Q6P4T3;Q3TP96;A2A953;P97480	Eyes absent homolog;Eyes absent homolog 3	Eya3	0.694513	2.28119			1851	2.9684	0.976562	0.0111546	0.0331686	1			2.9684
PG1659	F6QKD2;Q4VBG1;Q9CWX9;A0A0N4SVT1;A0A0N4SVK2;Q3TEK1	Probable ATP-dependent RNA helicase DDX47	Ddx47	-0.148381	-1.30523	0.306328	-1.55629	1852	1.63048	0.827762	0.0111671	0.0331877	1	2.28391	1.99045	0.617085
PG5256	Q8VEH6;Q8VEH6-2	COBW domain-containing protein 1	Cbwd1	-0.543332	0.320328	0.656913	0.458164	1853	1.06641	0.692951	0.0112096	0.0332959	1	0.536689	1.4355	1.22703
PG5656	Q9CR23;D3Z6W5;Q3UI08;Q9JJR8	Transmembrane protein 9;Transmembrane protein 9B	Tmem9;Tmem9b	-0.0418915	1.20979			1854	-1.457	0.0732195	0.0112156	0.0332959	1	-1.74349	-1.17052
PG0127	A0A0G2JEH5;Q9D081	UDP-N-acetylglucosamine transferase subunit ALG14 homolog	Alg14	1.05733	0.0171093			1855	1.27883	0.747275	0.0112327	0.0333289	1	1.40529		1.15237
PG1664	F6RG68;Q3UQN2;Q05CX7;J3QPQ1;Q3UQN2-2;Q3UQN2-3	F-BAR domain only protein 2	Fcho2	-0.442989	-1.84322	0.706849	-2.1884	1856	2.24429	0.926417	0.0112678	0.033415	1	3.04926	2.94104	0.742564
PG3014	P98083-2;P98083;P98083-3	SHC-transforming protein 1	Shc1	0.460553	-0.203522	-0.520703	-0.262324	1857	0.924298	0.651526	0.0112746	0.033417	1	1.27057	0.590112	0.912209
PG3692	Q3UHJ0;Q3UHJ0-2	AP2-associated protein kinase 1	Aak1	-0.068341	0.285834	0.0827769	0.377459	1858	-0.838058	0.155705	0.0113277	0.0335564	1	-1.07934	-0.841944	-0.592892
PG5432	Q923B6	Metalloreductase STEAP4	Steap4	-0.676715	-2.36634			1859	-2.94625	0.00726744	0.0113506	0.0336059	1			-2.94625
PG1361	E9PU96;Q571H0	Nucleolar pre-ribosomal-associated protein 1	Urb1	0.0247518	-0.472073	0.0298998	-0.554364	1860	-0.88053	0.148619	0.0114105	0.0337618	1	-0.621559	-0.815926	-1.20411
PG2432	Q3TKP3;P28658;Q3TCF4;Q8BWX1	Ataxin-10	Atxn10	-0.365501	0.268025	0.44509	0.379915	1861	-0.927748	0.139172	0.0114155	0.0337618	1	-1.32621	-0.690872	-0.766164
PG5290	Q91VA7	Isocitrate dehydrogenase [NAD] subunit, mitochondrial	Idh3b	0.519475	-0.311825	-0.583664	-0.399191	1862	0.989761	0.669513	0.0114812	0.0339242	1	1.43327	0.628916	0.907101
PG4721	Q8BR92	Paralemmin-2	Palm2	2.32108	0.505949			1863	-2.9315	0.00744913	0.0114838	0.0339242	1		-2.9315
PG0353	A0A0X1KG62;Q8C4Y3;Q69ZP4;F6SWS9	Negative elongation factor B	Nelfb	0.219102	-0.363862	-0.21473	-0.438213	1864	0.853735	0.629179	0.0114889	0.0339242	1	1.15846	0.742672	0.660069
PG1732	F8VQD7;Q05909;D6RD11	Protein-tyrosine-phosphatase;Receptor-type tyrosine-protein phosphatase gamma	Ptprg	-0.13111	0.672175	0.128331	0.853698	1865	1.11648	0.707122	0.0114998	0.0339383	1	0.61156	1.08992	1.64797
PG3927	Q52KC3;Q8BQ03;P49718	DNA helicase;DNA replication licensing factor MCM5	Mcm5	-0.282804	-0.149665	0.377823	-0.136175	1866	0.8136	0.616279	0.0115943	0.034191	1	0.708548	1.06314	0.66911
PG0801	B1ATP7;Q3U0M8;Q80Y81-2;Q80Y81	Zinc phosphodiesterase ELAC protein 2	Elac2	-0.41745	-0.396797	0.560974	-0.426593	1867	-0.96452	0.133176	0.0115989	0.034191	1	-0.999573	-0.560823	-1.33316
PG5548	Q99P72;Q99P72-3	Reticulon-4	Rtn4	0.194394	0.330499	-0.23986	0.410553	1868	0.879731	0.637718	0.0116041	0.034191	1	0.760342	0.657522	1.22133
PG5248	Q8VEA4	Mitochondrial intermembrane space import and assembly protein 40	Chchd4	-0.513672	1.82868			1869	2.106	0.910429	0.0116231	0.0342289	1		1.46507	2.74692
PG4335	Q6PDY2	2-aminoethanethiol dioxygenase	Ado	-0.395726	0.171795	0.48944	0.265024	1870	0.902371	0.644804	0.0116594	0.0343016	1	0.543697	1.18153	0.981881
PG0828	B1AY10;B1AY10-2;B1AY10-3	Transcriptional repressor NF-X1	Nfx1	-0.507909	-1.00019			1871	1.29006	0.750363	0.0116603	0.0343016	1	1.13037	1.44974
PG1215	D3YYN7;Q3UHK5;Q6ZQ49;Q6PIE5;Q8R3A9	Sodium/potassium-transporting ATPase subunit alpha-2	Atp1a2	-1.61543	1.6807			1872	-2.90755	0.0078125	0.0117048	0.0344141	1	-2.90755
PG1673	F6TB64;Q80WC1-2;Q80WC1-3;Q80WC1;Q80WC1-4	Ubinuclein-2	Ubn2	2.30044	0.500981			1873	-2.90536	0.00799419	0.0117253	0.034456	1		-2.90536
PG1810	G3X8R2;Q80VJ2	Steroid receptor RNA activator 1	Sra1	0.333409	-0.00882077	-0.381749	-0.0145481	1874	0.822908	0.620276	0.0117642	0.0345379	1	0.982416	0.553598	0.93271
PG0220	A0A0R4J069;Q9JLI6;M0QWF1;D3Z3I6;F7BB44;D3Z7G6;F6ZFP8;Q9JLI6-2	Selenocysteine lyase	Scly	-0.666136	-2.33048			1875	-2.90062	0.00817587	0.0117698	0.0345379	1			-2.90062
PG3065	Q05AG7;Q8C5P5-2;Q8C5P5	5-nucleotidase domain-containing protein 1	Nt5dc1	-0.0893793	1.17028	0.0380959	1.45773	1876	1.5686	0.816315	0.011772	0.0345379	1	0.792987	1.41481	2.49801
PG1696	F7ACR9		Macf1	-0.305459	0.0470694	0.389716	0.105581	1877	0.819889	0.618823	0.0118367	0.0346984	1	0.585836	1.05045	0.823384
PG2674	P56135;F8WHP8	ATP synthase subunit f, mitochondrial	Atp5j2	0.192998	-0.440249	-0.176962	-0.529241	1878	0.878472	0.63681	0.0118434	0.0346984	1	1.21359	0.802663	0.61916
PG2864	Q4KL81;P63260;Q3TSB7;Q3UD81;B1ATY1	Actin, cytoplasmic 2;Actin, cytoplasmic 2, N-terminally processed	Actg1	-0.489312	-0.100928	0.624757	-0.0599416	1879	0.925379	0.65189	0.0118456	0.0346984	1	0.674994	1.33072	0.770426
PG6101	Q9JIG7	Coiled-coil domain-containing protein 22	Ccdc22	-0.0713305	-0.0515786	0.113201	-0.0337645	1880	0.73504	0.594113	0.0118607	0.0347229	1	0.691391	0.797144	0.716585
PG6259	S4R1S7;Q9Z0H4-2;Q9Z0H4-6;A0A0R4J2B0;V9GX43;S4R2U7;E9QA47;Q9Z0H4-11;Q9Z0H4-7;Q9Z0H4-5;Q9Z0H4-4;Q9Z0H4;Q9Z0H4-8;Q9Z0H4-9;S4R2L5	CUGBP Elav-like family member 2	Celf2	-0.236011	0.542713	0.266013	0.704356	1881	1.02924	0.680414	0.0118666	0.0347229	1	0.541594	1.11089	1.43524
PG5271	Q8VHX6;Q8VHX6-2	Filamin-C	Flnc	-0.542148	0.336198	0.654215	0.477421	1882	1.05621	0.688953	0.0118736	0.0347248	1	0.517787	1.42136	1.22948
PG6221	Q9WTI7-3	Unconventional myosin-Ic	Myo1c	-1.01191	-0.249913	1.27128	-0.199112	1883	-1.3896	0.0817587	0.0118948	0.0347685	1	-1.84691	-0.538664	-1.78323
PG0316	E9QQ99;D3Z1Y1;A0A0R4J1R1;Q9DBY1;D3YZH4;Q9DBY1-2	E3 ubiquitin-protein ligase synoviolin	Syvn1	0.58903	0.562033	-0.73753	0.6608	1884	1.20506	0.730741	0.0119085	0.034772	1	1.17161	0.623922	1.81964
PG2085	Q545V8;O54833;Q8BPF9;A0A1D5RM74;A0A1D5RLE4;Q8CDH5	Casein kinase II subunit alpha	Csnk2a2	-0.0318661	-0.185783	0.0759284	-0.200634	1885	-0.745788	0.171512	0.0119086	0.034772	1	-0.687887	-0.689916	-0.85956
PG5269	Q8VHL1	Histone-lysine N-methyltransferase SETD7	Setd7	-0.704494	0.63677			1886	1.2114	0.73274	0.0119349	0.0348302	1		1.24579	1.177
PG4585	Q8BGF7-4;Q8BGF7-3;Q8BGF7-2;Q8BGF7	PAB-dependent poly(A)-specific ribonuclease subunit PAN2	Pan2	-2.2696	-0.599153			1887	2.88234	0.972565	0.0119439	0.0348379	1		2.88234
PG4120	Q61102	ATP-binding cassette sub-family B member 7, mitochondrial	Abcb7	0.121382	-0.557259	-0.0806932	-0.666106	1888	-0.934068	0.138808	0.011965	0.034881	1	-0.570243	-0.930606	-1.30136
PG4307	Q6P9R1	ATP-dependent RNA helicase DDX51	Ddx51	0.102697	-0.832945	-0.0361082	-1.00078	1889	-1.14795	0.110102	0.0119788	0.0349026	1	-0.631814	-1.07759	-1.73444
PG0730	A5GZX3;Q9CPU0	Lactoylglutathione lyase	Glo1	-0.470094	0.239707	0.574367	0.353891	1890	-0.964821	0.132994	0.0119885	0.0349126	1	-1.40558	-0.639045	-0.849836
PG4909	Q8CCJ3;Q8CCJ3-1	E3 UFM1-protein ligase 1	Ufl1	0.225575	0.168338	-0.264853	0.210265	1891	0.807731	0.614644	0.0120012	0.0349268	1	0.801731	0.591177	1.03028
PG0303	A0A0R4J1E8;Q6P8M1-2;Q6P8M1	Putative deoxyribonuclease TATDN1	Tatdn1	-0.699232	-0.108387	0.880295	-0.0519611	1892	-1.0851	0.118459	0.0120061	0.0349268	1	-1.44955	-0.510649	-1.29511
PG0995	B7ZP28;Q8C4S8;D3Z1C6	DENN domain-containing protein 2A	Dennd2a	-0.659546	-2.30815			1893	-2.8722	0.00853924	0.0120419	0.0350126	1			-2.8722
PG1044	C4IXU1;Q80YT7-2;E9Q1A0;B7ZNY0;G3X9L9;B2RUJ9;Q80YT7;Q3UR03	Myomegalin	Pde4dip	0.205205	-0.6789	-0.172836	-0.821264	1894	1.03808	0.682594	0.0120518	0.0350228	1	1.52106	0.997502	0.595667
PG0068	A0A0A0MQD1;Q8K1H1;Q3TTK4	Tudor domain-containing protein 7	Tdrd7	0.67179	2.20418			1895	2.87038	0.971475	0.0120596	0.035027	1			2.87038
PG4108	Q60932-2;Q3U6K8;Q3TIG8;Q3THL7;Q60932;F2Z471	Voltage-dependent anion-selective channel protein 1	Vdac1	-0.412897	-0.399229	0.555638	-0.429929	1896	-0.952448	0.135901	0.0120745	0.0350517	1	-0.983495	-0.55193	-1.32192
PG5099	Q8R034	Anaphase-promoting complex subunit 13	Anapc13	-2.25784	-0.596321			1897	2.86744	0.971112	0.0120884	0.0350736	1		2.86744
PG4266	Q6NVE9	Protein phosphatase PTC7 homolog	Pptc7	0.898795	-0.402359	-1.03716	-0.540453	1898	-1.30677	0.0922965	0.0121171	0.0351383	1	-0.595719	-1.9536	-1.37101
PG6063	Q9ERE7;D3YVR4	LDLR chaperone MESD	Mesdc2	-0.095837	0.39947	0.107147	0.518272	1899	-0.892026	0.145712	0.0121283	0.0351524	1	-1.21595	-0.895366	-0.564762
PG3241	Q3TFA9;Q9JHJ0;Q8C3Z3	Tropomodulin-3	Tmod3	0.402544	0.032189	-0.46897	0.0298381	1900	0.857597	0.629906	0.0121682	0.0352493	1	1.0319	0.525324	1.01557
PG4342	Q8BTS3;Q6PG83		Gbp9	0.668548	2.19319			1901	2.8564	0.970567	0.012197	0.0353143	1			2.8564
PG0510	A2A4P3;A2A4P4;Q3THG9	Alanyl-tRNA editing protein Aarsd1	Gm27029;Aarsd1	0.252434	-0.316627	-0.258963	-0.383323	1902	0.830687	0.622275	0.0122144	0.0353459	1	1.12633	0.684091	0.681646
PG4261	Q9JIQ4;Q9ET42;Q9JIQ5;Q6NV52;Q9JJ11;Q99LH8;Q9JJ11-2	Transforming acidic coiled-coil-containing protein 3	Tacc3	1.10769	-0.830818	-1.25684	-1.07994	1903	1.68569	0.839208	0.0122263	0.0353619	1	2.76774	0.95274	1.3366
PG2942	Q673W4;Q673W3;P83555	Killer cell immunoglobulin-like receptor 3DL1	Kir3dl1	0.66695	2.18777			1904	2.84951	0.970203	0.0122656	0.0354568	1			2.84951
PG5837	Q9D1M7	Peptidyl-prolyl cis-trans isomerase FKBP11	Fkbp11	1.59528	-1.7482			1905	2.8487	0.970022	0.0122736	0.0354615	1	2.8487
PG2690	Q9D002;Q9CZE1;Q545N1;P56873	Sjoegren syndrome/scleroderma autoantigen 1 homolog	Sssca1	0.436851	-1.03454	-0.425928	-1.2738	1906	1.40354	0.779615	0.0122904	0.0354853	1	2.22734	1.24494	0.738343
PG2648	Q8JZZ5;P53811	Phosphatidylinositol transfer protein beta isoform	Pitpnb	-0.00406118	-0.262644	0.0482628	-0.296626	1907	-0.760186	0.168605	0.0123022	0.0354853	1	-0.64119	-0.712039	-0.927328
PG1011	B9EHY2;Q80W54	CAAX prenyl protease 1 homolog	Zmpste24	-0.312437	1.67614			1908	-1.90689	0.0441497	0.012309	0.0354853	1	-2.47158	-1.3422
PG1734	F8VQF9;Q3TLI0	Trafficking protein particle complex subunit 10	Trappc10	1.59321	-1.74599			1909	2.84499	0.96984	0.0123108	0.0354853	1	2.84499
PG4615	Q8BHC2;Q9CX00	IST1 homolog	Ist1	1.10326	-0.0538055	-1.31316	-0.132034	1910	1.43443	0.787609	0.0123141	0.0354853	1	2.05498	0.558553	1.68976
PG3283	Q3UAC4;Q3TI21;Q91VN6	Probable ATP-dependent RNA helicase DDX41	Ddx41	-0.648538	-0.157484	0.822627	-0.115958	1911	1.0405	0.683866	0.0123241	0.0354953	1	0.733663	1.58371	0.804125
PG4636	Q8BIB6		2810021J22Rik	-1.57734	1.64002			1912	-2.83925	0.00890262	0.0123686	0.035605	1	-2.83925
PG0101	F6UHR6;E9PXZ2;A0A0A6YXH3;A2A8Z1;E9Q6C1;Q5FWX7;A2A8Z1-2;Q8R0G3	Oxysterol-binding protein;Oxysterol-binding protein-related protein 9	Osbpl9	-0.0993653	0.390339	0.112157	0.507424	1913	0.881756	0.638808	0.0123807	0.0356211	1	0.561235	0.882956	1.20108
PG5301	Q91VN1;Q8C2B8	Zinc finger protein 24	Znf24;Zfp191	1.58706	-1.73942			1914	2.83397	0.96875	0.0124221	0.0356995	1	2.83397
PG5805	Q9D0L8-3;Q9D0L8;D3YYS7;Q9D0L8-2;D3Z478	mRNA cap guanine-N7 methyltransferase	Rnmt	0.91947	-1.06302	-1.00981	-1.34779	1915	1.68888	0.84048	0.0124273	0.0356995	1	2.80186	1.15007	1.1147
PG0569	Q8C371;A2AGS2;Q3UU57;Q8BP44;Q543Z5;P70236;P70273;Q60521	Dual specificity mitogen-activated protein kinase kinase 6	Map2k6	2.24366	0.487312			1916	-2.83345	0.0090843	0.0124274	0.0356995	1		-2.83345
PG5811	Q9D0Q7;Q9CSZ8	39S ribosomal protein L45, mitochondrial	Mrpl45	-0.0269385	-0.145226	0.0667233	-0.151577	1917	-0.728481	0.174419	0.0124535	0.035754	1	-0.691757	-0.684191	-0.809495
PG0310	Q05BG1;E9QA19;A0A0R4J1K1;Q8BT14-3;Q3TMD4;Q8BT14-2;Q8BT14	CCR4-NOT transcription complex subunit 4	Cnot4	-0.299576	-0.229342	0.40452	-0.231975	1918	-0.822363	0.159702	0.0124593	0.035754	1	-0.889813	-0.544402	-1.03287
PG4522	Q80Y09;Q9WU78;Q9WU78-3;Q6ZPS9	Programmed cell death 6-interacting protein	Pdcd6ip	-0.106437	0.0977296	0.143981	0.151169	1919	0.748764	0.598837	0.0125098	0.0358621	1	0.597103	0.81077	0.838418
PG1188	D3YWH4;D3Z6X7;Q9DBU0;D6RGM8;D3Z279	Transmembrane 9 superfamily member 1	Tm9sf1	0.0992245	0.529448	-0.140075	0.660908	1920	0.972739	0.665153	0.01251	0.0358621	1	0.682118	0.789061	1.44704
PG1465	Q3UHE7;F8WGN6;E9Q0J5;Q9QXL2-3;Q9QXL2-2;Q9QXL2-4;Q9QXL2;Q3V416;Q3TQJ5	Kinesin-like protein;Kinesin-like protein KIF21A	Kif21a	-0.514634	-1.28878	0.749834	-1.50644	1921	1.66078	0.833394	0.0125246	0.0358852	1	2.0978	2.31026	0.57429
PG0949	D3YUM6;D3Z1C4;B2RX33;Q8BWB6	Metalloreductase STEAP2	Steap2	0.325481	-0.89538	-0.301721	-1.09504	1922	-1.23548	0.100291	0.0125584	0.0359471	1	-0.556738	-1.33134	-1.81837
PG4603	Q8BH58	TIP41-like protein	Tiprl	-0.0757963	0.318381	0.0892469	0.417755	1923	-0.83264	0.157522	0.012567	0.0359471	1	-1.09735	-0.836705	-0.563862
PG3005	Q3U9B7;Q9DCV1;Q8BQL3;Q3UBY5;Q3UAF5;Q3TIF1;P97821;D3Z220	Dipeptidyl peptidase 1;Dipeptidyl peptidase 1 exclusion domain chain;Dipeptidyl peptidase 1 heavy chain;Dipeptidyl peptidase 1 light chain	Ctsc	-0.647307	-2.26667			1924	-2.81941	0.00926599	0.0125713	0.0359471	1			-2.81941
PG3875	Q4FJK0;Q9CQ62	2,4-dienoyl-CoA reductase, mitochondrial	Decr1	0.0558865	-0.0137192	-0.04431	0.00205496	1925	0.721412	0.590116	0.0125723	0.0359471	1	0.727194	0.674744	0.762299
PG1000	B7ZWC4;Q07113;B9EKB8	Cation-independent mannose-6-phosphate receptor	Igf2r	0.547416	0.353559	-0.670435	0.409956	1926	1.04239	0.685138	0.012598	0.0360017	1	1.10861	0.533799	1.48477
PG1268	D3Z4C0		Farp2	-0.114187	-0.401622	0.193046	-0.457148	1927	0.827413	0.621185	0.0126102	0.036018	1	0.966356	0.989738	0.526143
PG5438	Q924Z2;Q924J9;Q3UNB9;Q9CWR7	Metalloreductase STEAP1	Steap1	0.527727	0.765706	-0.679251	0.91416	1928	1.29616	0.751272	0.0126299	0.0360555	1	1.1078	0.725613	2.05507
PG4919	Q8CDJ8;Q3UW71	Stonin-1	Ston1	0.502877	-0.976914	-0.510692	-1.2089	1929	1.37064	0.769804	0.0126686	0.0361472	1	2.19766	1.14842	0.765831
PG3826	Q3UXM3;Q9QYH6;Q91W72;Q3UIL5;Q8K2H5;Q571N9	Melanoma-associated antigen D1	Maged1	0.714533	-0.438128	-0.810533	-0.569082	1930	-1.15203	0.109557	0.0126841	0.0361728	1	-0.52383	-1.6449	-1.28735
PG1636	F8WJB0;E9QNV2;Q80YQ2;Q80YQ2-2;H3BK33	Mediator of RNA polymerase II transcription subunit 23	Med23	-0.174603	-0.795414	0.297691	-0.932452	1931	1.11138	0.70585	0.0126959	0.0361875	1	1.44885	1.3962	0.489088
PG5136	Q8R2Y8	Peptidyl-tRNA hydrolase 2, mitochondrial	Ptrh2	-1.08147	-1.75944	1.47563	-2.03429	1932	2.36264	0.937682	0.0127197	0.0362368	1	2.7578	3.55369	0.77644
PG3577	Q3U738	Protein disulfide-isomerase	P4hb	-1.55655	1.61782			1933	-2.80198	0.00999273	0.0127532	0.0363009	1	-2.80198
PG2368	Q3UPA1;P21278;Q91X95	Guanine nucleotide-binding protein subunit alpha-11	Gna11	-0.285774	0.107252	0.361029	0.177371	1934	0.805698	0.614281	0.0127554	0.0363009	1	0.547202	1.00918	0.860706
PG4064	Q5SWD9;Q5SWD9-2	Pre-rRNA-processing protein TSR1 homolog	Tsr1	0.197733	0.0639517	-0.22275	0.0852334	1935	-0.757088	0.169513	0.0127739	0.0363251	1	-0.717138	-0.931722	-0.622406
PG5202	Q8VCQ3	Nuclear receptor-binding factor 2	Nrbf2	0.655405	2.14864			1936	2.79971	0.967478	0.0127772	0.0363251	1			2.79971
PG1997	Q4VBC9;O09111	NADH dehydrogenase [ubiquinone] 1 beta subcomplex subunit 11, mitochondrial	Ndufb11	1.81055	-1.2108	-2.08028	-1.6005	1937	2.49367	0.946766	0.0128235	0.0364382	1	4.19684	1.27082	2.01335
PG1894	H3BL26;Q99L96;Q3TV84;O70401	Tetraspanin;Tetraspanin-6	Tspan6	1.56335	-1.7141			1938	2.79146	0.967115	0.0128647	0.0365363	1	2.79146
PG3514	Q3U343;Q91VY9;Q3TCX4	Zinc finger protein 622	Zfp622;Znf622	-0.0832848	-0.370264	0.153025	-0.421421	1939	0.801911	0.612827	0.0128754	0.0365477	1	0.93977	0.933636	0.532326
PG1304	D3Z7M5;Q9CPT5	Nucleolar protein 16	Nop16	-0.18869	-0.974569	0.329026	-1.14978	1940	1.2632	0.742369	0.0128928	0.0365782	1	1.69855	1.59305	0.498004
PG1900	H7BWZ3;Q9JM76;A0A0G2JFK7;D3Z2F7;D3Z2F8	Actin-related protein 2/3 complex subunit 3	Arpc3	0.0120779	-0.222674	0.025488	-0.249196	1941	0.737545	0.595203	0.0129084	0.0365999	1	0.842038	0.765263	0.605334
PG4692	Q8BMF4	Dihydrolipoyllysine-residue acetyltransferase component of pyruvate dehydrogenase complex, mitochondrial	Dlat	0.1729	-0.0987987	-0.179667	-0.111217	1942	0.738414	0.595567	0.0129137	0.0365999	1	0.860491	0.614298	0.740453
PG2727	Q3UHP6;P59672;P59672-2	Ankyrin repeat and SAM domain-containing protein 1A	Anks1;Anks1a	-0.0870117	-0.303996	0.15229	-0.340306	1943	-0.771503	0.167151	0.0129709	0.0367191	1	-0.674892	-0.649291	-0.990325
PG5678	Q9CRY7	Glycerophosphodiester phosphodiesterase domain-containing protein 1	Gdpd1	1.55763	-1.70799			1944	2.7812	0.966388	0.0129749	0.0367191	1	2.7812
PG2345	Q3U8E7;P18155	Bifunctional methylenetetrahydrofolate dehydrogenase/cyclohydrolase, mitochondrial;NAD-dependent methylenetetrahydrofolate dehydrogenase;Methenyltetrahydrofolate cyclohydrolase	Mthfd2	1.06506	-0.451557	-1.23518	-0.613974	1945	1.44621	0.790879	0.0129758	0.0367191	1	2.28016	0.675821	1.38264
PG4256	Q6NS46	Protein RRP5 homolog	Pdcd11	-0.4008	-0.247175	0.528873	-0.245487	1946	0.87077	0.634266	0.0129951	0.0367549	1	0.756728	1.23296	0.62262
PG4723	Q8BRC6;Q8BRC6-1	Protein MAATS1	Maats1	-1.54342	1.6038			1947	-2.77844	0.0101744	0.0130047	0.0367632	1	-2.77844
PG1410	Q3UBH9;Q3TIQ4;E9PWW6;Q3TKQ7;Q8R2Q7;Q8CEE5		Zc3h7a	0.650265	2.13122			1948	2.77754	0.966025	0.0130146	0.0367634	1			2.77754
PG1644	Q3UET8;E9QP84;G3UW74;Q6PGF3	Mediator of RNA polymerase II transcription subunit 16	Med16	0.0291576	-1.2011			1949	1.33592	0.761991	0.0130181	0.0367634	1	1.58272	1.08912
PG2256	P09528	Ferritin heavy chain;Ferritin heavy chain, N-terminally processed	Fth1	-1.00506	0.446731	1.20764	0.649871	1950	1.43954	0.788699	0.0130254	0.0367651	1	0.574582	2.15369	1.59036
PG0314	Q3V3C8;G3X9S2;A0A0R4J1Q7;P06802-2;P06802	Ectonucleotide pyrophosphatase/phosphodiesterase family member 1;Alkaline phosphodiesterase I;Nucleotide pyrophosphatase	Enpp1	0.649542	2.12877			1951	2.77442	0.965661	0.0130484	0.0368111	1			2.77442
PG3880	Q5FW82;Q4FJY6;Q64345;Q8BPC3;E9PV48	Interferon-induced protein with tetratricopeptide repeats 3	Ifit3;I830012O16Rik	0.648823	2.12633			1952	2.77132	0.96548	0.0130823	0.036873	1			2.77132
PG0193	D3YZX5;A0A0N4SWA2;Q3UQE4;D3Z150;S4R2E1;A0A0R4J0B6;Q7TMS5;D3YVG8;W8DLN2	ATP-binding cassette sub-family G member 2	Abcg2	-0.636126	-2.22877			1953	-2.77118	0.0103561	0.0130838	0.036873	1			-2.77118
PG3183	Q3TVI6;Q3TGG0;Q3TB15;Q8K3G9;Q3U3Y3;D3Z340	DCC-interacting protein 13-beta	Appl2	1.51987	-0.398024			1954	1.71575	0.84593	0.0131326	0.0369916	1	2.20283		1.22866
PG4555	Q8R2U8;Q8BFP9	[Pyruvate dehydrogenase (acetyl-transferring)] kinase isozyme 1, mitochondrial	Pdk1	-0.0314767	1.11167			1955	-1.34598	0.0884811	0.0131981	0.0371571	1	-1.60564	-1.08633
PG2869	P63330	Serine/threonine-protein phosphatase 2A catalytic subunit alpha isoform	Ppp2ca	-0.105011	-0.271772	0.171591	-0.299545	1956	0.758452	0.602834	0.0132156	0.0371603	1	0.825869	0.88897	0.560518
PG4804	Q8BZR9;Q7TPS9;Q3TLD7	Uncharacterized protein C17orf85 homolog	1200014J11Rik	1.19037	-0.587693			1957	-1.47763	0.0724927	0.0132254	0.0371603	1		-1.82992	-1.12534
PG1846	G3XA30		Nsmce4a	0.461403	-0.31498	-0.512886	-0.398314	1958	0.915696	0.648619	0.013242	0.0371603	1	1.32829	0.601841	0.816956
PG2722	Q3UJY4;P59235;Q7TT04	Nucleoporin Nup43	Nup43	0.066922	-0.226121	-0.0408462	-0.257862	1959	0.736351	0.59484	0.0132423	0.0371603	1	0.873832	0.720904	0.614319
PG4811	Q8C0E2	Vacuolar protein sorting-associated protein 26B	Vps26b	0.367386	-0.0648923	-0.418561	-0.08569	1960	-0.81303	0.160974	0.0132432	0.0371603	1	-0.601225	-1.09892	-0.738951
PG0712	A3KMF2;Q5DTZ3;G3X8R8;P59759	MKL/myocardin-like protein 2	Mkl2	0.22666	-1.16541	-0.160261	-1.41629	1961	1.43252	0.787064	0.0132451	0.0371603	1	2.21501	1.46651	0.616048
PG0069	A0A0A0MQE5;A2AHC3;A2AHC4;A2AHC3-2	Calmodulin-regulated spectrin-associated protein 1	Camsap1	-0.39091	1.79764			1962	-2.0213	0.0379724	0.0132465	0.0371603	1	-2.66391	-1.37869
PG6107	Q9JIQ3;Q7TPS3	Diablo homolog, mitochondrial	Diablo	0.678252	-0.386001	-0.770608	-0.502564	1963	-1.09021	0.117914	0.0132563	0.0371689	1	-0.513277	-1.56392	-1.19342
PG2799	P62311	U6 snRNA-associated Sm-like protein LSm3	Lsm3	0.316867	0.163675	-0.375356	0.197151	1964	-0.820467	0.159884	0.0132983	0.0372408	1	-0.772192	-1.10908	-0.580133
PG3191	Q3TC36		Uri1	1.05175	0.707794			1965	1.46743	0.79415	0.013302	0.0372408	1	1.11987		1.81499
PG1944	K3W4S6;Q9R062;V9GX26	Glycogenin-1	Gyg;Gyg1	0.719668	-0.411264	-0.818902	-0.53674	1966	-1.13026	0.112827	0.0133022	0.0372408	1	-0.515032	-1.6323	-1.24344
PG4559	Q8BFU0	R-spondin-2	Rspo2	-0.630875	-2.21097			1967	-2.74853	0.0112645	0.0133346	0.0373124	1			-2.74853
PG0622	I7HJQ8;A2AP74;Q8BIF0-2;Q8BIF0	CD99 antigen-like protein 2	Cd99l2	-0.905742	0.511807			1968	1.27103	0.744913	0.0133461	0.0373257	1		1.46989	1.07218
PG6145	Q9JM14;A2A9X5	5(3)-deoxyribonucleotidase, cytosolic type	Nt5c	0.577381	0.0646544	-0.683886	0.0552059	1969	-0.955262	0.134448	0.0133591	0.0373432	1	-0.701472	-1.43334	-0.730979
PG6276	Q9Z1P6;A0A068BGR9	NADH dehydrogenase [ubiquinone] 1 alpha subcomplex subunit 7	Ndufa7	-1.10995	1.68126	1.23699	2.16388	1970	2.3677	0.938227	0.0133725	0.0373616	1	0.714279	2.93293	3.45588
PG0651	A2AT37		Upf2	-0.165683	-0.0521744	0.227839	-0.0268155	1971	0.730368	0.59266	0.0134131	0.0374561	1	0.633823	0.867964	0.689317
PG4873	Q8C790;D3YVA9;Q8C790-2	Protein FAM221A	Fam221a	2.16983	0.469539			1972	-2.73995	0.0116279	0.0134314	0.0374681	1		-2.73995
PG3370	Q3TPZ5;Q99KJ8	Dynactin subunit 2	Dctn2	0.172533	0.109618	-0.19577	0.142972	1973	0.749314	0.599201	0.013433	0.0374681	1	0.748067	0.586206	0.913669
PG4871	Q8C6I2-3;Q8C6I2;Q8C6I2-2	Succinate dehydrogenase assembly factor 2, mitochondrial	Sdhaf2	-2.15625	-0.571867			1974	2.73879	0.962754	0.0134445	0.0374681	1		2.73879
PG5367	Q91YN2;Q03963;Q78E06	Interferon-induced, double-stranded RNA-activated protein kinase	Eif2ak2	0.412982	0.437358	-0.51382	0.523082	1975	-0.991153	0.128815	0.0134447	0.0374681	1	-1.05031	-1.40814	-0.515014
PG2661	P54818;Q3TTJ1	Galactocerebrosidase	Galc	0.641092	2.10013			1976	2.73797	0.962391	0.0134538	0.0374745	1			2.73797
PG2576	P48678;P48678-2;P48678-3	Prelamin-A/C;Lamin-A/C	Lmna	-0.171292	-0.0150612	0.231704	0.0188995	1977	0.732135	0.593387	0.0134747	0.0375138	1	0.610501	0.867216	0.718688
PG3721	Q3UJU9	Regulator of microtubule dynamics protein 3	Rmdn3	0.274116	0.0346788	-0.313192	0.043322	1978	-0.769021	0.167515	0.0135005	0.0375667	1	-0.668671	-0.99916	-0.639231
PG3224	Q3TDX2;Q8VEJ9;Q9CTW3	Vacuolar protein sorting-associated protein 4A	Vps4a	0.33165	-0.389852	-0.349356	-0.479063	1979	-0.8716	0.150254	0.0135204	0.037603	1	-0.488001	-1.06768	-1.05912
PG0117	Q99KZ1;A0A0G2JDK3;A0A0G2JGU4;Q9JIF6;A0A0G2JG79;Q3TVF4;P53612;Q6PFA1;A0A0G2JF29;Q9CRG6	Geranylgeranyl transferase type-2 subunit beta	Rabggtb	0.63836	2.09087			1980	2.72619	0.961301	0.0135886	0.0377735	1			2.72619
PG2118	O70192;Q3UPN9;P28033-2;P28033-3;P28033	CCAAT/enhancer-binding protein beta	Cebpb	-0.623368	-2.18553			1981	-2.71615	0.0123547	0.0137049	0.0380777	1			-2.71615
PG1920	I7H459;Q9DCD5	Tight junction-associated protein 1	Tjap1	0.465702	-0.824482	-0.477648	-1.01999	1982	1.20363	0.730378	0.0137313	0.0381318	1	1.91963	0.982381	0.708883
PG2172	Q6PGA2;O88667	GTP-binding protein RAD	Rrad	2.1476	0.464188			1983	-2.71179	0.0125363	0.0137558	0.0381806	1		-2.71179
PG3626	Q3UCF2;Q6A068;Q05DT4	Cell division cycle 5-like protein	Cdc5l	-0.249434	-0.28151	0.347765	-0.299671	1984	0.794412	0.611555	0.0137671	0.0381926	1	0.786076	1.04215	0.555013
PG0789	F7C0F2;Q0VF62;B1AR74;Q8CCN5;Q3TAC0;Q8CCN5-2	Breast carcinoma-amplified sequence 3 homolog	Bcas3	0.120177	0.841881	-0.190331	1.04021	1985	1.20134	0.730015	0.0137811	0.0382123	1	0.73798	0.942028	1.92401
PG3179	Q3TAL2;Q9ERN0;A0A1L1SUU4;Q3TU28	Secretory carrier-associated membrane protein 2	Scamp2	0.384815	0.548916	-0.488469	0.661417	1986	1.04086	0.684048	0.0138226	0.0382815	1	0.89991	0.625348	1.59732
PG3021	Q3UWS9;Q3U7H9;P99029-2;P99029;G3UZJ4;H3BJQ7;Q9D6X2;Q91YU9	Peroxiredoxin-5, mitochondrial	Prdx5	-0.0929581	-0.635161	0.185808	-0.743669	1987	0.949188	0.658067	0.0138245	0.0382815	1	1.23807	1.13857	0.470921
PG0877	B2RRK2;Q3UH53-2;Q3UH53	Protein sidekick-1	Sdk1	-0.620956	-2.17736			1988	-2.70574	0.0128997	0.013827	0.0382815	1			-2.70574
PG6230	Q9WTX8;Q9WTX8-2	Mitotic spindle assembly checkpoint protein MAD1	Mad1l1	-0.497386	-0.219522	0.64398	-0.203908	1989	-0.908584	0.143169	0.0138417	0.0383029	1	-1.09347	-0.47444	-1.15784
PG5800	Q9D0I9;Q3TVC5;Q3UAZ3	Arginine--tRNA ligase, cytoplasmic	Rars	-0.332014	-0.226424	0.443684	-0.225777	1990	0.813238	0.616097	0.0138547	0.0383141	1	0.725757	1.11656	0.597392
PG4133	Q61391	Neprilysin	Mme	-1.50133	1.55885			1991	-2.70298	0.0130814	0.0138596	0.0383141	1	-2.70298
PG0713	A3KMJ8;P61759;Q3TIR6	Prefoldin subunit 3	Vbp1	-0.0495098	0.253145	0.0625023	0.336063	1992	-0.774523	0.166424	0.0138947	0.0383917	1	-0.985865	-0.787292	-0.550412
PG1510	E9Q481;Q6P2K6	Serine/threonine-protein phosphatase 4 regulatory subunit 3A	Smek1	0.172806	-0.406011	-0.155158	-0.485847	1993	0.817173	0.617733	0.0139054	0.038402	1	1.12067	0.751041	0.579803
PG0989	Q3UV09;Q3UEW9;B7ZNJ0;E9PXU2;Q9Z0F8;Q3UEC0;B2RRI4;B2RRI1;Q3UNK7;Q9Z0F8-2	Disintegrin and metalloproteinase domain-containing protein 17	Adam17	0.292672	0.255996	-0.353302	0.311703	1994	-0.833925	0.156795	0.0139181	0.038418	1	-0.85384	-1.12061	-0.527328
PG1886	H3BJU7;H3BJX8;H3BJ45;H3BJ40;H3BKH9;Q60875-5;Q60875-4;Q60875;Q3TYZ4;Q60875-2;Q60875-3	Rho guanine nucleotide exchange factor 2	Arhgef2	-0.106041	0.0170529	0.149906	0.0527535	1995	0.712164	0.587391	0.0139482	0.0384816	1	0.608384	0.789061	0.739046
PG3129	Q14C26;Q9EP72;Q91VV9	ER membrane protein complex subunit 7	Emc7	0.139182	0.118702	-0.155987	0.156763	1996	-0.73559	0.172783	0.0139643	0.0384979	1	-0.761025	-0.873766	-0.571979
PG3890	Q4FZK2;Q9D8N0;Q8R1N8	Elongation factor 1-gamma	Eef1g	-0.27095	-0.387187	0.382288	-0.426792	1997	0.842293	0.626272	0.0139681	0.0384979	1	0.884241	1.12714	0.515501
PG0856	B2RQ36;Q8R4C2;Q05D93;D3Z4D2;Q8BR30;Q9CSV9;Q8C424	RUN and FYVE domain-containing protein 2	Rufy2	1.50764	-1.65461			1998	2.69158	0.960392	0.0139955	0.0385542	1	2.69158
PG2398	Q3ULD6;Q3UI57;P25206;Q3UZH2	DNA helicase;DNA replication licensing factor MCM3	Mcm3	0.0194734	-0.095959	0.00644399	-0.0952723	1999	0.698412	0.58194	0.014022	0.0386079	1	0.732225	0.696336	0.666675
[truncated: 950 more rows]

## Sheet: GOBP_Mut_WT_Neg_detectome
rank	p	pathway	n_total	n_detected	n_selected	features				pathway
1	1.08549e-07	GO:0032103 positive regulation of response to external stimulus	256	52	25	11491;11652;12168;12266;12317;12977;14268;16859;18186;19225;20085;20312;20563;20850;20955;21817;21825;22320;24088;26417;69150;80912;81702;105722;223255				Positive regulation of response to external stimulus
2	1.08604e-07	GO:0030199 collagen fibril organization	39	15	12	11977;12406;12825;12831;12832;12842;12843;16948;23892;26433;56401;338366				collagen fibril organization
3	9.26652e-06	GO:0009605 response to external stimulus	1955	457	110	11491;11529;11532;11652;11735;11765;11826;11881;12018;12042;12168;12266;12317;12490;12608;12842;12927;12933;12977;13800;13852;14251;14268;14451;14466;14468;14775;14814;14827;14828;16210;16779;16819;16859;17164;17390;17975;18186;18187;18521;19043;19106;19211;19225;19288;19324;19659;19777;20085;20210;20312;20348;20496;20563;20564;20720;20850;20955;21672;21817;21825;22138;22320;22329;23879;23892;240…				response to external stimulus
4	5.47135e-05	GO:0031349 positive regulation of defense response	272	69	25	11765;12266;14251;16783;16859;17164;17390;19225;19294;20085;20312;20850;20955;21817;22320;24088;26417;56085;59079;69150;74136;76438;80912;81702;432940				positive regulation of defense response
5	0.000124006	GO:0030198 extracellular matrix organization	212	68	24	11804;11977;12406;12825;12831;12832;12842;12843;14086;14225;14251;14268;15530;16779;16948;16997;18073;23892;26433;56401;56532;69538;100952;338366				extracellular matrix organization
6	0.000124006	GO:0043062 extracellular structure organization	213	68	24	11804;11977;12406;12825;12831;12832;12842;12843;14086;14225;14251;14268;15530;16779;16948;16997;18073;23892;26433;56401;56532;69538;100952;338366				extracellular structure organization
7	0.000124685	GO:0009611 response to wounding	411	128	38	11826;11977;12266;12367;12490;12825;12831;12842;13852;14268;14674;14775;16779;16948;17390;19211;20312;20720;20912;21672;21788;21825;22003;22371;26398;27973;66454;74012;74080;75624;77579;77889;105722;105782;211673;223255;242050;338366				response to wounding
8	0.000143023	GO:0071674 mononuclear cell migration	67	12	8	12977;20085;20312;20563;21825;23892;105722;319177				mononuclear cell migration
9	0.000146001	GO:0002682 regulation of immune system process	1183	291	72	11491;11765;11772;12042;12266;12317;12367;12370;12394;12571;12578;12608;12825;12927;12977;13383;14225;14251;14252;14775;15951;16195;16783;16825;16859;17120;17164;17390;18103;18521;18567;18669;19043;19084;19106;19294;19659;20085;20312;20563;20850;20955;21672;21813;21825;22320;22329;23879;23892;24088;24105;54411;56085;56532;59079;65963;66592;69150;69386;71805;72129;72349;74136;74256;76438;80912;817…				regulation of immune system process
10	0.000255833	GO:2000379 positive regulation of reactive oxygen species metabolic process	91	32	14	11652;11898;14784;19225;19288;21813;21825;22436;24088;26420;51793;56532;208727;276770				positive regulation of reactive oxygen species metabolic process
11	0.000299981	GO:0032101 regulation of response to external stimulus	736	175	47	11491;11652;12168;12266;12317;12490;12977;13852;14268;14775;16859;18186;18521;19043;19211;19225;20085;20312;20348;20563;20720;20850;20955;21672;21817;21825;22320;23879;23892;24088;26417;27973;53416;56320;66083;69150;71805;72129;74136;77889;78757;80912;81702;105722;223255;232345;432940				regulation of response to external stimulus
12	0.00030051	GO:0006935 chemotaxis	502	106	32	11491;11652;11735;12168;12317;12927;12933;12977;13800;14251;14268;14451;16779;16859;18186;18187;20085;20210;20312;20348;20563;20564;21825;22329;23892;56212;68193;77579;105722;105782;107449;140570				chemotaxis
13	0.00030051	GO:0042330 taxis	504	106	32	11491;11652;11735;12168;12317;12927;12933;12977;13800;14251;14268;14451;16779;16859;18186;18187;20085;20210;20312;20348;20563;20564;21825;22329;23892;56212;68193;77579;105722;105782;107449;140570				taxis
14	0.00041516	GO:0071675 regulation of mononuclear cell migration	38	8	6	12977;20312;20563;21825;23892;105722				regulation of mononuclear cell migration
15	0.000542672	GO:0050729 positive regulation of inflammatory response	112	20	10	12266;19225;20085;20312;20850;20955;21817;22320;24088;69150				positive regulation of inflammatory response
16	0.000594098	GO:0009636 response to toxic substance	95	27	12	11863;11898;11977;12018;13849;14775;14866;16819;19106;21672;26417;104184				response to toxic substance
17	0.000611225	GO:0044282 small molecule catabolic process	246	119	34	11409;11522;11529;11532;11652;11992;12039;14085;14719;18242;18642;19211;19299;19703;20425;26569;51793;52430;56357;66044;67041;69772;72129;74246;93747;104184;109801;109857;208665;229211;230234;246277;257633;270076				small molecule catabolic process
18	0.000632003	GO:0043302 positive regulation of leukocyte degranulation	24	6	5	11765;16783;20955;22320;69150				positive regulation of leukocyte degranulation
19	0.00063515	GO:0002688 regulation of leukocyte chemotaxis	98	14	8	11491;12317;12977;20312;20563;21825;23892;105722				regulation of leukocyte chemotaxis
20	0.000721679	GO:0001568 blood vessel development	624	196	50	11826;11977;12018;12168;12266;12370;12394;12490;12825;12831;12842;12843;14268;14674;14775;15530;16451;16775;16948;17390;17975;18186;18187;18706;18799;19211;19225;20181;20204;20312;20348;20563;20692;21813;21814;21825;21826;22436;23892;50767;69538;73181;74838;77579;80898;81702;107449;216527;269593;432940				blood vessel development
21	0.000731678	GO:0050921 positive regulation of chemotaxis	121	24	11	11491;11652;12168;12317;12977;14268;18186;20312;20563;21825;105722				positive regulation of chemotaxis
22	0.000731678	GO:1903038 negative regulation of leukocyte cell-cell adhesion	101	24	11	11898;12367;12578;12608;13383;16859;17120;19084;21672;72349;74256				negative regulation of leukocyte cell-cell adhesion
23	0.000815688	GO:0042060 wound healing	335	98	29	11826;12266;12490;12825;12831;12842;13852;14268;14674;14775;16948;20312;20720;20912;21672;21788;21825;22003;22371;27973;74012;75624;77579;77889;105722;105782;211673;242050;338366				wound healing
24	0.000851946	GO:0007411 axon guidance	198	43	16	11735;12168;12933;13800;14251;14451;16779;18186;18187;20348;20563;20564;68193;77579;107449;140570				axon guidance
25	0.000851946	GO:0097485 neuron projection guidance	199	43	16	11735;12168;12933;13800;14251;14451;16779;18186;18187;20348;20563;20564;68193;77579;107449;140570				neuron projection guidance
26	0.00086847	GO:0048284 organelle fusion	182	85	26	11652;11736;12018;13852;14679;20333;20955;22320;53334;56085;56418;56494;58244;66437;66592;67727;68449;71732;78287;94178;94232;103724;116733;209815;223754;269338				organelle fusion
27	0.000871975	GO:0048646 anatomical structure formation involved in morphogenesis	1210	344	79	11459;11491;11826;11977;12018;12042;12168;12266;12370;12394;12490;12831;12832;12842;13800;13823;14225;14251;14268;14674;14775;14784;15530;16451;16825;17390;17975;18016;18186;18187;18706;18799;19084;19211;19225;19250;19294;20181;20239;20312;20348;20563;20692;20866;21813;21814;21817;21825;21826;21872;22138;23892;24088;26417;50767;50876;53414;54138;66229;66993;72844;73181;74256;74838;77579;77582;808…				anatomical structure formation involved in morphogenesis
28	0.000884094	GO:0006809 nitric oxide biosynthetic process	64	21	10	11605;11652;11898;12490;18438;19225;19288;24088;26420;51793				nitric oxide biosynthetic process
29	0.00107122	GO:0048846 axon extension involved in axon guidance	41	9	6	12168;18186;18187;20348;20563;20564				axon extension involved in axon guidance
30	0.00107122	GO:1902284 neuron projection extension involved in neuron projection guidance	41	9	6	12168;18186;18187;20348;20563;20564				neuron projection extension involved in neuron projection guidance
31	0.00108467	GO:2001235 positive regulation of apoptotic signaling pathway	164	73	23	12018;12042;12122;12370;13032;14827;17210;18611;19211;21825;24105;26420;26941;54673;56532;56772;66437;73181;74256;83925;94275;107449;606496				positive regulation of apoptotic signaling pathway
32	0.00116366	GO:0002683 negative regulation of immune system process	381	100	29	12042;12367;12571;12578;12608;12825;13383;14775;16825;16859;17120;18103;18521;19043;19084;20085;20563;20850;21672;21825;23892;56085;59079;65963;69386;72349;74136;74256;232345				negative regulation of immune system process
33	0.00118422	GO:0048584 positive regulation of response to stimulus	1727	490	106	11491;11545;11652;11765;11977;12018;12042;12122;12168;12266;12317;12370;12578;12825;12842;12927;12977;13032;14225;14251;14268;14451;14775;14827;16195;16783;16859;17164;17210;17390;18186;18438;18611;19055;19060;19106;19211;19225;19294;20085;20198;20204;20312;20563;20848;20850;20955;21672;21814;21817;21825;22320;22436;23892;24088;24105;26398;26399;26407;26417;26420;26941;50876;54411;54673;56085;563…				positive regulation of response to stimulus
34	0.00128711	GO:0001501 skeletal system development	473	119	33	11977;12168;12394;12406;12832;12842;12843;13003;13383;14451;15530;17390;17936;18514;19338;20204;20340;20692;21813;21825;23892;26417;27973;54411;56401;79456;83925;84505;105722;208727;212627;239405;338366				skeletal system development
35	0.00133257	GO:0072358 cardiovascular system development	664	211	52	11826;11977;12018;12168;12266;12370;12394;12490;12825;12831;12842;12843;14268;14674;14775;15530;16451;16775;16948;17390;17975;18186;18187;18230;18706;18799;19211;19225;19250;20181;20204;20312;20348;20563;20692;21813;21814;21825;21826;22436;23892;50767;69538;73181;74838;77579;80898;81702;107449;216527;269593;432940				cardiovascular system development
36	0.00138357	GO:0015718 monocarboxylic acid transport	114	22	10	11520;11652;13723;19299;21825;26399;26420;26569;26941;239273				monocarboxylic acid transport
37	0.00138357	GO:0046209 nitric oxide metabolic process	68	22	10	11605;11652;11898;12490;18438;19225;19288;24088;26420;51793				nitric oxide metabolic process
38	0.00138357	GO:0050868 negative regulation of T cell activation	93	22	10	12367;12578;12608;13383;16859;17120;19084;21672;72349;74256				negative regulation of T cell activation
39	0.00148755	GO:0001944 vasculature development	651	207	51	11826;11977;12018;12168;12266;12370;12394;12490;12825;12831;12842;12843;14268;14674;14775;15530;16451;16775;16948;17390;17975;18186;18187;18706;18799;19211;19225;19250;20181;20204;20312;20348;20563;20692;21813;21814;21825;21826;22436;23892;50767;69538;73181;74838;77579;80898;81702;107449;216527;269593;432940				vasculature development
40	0.00167103	GO:0016054 organic acid catabolic process	177	84	25	11409;11652;11992;12039;14085;14719;18242;19299;19703;20425;26569;51793;52430;56357;66044;69772;72129;93747;104184;208665;229211;230234;246277;257633;270076				organic acid catabolic process
41	0.00168638	GO:0002687 positive regulation of leukocyte migration	121	19	9	11491;12317;12977;16859;20312;21825;24088;105722;338366				positive regulation of leukocyte migration
42	0.00168638	GO:0045428 regulation of nitric oxide biosynthetic process	56	19	9	11605;11652;11898;12490;19225;19288;24088;26420;51793				regulation of nitric oxide biosynthetic process
43	0.00172956	GO:0061448 connective tissue development	241	58	19	11977;12168;12394;12406;12831;12842;12977;15530;18706;20204;20340;21813;21825;23892;26417;83925;229285;239405;338366				connective tissue development
44	0.00191016	GO:0060343 trabecula formation	26	7	5	12842;14225;17390;21814;23892				trabecula formation
45	0.00198628	GO:0051216 cartilage development	179	42	15	11977;12168;12394;12406;12842;15530;20204;20340;21813;21825;23892;26417;83925;239405;338366				cartilage development
46	0.00207558	GO:0022610 biological adhesion	1478	487	104	11491;11735;11758;11898;11977;12042;12317;12367;12490;12552;12571;12578;12608;12816;12825;12831;12842;12927;12977;13003;13383;13723;13726;14086;14107;14225;14251;14252;14268;14468;16195;16775;16779;16796;16825;16859;17120;17390;17988;18016;18073;18074;19084;19211;19230;19294;19324;19934;20312;20563;20720;20850;20912;21346;21672;21813;21817;21825;21826;21872;22003;22329;22371;22384;23892;53414;559…				biological adhesion
47	0.00207657	GO:0043065 positive regulation of apoptotic process	546	205	50	12017;12018;12042;12122;12367;12370;12578;13032;13244;13628;14827;17210;17390;18481;18567;18611;18759;19106;19211;19225;20181;20563;21817;21825;22192;22436;24105;26398;26399;26420;26926;26941;53975;54673;56532;56772;66437;66593;73181;74256;83925;94275;105722;105782;107449;208727;223870;236732;276770;606496				positive regulation of apoptotic process
48	0.00218042	GO:0061025 membrane fusion	197	90	26	11652;11736;12018;13852;14679;19294;20333;20955;22320;53334;56398;56418;56494;58244;66437;66592;67727;68449;71732;78287;103724;108124;116733;209815;223754;269338				membrane fusion
49	0.00230467	GO:0006825 copper ion transport	17	10	6	11977;12870;74051;117167;236792;100126824				copper ion transport
50	0.00231062	GO:0003008 system process	2586	303	69	11532;11545;11735;11804;11826;12168;12367;12394;12490;12842;12843;13383;14225;14387;14775;14814;16779;17380;17390;18438;19055;19211;19225;20239;20312;20496;20563;20720;21372;21814;21872;22003;22138;22320;22333;26357;26398;26399;26417;26433;26941;50876;53416;56320;67619;70430;72108;74868;75767;77579;80898;98660;109624;109676;109857;110196;170643;170762;208727;223921;229285;230674;232906;321003;329…				system process
51	0.0024013	GO:0023056 positive regulation of signaling	1415	414	90	11491;11545;11652;12018;12042;12122;12168;12266;12317;12370;12394;12578;12825;12842;12977;13032;14225;14251;14451;14775;14827;16195;16859;17210;18186;18195;18438;18611;18642;19060;19106;19211;19225;20198;20204;20312;20720;20848;20955;21672;21814;21817;21825;22320;22436;23892;24088;24105;26398;26399;26407;26417;26420;26941;50876;54411;54673;56320;56532;56772;59126;66437;66629;67041;67169;68845;691…
52	0.0024144	GO:0045089 positive regulation of innate immune response	166	51	17	11765;14251;16783;16859;17164;17390;19294;20085;20850;24088;56085;59079;74136;76438;80912;81702;432940
53	0.00251711	GO:0007596 blood coagulation	176	47	16	12266;12490;13852;14674;20312;20720;20912;21672;21788;21825;22371;27973;74012;75624;77889;105722
54	0.0025809	GO:0043068 positive regulation of programmed cell death	551	207	50	12017;12018;12042;12122;12367;12370;12578;13032;13244;13628;14827;17210;17390;18481;18567;18611;18759;19106;19211;19225;20181;20563;21817;21825;22192;22436;24105;26398;26399;26420;26926;26941;53975;54673;56532;56772;66437;66593;73181;74256;83925;94275;105722;105782;107449;208727;223870;236732;276770;606496
55	0.00262146	GO:0022408 negative regulation of cell-cell adhesion	145	35	13	11898;12367;12578;12608;13383;16859;17120;18016;19084;20720;21672;72349;74256
56	0.00262797	GO:1901605 alpha-amino acid metabolic process	170	82	24	11898;11977;13479;14085;14583;14584;14719;18242;18452;18453;20425;20850;51793;56693;66454;67873;69051;69906;74080;104184;212647;229363;229905;230234
57	0.00268919	GO:0007162 negative regulation of cell adhesion	229	60	19	11898;12367;12578;12608;12842;13383;16859;17120;17390;18016;19084;19211;20720;21672;21825;72349;74256;140570;338366
58	0.00270473	GO:0007155 cell adhesion	1466	480	102	11491;11735;11758;11898;11977;12042;12317;12367;12490;12552;12571;12578;12608;12816;12825;12831;12842;12927;12977;13003;13383;13723;13726;14086;14107;14225;14251;14252;14268;16195;16775;16779;16796;16825;16859;17120;17390;17988;18016;18073;18074;19084;19211;19230;19294;19324;19934;20312;20563;20720;20850;20912;21346;21672;21813;21817;21825;21826;21872;22003;22329;22371;22384;23892;53414;56320;564…
59	0.00272969	GO:0009887 animal organ morphogenesis	984	243	57	11826;12018;12406;12490;12578;12608;12825;12831;12832;12842;12843;12977;13383;14225;14387;14451;14466;15530;17390;17936;18016;18186;18187;18514;18759;19084;19211;19338;20181;20204;20340;20348;20496;20563;20564;20848;20850;20866;21813;21814;21817;21825;22003;22138;23892;26417;26433;26941;50767;56207;66993;79456;83925;94275;105782;239405;606496
60	0.00306053	GO:2001057 reactive nitrogen species metabolic process	72	24	10	11605;11652;11898;12490;18438;19225;19288;24088;26420;51793
61	0.003071	GO:0006906 vesicle fusion	139	65	20	11652;11736;13852;14679;20333;20955;22320;53334;56418;56494;58244;67727;68449;71732;78287;103724;116733;209815;223754;269338
62	0.00315011	GO:0010942 positive regulation of cell death	588	219	52	11545;12017;12018;12042;12122;12367;12370;12578;13032;13244;13628;14827;17210;17390;18481;18567;18611;18759;19106;19211;19225;20181;20563;21817;21825;22192;22436;24105;26398;26399;26420;26926;26941;53975;54673;56532;56772;66437;66593;67169;73181;74256;83925;94275;105722;105782;107449;208727;223870;236732;276770;606496
63	0.00320943	GO:0007599 hemostasis	178	48	16	12266;12490;13852;14674;20312;20720;20912;21672;21788;21825;22371;27973;74012;75624;77889;105722
64	0.00320943	GO:0050817 coagulation	179	48	16	12266;12490;13852;14674;20312;20720;20912;21672;21788;21825;22371;27973;74012;75624;77889;105722
65	0.00321903	GO:0002888 positive regulation of myeloid leukocyte mediated immunity	31	5	4	12266;20955;22320;69150
66	0.00321903	GO:0006953 acute-phase response	43	5	4	14268;19225;20210;20848
67	0.00321903	GO:0017144 drug metabolic process	24	5	4	12408;13178;13479;27973
68	0.00321903	GO:0042346 positive regulation of NF-kappaB import into nucleus	21	5	4	19225;23892;24088;24105
69	0.00321903	GO:0090160 Golgi to lysosome transport	6	5	4	11736;11765;16783;78287
70	0.0032202	GO:0002684 positive regulation of immune system process	753	184	45	11491;11765;12042;12266;12317;12370;12394;12927;12977;14251;14252;15951;16195;16783;16859;17164;17390;18567;18669;19294;20085;20312;20850;20955;21813;21825;22320;22329;24088;24105;54411;56085;59079;66592;69150;72349;74136;74256;76438;80912;81702;105722;232345;338366;432940
71	0.00322969	GO:1903428 positive regulation of reactive oxygen species biosynthetic process	51	17	8	11652;11898;19225;19288;24088;26420;51793;208727
72	0.0033306	GO:1903426 regulation of reactive oxygen species biosynthetic process	73	28	11	11605;11652;11898;12490;19225;19288;20848;24088;26420;51793;208727
73	0.0033306	GO:2001238 positive regulation of extrinsic apoptotic signaling pathway	59	28	11	12042;12122;12370;14827;18611;19211;21825;24105;74256;83925;107449
74	0.00344304	GO:0046395 carboxylic acid catabolic process	161	79	23	11409;11652;11992;14085;14719;18242;19299;19703;20425;26569;51793;52430;56357;66044;69772;72129;93747;208665;229211;230234;246277;257633;270076
75	0.0034647	GO:0002685 regulation of leukocyte migration	161	32	12	11491;12317;12977;16859;20312;20563;21825;23892;24088;56532;105722;338366
76	0.0034647	GO:1903409 reactive oxygen species biosynthetic process	87	32	12	11605;11652;11898;12490;18438;19225;19288;20848;24088;26420;51793;208727
77	0.00349479	GO:0050920 regulation of chemotaxis	185	36	13	11491;11652;12168;12317;12977;14268;18186;20312;20348;20563;21825;23892;105722
78	0.00359467	GO:0030155 regulation of cell adhesion	615	180	44	11735;11898;12042;12317;12367;12571;12578;12608;12842;12977;13383;14251;14252;14268;16195;16775;16825;16859;17120;17390;18016;18073;19084;19211;20312;20720;20850;21672;21813;21817;21825;22003;22329;23892;56320;56532;68732;72349;74256;100952;107581;140570;234839;338366
79	0.00371488	GO:0072359 circulatory system development	995	319	71	11826;11977;12018;12168;12266;12367;12370;12394;12490;12825;12831;12842;12843;13003;14225;14268;14387;14674;14775;14936;15530;16451;16775;16948;17390;17975;18186;18187;18230;18706;18799;19084;19211;19225;19250;20181;20204;20312;20348;20563;20692;21813;21814;21825;21826;22003;22138;22329;22436;23892;26398;26417;50767;66993;69538;73181;74838;74868;77579;80898;81702;83925;107449;110196;192231;216274…
80	0.00385943	GO:0003208 cardiac ventricle morphogenesis	75	14	7	14225;20181;20348;21814;22003;66993;606496
81	0.00385943	GO:0045429 positive regulation of nitric oxide biosynthetic process	42	14	7	11652;11898;19225;19288;24088;26420;51793
82	0.00385943	GO:1904407 positive regulation of nitric oxide metabolic process	42	14	7	11652;11898;19225;19288;24088;26420;51793
83	0.00393246	GO:0010647 positive regulation of cell communication	1408	410	88	11491;11545;11652;11735;12018;12042;12122;12168;12266;12317;12370;12394;12578;12825;12842;12977;13032;14225;14251;14451;14775;14827;16195;16859;17210;18186;18438;18611;18642;19060;19106;19211;19225;20198;20204;20312;20720;20848;20955;21672;21814;21817;21825;22320;22436;23892;24088;24105;26398;26399;26407;26417;26420;26941;50876;54411;54673;56320;56532;56772;59126;66437;66629;67041;67169;68845;691…
84	0.00409734	GO:0001654 eye development	372	80	23	11826;12018;12168;12831;12832;13383;14451;16779;18016;18186;18759;20181;20848;21813;50933;66993;68193;77579;216274;232906;329165;544696;100126824
85	0.00409734	GO:0044801 single-organism membrane fusion	178	80	23	11652;11736;12018;13852;14679;20333;20955;22320;53334;56418;56494;58244;66437;66592;67727;68449;71732;78287;103724;116733;209815;223754;269338
86	0.00414229	GO:0044057 regulation of system process	483	108	29	11545;11826;12168;12394;14387;14814;17390;18438;19055;19211;19225;20312;22003;22138;22320;26357;26941;53416;56320;74868;75767;98660;109624;109676;110196;170762;208727;333433;606496
87	0.00415	GO:0009967 positive regulation of signal transduction	1247	368	80	11491;11545;11652;12018;12042;12122;12168;12266;12317;12370;12578;12825;12842;12977;13032;14225;14251;14451;14775;14827;16195;16859;17210;18186;18438;18611;19060;19106;19211;19225;20198;20204;20312;20848;21672;21814;21817;21825;22436;23892;24088;24105;26398;26399;26407;26417;26420;26941;50876;54411;54673;56320;56532;56772;59126;66437;66629;67169;68845;71805;73181;74256;78757;80912;81702;83409;839…
88	0.00436592	GO:0002228 natural killer cell mediated immunity	60	11	6	11765;16783;16859;19294;20850;20955
89	0.00436592	GO:0002690 positive regulation of leukocyte chemotaxis	79	11	6	11491;12317;12977;20312;21825;105722
90	0.00436592	GO:0006929 substrate-dependent cell migration	27	11	6	14268;18186;18187;20563;77579;224650
91	0.00436592	GO:0042267 natural killer cell mediated cytotoxicity	58	11	6	11765;16783;16859;19294;20850;20955
92	0.00436592	GO:0010955 negative regulation of protein processing	31	11	6	14451;20340;20720;21825;55988;232345
93	0.00436592	GO:0070207 protein homotrimerization	25	11	6	16819;54138;56615;74568;101314;110074
94	0.00436592	GO:1903318 negative regulation of protein maturation	31	11	6	14451;20340;20720;21825;55988;232345
95	0.00440183	GO:0009620 response to fungus	34	8	5	12018;12042;19288;24088;72042
96	0.00440183	GO:0034058 endosomal vesicle fusion	9	8	5	11736;71732;78287;116733;269338
97	0.00450993	GO:0050878 regulation of body fluid levels	316	76	22	11826;12266;12490;13852;14466;14674;20312;20720;20850;20912;21672;21788;21825;22320;22371;22436;27973;53416;74012;75624;77889;105722
98	0.00452433	GO:0045926 negative regulation of growth	243	67	20	12168;12578;14451;18016;18186;19211;20239;20348;20563;20564;20720;21813;23892;24088;52357;56437;217124;229285;245688;606496
99	0.00452433	GO:0090174 organelle membrane fusion	141	67	20	11652;11736;13852;14679;20333;20955;22320;53334;56418;56494;58244;67727;68449;71732;78287;103724;116733;209815;223754;269338
100	0.00490664	GO:0008015 blood circulation	430	95	26	11532;12168;12490;12843;14387;14775;17390;18438;19225;20312;20563;21814;22003;22138;26399;26433;53416;74868;80898;98660;109676;170762;208727;232906;333433;606496
101	0.00498287	GO:0015908 fatty acid transport	80	18	8	11520;11652;19299;21825;26399;26420;26569;239273
102	0.00527778	GO:0001525 angiogenesis	430	129	33	11826;12018;12266;12370;12394;12490;14268;14674;14775;15530;16451;17390;17975;18186;18187;18706;18799;19211;19225;20181;20312;20563;20692;21813;21825;21826;23892;50767;73181;74838;80898;107449;432940
103	0.0054839	GO:0031347 regulation of defense response	573	144	36	11765;12266;14251;14775;16783;16859;17164;17390;18521;19043;19225;19294;20085;20312;20563;20850;20955;21817;22320;23879;24088;26417;53416;56085;59079;66083;69150;71805;72129;74136;76438;78757;80912;81702;232345;432940
104	0.005596	GO:0065008 regulation of biological quality	3226	1000	193	11306;11409;11491;11520;11522;11529;11532;11545;11735;11758;11804;11826;11863;11972;11977;12018;12042;12122;12168;12266;12304;12317;12367;12394;12490;12571;12578;12648;12843;12870;12977;13383;13823;13852;14194;14225;14252;14268;14387;14466;14674;14775;14784;14827;14828;15441;15568;16195;16783;16819;16825;16859;17164;17390;18016;18186;18230;18438;18453;18481;18555;18642;18706;18799;19055;19211;192…
105	0.00568558	GO:0009063 cellular amino acid catabolic process	55	22	9	14085;14719;18242;20425;51793;56357;66044;230234;246277
106	0.00573786	GO:0040011 locomotion	1476	437	92	11491;11652;11735;11826;11881;11977;12168;12317;12339;12490;12825;12831;12842;12927;12933;12977;13175;13479;13800;14086;14251;14268;14451;14674;14775;14828;16195;16451;16775;16779;16825;16859;17390;18186;18187;18481;18617;18663;18759;19211;19225;19324;20085;20210;20312;20348;20563;20564;20692;20848;20850;21813;21814;21825;22003;22138;22329;23892;24088;26941;56212;56320;56532;66629;68193;68732;718…
107	0.00596026	GO:2000377 regulation of reactive oxygen species metabolic process	161	64	19	11605;11652;11898;12490;14784;19225;19288;20848;21672;21813;21825;22333;22436;24088;26420;51793;56532;208727;276770
108	0.00604785	GO:0003012 muscle system process	340	87	24	11545;13383;14225;14387;18438;19055;19225;22003;22138;26398;26399;50876;56320;70430;98660;109624;109676;110196;170762;208727;230674;333433;606496;100126824
109	0.00605315	GO:0071230 cellular response to amino acid stimulus	139	26	10	11977;12608;12825;12832;12842;12843;17390;22222;83409;107581
110	0.00605315	GO:0060048 cardiac muscle contraction	106	26	10	14387;18438;22003;22138;26399;98660;109676;170762;208727;333433
111	0.00621469	GO:0006811 ion transport	1271	278	62	11520;11652;11735;11826;11972;11977;12018;12728;12870;13383;13723;14225;14814;16796;16819;18195;18438;19055;19225;19299;20496;20499;20514;20720;20866;21825;21871;22333;26357;26399;26420;26569;26941;27376;53333;53416;54411;56085;56398;66144;66500;66592;67549;68267;74051;74136;77574;94178;98660;105722;106073;109676;117167;208795;229725;234839;235574;236792;236794;239273;333433;100126824
112	0.00621693	GO:0042130 negative regulation of T cell proliferation	57	15	7	12367;12578;12608;13383;16859;17120;19084
113	0.00621693	GO:0097576 vacuole fusion	23	15	7	22320;56085;67727;94178;94232;209815;269338
114	0.00660302	GO:0003013 circulatory system process	434	97	26	11532;12168;12490;12843;14387;14775;17390;18438;19225;20312;20563;21814;22003;22138;26399;26433;53416;74868;80898;98660;109676;170762;208727;232906;333433;606496
115	0.00734955	GO:0006954 inflammatory response	601	117	30	11491;12266;12977;14268;14775;16859;17164;19225;20085;20210;20312;20563;20848;20850;20955;21672;21817;21825;22320;24088;53416;54473;66083;67169;69150;78757;105722;232345;319177;432940
116	0.00738032	GO:0030193 regulation of blood coagulation	84	19	8	12490;13852;20720;21672;21825;27973;77889;105722
117	0.00738032	GO:0070664 negative regulation of leukocyte proliferation	73	19	8	12367;12578;12608;13383;16859;17120;19084;23892
118	0.00738032	GO:1900046 regulation of hemostasis	84	19	8	12490;13852;20720;21672;21825;27973;77889;105722
119	0.0074706	GO:0007423 sensory organ development	566	122	31	11826;12018;12168;12831;12832;13383;14451;15951;16779;17164;18016;18186;18759;20181;20204;20848;21813;26417;26941;50933;66993;68193;77579;105782;216274;216527;232906;329165;380959;544696;100126824
120	0.00752334	GO:0002532 production of molecular mediator involved in inflammatory response	55	12	6	11491;20085;20955;21672;22320;69150
121	0.00752334	GO:0002833 positive regulation of response to biotic stimulus	45	12	6	16859;19294;24088;26417;80912;81702
122	0.00776506	GO:0006952 defense response	1370	286	63	11491;11765;12042;12266;12608;12977;14251;14268;14468;14775;16451;16783;16819;16859;17164;17390;18521;19043;19106;19225;19288;19294;19324;20085;20210;20312;20563;20848;20850;20955;21672;21817;21825;22320;22333;23879;24088;26417;26939;53416;54473;55932;56085;59079;66083;66141;66874;67169;69150;71805;72042;72129;72508;74136;76438;78757;80912;81702;105722;109075;232345;319177;432940
123	0.00777259	GO:0048514 blood vessel morphogenesis	524	157	38	11826;12018;12266;12370;12394;12490;12825;14268;14674;14775;15530;16451;17390;17975;18186;18187;18706;18799;19211;19225;20181;20204;20312;20563;20692;21813;21814;21825;21826;22436;23892;50767;73181;74838;80898;107449;216527;432940
124	0.00783922	GO:0022407 regulation of cell-cell adhesion	365	84	23	11735;11898;12042;12367;12578;12608;13383;14251;14252;16195;16859;17120;18016;19084;20720;20850;21672;21813;22329;56532;72349;74256;234839
125	0.00785384	GO:0045088 regulation of innate immune response	199	61	18	11765;14251;16783;16859;17164;17390;19294;20085;20850;24088;56085;59079;74136;76438;80912;81702;232345;432940
126	0.00785384	GO:0050727 regulation of inflammatory response	281	61	18	12266;14775;16859;19225;20085;20312;20563;20850;20955;21817;22320;24088;53416;66083;69150;78757;232345;432940
127	0.00817172	GO:0045766 positive regulation of angiogenesis	131	31	11	11826;12266;12394;12490;16451;19225;20312;21813;21825;23892;80898
128	0.0081886	GO:0097191 extrinsic apoptotic signaling pathway	228	89	24	12018;12042;12122;12370;14451;14775;14827;16819;17210;18186;18611;19211;20312;21672;21825;24105;56772;66505;67169;72508;74256;83925;107449;606496
129	0.00821972	GO:0051250 negative regulation of lymphocyte activation	125	27	10	12367;12578;12608;13383;16859;17120;19084;21672;72349;74256
130	0.00831054	GO:0009653 anatomical structure morphogenesis	2591	759	149	11459;11491;11735;11826;11977;12018;12042;12168;12266;12317;12370;12394;12406;12490;12552;12578;12608;12825;12831;12832;12842;12843;12933;12977;13175;13196;13383;13800;13823;13852;14086;14225;14251;14268;14387;14451;14466;14674;14775;14784;14828;15452;15530;16210;16451;16779;16825;17390;17936;17975;18016;18186;18187;18481;18514;18706;18759;18799;19055;19084;19211;19225;19250;19294;19324;19338;201…
131	0.00839307	GO:0032814 regulation of natural killer cell activation	40	6	4	11765;16783;16859;20850
132	0.00839307	GO:0034138 toll-like receptor 3 signaling pathway	18	6	4	14251;16859;56085;76438
133	0.00839307	GO:0035089 establishment of apical/basal cell polarity	13	6	4	14086;18759;26941;105782
134	0.00839307	GO:0036124 histone H3-K9 trimethylation	14	6	4	22589;68845;84505;230674
135	0.00839307	GO:0043206 extracellular fibril organization	11	6	4	12825;12831;14225;16997
136	0.00839307	GO:0043217 myelin maintenance	13	6	4	11652;13823;17988;19211
137	0.00839307	GO:0044058 regulation of digestive system process	42	6	4	11826;22320;26357;53416
138	0.00839307	GO:0071636 positive regulation of transforming growth factor beta production	14	6	4	12490;19225;20312;21825
139	0.00839307	GO:1901532 regulation of hematopoietic progenitor cell differentiation	20	6	4	11772;12571;18567;19106
140	0.00856509	GO:0002548 monocyte chemotaxis	49	9	5	20085;20312;20563;23892;105722
141	0.00856509	GO:0002715 regulation of natural killer cell mediated immunity	42	9	5	11765;16783;16859;19294;20850
142	0.00856509	GO:0030101 natural killer cell activation	94	9	5	11765;16783;16859;20850;20955
143	0.00856509	GO:0042269 regulation of natural killer cell mediated cytotoxicity	41	9	5	11765;16783;16859;19294;20850
144	0.00856509	GO:0050922 negative regulation of chemotaxis	49	9	5	18186;20348;20563;21825;23892
145	0.00860451	GO:0061138 morphogenesis of a branching epithelium	218	57	17	12018;12977;13383;14674;14784;18186;18514;20181;20348;20496;20563;21813;21817;23892;73181;94275;239405
146	0.00864825	GO:0048731 system development	4271	1188	224	11459;11491;11652;11735;11772;11804;11826;11863;11881;11977;12017;12018;12042;12168;12266;12317;12367;12370;12394;12406;12490;12552;12571;12578;12608;12651;12825;12831;12832;12842;12843;12933;12977;13003;13175;13196;13346;13383;13595;13726;13800;13823;13852;13854;14225;14251;14268;14387;14451;14466;14674;14775;14784;14828;14936;15452;15530;15951;16195;16210;16451;16775;16779;16825;16859;16948;171…
147	0.00950011	GO:1901606 alpha-amino acid catabolic process	51	16	7	14085;14719;18242;20425;51793;104184;230234
148	0.0095726	GO:0016049 cell growth	489	164	39	11491;12168;12578;13175;13823;14268;14451;16012;16210;16779;18016;18186;18187;19777;20348;20563;20564;20720;21813;21814;23892;26398;51886;53421;56320;56401;56437;69737;74996;83409;108888;109075;110196;217124;227715;229285;236794;245688;606496
149	0.0096005	GO:0048863 stem cell differentiation	198	40	13	11772;12571;18186;18187;19106;20348;20848;23892;26417;66083;80912;226442;232345
150	0.010121	GO:2001236 regulation of extrinsic apoptotic signaling pathway	157	67	19	12042;12122;12370;14451;14775;14827;17210;18186;18611;19211;20312;21672;21825;24105;66505;72508;74256;83925;107449
151	0.0101519	GO:0001819 positive regulation of cytokine production	361	81	22	11491;11863;12042;12266;12394;12490;12608;14251;16859;17164;17975;19106;19225;20312;20850;21825;24088;26420;73181;74136;80912;81702
152	0.0105524	GO:0050818 regulation of coagulation	88	20	8	12490;13852;20720;21672;21825;27973;77889;105722
[truncated: 247 more rows]

## Sheet: GOBP_Mut_WT_Pos_detectome
rank	p	pathway	n_total	n_detected	n_selected	features			pathway	n_selected	n_total
[truncated: 182 more rows]
